# Supplementary material for: Circular RNAs in monkey muscle: age-dependent changes
Source: Aging (Albany NY). 2015 Nov 4;7(11):903–10. doi: 10.18632/aging.100834 (PMC4694061; doi:10.18632/aging.100834)
Supplement: Supplemental Table S1 — List of circRNAs identified from sequencing 24 samples at ∼20 million reads per sample; circRNAs were included if there were two or more instances of junction-spanning reads; in cases of 1 read, if the deeper libraries also contributed a read, those circRNAs were also included and were marked with an asterisk (*). [file aging-07-0903-s001.xlsx]

## Sheet: rheMac2 circRNAs
																																									age0.003	age0.005	age0.03	age2.8	age4.06	age6	age11.3	age12	age12.48
circ_ID	circRNA_name	circ_type	Minimun 2 reads	circ_chromosome	circ_start	circ_end	circ_strand	circ_length	circ_genomic_length	circ_exon_count	circ_exon_starts	circ_exon_sizes	circ_exon_genomic_start	circ_exon_genomic_end	transcript_name	flanking_intron	S01_age0.005_read_number	S02_age4.06_read_number	S03_age6_read_number	S04_age14.7_read_number	S05_age27_read_number	S06_age13.6_read_number	S07_age0.03_read_number	S08_age13_read_number	S10_age40.1_read_number	S11_age14.4_read_number	S12_age28.7_read_number	S13_age13.5_read_number	S15_age2.8_read_number	S16_age40.9_read_number	S17_age16.93_read_number	S18_age32_read_number	S19_age25.7_read_number	S20_age12.48_read_number	S21_age0.003_read_number	S24_age30.1_read_number	S28_age15.43_read_number	S29_age11.3_read_number	S30_age14.4_read_number	S31_age12_read_number	S21_age0.003_norm_read_number	S01_age0.005_norm_read_number	S07_age0.03_norm_read_number	S15_age2.8_norm_read_number	S02_age4.06_norm_read_number	S03_age6_norm_read_number	S29_age11.3_norm_read_number	S31_age12_norm_read_number	S20_age12.48_norm_read_number
mmu_circ_000002	chr1_100361120_100362159_R	circRNA	Yes*	chr1	100361120	100362159	-	241	1039	2	0,918	120,121	100361120,100362038	100361240,100362159	ENSMMUT00000029154	chr1:100288764-100361120|chr1:100362159-100426822	0	0	0	0	0	1	0	0	0	0	0	0	0	0	0	0	0	0	0	0	0	0	0	0	0	0	0	0	0	0	0	0	0
mmu_circ_000009	chr1_100724538_100744428_R	circRNA	Yes	chr1	100724538	100744428	-	367	19890	3	0,12454,19693	88,82,197	100724538,100736992,100744231	100724626,100737074,100744428	ENSMMUT00000029154	chr1:100641121-100724538|chr1:100744428-100764982	0	0	0	1	0	0	0	0	0	0	0	0	0	0	0	0	3	0	0	0	0	0	0	0	0	0	0	0	0	0	0	0	0
mmu_circ_000010	chr1_100724538_100785761_R	circRNA	Yes	chr1	100724538	100785761	-	617	61223	5	0,12454,19693,40444,61135	88,82,197,162,88	100724538,100736992,100744231,100764982,100785673	100724626,100737074,100744428,100765144,100785761	ENSMMUT00000029154	chr1:100641121-100724538|chr1:100785761-100882900	0	0	0	0	0	0	0	0	0	0	0	0	0	0	0	1	1	0	0	0	0	0	0	0	0	0	0	0	0	0	0	0	0
mmu_circ_000013	chr1_102723578_102729261_F	circRNA	Yes	chr1	102723578	102729261	+	206	5683	2	0,5558	81,125	102723578,102729136	102723659,102729261	ENSMMUT00000022941	chr1:102708081-102723578|chr1:102729261-102748131	0	0	0	0	0	0	0	1	0	0	0	1	0	0	3	0	0	1	0	0	1	0	1	0	0	0	0	0	0	0	0	0	0.705287
mmu_circ_000015	chr1_102783349_102793443_R	circRNA	Yes	chr1	102783349	102793443	-	361	10094	3	0,8838,9995	114,148,99	102783349,102792187,102793344	102783463,102792335,102793443	PREDICTED.2584.1	chr1:102780954-102783349|chr1:102793443-102801170	0	0	0	0	0	0	0	1	0	0	0	0	1	0	0	0	1	0	0	0	0	0	0	0	0	0	0	0.688568	0	0	0	0	0
mmu_circ_000016	chr1_102801170_102805290_R	circRNA	Yes	chr1	102801170	102805290	-	426	4120	3	0,2640,4025	183,148,95	102801170,102803810,102805195	102801353,102803958,102805290	PREDICTED.2394.3	chr1:102793443-102801170|chr1:102805290-102810736	0	0	0	0	0	0	0	2	0	0	0	0	0	0	0	0	0	0	0	0	2	0	0	0	0	0	0	0	0	0	0	0	0
mmu_circ_000021	chr1_102922901_102943779_F	circRNA	Yes	chr1	102928950	102936642	+	947	7692	7	0,358,4202,4670,4875,6319,7504	182,112,124,103,98,140,188	102928950,102929308,102933152,102933620,102933825,102935269,102936454	102929132,102929420,102933276,102933723,102933923,102935409,102936642	ENSMMUT00000030179	chr1:102923105-102928950|chr1:102936642-102938922	0	0	0	0	0	0	0	0	0	0	0	0	0	0	0	0	0	0	1	0	2	0	0	0	0.613597	0	0	0	0	0	0	0	0
mmu_circ_000023	chr1_102928950_102940688_F	circRNA	Yes	chr1	102928950	102940688	+	1644	11738	12	0,358,4202,4670,4875,6319,7504,9972,10682,11123,11338,11587	182,112,124,103,98,140,188,124,164,102,156,151	102928950,102929308,102933152,102933620,102933825,102935269,102936454,102938922,102939632,102940073,102940288,102940537	102929132,102929420,102933276,102933723,102933923,102935409,102936642,102939046,102939796,102940175,102940444,102940688	ENSMMUT00000030179	chr1:102923105-102928950|chr1:102940688-102943200	2	0	0	1	0	1	0	0	0	0	0	0	1	0	1	0	0	1	0	0	0	0	0	0	0	2.08991	0	0.688568	0	0	0	0	0.705287
mmu_circ_000027	chr1_102933152_102936642_F	circRNA	Yes	chr1	102933152	102936642	+	653	3490	5	0,468,673,2117,3302	124,103,98,140,188	102933152,102933620,102933825,102935269,102936454	102933276,102933723,102933923,102935409,102936642	ENSMMUT00000030179	chr1:102929420-102933152|chr1:102936642-102938922	0	0	0	0	0	0	0	2	0	1	0	0	0	0	3	0	0	1	1	0	2	0	0	0	0.613597	0	0	0	0	0	0	0	0.705287
mmu_circ_000028	chr1_102933152_102940688_F	circRNA	Yes	chr1	102933152	102940688	+	1350	7536	10	0,468,673,2117,3302,5770,6480,6921,7136,7385	124,103,98,140,188,124,164,102,156,151	102933152,102933620,102933825,102935269,102936454,102938922,102939632,102940073,102940288,102940537	102933276,102933723,102933923,102935409,102936642,102939046,102939796,102940175,102940444,102940688	ENSMMUT00000030179	chr1:102929420-102933152|chr1:102940688-102943200	1	0	0	0	1	0	0	0	0	0	0	0	0	0	0	0	0	0	0	0	0	0	0	1	0	1.04496	0	0	0	0	0	0.401374	0
mmu_circ_000030	chr1_102933620_102933923_F	circRNA	Yes	chr1	102933620	102933923	+	201	303	2	0,205	103,98	102933620,102933825	102933723,102933923	ENSMMUT00000030179	chr1:102933276-102933620|chr1:102933923-102935269	2	0	0	0	0	0	0	0	0	0	0	0	0	0	0	0	0	0	0	0	0	0	0	0	0	2.08991	0	0	0	0	0	0	0
mmu_circ_000032	chr1_102935269_102936642_F	circRNA	Yes	chr1	102935269	102936642	+	328	1373	2	0,1185	140,188	102935269,102936454	102935409,102936642	ENSMMUT00000030179	chr1:102933923-102935269|chr1:102936642-102938922	0	0	0	0	0	0	0	0	0	0	0	0	0	0	1	0	0	0	1	0	0	0	0	0	0.613597	0	0	0	0	0	0	0	0
mmu_circ_000036	chr1_102938922_102955983_F	circRNA	Yes	chr1	102938922	102955983	+	1844	17061	12	0,710,1151,1366,4278,4497,4722,8111,11279,11662,12486,16958	124,164,102,400,125,113,135,131,137,134,176,103	102938922,102939632,102940073,102940288,102943200,102943419,102943644,102947033,102950201,102950584,102951408,102955880	102939046,102939796,102940175,102940688,102943325,102943532,102943779,102947164,102950338,102950718,102951584,102955983	PREDICTED.1724.1	chr1:102936642-102938922|chr1:102955983-102959855	0	0	0	0	0	0	2	0	0	0	0	0	0	0	0	0	0	0	0	0	0	0	0	0	0	0	1.98065	0	0	0	0	0	0
mmu_circ_000037	chr1_102938922_102955983_F	circRNA	Yes	chr1	102938922	102955983	+	1751	17061	13	0,710,1151,1366,1615,4278,4497,4722,8111,11279,11662,12486,16958	124,164,102,156,151,125,113,135,131,137,134,176,103	102938922,102939632,102940073,102940288,102940537,102943200,102943419,102943644,102947033,102950201,102950584,102951408,102955880	102939046,102939796,102940175,102940444,102940688,102943325,102943532,102943779,102947164,102950338,102950718,102951584,102955983	ENSMMUT00000030179	chr1:102936642-102938922|chr1:102955983-102959855	0	0	1	0	0	0	0	0	0	0	0	0	2	0	1	0	0	0	0	0	0	0	0	0	0	0	0	1.37714	0	0.993085	0	0	0
mmu_circ_000041	chr1_102943200_102951584_F	circRNA	Yes	chr1	102943200	102951584	+	951	8384	7	0,219,444,3833,7001,7384,8208	125,113,135,131,137,134,176	102943200,102943419,102943644,102947033,102950201,102950584,102951408	102943325,102943532,102943779,102947164,102950338,102950718,102951584	ENSMMUT00000030179	chr1:102940688-102943200|chr1:102951584-102955880	0	0	0	0	0	0	0	0	1	0	0	0	0	0	0	0	0	0	1	1	1	0	1	0	0.613597	0	0	0	0	0	0	0	0
mmu_circ_000046	chr1_102950201_102955983_F	circRNA	Yes	chr1	102950201	102955983	+	550	5782	4	0,383,1207,5679	137,134,176,103	102950201,102950584,102951408,102955880	102950338,102950718,102951584,102955983	ENSMMUT00000030179	chr1:102947164-102950201|chr1:102955983-102959855	0	0	0	0	0	0	1	1	0	0	0	0	0	0	2	0	0	1	1	0	1	0	0	0	0.613597	0	0.990325	0	0	0	0	0	0.705287
mmu_circ_000048	chr1_102959855_102971985_F	circRNA	Yes	chr1	102959855	102971985	+	799	12130	5	0,2040,9106,10813,11918	226,112,136,113,212	102959855,102961895,102968961,102970668,102971773	102960081,102962007,102969097,102970781,102971985	ENSMMUT00000030179	chr1:102955983-102959855|chr1:102971985-102973641	1	0	0	0	0	0	0	0	0	0	0	0	0	0	0	0	0	1	0	0	0	0	0	0	0	1.04496	0	0	0	0	0	0	0.705287
mmu_circ_000049	chr1_102959855_102973739_F	circRNA	Yes	chr1	102959855	102973739	+	897	13884	6	0,2040,9106,10813,11918,13786	226,112,136,113,212,98	102959855,102961895,102968961,102970668,102971773,102973641	102960081,102962007,102969097,102970781,102971985,102973739	ENSMMUT00000030179	chr1:102955983-102959855|chr1:102973739-102975003	0	0	0	0	0	0	0	0	0	0	1	0	1	0	0	1	1	0	0	0	0	0	0	0	0	0	0	0.688568	0	0	0	0	0
mmu_circ_000050	chr1_102968961_102975336_F	circRNA	Yes	chr1	102968961	102975336	+	781	6375	6	0,1707,2812,4680,6042,6241	136,113,212,98,88,134	102968961,102970668,102971773,102973641,102975003,102975202	102969097,102970781,102971985,102973739,102975091,102975336	ENSMMUT00000030179	chr1:102962007-102968961|chr1:102975336-102980102	0	0	0	1	0	0	0	2	1	0	0	0	0	0	1	0	0	0	0	0	0	0	0	0	0	0	0	0	0	0	0	0	0
mmu_circ_000051	chr1_102971773_102973739_F	circRNA	Yes	chr1	102971773	102973739	+	310	1966	2	0,1868	212,98	102971773,102973641	102971985,102973739	ENSMMUT00000030179	chr1:102970781-102971773|chr1:102973739-102975003	0	0	0	3	0	0	0	0	0	0	0	0	0	0	2	0	0	0	0	0	0	0	0	2	0	0	0	0	0	0	0	0.802748	0
mmu_circ_000054	chr1_103064761_103073150_F	circRNA	Yes	chr1	103064761	103073150	+	278	8389	2	0,8266	155,123	103064761,103073027	103064916,103073150	ENSMMUT00000046611	chr1:103058897-103064761|chr1:103073150-103077407	0	0	0	0	1	0	0	0	0	0	0	0	0	1	1	0	0	0	0	0	0	0	0	0	0	0	0	0	0	0	0	0	0
mmu_circ_000055	chr1_103064761_103077576_F	circRNA	Yes	chr1	103064761	103077576	+	447	12815	3	0,8266,12646	155,123,169	103064761,103073027,103077407	103064916,103073150,103077576	ENSMMUT00000046611	chr1:103058897-103064761|chr1:103077576-103082485	0	0	0	0	1	0	0	0	0	0	0	0	0	0	1	0	0	0	0	0	0	0	0	0	0	0	0	0	0	0	0	0	0
mmu_circ_000056	chr1_103082485_103085032_F	circRNA	Yes	chr1	103082485	103085032	+	253	2547	2	0,2413	119,134	103082485,103084898	103082604,103085032	ENSMMUT00000046611	chr1:103077576-103082485|chr1:103085032-103089611	0	0	0	0	1	0	1	1	0	0	0	0	0	0	0	0	0	0	0	0	0	0	0	0	0	0	0.990325	0	0	0	0	0	0
mmu_circ_000057	chr1_1031117_1037593_R	circRNA	Yes	chr1	1031117	1037593	-	340	6476	3	0,5550,6386	157,93,90	1031117,1036667,1037503	1031274,1036760,1037593	PREDICTED.72.1	chr1:1020661-1031117|chr1:1037593-1038263	0	0	0	0	0	0	0	0	0	0	0	0	0	0	0	2	0	0	0	0	0	0	0	0	0	0	0	0	0	0	0	0	0
mmu_circ_000058	chr1_1031117_1052380_R	circRNA	Yes	chr1	1031117	1052380	-	1345	21263	9	0,6386,7146,9885,15806,16710,16914,20472,21182	157,90,102,345,177,99,144,150,81	1031117,1037503,1038263,1041002,1046923,1047827,1048031,1051589,1052299	1031274,1037593,1038365,1041347,1047100,1047926,1048175,1051739,1052380	PREDICTED.72.7	chr1:1020661-1031117|chr1:1052380-1062855	0	0	0	0	0	0	1	0	1	0	0	0	0	0	0	0	0	0	0	0	0	0	0	0	0	0	0.990325	0	0	0	0	0	0
mmu_circ_000059	chr1_103118907_103138035_F	circRNA	Yes	chr1	103118907	103138035	+	807	19128	7	0,9027,10199,12149,17418,17912,19056	96,63,128,115,219,114,72	103118907,103127934,103129106,103131056,103136325,103136819,103137963	103119003,103127997,103129234,103131171,103136544,103136933,103138035	ENSMMUT00000006013	chr1:103105131-103118907|chr1:103138035-103145705	0	0	0	0	1	0	0	2	0	0	0	0	0	0	0	1	0	0	1	0	0	0	0	0	0.613597	0	0	0	0	0	0	0	0
mmu_circ_000062	chr1_103136325_103147083_F	circRNA	Yes	chr1	103136325	103147083	+	616	10758	5	0,494,1638,9380,10660	219,114,72,113,98	103136325,103136819,103137963,103145705,103146985	103136544,103136933,103138035,103145818,103147083	ENSMMUT00000006013	chr1:103131171-103136325|chr1:103147083-103149038	0	0	0	0	0	0	1	1	0	0	0	0	0	0	0	0	0	0	0	0	0	0	0	0	0	0	0.990325	0	0	0	0	0	0
mmu_circ_000063	chr1_103219775_103235673_R	circRNA	Yes*	chr1	103219775	103235673	-	1032	15898	7	0,2279,3400,5461,6206,7384,15705	140,153,146,137,157,106,193	103219775,103222054,103223175,103225236,103225981,103227159,103235480	103219915,103222207,103223321,103225373,103226138,103227265,103235673	PREDICTED.1317.2	chr1:103216820-103219775|chr1:103235673-103240070	0	0	0	0	0	0	0	0	0	0	0	0	0	0	0	0	0	0	0	0	0	1	0	0	0	0	0	0	0	0	0.430566	0	0
mmu_circ_000067	chr1_103223175_103227265_R	circRNA	Yes	chr1	103223175	103227265	-	546	4090	4	0,2061,2806,3984	146,137,157,106	103223175,103225236,103225981,103227159	103223321,103225373,103226138,103227265	ENSMMUT00000046596	chr1:103222207-103223175|chr1:103227265-103235480	3	1	0	0	0	0	1	3	0	0	0	0	0	0	5	1	2	1	1	0	1	0	0	0	0.613597	3.13487	0.990325	0	1.55173	0	0	0	0.705287
mmu_circ_000068	chr1_103223175_103235673_R	circRNA	Yes	chr1	103223175	103235673	-	739	12498	5	0,2061,2806,3984,12305	146,137,157,106,193	103223175,103225236,103225981,103227159,103235480	103223321,103225373,103226138,103227265,103235673	PREDICTED.2700.5	chr1:103222207-103223175|chr1:103235673-103247003	0	0	0	0	0	0	0	0	0	0	0	0	1	0	0	0	1	1	0	0	0	0	0	0	0	0	0	0.688568	0	0	0	0	0.705287
mmu_circ_000069	chr1_103223175_103240114_R	circRNA	Yes	chr1	103223175	103240114	-	783	16939	6	0,2061,2806,3984,12305,16895	146,137,157,106,193,44	103223175,103225236,103225981,103227159,103235480,103240070	103223321,103225373,103226138,103227265,103235673,103240114	PREDICTED.1954.1	chr1:103222207-103223175|chr1:103240114-103246982	0	0	0	0	0	0	0	0	0	0	0	0	0	0	2	0	0	0	0	0	0	0	0	0	0	0	0	0	0	0	0	0	0
mmu_circ_000072	chr1_103235480_103240114_R	circRNA	Yes	chr1	103235480	103240114	-	237	4634	2	0,4590	193,44	103235480,103240070	103235673,103240114	PREDICTED.2644.5	chr1:103227265-103235480|chr1:103240114-103246982	0	0	0	1	0	0	0	0	1	0	0	0	0	0	0	0	0	1	0	0	0	0	0	0	0	0	0	0	0	0	0	0	0.705287
mmu_circ_000078	chr1_103501295_103524459_F	circRNA	Yes	chr1	103501295	103524459	+	449	23164	4	0,2830,15288,22933	67,63,88,231	103501295,103504125,103516583,103524228	103501362,103504188,103516671,103524459	ENSMMUT00000008390	chr1:103485895-103501295|chr1:103524459-103529568	0	0	0	0	0	0	0	0	0	0	0	0	0	0	0	0	1	0	1	0	0	0	0	0	0.613597	0	0	0	0	0	0	0	0
mmu_circ_000080	chr1_103501295_103529707_F	circRNA	Yes	chr1	103501295	103529707	+	588	28412	5	0,2830,15288,22933,28273	67,63,88,231,139	103501295,103504125,103516583,103524228,103529568	103501362,103504188,103516671,103524459,103529707	ENSMMUT00000026853	chr1:103485895-103501295|chr1:103529707-103545174	0	0	0	0	0	0	2	0	0	0	0	0	0	0	0	0	0	0	0	0	0	0	0	0	0	0	1.98065	0	0	0	0	0	0
mmu_circ_000082	chr1_103555603_103560108_F	circRNA	Yes*	chr1	103555603	103560108	+	621	4505	4	0,1212,3336,4171	116,48,123,334	103555603,103556815,103558939,103559774	103555719,103556863,103559062,103560108	ENSMMUT00000026853	chr1:103545334-103555603|chr1:103560108-103578899	0	0	0	0	0	0	1	0	0	0	0	0	0	0	0	0	0	0	0	0	0	0	0	0	0	0	0.990325	0	0	0	0	0	0
mmu_circ_000086	chr1_103967276_103982863_F	circRNA	Yes*	chr1	103967276	103982863	+	668	15587	6	0,4228,5273,6838,11809,15451	114,88,135,144,51,136	103967276,103971504,103972549,103974114,103979085,103982727	103967390,103971592,103972684,103974258,103979136,103982863	PREDICTED.2956.1	chr1:103956703-103967276|chr1:103982863-104022222	0	0	0	0	0	0	1	0	0	0	0	0	0	0	0	0	0	0	0	0	0	0	0	0	0	0	0.990325	0	0	0	0	0	0
mmu_circ_000088	chr1_103974114_103982863_F	circRNA	Yes	chr1	103974114	103982863	+	331	8749	3	0,4971,8613	144,51,136	103974114,103979085,103982727	103974258,103979136,103982863	PREDICTED.2463.3	chr1:103972676-103974114|chr1:103982863-104022222	0	0	0	0	0	0	0	0	0	0	0	0	0	0	0	0	0	0	0	0	2	0	0	0	0	0	0	0	0	0	0	0	0
mmu_circ_000089	chr1_104022222_104026611_F	circRNA	Yes	chr1	104022222	104026611	+	241	4389	2	0,4239	91,150	104022222,104026461	104022313,104026611	ENSMMUT00000046575	chr1:103982863-104022222|chr1:104026611-104032442	0	0	0	0	0	0	1	1	0	0	0	0	0	0	0	1	0	0	0	0	0	0	0	0	0	0	0.990325	0	0	0	0	0	0
mmu_circ_000090	chr1_104053246_104062224_R	circRNA	Yes	chr1	104053246	104062224	-	265	8978	3	0,2514,8857	104,40,121	104053246,104055760,104062103	104053350,104055800,104062224	PREDICTED.2467.2	chr1:104051252-104053246|chr1:104062224-104074300	0	0	0	0	0	0	0	0	0	0	0	1	0	0	0	0	0	1	0	0	0	0	0	0	0	0	0	0	0	0	0	0	0.705287
mmu_circ_000091	chr1_104055760_104062224_R	circRNA	Yes	chr1	104055760	104062224	-	161	6464	2	0,6343	40,121	104055760,104062103	104055800,104062224	PREDICTED.2467.2	chr1:104053350-104055760|chr1:104062224-104074300	0	0	0	0	0	0	0	0	0	0	0	0	0	0	0	2	0	0	1	0	0	0	0	0	0.613597	0	0	0	0	0	0	0	0
mmu_circ_000093	chr1_1051589_1052380_R	circRNA	Yes*	chr1	1051589	1052380	-	231	791	2	0,710	150,81	1051589,1052299	1051739,1052380	PREDICTED.58.3	chr1:1048175-1051589|chr1:1052380-1062855	0	0	0	0	0	0	0	0	0	0	0	0	0	0	0	0	1	0	0	0	0	0	0	0	0	0	0	0	0	0	0	0	0
mmu_circ_000094	chr1_106060321_106068667_R	circRNA	Yes	chr1	106060321	106068667	-	545	8346	3	0,4057,8178	163,214,168	106060321,106064378,106068499	106060484,106064592,106068667	PREDICTED.2978.2	chr1:106022130-106060321|chr1:106068667-106094109	0	0	0	0	0	0	2	0	0	0	0	0	0	0	0	0	0	0	0	0	0	0	0	0	0	0	1.98065	0	0	0	0	0	0
mmu_circ_000097	chr1_106547584_106551870_F	circRNA	Yes*	chr1	106547584	106551870	+	1147	4286	7	0,559,1515,2162,3130,3969,4186	214,147,198,231,134,123,100	106547584,106548143,106549099,106549746,106550714,106551553,106551770	106547798,106548290,106549297,106549977,106550848,106551676,106551870	PREDICTED.1513.1	chr1:106538043-106547584|chr1:106551870-106554192	0	0	0	0	0	0	0	0	1	0	0	0	0	0	0	0	0	0	0	0	0	0	0	0	0	0	0	0	0	0	0	0	0
mmu_circ_000101	chr1_10807574_10808593_F	circRNA	Yes	chr1	10807574	10808593	+	211	1019	2	0,967	159,52	10807574,10808541	10807733,10808593	ENSMMUT00000026089	chr1:10804140-10807574|chr1:10808593-10818748	0	3	0	5	0	2	6	7	1	2	0	9	5	0	0	0	10	0	0	0	1	0	1	0	0	0	5.94195	3.44284	4.65518	0	0	0	0
mmu_circ_000103	chr1_10831278_10833327_F	circRNA	Yes	chr1	10831278	10833327	+	186	2049	2	0,1942	79,107	10831278,10833220	10831357,10833327	PREDICTED.344.3	chr1:10828852-10831278|chr1:10833327-10833884	0	0	0	0	1	0	2	0	1	0	0	0	0	0	0	0	0	0	0	0	1	0	0	0	0	0	1.98065	0	0	0	0	0	0
mmu_circ_000105	chr1_10865703_10867088_F	circRNA	Yes	chr1	10865703	10867088	+	332	1385	2	0,1234	181,151	10865703,10866937	10865884,10867088	PREDICTED.271.3	chr1:10860079-10865703|chr1:10867088-10872951	0	0	0	0	0	0	2	2	0	0	0	0	0	0	0	0	0	1	0	0	1	0	0	0	0	0	1.98065	0	0	0	0	0	0.705287
mmu_circ_000106	chr1_10998051_11006116_F	circRNA	Yes	chr1	10998051	11006116	+	220	8065	2	0,7978	133,87	10998051,11006029	10998184,11006116	PREDICTED.218.2	chr1:10994174-10998051|chr1:11006116-11014317	3	0	1	0	0	0	0	1	0	0	0	0	0	0	0	1	0	3	0	0	0	0	0	1	0	3.13487	0	0	0	0.993085	0	0.401374	2.11586
mmu_circ_000112	chr1_110659187_110683273_R	circRNA	Yes	chr1	110659187	110683273	-	1056	24086	11	0,494,2167,6406,8220,11621,16170,17572,19553,21855,23977	110,133,86,87,69,96,100,104,69,93,109	110659187,110659681,110661354,110665593,110667407,110670808,110675357,110676759,110678740,110681042,110683164	110659297,110659814,110661440,110665680,110667476,110670904,110675457,110676863,110678809,110681135,110683273	ENSMMUT00000046532	chr1:110607084-110659187|chr1:110683273-110687702	0	0	0	0	0	0	0	1	0	0	0	0	0	0	0	0	3	0	0	0	0	0	0	0	0	0	0	0	0	0	0	0	0
mmu_circ_000114	chr1_111071331_111094219_R	circRNA	Yes	chr1	111071331	111094219	-	639	22888	5	0,2507,4960,18893,22761	153,159,112,88,127	111071331,111073838,111076291,111090224,111094092	111071484,111073997,111076403,111090312,111094219	ENSMMUT00000003958	chr1:111067827-111071331|chr1:111094219-111100901	0	1	0	0	0	0	0	0	0	1	0	0	0	0	0	0	0	0	0	0	0	0	0	0	0	0	0	0	1.55173	0	0	0	0
mmu_circ_000115	chr1_111090224_111094219_R	circRNA	Yes	chr1	111090224	111094219	-	215	3995	2	0,3868	88,127	111090224,111094092	111090312,111094219	ENSMMUT00000003958	chr1:111076403-111090224|chr1:111094219-111100901	0	0	0	0	0	0	0	0	0	1	1	0	0	0	0	0	1	0	0	0	0	0	1	0	0	0	0	0	0	0	0	0	0
mmu_circ_000117	chr1_111749218_111766441_F	circRNA	Yes	chr1	111749218	111766441	+	544	17223	6	0,810,4414,6228,7699,17068	50,82,77,79,101,155	111749218,111750028,111753632,111755446,111756917,111766286	111749268,111750110,111753709,111755525,111757018,111766441	ENSMMUT00000014184	chr1:111740450-111749218|chr1:111766441-111771816	0	0	0	0	0	0	0	0	0	1	0	0	0	1	0	0	0	0	1	0	0	0	0	0	0.613597	0	0	0	0	0	0	0	0
mmu_circ_000118	chr1_111771816_111778531_F	circRNA	Yes	chr1	111771816	111778531	+	370	6715	4	0,2967,6430,6657	91,125,96,58	111771816,111774783,111778246,111778473	111771907,111774908,111778342,111778531	PREDICTED.2429.1	chr1:111766441-111771816|chr1:111778531-111783238	0	0	0	0	0	0	0	0	0	0	0	0	0	0	3	0	0	0	0	0	0	0	0	0	0	0	0	0	0	0	0	0	0
mmu_circ_000119	chr1_111778246_111784572_F	circRNA	Yes	chr1	111778246	111784572	+	301	6326	4	0,227,4992,6245	96,58,66,81	111778246,111778473,111783238,111784491	111778342,111778531,111783304,111784572	ENSMMUT00000014184	chr1:111774908-111778246|chr1:111784572-111785901	2	2	0	0	1	0	0	0	0	0	0	0	1	0	0	0	0	0	0	0	0	0	0	0	0	2.08991	0	0.688568	3.10345	0	0	0	0
mmu_circ_000120	chr1_111778246_111789983_F	circRNA	Yes	chr1	111778246	111789983	+	726	11737	8	0,227,4992,6245,7655,8040,9568,11651	96,58,66,81,139,107,93,86	111778246,111778473,111783238,111784491,111785901,111786286,111787814,111789897	111778342,111778531,111783304,111784572,111786040,111786393,111787907,111789983	ENSMMUT00000014184	chr1:111774908-111778246|chr1:111789983-111797051	0	0	0	0	0	0	0	0	0	1	0	0	1	0	0	0	0	0	0	0	0	0	0	0	0	0	0	0.688568	0	0	0	0	0
mmu_circ_000121	chr1_111778246_111797200_F	circRNA	Yes	chr1	111778246	111797200	+	875	18954	9	0,227,4992,6245,7655,8040,9568,11651,18805	96,58,66,81,139,107,93,86,149	111778246,111778473,111783238,111784491,111785901,111786286,111787814,111789897,111797051	111778342,111778531,111783304,111784572,111786040,111786393,111787907,111789983,111797200	ENSMMUT00000014184	chr1:111774908-111778246|chr1:111797200-111798127	0	0	0	0	0	0	1	0	0	0	0	0	0	0	0	1	0	0	0	0	0	0	0	0	0	0	0.990325	0	0	0	0	0	0
mmu_circ_000123	chr1_111787814_111797200_F	circRNA	Yes	chr1	111787814	111797200	+	328	9386	3	0,2083,9237	93,86,149	111787814,111789897,111797051	111787907,111789983,111797200	ENSMMUT00000014184	chr1:111786393-111787814|chr1:111797200-111798127	1	0	1	0	0	0	0	0	0	0	0	0	0	0	0	0	0	0	0	0	0	0	0	0	0	1.04496	0	0	0	0.993085	0	0	0
mmu_circ_000125	chr1_111959974_111964931_R	circRNA	Yes	chr1	111959974	111964931	-	702	4957	5	0,412,2300,4374,4735	147,98,94,141,222	111959974,111960386,111962274,111964348,111964709	111960121,111960484,111962368,111964489,111964931	ENSMMUT00000000566	chr1:111956554-111959974|chr1:111964931-111968434	1	1	0	1	0	0	0	2	0	0	0	0	0	0	3	0	0	2	0	0	1	0	0	0	0	1.04496	0	0	1.55173	0	0	0	1.41057
mmu_circ_000126	chr1_111964348_111964931_R	circRNA	Yes	chr1	111964348	111964931	-	363	583	2	0,361	141,222	111964348,111964709	111964489,111964931	ENSMMUT00000000566	chr1:111962368-111964348|chr1:111964931-111968434	0	0	0	0	0	0	0	2	1	0	0	0	0	5	5	0	0	0	1	0	2	0	0	1	0.613597	0	0	0	0	0	0	0.401374	0
mmu_circ_000127	chr1_111964709_111971286_R	circRNA	Yes	chr1	111964709	111971286	-	562	6577	4	0,3725,5952,6447	222,108,102,130	111964709,111968434,111970661,111971156	111964931,111968542,111970763,111971286	ENSMMUT00000046505	chr1:111964489-111964709|chr1:111971286-111985137	0	1	0	0	0	0	0	0	0	0	0	0	0	0	1	0	0	0	0	0	0	0	0	0	0	0	0	0	1.55173	0	0	0	0
mmu_circ_000128	chr1_111968434_111971286_R	circRNA	Yes	chr1	111968434	111971286	-	340	2852	3	0,2227,2722	108,102,130	111968434,111970661,111971156	111968542,111970763,111971286	ENSMMUT00000046505	chr1:111964931-111968434|chr1:111971286-111985137	0	0	1	0	0	0	0	2	0	1	0	0	0	0	2	0	0	1	0	0	0	0	0	0	0	0	0	0	0	0.993085	0	0	0.705287
mmu_circ_000132	chr1_112287236_112288139_F	circRNA	Yes	chr1	112287236	112288139	+	300	903	2	0,747	144,156	112287236,112287983	112287380,112288139	ENSMMUT00000030726	chr1:112285951-112287236|chr1:112288139-112291566	2	0	0	0	1	0	2	0	0	0	0	0	0	0	0	0	1	0	0	0	0	0	0	0	0	2.08991	1.98065	0	0	0	0	0	0
mmu_circ_000139	chr1_112392064_112426273_R	circRNA	Yes	chr1	112392064	112426273	-	1064	34209	10	0,4215,5494,9617,10751,14182,17921,19253,32028,34149	107,156,145,131,50,74,165,102,74,60	112392064,112396279,112397558,112401681,112402815,112406246,112409985,112411317,112424092,112426213	112392171,112396435,112397703,112401812,112402865,112406320,112410150,112411419,112424166,112426273	PREDICTED.2973.2	chr1:112383491-112392064|chr1:112426273-112454523	0	0	0	0	0	1	0	0	0	0	0	0	0	0	0	1	0	0	0	0	0	0	0	0	0	0	0	0	0	0	0	0	0
mmu_circ_000141	chr1_112401681_112406320_R	circRNA	Yes	chr1	112401681	112406320	-	255	4639	3	0,1134,4565	131,50,74	112401681,112402815,112406246	112401812,112402865,112406320	PREDICTED.2949.2	chr1:112397703-112401681|chr1:112406320-112409985	0	0	0	0	1	1	0	0	0	0	2	0	1	0	0	0	0	0	0	0	0	0	0	1	0	0	0	0.688568	0	0	0	0.401374	0
mmu_circ_000142	chr1_112406246_112411419_R	circRNA	Yes	chr1	112406246	112411419	-	341	5173	3	0,3739,5071	74,165,102	112406246,112409985,112411317	112406320,112410150,112411419	PREDICTED.2949.2	chr1:112402865-112406246|chr1:112411419-112424092	0	0	0	0	0	0	2	1	0	0	0	0	2	1	0	0	2	0	0	0	0	0	0	0	0	0	1.98065	1.37714	0	0	0	0	0
mmu_circ_000143	chr1_112406246_112426273_R	circRNA	Yes*	chr1	112406246	112426273	-	475	20027	5	0,3739,5071,17846,19967	74,165,102,74,60	112406246,112409985,112411317,112424092,112426213	112406320,112410150,112411419,112424166,112426273	PREDICTED.2949.2	chr1:112402865-112406246|chr1:112426273-112454523	0	0	0	0	1	0	0	0	0	0	0	0	0	0	0	0	0	0	0	0	0	0	0	0	0	0	0	0	0	0	0	0	0
mmu_circ_000144	chr1_112409985_112426273_R	circRNA	Yes	chr1	112409985	112426273	-	401	16288	4	0,1332,14107,16228	165,102,74,60	112409985,112411317,112424092,112426213	112410150,112411419,112424166,112426273	PREDICTED.2949.2	chr1:112406320-112409985|chr1:112426273-112454523	0	0	0	0	0	0	0	1	0	0	0	1	0	0	0	0	0	0	0	0	0	0	0	0	0	0	0	0	0	0	0	0	0
mmu_circ_000145	chr1_112467111_112468281_R	circRNA	Yes	chr1	112467111	112468281	-	190	1170	2	0,1067	87,103	112467111,112468178	112467198,112468281	ENSMMUT00000008148	chr1:112459379-112467111|chr1:112468281-112469341	0	1	4	6	5	0	0	8	0	0	0	2	2	6	8	2	3	4	1	2	1	0	0	3	0.613597	0	0	1.37714	1.55173	3.97234	0	1.20412	2.82115
mmu_circ_000147	chr1_112639689_112643046_F	circRNA	Yes*	chr1	112639689	112643046	+	287	3357	2	0,3228	158,129	112639689,112642917	112639847,112643046	ENSMMUT00000008155	chr1:112634558-112639689|chr1:112643046-112646700	0	0	0	0	0	0	0	0	0	0	0	0	1	0	0	0	0	0	0	0	0	0	0	0	0	0	0	0.688568	0	0	0	0	0
mmu_circ_000149	chr1_112690883_112691010_F	ciRNA	Yes	chr1	112690883	112691010	+	127	127	1	0	127	112690883	112691010	ENSMMUT00000008160	chr1:112690883-112691032	0	0	0	1	1	0	0	0	0	0	0	0	0	0	0	0	0	0	0	0	0	0	0	0	0	0	0	0	0	0	0	0	0
mmu_circ_000152	chr1_113289404_113292612_F	circRNA	Yes*	chr1	113289404	113292612	+	1141	3208	2	0,3004	937,204	113289404,113292408	113290341,113292612	PREDICTED.1428.1	chr1:113278602-113289404|chr1:113292612-113298546	0	0	0	0	0	0	0	1	0	0	0	0	0	0	0	0	0	0	0	0	0	0	0	0	0	0	0	0	0	0	0	0	0
mmu_circ_000156	chr1_11388178_11388427_R	ciRNA	Yes	chr1	11388178	11388427	-	249	249	1	0	249	11388178	11388427	ENSMMUT00000047610	chr1:11388154-11388427	0	0	0	2	0	0	0	1	0	0	1	1	0	1	2	0	2	1	0	0	0	0	0	1	0	0	0	0	0	0	0	0.401374	0.705287
mmu_circ_000158	chr1_114184840_114185252_F	circRNA	Yes*	chr1	114184840	114185252	+	412	412	1	0	412	114184840	114185252	ENSMMUT00000046412	chr1:114177429-114184840|chr1:114185252-114196978	0	0	0	0	0	0	0	0	0	0	0	0	0	0	0	1	0	0	0	0	0	0	0	0	0	0	0	0	0	0	0	0	0
mmu_circ_000159	chr1_114184840_114198902_F	circRNA	Yes*	chr1	114184840	114198902	+	702	14062	3	0,12138,13920	412,148,142	114184840,114196978,114198760	114185252,114197126,114198902	ENSMMUT00000046412	chr1:114177429-114184840|chr1:114198902-114212181	0	1	0	0	0	0	0	0	0	0	0	0	0	0	0	0	0	0	0	0	0	0	0	0	0	0	0	0	1.55173	0	0	0	0
mmu_circ_000161	chr1_114455672_114456336_F	circRNA	Yes	chr1	114455672	114456336	+	290	664	2	0,538	164,126	114455672,114456210	114455836,114456336	ENSMMUT00000004684	chr1:114453943-114455672|chr1:114456336-114459013	0	0	1	0	0	0	0	0	0	0	0	0	0	2	0	0	1	1	0	0	2	0	0	0	0	0	0	0	0	0.993085	0	0	0.705287
mmu_circ_000162	chr1_114698591_114705307_F	circRNA	Yes	chr1	114698591	114705307	+	210	6716	3	0,4558,6659	84,69,57	114698591,114703149,114705250	114698675,114703218,114705307	ENSMMUT00000020321	chr1:114634643-114698591|chr1:114705307-114710271	0	0	0	0	0	0	0	1	0	0	0	0	0	0	0	0	0	0	0	0	0	0	1	0	0	0	0	0	0	0	0	0	0
mmu_circ_000168	chr1_11517859_11579520_R	circRNA	Yes	chr1	11517859	11579520	-	582	61661	6	0,2361,11316,46221,60601,61555	100,125,49,105,97,106	11517859,11520220,11529175,11564080,11578460,11579414	11517959,11520345,11529224,11564185,11578557,11579520	ENSMMUT00000047610	chr1:11486142-11517859|chr1:11579520-11637686	0	0	0	0	0	0	1	1	0	0	0	0	1	0	0	0	1	0	0	0	0	0	0	0	0	0	0.990325	0.688568	0	0	0	0	0
mmu_circ_000170	chr1_115542708_115548390_R	circRNA	Yes*	chr1	115542708	115548390	-	244	5682	2	0,5531	93,151	115542708,115548239	115542801,115548390	ENSMMUT00000010877	chr1:115533684-115542708|chr1:115548390-115569585	0	0	0	0	0	0	1	0	0	0	0	0	0	0	0	0	0	0	0	0	0	0	0	0	0	0	0.990325	0	0	0	0	0	0
mmu_circ_000171	chr1_115542708_115584427_R	circRNA	Yes	chr1	115542708	115584427	-	867	41719	8	0,5531,26877,28207,31887,32269,33850,41640	93,151,103,73,115,98,155,79	115542708,115548239,115569585,115570915,115574595,115574977,115576558,115584348	115542801,115548390,115569688,115570988,115574710,115575075,115576713,115584427	ENSMMUT00000010878	chr1:115533684-115542708|chr1:115584427-115591314	0	0	0	0	0	0	0	0	0	0	0	0	0	0	1	0	0	1	0	0	0	0	0	0	0	0	0	0	0	0	0	0	0.705287
mmu_circ_000174	chr1_115548239_115593941_R	circRNA	Yes	chr1	115548239	115593941	-	945	45702	9	0,21346,22676,26356,26738,28319,36109,43075,45647	151,103,73,115,98,155,79,116,55	115548239,115569585,115570915,115574595,115574977,115576558,115584348,115591314,115593886	115548390,115569688,115570988,115574710,115575075,115576713,115584427,115591430,115593941	ENSMMUT00000010878	chr1:115542801-115548239|chr1:115593941-115603585	0	0	0	0	1	0	1	0	0	0	0	0	0	0	0	0	0	0	0	0	0	0	0	0	0	0	0.990325	0	0	0	0	0	0
mmu_circ_000176	chr1_115548239_115603748_R	circRNA	Yes	chr1	115548239	115603748	-	1108	55509	10	0,21346,22676,26356,26738,28319,36109,43075,45647,55346	151,103,73,115,98,155,79,116,55,163	115548239,115569585,115570915,115574595,115574977,115576558,115584348,115591314,115593886,115603585	115548390,115569688,115570988,115574710,115575075,115576713,115584427,115591430,115593941,115603748	ENSMMUT00000046360	chr1:115533684-115548239|chr1:115603748-115609865	0	0	2	1	0	0	0	0	0	0	0	0	0	0	0	0	0	0	0	0	0	0	0	0	0	0	0	0	0	1.98617	0	0	0
mmu_circ_000177	chr1_115548239_115609948_R	circRNA	Yes	chr1	115548239	115609948	-	900	61709	8	0,26738,28319,36109,43075,45647,55346,61626	151,98,155,79,116,55,163,83	115548239,115574977,115576558,115584348,115591314,115593886,115603585,115609865	115548390,115575075,115576713,115584427,115591430,115593941,115603748,115609948	PREDICTED.4534.3	chr1:115533684-115548239|chr1:115609948-115612127	0	0	0	0	0	0	0	0	0	0	3	0	0	0	0	0	0	0	0	0	0	0	0	0	0	0	0	0	0	0	0	0	0
mmu_circ_000178	chr1_115548239_115609948_R	circRNA	Yes	chr1	115548239	115609948	-	1191	61709	11	0,21346,22676,26356,26738,28319,36109,43075,45647,55346,61626	151,103,73,115,98,155,79,116,55,163,83	115548239,115569585,115570915,115574595,115574977,115576558,115584348,115591314,115593886,115603585,115609865	115548390,115569688,115570988,115574710,115575075,115576713,115584427,115591430,115593941,115603748,115609948	ENSMMUT00000046365	chr1:115542801-115548239|chr1:115609948-115612252	1	0	0	1	0	1	0	1	0	0	0	0	1	0	0	1	0	0	0	0	1	0	0	0	0	1.04496	0	0.688568	0	0	0	0	0
mmu_circ_000181	chr1_115569585_115576713_R	circRNA	Yes	chr1	115569585	115576713	-	544	7128	5	0,1330,5010,5392,6973	103,73,115,98,155	115569585,115570915,115574595,115574977,115576558	115569688,115570988,115574710,115575075,115576713	ENSMMUT00000046360	chr1:115548390-115569585|chr1:115576713-115584348	0	0	0	0	1	1	0	0	1	0	0	0	0	0	1	0	0	0	0	0	0	0	0	0	0	0	0	0	0	0	0	0	0
mmu_circ_000182	chr1_115569585_115591430_R	circRNA	Yes	chr1	115569585	115591430	-	739	21845	7	0,1330,5010,5392,6973,14763,21729	103,73,115,98,155,79,116	115569585,115570915,115574595,115574977,115576558,115584348,115591314	115569688,115570988,115574710,115575075,115576713,115584427,115591430	ENSMMUT00000046365	chr1:115548390-115569585|chr1:115591430-115593886	0	1	0	1	0	0	0	1	0	0	0	0	0	0	0	1	0	0	0	0	0	0	0	0	0	0	0	0	1.55173	0	0	0	0
mmu_circ_000183	chr1_115569585_115603748_R	circRNA	Yes	chr1	115569585	115603748	-	957	34163	9	0,1330,5010,5392,6973,14763,21729,24301,34000	103,73,115,98,155,79,116,55,163	115569585,115570915,115574595,115574977,115576558,115584348,115591314,115593886,115603585	115569688,115570988,115574710,115575075,115576713,115584427,115591430,115593941,115603748	ENSMMUT00000046360	chr1:115548390-115569585|chr1:115603748-115609865	1	0	0	0	0	0	0	0	2	0	0	0	1	0	0	0	0	0	0	0	0	0	0	0	0	1.04496	0	0.688568	0	0	0	0	0
mmu_circ_000184	chr1_115569585_115609948_R	circRNA	Yes	chr1	115569585	115609948	-	1040	40363	10	0,1330,5010,5392,6973,14763,21729,24301,34000,40280	103,73,115,98,155,79,116,55,163,83	115569585,115570915,115574595,115574977,115576558,115584348,115591314,115593886,115603585,115609865	115569688,115570988,115574710,115575075,115576713,115584427,115591430,115593941,115603748,115609948	ENSMMUT00000046360	chr1:115548390-115569585|chr1:115609948-115611349	0	0	0	0	0	0	0	2	0	0	0	0	0	0	1	0	0	0	0	0	0	0	0	0	0	0	0	0	0	0	0	0	0
mmu_circ_000187	chr1_115574595_115576713_R	circRNA	Yes	chr1	115574595	115576713	-	368	2118	3	0,382,1963	115,98,155	115574595,115574977,115576558	115574710,115575075,115576713	ENSMMUT00000010878	chr1:115570988-115574595|chr1:115576713-115584348	0	0	1	0	0	0	1	0	0	0	0	0	0	0	0	0	0	0	0	0	0	0	0	0	0	0	0.990325	0	0	0.993085	0	0	0
mmu_circ_000189	chr1_115574595_115591430_R	circRNA	Yes	chr1	115574595	115591430	-	563	16835	5	0,382,1963,9753,16719	115,98,155,79,116	115574595,115574977,115576558,115584348,115591314	115574710,115575075,115576713,115584427,115591430	ENSMMUT00000046365	chr1:115570988-115574595|chr1:115591430-115593886	0	0	0	0	0	0	0	0	0	0	0	0	0	0	3	1	0	1	1	0	0	0	0	0	0.613597	0	0	0	0	0	0	0	0.705287
mmu_circ_000190	chr1_115574595_115603748_R	circRNA	Yes	chr1	115574595	115603748	-	610	29153	5	0,382,1963,9753,28990	115,98,155,79,163	115574595,115574977,115576558,115584348,115603585	115574710,115575075,115576713,115584427,115603748	PREDICTED.1747.2	chr1:115570988-115574595|chr1:115603748-115609865	0	0	0	0	0	0	0	0	0	0	0	0	0	0	0	0	0	0	0	3	0	0	0	0	0	0	0	0	0	0	0	0	0
mmu_circ_000192	chr1_115574595_115609948_R	circRNA	Yes	chr1	115574595	115609948	-	864	35353	8	0,382,1963,9753,16719,19291,28990,35270	115,98,155,79,116,55,163,83	115574595,115574977,115576558,115584348,115591314,115593886,115603585,115609865	115574710,115575075,115576713,115584427,115591430,115593941,115603748,115609948	PREDICTED.1845.5	chr1:115570988-115574595|chr1:115609948-115612127	0	0	0	0	0	0	0	0	0	0	0	0	0	0	0	0	0	0	2	0	0	0	0	0	1.22719	0	0	0	0	0	0	0	0
mmu_circ_000193	chr1_115584348_115603748_R	circRNA	Yes	chr1	115584348	115603748	-	413	19400	4	0,6966,9538,19237	79,116,55,163	115584348,115591314,115593886,115603585	115584427,115591430,115593941,115603748	ENSMMUT00000046360	chr1:115576713-115584348|chr1:115603748-115609865	0	0	0	1	0	1	0	0	0	0	0	0	3	0	1	0	0	2	0	0	0	0	0	0	0	0	0	2.0657	0	0	0	0	1.41057
mmu_circ_000194	chr1_115584348_115609948_R	circRNA	Yes*	chr1	115584348	115609948	-	496	25600	5	0,6966,9538,19237,25517	79,116,55,163,83	115584348,115591314,115593886,115603585,115609865	115584427,115591430,115593941,115603748,115609948	PREDICTED.1845.8	chr1:115576713-115584348|chr1:115609948-115611349	0	0	0	0	0	0	0	0	1	0	0	0	0	0	0	0	0	0	0	0	0	0	0	0	0	0	0	0	0	0	0	0	0
mmu_circ_000195	chr1_115591314_115593941_R	circRNA	Yes	chr1	115591314	115593941	-	171	2627	2	0,2572	116,55	115591314,115593886	115591430,115593941	PREDICTED.3064.8	chr1:115589989-115591314|chr1:115593941-115603585	0	0	0	0	0	0	0	0	0	0	0	0	0	1	0	0	1	0	0	0	0	0	0	0	0	0	0	0	0	0	0	0	0
mmu_circ_000197	chr1_115591314_115603748_R	circRNA	Yes	chr1	115591314	115603748	-	334	12434	3	0,2572,12271	116,55,163	115591314,115593886,115603585	115591430,115593941,115603748	ENSMMUT00000046360	chr1:115584427-115591314|chr1:115603748-115609865	1	0	2	1	0	0	0	0	0	0	0	0	0	0	0	0	2	3	0	0	0	0	0	1	0	1.04496	0	0	0	1.98617	0	0.401374	2.11586
mmu_circ_000198	chr1_115591314_115609948_R	circRNA	Yes	chr1	115591314	115609948	-	417	18634	4	0,2572,12271,18551	116,55,163,83	115591314,115593886,115603585,115609865	115591430,115593941,115603748,115609948	ENSMMUT00000046365	chr1:115584427-115591314|chr1:115609948-115612252	3	0	0	1	1	0	0	1	0	0	0	0	0	2	4	0	8	4	2	0	1	0	1	0	1.22719	3.13487	0	0	0	0	0	0	2.82115
mmu_circ_000199	chr1_115593886_115603748_R	circRNA	Yes	chr1	115593886	115603748	-	218	9862	2	0,9699	55,163	115593886,115603585	115593941,115603748	ENSMMUT00000046365	chr1:115591430-115593886|chr1:115603748-115609865	5	0	0	0	3	0	4	3	6	0	1	0	7	0	9	2	4	5	4	0	0	1	0	0	2.45439	5.22478	3.9613	4.81997	0	0	0.430566	0	3.52644
mmu_circ_000200	chr1_115593886_115609948_R	circRNA	Yes	chr1	115593886	115609948	-	301	16062	3	0,9699,15979	55,163,83	115593886,115603585,115609865	115593941,115603748,115609948	ENSMMUT00000010878	chr1:115591430-115593886|chr1:115609948-115612252	0	0	0	0	1	0	1	0	0	0	0	0	0	0	0	0	0	0	0	0	0	0	0	0	0	0	0.990325	0	0	0	0	0	0
mmu_circ_000201	chr1_115603585_115603748_R	circRNA	Yes	chr1	115603585	115603748	-	163	163	1	0	163	115603585	115603748	ENSMMUT00000046360	chr1:115593941-115603585|chr1:115603748-115609865	0	0	0	0	0	0	1	0	0	0	0	0	0	0	1	0	0	0	0	0	0	0	0	0	0	0	0.990325	0	0	0	0	0	0
mmu_circ_000202	chr1_115603585_115609948_R	circRNA	Yes	chr1	115603585	115609948	-	246	6363	2	0,6280	163,83	115603585,115609865	115603748,115609948	ENSMMUT00000046365	chr1:115593941-115603585|chr1:115609948-115612252	3	0	2	1	2	0	5	4	0	0	0	0	1	4	3	2	7	3	1	1	0	0	0	0	0.613597	3.13487	4.95162	0.688568	0	1.98617	0	0	2.11586
mmu_circ_000204	chr1_11564080_11579520_R	circRNA	Yes	chr1	11564080	11579520	-	308	15440	3	0,14380,15334	105,97,106	11564080,11578460,11579414	11564185,11578557,11579520	ENSMMUT00000047610	chr1:11529224-11564080|chr1:11579520-11637686	10	0	3	2	4	2	4	5	4	0	0	1	2	3	13	2	4	4	3	3	1	0	0	0	1.84079	10.4496	3.9613	1.37714	0	2.97926	0	0	2.82115
mmu_circ_000205	chr1_11564080_11637812_R	circRNA	Yes	chr1	11564080	11637812	-	434	73732	4	0,14380,15334,73606	105,97,106,126	11564080,11578460,11579414,11637686	11564185,11578557,11579520,11637812	ENSMMUT00000047610	chr1:11529224-11564080|chr1:11637812-11648089	9	0	2	0	2	3	2	0	3	0	0	0	0	0	4	2	5	1	4	0	3	0	0	0	2.45439	9.4046	1.98065	0	0	1.98617	0	0	0.705287
mmu_circ_000206	chr1_11564080_11648160_R	circRNA	Yes	chr1	11564080	11648160	-	505	84080	5	0,14380,15334,73606,84009	105,97,106,126,71	11564080,11578460,11579414,11637686,11648089	11564185,11578557,11579520,11637812,11648160	ENSMMUT00000047608	chr1:11529224-11564080|chr1:11648160-11679776	0	0	0	0	0	0	0	0	1	0	0	0	0	0	0	0	1	0	0	0	0	0	0	0	0	0	0	0	0	0	0	0	0
mmu_circ_000207	chr1_115644628_115650882_F	circRNA	Yes	chr1	115644628	115650882	+	430	6254	4	0,851,5483,6175	64,207,80,79	115644628,115645479,115650111,115650803	115644692,115645686,115650191,115650882	PREDICTED.3065.1	chr1:115640633-115644628|chr1:115650882-115656744	5	0	0	0	0	0	0	0	3	0	0	4	0	0	3	0	5	0	0	2	0	0	0	0	0	5.22478	0	0	0	0	0	0	0
mmu_circ_000210	chr1_116087968_116089310_F	circRNA	Yes	chr1	116087968	116089310	+	498	1342	4	0,234,925,1198	75,135,144,144	116087968,116088202,116088893,116089166	116088043,116088337,116089037,116089310	ENSMMUT00000026841	chr1:116085449-116087968|chr1:116089310-116090426	0	0	0	0	0	0	2	1	0	0	0	0	0	0	0	0	1	0	2	0	0	0	0	0	1.22719	0	1.98065	0	0	0	0	0	0
mmu_circ_000211	chr1_116111067_116111517_F	circRNA	Yes*	chr1	116111067	116111517	+	450	450	1	0	450	116111067	116111517	ENSMMUT00000026841	chr1:116109458-116111067|chr1:116111517-116113155	0	0	0	0	0	0	0	0	0	0	0	0	0	0	0	0	0	1	0	0	0	0	0	0	0	0	0	0	0	0	0	0	0.705287
mmu_circ_000212	chr1_11637686_11680245_R	circRNA	Yes	chr1	11637686	11680245	-	666	42559	3	0,10403,42090	126,71,469	11637686,11648089,11679776	11637812,11648160,11680245	ENSMMUT00000047608	chr1:11579520-11637686|chr1:11680245-11778785	0	0	0	0	0	0	0	0	0	0	0	0	0	0	0	0	2	0	0	0	0	0	0	0	0	0	0	0	0	0	0	0	0
mmu_circ_000213	chr1_11648089_11680245_R	circRNA	Yes	chr1	11648089	11680245	-	540	32156	2	0,31687	71,469	11648089,11679776	11648160,11680245	ENSMMUT00000047610	chr1:11637812-11648089|chr1:11680245-11820105	0	0	0	0	0	0	0	0	0	0	0	0	1	0	1	0	0	0	0	0	0	0	0	0	0	0	0	0.688568	0	0	0	0	0
mmu_circ_000217	chr1_116694471_116697685_R	circRNA	Yes	chr1	116694471	116697685	-	646	3214	4	0,1814,2008,3054	222,90,174,160	116694471,116696285,116696479,116697525	116694693,116696375,116696653,116697685	PREDICTED.5074.2	chr1:116690939-116694471|chr1:116697685-116708951	0	0	0	0	1	0	0	0	0	0	0	0	0	0	0	1	0	0	0	0	0	0	0	0	0	0	0	0	0	0	0	0	0
mmu_circ_000220	chr1_116722949_116723651_R	circRNA	Yes	chr1	116722949	116723651	-	229	702	2	0,632	159,70	116722949,116723581	116723108,116723651	PREDICTED.5074.2	chr1:116710771-116722949|chr1:116723651-116741709	1	0	0	2	3	1	0	0	0	0	0	0	1	2	0	0	2	0	0	0	0	0	0	0	0	1.04496	0	0.688568	0	0	0	0	0
mmu_circ_000222	chr1_11679776_11680245_R	circRNA	Yes	chr1	11679776	11680245	-	469	469	1	0	469	11679776	11680245	ENSMMUT00000047610	chr1:11648160-11679776|chr1:11680245-11820105	2	1	0	0	0	0	0	0	0	0	0	0	0	0	0	0	0	0	0	0	0	0	0	0	0	2.08991	0	0	1.55173	0	0	0	0
mmu_circ_000224	chr1_116902886_116904055_F	circRNA	Yes	chr1	116902886	116904055	+	349	1169	2	0,986	166,183	116902886,116903872	116903052,116904055	ENSMMUT00000027430	chr1:116901679-116902886|chr1:116904055-116906946	1	0	0	0	0	0	0	0	0	0	0	0	0	0	1	0	2	0	0	0	0	0	0	0	0	1.04496	0	0	0	0	0	0	0
mmu_circ_000225	chr1_116939194_116940272_F	circRNA	Yes	chr1	116939194	116940272	+	1078	1078	1	0	1078	116939194	116940272	ENSMMUT00000046327	chr1:116928004-116939194|chr1:116940272-116951705	0	0	0	2	0	0	0	0	0	0	0	0	0	0	0	0	0	0	0	0	0	0	0	0	0	0	0	0	0	0	0	0	0
mmu_circ_000228	chr1_117409853_117410054_R	circRNA	Yes	chr1	117409853	117410054	-	201	201	1	0	201	117409853	117410054	PREDICTED.1684.1	chr1:117398424-117409853|chr1:117410054-117412958	0	0	0	0	1	0	1	0	0	0	0	0	0	0	0	0	0	0	0	0	0	0	0	0	0	0	0.990325	0	0	0	0	0	0
mmu_circ_000230	chr1_117449388_117450667_R	circRNA	Yes	chr1	117449388	117450667	-	397	1279	3	0,300,1160	133,145,119	117449388,117449688,117450548	117449521,117449833,117450667	PREDICTED.3055.3	chr1:117421999-117449388|chr1:117450667-117502071	1	0	0	3	1	1	3	4	1	0	0	1	1	2	9	2	4	2	2	0	0	0	0	0	1.22719	1.04496	2.97097	0.688568	0	0	0	0	1.41057
mmu_circ_000232	chr1_117620576_117622337_R	circRNA	Yes	chr1	117620576	117622337	-	421	1761	3	0,1101,1624	171,113,137	117620576,117621677,117622200	117620747,117621790,117622337	ENSMMUT00000046309	chr1:117615858-117620576|chr1:117622337-117623857	0	0	0	0	0	0	0	0	0	0	0	0	0	0	0	0	0	0	0	0	1	0	0	1	0	0	0	0	0	0	0	0.401374	0
mmu_circ_000236	chr1_117677110_117677369_R	ciRNA	Yes	chr1	117677110	117677369	-	259	259	1	0	259	117677110	117677369	ENSMMUT00000002802	chr1:117677078-117677369	0	0	0	0	0	0	0	1	0	0	0	0	0	0	1	0	0	1	0	0	0	0	0	0	0	0	0	0	0	0	0	0	0.705287
mmu_circ_000237	chr1_117683545_117688753_R	circRNA	Yes	chr1	117683545	117688753	-	513	5208	3	0,2850,5027	166,166,181	117683545,117686395,117688572	117683711,117686561,117688753	ENSMMUT00000002802	chr1:117679494-117683545|chr1:117688753-117694943	0	0	0	0	0	0	0	2	1	0	0	0	1	0	1	0	0	3	1	0	0	0	0	0	0.613597	0	0	0.688568	0	0	0	0	2.11586
mmu_circ_000238	chr1_117688572_117688753_R	circRNA	Yes	chr1	117688572	117688753	-	181	181	1	0	181	117688572	117688753	ENSMMUT00000002802	chr1:117686561-117688572|chr1:117688753-117694943	0	0	0	1	0	1	0	0	0	0	0	0	0	0	0	0	0	0	0	0	0	0	1	0	0	0	0	0	0	0	0	0	0
mmu_circ_000241	chr1_117717743_117718908_R	circRNA	Yes	chr1	117717743	117718908	-	343	1165	2	0,986	164,179	117717743,117718729	117717907,117718908	ENSMMUT00000002788	chr1:117716883-117717743|chr1:117718908-117721770	0	0	0	0	0	0	0	0	0	0	0	1	0	0	1	0	0	0	0	0	0	0	0	0	0	0	0	0	0	0	0	0	0
mmu_circ_000242	chr1_117717743_117723226_R	circRNA	Yes	chr1	117717743	117723226	-	576	5483	4	0,986,4027,5370	164,179,120,113	117717743,117718729,117721770,117723113	117717907,117718908,117721890,117723226	ENSMMUT00000002788	chr1:117716883-117717743|chr1:117723226-117724114	0	0	0	0	0	0	0	0	0	0	2	0	0	0	0	1	0	0	0	0	0	0	0	0	0	0	0	0	0	0	0	0	0
mmu_circ_000246	chr1_117728150_117747926_R	circRNA	Yes	chr1	117728150	117747926	-	1796	19776	11	0,251,2348,3525,3778,4231,6491,7700,9117,11244,19390	165,141,213,126,129,82,98,110,199,147,386	117728150,117728401,117730498,117731675,117731928,117732381,117734641,117735850,117737267,117739394,117747540	117728315,117728542,117730711,117731801,117732057,117732463,117734739,117735960,117737466,117739541,117747926	PREDICTED.2913.1	chr1:117724995-117728150|chr1:117747926-117755642	0	0	0	0	0	2	0	0	0	0	0	0	0	0	0	0	0	0	0	0	0	0	0	1	0	0	0	0	0	0	0	0.401374	0
mmu_circ_000247	chr1_117730498_117739541_R	circRNA	Yes	chr1	117730498	117739541	-	1104	9043	8	0,1177,1430,1883,4143,5352,6769,8896	213,126,129,82,98,110,199,147	117730498,117731675,117731928,117732381,117734641,117735850,117737267,117739394	117730711,117731801,117732057,117732463,117734739,117735960,117737466,117739541	PREDICTED.2913.1	chr1:117728542-117730498|chr1:117739541-117747540	0	0	0	1	0	0	0	0	0	0	0	0	1	0	0	0	1	0	0	0	0	0	0	0	0	0	0	0.688568	0	0	0	0	0
mmu_circ_000249	chr1_117731675_117735960_R	circRNA	Yes	chr1	117731675	117735960	-	545	4285	5	0,253,706,2966,4175	126,129,82,98,110	117731675,117731928,117732381,117734641,117735850	117731801,117732057,117732463,117734739,117735960	PREDICTED.2913.1	chr1:117730711-117731675|chr1:117735960-117737267	0	0	0	0	0	0	0	0	0	1	0	0	0	0	0	0	0	0	0	2	0	0	0	0	0	0	0	0	0	0	0	0	0
mmu_circ_000252	chr1_117737267_117739541_R	circRNA	Yes	chr1	117737267	117739541	-	346	2274	2	0,2127	199,147	117737267,117739394	117737466,117739541	ENSMMUT00000002788	chr1:117735960-117737267|chr1:117739541-117747540	0	0	0	2	1	0	1	0	0	0	0	0	1	0	0	0	1	0	0	0	3	0	0	0	0	0	0.990325	0.688568	0	0	0	0	0
mmu_circ_000253	chr1_11905267_11906234_R	circRNA	Yes	chr1	11905267	11906234	-	357	967	2	0,833	223,134	11905267,11906100	11905490,11906234	ENSMMUT00000032304	chr1:11904502-11905267|chr1:11906234-11907117	1	0	0	0	0	0	0	1	0	0	0	0	0	0	1	0	0	0	0	0	1	0	0	0	0	1.04496	0	0	0	0	0	0	0
mmu_circ_000255	chr1_120368309_120371781_F	circRNA	Yes	chr1	120368309	120371781	+	353	3472	2	0,3375	256,97	120368309,120371684	120368565,120371781	PREDICTED.3070.1	chr1:120340256-120368309|chr1:120371781-120380941	0	0	0	0	0	1	4	0	0	0	0	0	0	3	0	0	7	0	3	0	0	0	0	0	1.84079	0	3.9613	0	0	0	0	0	0
mmu_circ_000256	chr1_120368309_120381060_F	circRNA	Yes	chr1	120368309	120381060	+	472	12751	3	0,3375,12632	256,97,119	120368309,120371684,120380941	120368565,120371781,120381060	PREDICTED.3070.1	chr1:120340256-120368309|chr1:120381060-120386787	0	0	0	0	0	2	0	0	0	0	0	0	0	1	0	0	2	0	0	0	0	0	0	0	0	0	0	0	0	0	0	0	0
mmu_circ_000257	chr1_120368309_120381060_F	circRNA	Yes	chr1	120368309	120381060	+	472	12751	3	0,3375,12636	256,101,115	120368309,120371684,120380945	120368565,120371785,120381060	PREDICTED.4460.2	chr1:120340256-120368309|chr1:120381060-120386787	3	0	0	2	0	0	0	1	0	2	0	1	2	0	2	4	0	1	0	0	0	0	0	1	0	3.13487	0	1.37714	0	0	0	0.401374	0.705287
mmu_circ_000258	chr1_120368309_120386868_F	circRNA	Yes	chr1	120368309	120386868	+	553	18559	4	0,3375,12632,18478	256,97,119,81	120368309,120371684,120380941,120386787	120368565,120371781,120381060,120386868	PREDICTED.3070.1	chr1:120340256-120368309|chr1:120386868-120407067	0	0	0	0	0	0	0	0	0	0	0	0	0	1	0	0	9	0	5	0	0	0	0	0	3.06799	0	0	0	0	0	0	0	0
mmu_circ_000259	chr1_120368309_120386868_F	circRNA	Yes	chr1	120368309	120386868	+	553	18559	4	0,3375,12636,18478	256,101,115,81	120368309,120371684,120380945,120386787	120368565,120371785,120381060,120386868	PREDICTED.4460.2	chr1:120340256-120368309|chr1:120386868-120407067	6	0	0	1	1	0	4	0	3	0	1	2	5	0	5	2	0	5	0	0	0	1	0	1	0	6.26973	3.9613	3.44284	0	0	0.430566	0.401374	3.52644
mmu_circ_000260	chr1_120368309_120407162_F	circRNA	Yes	chr1	120368309	120407162	+	648	38853	5	0,3375,12632,18478,38758	256,97,119,81,95	120368309,120371684,120380941,120386787,120407067	120368565,120371781,120381060,120386868,120407162	PREDICTED.3070.1	chr1:120340256-120368309|chr1:120407162-120425792	0	0	0	0	0	0	0	0	0	0	0	0	0	0	0	0	2	0	0	0	0	0	0	0	0	0	0	0	0	0	0	0	0
mmu_circ_000261	chr1_120368309_120407162_F	circRNA	Yes	chr1	120368309	120407162	+	648	38853	5	0,3375,12636,18478,38758	256,101,115,81,95	120368309,120371684,120380945,120386787,120407067	120368565,120371785,120381060,120386868,120407162	PREDICTED.4460.2	chr1:120340256-120368309|chr1:120407162-120425792	1	1	0	0	0	0	1	0	0	1	0	0	0	0	2	0	0	1	0	1	2	0	0	0	0	1.04496	0.990325	0	1.55173	0	0	0	0.705287
mmu_circ_000262	chr1_120368309_120431644_F	circRNA	Yes	chr1	120368309	120431644	+	866	63335	7	0,3375,12636,18478,38758,57483,63241	256,101,115,81,95,124,94	120368309,120371684,120380945,120386787,120407067,120425792,120431550	120368565,120371785,120381060,120386868,120407162,120425916,120431644	PREDICTED.1983.2	chr1:120340256-120368309|chr1:120431644-120437658	0	1	0	0	0	0	0	0	0	0	0	0	0	0	0	0	0	1	0	0	0	0	0	0	0	0	0	0	1.55173	0	0	0	0.705287
mmu_circ_000264	chr1_120425792_120431644_F	circRNA	Yes	chr1	120425792	120431644	+	218	5852	2	0,5758	124,94	120425792,120431550	120425916,120431644	ENSMMUT00000030510	chr1:120407162-120425792|chr1:120431644-120466394	1	1	0	0	0	1	0	2	0	0	0	1	0	0	2	1	0	0	0	0	0	1	0	0	0	1.04496	0	0	1.55173	0	0.430566	0	0
mmu_circ_000265	chr1_120425792_120476238_F	circRNA	Yes*	chr1	120425792	120476238	+	843	50446	6	0,5758,40602,44131,46842,50330	124,94,116,220,173,116	120425792,120431550,120466394,120469923,120472634,120476122	120425916,120431644,120466510,120470143,120472807,120476238	PREDICTED.1468.3	chr1:120407162-120425792|chr1:120476238-120488301	1	0	0	0	0	0	0	0	0	0	0	0	0	0	0	0	0	0	0	0	0	0	0	0	0	1.04496	0	0	0	0	0	0	0
mmu_circ_000266	chr1_120466394_120476238_F	circRNA	Yes	chr1	120466394	120476238	+	625	9844	4	0,3529,6240,9728	116,220,173,116	120466394,120469923,120472634,120476122	120466510,120470143,120472807,120476238	ENSMMUT00000030511	chr1:120431644-120466394|chr1:120476238-120496464	0	0	0	0	0	0	0	0	0	0	0	0	0	1	0	1	0	0	0	0	0	0	0	0	0	0	0	0	0	0	0	0	0
mmu_circ_000269	chr1_12110400_12123428_R	circRNA	Yes*	chr1	12110400	12123428	-	354	13028	3	0,700,12934	161,99,94	12110400,12111100,12123334	12110561,12111199,12123428	PREDICTED.311.1	chr1:12100384-12110400|chr1:12123428-12123531	0	0	0	1	0	0	0	0	0	0	0	0	0	0	0	0	0	0	0	0	0	0	0	0	0	0	0	0	0	0	0	0	0
mmu_circ_000272	chr1_121827141_121846742_R	circRNA	Yes	chr1	121827141	121846742	-	721	19601	5	0,10531,11747,13601,19387	65,168,172,102,214	121827141,121837672,121838888,121840742,121846528	121827206,121837840,121839060,121840844,121846742	PREDICTED.1444.1	chr1:121812179-121827141|chr1:121846742-121859456	0	0	0	0	1	0	1	0	0	0	0	0	0	0	0	0	0	0	0	0	0	0	0	0	0	0	0.990325	0	0	0	0	0	0
mmu_circ_000273	chr1_121837672_121840844_R	circRNA	Yes*	chr1	121837672	121840844	-	442	3172	3	0,1216,3070	168,172,102	121837672,121838888,121840742	121837840,121839060,121840844	PREDICTED.1851.1	chr1:121827206-121837672|chr1:121840844-121846528	0	0	0	0	0	0	0	0	0	0	0	0	0	0	1	0	0	0	0	0	0	0	0	0	0	0	0	0	0	0	0	0	0
mmu_circ_000274	chr1_121837672_121846742_R	circRNA	Yes*	chr1	121837672	121846742	-	656	9070	4	0,1216,3070,8856	168,172,102,214	121837672,121838888,121840742,121846528	121837840,121839060,121840844,121846742	PREDICTED.1444.1	chr1:121827206-121837672|chr1:121846742-121859456	0	0	1	0	0	0	0	0	0	0	0	0	0	0	0	0	0	0	0	0	0	0	0	0	0	0	0	0	0	0.993085	0	0	0
mmu_circ_000278	chr1_123240890_123252340_F	circRNA	Yes	chr1	123240890	123252340	+	495	11450	4	0,4800,5113,11332	77,124,176,118	123240890,123245690,123246003,123252222	123240967,123245814,123246179,123252340	PREDICTED.3072.2	chr1:123202192-123240890|chr1:123252340-123276502	0	0	0	2	0	0	0	0	0	0	0	0	1	0	0	2	1	0	0	0	0	0	0	0	0	0	0	0.688568	0	0	0	0	0
mmu_circ_000280	chr1_123277688_123278488_F	circRNA	Yes	chr1	123277688	123278488	+	426	800	3	0,355,587	120,93,213	123277688,123278043,123278275	123277808,123278136,123278488	PREDICTED.3072.2	chr1:123276634-123277688|chr1:123278488-123281221	2	0	0	0	0	0	0	0	0	0	0	0	0	0	0	0	0	0	0	0	0	0	0	0	0	2.08991	0	0	0	0	0	0	0
mmu_circ_000282	chr1_123292846_123294428_F	circRNA	Yes	chr1	123292846	123294428	+	251	1582	2	0,1469	138,113	123292846,123294315	123292984,123294428	PREDICTED.1792.1	chr1:123292622-123292846|chr1:123294428-123295848	0	0	0	0	0	0	0	2	0	0	0	0	0	0	0	0	0	0	0	0	0	0	0	0	0	0	0	0	0	0	0	0	0
mmu_circ_000293	chr1_125948025_125974568_R	circRNA	Yes	chr1	125948025	125974568	-	564	26543	5	0,2416,3449,4986,26334	116,94,73,72,209	125948025,125950441,125951474,125953011,125974359	125948141,125950535,125951547,125953083,125974568	PREDICTED.4664.1	chr1:125947017-125948025|chr1:125974568-125988186	0	0	0	0	0	0	0	1	0	0	0	1	0	0	2	0	0	0	0	0	0	0	0	0	0	0	0	0	0	0	0	0	0
mmu_circ_000294	chr1_125950441_125992972_R	circRNA	Yes	chr1	125950441	125992972	-	618	42531	7	0,1033,2570,23918,37745,40540,42472	94,73,72,209,58,53,59	125950441,125951474,125953011,125974359,125988186,125990981,125992913	125950535,125951547,125953083,125974568,125988244,125991034,125992972	PREDICTED.4664.1	chr1:125948141-125950441|chr1:125992972-126029252	0	0	0	0	0	0	0	0	0	0	0	0	0	0	0	0	2	0	0	0	0	0	0	0	0	0	0	0	0	0	0	0	0
mmu_circ_000296	chr1_125974359_125992972_R	circRNA	Yes	chr1	125974359	125992972	-	379	18613	4	0,13827,16622,18554	209,58,53,59	125974359,125988186,125990981,125992913	125974568,125988244,125991034,125992972	PREDICTED.4664.1	chr1:125953083-125974359|chr1:125992972-126029252	2	0	0	0	0	0	0	0	0	1	0	0	0	0	0	0	0	0	1	0	0	0	0	0	0.613597	2.08991	0	0	0	0	0	0	0
mmu_circ_000297	chr1_126045960_126047115_F	circRNA	Yes	chr1	126045960	126047115	+	302	1155	3	0,201,1005	102,50,150	126045960,126046161,126046965	126046062,126046211,126047115	ENSMMUT00000023508	chr1:126044319-126045960|chr1:126047115-126048183	0	0	0	0	0	0	0	0	0	0	0	0	1	0	0	1	0	0	0	0	0	0	0	0	0	0	0	0.688568	0	0	0	0	0
mmu_circ_000304	chr1_126561685_126563107_R	circRNA	Yes	chr1	126561685	126563107	-	382	1422	3	0,346,1255	121,94,167	126561685,126562031,126562940	126561806,126562125,126563107	PREDICTED.3139.2	chr1:126556843-126561685|chr1:126563107-126567820	0	0	0	0	1	0	0	0	0	0	0	0	0	0	0	0	5	0	0	0	0	0	0	0	0	0	0	0	0	0	0	0	0
mmu_circ_000305	chr1_126654111_126661255_F	circRNA	Yes	chr1	126654111	126661255	+	494	7144	4	0,4020,5545,7051	82,167,152,93	126654111,126658131,126659656,126661162	126654193,126658298,126659808,126661255	ENSMMUT00000046170	chr1:126649877-126654111|chr1:126661255-126669057	0	1	0	0	0	0	0	0	0	0	0	0	1	0	0	0	0	0	0	0	0	0	0	0	0	0	0	0.688568	1.55173	0	0	0	0
mmu_circ_000306	chr1_126654111_126673890_F	circRNA	Yes	chr1	126654111	126673890	+	1211	19779	10	0,4020,5545,7051,8418,10570,11825,14946,15683,19613	82,167,152,93,97,74,111,115,154,166	126654111,126658131,126659656,126661162,126662529,126664681,126665936,126669057,126669794,126673724	126654193,126658298,126659808,126661255,126662626,126664755,126666047,126669172,126669948,126673890	PREDICTED.1898.2	chr1:126649877-126654111|chr1:126673890-126678119	0	0	0	0	0	2	0	0	0	0	0	0	0	0	0	0	0	0	0	0	0	0	0	0	0	0	0	0	0	0	0	0	0
mmu_circ_000308	chr1_1276654_1277513_R	circRNA	Yes	chr1	1276654	1277513	-	859	859	1	0	859	1276654	1277513	PREDICTED.40.1	chr1:1268444-1276654|chr1:1277513-1280559	1	0	0	0	0	0	0	0	0	0	0	0	0	0	0	0	0	0	0	0	1	0	0	0	0	1.04496	0	0	0	0	0	0	0
mmu_circ_000309	chr1_1276654_1280791_R	circRNA	Yes	chr1	1276654	1280791	-	1091	4137	3	0,1188,3901	853,2,236	1276654,1277842,1280555	1277507,1277844,1280791	PREDICTED.47.2	chr1:1260826-1276654|chr1:1280791-1282019	0	0	0	0	0	0	2	0	0	0	0	0	0	0	0	0	0	0	0	0	0	0	0	0	0	0	1.98065	0	0	0	0	0	0
mmu_circ_000310	chr1_12790088_12792455_R	circRNA	Yes	chr1	12790088	12792455	-	705	2367	4	0,957,1795,2209	171,227,149,158	12790088,12791045,12791883,12792297	12790259,12791272,12792032,12792455	ENSMMUT00000008710	chr1:12789664-12790088|chr1:12792455-12793869	0	1	1	0	0	0	0	0	0	0	0	1	0	0	0	0	0	0	1	0	0	0	0	0	0.613597	0	0	0	1.55173	0.993085	0	0	0
mmu_circ_000311	chr1_12807250_12807436_R	circRNA	Yes*	chr1	12807250	12807436	-	186	186	1	0	186	12807250	12807436	ENSMMUT00000008710	chr1:12802547-12807250|chr1:12807436-12807864	0	0	1	0	0	0	0	0	0	0	0	0	0	0	0	0	0	0	0	0	0	0	0	0	0	0	0	0	0	0.993085	0	0	0
mmu_circ_000312	chr1_128312303_128317313_R	circRNA	Yes	chr1	128312303	128317313	-	241	5010	2	0,4882	113,128	128312303,128317185	128312416,128317313	PREDICTED.4826.2	chr1:128303253-128312303|chr1:128317313-128318761	0	1	0	0	0	0	0	0	0	0	0	0	2	0	0	0	0	0	0	0	0	0	0	0	0	0	0	1.37714	1.55173	0	0	0	0
mmu_circ_000315	chr1_128435948_128442044_F	circRNA	Yes	chr1	128435948	128442044	+	647	6096	6	0,682,860,1764,5441,5982	80,69,138,111,135,114	128435948,128436630,128436808,128437712,128441389,128441930	128436028,128436699,128436946,128437823,128441524,128442044	ENSMMUT00000019205	chr1:128430853-128435948|chr1:128442044-128442767	0	0	1	0	0	0	0	0	0	0	0	0	1	0	0	0	0	0	0	0	0	0	0	0	0	0	0	0.688568	0	0.993085	0	0	0
mmu_circ_000317	chr1_128437712_128442044_F	circRNA	Yes	chr1	128437712	128442044	+	360	4332	3	0,3677,4218	111,135,114	128437712,128441389,128441930	128437823,128441524,128442044	ENSMMUT00000019205	chr1:128436946-128437712|chr1:128442044-128442767	0	0	0	0	0	0	0	0	0	0	0	1	0	0	0	0	0	1	0	0	0	0	0	0	0	0	0	0	0	0	0	0	0.705287
mmu_circ_000318	chr1_128437712_128472357_F	circRNA	Yes	chr1	128437712	128472357	+	1049	34645	8	0,3677,4218,5055,14564,14925,15839,34513	111,135,114,168,159,108,122,132	128437712,128441389,128441930,128442767,128452276,128452637,128453551,128472225	128437823,128441524,128442044,128442935,128452435,128452745,128453673,128472357	ENSMMUT00000019205	chr1:128436946-128437712|chr1:128472357-128507008	1	0	0	0	0	0	0	0	0	0	0	0	0	0	0	0	2	0	0	0	0	0	0	0	0	1.04496	0	0	0	0	0	0	0
mmu_circ_000319	chr1_128452276_128472357_F	circRNA	Yes	chr1	128452276	128472357	+	521	20081	4	0,361,1275,19949	159,108,122,132	128452276,128452637,128453551,128472225	128452435,128452745,128453673,128472357	ENSMMUT00000019205	chr1:128442935-128452276|chr1:128472357-128507008	1	0	0	0	0	0	0	0	0	0	0	0	0	0	0	0	1	0	0	0	0	0	0	0	0	1.04496	0	0	0	0	0	0	0
mmu_circ_000322	chr1_128709009_128709316_F	circRNA	Yes	chr1	128709009	128709316	+	307	307	1	0	307	128709009	128709316	PREDICTED.2153.2	chr1:128706775-128709009|chr1:128709316-128711933	0	0	0	0	0	0	0	0	0	0	0	0	0	1	0	0	0	0	0	0	0	0	1	0	0	0	0	0	0	0	0	0	0
mmu_circ_000323	chr1_128797917_128827073_F	circRNA	Yes*	chr1	128797917	128827073	+	665	29156	6	0,24001,24967,26311,27008,28980	130,101,78,53,127,176	128797917,128821918,128822884,128824228,128824925,128826897	128798047,128822019,128822962,128824281,128825052,128827073	PREDICTED.2162.3	chr1:128739949-128797917|chr1:128827073-128837424	0	0	0	1	0	0	0	0	0	0	0	0	0	0	0	0	0	0	0	0	0	0	0	0	0	0	0	0	0	0	0	0	0
mmu_circ_000324	chr1_128821918_128825052_F	circRNA	Yes*	chr1	128821918	128825052	+	359	3134	4	0,966,2310,3007	101,78,53,127	128821918,128822884,128824228,128824925	128822019,128822962,128824281,128825052	PREDICTED.1943.2	chr1:128798047-128821918|chr1:128825052-128826897	0	0	0	0	0	0	0	1	0	0	0	0	0	0	0	0	0	0	0	0	0	0	0	0	0	0	0	0	0	0	0	0	0
mmu_circ_000325	chr1_128821918_128827073_F	circRNA	Yes	chr1	128821918	128827073	+	535	5155	5	0,966,2310,3007,4979	101,78,53,127,176	128821918,128822884,128824228,128824925,128826897	128822019,128822962,128824281,128825052,128827073	ENSMMUT00000010201	chr1:128798047-128821918|chr1:128827073-128837424	2	0	0	1	0	0	0	1	0	0	0	0	2	3	2	0	0	0	0	0	0	0	0	0	0	2.08991	0	1.37714	0	0	0	0	0
mmu_circ_000328	chr1_128837424_128837707_F	circRNA	Yes	chr1	128837424	128837707	+	283	283	1	0	283	128837424	128837707	PREDICTED.3178.1	chr1:128827073-128837424|chr1:128837707-128840476	0	0	0	0	0	0	0	0	0	0	0	0	0	0	0	0	0	1	1	0	0	0	0	0	0.613597	0	0	0	0	0	0	0	0.705287
mmu_circ_000330	chr1_128840476_128840734_F	circRNA	Yes	chr1	128840476	128840734	+	258	258	1	0	258	128840476	128840734	ENSMMUT00000010201	chr1:128837707-128840476|chr1:128840734-128845391	0	0	0	0	0	0	0	0	0	0	0	0	0	1	1	0	0	0	0	0	0	0	0	0	0	0	0	0	0	0	0	0	0
mmu_circ_000332	chr1_128940705_128940836_F	ciRNA	Yes*	chr1	128940705	128940836	+	131	131	1	0	131	128940705	128940836	PREDICTED.2256.1	chr1:128940705-128940868	0	0	0	0	0	0	0	0	0	0	0	0	0	1	0	0	0	0	0	0	0	0	0	0	0	0	0	0	0	0	0	0	0
mmu_circ_000333	chr1_128940705_128940840_F	ciRNA	Yes	chr1	128940705	128940840	+	135	135	1	0	135	128940705	128940840	ENSMMUT00000046098	chr1:128940705-128940868	0	0	0	1	0	0	0	0	0	0	0	0	0	1	0	0	1	0	0	0	0	0	0	0	0	0	0	0	0	0	0	0	0
mmu_circ_000334	chr1_128940705_128940843_F	ciRNA	Yes	chr1	128940705	128940843	+	138	138	1	0	138	128940705	128940843	ENSMMUT00000046098	chr1:128940705-128940868	0	0	0	0	0	0	0	1	0	0	0	0	1	1	0	0	0	0	0	1	0	0	0	0	0	0	0	0.688568	0	0	0	0	0
mmu_circ_000335	chr1_128940705_128940844_F	ciRNA	Yes	chr1	128940705	128940844	+	139	139	1	0	139	128940705	128940844	ENSMMUT00000046098	chr1:128940705-128940868	0	0	0	0	0	0	0	1	2	0	0	0	2	4	0	0	3	0	0	0	0	0	0	0	0	0	0	1.37714	0	0	0	0	0
mmu_circ_000336	chr1_128940705_128940845_F	ciRNA	Yes	chr1	128940705	128940845	+	140	140	1	0	140	128940705	128940845	PREDICTED.3429.2	chr1:128940705-128940868	0	0	0	0	0	0	2	0	0	0	0	0	0	0	0	0	0	0	0	0	0	0	0	0	0	0	1.98065	0	0	0	0	0	0
mmu_circ_000338	chr1_128940705_128940852_F	ciRNA	Yes*	chr1	128940705	128940852	+	147	147	1	0	147	128940705	128940852	PREDICTED.5511.3	chr1:128940705-128940868	0	0	0	0	1	0	0	0	0	0	0	0	0	0	0	0	0	0	0	0	0	0	0	0	0	0	0	0	0	0	0	0	0
mmu_circ_000340	chr1_128962133_128962454_R	ciRNA	Yes	chr1	128962133	128962454	-	321	321	1	0	321	128962133	128962454	PREDICTED.2204.1	chr1:128962104-128962454	0	0	0	0	0	0	0	0	0	0	0	0	0	0	1	1	0	0	0	0	0	0	0	0	0	0	0	0	0	0	0	0	0
mmu_circ_000341	chr1_128962134_128962454_R	ciRNA	Yes	chr1	128962134	128962454	-	320	320	1	0	320	128962134	128962454	PREDICTED.2204.1	chr1:128962104-128962454	0	0	1	2	0	0	0	2	0	0	0	0	0	1	0	0	0	0	0	0	0	0	0	0	0	0	0	0	0	0.993085	0	0	0
mmu_circ_000345	chr1_129166725_129168125_R	circRNA	Yes	chr1	129166725	129168125	-	224	1400	2	0,1303	127,97	129166725,129168028	129166852,129168125	PREDICTED.1970.2	chr1:129160290-129166725|chr1:129168125-129202693	0	0	0	0	0	0	0	0	2	0	0	0	0	0	0	0	0	0	0	0	0	0	0	0	0	0	0	0	0	0	0	0	0
mmu_circ_000350	chr1_129231827_129234993_R	circRNA	Yes*	chr1	129231827	129234993	-	278	3166	5	0,107,2353,2913,3085	75,67,53,2,81	129231827,129231934,129234180,129234740,129234912	129231902,129232001,129234233,129234742,129234993	PREDICTED.2063.1	chr1:129228056-129231827|chr1:129234993-129236843	0	0	0	0	0	0	0	0	0	0	0	0	0	1	0	0	0	0	0	0	0	0	0	0	0	0	0	0	0	0	0	0	0
mmu_circ_000352	chr1_129331914_129334365_F	circRNA	Yes	chr1	129331914	129334365	+	423	2451	2	0,2299	271,152	129331914,129334213	129332185,129334365	ENSMMUT00000032683	chr1:129331020-129331914|chr1:129334365-129347753	1	0	0	0	0	0	0	0	0	0	0	0	0	0	0	0	0	0	0	0	1	0	0	0	0	1.04496	0	0	0	0	0	0	0
mmu_circ_000354	chr1_129334213_129349263_F	circRNA	Yes	chr1	129334213	129349263	+	287	15050	3	0,13540,14950	152,35,100	129334213,129347753,129349163	129334365,129347788,129349263	ENSMMUT00000032683	chr1:129332185-129334213|chr1:129349263-129350082	1	0	0	1	0	0	0	1	0	0	0	0	0	0	0	0	0	0	0	0	0	0	0	0	0	1.04496	0	0	0	0	0	0	0
mmu_circ_000356	chr1_129351441_129352633_F	circRNA	Yes	chr1	129351441	129352633	+	265	1192	2	0,1001	74,191	129351441,129352442	129351515,129352633	PREDICTED.3313.2	chr1:129350573-129351441|chr1:129352633-129354672	0	0	0	0	0	0	0	0	0	0	0	0	0	0	1	0	1	0	0	0	0	0	0	0	0	0	0	0	0	0	0	0	0
mmu_circ_000357	chr1_129354672_129357391_F	circRNA	Yes	chr1	129354672	129357391	+	440	2719	3	0,2314,2563	127,157,156	129354672,129356986,129357235	129354799,129357143,129357391	ENSMMUT00000032683	chr1:129352633-129354672|chr1:129357391-129358329	1	0	0	0	0	0	0	0	0	0	0	0	0	0	0	0	0	1	0	0	0	0	0	0	0	1.04496	0	0	0	0	0	0	0.705287
mmu_circ_000358	chr1_129428378_129436233_F	circRNA	Yes	chr1	129428378	129436233	+	640	7855	4	0,649,6791,7696	93,203,185,159	129428378,129429027,129435169,129436074	129428471,129429230,129435354,129436233	ENSMMUT00000014058	chr1:129418638-129428378|chr1:129436233-129438105	0	0	0	1	0	0	0	2	0	0	0	0	0	0	0	0	0	0	0	0	0	0	0	0	0	0	0	0	0	0	0	0	0
mmu_circ_000359	chr1_129435169_129436233_F	circRNA	Yes	chr1	129435169	129436233	+	344	1064	2	0,905	185,159	129435169,129436074	129435354,129436233	ENSMMUT00000014058	chr1:129429230-129435169|chr1:129436233-129438105	1	0	1	0	1	0	2	0	2	1	0	0	0	0	1	0	1	2	0	0	0	1	0	0	0	1.04496	1.98065	0	0	0.993085	0.430566	0	1.41057
mmu_circ_000361	chr1_129438105_129442269_F	circRNA	Yes	chr1	129438105	129442269	+	254	4164	2	0,4005	95,159	129438105,129442110	129438200,129442269	PREDICTED.3120.1	chr1:129436233-129438105|chr1:129442269-129446920	0	0	0	0	0	0	0	0	0	0	0	2	0	0	0	0	0	0	0	0	1	0	0	0	0	0	0	0	0	0	0	0	0
mmu_circ_000362	chr1_129509472_129513578_F	circRNA	Yes	chr1	129509472	129513578	+	346	4106	2	0,3955	195,151	129509472,129513427	129509667,129513578	ENSMMUT00000046058	None|chr1:129513578-129526300	0	0	1	0	0	1	2	0	0	0	0	0	0	0	2	0	1	0	0	0	0	0	0	0	0	0	1.98065	0	0	0.993085	0	0	0
mmu_circ_000364	chr1_129559302_129559448_R	ciRNA	Yes	chr1	129559302	129559448	-	146	146	1	0	146	129559302	129559448	PREDICTED.4884.1	chr1:129559274-129559448	0	0	0	0	0	0	0	0	0	0	2	0	0	0	1	0	0	0	0	0	0	0	0	0	0	0	0	0	0	0	0	0	0
mmu_circ_000365	chr1_129559305_129559448_R	ciRNA	Yes	chr1	129559305	129559448	-	143	143	1	0	143	129559305	129559448	ENSMMUT00000010708	chr1:129559274-129559448	0	0	0	2	0	0	1	2	0	0	0	0	0	1	0	0	0	2	0	0	0	0	0	0	0	0	0.990325	0	0	0	0	0	1.41057
mmu_circ_000367	chr1_129564235_129564922_R	circRNA	Yes	chr1	129564235	129564922	-	236	687	3	0,214,572	57,64,115	129564235,129564449,129564807	129564292,129564513,129564922	ENSMMUT00000010709	chr1:129563551-129564235|chr1:129564922-129567104	0	0	0	0	1	0	0	1	0	0	0	0	0	0	0	1	0	0	0	0	0	0	1	0	0	0	0	0	0	0	0	0	0
mmu_circ_000369	chr1_129592331_129592811_F	circRNA	Yes	chr1	129592331	129592811	+	276	480	3	0,186,391	89,98,89	129592331,129592517,129592722	129592420,129592615,129592811	ENSMMUT00000011062	chr1:129591975-129592331|chr1:129592811-129593845	2	0	0	0	2	0	0	0	0	0	0	0	0	0	0	0	1	0	0	0	0	0	0	0	0	2.08991	0	0	0	0	0	0	0
mmu_circ_000370	chr1_129603373_129611074_R	circRNA	Yes	chr1	129603373	129611074	-	322	7701	2	0,7524	145,177	129603373,129610897	129603518,129611074	ENSMMUT00000046048	chr1:129602112-129603373|chr1:129611074-129612744	1	1	1	0	0	0	0	0	0	0	0	0	0	0	1	0	0	0	0	0	0	0	0	0	0	1.04496	0	0	1.55173	0.993085	0	0	0
mmu_circ_000371	chr1_129612744_129613189_R	circRNA	Yes	chr1	129612744	129613189	-	268	445	2	0,292	115,153	129612744,129613036	129612859,129613189	ENSMMUT00000046048	chr1:129611074-129612744|chr1:129613189-129618041	1	0	0	1	0	0	0	0	0	0	1	0	0	0	0	0	1	0	0	0	0	0	0	0	0	1.04496	0	0	0	0	0	0	0
mmu_circ_000372	chr1_129612896_129613036_R	ciRNA	Yes	chr1	129612896	129613036	-	140	140	1	0	140	129612896	129613036	PREDICTED.3312.3	chr1:129612859-129613036	0	0	0	0	0	0	0	0	0	0	0	0	0	0	0	0	2	0	0	0	0	0	0	0	0	0	0	0	0	0	0	0	0
mmu_circ_000374	chr1_129659898_129660933_F	circRNA	Yes*	chr1	129659898	129660933	+	402	1035	3	0,579,882	131,118,153	129659898,129660477,129660780	129660029,129660595,129660933	PREDICTED.2095.1	chr1:129655178-129659898|chr1:129660933-129662670	0	0	0	0	0	0	0	0	0	0	0	0	1	0	0	0	0	0	0	0	0	0	0	0	0	0	0	0.688568	0	0	0	0	0
mmu_circ_000376	chr1_129671368_129671813_F	circRNA	Yes	chr1	129671368	129671813	+	277	445	2	0,315	147,130	129671368,129671683	129671515,129671813	ENSMMUT00000046046	chr1:129669275-129671368|chr1:129671813-129690110	3	3	0	0	1	0	3	3	3	0	0	0	1	7	0	0	2	0	0	0	3	0	0	0	0	3.13487	2.97097	0.688568	4.65518	0	0	0	0
mmu_circ_000377	chr1_129690110_129691682_F	circRNA	Yes	chr1	129690110	129691682	+	256	1572	2	0,1457	141,115	129690110,129691567	129690251,129691682	ENSMMUT00000046046	chr1:129671813-129690110|chr1:129691682-129692490	0	0	0	4	1	0	3	4	1	0	2	3	3	1	6	0	2	3	1	1	1	0	1	0	0.613597	0	2.97097	2.0657	0	0	0	0	2.11586
mmu_circ_000379	chr1_129724750_129724924_F	ciRNA	Yes*	chr1	129724750	129724924	+	174	174	1	0	174	129724750	129724924	ENSMMUT00000018471	chr1:129724750-129724947	0	0	0	0	0	0	0	0	0	0	0	0	0	0	0	0	1	0	0	0	0	0	0	0	0	0	0	0	0	0	0	0	0
mmu_circ_000381	chr1_129736991_129737474_R	circRNA	Yes	chr1	129736991	129737474	-	229	483	2	0,378	124,105	129736991,129737369	129737115,129737474	ENSMMUT00000018475	chr1:129733483-129736991|chr1:129737474-129738347	0	1	0	0	0	0	1	0	0	1	0	0	0	0	0	0	1	0	0	0	0	0	0	0	0	0	0.990325	0	1.55173	0	0	0	0
mmu_circ_000382	chr1_129751518_129752455_R	circRNA	Yes	chr1	129751518	129752455	-	937	937	1	0	937	129751518	129752455	ENSMMUT00000018476	chr1:129743403-129751518|chr1:129752455-129763992	0	1	0	3	3	1	3	0	1	0	1	1	3	4	1	0	4	2	0	0	3	0	0	0	0	0	2.97097	2.0657	1.55173	0	0	0	1.41057
mmu_circ_000384	chr1_129802065_129802204_R	ciRNA	Yes	chr1	129802065	129802204	-	139	139	1	0	139	129802065	129802204	PREDICTED.3590.2	chr1:129802047-129802204	0	0	0	0	1	0	1	0	0	0	0	0	1	0	0	0	1	0	0	0	0	0	0	0	0	0	0.990325	0.688568	0	0	0	0	0
mmu_circ_000385	chr1_129846290_129847067_R	circRNA	Yes*	chr1	129846290	129847067	-	248	777	2	0,676	147,101	129846290,129846966	129846437,129847067	PREDICTED.3453.1	chr1:129842888-129846290|chr1:129847067-129858399	0	0	0	0	0	0	0	0	0	0	0	0	0	0	0	1	0	0	0	0	0	0	0	0	0	0	0	0	0	0	0	0	0
mmu_circ_000386	chr1_129858399_129860015_R	circRNA	Yes	chr1	129858399	129860015	-	600	1616	3	0,499,1509	155,338,107	129858399,129858898,129859908	129858554,129859236,129860015	ENSMMUT00000029430	chr1:129847067-129858399|chr1:129860015-129863872	1	3	0	1	0	0	4	2	0	0	0	0	1	0	2	4	0	1	0	0	0	0	0	0	0	1.04496	3.9613	0.688568	4.65518	0	0	0	0.705287
mmu_circ_000388	chr1_129858399_129866888_R	circRNA	Yes*	chr1	129858399	129866888	-	1395	8489	7	0,499,1509,5473,5773,7250,8313	155,338,107,219,291,109,176	129858399,129858898,129859908,129863872,129864172,129865649,129866712	129858554,129859236,129860015,129864091,129864463,129865758,129866888	PREDICTED.5563.1	chr1:129847067-129858399|chr1:129866888-129876922	0	0	0	0	0	0	1	0	0	0	0	0	0	0	0	0	0	0	0	0	0	0	0	0	0	0	0.990325	0	0	0	0	0	0
mmu_circ_000390	chr1_129863872_129866888_R	circRNA	Yes	chr1	129863872	129866888	-	795	3016	4	0,300,1777,2840	219,291,109,176	129863872,129864172,129865649,129866712	129864091,129864463,129865758,129866888	PREDICTED.5672.1	chr1:129860015-129863872|chr1:129866888-129875768	1	0	0	0	1	0	0	0	0	0	3	1	3	0	0	0	0	0	0	0	1	0	0	0	0	1.04496	0	2.0657	0	0	0	0	0
mmu_circ_000391	chr1_130015940_130016956_F	circRNA	Yes	chr1	130015940	130016956	+	190	1016	2	0,932	106,84	130015940,130016872	130016046,130016956	ENSMMUT00000046011	chr1:130011603-130015940|chr1:130016956-130018457	0	1	0	0	0	0	1	0	0	0	0	0	0	1	0	0	0	0	0	0	0	0	0	0	0	0	0.990325	0	1.55173	0	0	0	0
mmu_circ_000392	chr1_130076449_130103478_F	circRNA	Yes	chr1	130076449	130103478	+	838	27029	6	0,17173,19910,21244,21515,26811	232,193,65,105,25,218	130076449,130093622,130096359,130097693,130097964,130103260	130076681,130093815,130096424,130097798,130097989,130103478	PREDICTED.5142.1	chr1:130049972-130076449|chr1:130103478-130123373	2	2	0	2	1	2	3	0	0	0	1	2	2	0	5	5	3	5	2	0	1	0	0	1	1.22719	2.08991	2.97097	1.37714	3.10345	0	0	0.401374	3.52644
mmu_circ_000393	chr1_130076449_130123463_F	circRNA	Yes*	chr1	130076449	130123463	+	928	47014	7	0,17173,19910,21244,21515,26811,46924	232,193,65,105,25,218,90	130076449,130093622,130096359,130097693,130097964,130103260,130123373	130076681,130093815,130096424,130097798,130097989,130103478,130123463	PREDICTED.1702.1	chr1:130049972-130076449|chr1:130123463-130134348	0	0	0	0	0	0	0	0	0	0	0	0	0	0	1	0	0	0	0	0	0	0	0	0	0	0	0	0	0	0	0	0	0
mmu_circ_000394	chr1_130093622_130103478_F	circRNA	Yes	chr1	130093622	130103478	+	606	9856	5	0,2737,4071,4342,9638	193,65,105,25,218	130093622,130096359,130097693,130097964,130103260	130093815,130096424,130097798,130097989,130103478	PREDICTED.5142.1	chr1:130076681-130093622|chr1:130103478-130123373	0	0	0	1	0	1	1	0	0	0	0	0	0	2	0	0	0	0	0	1	0	0	0	0	0	0	0.990325	0	0	0	0	0	0
mmu_circ_000396	chr1_13014128_13017327_R	circRNA	Yes	chr1	13014128	13017327	-	344	3199	3	0,1856,3090	99,136,109	13014128,13015984,13017218	13014227,13016120,13017327	PREDICTED.341.1	chr1:13011038-13014128|chr1:13017327-13023782	1	0	0	0	1	0	0	0	0	0	0	0	0	0	0	0	0	0	0	0	0	0	0	0	0	1.04496	0	0	0	0	0	0	0
mmu_circ_000397	chr1_1305512_1315657_R	circRNA	Yes	chr1	1305512	1315657	-	703	10145	2	0,9694	252,451	1305512,1315206	1305764,1315657	PREDICTED.32.4	chr1:1305422-1305512|chr1:1315657-1318464	2	0	0	0	0	0	0	0	0	0	0	0	0	2	0	0	0	0	0	0	0	0	0	0	0	2.08991	0	0	0	0	0	0	0
mmu_circ_000398	chr1_1305512_1315657_R	circRNA	Yes	chr1	1305512	1315657	-	586	10145	3	0,9694,9991	252,180,154	1305512,1315206,1315503	1305764,1315386,1315657	PREDICTED.51.2	chr1:1305422-1305512|chr1:1315657-1318464	0	1	2	0	0	1	3	5	0	0	0	2	3	0	4	3	1	0	2	2	0	2	0	0	1.22719	0	2.97097	2.0657	1.55173	1.98617	0.861132	0	0
mmu_circ_000399	chr1_13058099_13061569_F	circRNA	Yes	chr1	13058099	13061569	+	355	3470	2	0,3286	171,184	13058099,13061385	13058270,13061569	ENSMMUT00000008211	chr1:13024678-13058099|chr1:13061569-13067545	0	0	0	1	1	0	0	0	0	0	0	0	0	0	0	0	0	0	0	0	0	0	0	0	0	0	0	0	0	0	0	0	0
mmu_circ_000401	chr1_13158958_13177036_F	circRNA	Yes	chr1	13158958	13177036	+	323	18078	2	0,17942	187,136	13158958,13176900	13159145,13177036	PREDICTED.631.1	chr1:13119747-13158958|chr1:13177036-13183733	0	0	0	0	0	0	1	0	0	1	0	0	0	0	0	0	0	0	0	0	0	0	0	0	0	0	0.990325	0	0	0	0	0	0
mmu_circ_000402	chr1_13176900_13189676_F	circRNA	Yes*	chr1	13176900	13189676	+	598	12776	4	0,6833,10441,12547	136,88,145,229	13176900,13183733,13187341,13189447	13177036,13183821,13187486,13189676	PREDICTED.328.2	chr1:13159145-13176900|chr1:13189676-13190128	0	0	0	0	0	0	0	0	0	0	0	0	0	1	0	0	0	0	0	0	0	0	0	0	0	0	0	0	0	0	0	0	0
mmu_circ_000404	chr1_13210091_13236646_F	circRNA	Yes	chr1	13210091	13236646	+	1372	26555	11	0,3228,4352,4566,6213,8765,11127,19708,21515,24486,26319	84,57,117,99,114,199,139,100,128,99,236	13210091,13213319,13214443,13214657,13216304,13218856,13221218,13229799,13231606,13234577,13236410	13210175,13213376,13214560,13214756,13216418,13219055,13221357,13229899,13231734,13234676,13236646	PREDICTED.328.1	chr1:13204983-13210091|chr1:13236646-13243498	0	0	0	0	0	0	0	1	0	0	0	0	0	0	0	0	0	0	0	1	0	0	0	0	0	0	0	0	0	0	0	0	0
mmu_circ_000406	chr1_13214443_13214756_F	circRNA	Yes	chr1	13214443	13214756	+	313	313	1	0	313	13214443	13214756	PREDICTED.419.2	chr1:13213376-13214443|chr1:13214756-13216304	0	0	0	0	0	0	0	0	0	0	0	1	0	0	0	0	0	0	0	0	0	0	1	0	0	0	0	0	0	0	0	0	0
mmu_circ_000407	chr1_13214443_13214756_F	circRNA	Yes	chr1	13214443	13214756	+	216	313	2	0,214	117,99	13214443,13214657	13214560,13214756	PREDICTED.393.1	chr1:13213376-13214443|chr1:13214756-13216304	0	0	0	0	0	0	0	2	0	0	0	0	1	0	3	0	0	4	0	0	1	0	0	0	0	0	0	0.688568	0	0	0	0	2.82115
mmu_circ_000409	chr1_13218856_13221357_F	circRNA	Yes	chr1	13218856	13221357	+	338	2501	2	0,2362	199,139	13218856,13221218	13219055,13221357	PREDICTED.273.2	chr1:13216418-13218856|chr1:13221357-13229799	0	0	0	1	0	0	0	0	0	0	0	0	0	0	1	0	0	0	0	0	0	0	0	0	0	0	0	0	0	0	0	0	0
mmu_circ_000412	chr1_13229799_13236646_F	circRNA	Yes	chr1	13229799	13236646	+	563	6847	4	0,1807,4778,6611	100,128,99,236	13229799,13231606,13234577,13236410	13229899,13231734,13234676,13236646	PREDICTED.221.4	chr1:13221357-13229799|chr1:13236646-13243498	0	0	0	0	0	0	0	0	0	0	0	0	0	0	2	0	0	0	0	0	0	0	0	0	0	0	0	0	0	0	0	0	0
mmu_circ_000417	chr1_13234577_13246774_F	circRNA	Yes*	chr1	13234577	13246774	+	607	12197	4	0,1833,8921,12052	99,236,127,145	13234577,13236410,13243498,13246629	13234676,13236646,13243625,13246774	PREDICTED.506.1	chr1:13231734-13234577|chr1:13246774-13254607	0	0	0	0	0	0	0	0	0	0	0	0	0	0	0	1	0	0	0	0	0	0	0	0	0	0	0	0	0	0	0	0	0
mmu_circ_000418	chr1_13236410_13236646_F	circRNA	Yes	chr1	13236410	13236646	+	236	236	1	0	236	13236410	13236646	PREDICTED.419.2	chr1:13234676-13236410|chr1:13236646-13243498	0	0	0	0	0	0	0	2	0	0	0	0	1	1	0	0	0	0	0	0	0	0	1	0	0	0	0	0.688568	0	0	0	0	0
mmu_circ_000419	chr1_132448704_132448883_R	ciRNA	Yes	chr1	132448704	132448883	-	179	179	1	0	179	132448704	132448883	ENSMMUT00000007052	chr1:132448682-132448883	2	1	3	2	12	4	6	8	7	1	3	0	5	2	12	2	8	9	0	1	9	0	0	2	0	2.08991	5.94195	3.44284	1.55173	2.97926	0	0.802748	6.34759
mmu_circ_000423	chr1_132456433_132456576_R	ciRNA	Yes*	chr1	132456433	132456576	-	143	143	1	0	143	132456433	132456576	PREDICTED.2226.3	chr1:132456399-132456576	0	0	0	1	0	0	0	0	0	0	0	0	0	0	0	0	0	0	0	0	0	0	0	0	0	0	0	0	0	0	0	0	0
mmu_circ_000424	chr1_132456435_132456576_R	ciRNA	Yes	chr1	132456435	132456576	-	141	141	1	0	141	132456435	132456576	ENSMMUT00000007052	chr1:132456399-132456576	0	0	0	0	0	1	1	0	0	0	0	0	0	0	0	0	0	0	0	0	0	0	0	0	0	0	0.990325	0	0	0	0	0	0
mmu_circ_000425	chr1_132469262_132469412_R	ciRNA	Yes*	chr1	132469262	132469412	-	150	150	1	0	150	132469262	132469412	ENSMMUT00000007054	chr1:132469243-132469412	0	0	0	0	0	0	0	1	0	0	0	0	0	0	0	0	0	0	0	0	0	0	0	0	0	0	0	0	0	0	0	0	0
mmu_circ_000433	chr1_132690950_132691241_R	circRNA	Yes	chr1	132690950	132691241	-	189	291	2	0,173	71,118	132690950,132691123	132691021,132691241	PREDICTED.3493.6	chr1:132689532-132690950|chr1:132691241-132694213	0	0	0	0	0	0	0	0	0	0	0	0	0	0	2	0	1	0	0	0	0	0	0	0	0	0	0	0	0	0	0	0	0
mmu_circ_000436	chr1_132759866_132760570_F	circRNA	Yes	chr1	132759866	132760570	+	265	704	2	0,608	169,96	132759866,132760474	132760035,132760570	ENSMMUT00000045894	chr1:132749628-132759866|chr1:132760570-132763264	1	2	0	5	5	0	4	4	3	0	2	4	0	3	10	2	0	0	5	2	6	0	2	2	3.06799	1.04496	3.9613	0	3.10345	0	0	0.802748	0
mmu_circ_000437	chr1_132759866_132760570_F	circRNA	Yes	chr1	132759866	132760570	+	298	704	2	0,608	202,96	132759866,132760474	132760068,132760570	PREDICTED.3519.2	chr1:132749628-132759866|chr1:132760570-132763264	0	0	0	0	0	0	0	0	0	0	0	0	0	0	0	0	13	0	0	0	0	0	0	0	0	0	0	0	0	0	0	0	0
mmu_circ_000438	chr1_132778217_132778832_F	circRNA	Yes	chr1	132778217	132778832	+	451	615	2	0,442	278,173	132778217,132778659	132778495,132778832	ENSMMUT00000045894	chr1:132776557-132778217|chr1:132778832-132782044	2	0	1	0	1	1	1	0	1	0	0	0	3	0	1	0	0	1	0	0	0	0	1	0	0	2.08991	0.990325	2.0657	0	0.993085	0	0	0.705287
mmu_circ_000441	chr1_132787154_132788320_F	circRNA	Yes*	chr1	132787154	132788320	+	136	1166	2	0,1084	54,82	132787154,132788238	132787208,132788320	ENSMMUT00000045894	chr1:132785591-132787154|chr1:132788320-132789191	0	0	0	0	0	0	0	0	0	0	0	0	0	0	1	0	0	0	0	0	0	0	0	0	0	0	0	0	0	0	0	0	0
mmu_circ_000446	chr1_132974222_132975814_F	circRNA	Yes*	chr1	132974222	132975814	+	491	1592	3	0,470,1450	182,167,142	132974222,132974692,132975672	132974404,132974859,132975814	PREDICTED.3202.2	chr1:132970103-132974222|chr1:132975814-132987925	0	0	0	0	0	0	0	0	0	0	0	0	0	0	0	1	0	0	0	0	0	0	0	0	0	0	0	0	0	0	0	0	0
mmu_circ_000448	chr1_1331646_1338395_R	circRNA	Yes	chr1	1331646	1338395	-	273	6749	2	0,6624	148,125	1331646,1338270	1331794,1338395	PREDICTED.17.1	chr1:1320707-1331646|chr1:1338395-1347404	0	0	0	0	0	0	0	1	0	0	0	0	0	0	0	0	0	0	1	0	0	0	0	0	0.613597	0	0	0	0	0	0	0	0
mmu_circ_000453	chr1_13346877_13352888_F	circRNA	Yes	chr1	13346877	13352888	+	323	6011	3	0,2261,5945	77,180,66	13346877,13349138,13352822	13346954,13349318,13352888	PREDICTED.756.1	chr1:13323066-13346877|chr1:13352888-13358313	2	0	0	0	0	0	0	0	0	0	0	0	0	0	0	0	3	0	0	0	0	0	0	0	0	2.08991	0	0	0	0	0	0	0
mmu_circ_000455	chr1_13358313_13359193_F	circRNA	Yes	chr1	13358313	13359193	+	291	880	2	0,768	179,112	13358313,13359081	13358492,13359193	PREDICTED.465.1	chr1:13352888-13358313|chr1:13359193-13366743	4	0	0	0	0	0	0	0	0	0	0	0	0	0	0	0	0	0	0	0	0	0	0	0	0	4.17982	0	0	0	0	0	0	0
mmu_circ_000457	chr1_133605798_133605945_F	ciRNA	Yes	chr1	133605798	133605945	+	147	147	1	0	147	133605798	133605945	PREDICTED.5781.10	chr1:133605798-133607223	0	0	0	0	1	0	0	0	0	0	0	0	1	0	0	0	0	0	0	0	0	0	0	0	0	0	0	0.688568	0	0	0	0	0
mmu_circ_000458	chr1_13366743_13367720_F	circRNA	Yes	chr1	13366743	13367720	+	155	977	2	0,898	76,79	13366743,13367641	13366819,13367720	PREDICTED.756.1	chr1:13366645-13366743|chr1:13367720-13369340	0	1	0	0	0	0	0	0	0	1	0	0	0	0	0	0	1	0	0	0	4	0	0	0	0	0	0	0	1.55173	0	0	0	0
mmu_circ_000459	chr1_13366743_13369483_F	circRNA	Yes*	chr1	13366743	13369483	+	298	2740	3	0,898,2597	76,79,143	13366743,13367641,13369340	13366819,13367720,13369483	PREDICTED.465.1	chr1:13359193-13366743|chr1:13369483-13373648	1	0	0	0	0	0	0	0	0	0	0	0	0	0	0	0	0	0	0	0	0	0	0	0	0	1.04496	0	0	0	0	0	0	0
mmu_circ_000461	chr1_13366743_13373860_F	circRNA	Yes	chr1	13366743	13373860	+	552	7117	5	0,898,2597,3701,6905	76,79,143,42,212	13366743,13367641,13369340,13370444,13373648	13366819,13367720,13369483,13370486,13373860	PREDICTED.756.1	chr1:13366645-13366743|chr1:13373860-13383885	0	0	0	0	0	0	0	0	0	0	0	0	0	0	0	0	2	0	1	0	0	0	0	0	0.613597	0	0	0	0	0	0	0	0
mmu_circ_000462	chr1_13366743_13373860_F	circRNA	Yes	chr1	13366743	13373860	+	474	7117	5	0,898,2597,3701,6983	76,79,143,42,134	13366743,13367641,13369340,13370444,13373726	13366819,13367720,13369483,13370486,13373860	PREDICTED.341.1	chr1:13366645-13366743|chr1:13373860-13383885	0	0	0	0	0	0	0	0	0	0	0	0	0	0	1	0	0	2	0	0	0	0	0	0	0	0	0	0	0	0	0	0	1.41057
mmu_circ_000467	chr1_133816440_133816770_R	circRNA	Yes	chr1	133816440	133816770	-	244	330	2	0,207	121,123	133816440,133816647	133816561,133816770	PREDICTED.2696.2	chr1:133814556-133816440|chr1:133816770-133818091	0	0	0	0	0	0	0	0	0	0	0	0	0	0	4	0	0	0	0	0	0	0	0	0	0	0	0	0	0	0	0	0	0
mmu_circ_000468	chr1_1338270_1347639_R	circRNA	Yes	chr1	1338270	1347639	-	360	9369	2	0,9134	125,235	1338270,1347404	1338395,1347639	PREDICTED.47.3	chr1:1331794-1338270|chr1:1347639-1352684	0	0	0	0	0	0	2	1	0	0	0	0	0	0	0	0	0	0	0	0	0	0	0	0	0	0	1.98065	0	0	0	0	0	0
mmu_circ_000469	chr1_13383885_13390031_F	circRNA	Yes	chr1	13383885	13390031	+	681	6146	7	0,963,3992,4568,5485,5797,6073	80,76,80,107,84,181,73	13383885,13384848,13387877,13388453,13389370,13389682,13389958	13383965,13384924,13387957,13388560,13389454,13389863,13390031	ENSMMUT00000003062	chr1:13373860-13383885|chr1:13390031-13413303	0	0	0	0	0	1	1	1	0	0	0	0	0	0	0	1	0	0	0	0	1	0	0	0	0	0	0.990325	0	0	0	0	0	0
mmu_circ_000476	chr1_133923085_133923519_R	circRNA	Yes	chr1	133923085	133923519	-	260	434	2	0,269	95,165	133923085,133923354	133923180,133923519	PREDICTED.3831.1	chr1:133919783-133923085|chr1:133923519-133926067	1	0	0	2	0	0	0	1	0	0	0	0	0	0	1	0	0	0	0	0	0	0	0	0	0	1.04496	0	0	0	0	0	0	0
mmu_circ_000479	chr1_133943667_133945495_R	circRNA	Yes	chr1	133943667	133945495	-	229	1828	3	0,222,1754	109,46,74	133943667,133943889,133945421	133943776,133943935,133945495	PREDICTED.3831.2	chr1:133936428-133943667|chr1:133945495-133960416	0	0	0	0	0	0	0	4	2	0	0	0	0	0	3	1	3	2	0	0	3	0	0	0	0	0	0	0	0	0	0	0	1.41057
mmu_circ_000482	chr1_133960416_134018370_R	circRNA	Yes*	chr1	133960416	134018370	-	1118	57954	4	0,14994,35432,57852	95,179,742,102	133960416,133975410,133995848,134018268	133960511,133975589,133996590,134018370	PREDICTED.3831.2	chr1:133945495-133960416|chr1:134018370-134037013	0	0	0	0	0	0	0	0	0	0	0	0	0	0	0	0	0	1	0	0	0	0	0	0	0	0	0	0	0	0	0	0	0.705287
mmu_circ_000483	chr1_133995848_133996590_R	circRNA	Yes	chr1	133995848	133996590	-	742	742	1	0	742	133995848	133996590	PREDICTED.6381.1	chr1:133960511-133995848|chr1:133996590-134018268	1	2	0	0	2	2	6	0	2	0	0	1	3	0	6	3	0	5	0	0	4	0	0	0	0	1.04496	5.94195	2.0657	3.10345	0	0	0	3.52644
mmu_circ_000484	chr1_133995848_134018370_R	circRNA	Yes	chr1	133995848	134018370	-	844	22522	2	0,22420	742,102	133995848,134018268	133996590,134018370	PREDICTED.3831.1	chr1:133975589-133995848|chr1:134018370-134037013	0	0	0	0	0	0	0	0	1	0	0	0	0	0	2	1	0	0	0	1	0	0	0	0	0	0	0	0	0	0	0	0	0
mmu_circ_000485	chr1_134037013_134041863_R	circRNA	Yes	chr1	134037013	134041863	-	4528	4850	5	0,1400,1508,1646,1682	1240,62,42,16,3168	134037013,134038413,134038521,134038659,134038695	134038253,134038475,134038563,134038675,134041863	PREDICTED.3831.1	chr1:134018370-134037013|chr1:134041863-134085443	0	0	0	0	0	0	0	0	0	0	0	1	0	0	1	0	0	0	0	0	0	0	0	0	0	0	0	0	0	0	0	0	0
mmu_circ_000486	chr1_134085443_134085962_R	circRNA	Yes	chr1	134085443	134085962	-	519	519	1	0	519	134085443	134085962	PREDICTED.3831.2	chr1:134041863-134085443|chr1:134085962-134254020	0	0	0	0	0	0	0	0	2	0	0	0	0	0	2	0	0	3	0	0	0	0	0	0	0	0	0	0	0	0	0	0	2.11586
mmu_circ_000487	chr1_13413303_13418479_F	circRNA	Yes	chr1	13413303	13418479	+	560	5176	4	0,1699,4157,5038	94,149,179,138	13413303,13415002,13417460,13418341	13413397,13415151,13417639,13418479	PREDICTED.756.1	chr1:13390031-13413303|chr1:13418479-13419992	0	0	0	0	0	0	0	0	0	0	0	0	0	1	0	0	0	0	0	0	1	0	0	1	0	0	0	0	0	0	0	0.401374	0
mmu_circ_000491	chr1_13415002_13418479_F	circRNA	Yes	chr1	13415002	13418479	+	466	3477	3	0,2458,3339	149,179,138	13415002,13417460,13418341	13415151,13417639,13418479	PREDICTED.387.2	chr1:13413397-13415002|chr1:13418479-13419992	0	0	1	0	0	0	0	0	0	0	0	0	0	0	0	0	0	1	0	0	0	0	0	0	0	0	0	0	0	0.993085	0	0	0.705287
mmu_circ_000492	chr1_13415002_13432266_F	circRNA	Yes	chr1	13415002	13432266	+	1304	17264	9	0,2458,3339,4990,11895,14036,14453,14750,17173	149,179,138,249,119,86,130,163,91	13415002,13417460,13418341,13419992,13426897,13429038,13429455,13429752,13432175	13415151,13417639,13418479,13420241,13427016,13429124,13429585,13429915,13432266	PREDICTED.756.1	chr1:13413397-13415002|chr1:13432266-13434765	0	0	0	0	0	0	0	0	0	0	0	0	0	0	0	0	1	0	0	0	1	0	0	0	0	0	0	0	0	0	0	0	0
mmu_circ_000494	chr1_13417460_13418479_F	circRNA	Yes	chr1	13417460	13418479	+	317	1019	2	0,881	179,138	13417460,13418341	13417639,13418479	PREDICTED.387.2	chr1:13415151-13417460|chr1:13418479-13419992	0	0	0	0	0	0	2	0	0	0	0	0	0	0	0	0	0	0	0	0	0	0	0	0	0	0	1.98065	0	0	0	0	0	0
mmu_circ_000496	chr1_134235710_134240591_R	circRNA	Yes	chr1	134235710	134240591	-	404	4881	3	0,2342,4794	145,172,87	134235710,134238052,134240504	134235855,134238224,134240591	ENSMMUT00000018156	chr1:134234120-134235710|chr1:134240591-134242015	0	0	0	0	0	0	0	0	0	0	0	0	1	0	0	1	0	0	0	0	0	0	0	0	0	0	0	0.688568	0	0	0	0	0
mmu_circ_000498	chr1_134235710_134245334_R	circRNA	Yes	chr1	134235710	134245334	-	707	9624	5	0,2342,4794,6305,9520	145,172,87,199,104	134235710,134238052,134240504,134242015,134245230	134235855,134238224,134240591,134242214,134245334	ENSMMUT00000018156	chr1:134234120-134235710|chr1:134245334-134246236	0	0	0	0	0	0	0	0	0	0	0	0	0	0	0	1	1	0	0	0	0	1	1	0	0	0	0	0	0	0	0.430566	0	0
mmu_circ_000500	chr1_134235710_134357186_R	circRNA	Yes	chr1	134235710	134357186	-	1010	121476	7	0,2342,4794,6305,9520,115368,121372	145,172,87,199,104,199,104	134235710,134238052,134240504,134242015,134245230,134351078,134357082	134235855,134238224,134240591,134242214,134245334,134351277,134357186	PREDICTED.3798.4	chr1:134234120-134235710|chr1:134357186-134358623	0	0	0	0	0	0	0	0	0	0	0	0	0	0	0	1	0	0	1	0	0	0	0	0	0.613597	0	0	0	0	0	0	0	0
mmu_circ_000501	chr1_134240504_134242214_R	circRNA	Yes	chr1	134240504	134242214	-	286	1710	2	0,1511	87,199	134240504,134242015	134240591,134242214	ENSMMUT00000018156	chr1:134238224-134240504|chr1:134242214-134245230	0	0	0	0	0	0	0	0	0	0	0	0	0	0	0	1	1	0	0	0	0	0	0	0	0	0	0	0	0	0	0	0	0
mmu_circ_000502	chr1_134240504_134245334_R	circRNA	Yes	chr1	134240504	134245334	-	390	4830	3	0,1511,4726	87,199,104	134240504,134242015,134245230	134240591,134242214,134245334	ENSMMUT00000018156	chr1:134238224-134240504|chr1:134245334-134246236	0	0	0	1	0	0	0	0	0	0	0	0	0	0	0	0	0	0	0	0	0	0	1	0	0	0	0	0	0	0	0	0	0
mmu_circ_000503	chr1_134240504_134357186_R	circRNA	Yes	chr1	134240504	134357186	-	693	116682	5	0,1511,4726,110574,116578	87,199,104,199,104	134240504,134242015,134245230,134351078,134357082	134240591,134242214,134245334,134351277,134357186	PREDICTED.3798.4	chr1:134238224-134240504|chr1:134357186-134358623	0	0	0	0	0	0	0	0	0	0	0	0	0	0	0	2	2	0	0	0	0	0	0	0	0	0	0	0	0	0	0	0	0
mmu_circ_000505	chr1_134242015_134245334_R	circRNA	Yes	chr1	134242015	134245334	-	303	3319	2	0,3215	199,104	134242015,134245230	134242214,134245334	ENSMMUT00000045765	chr1:134240591-134242015|chr1:134245334-134246236	1	0	0	2	0	0	3	1	0	0	0	1	3	2	0	3	3	0	0	0	0	0	2	2	0	1.04496	2.97097	2.0657	0	0	0	0.802748	0
mmu_circ_000506	chr1_134242015_134246277_R	circRNA	Yes	chr1	134242015	134246277	-	344	4262	3	0,3215,4221	199,104,41	134242015,134245230,134246236	134242214,134245334,134246277	ENSMMUT00000045772	chr1:134240591-134242015|chr1:134246277-134254020	0	0	1	0	0	0	0	0	0	0	0	0	0	0	0	0	1	0	0	0	0	0	0	0	0	0	0	0	0	0.993085	0	0	0
mmu_circ_000507	chr1_134242015_134357186_R	circRNA	Yes	chr1	134242015	134357186	-	606	115171	4	0,3215,109063,115067	199,104,199,104	134242015,134245230,134351078,134357082	134242214,134245334,134351277,134357186	PREDICTED.3798.4	chr1:134240591-134242015|chr1:134357186-134358623	0	2	0	0	0	0	0	0	0	0	0	0	1	0	0	2	2	0	2	0	0	0	0	0	1.22719	0	0	0.688568	3.10345	0	0	0	0
mmu_circ_000508	chr1_134242015_134357186_R	circRNA	Yes	chr1	134242015	134357186	-	693	115171	5	0,3215,108145,109063,115067	199,104,87,199,104	134242015,134245230,134350160,134351078,134357082	134242214,134245334,134350247,134351277,134357186	PREDICTED.4033.12	chr1:134240591-134242015|chr1:134357186-134358623	2	0	0	0	0	0	0	0	0	0	0	0	0	1	0	0	0	0	0	0	0	0	0	0	0	2.08991	0	0	0	0	0	0	0
mmu_circ_000509	chr1_134282949_134289766_F	circRNA	Yes	chr1	134282949	134289766	+	177	6817	2	0,6694	54,123	134282949,134289643	134283003,134289766	PREDICTED.6403.4	chr1:134255147-134282949|chr1:134289766-134294353	0	0	0	0	2	0	0	0	0	0	0	0	0	0	0	0	0	0	0	0	0	0	0	0	0	0	0	0	0	0	0	0	0
mmu_circ_000510	chr1_134294353_134299447_F	circRNA	Yes	chr1	134294353	134299447	+	304	5094	3	0,4431,5001	102,109,93	134294353,134298784,134299354	134294455,134298893,134299447	ENSMMUT00000045789	chr1:134289766-134294353|chr1:134299447-134301028	0	0	0	0	1	1	0	0	0	0	0	0	2	0	0	0	1	0	0	0	0	0	0	0	0	0	0	1.37714	0	0	0	0	0
mmu_circ_000512	chr1_134298784_134299447_F	circRNA	Yes	chr1	134298784	134299447	+	202	663	2	0,570	109,93	134298784,134299354	134298893,134299447	ENSMMUT00000045790	chr1:134294455-134298784|chr1:134299447-134301028	1	3	0	3	1	0	4	0	1	0	1	2	0	2	1	3	1	2	0	0	0	1	1	0	0	1.04496	3.9613	0	4.65518	0	0.430566	0	1.41057
mmu_circ_000513	chr1_134298784_134301159_F	circRNA	Yes	chr1	134298784	134301159	+	333	2375	3	0,570,2244	109,93,131	134298784,134299354,134301028	134298893,134299447,134301159	ENSMMUT00000045790	chr1:134294455-134298784|chr1:134301159-134302434	1	0	0	0	0	1	0	1	0	0	0	0	1	0	0	0	0	0	0	0	0	0	0	0	0	1.04496	0	0.688568	0	0	0	0	0
mmu_circ_000516	chr1_134328463_134332578_R	circRNA	Yes	chr1	134328463	134332578	-	606	4115	4	0,222,933,3917	120,144,144,198	134328463,134328685,134329396,134332380	134328583,134328829,134329540,134332578	PREDICTED.3798.1	chr1:134325551-134328463|chr1:134332578-134334391	0	0	0	0	0	0	0	0	0	0	0	0	0	0	0	1	1	0	0	0	0	0	0	0	0	0	0	0	0	0	0	0	0
mmu_circ_000518	chr1_134344850_134346991_R	circRNA	Yes	chr1	134344850	134346991	-	296	2141	2	0,1996	151,145	134344850,134346846	134345001,134346991	PREDICTED.3723.1	chr1:134339799-134344850|chr1:134346991-134348770	0	0	0	1	0	0	0	0	1	0	0	0	0	0	0	0	0	0	0	0	0	0	0	0	0	0	0	0	0	0	0	0	0
mmu_circ_000519	chr1_134344850_134350247_R	circRNA	Yes*	chr1	134344850	134350247	-	555	5397	4	0,1996,3920,5310	151,145,172,87	134344850,134346846,134348770,134350160	134345001,134346991,134348942,134350247	PREDICTED.3723.1	chr1:134339799-134344850|chr1:134350247-134351078	1	0	0	0	0	0	0	0	0	0	0	0	0	0	0	0	0	0	0	0	0	0	0	0	0	1.04496	0	0	0	0	0	0	0
mmu_circ_000520	chr1_134344850_134351277_R	circRNA	Yes	chr1	134344850	134351277	-	754	6427	5	0,1996,3920,5310,6228	151,145,172,87,199	134344850,134346846,134348770,134350160,134351078	134345001,134346991,134348942,134350247,134351277	PREDICTED.3723.1	chr1:134339799-134344850|chr1:134351277-134357082	0	0	0	0	0	0	0	1	1	0	0	0	1	0	2	0	0	1	2	0	1	0	0	0	1.22719	0	0	0.688568	0	0	0	0	0.705287
mmu_circ_000522	chr1_134346846_134350247_R	circRNA	Yes	chr1	134346846	134350247	-	404	3401	3	0,1924,3314	145,172,87	134346846,134348770,134350160	134346991,134348942,134350247	PREDICTED.3723.1	chr1:134345001-134346846|chr1:134350247-134351078	0	0	1	0	2	1	0	0	0	0	0	0	3	1	1	0	0	0	0	1	1	0	0	0	0	0	0	2.0657	0	0.993085	0	0	0
mmu_circ_000524	chr1_134346846_134351277_R	circRNA	Yes	chr1	134346846	134351277	-	603	4431	4	0,1924,3314,4232	145,172,87,199	134346846,134348770,134350160,134351078	134346991,134348942,134350247,134351277	PREDICTED.3723.1	chr1:134345001-134346846|chr1:134351277-134357082	1	0	2	0	2	1	3	1	1	0	0	0	0	1	1	0	0	4	0	0	3	0	0	1	0	1.04496	2.97097	0	0	1.98617	0	0.401374	2.82115
mmu_circ_000525	chr1_13434765_13439568_F	circRNA	Yes	chr1	13434765	13439568	+	284	4803	3	0,1448,4694	119,56,109	13434765,13436213,13439459	13434884,13436269,13439568	PREDICTED.756.1	chr1:13432266-13434765|chr1:13439568-13441702	0	0	0	0	0	0	0	0	0	0	1	0	0	0	0	0	2	0	0	0	0	0	0	0	0	0	0	0	0	0	0	0	0
mmu_circ_000526	chr1_13434765_13442657_F	circRNA	Yes	chr1	13434765	13442657	+	436	7892	5	0,1448,4694,6937,7807	119,56,109,67,85	13434765,13436213,13439459,13441702,13442572	13434884,13436269,13439568,13441769,13442657	PREDICTED.387.2	chr1:13432266-13434765|chr1:13442657-13445975	0	0	0	0	1	0	0	0	0	0	0	0	0	1	0	0	0	0	0	0	0	0	0	0	0	0	0	0	0	0	0	0	0
mmu_circ_000529	chr1_134351078_134357186_R	circRNA	Yes	chr1	134351078	134357186	-	303	6108	2	0,6004	199,104	134351078,134357082	134351277,134357186	PREDICTED.3798.1	chr1:134350247-134351078|chr1:134357186-134358623	0	0	0	0	0	0	1	0	0	0	0	0	0	0	0	1	0	0	0	0	0	0	0	0	0	0	0.990325	0	0	0	0	0	0
mmu_circ_000533	chr1_134386852_134393310_R	circRNA	Yes	chr1	134386852	134393310	-	509	6458	4	0,853,1663,6266	51,75,191,192	134386852,134387705,134388515,134393118	134386903,134387780,134388706,134393310	PREDICTED.3723.1	chr1:134382314-134386852|chr1:134393310-134417746	5	0	0	0	2	0	1	0	0	0	0	1	2	0	1	0	0	0	1	1	0	0	0	0	0.613597	5.22478	0.990325	1.37714	0	0	0	0	0
mmu_circ_000534	chr1_134475802_134476296_R	circRNA	Yes	chr1	134475802	134476296	-	266	494	2	0,420	192,74	134475802,134476222	134475994,134476296	ENSMMUT00000026531	chr1:134472346-134475802|chr1:134476296-134482254	0	0	0	0	0	0	0	1	0	0	0	0	0	0	1	0	0	0	0	0	0	0	0	0	0	0	0	0	0	0	0	0	0
mmu_circ_000536	chr1_134494436_134494980_R	circRNA	Yes	chr1	134494436	134494980	-	312	544	2	0,486	254,58	134494436,134494922	134494690,134494980	ENSMMUT00000045758	chr1:134489483-134494436|chr1:134494980-134497650	0	0	0	1	0	0	0	0	0	0	0	0	0	0	0	0	0	0	0	0	2	0	0	0	0	0	0	0	0	0	0	0	0
mmu_circ_000537	chr1_134500981_134501463_R	circRNA	Yes	chr1	134500981	134501463	-	217	482	2	0,429	164,53	134500981,134501410	134501145,134501463	PREDICTED.3105.5	chr1:134500140-134500981|chr1:134501463-134503756	0	0	0	0	0	0	0	0	0	0	0	0	2	0	0	0	0	0	0	0	0	0	0	0	0	0	0	1.37714	0	0	0	0	0
mmu_circ_000538	chr1_134503756_134504300_R	circRNA	Yes*	chr1	134503756	134504300	-	209	544	2	0,415	80,129	134503756,134504171	134503836,134504300	ENSMMUT00000006575	chr1:134501463-134503756|chr1:134504300-134508566	1	0	0	0	0	0	0	0	0	0	0	0	0	0	0	0	0	0	0	0	0	0	0	0	0	1.04496	0	0	0	0	0	0	0
mmu_circ_000542	chr1_13455072_13462032_F	circRNA	Yes	chr1	13455072	13462032	+	697	6960	5	0,1077,3030,6411,6720	115,134,62,146,240	13455072,13456149,13458102,13461483,13461792	13455187,13456283,13458164,13461629,13462032	PREDICTED.387.2	chr1:13446081-13455072|chr1:13462032-13466187	0	0	0	0	0	0	2	0	0	0	0	0	0	0	0	0	0	0	0	0	0	0	0	0	0	0	1.98065	0	0	0	0	0	0
mmu_circ_000544	chr1_13458102_13462032_F	circRNA	Yes	chr1	13458102	13462032	+	448	3930	3	0,3381,3690	62,146,240	13458102,13461483,13461792	13458164,13461629,13462032	ENSMMUT00000003062	chr1:13456283-13458102|chr1:13462032-13466187	0	0	0	0	0	0	0	2	0	0	1	0	0	0	0	0	1	0	0	0	4	0	0	0	0	0	0	0	0	0	0	0	0
mmu_circ_000547	chr1_13461483_13462032_F	circRNA	Yes	chr1	13461483	13462032	+	386	549	2	0,309	146,240	13461483,13461792	13461629,13462032	ENSMMUT00000003062	chr1:13458164-13461483|chr1:13462032-13466187	0	0	0	0	0	0	0	0	1	0	0	0	1	0	0	0	1	0	0	0	0	0	0	0	0	0	0	0.688568	0	0	0	0	0
mmu_circ_000548	chr1_13468011_13472535_F	circRNA	Yes	chr1	13468011	13472535	+	584	4524	4	0,3488,4002,4405	122,150,193,119	13468011,13471499,13472013,13472416	13468133,13471649,13472206,13472535	PREDICTED.756.1	chr1:13466259-13468011|chr1:13472535-13473556	0	0	0	0	0	0	0	0	0	0	0	0	0	1	0	0	1	0	0	0	0	0	0	0	0	0	0	0	0	0	0	0	0
mmu_circ_000551	chr1_134876296_134882030_R	circRNA	Yes	chr1	134876296	134882030	-	540	5734	5	0,743,1986,4801,5610	79,90,90,157,124	134876296,134877039,134878282,134881097,134881906	134876375,134877129,134878372,134881254,134882030	ENSMMUT00000000134	chr1:134871980-134876296|chr1:134882030-134883469	0	0	0	1	0	0	1	0	0	0	1	0	0	0	0	0	0	0	0	0	0	0	0	0	0	0	0.990325	0	0	0	0	0	0
mmu_circ_000553	chr1_134933813_134941828_R	circRNA	Yes	chr1	134933813	134941828	-	329	8015	4	0,6310,7809,7964	118,97,63,51	134933813,134940123,134941622,134941777	134933931,134940220,134941685,134941828	ENSMMUT00000045699	chr1:134929760-134933813|chr1:134941828-134943055	0	0	0	0	1	0	0	0	2	0	0	0	0	0	2	0	0	0	0	0	1	0	0	0	0	0	0	0	0	0	0	0	0
mmu_circ_000555	chr1_134940123_134941828_R	circRNA	Yes	chr1	134940123	134941828	-	211	1705	3	0,1499,1654	97,63,51	134940123,134941622,134941777	134940220,134941685,134941828	ENSMMUT00000045699	chr1:134933931-134940123|chr1:134941828-134943055	1	0	0	0	4	1	7	2	1	3	0	0	0	0	4	2	0	0	2	0	0	0	0	0	1.22719	1.04496	6.93227	0	0	0	0	0	0
mmu_circ_000556	chr1_134940123_134943117_R	circRNA	Yes	chr1	134940123	134943117	-	273	2994	4	0,1499,1654,2932	97,63,51,62	134940123,134941622,134941777,134943055	134940220,134941685,134941828,134943117	ENSMMUT00000045699	chr1:134933931-134940123|chr1:134943117-134945841	0	0	1	1	0	0	0	0	0	0	0	0	0	1	0	0	0	0	0	0	0	0	0	0	0	0	0	0	0	0.993085	0	0	0
mmu_circ_000558	chr1_13503916_13505745_F	circRNA	Yes	chr1	13503916	13505745	+	325	1829	2	0,1639	135,190	13503916,13505555	13504051,13505745	PREDICTED.368.1	chr1:13500651-13503916|chr1:13505745-13509960	0	0	0	0	0	1	0	0	0	0	0	0	2	0	0	0	1	1	0	0	0	0	0	0	0	0	0	1.37714	0	0	0	0	0.705287
mmu_circ_000561	chr1_135205644_135206706_R	circRNA	Yes*	chr1	135205644	135206706	-	391	1062	4	0,192,386,925	87,93,74,137	135205644,135205836,135206030,135206569	135205731,135205929,135206104,135206706	ENSMMUT00000003740	chr1:135203775-135205644|chr1:135206706-135208999	0	0	0	0	0	0	0	0	0	0	0	0	0	0	0	0	1	0	0	0	0	0	0	0	0	0	0	0	0	0	0	0	0
mmu_circ_000566	chr1_13735041_13735195_R	ciRNA	Yes	chr1	13735041	13735195	-	154	154	1	0	154	13735041	13735195	PREDICTED.992.3	chr1:13735016-13735195	0	0	0	0	0	0	0	1	0	0	0	0	0	2	1	0	0	0	0	0	1	0	0	0	0	0	0	0	0	0	0	0	0
mmu_circ_000568	chr1_137669101_137669383_R	circRNA	Yes	chr1	137669101	137669383	-	282	282	1	0	282	137669101	137669383	ENSMMUT00000006364	chr1:137664590-137669101|chr1:137669383-137672429	0	0	0	0	0	0	0	0	0	0	0	0	0	0	0	0	2	0	0	0	0	0	0	0	0	0	0	0	0	0	0	0	0
mmu_circ_000569	chr1_138743804_138744157_F	circRNA	Yes	chr1	138743804	138744157	+	165	353	2	0,293	105,60	138743804,138744097	138743909,138744157	PREDICTED.2769.1	chr1:138738770-138743804|chr1:138744157-138746091	0	0	0	0	0	0	0	0	0	1	0	0	0	0	0	0	0	0	1	0	0	0	0	0	0.613597	0	0	0	0	0	0	0	0
mmu_circ_000575	chr1_138758700_138758917_F	ciRNA	Yes	chr1	138758700	138758917	+	217	217	1	0	217	138758700	138758917	PREDICTED.2769.1	chr1:138758700-138758936	0	0	0	0	0	0	0	2	0	0	0	0	0	0	2	0	1	2	0	0	0	0	0	0	0	0	0	0	0	0	0	0	1.41057
mmu_circ_000576	chr1_138759813_138759958_F	ciRNA	Yes	chr1	138759813	138759958	+	145	145	1	0	145	138759813	138759958	PREDICTED.2769.1	chr1:138759813-138759998	0	0	0	1	0	0	0	0	0	0	0	0	0	1	0	0	2	0	0	0	0	0	0	0	0	0	0	0	0	0	0	0	0
mmu_circ_000577	chr1_138793090_138793595_F	circRNA	Yes	chr1	138793090	138793595	+	363	505	2	0,332	190,173	138793090,138793422	138793280,138793595	PREDICTED.2819.1	chr1:138789479-138793090|chr1:138793595-138795415	0	0	0	2	0	0	0	0	0	0	0	0	0	0	0	0	0	0	0	0	0	0	0	0	0	0	0	0	0	0	0	0	0
mmu_circ_000578	chr1_138803461_138803810_F	circRNA	Yes*	chr1	138803461	138803810	+	233	349	2	0,247	131,102	138803461,138803708	138803592,138803810	PREDICTED.3210.5	chr1:138799432-138803461|chr1:138803810-138803948	0	0	0	0	0	0	0	0	0	0	0	0	0	0	1	0	0	0	0	0	0	0	0	0	0	0	0	0	0	0	0	0	0
mmu_circ_000583	chr1_138846909_138854246_R	circRNA	Yes	chr1	138846909	138854246	-	350	7337	4	0,620,1150,7226	108,58,73,111	138846909,138847529,138848059,138854135	138847017,138847587,138848132,138854246	PREDICTED.5249.1	chr1:138844931-138846909|chr1:138854246-138858935	1	0	1	0	0	0	0	1	0	0	0	0	0	0	0	0	2	0	0	0	0	0	0	0	0	1.04496	0	0	0	0.993085	0	0	0
mmu_circ_000584	chr1_138854135_138859030_R	circRNA	Yes	chr1	138854135	138859030	-	206	4895	2	0,4800	111,95	138854135,138858935	138854246,138859030	PREDICTED.6055.3	chr1:138848132-138854135|chr1:138859030-138860398	2	0	0	0	0	0	0	0	0	0	0	1	0	0	0	0	0	0	0	0	0	0	0	0	0	2.08991	0	0	0	0	0	0	0
mmu_circ_000585	chr1_138854135_138865696_R	circRNA	Yes	chr1	138854135	138865696	-	1096	11561	5	0,4800,6263,7350,11486	111,95,141,674,75	138854135,138858935,138860398,138861485,138865621	138854246,138859030,138860539,138862159,138865696	PREDICTED.2443.3	chr1:138848132-138854135|chr1:138865696-138883029	1	0	0	0	0	0	0	0	0	0	0	0	0	0	1	0	0	0	0	0	0	0	0	1	0	1.04496	0	0	0	0	0	0.401374	0
mmu_circ_000587	chr1_138858935_138862159_R	circRNA	Yes	chr1	138858935	138862159	-	910	3224	3	0,1463,2550	95,141,674	138858935,138860398,138861485	138859030,138860539,138862159	PREDICTED.6055.3	chr1:138854246-138858935|chr1:138862159-138884187	0	1	1	0	0	0	0	0	0	0	0	1	0	1	0	0	0	0	0	0	0	0	0	0	0	0	0	0	1.55173	0.993085	0	0	0
mmu_circ_000588	chr1_138858935_138865696_R	circRNA	Yes	chr1	138858935	138865696	-	985	6761	4	0,1463,2550,6686	95,141,674,75	138858935,138860398,138861485,138865621	138859030,138860539,138862159,138865696	PREDICTED.2443.3	chr1:138854246-138858935|chr1:138865696-138883029	0	0	0	0	0	0	1	0	0	0	1	0	0	0	1	0	0	2	0	0	0	0	0	0	0	0	0.990325	0	0	0	0	0	1.41057
mmu_circ_000595	chr1_138941414_138950962_R	circRNA	Yes	chr1	138941414	138950962	-	320	9548	3	0,2420,9438	100,110,110	138941414,138943834,138950852	138941514,138943944,138950962	PREDICTED.3390.1	chr1:138932773-138941414|chr1:138950962-138952003	0	1	1	1	0	0	2	1	1	0	0	0	3	0	0	0	2	3	1	0	0	0	0	0	0.613597	0	1.98065	2.0657	1.55173	0.993085	0	0	2.11586
mmu_circ_000597	chr1_139775532_139775673_F	ciRNA	Yes	chr1	139775532	139775673	+	141	141	1	0	141	139775532	139775673	ENSMMUT00000045515	chr1:139775532-139775700	0	0	0	0	0	0	0	0	0	0	0	2	0	0	0	0	0	0	0	0	0	0	0	0	0	0	0	0	0	0	0	0	0
mmu_circ_000602	chr1_140364814_140387675_F	circRNA	Yes*	chr1	140364814	140387675	+	529	22861	5	0,5133,6555,19775,22746	132,114,100,68,115	140364814,140369947,140371369,140384589,140387560	140364946,140370061,140371469,140384657,140387675	PREDICTED.4183.2	chr1:140345462-140364814|chr1:140387675-140437281	0	0	0	0	0	1	0	0	0	0	0	0	0	0	0	0	0	0	0	0	0	0	0	0	0	0	0	0	0	0	0	0	0
mmu_circ_000606	chr1_141033845_141043620_F	circRNA	Yes	chr1	141033845	141043620	+	271	9775	3	0,9451,9676	95,77,99	141033845,141043296,141043521	141033940,141043373,141043620	PREDICTED.2247.2	chr1:141031320-141033845|chr1:141043620-141047282	2	0	0	1	0	0	0	2	0	0	0	0	0	0	1	0	0	0	0	0	0	0	0	0	0	2.08991	0	0	0	0	0	0	0
mmu_circ_000607	chr1_141033845_141047371_F	circRNA	Yes*	chr1	141033845	141047371	+	360	13526	4	0,9451,9676,13437	95,77,99,89	141033845,141043296,141043521,141047282	141033940,141043373,141043620,141047371	PREDICTED.2247.2	chr1:141031320-141033845|chr1:141047371-141052194	0	0	0	0	0	1	0	0	0	0	0	0	0	0	0	0	0	0	0	0	0	0	0	0	0	0	0	0	0	0	0	0	0
mmu_circ_000609	chr1_14123948_14127928_F	circRNA	Yes	chr1	14123948	14127928	+	476	3980	3	0,1524,3809	164,141,171	14123948,14125472,14127757	14124112,14125613,14127928	PREDICTED.449.1	chr1:14119798-14123948|chr1:14127928-14129579	0	0	0	0	0	0	0	0	0	0	0	0	2	0	0	1	0	1	0	0	1	0	0	0	0	0	0	1.37714	0	0	0	0	0.705287
mmu_circ_000614	chr1_14182017_14188748_R	circRNA	Yes	chr1	14182017	14188748	-	434	6731	5	0,1523,3413,3712,6624	74,85,72,96,107	14182017,14183540,14185430,14185729,14188641	14182091,14183625,14185502,14185825,14188748	PREDICTED.600.3	chr1:14181345-14182017|chr1:14188748-14189159	0	0	0	0	0	0	0	0	0	0	0	0	0	1	1	0	0	0	0	0	0	0	0	0	0	0	0	0	0	0	0	0	0
mmu_circ_000615	chr1_14185430_14185825_R	circRNA	Yes*	chr1	14185430	14185825	-	168	395	2	0,299	72,96	14185430,14185729	14185502,14185825	PREDICTED.154.3	chr1:14183625-14185430|chr1:14185825-14188641	0	0	0	0	0	0	0	1	0	0	0	0	0	0	0	0	0	0	0	0	0	0	0	0	0	0	0	0	0	0	0	0	0
mmu_circ_000616	chr1_14185430_14188748_R	circRNA	Yes	chr1	14185430	14188748	-	275	3318	3	0,299,3211	72,96,107	14185430,14185729,14188641	14185502,14185825,14188748	ENSMMUT00000027134	chr1:14183625-14185430|chr1:14188748-14189159	0	0	0	0	0	0	0	0	1	0	0	0	0	0	0	0	0	0	1	0	0	0	0	0	0.613597	0	0	0	0	0	0	0	0
mmu_circ_000617	chr1_14199902_14200919_R	circRNA	Yes	chr1	14199902	14200919	-	386	1017	3	0,439,912	115,166,105	14199902,14200341,14200814	14200017,14200507,14200919	ENSMMUT00000027134	chr1:14196870-14199902|chr1:14200919-14205255	0	0	0	0	0	0	1	0	1	0	0	0	0	0	0	0	0	0	0	0	0	0	0	0	0	0	0.990325	0	0	0	0	0	0
mmu_circ_000619	chr1_142010447_142010607_R	ciRNA	Yes	chr1	142010447	142010607	-	160	160	1	0	160	142010447	142010607	PREDICTED.7069.2	chr1:142010424-142010607	0	0	0	0	0	0	0	0	0	0	0	0	0	2	0	0	0	0	0	0	0	0	0	0	0	0	0	0	0	0	0	0	0
mmu_circ_000633	chr1_142064388_142065096_R	ciRNA	Yes	chr1	142064388	142065096	-	708	708	1	0	708	142064388	142065096	PREDICTED.45986.1	chr1:142064388-142065096	0	0	0	0	0	0	0	0	0	0	0	0	0	0	0	3	0	0	0	0	0	0	0	0	0	0	0	0	0	0	0	0	0
mmu_circ_000635	chr1_142073777_142074235_R	circRNA	Yes	chr1	142073777	142074235	-	273	458	2	0,261	76,197	142073777,142074038	142073853,142074235	ENSMMUT00000023723	chr1:142067543-142073777|chr1:142074235-142074946	9	11	8	12	8	9	7	21	21	5	7	25	16	29	14	12	17	33	0	0	16	4	12	2	0	9.4046	6.93227	11.0171	17.069	7.94468	1.72226	0.802748	23.2745
mmu_circ_000637	chr1_142079303_142079567_R	circRNA	Yes	chr1	142079303	142079567	-	264	264	1	0	264	142079303	142079567	ENSMMUT00000032495	chr1:142078943-142079303|chr1:142079567-142083383	0	0	0	0	0	0	0	0	0	0	0	0	0	1	0	0	2	1	0	0	0	0	0	0	0	0	0	0	0	0	0	0	0.705287
mmu_circ_000640	chr1_142079303_142088694_R	circRNA	Yes	chr1	142079303	142088694	-	1320	9391	5	0,4080,4700,5492,9127	264,264,264,264,264	142079303,142083383,142084003,142084795,142088430	142079567,142083647,142084267,142085059,142088694	ENSMMUT00000032495	chr1:142078943-142079303|chr1:142088694-142089059	0	0	1	0	0	0	0	0	0	0	0	0	0	0	1	0	0	0	0	0	0	0	0	0	0	0	0	0	0	0.993085	0	0	0
mmu_circ_000641	chr1_142084003_142090119_R	circRNA	Yes	chr1	142084003	142090119	-	1320	6116	5	0,792,4427,5056,5852	264,264,264,264,264	142084003,142084795,142088430,142089059,142089855	142084267,142085059,142088694,142089323,142090119	ENSMMUT00000032495	chr1:142083647-142084003|chr1:142090119-142090684	0	0	0	1	0	0	0	0	0	0	0	0	0	0	1	1	0	2	0	0	1	0	0	0	0	0	0	0	0	0	0	0	1.41057
mmu_circ_000645	chr1_142088430_142090119_R	circRNA	Yes	chr1	142088430	142090119	-	792	1689	3	0,629,1425	264,264,264	142088430,142089059,142089855	142088694,142089323,142090119	ENSMMUT00000023723	chr1:142076885-142088430|chr1:142090119-142090684	0	0	0	1	0	0	0	0	0	0	0	0	0	0	0	0	1	0	0	0	0	0	0	0	0	0	0	0	0	0	0	0	0
mmu_circ_000647	chr1_142094520_142096635_R	circRNA	Yes	chr1	142094520	142096635	-	1062	2115	4	0,567,931,1848	264,264,267,267	142094520,142095087,142095451,142096368	142094784,142095351,142095718,142096635	ENSMMUT00000023723	chr1:142091573-142094520|chr1:142096635-142097054	0	5	6	14	6	0	7	4	1	3	22	3	10	0	3	14	0	4	0	0	4	0	1	3	0	0	6.93227	6.88568	7.75863	5.95851	0	1.20412	2.82115
mmu_circ_000648	chr1_142096657_142097054_R	ciRNA	Yes	chr1	142096657	142097054	-	397	397	1	0	397	142096657	142097054	ENSMMUT00000023723	chr1:142096635-142097054	0	0	1	0	0	0	1	3	2	0	0	0	0	5	0	0	0	2	0	0	0	0	0	0	0	0	0.990325	0	0	0.993085	0	0	1.41057
mmu_circ_000649	chr1_142096658_142097054_R	ciRNA	Yes	chr1	142096658	142097054	-	396	396	1	0	396	142096658	142097054	ENSMMUT00000023723	chr1:142096635-142097054	2	0	0	1	0	2	0	0	0	0	0	0	3	0	6	0	0	4	0	0	1	1	0	0	0	2.08991	0	2.0657	0	0	0.430566	0	2.82115
mmu_circ_000650	chr1_142096660_142097054_R	ciRNA	Yes	chr1	142096660	142097054	-	394	394	1	0	394	142096660	142097054	PREDICTED.17188.1	chr1:142096635-142097054	0	2	0	1	0	0	0	0	0	0	0	0	0	0	0	0	0	0	0	0	0	0	0	0	0	0	0	0	3.10345	0	0	0	0
mmu_circ_000653	chr1_142101164_142101437_R	circRNA	Yes	chr1	142101164	142101437	-	273	273	1	0	273	142101164	142101437	ENSMMUT00000023723	chr1:142100352-142101164|chr1:142101437-142102502	0	0	0	0	0	1	0	0	0	0	0	0	1	0	0	0	0	0	0	0	0	0	0	0	0	0	0	0.688568	0	0	0	0	0
mmu_circ_000655	chr1_142106399_142106587_R	ciRNA	Yes	chr1	142106399	142106587	-	188	188	1	0	188	142106399	142106587	ENSMMUT00000023723	chr1:142106374-142106587	0	0	0	0	0	0	0	2	0	0	0	1	0	0	1	0	0	0	0	0	0	0	0	0	0	0	0	0	0	0	0	0	0
mmu_circ_000656	chr1_142106402_142106587_R	ciRNA	Yes	chr1	142106402	142106587	-	185	185	1	0	185	142106402	142106587	ENSMMUT00000023723	chr1:142106374-142106587	0	0	0	0	1	0	0	0	0	0	0	0	0	0	1	1	1	1	0	0	0	0	1	0	0	0	0	0	0	0	0	0	0.705287
mmu_circ_000657	chr1_142118255_142125764_R	circRNA	Yes	chr1	142118255	142125764	-	552	7509	2	0,7233	276,276	142118255,142125488	142118531,142125764	ENSMMUT00000023723	chr1:142114124-142118255|chr1:142125764-142136117	0	0	1	0	0	0	0	0	0	1	0	0	1	0	1	0	1	0	0	0	2	0	0	0	0	0	0	0.688568	0	0.993085	0	0	0
mmu_circ_000659	chr1_142125488_142157486_R	circRNA	Yes	chr1	142125488	142157486	-	1380	31998	5	0,10629,11715,12828,31722	276,276,276,276,276	142125488,142136117,142137203,142138316,142157210	142125764,142136393,142137479,142138592,142157486	ENSMMUT00000023723	chr1:142118531-142125488|chr1:142157486-142164890	0	0	0	0	0	0	0	0	0	0	2	0	0	0	0	0	0	0	0	0	0	0	0	0	0	0	0	0	0	0	0	0	0
mmu_circ_000663	chr1_142162648_142162924_R	circRNA	Yes	chr1	142162648	142162924	-	276	276	1	0	276	142162648	142162924	PREDICTED.11673.1	chr1:142157486-142162648|chr1:142162924-142164890	0	0	0	0	0	0	0	0	0	0	0	0	0	0	0	0	1	0	0	0	0	0	0	1	0	0	0	0	0	0	0	0.401374	0
mmu_circ_000664	chr1_142165475_142165757_R	circRNA	Yes	chr1	142165475	142165757	-	282	282	1	0	282	142165475	142165757	ENSMMUT00000023723	chr1:142165166-142165475|chr1:142165757-142166391	0	0	0	0	0	0	0	1	0	0	0	0	0	0	1	0	0	0	0	0	0	0	0	0	0	0	0	0	0	0	0	0	0
mmu_circ_000666	chr1_142285647_142285768_R	ciRNA	Yes	chr1	142285647	142285768	-	121	121	1	0	121	142285647	142285768	ENSMMUT00000003961	chr1:142285624-142285768	1	0	0	1	2	1	1	7	0	0	0	1	0	2	0	1	4	0	0	0	1	0	2	0	0	1.04496	0.990325	0	0	0	0	0	0
mmu_circ_000670	chr1_142591942_142599981_R	circRNA	Yes	chr1	142591942	142599981	-	616	8039	2	0,7548	125,491	142591942,142599490	142592067,142599981	ENSMMUT00000045424	chr1:142588417-142591942|chr1:142599981-142610506	0	0	0	0	0	0	1	2	0	0	0	0	0	0	0	0	0	0	0	0	0	0	0	0	0	0	0.990325	0	0	0	0	0	0
mmu_circ_000672	chr1_142610506_142611048_R	circRNA	Yes	chr1	142610506	142611048	-	542	542	1	0	542	142610506	142611048	ENSMMUT00000045424	chr1:142599981-142610506|chr1:142611048-142626549	0	0	1	0	0	0	0	0	0	0	0	0	2	0	1	1	0	0	0	0	1	0	0	0	0	0	0	1.37714	0	0.993085	0	0	0
mmu_circ_000673	chr1_142660889_142661582_F	circRNA	Yes	chr1	142660889	142661582	+	244	693	2	0,610	161,83	142660889,142661499	142661050,142661582	PREDICTED.3927.3	chr1:142659140-142660889|chr1:142661582-142668788	6	0	0	2	0	3	4	0	0	0	0	0	4	0	5	0	4	0	1	0	0	0	0	0	0.613597	6.26973	3.9613	2.75427	0	0	0	0	0
mmu_circ_000676	chr1_143113906_143181753_F	circRNA	Yes	chr1	143113906	143181753	+	421	67847	4	0,51456,61952,67698	92,84,96,149	143113906,143165362,143175858,143181604	143113998,143165446,143175954,143181753	PREDICTED.3792.1	chr1:143056238-143113906|chr1:143181753-143209632	0	0	0	1	0	0	0	0	0	0	0	0	1	1	0	0	0	1	0	0	0	0	0	0	0	0	0	0.688568	0	0	0	0	0.705287
mmu_circ_000677	chr1_143113906_143209726_F	circRNA	Yes	chr1	143113906	143209726	+	515	95820	5	0,51456,61952,67698,95726	92,84,96,149,94	143113906,143165362,143175858,143181604,143209632	143113998,143165446,143175954,143181753,143209726	PREDICTED.2498.1	chr1:143056238-143113906|chr1:143209726-143223039	0	2	0	0	0	0	0	0	0	0	0	0	0	0	0	0	0	0	0	0	0	0	0	0	0	0	0	0	3.10345	0	0	0	0
mmu_circ_000679	chr1_143165362_143181753_F	circRNA	Yes	chr1	143165362	143181753	+	329	16391	3	0,10496,16242	84,96,149	143165362,143175858,143181604	143165446,143175954,143181753	ENSMMUT00000045419	chr1:143113998-143165362|chr1:143181753-143209632	0	0	0	0	2	2	0	0	0	0	1	0	0	2	3	1	0	0	0	0	0	0	0	0	0	0	0	0	0	0	0	0	0
mmu_circ_000680	chr1_143165362_143209726_F	circRNA	Yes	chr1	143165362	143209726	+	423	44364	4	0,10496,16242,44270	84,96,149,94	143165362,143175858,143181604,143209632	143165446,143175954,143181753,143209726	PREDICTED.3961.1	chr1:143113998-143165362|chr1:143209726-143223039	0	0	0	0	0	0	0	1	0	0	0	0	0	1	0	0	1	0	0	0	0	0	0	0	0	0	0	0	0	0	0	0	0
mmu_circ_000681	chr1_143223039_143231149_F	circRNA	Yes*	chr1	143223039	143231149	+	697	8110	4	0,1822,4648,7943	201,249,80,167	143223039,143224861,143227687,143230982	143223240,143225110,143227767,143231149	PREDICTED.3663.3	chr1:143209726-143223039|chr1:143231149-143239538	0	0	0	0	0	0	0	0	0	1	0	0	0	0	0	0	0	0	0	0	0	0	0	0	0	0	0	0	0	0	0	0	0
mmu_circ_000683	chr1_143288905_143315381_F	circRNA	Yes*	chr1	143288905	143315381	+	661	26476	7	0,671,2409,4888,6025,22415,26392	106,149,92,77,48,105,84	143288905,143289576,143291314,143293793,143294930,143311320,143315297	143289011,143289725,143291406,143293870,143294978,143311425,143315381	PREDICTED.5611.1	chr1:143282351-143288905|chr1:143315381-143323381	0	0	0	0	0	0	0	0	0	0	1	0	0	0	0	0	0	0	0	0	0	0	0	0	0	0	0	0	0	0	0	0	0
mmu_circ_000685	chr1_143289576_143315381_F	circRNA	Yes	chr1	143289576	143315381	+	441	25805	5	0,1738,4217,14270,25721	149,92,77,39,84	143289576,143291314,143293793,143303846,143315297	143289725,143291406,143293870,143303885,143315381	PREDICTED.4085.3	chr1:143289011-143289576|chr1:143315381-143323381	3	0	0	0	0	0	0	0	0	0	0	0	0	0	0	0	0	0	0	0	0	0	0	0	0	3.13487	0	0	0	0	0	0	0
mmu_circ_000686	chr1_143289576_143315381_F	circRNA	Yes	chr1	143289576	143315381	+	507	25805	5	0,1738,4217,21744,25721	149,92,77,105,84	143289576,143291314,143293793,143311320,143315297	143289725,143291406,143293870,143311425,143315381	PREDICTED.6142.6	chr1:143289011-143289576|chr1:143315381-143323381	0	0	2	0	0	0	0	0	0	0	0	0	0	0	0	0	0	0	0	0	0	0	1	0	0	0	0	0	0	1.98617	0	0	0
mmu_circ_000687	chr1_143293793_143323487_F	circRNA	Yes	chr1	143293793	143323487	+	267	29694	3	0,21504,29588	77,84,106	143293793,143315297,143323381	143293870,143315381,143323487	PREDICTED.3677.1	chr1:143291406-143293793|chr1:143323487-143327726	0	0	0	1	0	0	0	0	0	0	0	0	0	0	0	0	0	0	0	0	1	0	0	0	0	0	0	0	0	0	0	0	0
mmu_circ_000688	chr1_143293793_143323487_F	circRNA	Yes	chr1	143293793	143323487	+	306	29694	4	0,10053,21504,29588	77,39,84,106	143293793,143303846,143315297,143323381	143293870,143303885,143315381,143323487	ENSMMUT00000045419	chr1:143291406-143293793|chr1:143323487-143327726	4	0	0	0	0	0	0	0	0	0	0	0	0	0	6	0	0	1	0	0	0	0	0	0	0	4.17982	0	0	0	0	0	0	0.705287
mmu_circ_000689	chr1_143293793_143323487_F	circRNA	Yes	chr1	143293793	143323487	+	372	29694	4	0,17527,21504,29588	77,105,84,106	143293793,143311320,143315297,143323381	143293870,143311425,143315381,143323487	PREDICTED.6142.6	chr1:143291406-143293793|chr1:143323487-143327726	0	0	0	0	0	0	2	2	0	0	0	0	2	0	0	0	4	0	0	0	0	0	2	0	0	0	1.98065	1.37714	0	0	0	0	0
mmu_circ_000690	chr1_143293793_143323487_F	circRNA	Yes	chr1	143293793	143323487	+	420	29694	5	0,1137,17527,21504,29588	77,48,105,84,106	143293793,143294930,143311320,143315297,143323381	143293870,143294978,143311425,143315381,143323487	ENSMMUT00000045417	chr1:143291406-143293793|chr1:143323487-143327726	0	0	0	0	0	0	0	0	0	2	0	0	0	0	0	0	0	0	0	0	0	0	0	0	0	0	0	0	0	0	0	0	0
mmu_circ_000693	chr1_143311320_143315381_F	circRNA	Yes	chr1	143311320	143315381	+	189	4061	2	0,3977	105,84	143311320,143315297	143311425,143315381	PREDICTED.2498.1	chr1:143293870-143311320|chr1:143315381-143323381	0	1	0	0	0	0	0	0	0	0	0	0	0	1	0	0	0	0	0	0	0	0	0	0	0	0	0	0	1.55173	0	0	0	0
mmu_circ_000698	chr1_143352880_143364776_F	circRNA	Yes	chr1	143352880	143364776	+	360	11896	3	0,815,11778	124,118,118	143352880,143353695,143364658	143353004,143353813,143364776	ENSMMUT00000045419	chr1:143346701-143352880|chr1:143364776-143374993	0	0	0	0	0	1	0	0	0	0	0	1	0	0	0	0	0	0	0	0	0	0	0	0	0	0	0	0	0	0	0	0	0
mmu_circ_000701	chr1_143385589_143385870_R	ciRNA	Yes*	chr1	143385589	143385870	-	281	281	1	0	281	143385589	143385870	ENSMMUT00000012079	chr1:143385560-143385870	0	0	0	0	0	0	0	0	0	0	0	1	0	0	0	0	0	0	0	0	0	0	0	0	0	0	0	0	0	0	0	0	0
mmu_circ_000702	chr1_143385590_143385870_R	ciRNA	Yes	chr1	143385590	143385870	-	280	280	1	0	280	143385590	143385870	ENSMMUT00000012079	chr1:143385560-143385870	2	0	1	6	2	0	2	5	1	0	1	0	3	0	7	6	7	7	0	0	3	0	0	1	0	2.08991	1.98065	2.0657	0	0.993085	0	0.401374	4.93701
mmu_circ_000703	chr1_143385955_143386154_R	ciRNA	Yes	chr1	143385955	143386154	-	199	199	1	0	199	143385955	143386154	ENSMMUT00000012079	chr1:143385936-143386154	0	0	0	1	1	0	0	0	0	0	0	0	0	0	0	0	0	0	0	0	0	0	0	0	0	0	0	0	0	0	0	0	0
mmu_circ_000704	chr1_143405314_143409761_R	circRNA	Yes	chr1	143405314	143409761	-	664	4447	3	0,327,4261	67,411,186	143405314,143405641,143409575	143405381,143406052,143409761	ENSMMUT00000012079	chr1:143392918-143405314|chr1:143409761-143428831	7	0	0	5	0	0	3	1	2	3	4	1	6	5	0	0	5	2	2	0	6	1	3	0	1.22719	7.31469	2.97097	4.13141	0	0	0.430566	0	1.41057
mmu_circ_000705	chr1_143405314_143409761_R	circRNA	Yes	chr1	143405314	143409761	-	658	4447	3	0,327,4267	67,411,180	143405314,143405641,143409581	143405381,143406052,143409761	PREDICTED.2744.1	chr1:143392918-143405314|chr1:143409761-143425469	0	0	0	0	0	0	0	0	0	0	0	0	0	0	6	0	0	0	0	0	0	0	0	0	0	0	0	0	0	0	0	0	0
mmu_circ_000706	chr1_143405641_143409761_R	circRNA	Yes	chr1	143405641	143409761	-	597	4120	2	0,3934	411,186	143405641,143409575	143406052,143409761	ENSMMUT00000012079	chr1:143405381-143405641|chr1:143409761-143428831	0	0	0	0	0	0	0	0	0	0	0	0	0	2	0	0	0	0	1	0	1	0	0	0	0.613597	0	0	0	0	0	0	0	0
mmu_circ_000709	chr1_144412073_144412566_F	circRNA	Yes	chr1	144412073	144412566	+	493	493	1	0	493	144412073	144412566	ENSMMUT00000024103	chr1:144409445-144412073|chr1:144412566-144414944	0	0	1	0	0	0	0	0	0	0	0	0	0	0	2	0	0	0	0	0	0	0	0	0	0	0	0	0	0	0.993085	0	0	0
mmu_circ_000711	chr1_144566571_144570090_R	circRNA	Yes	chr1	144566571	144570090	-	369	3519	2	0,3331	181,188	144566571,144569902	144566752,144570090	PREDICTED.5498.1	chr1:144557959-144566571|chr1:144570090-144574082	0	0	0	0	0	1	0	0	0	0	0	0	0	1	0	0	0	0	0	0	0	0	0	0	0	0	0	0	0	0	0	0	0
mmu_circ_000713	chr1_144827957_144864467_F	circRNA	Yes	chr1	144827957	144864467	+	429	36510	3	0,12091,36425	166,178,85	144827957,144840048,144864382	144828123,144840226,144864467	PREDICTED.3617.1	chr1:144792345-144827957|chr1:144864467-144875271	0	0	0	0	0	0	0	0	0	0	0	0	0	0	1	0	0	1	0	0	2	0	0	0	0	0	0	0	0	0	0	0	0.705287
mmu_circ_000716	chr1_144979126_144982349_F	circRNA	Yes*	chr1	144979126	144982349	+	247	3223	2	0,3031	55,192	144979126,144982157	144979181,144982349	ENSMMUT00000004915	chr1:144976464-144979126|chr1:144982349-144983347	1	0	0	0	0	0	0	0	0	0	0	0	0	0	0	0	0	0	0	0	0	0	0	0	0	1.04496	0	0	0	0	0	0	0
mmu_circ_000724	chr1_146109263_146114792_R	circRNA	Yes	chr1	146109263	146114792	-	254	5529	2	0,5416	141,113	146109263,146114679	146109404,146114792	ENSMMUT00000013871	chr1:146104795-146109263|chr1:146114792-146120777	4	1	1	0	0	0	4	2	2	2	0	2	4	6	0	0	9	0	0	0	1	0	0	1	0	4.17982	3.9613	2.75427	1.55173	0.993085	0	0.401374	0
mmu_circ_000725	chr1_146109263_146114792_R	circRNA	Yes	chr1	146109263	146114792	-	207	5529	2	0,5416	94,113	146109263,146114679	146109357,146114792	PREDICTED.3602.1	chr1:146104795-146109263|chr1:146114792-146120777	0	0	0	0	0	0	0	0	0	0	0	0	0	0	0	0	0	4	0	0	0	0	0	0	0	0	0	0	0	0	0	0	2.82115
mmu_circ_000726	chr1_146180999_146225621_F	circRNA	Yes	chr1	146180999	146225621	+	1898	44622	14	0,3651,6708,7062,8080,11247,15313,17244,21853,23571,26556,31878,37518,44522	58,273,133,77,135,102,118,145,250,219,105,63,120,100	146180999,146184650,146187707,146188061,146189079,146192246,146196312,146198243,146202852,146204570,146207555,146212877,146218517,146225521	146181057,146184923,146187840,146188138,146189214,146192348,146196430,146198388,146203102,146204789,146207660,146212940,146218637,146225621	ENSMMUT00000031669	chr1:146175427-146180999|chr1:146225621-146243891	2	0	0	0	0	0	0	0	0	0	0	0	0	0	0	0	0	0	0	0	0	0	0	0	0	2.08991	0	0	0	0	0	0	0
mmu_circ_000728	chr1_146202852_146243998_F	circRNA	Yes*	chr1	146202852	146243998	+	964	41146	7	0,1718,4703,10025,15665,22669,41039	250,219,105,63,120,100,107	146202852,146204570,146207555,146212877,146218517,146225521,146243891	146203102,146204789,146207660,146212940,146218637,146225621,146243998	PREDICTED.3846.3	chr1:146198388-146202852|chr1:146243998-146258493	0	0	0	0	0	0	0	0	0	0	0	0	0	0	0	1	0	0	0	0	0	0	0	0	0	0	0	0	0	0	0	0	0
mmu_circ_000731	chr1_146212877_146225621_F	circRNA	Yes	chr1	146212877	146225621	+	283	12744	3	0,5640,12644	63,120,100	146212877,146218517,146225521	146212940,146218637,146225621	ENSMMUT00000031669	chr1:146207660-146212877|chr1:146225621-146243891	0	0	0	0	0	0	0	1	0	0	0	0	0	0	0	0	2	0	0	0	0	0	0	0	0	0	0	0	0	0	0	0	0
mmu_circ_000732	chr1_146212877_146243998_F	circRNA	Yes	chr1	146212877	146243998	+	390	31121	4	0,5640,12644,31014	63,120,100,107	146212877,146218517,146225521,146243891	146212940,146218637,146225621,146243998	ENSMMUT00000031669	chr1:146207660-146212877|chr1:146243998-146258493	0	1	0	0	0	0	0	0	0	0	0	0	0	0	0	0	0	2	0	0	0	0	0	0	0	0	0	0	1.55173	0	0	0	1.41057
mmu_circ_000736	chr1_146518560_146522293_F	circRNA	Yes	chr1	146518560	146522293	+	197	3733	2	0,3650	114,83	146518560,146522210	146518674,146522293	ENSMMUT00000015578	chr1:146511837-146518560|chr1:146522293-146525740	0	0	0	0	0	0	0	0	0	0	0	0	0	2	1	0	0	0	0	0	0	0	0	0	0	0	0	0	0	0	0	0	0
mmu_circ_000737	chr1_146518560_146528508_F	circRNA	Yes*	chr1	146518560	146528508	+	474	9948	4	0,3650,7180,9773	114,83,102,175	146518560,146522210,146525740,146528333	146518674,146522293,146525842,146528508	PREDICTED.2805.3	chr1:146511837-146518560|chr1:146528508-146529251	0	0	0	0	0	0	0	0	0	0	0	0	0	0	1	0	0	0	0	0	0	0	0	0	0	0	0	0	0	0	0	0	0
mmu_circ_000739	chr1_146532748_146534900_F	circRNA	Yes	chr1	146532748	146534900	+	612	2152	2	0,1689	149,463	146532748,146534437	146532897,146534900	ENSMMUT00000015578	chr1:146532000-146532748|chr1:146534900-146536921	0	0	0	0	0	1	0	0	0	1	0	0	0	0	0	0	0	0	0	0	0	0	0	0	0	0	0	0	0	0	0	0	0
mmu_circ_000742	chr1_146986198_146990276_F	circRNA	Yes	chr1	146986198	146990276	+	363	4078	2	0,3889	174,189	146986198,146990087	146986372,146990276	PREDICTED.6232.7	chr1:146958826-146986198|chr1:146990276-147025404	0	0	0	0	0	0	0	1	0	0	0	0	0	0	0	1	0	0	0	0	0	0	1	0	0	0	0	0	0	0	0	0	0
mmu_circ_000743	chr1_147545542_147547017_R	circRNA	Yes*	chr1	147545542	147547017	-	179	1475	2	0,1402	106,73	147545542,147546944	147545648,147547017	PREDICTED.3614.3	chr1:147543924-147545542|chr1:147547017-147548710	0	0	0	0	0	0	0	0	0	0	0	0	0	0	0	0	0	1	0	0	0	0	0	0	0	0	0	0	0	0	0	0	0.705287
mmu_circ_000749	chr1_149558483_149559790_R	circRNA	Yes	chr1	149558483	149559790	-	304	1307	2	0,1144	141,163	149558483,149559627	149558624,149559790	ENSMMUT00000021710	chr1:149540591-149558483|chr1:149559790-149566360	2	0	0	0	0	0	0	0	0	0	0	0	0	1	4	0	0	0	0	0	0	0	0	0	0	2.08991	0	0	0	0	0	0	0
mmu_circ_000753	chr1_150178935_150180781_F	circRNA	Yes*	chr1	150178935	150180781	+	440	1846	3	0,1170,1752	128,218,94	150178935,150180105,150180687	150179063,150180323,150180781	PREDICTED.2617.2	chr1:150177004-150178935|chr1:150180781-150190267	0	0	0	1	0	0	0	0	0	0	0	0	0	0	0	0	0	0	0	0	0	0	0	0	0	0	0	0	0	0	0	0	0
mmu_circ_000758	chr1_150223356_150225994_R	circRNA	Yes	chr1	150223356	150225994	-	364	2638	3	0,1072,2535	132,129,103	150223356,150224428,150225891	150223488,150224557,150225994	ENSMMUT00000010899	chr1:150221917-150223356|chr1:150225994-150228584	2	0	0	1	0	0	2	0	0	0	0	0	1	0	0	0	3	1	1	0	0	1	2	0	0.613597	2.08991	1.98065	0.688568	0	0	0.430566	0	0.705287
mmu_circ_000759	chr1_150223356_150225994_R	circRNA	Yes	chr1	150223356	150225994	-	315	2638	3	0,1121,2535	132,80,103	150223356,150224477,150225891	150223488,150224557,150225994	PREDICTED.3763.1	chr1:150221917-150223356|chr1:150225994-150228584	0	0	0	0	1	0	0	2	0	0	0	0	0	0	0	0	0	0	0	2	0	0	0	0	0	0	0	0	0	0	0	0	0
mmu_circ_000766	chr1_15109465_15109790_F	circRNA	Yes	chr1	15109465	15109790	+	217	325	2	0,217	109,108	15109465,15109682	15109574,15109790	PREDICTED.417.1	chr1:15107301-15109465|chr1:15109790-15111779	0	0	0	0	0	1	1	0	0	0	0	0	2	0	0	0	0	1	0	0	0	0	0	0	0	0	0.990325	1.37714	0	0	0	0	0.705287
mmu_circ_000767	chr1_15112216_15112337_F	ciRNA	Yes	chr1	15112216	15112337	+	121	121	1	0	121	15112216	15112337	PREDICTED.968.1	chr1:15112216-15112361	0	0	3	0	1	0	1	3	0	0	2	0	2	2	1	1	0	1	0	0	0	0	0	0	0	0	0.990325	1.37714	0	2.97926	0	0	0.705287
mmu_circ_000774	chr1_15382821_15385226_F	circRNA	Yes*	chr1	15382821	15385226	+	302	2405	2	0,2274	171,131	15382821,15385095	15382992,15385226	PREDICTED.550.2	chr1:15382056-15382821|chr1:15385226-15387102	1	0	0	0	0	0	0	0	0	0	0	0	0	0	0	0	0	0	0	0	0	0	0	0	0	1.04496	0	0	0	0	0	0	0
mmu_circ_000777	chr1_15433204_15437124_F	circRNA	Yes	chr1	15433204	15437124	+	556	3920	3	0,1425,3764	266,134,156	15433204,15434629,15436968	15433470,15434763,15437124	PREDICTED.550.2	chr1:15429493-15433204|chr1:15437124-15438887	1	0	0	0	0	0	0	0	0	0	0	0	0	0	0	0	0	1	0	0	0	0	0	0	0	1.04496	0	0	0	0	0	0	0.705287
mmu_circ_000778	chr1_15433204_15439098_F	circRNA	Yes	chr1	15433204	15439098	+	767	5894	4	0,1425,3764,5683	266,134,156,211	15433204,15434629,15436968,15438887	15433470,15434763,15437124,15439098	ENSMMUT00000030197	chr1:15429493-15433204|chr1:15439098-15439999	0	0	0	1	0	0	0	0	0	0	0	0	0	0	0	0	0	0	0	0	1	0	0	0	0	0	0	0	0	0	0	0	0
mmu_circ_000779	chr1_15433204_15440074_F	circRNA	Yes*	chr1	15433204	15440074	+	842	6870	5	0,1425,3764,5683,6795	266,134,156,211,75	15433204,15434629,15436968,15438887,15439999	15433470,15434763,15437124,15439098,15440074	PREDICTED.550.1	chr1:15429493-15433204|chr1:15440074-15444557	0	0	0	0	0	0	0	0	0	0	0	0	0	0	0	0	0	0	0	0	0	0	0	1	0	0	0	0	0	0	0	0.401374	0
mmu_circ_000780	chr1_15433204_15444764_F	circRNA	Yes*	chr1	15433204	15444764	+	1049	11560	6	0,1425,3764,5683,6795,11353	266,134,156,211,75,207	15433204,15434629,15436968,15438887,15439999,15444557	15433470,15434763,15437124,15439098,15440074,15444764	PREDICTED.384.2	chr1:15429493-15433204|chr1:15444764-15446719	0	0	0	0	0	0	0	0	0	0	0	0	0	0	0	0	0	1	0	0	0	0	0	0	0	0	0	0	0	0	0	0	0.705287
mmu_circ_000785	chr1_154809100_154812995_R	circRNA	Yes	chr1	154809100	154812995	-	253	3895	2	0,3739	97,156	154809100,154812839	154809197,154812995	ENSMMUT00000031856	chr1:154802818-154809100|chr1:154812995-154816650	0	0	0	0	0	0	0	2	0	0	0	0	0	0	0	0	0	0	0	0	0	0	0	0	0	0	0	0	0	0	0	0	0
mmu_circ_000786	chr1_154818726_154844304_R	circRNA	Yes	chr1	154818726	154844304	-	603	25578	5	0,247,6844,18435,25487	117,88,116,191,91	154818726,154818973,154825570,154837161,154844213	154818843,154819061,154825686,154837352,154844304	ENSMMUT00000031857	chr1:154816821-154818726|chr1:154844304-154844762	0	0	0	0	0	0	0	0	1	0	0	0	0	0	1	0	0	0	0	0	0	0	0	0	0	0	0	0	0	0	0	0	0
mmu_circ_000787	chr1_154818726_154844900_R	circRNA	Yes	chr1	154818726	154844900	-	741	26174	6	0,247,6844,18435,25487,26036	117,88,116,191,91,138	154818726,154818973,154825570,154837161,154844213,154844762	154818843,154819061,154825686,154837352,154844304,154844900	ENSMMUT00000031856	chr1:154816821-154818726|chr1:154844900-154845816	0	0	1	0	0	0	1	0	0	0	0	0	1	1	0	0	0	0	0	0	1	0	0	0	0	0	0.990325	0.688568	0	0.993085	0	0	0
mmu_circ_000791	chr1_15571783_15576139_F	circRNA	Yes*	chr1	15571783	15576139	+	329	4356	2	0,4160	133,196	15571783,15575943	15571916,15576139	PREDICTED.471.1	chr1:15533779-15571783|chr1:15576139-15612944	0	0	0	0	0	0	0	0	0	0	0	0	0	0	0	0	1	0	0	0	0	0	0	0	0	0	0	0	0	0	0	0	0
mmu_circ_000793	chr1_156041566_156055161_F	circRNA	Yes	chr1	156041566	156055161	+	325	13595	4	0,2947,12353,13507	98,68,71,88	156041566,156044513,156053919,156055073	156041664,156044581,156053990,156055161	PREDICTED.5701.2	chr1:156003833-156041566|chr1:156055161-156059706	0	0	0	0	0	0	0	0	0	0	0	0	0	0	0	0	0	2	0	0	0	0	0	0	0	0	0	0	0	0	0	0	1.41057
mmu_circ_000794	chr1_156055073_156062780_F	circRNA	Yes	chr1	156055073	156062780	+	265	7707	3	0,4633,7619	88,89,88	156055073,156059706,156062692	156055161,156059795,156062780	PREDICTED.5701.2	chr1:156053990-156055073|chr1:156062780-156063944	0	0	0	0	0	0	1	0	0	0	1	0	0	0	0	0	0	0	0	0	0	0	0	0	0	0	0.990325	0	0	0	0	0	0
mmu_circ_000795	chr1_156118632_156137797_R	circRNA	Yes	chr1	156118632	156137797	-	984	19165	9	0,2179,3286,4079,6654,9639,15377,16220,19054	109,175,121,111,103,68,125,61,111	156118632,156120811,156121918,156122711,156125286,156128271,156134009,156134852,156137686	156118741,156120986,156122039,156122822,156125389,156128339,156134134,156134913,156137797	ENSMMUT00000021931	chr1:156116615-156118632|chr1:156137797-156171594	0	0	0	0	0	0	0	0	0	0	0	0	0	0	0	0	0	2	0	0	0	0	0	0	0	0	0	0	0	0	0	0	1.41057
mmu_circ_000799	chr1_15698080_15698773_R	circRNA	Yes	chr1	15698080	15698773	-	359	693	2	0,573	239,120	15698080,15698653	15698319,15698773	ENSMMUT00000007984	chr1:15692088-15698080|chr1:15698773-15699927	2	0	0	0	0	0	0	0	0	0	0	0	0	0	0	1	1	2	0	0	2	0	0	0	0	2.08991	0	0	0	0	0	0	1.41057
mmu_circ_000800	chr1_15698080_15700071_R	circRNA	Yes	chr1	15698080	15700071	-	503	1991	3	0,573,1847	239,120,144	15698080,15698653,15699927	15698319,15698773,15700071	ENSMMUT00000007984	chr1:15692088-15698080|chr1:15700071-15741098	0	0	0	0	0	0	1	0	0	0	0	0	1	0	1	0	0	0	0	0	1	0	0	0	0	0	0.990325	0.688568	0	0	0	0	0
mmu_circ_000801	chr1_157224767_157226514_R	circRNA	Yes	chr1	157224767	157226514	-	181	1747	2	0,1699	133,48	157224767,157226466	157224900,157226514	ENSMMUT00000007336	chr1:157215572-157224767|chr1:157226514-157274701	0	0	0	0	0	0	0	0	2	0	0	0	0	0	0	0	0	0	0	0	0	0	0	0	0	0	0	0	0	0	0	0	0
mmu_circ_000803	chr1_157226466_157342416_R	circRNA	Yes*	chr1	157226466	157342416	-	830	115950	6	0,48235,56767,92732,105490,115834	48,93,116,363,94,116	157226466,157274701,157283233,157319198,157331956,157342300	157226514,157274794,157283349,157319561,157332050,157342416	PREDICTED.3893.1	chr1:157224900-157226466|chr1:157342416-157369703	0	0	0	0	0	0	0	0	0	0	0	0	0	0	0	0	0	0	0	0	1	0	0	0	0	0	0	0	0	0	0	0	0
mmu_circ_000804	chr1_157274701_157283349_R	circRNA	Yes	chr1	157274701	157283349	-	209	8648	2	0,8532	93,116	157274701,157283233	157274794,157283349	ENSMMUT00000007336	chr1:157226514-157274701|chr1:157283349-157319198	0	0	0	0	0	0	0	0	0	0	1	0	0	0	0	0	2	0	1	0	0	0	0	0	0.613597	0	0	0	0	0	0	0	0
mmu_circ_000805	chr1_157274701_157332050_R	circRNA	Yes*	chr1	157274701	157332050	-	666	57349	4	0,8532,44497,57255	93,116,363,94	157274701,157283233,157319198,157331956	157274794,157283349,157319561,157332050	ENSMMUT00000045263	chr1:157226514-157274701|chr1:157332050-157342300	1	0	0	0	0	0	0	0	0	0	0	0	0	0	0	0	0	0	0	0	0	0	0	0	0	1.04496	0	0	0	0	0	0	0
mmu_circ_000806	chr1_157274701_157342416_R	circRNA	Yes	chr1	157274701	157342416	-	782	67715	5	0,8532,44497,57255,67599	93,116,363,94,116	157274701,157283233,157319198,157331956,157342300	157274794,157283349,157319561,157332050,157342416	ENSMMUT00000045263	chr1:157226514-157274701|chr1:157342416-157369703	1	0	0	2	0	0	3	0	0	1	0	0	1	2	0	0	4	0	1	0	0	0	0	0	0.613597	1.04496	2.97097	0.688568	0	0	0	0	0
mmu_circ_000807	chr1_157283233_157332050_R	circRNA	Yes	chr1	157283233	157332050	-	573	48817	3	0,35965,48723	116,363,94	157283233,157319198,157331956	157283349,157319561,157332050	ENSMMUT00000007336	chr1:157274794-157283233|chr1:157332050-157342300	0	1	0	0	0	0	1	0	0	0	0	0	0	0	0	0	0	0	0	0	0	0	0	0	0	0	0.990325	0	1.55173	0	0	0	0
mmu_circ_000808	chr1_157283233_157342416_R	circRNA	Yes	chr1	157283233	157342416	-	689	59183	4	0,35965,48723,59067	116,363,94,116	157283233,157319198,157331956,157342300	157283349,157319561,157332050,157342416	ENSMMUT00000045263	chr1:157274794-157283233|chr1:157342416-157369703	1	1	0	1	0	0	3	0	0	0	0	1	2	0	0	2	0	0	0	0	2	0	0	0	0	1.04496	2.97097	1.37714	1.55173	0	0	0	0
mmu_circ_000809	chr1_157319198_157332050_R	circRNA	Yes	chr1	157319198	157332050	-	457	12852	2	0,12758	363,94	157319198,157331956	157319561,157332050	ENSMMUT00000007336	chr1:157283349-157319198|chr1:157332050-157342300	0	0	0	0	0	0	0	0	0	0	0	0	2	1	0	0	0	1	0	0	0	0	0	0	0	0	0	1.37714	0	0	0	0	0.705287
mmu_circ_000810	chr1_157319198_157342416_R	circRNA	Yes	chr1	157319198	157342416	-	573	23218	3	0,12758,23102	363,94,116	157319198,157331956,157342300	157319561,157332050,157342416	ENSMMUT00000045263	chr1:157283349-157319198|chr1:157342416-157369703	5	1	1	1	1	0	4	1	1	0	0	0	1	2	1	5	2	0	1	0	0	0	0	0	0.613597	5.22478	3.9613	0.688568	1.55173	0.993085	0	0	0
mmu_circ_000811	chr1_157319198_157369824_R	circRNA	Yes	chr1	157319198	157369824	-	694	50626	4	0,12758,23102,50505	363,94,116,121	157319198,157331956,157342300,157369703	157319561,157332050,157342416,157369824	ENSMMUT00000045263	chr1:157283349-157319198|chr1:157369824-157395588	1	0	0	0	0	0	0	1	0	0	0	0	0	0	0	0	0	0	0	0	0	0	0	0	0	1.04496	0	0	0	0	0	0	0
mmu_circ_000812	chr1_157331956_157342416_R	circRNA	Yes	chr1	157331956	157342416	-	210	10460	2	0,10344	94,116	157331956,157342300	157332050,157342416	ENSMMUT00000045263	chr1:157319561-157331956|chr1:157342416-157369703	0	0	0	0	0	0	0	1	1	0	0	0	0	0	0	1	0	0	0	0	0	0	1	0	0	0	0	0	0	0	0	0	0
mmu_circ_000813	chr1_157331956_157369824_R	circRNA	Yes	chr1	157331956	157369824	-	331	37868	3	0,10344,37747	94,116,121	157331956,157342300,157369703	157332050,157342416,157369824	ENSMMUT00000045263	chr1:157319561-157331956|chr1:157369824-157395588	1	1	0	0	0	0	1	0	0	0	0	0	0	0	0	0	0	0	1	0	0	0	0	0	0.613597	1.04496	0.990325	0	1.55173	0	0	0	0
mmu_circ_000816	chr1_157549652_157561024_R	circRNA	Yes	chr1	157549652	157561024	-	642	11372	6	0,663,1263,3529,5526,11231	112,106,111,104,68,141	157549652,157550315,157550915,157553181,157555178,157560883	157549764,157550421,157551026,157553285,157555246,157561024	ENSMMUT00000016429	chr1:157543529-157549652|chr1:157561024-157570051	0	0	0	0	1	0	0	0	1	0	0	0	0	0	0	0	0	0	0	0	0	0	0	0	0	0	0	0	0	0	0	0	0
mmu_circ_000817	chr1_157560883_157561024_R	circRNA	Yes	chr1	157560883	157561024	-	141	141	1	0	141	157560883	157561024	ENSMMUT00000016429	chr1:157555246-157560883|chr1:157561024-157570051	0	0	0	0	0	0	0	0	1	0	0	0	0	0	0	0	0	0	0	0	0	0	2	0	0	0	0	0	0	0	0	0	0
mmu_circ_000818	chr1_157560883_157570196_R	circRNA	Yes*	chr1	157560883	157570196	-	286	9313	2	0,9168	141,145	157560883,157570051	157561024,157570196	ENSMMUT00000016429	chr1:157555246-157560883|chr1:157570196-157575051	0	0	0	0	0	0	0	0	0	1	0	0	0	0	0	0	0	0	0	0	0	0	0	0	0	0	0	0	0	0	0	0	0
mmu_circ_000819	chr1_157643802_157646250_F	circRNA	Yes*	chr1	157643802	157646250	+	186	2448	2	0,2393	131,55	157643802,157646195	157643933,157646250	ENSMMUT00000027089	chr1:157640197-157643802|chr1:157646250-157676692	0	0	0	0	0	0	0	0	0	0	0	0	0	0	1	0	0	0	0	0	0	0	0	0	0	0	0	0	0	0	0	0	0
mmu_circ_000820	chr1_158047078_158047733_R	circRNA	Yes	chr1	158047078	158047733	-	299	655	3	0,215,604	128,120,51	158047078,158047293,158047682	158047206,158047413,158047733	ENSMMUT00000027790	chr1:158045946-158047078|chr1:158047733-158055543	3	0	0	0	0	0	0	0	0	0	0	0	0	0	0	0	0	0	0	0	0	0	0	0	0	3.13487	0	0	0	0	0	0	0
mmu_circ_000824	chr1_158057707_158078584_R	circRNA	Yes	chr1	158057707	158078584	-	583	20877	5	0,1366,5390,16071,20680	60,131,93,102,197	158057707,158059073,158063097,158073778,158078387	158057767,158059204,158063190,158073880,158078584	ENSMMUT00000027790	chr1:158056403-158057707|chr1:158078584-158118086	0	0	0	0	2	0	0	0	0	0	0	0	0	0	0	0	0	0	0	0	0	0	0	0	0	0	0	0	0	0	0	0	0
mmu_circ_000826	chr1_158073778_158078584_R	circRNA	Yes	chr1	158073778	158078584	-	299	4806	2	0,4609	102,197	158073778,158078387	158073880,158078584	ENSMMUT00000027790	chr1:158063190-158073778|chr1:158078584-158118086	3	0	2	1	0	0	1	0	0	0	0	0	0	0	2	0	2	0	1	0	0	0	0	0	0.613597	3.13487	0.990325	0	0	1.98617	0	0	0
mmu_circ_000827	chr1_158389268_158402571_F	circRNA	Yes*	chr1	158389268	158402571	+	785	13303	6	0,948,4188,8551,12492,13180	130,147,138,47,200,123	158389268,158390216,158393456,158397819,158401760,158402448	158389398,158390363,158393594,158397866,158401960,158402571	PREDICTED.3095.2	chr1:158375456-158389268|chr1:158402571-158419543	0	0	0	0	0	0	0	0	0	0	0	0	0	0	1	0	0	0	0	0	0	0	0	0	0	0	0	0	0	0	0	0	0
mmu_circ_000832	chr1_158616609_158622790_F	circRNA	Yes	chr1	158616609	158622790	+	215	6181	2	0,6085	119,96	158616609,158622694	158616728,158622790	ENSMMUT00000028931	chr1:158575213-158616609|chr1:158622790-158626592	1	0	0	1	0	0	2	0	0	0	0	0	0	0	0	0	0	0	0	0	0	0	0	0	0	1.04496	1.98065	0	0	0	0	0	0
mmu_circ_000833	chr1_158616609_158631124_F	circRNA	Yes	chr1	158616609	158631124	+	616	14515	4	0,6085,9983,14388	119,96,274,127	158616609,158622694,158626592,158630997	158616728,158622790,158626866,158631124	ENSMMUT00000028931	chr1:158575213-158616609|chr1:158631124-158661538	0	0	0	0	0	0	0	0	0	0	0	0	0	0	1	0	0	1	0	0	0	0	0	0	0	0	0	0	0	0	0	0	0.705287
mmu_circ_000837	chr1_159115728_159136484_R	circRNA	Yes	chr1	159115728	159136484	-	501	20756	4	0,6029,19554,20631	78,219,79,125	159115728,159121757,159135282,159136359	159115806,159121976,159135361,159136484	ENSMMUT00000028663	chr1:159106489-159115728|chr1:159136484-159138178	0	0	0	0	0	0	0	0	1	0	0	0	0	0	1	0	0	0	0	0	0	0	0	0	0	0	0	0	0	0	0	0	0
mmu_circ_000839	chr1_159473181_159473611_F	circRNA	Yes	chr1	159473181	159473611	+	430	430	1	0	430	159473181	159473611	ENSMMUT00000022646	chr1:159383819-159473181|chr1:159473611-159590924	0	0	0	0	0	0	0	0	0	0	0	0	0	0	0	0	1	0	0	0	0	0	1	0	0	0	0	0	0	0	0	0	0
mmu_circ_000841	chr1_162282050_162286144_F	circRNA	Yes	chr1	162282050	162286144	+	366	4094	3	0,758,3979	154,97,115	162282050,162282808,162286029	162282204,162282905,162286144	PREDICTED.4512.2	chr1:162280088-162282050|chr1:162286144-162294348	0	0	0	0	0	0	1	0	0	0	0	0	0	1	1	0	0	0	0	0	0	0	0	0	0	0	0.990325	0	0	0	0	0	0
mmu_circ_000843	chr1_162612645_162613340_R	circRNA	Yes	chr1	162612645	162613340	-	292	695	2	0,506	103,189	162612645,162613151	162612748,162613340	ENSMMUT00000009947	chr1:162610342-162612645|chr1:162613340-162618441	0	1	0	0	1	0	1	0	0	0	0	0	0	0	0	0	0	0	0	0	0	0	0	0	0	0	0.990325	0	1.55173	0	0	0	0
mmu_circ_000845	chr1_163292534_163295725_R	circRNA	Yes	chr1	163292534	163295725	-	547	3191	6	0,1322,1729,1938,2428,3065	125,57,75,67,97,126	163292534,163293856,163294263,163294472,163294962,163295599	163292659,163293913,163294338,163294539,163295059,163295725	ENSMMUT00000031182	chr1:163290205-163292534|chr1:163295725-163302960	0	0	0	0	0	0	0	0	0	1	0	0	1	0	0	0	0	0	1	0	0	0	0	0	0.613597	0	0	0.688568	0	0	0	0	0
mmu_circ_000847	chr1_16365511_16379453_F	circRNA	Yes	chr1	16365511	16379453	+	375	13942	3	0,1807,13789	118,104,153	16365511,16367318,16379300	16365629,16367422,16379453	PREDICTED.545.2	chr1:16353777-16365511|chr1:16379453-16387206	0	0	0	0	0	0	0	0	0	0	0	0	0	0	1	0	1	0	0	0	0	0	0	0	0	0	0	0	0	0	0	0	0
mmu_circ_000849	chr1_163764131_163767323_F	circRNA	Yes	chr1	163764131	163767323	+	486	3192	5	0,473,697,1213,3096	46,104,150,90,96	163764131,163764604,163764828,163765344,163767227	163764177,163764708,163764978,163765434,163767323	ENSMMUT00000003596	chr1:163762085-163764131|chr1:163767323-163768540	0	0	0	0	1	0	0	0	0	0	0	0	0	1	0	0	0	0	0	0	0	0	0	0	0	0	0	0	0	0	0	0	0
mmu_circ_000852	chr1_16407953_16411984_F	circRNA	Yes	chr1	16407953	16411984	+	167	4031	2	0,3920	56,111	16407953,16411873	16408009,16411984	PREDICTED.905.2	chr1:16387333-16407953|chr1:16411984-16417045	0	0	0	0	4	0	0	0	0	0	0	0	0	0	0	0	0	0	0	0	0	0	0	0	0	0	0	0	0	0	0	0	0
mmu_circ_000854	chr1_16411873_16421432_F	circRNA	Yes	chr1	16411873	16421432	+	4498	9559	2	0,5172	111,4387	16411873,16417045	16411984,16421432	PREDICTED.1345.2	chr1:16387333-16411873|chr1:16421432-16455023	0	3	0	0	2	0	0	2	1	0	1	0	0	1	0	1	0	1	0	0	2	0	0	0	0	0	0	0	4.65518	0	0	0	0.705287
mmu_circ_000855	chr1_16417045_16421432_F	circRNA	Yes	chr1	16417045	16421432	+	4387	4387	1	0	4387	16417045	16421432	PREDICTED.1345.2	chr1:16411984-16417045|chr1:16421432-16455023	0	0	0	0	0	0	1	0	0	0	0	0	0	0	0	0	0	0	0	0	1	0	0	0	0	0	0.990325	0	0	0	0	0	0
mmu_circ_000857	chr1_164791171_164799006_F	circRNA	Yes	chr1	164791171	164799006	+	1376	7835	4	0,2624,4700,7665	216,873,117,170	164791171,164793795,164795871,164798836	164791387,164794668,164795988,164799006	PREDICTED.5820.2	chr1:164789269-164791171|chr1:164799006-164829141	0	0	0	0	0	0	0	0	0	0	7	0	0	0	0	0	0	0	0	0	0	0	0	0	0	0	0	0	0	0	0	0	0
mmu_circ_000858	chr1_164793795_164795988_F	circRNA	Yes	chr1	164793795	164795988	+	990	2193	2	0,2076	873,117	164793795,164795871	164794668,164795988	PREDICTED.2590.1	chr1:164791387-164793795|chr1:164795988-164798836	0	0	0	0	0	1	0	0	0	0	0	0	0	0	0	0	0	0	0	0	1	0	0	0	0	0	0	0	0	0	0	0	0
mmu_circ_000860	chr1_165255432_165258095_F	circRNA	Yes	chr1	165255432	165258095	+	624	2663	4	0,943,1736,2533	233,84,177,130	165255432,165256375,165257168,165257965	165255665,165256459,165257345,165258095	PREDICTED.2801.2	chr1:165250805-165255432|chr1:165258095-165258637	0	0	0	1	0	1	0	0	0	0	0	0	0	0	0	0	0	0	0	0	0	0	0	0	0	0	0	0	0	0	0	0	0
mmu_circ_000864	chr1_166002213_166004607_F	circRNA	Yes*	chr1	166002213	166004607	+	307	2394	3	0,1821,2287	118,82,107	166002213,166004034,166004500	166002331,166004116,166004607	PREDICTED.3843.4	chr1:166000130-166002213|chr1:166004607-166006518	0	0	0	0	0	0	0	0	0	0	0	0	0	0	0	0	0	0	0	0	1	0	0	0	0	0	0	0	0	0	0	0	0
mmu_circ_000867	chr1_166317332_166319021_R	circRNA	Yes*	chr1	166317332	166319021	-	416	1689	3	0,176,1472	87,112,217	166317332,166317508,166318804	166317419,166317620,166319021	PREDICTED.7168.1	chr1:166315425-166317332|chr1:166319021-166358559	1	0	0	0	0	0	0	0	0	0	0	0	0	0	0	0	0	0	0	0	0	0	0	0	0	1.04496	0	0	0	0	0	0	0
mmu_circ_000869	chr1_166583982_166586984_R	circRNA	Yes	chr1	166583982	166586984	-	168	3002	2	0,2903	69,99	166583982,166586885	166584051,166586984	PREDICTED.4747.3	chr1:166578921-166583982|chr1:166586984-166591353	1	0	0	0	0	0	2	0	0	0	0	0	0	0	0	0	1	0	0	1	0	0	0	0	0	1.04496	1.98065	0	0	0	0	0	0
mmu_circ_000870	chr1_166583982_166591416_R	circRNA	Yes	chr1	166583982	166591416	-	231	7434	3	0,2903,7371	69,99,63	166583982,166586885,166591353	166584051,166586984,166591416	PREDICTED.4747.3	chr1:166578921-166583982|chr1:166591416-166593733	0	0	0	0	0	0	2	2	0	0	0	0	0	1	0	0	0	1	0	0	0	0	0	0	0	0	1.98065	0	0	0	0	0	0.705287
mmu_circ_000871	chr1_166583982_166593844_R	circRNA	Yes	chr1	166583982	166593844	-	342	9862	4	0,2903,7371,9751	69,99,63,111	166583982,166586885,166591353,166593733	166584051,166586984,166591416,166593844	PREDICTED.4451.1	chr1:166578921-166583982|chr1:166593844-166595257	1	0	0	0	0	0	0	0	0	0	0	0	0	0	0	0	0	0	0	0	2	0	0	0	0	1.04496	0	0	0	0	0	0	0
mmu_circ_000874	chr1_166607483_166609241_R	circRNA	Yes	chr1	166607483	166609241	-	318	1758	2	0,1560	120,198	166607483,166609043	166607603,166609241	PREDICTED.4747.1	chr1:166597146-166607483|chr1:166609241-166622998	0	0	0	0	0	0	2	5	2	0	0	1	0	0	0	3	0	0	1	0	0	2	0	0	0.613597	0	1.98065	0	0	0	0.861132	0	0
mmu_circ_000877	chr1_166714640_166715730_R	circRNA	Yes*	chr1	166714640	166715730	-	458	1090	2	0,875	243,215	166714640,166715515	166714883,166715730	PREDICTED.4250.6	chr1:166713401-166714640|chr1:166715730-166718924	0	0	0	0	0	0	0	0	0	0	0	0	0	0	0	0	0	1	0	0	0	0	0	0	0	0	0	0	0	0	0	0	0.705287
mmu_circ_000883	chr1_167604112_167605637_F	circRNA	Yes	chr1	167604112	167605637	+	303	1525	2	0,1329	107,196	167604112,167605441	167604219,167605637	ENSMMUT00000025086	chr1:167590745-167604112|chr1:167605637-167606409	0	0	0	0	0	0	0	0	0	0	0	0	0	1	0	0	1	0	0	0	0	0	0	0	0	0	0	0	0	0	0	0	0
mmu_circ_000884	chr1_167727554_167730030_F	circRNA	Yes	chr1	167727554	167730030	+	201	2476	2	0,2353	78,123	167727554,167729907	167727632,167730030	ENSMMUT00000021355	chr1:167696343-167727554|chr1:167730030-167731517	0	0	0	0	0	0	0	0	0	0	0	0	0	0	1	0	0	0	1	0	0	0	0	0	0.613597	0	0	0	0	0	0	0	0
mmu_circ_000891	chr1_168006071_168014699_R	circRNA	Yes	chr1	168006071	168014699	-	640	8628	5	0,1442,1638,3781,8537	42,113,190,204,91	168006071,168007513,168007709,168009852,168014608	168006113,168007626,168007899,168010056,168014699	PREDICTED.4423.2	chr1:168004377-168006071|chr1:168014699-168050868	0	0	0	0	0	0	0	0	0	0	0	2	0	0	0	0	0	2	0	0	0	0	0	0	0	0	0	0	0	0	0	0	1.41057
mmu_circ_000892	chr1_168006071_168051051_R	circRNA	Yes	chr1	168006071	168051051	-	823	44980	6	0,1442,1638,3781,8537,44797	42,113,190,204,91,183	168006071,168007513,168007709,168009852,168014608,168050868	168006113,168007626,168007899,168010056,168014699,168051051	ENSMMUT00000005666	chr1:168004377-168006071|chr1:168051051-168057426	0	0	0	0	2	0	0	0	0	0	0	0	0	0	2	1	0	0	0	0	0	0	0	0	0	0	0	0	0	0	0	0	0
mmu_circ_000893	chr1_168014608_168051051_R	circRNA	Yes	chr1	168014608	168051051	-	274	36443	2	0,36260	91,183	168014608,168050868	168014699,168051051	ENSMMUT00000005666	chr1:168010056-168014608|chr1:168051051-168057426	0	0	0	1	0	0	0	1	1	0	0	0	0	0	1	0	0	0	0	0	0	0	0	0	0	0	0	0	0	0	0	0	0
mmu_circ_000894	chr1_168050868_168051051_R	circRNA	Yes	chr1	168050868	168051051	-	183	183	1	0	183	168050868	168051051	PREDICTED.4423.2	chr1:168014699-168050868|chr1:168051051-168057426	0	0	0	0	0	0	0	1	0	0	0	0	0	1	0	0	0	0	0	0	0	0	0	0	0	0	0	0	0	0	0	0	0
mmu_circ_000896	chr1_168050868_168083604_R	circRNA	Yes	chr1	168050868	168083604	-	1559	32736	12	0,6558,8319,11108,14521,17649,18463,20650,22415,23809,26826,32605	183,126,83,204,113,140,80,75,145,160,119,131	168050868,168057426,168059187,168061976,168065389,168068517,168069331,168071518,168073283,168074677,168077694,168083473	168051051,168057552,168059270,168062180,168065502,168068657,168069411,168071593,168073428,168074837,168077813,168083604	ENSMMUT00000005666	chr1:168014699-168050868|chr1:168083604-168151133	0	0	0	0	0	0	1	0	0	0	0	1	0	0	0	1	0	0	0	0	0	0	0	0	0	0	0.990325	0	0	0	0	0	0
mmu_circ_000898	chr1_168482081_168482306_R	circRNA	Yes	chr1	168482081	168482306	-	225	225	1	0	225	168482081	168482306	ENSMMUT00000045056	chr1:168480908-168482081|chr1:168482306-168484778	1	0	0	0	0	0	0	0	1	0	0	0	0	0	0	0	0	0	0	0	0	0	0	0	0	1.04496	0	0	0	0	0	0	0
mmu_circ_000900	chr1_168486464_168490918_R	circRNA	Yes*	chr1	168486464	168490918	-	467	4454	3	0,3056,4337	114,236,117	168486464,168489520,168490801	168486578,168489756,168490918	ENSMMUT00000002725	chr1:168485170-168486464|chr1:168490918-168499239	0	0	0	0	0	0	0	0	0	0	0	0	0	0	0	0	0	0	1	0	0	0	0	0	0.613597	0	0	0	0	0	0	0	0
mmu_circ_000905	chr1_168633237_168633783_R	circRNA	Yes	chr1	168633237	168633783	-	247	546	2	0,439	140,107	168633237,168633676	168633377,168633783	ENSMMUT00000002714	chr1:168628655-168633237|chr1:168633783-168635336	0	0	0	0	0	0	0	0	0	0	0	0	0	2	1	0	0	1	1	0	0	0	0	0	0.613597	0	0	0	0	0	0	0	0.705287
mmu_circ_000906	chr1_168633237_168635435_R	circRNA	Yes	chr1	168633237	168635435	-	346	2198	3	0,439,2099	140,107,99	168633237,168633676,168635336	168633377,168633783,168635435	ENSMMUT00000002714	chr1:168628655-168633237|chr1:168635435-168638566	2	0	0	0	1	2	2	1	0	0	0	0	3	0	1	0	2	1	0	0	0	0	1	0	0	2.08991	1.98065	2.0657	0	0	0	0	0.705287
mmu_circ_000908	chr1_168646087_168647585_R	circRNA	Yes	chr1	168646087	168647585	-	351	1498	3	0,1135,1436	202,87,62	168646087,168647222,168647523	168646289,168647309,168647585	ENSMMUT00000002714	chr1:168642247-168646087|chr1:168647585-168666330	0	0	0	0	0	0	0	2	0	0	0	0	0	0	0	0	0	0	0	0	1	0	0	0	0	0	0	0	0	0	0	0	0
mmu_circ_000909	chr1_168678239_168678437_R	circRNA	Yes*	chr1	168678239	168678437	-	198	198	1	0	198	168678239	168678437	PREDICTED.2735.1	chr1:168676142-168678239|chr1:168678437-168681689	0	0	0	0	0	1	0	0	0	0	0	0	0	0	0	0	0	0	0	0	0	0	0	0	0	0	0	0	0	0	0	0	0
mmu_circ_000917	chr1_169453753_169453884_F	ciRNA	Yes	chr1	169453753	169453884	+	131	131	1	0	131	169453753	169453884	PREDICTED.4460.7	chr1:169453753-169453899	0	0	0	0	0	0	0	0	1	0	0	0	0	0	0	0	0	1	0	0	0	0	0	0	0	0	0	0	0	0	0	0	0.705287
mmu_circ_000918	chr1_169657357_169657998_R	circRNA	Yes*	chr1	169657357	169657998	-	282	641	2	0,499	140,142	169657357,169657856	169657497,169657998	ENSMMUT00000017110	chr1:169651463-169657357|chr1:169657998-169661559	0	0	0	0	0	0	0	0	0	0	0	0	0	0	1	0	0	0	0	0	0	0	0	0	0	0	0	0	0	0	0	0	0
mmu_circ_000920	chr1_169673810_169728565_R	circRNA	Yes	chr1	169673810	169728565	-	506	54755	3	0,8051,54495	84,162,260	169673810,169681861,169728305	169673894,169682023,169728565	ENSMMUT00000017110	chr1:169661592-169673810|chr1:169728565-169750199	2	0	0	1	0	1	0	0	0	0	0	2	0	0	0	1	3	0	1	0	0	0	0	0	0.613597	2.08991	0	0	0	0	0	0	0
mmu_circ_000921	chr1_169728305_169728565_R	circRNA	Yes	chr1	169728305	169728565	-	260	260	1	0	260	169728305	169728565	ENSMMUT00000017110	chr1:169682023-169728305|chr1:169728565-169750199	1	1	0	0	2	0	0	0	4	0	1	1	5	6	0	1	3	0	0	1	0	0	0	0	0	1.04496	0	3.44284	1.55173	0	0	0	0
mmu_circ_000930	chr1_172804497_172858824_F	circRNA	Yes	chr1	172804497	172858824	+	214	54327	3	0,52181,54207	44,50,120	172804497,172856678,172858704	172804541,172856728,172858824	ENSMMUT00000044993	chr1:172745096-172804497|chr1:172858824-172872415	0	0	0	0	0	0	0	0	0	0	0	0	0	0	0	0	1	0	0	0	1	0	0	0	0	0	0	0	0	0	0	0	0
mmu_circ_000931	chr1_172804497_172878216_F	circRNA	Yes	chr1	172804497	172878216	+	365	73719	5	0,52181,54207,67918,73638	44,50,120,70,81	172804497,172856678,172858704,172872415,172878135	172804541,172856728,172858824,172872485,172878216	ENSMMUT00000019594	chr1:172745096-172804497|chr1:172878216-172884708	2	0	0	0	0	0	0	0	0	0	0	0	0	0	0	0	0	0	0	0	0	0	0	0	0	2.08991	0	0	0	0	0	0	0
mmu_circ_000932	chr1_172804497_172887715_F	circRNA	Yes	chr1	172804497	172887715	+	590	83218	8	0,52181,54207,67918,73638,78841,80211,83107	44,50,120,70,81,60,54,111	172804497,172856678,172858704,172872415,172878135,172883338,172884708,172887604	172804541,172856728,172858824,172872485,172878216,172883398,172884762,172887715	ENSMMUT00000008905	chr1:172745096-172804497|chr1:172887715-172910913	0	0	0	0	0	0	2	0	0	0	0	0	0	0	0	0	0	0	0	0	0	0	0	0	0	0	1.98065	0	0	0	0	0	0
mmu_circ_000933	chr1_172872415_172878216_F	circRNA	Yes	chr1	172872415	172878216	+	151	5801	2	0,5720	70,81	172872415,172878135	172872485,172878216	ENSMMUT00000019594	chr1:172858824-172872415|chr1:172878216-172884708	0	0	1	0	0	0	0	0	0	0	0	0	0	0	0	0	0	1	0	0	0	0	0	0	0	0	0	0	0	0.993085	0	0	0.705287
mmu_circ_000934	chr1_172872415_172887715_F	circRNA	Yes	chr1	172872415	172887715	+	316	15300	4	0,5720,12293,15189	70,81,54,111	172872415,172878135,172884708,172887604	172872485,172878216,172884762,172887715	ENSMMUT00000019594	chr1:172858824-172872415|chr1:172887715-172910913	6	0	4	5	0	2	0	0	5	0	0	1	0	0	0	0	0	0	0	0	5	0	0	0	0	6.26973	0	0	0	3.97234	0	0	0
mmu_circ_000935	chr1_172872415_172887715_F	circRNA	Yes	chr1	172872415	172887715	+	376	15300	5	0,5720,10923,12293,15189	70,81,60,54,111	172872415,172878135,172883338,172884708,172887604	172872485,172878216,172883398,172884762,172887715	ENSMMUT00000008905	chr1:172858824-172872415|chr1:172887715-172910913	0	0	0	0	8	0	14	4	0	2	0	0	2	0	12	2	4	7	0	0	0	0	0	1	0	0	13.8645	1.37714	0	0	0	0.401374	4.93701
mmu_circ_000936	chr1_172872415_172921383_F	circRNA	Yes	chr1	172872415	172921383	+	565	48968	7	0,5720,12293,15189,38498,44229,48866	70,81,54,111,101,46,102	172872415,172878135,172884708,172887604,172910913,172916644,172921281	172872485,172878216,172884762,172887715,172911014,172916690,172921383	ENSMMUT00000019594	chr1:172858824-172872415|chr1:172921383-172933148	1	0	0	1	0	0	0	0	0	0	0	0	0	0	0	0	0	2	0	0	0	0	0	0	0	1.04496	0	0	0	0	0	0	1.41057
mmu_circ_000937	chr1_172872415_172921383_F	circRNA	Yes	chr1	172872415	172921383	+	625	48968	8	0,5720,10923,12293,15189,38498,44229,48866	70,81,60,54,111,101,46,102	172872415,172878135,172883338,172884708,172887604,172910913,172916644,172921281	172872485,172878216,172883398,172884762,172887715,172911014,172916690,172921383	ENSMMUT00000008905	chr1:172858824-172872415|chr1:172921383-172933148	0	0	0	0	0	0	4	1	1	0	0	0	0	0	0	0	0	0	0	0	0	0	0	1	0	0	3.9613	0	0	0	0	0.401374	0
mmu_circ_000938	chr1_172872415_172933274_F	circRNA	Yes	chr1	172872415	172933274	+	691	60859	8	0,5720,12293,15189,38498,44229,48866,60733	70,81,54,111,101,46,102,126	172872415,172878135,172884708,172887604,172910913,172916644,172921281,172933148	172872485,172878216,172884762,172887715,172911014,172916690,172921383,172933274	ENSMMUT00000019594	chr1:172858824-172872415|chr1:172933274-172950421	2	0	0	0	0	0	0	0	0	0	0	0	0	0	0	0	0	0	0	0	0	0	0	0	0	2.08991	0	0	0	0	0	0	0
mmu_circ_000940	chr1_172872415_172950523_F	circRNA	Yes	chr1	172872415	172950523	+	853	78108	10	0,5720,10923,12293,15189,38498,44229,48866,60733,78006	70,81,60,54,111,101,46,102,126,102	172872415,172878135,172883338,172884708,172887604,172910913,172916644,172921281,172933148,172950421	172872485,172878216,172883398,172884762,172887715,172911014,172916690,172921383,172933274,172950523	ENSMMUT00000008905	chr1:172858824-172872415|None	0	0	0	0	0	0	0	0	0	0	0	0	3	0	0	0	0	0	0	0	0	0	0	0	0	0	0	2.0657	0	0	0	0	0
mmu_circ_000942	chr1_172910913_172950523_F	circRNA	Yes	chr1	172910913	172950523	+	477	39610	5	0,5731,10368,22235,39508	101,46,102,126,102	172910913,172916644,172921281,172933148,172950421	172911014,172916690,172921383,172933274,172950523	ENSMMUT00000008905	chr1:172887715-172910913|None	0	0	0	0	0	0	0	1	1	0	0	0	0	0	0	0	1	0	0	0	0	1	0	0	0	0	0	0	0	0	0.430566	0	0
mmu_circ_000944	chr1_173789554_173807452_R	circRNA	Yes*	chr1	173789554	173807452	-	1071	17898	6	0,1577,1865,3215,15621,17715	171,180,183,177,177,183	173789554,173791131,173791419,173792769,173805175,173807269	173789725,173791311,173791602,173792946,173805352,173807452	PREDICTED.2766.2	chr1:173775244-173789554|chr1:173807452-173841477	0	0	0	0	0	0	0	0	1	0	0	0	0	0	0	0	0	0	0	0	0	0	0	0	0	0	0	0	0	0	0	0	0
mmu_circ_000946	chr1_177355990_177358508_R	circRNA	Yes	chr1	177355990	177358508	-	263	2518	2	0,2356	101,162	177355990,177358346	177356091,177358508	PREDICTED.4522.1	chr1:177342450-177355990|chr1:177358508-177381672	13	1	6	13	8	5	7	22	8	3	3	10	11	0	13	3	9	12	6	2	6	4	0	2	3.68158	13.5844	6.93227	7.57424	1.55173	5.95851	1.72226	0.802748	8.46345
mmu_circ_000951	chr1_177567494_177569090_F	circRNA	Yes	chr1	177567494	177569090	+	383	1596	4	0,208,348,1532	126,62,131,64	177567494,177567702,177567842,177569026	177567620,177567764,177567973,177569090	ENSMMUT00000031862	chr1:177546994-177567494|chr1:177569090-177579219	0	0	0	0	0	0	0	1	0	0	0	0	2	0	0	1	1	0	0	0	2	0	0	0	0	0	0	1.37714	0	0	0	0	0
mmu_circ_000952	chr1_177567842_177567973_F	circRNA	Yes	chr1	177567842	177567973	+	131	131	1	0	131	177567842	177567973	PREDICTED.4838.1	chr1:177567764-177567842|chr1:177567973-177569026	1	0	0	0	0	0	0	0	0	0	0	0	0	0	0	0	0	0	1	0	0	0	0	0	0.613597	1.04496	0	0	0	0	0	0	0
mmu_circ_000957	chr1_18408861_18421499_F	circRNA	Yes	chr1	18408861	18421499	+	622	12638	4	0,4277,7369,12510	130,237,127,128	18408861,18413138,18416230,18421371	18408991,18413375,18416357,18421499	PREDICTED.390.2	chr1:18399943-18408861|chr1:18421499-18426535	1	0	0	1	0	1	0	0	0	0	0	0	0	0	1	0	0	2	0	0	0	0	0	0	0	1.04496	0	0	0	0	0	0	1.41057
mmu_circ_000959	chr1_18408861_18426664_F	circRNA	Yes	chr1	18408861	18426664	+	751	17803	5	0,4277,7369,12510,17674	130,237,127,128,129	18408861,18413138,18416230,18421371,18426535	18408991,18413375,18416357,18421499,18426664	PREDICTED.390.2	chr1:18399943-18408861|chr1:18426664-18432781	0	0	1	2	0	0	0	0	0	0	2	1	4	1	0	0	3	0	1	0	0	0	0	0	0.613597	0	0	2.75427	0	0.993085	0	0	0
mmu_circ_000962	chr1_18413138_18426664_F	circRNA	Yes	chr1	18413138	18426664	+	534	13526	4	0,3092,8233,13397	150,127,128,129	18413138,18416230,18421371,18426535	18413288,18416357,18421499,18426664	PREDICTED.232.1	chr1:18408991-18413138|chr1:18426664-18432781	0	0	0	0	0	0	0	3	0	0	0	0	0	0	0	0	0	0	0	0	0	0	0	0	0	0	0	0	0	0	0	0	0
mmu_circ_000963	chr1_18413138_18426664_F	circRNA	Yes	chr1	18413138	18426664	+	621	13526	4	0,3092,8233,13397	237,127,128,129	18413138,18416230,18421371,18426535	18413375,18416357,18421499,18426664	PREDICTED.390.2	chr1:18408991-18413138|chr1:18426664-18432781	0	0	0	0	2	3	1	0	0	1	0	3	2	0	2	4	2	1	0	0	0	1	0	1	0	0	0.990325	1.37714	0	0	0.430566	0.401374	0.705287
mmu_circ_000964	chr1_18413138_18432885_F	circRNA	Yes	chr1	18413138	18432885	+	725	19747	5	0,3092,8233,13397,19643	237,127,128,129,104	18413138,18416230,18421371,18426535,18432781	18413375,18416357,18421499,18426664,18432885	PREDICTED.390.2	chr1:18408991-18413138|chr1:18432885-18434780	0	0	1	0	0	0	1	0	0	0	0	1	0	0	4	0	0	2	0	0	2	0	0	0	0	0	0.990325	0	0	0.993085	0	0	1.41057
mmu_circ_000967	chr1_18413138_18434970_F	circRNA	Yes	chr1	18413138	18434970	+	915	21832	6	0,3092,8233,13397,19643,21642	237,127,128,129,104,190	18413138,18416230,18421371,18426535,18432781,18434780	18413375,18416357,18421499,18426664,18432885,18434970	PREDICTED.390.2	chr1:18408991-18413138|chr1:18434970-18439196	0	0	0	0	1	1	0	0	0	0	0	1	0	1	1	0	0	0	1	0	0	0	0	0	0.613597	0	0	0	0	0	0	0	0
mmu_circ_000969	chr1_18416230_18421499_F	circRNA	Yes	chr1	18416230	18421499	+	255	5269	2	0,5141	127,128	18416230,18421371	18416357,18421499	PREDICTED.272.1	chr1:18413375-18416230|chr1:18421499-18426535	1	0	0	0	0	0	0	1	0	0	0	0	0	0	0	0	0	0	0	0	0	0	0	0	0	1.04496	0	0	0	0	0	0	0
mmu_circ_000970	chr1_18416230_18426664_F	circRNA	Yes	chr1	18416230	18426664	+	384	10434	3	0,5141,10305	127,128,129	18416230,18421371,18426535	18416357,18421499,18426664	PREDICTED.390.2	chr1:18413375-18416230|chr1:18426664-18432781	4	5	4	10	2	2	7	4	5	1	4	3	13	2	20	7	4	11	3	0	4	0	1	2	1.84079	4.17982	6.93227	8.95138	7.75863	3.97234	0	0.802748	7.75816
mmu_circ_000972	chr1_18416230_18432885_F	circRNA	Yes	chr1	18416230	18432885	+	488	16655	4	0,5141,10305,16551	127,128,129,104	18416230,18421371,18426535,18432781	18416357,18421499,18426664,18432885	PREDICTED.390.2	chr1:18413375-18416230|chr1:18432885-18434780	0	0	0	2	3	3	0	0	1	0	0	1	3	0	4	0	2	1	1	0	1	0	0	0	0.613597	0	0	2.0657	0	0	0	0	0.705287
mmu_circ_000973	chr1_18416230_18434970_F	circRNA	Yes	chr1	18416230	18434970	+	549	18740	4	0,5141,16551,18550	127,128,104,190	18416230,18421371,18432781,18434780	18416357,18421499,18432885,18434970	PREDICTED.744.2	chr1:18413375-18416230|chr1:18434970-18442645	0	0	0	0	0	0	0	0	0	0	0	0	0	0	0	3	0	0	0	0	0	0	0	0	0	0	0	0	0	0	0	0	0
mmu_circ_000974	chr1_18416230_18434970_F	circRNA	Yes	chr1	18416230	18434970	+	678	18740	5	0,5141,10305,16551,18550	127,128,129,104,190	18416230,18421371,18426535,18432781,18434780	18416357,18421499,18426664,18432885,18434970	PREDICTED.390.2	chr1:18413375-18416230|chr1:18434970-18439196	2	0	0	0	0	1	4	0	0	0	1	3	2	0	4	0	2	1	0	0	0	0	0	0	0	2.08991	3.9613	1.37714	0	0	0	0	0.705287
mmu_circ_000976	chr1_18421371_18426664_F	circRNA	Yes	chr1	18421371	18426664	+	257	5293	2	0,5164	128,129	18421371,18426535	18421499,18426664	PREDICTED.390.2	chr1:18416357-18421371|chr1:18426664-18432781	0	0	0	0	0	0	0	0	1	0	0	0	2	0	0	1	0	0	0	0	1	0	0	0	0	0	0	1.37714	0	0	0	0	0
mmu_circ_000977	chr1_18426535_18434970_F	circRNA	Yes	chr1	18426535	18434970	+	423	8435	3	0,6246,8245	129,104,190	18426535,18432781,18434780	18426664,18432885,18434970	PREDICTED.390.2	chr1:18421499-18426535|chr1:18434970-18439196	0	0	0	1	1	0	0	0	0	0	0	0	0	0	0	0	0	0	0	0	0	0	0	0	0	0	0	0	0	0	0	0	0
mmu_circ_000980	chr1_18432781_18434970_F	circRNA	Yes	chr1	18432781	18434970	+	294	2189	2	0,1999	104,190	18432781,18434780	18432885,18434970	PREDICTED.744.2	chr1:18421499-18432781|chr1:18434970-18442645	1	0	0	0	5	2	3	0	0	0	0	5	5	0	7	1	2	6	0	1	5	0	2	0	0	1.04496	2.97097	3.44284	0	0	0	0	4.23172
mmu_circ_000981	chr1_18432781_18434970_F	circRNA	Yes	chr1	18432781	18434970	+	248	2189	2	0,2045	104,144	18432781,18434826	18432885,18434970	PREDICTED.232.1	chr1:18426664-18432781|chr1:18434970-18442645	0	0	0	0	0	0	0	2	0	0	0	0	0	0	0	0	0	0	0	0	0	1	0	0	0	0	0	0	0	0	0.430566	0	0
mmu_circ_000986	chr1_184407674_184408056_F	circRNA	Yes	chr1	184407674	184408056	+	253	382	2	0,225	96,157	184407674,184407899	184407770,184408056	PREDICTED.4514.1	chr1:184406201-184407674|chr1:184408056-184409213	0	0	0	0	0	0	0	0	0	1	0	0	0	0	0	0	0	0	0	0	1	0	0	0	0	0	0	0	0	0	0	0	0
mmu_circ_000987	chr1_184647520_184652989_R	circRNA	Yes	chr1	184647520	184652989	-	369	5469	3	0,628,5301	87,114,168	184647520,184648148,184652821	184647607,184648262,184652989	PREDICTED.4693.1	chr1:184645012-184647520|chr1:184652989-184656221	0	0	0	0	0	0	0	0	0	0	0	0	0	2	1	0	0	2	0	0	0	0	0	0	0	0	0	0	0	0	0	0	1.41057
mmu_circ_000989	chr1_18502637_18503370_F	circRNA	Yes	chr1	18502637	18503370	+	188	733	2	0,645	100,88	18502637,18503282	18502737,18503370	ENSMMUT00000047548	chr1:18501561-18502637|chr1:18503370-18505047	1	0	0	0	1	0	3	3	0	0	0	0	2	5	2	1	0	1	0	0	0	0	0	0	0	1.04496	2.97097	1.37714	0	0	0	0	0.705287
mmu_circ_000990	chr1_18502637_18506693_F	circRNA	Yes	chr1	18502637	18506693	+	435	4056	4	0,645,2410,3996	100,88,187,60	18502637,18503282,18505047,18506633	18502737,18503370,18505234,18506693	ENSMMUT00000022871	chr1:18501561-18502637|chr1:18506693-18511137	0	0	0	0	0	0	1	1	0	0	0	0	0	0	0	0	0	0	0	0	0	0	0	0	0	0	0.990325	0	0	0	0	0	0
mmu_circ_000991	chr1_18505047_18506693_F	circRNA	Yes	chr1	18505047	18506693	+	247	1646	2	0,1586	187,60	18505047,18506633	18505234,18506693	ENSMMUT00000022871	chr1:18503370-18505047|chr1:18506693-18511137	2	0	0	0	0	0	3	0	0	0	0	0	0	0	2	0	0	0	0	0	0	0	0	0	0	2.08991	2.97097	0	0	0	0	0	0
mmu_circ_000992	chr1_185462297_185481187_R	circRNA	Yes	chr1	185462297	185481187	-	469	18890	3	0,11064,18741	132,188,149	185462297,185473361,185481038	185462429,185473549,185481187	ENSMMUT00000019484	chr1:185428839-185462297|chr1:185481187-185488477	2	2	0	0	0	0	7	4	0	1	1	0	5	0	3	1	3	0	0	0	4	2	0	0	0	2.08991	6.93227	3.44284	3.10345	0	0.861132	0	0
mmu_circ_000993	chr1_185462297_185492611_R	circRNA	Yes*	chr1	185462297	185492611	-	918	30314	6	0,11064,18741,26180,28100,30168	132,188,149,139,164,146	185462297,185473361,185481038,185488477,185490397,185492465	185462429,185473549,185481187,185488616,185490561,185492611	ENSMMUT00000019484	chr1:185428839-185462297|chr1:185492611-185500941	0	0	0	0	0	0	0	0	0	0	0	0	1	0	0	0	0	0	0	0	0	0	0	0	0	0	0	0.688568	0	0	0	0	0
mmu_circ_000994	chr1_185462297_185501035_R	circRNA	Yes	chr1	185462297	185501035	-	1012	38738	7	0,11064,18741,26180,28100,30168,38644	132,188,149,139,164,146,94	185462297,185473361,185481038,185488477,185490397,185492465,185500941	185462429,185473549,185481187,185488616,185490561,185492611,185501035	ENSMMUT00000019484	chr1:185428839-185462297|chr1:185501035-185507235	0	0	0	0	0	0	0	0	0	0	0	0	0	1	0	1	0	0	0	0	0	0	0	0	0	0	0	0	0	0	0	0	0
mmu_circ_000995	chr1_185462297_185511785_R	circRNA	Yes	chr1	185462297	185511785	-	1475	49488	11	0,11064,18741,26180,28100,30168,38644,44938,45530,47833,49428	132,188,149,139,164,146,94,189,102,112,60	185462297,185473361,185481038,185488477,185490397,185492465,185500941,185507235,185507827,185510130,185511725	185462429,185473549,185481187,185488616,185490561,185492611,185501035,185507424,185507929,185510242,185511785	PREDICTED.4516.1	chr1:185428839-185462297|chr1:185511785-185517286	0	0	0	0	0	0	0	0	2	0	0	0	0	0	0	0	0	0	0	0	0	0	0	0	0	0	0	0	0	0	0	0	0
mmu_circ_000996	chr1_185473361_185492611_R	circRNA	Yes	chr1	185473361	185492611	-	786	19250	5	0,7677,15116,17036,19104	188,149,139,164,146	185473361,185481038,185488477,185490397,185492465	185473549,185481187,185488616,185490561,185492611	ENSMMUT00000019484	chr1:185462429-185473361|chr1:185492611-185500941	0	0	0	1	0	0	3	1	0	0	1	0	2	0	2	0	0	2	0	0	1	0	0	0	0	0	2.97097	1.37714	0	0	0	0	1.41057
mmu_circ_001003	chr1_185517286_185518028_R	circRNA	Yes*	chr1	185517286	185518028	-	742	742	1	0	742	185517286	185518028	ENSMMUT00000019484	chr1:185511785-185517286|chr1:185518028-185524127	0	0	0	0	0	0	1	0	0	0	0	0	0	0	0	0	0	0	0	0	0	0	0	0	0	0	0.990325	0	0	0	0	0	0
mmu_circ_001008	chr1_185552725_185553574_F	circRNA	Yes	chr1	185552725	185553574	+	463	849	2	0,636	250,213	185552725,185553361	185552975,185553574	ENSMMUT00000019482	chr1:185549566-185552725|chr1:185553574-185555181	0	0	0	0	0	1	0	0	0	0	0	0	0	0	1	0	0	1	0	0	1	0	0	0	0	0	0	0	0	0	0	0	0.705287
mmu_circ_001009	chr1_185853142_185853718_F	circRNA	Yes*	chr1	185853142	185853718	+	268	576	2	0,413	105,163	185853142,185853555	185853247,185853718	PREDICTED.4542.2	chr1:185844998-185853142|chr1:185853718-185858399	1	0	0	0	0	0	0	0	0	0	0	0	0	0	0	0	0	0	0	0	0	0	0	0	0	1.04496	0	0	0	0	0	0	0
mmu_circ_001010	chr1_185924842_185943793_F	circRNA	Yes	chr1	185924842	185943793	+	454	18951	5	0,12064,12700,17154,18797	46,101,40,113,154	185924842,185936906,185937542,185941996,185943639	185924888,185937007,185937582,185942109,185943793	PREDICTED.4635.1	chr1:185919949-185924842|chr1:185943793-185950457	0	1	0	0	0	0	0	0	0	0	0	0	0	0	0	0	1	0	0	0	0	0	0	0	0	0	0	0	1.55173	0	0	0	0
mmu_circ_001014	chr1_185953301_185959254_F	circRNA	Yes	chr1	185953301	185959254	+	330	5953	3	0,4132,5827	106,98,126	185953301,185957433,185959128	185953407,185957531,185959254	PREDICTED.3060.2	chr1:185950592-185953301|chr1:185959254-185959451	0	0	0	1	0	0	0	0	0	0	0	0	0	1	0	0	0	0	0	0	0	0	0	0	0	0	0	0	0	0	0	0	0
mmu_circ_001015	chr1_185957433_185959254_F	circRNA	Yes*	chr1	185957433	185959254	+	224	1821	2	0,1695	98,126	185957433,185959128	185957531,185959254	PREDICTED.7805.1	chr1:185953407-185957433|chr1:185959254-185959451	0	0	0	0	1	0	0	0	0	0	0	0	0	0	0	0	0	0	0	0	0	0	0	0	0	0	0	0	0	0	0	0	0
mmu_circ_001016	chr1_185959451_185966243_F	circRNA	Yes	chr1	185959451	185966243	+	459	6792	4	0,1615,2237,6626	84,84,125,166	185959451,185961066,185961688,185966077	185959535,185961150,185961813,185966243	PREDICTED.3060.2	chr1:185959254-185959451|chr1:185966243-185966793	0	0	0	0	0	0	0	0	0	0	0	1	0	2	1	0	0	0	0	0	0	0	0	0	0	0	0	0	0	0	0	0	0
mmu_circ_001017	chr1_185966793_185972018_F	circRNA	Yes	chr1	185966793	185972018	+	667	5225	4	0,1329,3526,5059	155,154,192,166	185966793,185968122,185970319,185971852	185966948,185968276,185970511,185972018	ENSMMUT00000007610	chr1:185966243-185966793|chr1:185972018-185975706	2	0	0	2	2	0	0	0	0	0	0	0	0	0	1	0	0	0	0	0	0	0	0	0	0	2.08991	0	0	0	0	0	0	0
mmu_circ_001018	chr1_185966793_185975892_F	circRNA	Yes	chr1	185966793	185975892	+	853	9099	5	0,1329,3526,5059,8913	155,154,192,166,186	185966793,185968122,185970319,185971852,185975706	185966948,185968276,185970511,185972018,185975892	ENSMMUT00000007610	chr1:185966243-185966793|chr1:185975892-185984583	0	0	0	0	0	0	0	0	0	0	0	0	0	0	0	0	0	2	0	0	0	0	0	0	0	0	0	0	0	0	0	0	1.41057
mmu_circ_001019	chr1_186168532_186201261_R	circRNA	Yes	chr1	186168532	186201261	-	314	32729	2	0,32510	95,219	186168532,186201042	186168627,186201261	PREDICTED.4617.1	chr1:186082642-186168532|chr1:186201261-186276489	0	0	0	0	0	0	0	0	0	0	0	0	0	0	0	0	0	0	0	0	2	0	0	0	0	0	0	0	0	0	0	0	0
mmu_circ_001020	chr1_186741376_186745991_R	circRNA	Yes	chr1	186741376	186745991	-	442	4615	2	0,4428	255,187	186741376,186745804	186741631,186745991	PREDICTED.4212.2	chr1:186735873-186741376|chr1:186745991-186751163	0	0	0	0	0	0	0	0	0	2	0	0	0	0	0	0	0	0	0	0	0	0	0	0	0	0	0	0	0	0	0	0	0
mmu_circ_001022	chr1_18674942_18678793_F	circRNA	Yes	chr1	18674942	18678793	+	798	3851	2	0,3374	321,477	18674942,18678316	18675263,18678793	ENSMMUT00000011233	chr1:18643127-18674942|chr1:18678793-18710702	0	0	0	0	0	0	0	1	0	0	1	1	0	0	0	1	2	0	0	1	3	0	0	0	0	0	0	0	0	0	0	0	0
mmu_circ_001026	chr1_18710702_18712370_F	circRNA	Yes	chr1	18710702	18712370	+	362	1668	2	0,1467	161,201	18710702,18712169	18710863,18712370	ENSMMUT00000011233	chr1:18678793-18710702|chr1:18712370-18717412	0	0	0	0	0	1	0	0	0	0	0	0	0	0	1	0	3	1	0	0	0	0	0	0	0	0	0	0	0	0	0	0	0.705287
mmu_circ_001028	chr1_187138788_187143736_R	circRNA	Yes	chr1	187138788	187143736	-	283	4948	3	0,1845,4916	133,118,32	187138788,187140633,187143704	187138921,187140751,187143736	ENSMMUT00000025950	chr1:187129713-187138788|chr1:187143736-187182834	0	0	0	0	0	0	0	2	0	0	0	0	0	0	0	1	0	0	0	0	0	0	0	0	0	0	0	0	0	0	0	0	0
mmu_circ_001029	chr1_18717412_18724367_F	circRNA	Yes	chr1	18717412	18724367	+	607	6955	5	0,3427,3902,5370,6854	152,126,114,114,101	18717412,18720839,18721314,18722782,18724266	18717564,18720965,18721428,18722896,18724367	ENSMMUT00000011233	chr1:18712370-18717412|chr1:18724367-18730171	0	0	0	0	0	0	1	1	0	0	0	0	0	0	0	0	0	0	0	0	0	0	0	0	0	0	0.990325	0	0	0	0	0	0
mmu_circ_001034	chr1_187524153_187529065_R	circRNA	Yes*	chr1	187524153	187529065	-	769	4912	5	0,1224,2968,3318,4767	159,200,115,150,145	187524153,187525377,187527121,187527471,187528920	187524312,187525577,187527236,187527621,187529065	PREDICTED.2848.1	chr1:187521592-187524153|chr1:187529065-187529965	0	0	0	0	0	0	0	0	0	0	0	0	0	0	0	0	0	0	0	0	0	1	0	0	0	0	0	0	0	0	0.430566	0	0
mmu_circ_001037	chr1_187527121_187529065_R	circRNA	Yes	chr1	187527121	187529065	-	410	1944	3	0,350,1799	115,150,145	187527121,187527471,187528920	187527236,187527621,187529065	PREDICTED.2848.2	chr1:187525577-187527121|chr1:187529065-187529965	1	0	0	0	0	0	1	0	2	0	0	1	0	1	0	0	1	1	0	0	1	0	0	0	0	1.04496	0.990325	0	0	0	0	0	0.705287
mmu_circ_001040	chr1_187723622_187724994_F	circRNA	Yes	chr1	187723622	187724994	+	521	1372	3	0,994,1153	215,87,219	187723622,187724616,187724775	187723837,187724703,187724994	ENSMMUT00000021137	chr1:187711867-187723622|chr1:187724994-187725051	0	0	0	0	0	0	1	0	0	0	0	0	0	0	1	0	0	0	0	0	0	0	0	0	0	0	0.990325	0	0	0	0	0	0
mmu_circ_001045	chr1_189726540_189735396_F	circRNA	Yes	chr1	189726540	189735396	+	391	8856	4	0,3465,5222,8761	63,126,107,95	189726540,189730005,189731762,189735301	189726603,189730131,189731869,189735396	ENSMMUT00000028139	chr1:189717058-189726540|chr1:189735396-189743734	0	0	0	1	1	1	1	1	0	0	0	2	1	1	2	1	1	0	0	0	0	0	0	0	0	0	0.990325	0.688568	0	0	0	0	0
mmu_circ_001046	chr1_189887267_189887854_R	circRNA	Yes	chr1	189887267	189887854	-	371	587	2	0,396	180,191	189887267,189887663	189887447,189887854	PREDICTED.2868.2	chr1:189877274-189887267|chr1:189887854-189901683	0	0	0	0	2	0	2	1	0	0	0	0	0	0	0	0	0	0	0	0	0	0	0	0	0	0	1.98065	0	0	0	0	0	0
mmu_circ_001050	chr1_190667309_190670352_R	circRNA	Yes	chr1	190667309	190670352	-	305	3043	2	0,2896	158,147	190667309,190670205	190667467,190670352	PREDICTED.5179.1	chr1:190657508-190667309|chr1:190670352-190677755	1	0	0	0	0	1	0	0	1	0	0	0	0	0	0	1	0	1	0	0	1	0	0	1	0	1.04496	0	0	0	0	0	0.401374	0.705287
mmu_circ_001052	chr1_190667309_190716323_R	circRNA	Yes	chr1	190667309	190716323	-	3515	49014	17	0,2896,10446,11018,11787,16290,20367,21340,22746,23298,27711,30712,33319,39965,41708,43585,48892	158,147,88,185,197,170,123,137,141,111,164,221,175,164,151,1061,122	190667309,190670205,190677755,190678327,190679096,190683599,190687676,190688649,190690055,190690607,190695020,190698021,190700628,190707274,190709017,190710894,190716201	190667467,190670352,190677843,190678512,190679293,190683769,190687799,190688786,190690196,190690718,190695184,190698242,190700803,190707438,190709168,190711955,190716323	PREDICTED.2687.2	chr1:190657508-190667309|chr1:190716323-190717328	0	0	0	0	0	0	0	0	0	0	0	0	0	0	0	0	0	2	0	0	0	0	0	0	0	0	0	0	0	0	0	0	1.41057
mmu_circ_001054	chr1_190683599_190716323_R	circRNA	Yes*	chr1	190683599	190716323	-	2740	32724	12	0,4077,5050,6456,7008,11421,14422,17029,23675,25418,27295,32602	170,123,137,141,111,164,221,175,164,151,1061,122	190683599,190687676,190688649,190690055,190690607,190695020,190698021,190700628,190707274,190709017,190710894,190716201	190683769,190687799,190688786,190690196,190690718,190695184,190698242,190700803,190707438,190709168,190711955,190716323	PREDICTED.4422.6	chr1:190679293-190683599|chr1:190716323-190717328	0	0	0	0	0	0	0	0	0	0	0	0	1	0	0	0	0	0	0	0	0	0	0	0	0	0	0	0.688568	0	0	0	0	0
mmu_circ_001057	chr1_190707274_190716323_R	circRNA	Yes	chr1	190707274	190716323	-	1498	9049	4	0,1743,3620,8927	164,151,1061,122	190707274,190709017,190710894,190716201	190707438,190709168,190711955,190716323	PREDICTED.2953.1	chr1:190700803-190707274|chr1:190716323-190717328	0	0	0	0	0	0	0	1	0	0	0	0	0	0	0	0	0	0	1	0	0	1	0	0	0.613597	0	0	0	0	0	0.430566	0	0
mmu_circ_001058	chr1_190710894_190716323_R	circRNA	Yes	chr1	190710894	190716323	-	1183	5429	2	0,5307	1061,122	190710894,190716201	190711955,190716323	PREDICTED.3854.1	chr1:190709168-190710894|chr1:190716323-190717328	0	0	0	0	0	0	0	0	0	0	0	1	0	0	2	0	0	0	0	0	0	0	0	0	0	0	0	0	0	0	0	0	0
mmu_circ_001060	chr1_190725231_190728847_R	circRNA	Yes*	chr1	190725231	190728847	-	228	3616	2	0,3502	114,114	190725231,190728733	190725345,190728847	PREDICTED.3854.3	chr1:190719869-190725231|chr1:190728847-190735529	0	0	0	0	0	0	0	0	0	0	0	0	0	0	1	0	0	0	0	0	0	0	0	0	0	0	0	0	0	0	0	0	0
mmu_circ_001062	chr1_190735529_190747005_R	circRNA	Yes	chr1	190735529	190747005	-	1031	11476	5	0,5552,7030,10360,11390	623,160,115,47,86	190735529,190741081,190742559,190745889,190746919	190736152,190741241,190742674,190745936,190747005	ENSMMUT00000003017	chr1:190728847-190735529|chr1:190747005-190778328	0	0	0	0	0	0	0	0	0	0	0	0	0	0	0	0	0	0	1	0	3	0	0	0	0.613597	0	0	0	0	0	0	0	0
mmu_circ_001063	chr1_190741081_190747005_R	circRNA	Yes	chr1	190741081	190747005	-	408	5924	4	0,1478,4808,5838	160,115,47,86	190741081,190742559,190745889,190746919	190741241,190742674,190745936,190747005	ENSMMUT00000003017	chr1:190736152-190741081|chr1:190747005-190778328	0	0	0	1	0	0	0	0	0	0	0	0	0	0	0	1	0	0	0	0	0	0	0	0	0	0	0	0	0	0	0	0	0
mmu_circ_001066	chr1_19096962_19108469_R	circRNA	Yes*	chr1	19096962	19108469	-	252	11507	2	0,11390	135,117	19096962,19108352	19097097,19108469	PREDICTED.741.1	chr1:19060779-19096962|chr1:19108469-19117778	0	0	0	0	0	0	0	0	0	0	0	0	0	0	0	1	0	0	0	0	0	0	0	0	0	0	0	0	0	0	0	0	0
mmu_circ_001067	chr1_19108352_19118045_R	circRNA	Yes	chr1	19108352	19118045	-	384	9693	2	0,9426	117,267	19108352,19117778	19108469,19118045	PREDICTED.741.1	chr1:19097097-19108352|chr1:19118045-19148656	0	0	0	0	0	0	0	0	1	0	0	0	0	0	1	0	1	0	0	0	0	0	0	0	0	0	0	0	0	0	0	0	0
mmu_circ_001069	chr1_191400671_191401978_R	circRNA	Yes	chr1	191400671	191401978	-	197	1307	2	0,1209	99,98	191400671,191401880	191400770,191401978	ENSMMUT00000005330	chr1:191399031-191400671|chr1:191401978-191404566	0	0	0	0	0	0	2	0	1	0	0	0	0	0	0	0	0	0	0	0	0	0	0	0	0	0	1.98065	0	0	0	0	0	0
mmu_circ_001070	chr1_191406667_191408458_R	circRNA	Yes	chr1	191406667	191408458	-	444	1791	3	0,610,1508	82,79,283	191406667,191407277,191408175	191406749,191407356,191408458	PREDICTED.5070.4	chr1:191406039-191406667|chr1:191408458-191410184	1	0	0	0	0	0	0	0	0	0	0	0	0	0	0	0	1	0	0	0	0	0	0	0	0	1.04496	0	0	0	0	0	0	0
mmu_circ_001076	chr1_191674566_191675138_R	circRNA	Yes	chr1	191674566	191675138	-	364	572	2	0,400	192,172	191674566,191674966	191674758,191675138	PREDICTED.6384.1	chr1:191672274-191674566|chr1:191675138-191684439	1	0	0	0	1	0	0	0	0	0	0	0	0	2	0	0	0	0	0	0	0	0	0	0	0	1.04496	0	0	0	0	0	0	0
mmu_circ_001082	chr1_194647804_194667420_F	circRNA	Yes	chr1	194647804	194667420	+	732	19616	4	0,7170,14982,19456	245,191,136,160	194647804,194654974,194662786,194667260	194648049,194655165,194662922,194667420	PREDICTED.5366.1	chr1:194647735-194647804|chr1:194667420-194676815	0	0	0	0	0	0	0	0	0	0	0	0	1	0	0	0	0	0	1	0	0	0	0	0	0.613597	0	0	0.688568	0	0	0	0	0
mmu_circ_001084	chr1_194675351_194676905_F	circRNA	Yes	chr1	194675351	194676905	+	203	1554	2	0,1464	113,90	194675351,194676815	194675464,194676905	ENSMMUT00000026851	chr1:194667420-194675351|chr1:194676905-194702321	1	0	0	0	0	0	2	0	0	0	0	0	1	0	0	2	0	0	0	1	0	1	0	0	0	1.04496	1.98065	0.688568	0	0	0.430566	0	0
mmu_circ_001087	chr1_19554709_19555458_F	circRNA	Yes	chr1	19554709	19555458	+	498	749	4	0,278,440,583	186,84,62,166	19554709,19554987,19555149,19555292	19554895,19555071,19555211,19555458	ENSMMUT00000010223	chr1:19549894-19554709|chr1:19555458-19556250	0	1	0	0	0	0	1	0	0	0	0	0	0	0	0	0	1	2	0	0	0	0	0	0	0	0	0.990325	0	1.55173	0	0	0	1.41057
mmu_circ_001088	chr1_195738254_195739376_F	circRNA	Yes	chr1	195738254	195739376	+	257	1122	2	0,1025	160,97	195738254,195739279	195738414,195739376	ENSMMUT00000000821	chr1:195674972-195738254|chr1:195739376-195744244	1	0	0	0	0	0	0	0	0	0	0	0	0	1	0	0	0	0	0	0	0	0	0	0	0	1.04496	0	0	0	0	0	0	0
mmu_circ_001090	chr1_19650552_19652018_R	circRNA	Yes	chr1	19650552	19652018	-	225	1466	2	0,1364	123,102	19650552,19651916	19650675,19652018	ENSMMUT00000002285	chr1:19646920-19650552|chr1:19652018-19655988	0	0	0	0	0	1	1	0	0	0	0	0	0	0	0	0	0	0	0	0	0	0	0	0	0	0	0.990325	0	0	0	0	0	0
mmu_circ_001091	chr1_196580081_196581800_R	circRNA	Yes	chr1	196580081	196581800	-	308	1719	2	0,1621	210,98	196580081,196581702	196580291,196581800	ENSMMUT00000025003	chr1:196578193-196580081|chr1:196581800-196587025	1	0	0	0	0	0	1	1	0	1	0	0	0	0	0	0	0	0	0	0	0	0	0	0	0	1.04496	0.990325	0	0	0	0	0	0
mmu_circ_001094	chr1_19703207_19703907_R	ciRNA	Yes*	chr1	19703207	19703907	-	700	700	1	0	700	19703207	19703907	ENSMMUT00000002293	chr1:19703177-19703907	0	0	0	0	0	0	1	0	0	0	0	0	0	0	0	0	0	0	0	0	0	0	0	0	0	0	0.990325	0	0	0	0	0	0
mmu_circ_001098	chr1_197117037_197122523_F	circRNA	Yes	chr1	197117037	197122523	+	269	5486	2	0,5312	95,174	197117037,197122349	197117132,197122523	PREDICTED.5191.1	chr1:197110198-197117037|chr1:197122523-197129445	1	0	0	0	0	0	0	0	0	0	0	0	0	0	0	0	1	0	0	0	0	0	0	0	0	1.04496	0	0	0	0	0	0	0
mmu_circ_001100	chr1_197430737_197434488_F	circRNA	Yes	chr1	197430737	197434488	+	948	3751	2	0,3007	204,744	197430737,197433744	197430941,197434488	PREDICTED.3094.2	chr1:197422226-197430737|chr1:197434488-197441450	2	0	0	0	0	0	0	0	0	1	0	0	0	0	1	0	1	0	0	0	0	0	0	0	0	2.08991	0	0	0	0	0	0	0
mmu_circ_001103	chr1_197611792_197621912_R	circRNA	Yes	chr1	197611792	197621912	-	281	10120	2	0,10031	192,89	197611792,197621823	197611984,197621912	ENSMMUT00000014527	chr1:197609002-197611792|chr1:197621912-197623039	0	0	0	2	0	0	0	0	0	0	0	0	0	0	0	0	0	0	0	0	0	0	0	0	0	0	0	0	0	0	0	0	0
mmu_circ_001105	chr1_197678773_197704439_F	circRNA	Yes	chr1	197678773	197704439	+	341	25666	3	0,14565,25480	62,93,186	197678773,197693338,197704253	197678835,197693431,197704439	ENSMMUT00000044690	chr1:197663590-197678773|chr1:197704439-197717221	7	1	3	1	0	0	0	5	3	0	3	3	4	0	14	0	8	0	3	0	0	2	0	0	1.84079	7.31469	0	2.75427	1.55173	2.97926	0.861132	0	0
mmu_circ_001107	chr1_197693338_197704439_F	circRNA	Yes	chr1	197693338	197704439	+	279	11101	2	0,10915	93,186	197693338,197704253	197693431,197704439	ENSMMUT00000014535	chr1:197678835-197693338|chr1:197704439-197717221	0	0	0	0	1	0	1	0	0	0	0	0	0	0	4	0	3	2	0	1	0	1	0	0	0	0	0.990325	0	0	0	0.430566	0	1.41057
mmu_circ_001112	chr1_197732314_197734622_F	circRNA	Yes	chr1	197732314	197734622	+	475	2308	3	0,1388,2047	94,120,261	197732314,197733702,197734361	197732408,197733822,197734622	ENSMMUT00000014539	chr1:197723305-197732314|chr1:197734622-197769525	0	0	0	0	1	0	1	0	0	0	0	0	2	1	2	0	0	1	0	0	0	0	0	0	0	0	0.990325	1.37714	0	0	0	0	0.705287
mmu_circ_001114	chr1_197747141_197776168_F	circRNA	Yes	chr1	197747141	197776168	+	880	29027	6	0,7266,22384,26839,28384,28699	171,60,118,116,87,328	197747141,197754407,197769525,197773980,197775525,197775840	197747312,197754467,197769643,197774096,197775612,197776168	ENSMMUT00000014535	chr1:197734622-197747141|chr1:197776168-197781767	0	0	0	0	0	0	0	1	2	0	1	2	1	0	1	0	0	0	0	0	0	0	0	0	0	0	0	0.688568	0	0	0	0	0
mmu_circ_001115	chr1_197747141_197798457_F	circRNA	Yes	chr1	197747141	197798457	+	1371	51316	10	0,7266,22384,26839,28384,28699,46447,48425,49219,51210	171,60,118,116,87,328,139,157,89,106	197747141,197754407,197769525,197773980,197775525,197775840,197793588,197795566,197796360,197798351	197747312,197754467,197769643,197774096,197775612,197776168,197793727,197795723,197796449,197798457	PREDICTED.4891.1	chr1:197734622-197747141|chr1:197798457-197804903	0	0	0	0	1	0	0	0	1	0	0	0	0	0	0	1	0	0	0	0	0	0	0	0	0	0	0	0	0	0	0	0	0
mmu_circ_001117	chr1_197754407_197776168_F	circRNA	Yes	chr1	197754407	197776168	+	709	21761	5	0,15118,19573,21118,21433	60,118,116,87,328	197754407,197769525,197773980,197775525,197775840	197754467,197769643,197774096,197775612,197776168	ENSMMUT00000014535	chr1:197747312-197754407|chr1:197776168-197781767	1	0	0	0	0	0	0	0	0	0	0	0	0	0	0	1	0	0	0	0	0	0	0	0	0	1.04496	0	0	0	0	0	0	0
mmu_circ_001118	chr1_197769525_197776168_F	circRNA	Yes	chr1	197769525	197776168	+	649	6643	4	0,4455,6000,6315	118,116,87,328	197769525,197773980,197775525,197775840	197769643,197774096,197775612,197776168	ENSMMUT00000014539	chr1:197734622-197769525|chr1:197776168-197793588	5	1	0	2	1	2	2	5	2	0	1	0	1	0	5	3	0	1	1	0	5	0	0	1	0.613597	5.22478	1.98065	0.688568	1.55173	0	0	0.401374	0.705287
mmu_circ_001121	chr1_197773980_197776168_F	circRNA	Yes	chr1	197773980	197776168	+	531	2188	3	0,1545,1860	116,87,328	197773980,197775525,197775840	197774096,197775612,197776168	ENSMMUT00000014535	chr1:197769643-197773980|chr1:197776168-197781767	0	0	0	0	0	0	0	0	0	0	0	0	0	0	1	0	1	0	0	0	0	0	0	0	0	0	0	0	0	0	0	0	0
mmu_circ_001122	chr1_197773980_197798457_F	circRNA	Yes*	chr1	197773980	197798457	+	1022	24477	7	0,1545,1860,19608,21586,22380,24371	116,87,328,139,157,89,106	197773980,197775525,197775840,197793588,197795566,197796360,197798351	197774096,197775612,197776168,197793727,197795723,197796449,197798457	ENSMMUT00000014539	chr1:197769643-197773980|chr1:197798457-197804903	0	0	0	0	0	0	1	0	0	0	0	0	0	0	0	0	0	0	0	0	0	0	0	0	0	0	0.990325	0	0	0	0	0	0
mmu_circ_001123	chr1_197793588_197798457_F	circRNA	Yes	chr1	197793588	197798457	+	491	4869	4	0,1978,2772,4763	139,157,89,106	197793588,197795566,197796360,197798351	197793727,197795723,197796449,197798457	ENSMMUT00000014535	chr1:197781809-197793588|chr1:197798457-197804903	0	0	0	0	0	0	0	0	0	0	0	1	1	0	1	0	0	0	2	0	0	0	0	0	1.22719	0	0	0.688568	0	0	0	0	0
mmu_circ_001124	chr1_197795566_197798457_F	circRNA	Yes	chr1	197795566	197798457	+	352	2891	3	0,794,2785	157,89,106	197795566,197796360,197798351	197795723,197796449,197798457	ENSMMUT00000014535	chr1:197793727-197795566|chr1:197798457-197804903	0	1	0	0	0	0	0	0	0	0	0	0	1	0	0	0	0	0	0	0	0	0	0	0	0	0	0	0.688568	1.55173	0	0	0	0
mmu_circ_001136	chr1_201279912_201283106_F	circRNA	Yes	chr1	201279912	201283106	+	195	3194	2	0,3092	93,102	201279912,201283004	201280005,201283106	PREDICTED.4957.2	chr1:201278495-201279912|chr1:201283106-201286692	0	0	0	0	0	0	0	0	0	0	0	1	0	0	0	0	0	1	0	0	0	0	0	0	0	0	0	0	0	0	0	0	0.705287
mmu_circ_001137	chr1_201279912_201286894_F	circRNA	Yes	chr1	201279912	201286894	+	397	6982	3	0,3092,6780	93,102,202	201279912,201283004,201286692	201280005,201283106,201286894	PREDICTED.5361.2	chr1:201278495-201279912|chr1:201286894-201289480	1	0	0	0	0	0	2	1	0	0	0	0	1	0	0	0	0	0	0	0	0	0	0	0	0	1.04496	1.98065	0.688568	0	0	0	0	0
mmu_circ_001143	chr1_201825414_201946143_F	circRNA	Yes	chr1	201825414	201946143	+	224	120729	2	0,120619	114,110	201825414,201946033	201825528,201946143	ENSMMUT00000010160	chr1:201789835-201825414|chr1:201946143-202003362	0	0	0	0	0	0	0	0	0	2	0	0	0	0	2	0	2	0	0	0	0	0	0	0	0	0	0	0	0	0	0	0	0
mmu_circ_001145	chr1_20253424_20254479_F	ciRNA	Yes	chr1	20253424	20254479	+	1055	1055	1	0	1055	20253424	20254479	ENSMMUT00000015177	chr1:20253424-20254479	0	0	0	2	0	0	0	0	0	0	0	0	0	0	1	0	1	0	0	0	0	0	0	0	0	0	0	0	0	0	0	0	0
mmu_circ_001147	chr1_20266049_20268931_F	circRNA	Yes	chr1	20266049	20268931	+	298	2882	2	0,2766	182,116	20266049,20268815	20266231,20268931	ENSMMUT00000015177	chr1:20265968-20266049|chr1:20268931-20269488	0	0	0	2	0	0	0	0	0	0	0	1	1	0	0	0	0	2	0	0	0	0	0	0	0	0	0	0.688568	0	0	0	0	1.41057
mmu_circ_001150	chr1_203392248_203393800_F	circRNA	Yes	chr1	203392248	203393800	+	300	1552	2	0,1368	116,184	203392248,203393616	203392364,203393800	ENSMMUT00000023593	chr1:203389944-203392248|chr1:203393800-203398590	0	0	0	0	0	0	0	0	0	0	0	0	0	1	0	0	0	0	0	0	1	0	0	0	0	0	0	0	0	0	0	0	0
mmu_circ_001151	chr1_203392248_203398734_F	circRNA	Yes	chr1	203392248	203398734	+	444	6486	3	0,1368,6342	116,184,144	203392248,203393616,203398590	203392364,203393800,203398734	ENSMMUT00000023593	chr1:203389944-203392248|chr1:203398734-203407307	0	0	0	0	0	0	0	1	0	1	0	0	0	0	0	0	0	1	0	0	0	0	0	0	0	0	0	0	0	0	0	0	0.705287
mmu_circ_001156	chr1_203469890_203473038_F	circRNA	Yes	chr1	203469890	203473038	+	358	3148	3	0,1539,3040	70,180,108	203469890,203471429,203472930	203469960,203471609,203473038	ENSMMUT00000032079	chr1:203468744-203469890|chr1:203473038-203485152	0	0	0	0	0	0	1	0	0	0	0	0	0	0	0	0	0	0	0	0	1	0	0	0	0	0	0.990325	0	0	0	0	0	0
mmu_circ_001157	chr1_203584509_203586517_R	circRNA	Yes	chr1	203584509	203586517	-	290	2008	2	0,1834	116,174	203584509,203586343	203584625,203586517	ENSMMUT00000000906	chr1:203581881-203584509|chr1:203586517-203589169	0	0	0	0	0	0	0	1	1	0	0	0	0	0	0	0	0	0	0	0	0	0	0	0	0	0	0	0	0	0	0	0	0
mmu_circ_001159	chr1_203589169_203590287_R	circRNA	Yes	chr1	203589169	203590287	-	438	1118	3	0,270,904	133,91,214	203589169,203589439,203590073	203589302,203589530,203590287	ENSMMUT00000000906	chr1:203586517-203589169|chr1:203590287-203595044	0	0	0	0	2	0	0	0	0	0	0	0	0	1	0	0	0	0	0	0	1	0	0	0	0	0	0	0	0	0	0	0	0
mmu_circ_001162	chr1_203614614_203624591_R	circRNA	Yes	chr1	203614614	203624591	-	566	9977	4	0,1981,7497,9776	113,119,133,201	203614614,203616595,203622111,203624390	203614727,203616714,203622244,203624591	PREDICTED.3311.3	chr1:203608958-203614614|chr1:203624591-203628471	0	0	0	0	0	0	0	0	0	0	0	0	0	2	0	1	0	0	0	0	0	0	0	0	0	0	0	0	0	0	0	0	0
mmu_circ_001165	chr1_203871726_203874124_F	circRNA	Yes	chr1	203871726	203874124	+	364	2398	2	0,2205	171,193	203871726,203873931	203871897,203874124	PREDICTED.8822.3	chr1:203806127-203871726|chr1:203874124-203883775	0	0	0	0	0	0	0	0	2	0	0	0	0	0	0	0	0	0	0	0	0	0	0	0	0	0	0	0	0	0	0	0	0
mmu_circ_001167	chr1_203887800_203899011_F	circRNA	Yes*	chr1	203887800	203899011	+	444	11211	3	0,9090,11100	175,158,111	203887800,203896890,203898900	203887975,203897048,203899011	PREDICTED.8822.3	chr1:203883986-203887800|chr1:203899011-203918368	0	0	0	0	0	0	0	0	1	0	0	0	0	0	0	0	0	0	0	0	0	0	0	0	0	0	0	0	0	0	0	0	0
mmu_circ_001168	chr1_203896890_203945319_F	circRNA	Yes	chr1	203896890	203945319	+	748	48429	6	0,2010,21478,26315,30249,48287	158,111,67,103,167,142	203896890,203898900,203918368,203923205,203927139,203945177	203897048,203899011,203918435,203923308,203927306,203945319	PREDICTED.8822.3	chr1:203887975-203896890|chr1:203945319-204006915	0	0	0	0	0	0	0	2	0	0	0	0	1	0	0	0	0	0	1	0	0	0	0	0	0.613597	0	0	0.688568	0	0	0	0	0
mmu_circ_001169	chr1_205637474_205656184_R	circRNA	Yes*	chr1	205637474	205656184	-	452	18710	4	0,15526,16054,18566	117,82,109,144	205637474,205653000,205653528,205656040	205637591,205653082,205653637,205656184	ENSMMUT00000002932	chr1:205612618-205637474|chr1:205656184-205687437	0	0	0	0	0	0	0	0	0	0	0	0	0	0	0	1	0	0	0	0	0	0	0	0	0	0	0	0	0	0	0	0	0
mmu_circ_001171	chr1_205653000_205656184_R	circRNA	Yes	chr1	205653000	205656184	-	335	3184	3	0,528,3040	82,109,144	205653000,205653528,205656040	205653082,205653637,205656184	ENSMMUT00000002932	chr1:205637591-205653000|chr1:205656184-205687437	2	1	0	0	0	0	1	0	1	0	0	0	0	0	0	2	0	0	1	0	0	0	0	0	0.613597	2.08991	0.990325	0	1.55173	0	0	0	0
mmu_circ_001174	chr1_205687437_205691830_R	circRNA	Yes	chr1	205687437	205691830	-	251	4393	2	0,4278	136,115	205687437,205691715	205687573,205691830	ENSMMUT00000044569	chr1:205656184-205687437|chr1:205691830-205720849	5	2	0	1	5	3	11	6	6	2	3	5	5	9	18	4	12	12	4	3	3	1	0	2	2.45439	5.22478	10.8936	3.44284	3.10345	0	0.430566	0.802748	8.46345
mmu_circ_001175	chr1_205687437_205720907_R	circRNA	Yes	chr1	205687437	205720907	-	309	33470	3	0,4278,33412	136,115,58	205687437,205691715,205720849	205687573,205691830,205720907	ENSMMUT00000044569	chr1:205656184-205687437|chr1:205720907-205739379	2	0	0	0	0	0	0	0	0	1	0	0	3	0	2	0	0	1	0	0	0	0	0	0	0	2.08991	0	2.0657	0	0	0	0	0.705287
mmu_circ_001176	chr1_205687437_205740925_R	circRNA	Yes	chr1	205687437	205740925	-	388	53488	4	0,4278,51942,53428	136,115,77,60	205687437,205691715,205739379,205740865	205687573,205691830,205739456,205740925	PREDICTED.5554.2	chr1:205656184-205687437|chr1:205740925-205754241	0	0	0	0	0	0	2	0	0	0	0	0	0	0	0	0	0	0	0	0	0	0	0	0	0	0	1.98065	0	0	0	0	0	0
mmu_circ_001177	chr1_205687437_205740925_R	circRNA	Yes	chr1	205687437	205740925	-	446	53488	5	0,4278,33412,51942,53428	136,115,58,77,60	205687437,205691715,205720849,205739379,205740865	205687573,205691830,205720907,205739456,205740925	ENSMMUT00000044568	chr1:205656184-205687437|chr1:205740925-205754241	0	0	0	0	0	0	0	1	0	0	0	0	0	0	3	0	0	0	2	0	0	0	0	0	1.22719	0	0	0	0	0	0	0	0
mmu_circ_001179	chr1_205720849_205740925_R	circRNA	Yes	chr1	205720849	205740925	-	195	20076	3	0,18530,20016	58,77,60	205720849,205739379,205740865	205720907,205739456,205740925	PREDICTED.5554.6	chr1:205691830-205720849|chr1:205740925-205754241	0	0	0	0	0	0	4	0	0	0	0	0	0	0	0	0	0	0	0	0	0	0	0	0	0	0	3.9613	0	0	0	0	0	0
mmu_circ_001181	chr1_205739379_205781491_R	circRNA	Yes*	chr1	205739379	205781491	-	304	42112	4	0,1486,14862,42014	77,60,69,98	205739379,205740865,205754241,205781393	205739456,205740925,205754310,205781491	ENSMMUT00000044568	chr1:205720907-205739379|chr1:205781491-205789222	0	0	0	0	0	0	0	0	0	0	0	0	0	0	0	0	0	0	0	0	1	0	0	0	0	0	0	0	0	0	0	0	0
mmu_circ_001182	chr1_205768771_205769782_R	circRNA	Yes	chr1	205768771	205769782	-	197	1011	2	0,934	120,77	205768771,205769705	205768891,205769782	PREDICTED.5554.2	chr1:205754310-205768771|chr1:205769782-205781393	0	0	0	0	0	0	4	1	0	0	0	0	0	0	0	0	1	1	0	0	0	0	0	0	0	0	3.9613	0	0	0	0	0	0.705287
mmu_circ_001184	chr1_205768771_205781491_R	circRNA	Yes	chr1	205768771	205781491	-	295	12720	3	0,934,12622	120,77,98	205768771,205769705,205781393	205768891,205769782,205781491	ENSMMUT00000044569	chr1:205754310-205768771|chr1:205781491-205789222	0	1	0	0	0	0	0	0	0	0	0	0	0	0	0	0	0	1	0	0	0	0	0	0	0	0	0	0	1.55173	0	0	0	0.705287
mmu_circ_001186	chr1_205768771_205789282_R	circRNA	Yes	chr1	205768771	205789282	-	355	20511	4	0,934,12622,20451	120,77,98,60	205768771,205769705,205781393,205789222	205768891,205769782,205781491,205789282	ENSMMUT00000044569	chr1:205754310-205768771|chr1:205789282-205811443	0	0	0	0	0	0	1	0	0	0	0	0	1	0	0	1	0	0	0	0	0	0	0	0	0	0	0.990325	0.688568	0	0	0	0	0
mmu_circ_001189	chr1_209821356_209822163_F	circRNA	Yes	chr1	209821356	209822163	+	188	807	2	0,746	127,61	209821356,209822102	209821483,209822163	ENSMMUT00000028785	chr1:209802229-209821356|chr1:209822163-209825031	2	0	0	0	0	0	0	0	0	0	0	0	0	0	0	0	0	0	0	0	0	0	0	0	0	2.08991	0	0	0	0	0	0	0
mmu_circ_001190	chr1_210070219_210076315_F	circRNA	Yes	chr1	210070219	210076315	+	563	6096	3	0,2304,5915	128,254,181	210070219,210072523,210076134	210070347,210072777,210076315	PREDICTED.8884.1	chr1:210056340-210070219|chr1:210076315-210082386	3	0	2	1	1	1	0	0	0	0	0	0	0	1	0	0	2	0	0	0	0	0	0	0	0	3.13487	0	0	0	1.98617	0	0	0
mmu_circ_001194	chr1_210092709_210096863_F	circRNA	Yes	chr1	210092709	210096863	+	310	4154	3	0,2874,4064	129,91,90	210092709,210095583,210096773	210092838,210095674,210096863	PREDICTED.5176.1	chr1:210091302-210092709|chr1:210096863-210099966	0	0	0	0	0	0	0	0	0	0	0	0	0	0	0	0	0	0	0	0	2	0	0	0	0	0	0	0	0	0	0	0	0
mmu_circ_001197	chr1_210103686_210104999_F	circRNA	Yes	chr1	210103686	210104999	+	328	1313	3	0,284,1166	124,57,147	210103686,210103970,210104852	210103810,210104027,210104999	ENSMMUT00000023043	chr1:210101916-210103686|chr1:210104999-210106830	0	0	0	0	1	0	0	0	0	0	1	0	0	0	0	2	0	0	0	0	0	0	0	0	0	0	0	0	0	0	0	0	0
mmu_circ_001198	chr1_210103686_210107018_F	circRNA	Yes*	chr1	210103686	210107018	+	516	3332	4	0,284,1166,3144	124,57,147,188	210103686,210103970,210104852,210106830	210103810,210104027,210104999,210107018	PREDICTED.3406.1	chr1:210101916-210103686|chr1:210107018-210115490	0	0	0	0	0	0	0	0	1	0	0	0	0	0	0	0	0	0	0	0	0	0	0	0	0	0	0	0	0	0	0	0	0
mmu_circ_001200	chr1_210103686_210125071_F	circRNA	Yes	chr1	210103686	210125071	+	1095	21385	8	0,284,1166,3144,11804,12025,12943,21234	124,57,147,188,145,132,151,151	210103686,210103970,210104852,210106830,210115490,210115711,210116629,210124920	210103810,210104027,210104999,210107018,210115635,210115843,210116780,210125071	ENSMMUT00000023043	chr1:210101916-210103686|chr1:210125071-210125678	2	1	0	0	0	0	0	0	2	0	0	0	2	0	0	0	1	1	0	1	0	1	0	0	0	2.08991	0	1.37714	1.55173	0	0.430566	0	0.705287
mmu_circ_001201	chr1_210103686_210131665_F	circRNA	Yes	chr1	210103686	210131665	+	1880	27979	11	0,284,1166,3144,11804,12025,12943,21234,25055,26727,27582	124,57,147,188,145,132,151,151,193,195,397	210103686,210103970,210104852,210106830,210115490,210115711,210116629,210124920,210128741,210130413,210131268	210103810,210104027,210104999,210107018,210115635,210115843,210116780,210125071,210128934,210130608,210131665	PREDICTED.5341.1	chr1:210101916-210103686|chr1:210131665-210131826	0	0	0	0	0	0	0	0	0	0	0	0	0	0	1	0	0	1	0	0	0	0	0	0	0	0	0	0	0	0	0	0	0.705287
mmu_circ_001202	chr1_210103686_210131665_F	circRNA	Yes	chr1	210103686	210131665	+	1988	27979	12	0,284,1166,3144,11804,12025,12943,21234,21992,25055,26727,27582	124,57,147,188,145,132,151,151,108,193,195,397	210103686,210103970,210104852,210106830,210115490,210115711,210116629,210124920,210125678,210128741,210130413,210131268	210103810,210104027,210104999,210107018,210115635,210115843,210116780,210125071,210125786,210128934,210130608,210131665	ENSMMUT00000023043	chr1:210101916-210103686|chr1:210131665-210135030	1	0	0	0	1	0	0	0	0	0	0	0	0	0	0	0	0	0	0	0	1	0	0	0	0	1.04496	0	0	0	0	0	0	0
mmu_circ_001204	chr1_210103686_210140654_F	circRNA	Yes	chr1	210103686	210140654	+	2419	36968	15	0,284,1166,3144,11804,12025,12943,21234,21992,25055,26727,27582,31344,34090,36759	124,57,147,188,145,132,151,151,108,193,195,397,124,98,209	210103686,210103970,210104852,210106830,210115490,210115711,210116629,210124920,210125678,210128741,210130413,210131268,210135030,210137776,210140445	210103810,210104027,210104999,210107018,210115635,210115843,210116780,210125071,210125786,210128934,210130608,210131665,210135154,210137874,210140654	ENSMMUT00000023043	chr1:210101916-210103686|chr1:210140654-210143581	1	0	0	0	1	0	1	1	1	0	0	0	1	0	2	0	0	0	0	0	0	0	0	0	0	1.04496	0.990325	0.688568	0	0	0	0	0
mmu_circ_001205	chr1_210106830_210125071_F	circRNA	Yes	chr1	210106830	210125071	+	767	18241	5	0,8660,8881,9799,18090	188,145,132,151,151	210106830,210115490,210115711,210116629,210124920	210107018,210115635,210115843,210116780,210125071	ENSMMUT00000023043	chr1:210104999-210106830|chr1:210125071-210125678	3	0	0	3	0	0	3	2	1	0	0	2	1	0	9	7	0	4	2	0	5	1	0	2	1.22719	3.13487	2.97097	0.688568	0	0	0.430566	0.802748	2.82115
mmu_circ_001207	chr1_210115490_210125071_F	circRNA	Yes	chr1	210115490	210125071	+	579	9581	4	0,221,1139,9430	145,132,151,151	210115490,210115711,210116629,210124920	210115635,210115843,210116780,210125071	ENSMMUT00000023043	chr1:210107018-210115490|chr1:210125071-210125678	1	0	0	0	0	0	0	0	0	0	0	0	0	0	0	0	0	0	0	0	1	0	0	0	0	1.04496	0	0	0	0	0	0	0
mmu_circ_001208	chr1_210125678_210131665_F	circRNA	Yes*	chr1	210125678	210131665	+	893	5987	4	0,3063,4735,5590	108,193,195,397	210125678,210128741,210130413,210131268	210125786,210128934,210130608,210131665	ENSMMUT00000023043	chr1:210125071-210125678|chr1:210131665-210135030	0	0	0	0	0	0	1	0	0	0	0	0	0	0	0	0	0	0	0	0	0	0	0	0	0	0	0.990325	0	0	0	0	0	0
mmu_circ_001209	chr1_210125678_210135154_F	circRNA	Yes	chr1	210125678	210135154	+	1017	9476	5	0,3063,4735,5590,9352	108,193,195,397,124	210125678,210128741,210130413,210131268,210135030	210125786,210128934,210130608,210131665,210135154	ENSMMUT00000023043	chr1:210125071-210125678|chr1:210135154-210137776	0	2	0	0	1	0	1	0	0	0	0	0	1	1	2	0	0	3	0	0	2	0	0	0	0	0	0.990325	0.688568	3.10345	0	0	0	2.11586
mmu_circ_001210	chr1_210425205_210425635_R	circRNA	Yes*	chr1	210425205	210425635	-	430	430	1	0	430	210425205	210425635	PREDICTED.3241.1	chr1:210396551-210425205|chr1:210425635-210447186	0	0	0	0	0	0	0	0	0	0	0	0	0	0	1	0	0	0	0	0	0	0	0	0	0	0	0	0	0	0	0	0	0
mmu_circ_001212	chr1_210469690_210483599_F	circRNA	Yes	chr1	210469690	210483599	+	617	13909	5	0,805,6543,9568,13748	154,149,90,63,161	210469690,210470495,210476233,210479258,210483438	210469844,210470644,210476323,210479321,210483599	ENSMMUT00000032256	chr1:210463840-210469690|chr1:210483599-210491188	0	0	0	0	0	0	1	0	0	0	0	0	0	0	0	1	0	0	0	0	0	0	0	0	0	0	0.990325	0	0	0	0	0	0
mmu_circ_001214	chr1_211094585_211109087_F	circRNA	Yes	chr1	211094585	211109087	+	282	14502	3	0,1980,14391	68,103,111	211094585,211096565,211108976	211094653,211096668,211109087	ENSMMUT00000008109	chr1:210706748-211094585|chr1:211109087-211163033	0	0	0	0	0	0	0	0	1	0	0	0	0	0	0	3	0	0	0	0	0	0	0	0	0	0	0	0	0	0	0	0	0
mmu_circ_001215	chr1_211163033_211168694_F	circRNA	Yes	chr1	211163033	211168694	+	263	5661	2	0,5486	88,175	211163033,211168519	211163121,211168694	PREDICTED.6993.4	chr1:211109087-211163033|chr1:211168694-211253589	0	0	0	0	0	0	0	0	0	0	3	0	0	0	0	0	0	0	0	1	0	0	0	0	0	0	0	0	0	0	0	0	0
mmu_circ_001219	chr1_212207466_212207914_F	ciRNA	Yes	chr1	212207466	212207914	+	448	448	1	0	448	212207466	212207914	PREDICTED.5315.1	chr1:212207466-212207916	0	0	0	0	0	0	0	0	0	0	0	0	0	1	1	0	0	0	0	0	0	0	0	0	0	0	0	0	0	0	0	0	0
mmu_circ_001220	chr1_212207466_212207915_F	ciRNA	Yes	chr1	212207466	212207915	+	449	449	1	0	449	212207466	212207915	PREDICTED.5315.1	chr1:212207466-212207916	0	0	0	0	1	0	0	1	0	1	0	0	3	3	2	1	3	0	0	0	3	0	0	0	0	0	0	2.0657	0	0	0	0	0
mmu_circ_001227	chr1_212474027_212477133_R	circRNA	Yes	chr1	212474027	212477133	-	187	3106	2	0,3006	87,100	212474027,212477033	212474114,212477133	ENSMMUT00000000026	chr1:212449205-212474027|chr1:212477133-212489198	1	0	0	0	0	0	0	0	0	0	0	0	0	0	1	0	0	0	0	0	0	0	0	0	0	1.04496	0	0	0	0	0	0	0
mmu_circ_001228	chr1_212521770_212530855_R	circRNA	Yes	chr1	212521770	212530855	-	971	9085	2	0,8592	478,493	212521770,212530362	212522248,212530855	ENSMMUT00000044492	chr1:212510879-212521770|chr1:212530855-212602065	0	0	0	0	0	0	0	1	0	0	0	0	5	0	1	1	1	0	0	1	1	0	0	0	0	0	0	3.44284	0	0	0	0	0
mmu_circ_001232	chr1_212566226_212604623_R	circRNA	Yes	chr1	212566226	212604623	-	422	38397	6	0,19773,25252,35839,37962,38323	107,78,25,68,70,74	212566226,212585999,212591478,212602065,212604188,212604549	212566333,212586077,212591503,212602133,212604258,212604623	ENSMMUT00000000026	chr1:212530855-212566226|chr1:212604623-212618306	0	0	0	0	1	0	0	0	1	0	0	0	0	0	0	0	0	0	0	0	0	0	0	0	0	0	0	0	0	0	0	0	0
mmu_circ_001233	chr1_212585999_212604623_R	circRNA	Yes	chr1	212585999	212604623	-	290	18624	4	0,16066,18189,18550	78,68,70,74	212585999,212602065,212604188,212604549	212586077,212602133,212604258,212604623	PREDICTED.5185.1	chr1:212510583-212585999|chr1:212604623-212620782	0	0	0	0	0	0	0	0	0	2	0	0	8	0	0	0	7	0	3	0	14	0	0	0	1.84079	0	0	5.50854	0	0	0	0	0
mmu_circ_001234	chr1_212585999_212604623_R	circRNA	Yes	chr1	212585999	212604623	-	315	18624	5	0,5479,16066,18189,18550	78,25,68,70,74	212585999,212591478,212602065,212604188,212604549	212586077,212591503,212602133,212604258,212604623	ENSMMUT00000000026	chr1:212566333-212585999|chr1:212604623-212618306	5	0	4	15	18	7	5	17	6	0	0	0	0	0	29	4	0	15	0	0	0	0	0	0	0	5.22478	4.95162	0	0	3.97234	0	0	10.5793
mmu_circ_001235	chr1_212602065_212604623_R	circRNA	Yes*	chr1	212602065	212604623	-	212	2558	3	0,2123,2484	68,70,74	212602065,212604188,212604549	212602133,212604258,212604623	ENSMMUT00000000026	chr1:212591503-212602065|chr1:212604623-212618306	0	0	0	0	0	0	0	1	0	0	0	0	0	0	0	0	0	0	0	0	0	0	0	0	0	0	0	0	0	0	0	0	0
mmu_circ_001237	chr1_212664882_212666697_F	circRNA	Yes*	chr1	212664882	212666697	+	223	1815	2	0,1717	125,98	212664882,212666599	212665007,212666697	ENSMMUT00000000024	chr1:212663874-212664882|chr1:212666697-212671393	0	0	0	0	0	0	0	0	0	0	0	0	0	0	1	0	0	0	0	0	0	0	0	0	0	0	0	0	0	0	0	0	0
mmu_circ_001238	chr1_213251643_213398478_F	circRNA	Yes	chr1	213251643	213398478	+	284	146835	2	0,146709	158,126	213251643,213398352	213251801,213398478	ENSMMUT00000044491	chr1:213251380-213251643|chr1:213398478-213431280	2	0	1	1	1	0	0	1	0	0	0	1	1	1	4	0	0	2	0	0	1	0	0	0	0	2.08991	0	0.688568	0	0.993085	0	0	1.41057
mmu_circ_001239	chr1_213251643_213431392_F	circRNA	Yes	chr1	213251643	213431392	+	396	179749	3	0,146709,179637	158,126,112	213251643,213398352,213431280	213251801,213398478,213431392	PREDICTED.5769.1	chr1:213251380-213251643|chr1:213431392-213453156	0	0	0	0	0	0	1	0	0	0	0	0	0	0	0	0	0	0	0	1	0	0	0	0	0	0	0.990325	0	0	0	0	0	0
mmu_circ_001240	chr1_213251643_213453301_F	circRNA	Yes*	chr1	213251643	213453301	+	541	201658	4	0,146709,179637,201513	158,126,112,145	213251643,213398352,213431280,213453156	213251801,213398478,213431392,213453301	PREDICTED.3358.1	chr1:213251380-213251643|chr1:213453301-213461447	0	0	0	0	0	0	0	0	0	0	0	0	0	0	0	0	0	0	1	0	0	0	0	0	0.613597	0	0	0	0	0	0	0	0
mmu_circ_001241	chr1_213251643_213461579_F	circRNA	Yes	chr1	213251643	213461579	+	673	209936	5	0,146709,179637,201513,209804	158,126,112,145,132	213251643,213398352,213431280,213453156,213461447	213251801,213398478,213431392,213453301,213461579	PREDICTED.5769.1	chr1:213251380-213251643|chr1:213461579-213485482	0	0	0	0	1	0	0	0	0	0	0	0	0	0	1	0	1	0	0	1	0	0	0	0	0	0	0	0	0	0	0	0	0
mmu_circ_001242	chr1_213251643_213486980_F	circRNA	Yes	chr1	213251643	213486980	+	808	235337	7	0,146709,179637,201513,209804,233839,235268	158,126,112,145,132,66,69	213251643,213398352,213431280,213453156,213461447,213485482,213486911	213251801,213398478,213431392,213453301,213461579,213485548,213486980	PREDICTED.5769.1	chr1:213251380-213251643|chr1:213486980-213527410	4	0	0	0	0	0	0	0	0	0	0	0	0	0	0	0	0	0	0	0	0	0	0	1	0	4.17982	0	0	0	0	0	0.401374	0
mmu_circ_001243	chr1_213251643_213527533_F	circRNA	Yes	chr1	213251643	213527533	+	931	275890	8	0,146709,179637,201513,209804,233839,235268,275767	158,126,112,145,132,66,69,123	213251643,213398352,213431280,213453156,213461447,213485482,213486911,213527410	213251801,213398478,213431392,213453301,213461579,213485548,213486980,213527533	PREDICTED.5769.1	chr1:213251380-213251643|chr1:213527533-213536668	0	0	0	0	0	0	0	0	0	0	0	0	0	1	0	1	0	0	0	0	0	0	0	0	0	0	0	0	0	0	0	0	0
mmu_circ_001244	chr1_213251643_213536797_F	circRNA	Yes*	chr1	213251643	213536797	+	1107	285154	10	0,146709,167890,179637,201513,209804,233839,235268,275767,285025	158,126,47,112,145,132,66,69,123,129	213251643,213398352,213419533,213431280,213453156,213461447,213485482,213486911,213527410,213536668	213251801,213398478,213419580,213431392,213453301,213461579,213485548,213486980,213527533,213536797	PREDICTED.3167.3	chr1:213251380-213251643|chr1:213536797-213547537	0	1	0	0	0	0	0	0	0	0	0	0	0	0	0	0	0	0	0	0	0	0	0	0	0	0	0	0	1.55173	0	0	0	0
mmu_circ_001246	chr1_213251643_213554979_F	circRNA	Yes	chr1	213251643	213554979	+	1363	303336	11	0,146709,179637,201513,209804,233839,235268,275767,285025,295894,303248	158,126,112,145,132,66,69,123,129,215,88	213251643,213398352,213431280,213453156,213461447,213485482,213486911,213527410,213536668,213547537,213554891	213251801,213398478,213431392,213453301,213461579,213485548,213486980,213527533,213536797,213547752,213554979	ENSMMUT00000044491	chr1:213251380-213251643|chr1:213554979-213590950	2	0	0	0	0	0	0	0	0	0	0	0	1	0	0	0	0	1	0	0	0	0	0	0	0	2.08991	0	0.688568	0	0	0	0	0.705287
mmu_circ_001247	chr1_213251643_213591053_F	circRNA	Yes	chr1	213251643	213591053	+	1466	339410	12	0,146709,179637,201513,209804,233839,235268,275767,285025,295894,303248,339307	158,126,112,145,132,66,69,123,129,215,88,103	213251643,213398352,213431280,213453156,213461447,213485482,213486911,213527410,213536668,213547537,213554891,213590950	213251801,213398478,213431392,213453301,213461579,213485548,213486980,213527533,213536797,213547752,213554979,213591053	PREDICTED.5769.1	chr1:213251380-213251643|chr1:213591053-213598245	1	0	0	0	1	0	0	0	0	0	0	1	0	0	0	0	0	0	0	0	0	0	0	0	0	1.04496	0	0	0	0	0	0	0
mmu_circ_001249	chr1_213398352_213461579_F	circRNA	Yes*	chr1	213398352	213461579	+	562	63227	5	0,21181,32928,54804,63095	126,47,112,145,132	213398352,213419533,213431280,213453156,213461447	213398478,213419580,213431392,213453301,213461579	PREDICTED.3167.3	chr1:213251801-213398352|chr1:213461579-213485482	0	1	0	0	0	0	0	0	0	0	0	0	0	0	0	0	0	0	0	0	0	0	0	0	0	0	0	0	1.55173	0	0	0	0
mmu_circ_001250	chr1_213398352_213486980_F	circRNA	Yes*	chr1	213398352	213486980	+	650	88628	6	0,32928,54804,63095,87130,88559	126,112,145,132,66,69	213398352,213431280,213453156,213461447,213485482,213486911	213398478,213431392,213453301,213461579,213485548,213486980	PREDICTED.4903.3	chr1:213251801-213398352|chr1:213486980-213527410	0	0	0	0	0	0	0	0	0	0	0	0	0	0	1	0	0	0	0	0	0	0	0	0	0	0	0	0	0	0	0	0	0
mmu_circ_001257	chr1_213527410_213554979_F	circRNA	Yes	chr1	213527410	213554979	+	555	27569	4	0,9258,20127,27481	123,129,215,88	213527410,213536668,213547537,213554891	213527533,213536797,213547752,213554979	PREDICTED.5769.1	chr1:213486980-213527410|chr1:213554979-213590950	2	0	0	0	0	0	0	0	0	0	0	0	0	0	0	2	2	0	0	0	0	0	0	0	0	2.08991	0	0	0	0	0	0	0
mmu_circ_001258	chr1_213536668_213554979_F	circRNA	Yes	chr1	213536668	213554979	+	432	18311	3	0,10869,18223	129,215,88	213536668,213547537,213554891	213536797,213547752,213554979	PREDICTED.7057.2	chr1:213527533-213536668|chr1:213554979-213590950	0	1	0	0	0	0	0	0	0	1	0	0	0	0	0	0	0	0	0	0	0	0	0	0	0	0	0	0	1.55173	0	0	0	0
mmu_circ_001259	chr1_213683697_213694497_R	circRNA	Yes	chr1	213683697	213694497	-	369	10800	3	0,8433,10672	132,109,128	213683697,213692130,213694369	213683829,213692239,213694497	ENSMMUT00000028100	chr1:213614552-213683697|chr1:213694497-213731587	0	1	0	4	5	0	1	3	3	2	1	1	3	2	2	2	10	2	1	0	0	1	0	0	0.613597	0	0.990325	2.0657	1.55173	0	0.430566	0	1.41057
mmu_circ_001260	chr1_213683697_213731730_R	circRNA	Yes	chr1	213683697	213731730	-	512	48033	4	0,8433,10672,47890	132,109,128,143	213683697,213692130,213694369,213731587	213683829,213692239,213694497,213731730	ENSMMUT00000028100	chr1:213614552-213683697|chr1:213731730-213765429	0	0	0	0	0	0	0	0	0	0	0	0	0	0	1	1	0	0	0	0	0	0	0	0	0	0	0	0	0	0	0	0	0
mmu_circ_001262	chr1_213765429_213778943_R	circRNA	Yes	chr1	213765429	213778943	-	405	13514	3	0,3210,13361	117,135,153	213765429,213768639,213778790	213765546,213768774,213778943	ENSMMUT00000028100	chr1:213731730-213765429|chr1:213778943-213792550	0	0	0	0	0	0	0	0	0	0	0	0	0	0	2	1	0	0	0	0	0	0	0	0	0	0	0	0	0	0	0	0	0
mmu_circ_001265	chr1_213803095_213806565_R	circRNA	Yes	chr1	213803095	213806565	-	254	3470	2	0,3405	189,65	213803095,213806500	213803284,213806565	ENSMMUT00000028100	chr1:213792689-213803095|chr1:213806565-213818305	0	0	0	0	0	0	0	0	0	0	0	0	1	0	0	0	0	1	0	0	0	0	0	0	0	0	0	0.688568	0	0	0	0	0.705287
mmu_circ_001266	chr1_213803095_213818434_R	circRNA	Yes	chr1	213803095	213818434	-	383	15339	3	0,3405,15210	189,65,129	213803095,213806500,213818305	213803284,213806565,213818434	ENSMMUT00000028100	chr1:213792689-213803095|chr1:213818434-213825382	0	0	0	0	0	0	0	0	0	0	0	1	0	0	0	0	0	1	0	0	0	0	0	0	0	0	0	0	0	0	0	0	0.705287
mmu_circ_001269	chr1_213818305_213840858_R	circRNA	Yes	chr1	213818305	213840858	-	605	22553	5	0,7077,17802,21591,22400	129,126,114,83,153	213818305,213825382,213836107,213839896,213840705	213818434,213825508,213836221,213839979,213840858	ENSMMUT00000028100	chr1:213806565-213818305|chr1:213840858-213852851	0	0	0	0	0	0	0	1	0	0	0	0	0	0	0	0	1	0	0	0	0	0	0	0	0	0	0	0	0	0	0	0	0
mmu_circ_001270	chr1_213836107_213840858_R	circRNA	Yes	chr1	213836107	213840858	-	350	4751	3	0,3789,4598	114,83,153	213836107,213839896,213840705	213836221,213839979,213840858	ENSMMUT00000028100	chr1:213825508-213836107|chr1:213840858-213852851	0	0	0	0	0	0	0	1	0	0	0	0	0	0	1	0	0	0	0	0	0	0	0	0	0	0	0	0	0	0	0	0	0
mmu_circ_001271	chr1_213836107_213840871_R	circRNA	Yes	chr1	213836107	213840871	-	363	4764	3	0,3789,4598	114,83,166	213836107,213839896,213840705	213836221,213839979,213840871	PREDICTED.9038.3	chr1:213825508-213836107|chr1:213840871-213852851	0	0	0	0	2	0	0	0	0	0	0	0	0	0	0	0	0	0	0	0	0	0	0	0	0	0	0	0	0	0	0	0	0
mmu_circ_001277	chr1_215540327_215543111_F	circRNA	Yes	chr1	215540327	215543111	+	349	2784	2	0,2618	183,166	215540327,215542945	215540510,215543111	ENSMMUT00000007968	chr1:215537250-215540327|chr1:215543111-215544845	0	0	0	0	0	0	0	0	0	0	0	0	0	2	0	0	0	0	0	0	0	0	0	0	0	0	0	0	0	0	0	0	0
mmu_circ_001278	chr1_21564997_21566407_R	circRNA	Yes	chr1	21564997	21566407	-	237	1410	2	0,1314	141,96	21564997,21566311	21565138,21566407	ENSMMUT00000006716	chr1:21563681-21564997|chr1:21566407-21567694	0	0	0	0	0	0	1	0	0	0	0	0	0	0	0	0	0	0	1	0	0	0	0	0	0.613597	0	0.990325	0	0	0	0	0	0
mmu_circ_001283	chr1_21826732_21830975_R	circRNA	Yes	chr1	21826732	21830975	-	870	4243	6	0,2066,2383,2648,3525,4163	122,230,126,183,129,80	21826732,21828798,21829115,21829380,21830257,21830895	21826854,21829028,21829241,21829563,21830386,21830975	PREDICTED.2544.6	chr1:21825497-21826732|chr1:21830975-21832538	0	0	0	0	0	0	0	0	0	0	0	0	1	0	1	0	0	0	0	0	0	0	0	0	0	0	0	0.688568	0	0	0	0	0
mmu_circ_001284	chr1_21828798_21830975_R	circRNA	Yes	chr1	21828798	21830975	-	748	2177	5	0,317,582,1459,2097	230,126,183,129,80	21828798,21829115,21829380,21830257,21830895	21829028,21829241,21829563,21830386,21830975	ENSMMUT00000047529	chr1:21826854-21828798|chr1:21830975-21832538	0	0	1	0	0	0	0	1	0	0	0	0	0	0	0	0	0	2	0	0	0	0	0	0	0	0	0	0	0	0.993085	0	0	1.41057
mmu_circ_001285	chr1_21832538_21833696_R	circRNA	Yes	chr1	21832538	21833696	-	419	1158	2	0,875	136,283	21832538,21833413	21832674,21833696	ENSMMUT00000047529	chr1:21830975-21832538|chr1:21833696-21835000	0	0	0	0	0	0	2	0	1	0	0	0	0	0	2	0	0	2	1	0	1	0	0	0	0.613597	0	1.98065	0	0	0	0	0	1.41057
mmu_circ_001291	chr1_219578945_219594751_R	circRNA	Yes	chr1	219578945	219594751	-	416	15806	3	0,13488,15622	96,136,184	219578945,219592433,219594567	219579041,219592569,219594751	PREDICTED.4277.4	chr1:219556707-219578945|chr1:219594751-219604220	0	0	0	0	0	0	0	0	0	0	0	0	0	0	2	0	0	0	0	0	0	0	0	0	0	0	0	0	0	0	0	0	0
mmu_circ_001299	chr1_220209081_220211881_R	circRNA	Yes	chr1	220209081	220211881	-	231	2800	3	0,1486,2699	68,62,101	220209081,220210567,220211780	220209149,220210629,220211881	PREDICTED.5761.5	chr1:220206694-220209081|chr1:220211881-220220312	1	2	0	0	0	0	2	0	1	0	0	0	0	0	1	0	3	0	0	0	0	0	0	1	0	1.04496	1.98065	0	3.10345	0	0	0.401374	0
mmu_circ_001302	chr1_220273966_220278722_R	circRNA	Yes	chr1	220273966	220278722	-	645	4756	4	0,1064,2164,4573	147,180,135,183	220273966,220275030,220276130,220278539	220274113,220275210,220276265,220278722	PREDICTED.5681.1	chr1:220270606-220273966|chr1:220278722-220280902	0	0	0	0	0	0	0	1	0	0	0	0	0	0	1	0	1	0	0	0	0	0	0	0	0	0	0	0	0	0	0	0	0
mmu_circ_001305	chr1_220278539_220287965_R	circRNA	Yes*	chr1	220278539	220287965	-	732	9426	5	0,2363,3856,7550,9278	183,141,109,151,148	220278539,220280902,220282395,220286089,220287817	220278722,220281043,220282504,220286240,220287965	PREDICTED.5681.1	chr1:220276265-220278539|chr1:220287965-220290819	0	0	0	0	0	0	0	0	0	0	0	0	0	0	0	0	0	1	0	0	0	0	0	0	0	0	0	0	0	0	0	0	0.705287
mmu_circ_001310	chr1_220299167_220304492_R	circRNA	Yes	chr1	220299167	220304492	-	249	5325	3	0,3487,5237	82,79,88	220299167,220302654,220304404	220299249,220302733,220304492	PREDICTED.5681.1	chr1:220294729-220299167|chr1:220304492-220310186	1	0	0	0	0	0	1	0	1	1	0	0	1	0	0	0	1	0	0	0	0	0	0	0	0	1.04496	0.990325	0.688568	0	0	0	0	0
mmu_circ_001312	chr1_220299167_220311488_R	circRNA	Yes*	chr1	220299167	220311488	-	456	12321	5	0,3487,5237,11019,12201	82,79,88,87,120	220299167,220302654,220304404,220310186,220311368	220299249,220302733,220304492,220310273,220311488	PREDICTED.5681.1	chr1:220294729-220299167|chr1:220311488-220312414	0	0	0	0	0	0	0	0	1	0	0	0	0	0	0	0	0	0	0	0	0	0	0	0	0	0	0	0	0	0	0	0	0
mmu_circ_001313	chr1_220310186_220312529_R	circRNA	Yes	chr1	220310186	220312529	-	322	2343	3	0,1182,2228	87,120,115	220310186,220311368,220312414	220310273,220311488,220312529	PREDICTED.5681.1	chr1:220304492-220310186|chr1:220312529-220342147	7	2	0	0	1	2	5	0	0	1	0	2	0	0	2	0	3	4	0	0	4	0	0	0	0	7.31469	4.95162	0	3.10345	0	0	0	2.82115
mmu_circ_001319	chr1_220983249_220987316_F	circRNA	Yes	chr1	220983249	220987316	+	402	4067	3	0,264,3826	150,11,241	220983249,220983513,220987075	220983399,220983524,220987316	PREDICTED.3625.1	chr1:220979635-220983249|chr1:220987316-220990023	0	0	0	1	0	0	0	0	0	0	0	0	0	2	0	0	0	0	0	0	0	0	0	0	0	0	0	0	0	0	0	0	0
mmu_circ_001321	chr1_221184444_221187906_F	circRNA	Yes	chr1	221184444	221187906	+	289	3462	2	0,3263	90,199	221184444,221187707	221184534,221187906	ENSMMUT00000017849	chr1:221132531-221184444|chr1:221187906-221204594	2	0	0	0	0	0	0	1	0	0	0	0	0	0	0	0	1	2	0	0	0	0	0	0	0	2.08991	0	0	0	0	0	0	1.41057
mmu_circ_001322	chr1_221522220_221540105_F	circRNA	Yes	chr1	221522220	221540105	+	401	17885	3	0,4486,17774	194,96,111	221522220,221526706,221539994	221522414,221526802,221540105	PREDICTED.7073.2	chr1:221517568-221522220|chr1:221540105-221545823	1	0	0	3	0	1	0	1	0	0	0	0	1	0	3	0	2	0	0	0	2	0	0	0	0	1.04496	0	0.688568	0	0	0	0	0
mmu_circ_001324	chr1_221526706_221540105_F	circRNA	Yes	chr1	221526706	221540105	+	207	13399	2	0,13288	96,111	221526706,221539994	221526802,221540105	PREDICTED.7073.2	chr1:221522414-221526706|chr1:221540105-221545823	1	0	0	0	0	0	0	0	0	0	0	0	0	0	0	0	0	1	1	0	0	0	0	0	0.613597	1.04496	0	0	0	0	0	0	0.705287
mmu_circ_001325	chr1_221526706_221545902_F	circRNA	Yes	chr1	221526706	221545902	+	286	19196	3	0,13288,19117	96,111,79	221526706,221539994,221545823	221526802,221540105,221545902	PREDICTED.5779.2	chr1:221522414-221526706|chr1:221545902-221552975	0	0	0	0	2	0	4	0	2	0	0	0	1	0	8	2	2	3	0	0	0	0	0	0	0	0	3.9613	0.688568	0	0	0	0	2.11586
mmu_circ_001326	chr1_221539994_221545902_F	circRNA	Yes	chr1	221539994	221545902	+	190	5908	2	0,5829	111,79	221539994,221545823	221540105,221545902	PREDICTED.5779.2	chr1:221526802-221539994|chr1:221545902-221552975	0	0	4	0	7	2	10	0	4	0	0	0	9	0	17	3	0	3	0	0	9	3	0	0	0	0	9.90325	6.19711	0	3.97234	1.2917	0	2.11586
mmu_circ_001327	chr1_221539994_221553159_F	circRNA	Yes	chr1	221539994	221553159	+	374	13165	3	0,5829,12981	111,79,184	221539994,221545823,221552975	221540105,221545902,221553159	PREDICTED.3532.2	chr1:221526802-221539994|chr1:221553159-221556089	0	0	0	0	0	0	0	0	0	0	0	0	0	0	1	1	1	0	0	0	0	0	0	0	0	0	0	0	0	0	0	0	0
mmu_circ_001329	chr1_221568837_221572971_R	circRNA	Yes	chr1	221568837	221572971	-	283	4134	3	0,1039,3980	60,69,154	221568837,221569876,221572817	221568897,221569945,221572971	ENSMMUT00000011780	chr1:221563450-221568837|chr1:221572971-221574271	1	0	1	0	0	0	0	3	0	0	0	0	2	0	2	0	1	0	0	0	0	0	0	0	0	1.04496	0	1.37714	0	0.993085	0	0	0
mmu_circ_001330	chr1_221568837_221574424_R	circRNA	Yes	chr1	221568837	221574424	-	436	5587	4	0,1039,3980,5434	60,69,154,153	221568837,221569876,221572817,221574271	221568897,221569945,221572971,221574424	ENSMMUT00000011780	chr1:221563450-221568837|chr1:221574424-221575114	0	0	0	2	0	0	2	0	0	1	0	0	0	1	0	0	0	0	0	1	0	0	0	0	0	0	1.98065	0	0	0	0	0	0
mmu_circ_001332	chr1_221572817_221574424_R	circRNA	Yes	chr1	221572817	221574424	-	307	1607	2	0,1454	154,153	221572817,221574271	221572971,221574424	ENSMMUT00000011780	chr1:221569945-221572817|chr1:221574424-221575114	8	0	0	0	2	0	2	2	0	0	0	1	0	0	3	2	0	0	2	0	2	0	1	0	1.22719	8.35964	1.98065	0	0	0	0	0	0
mmu_circ_001333	chr1_221572817_221574424_R	circRNA	Yes	chr1	221572817	221574424	-	588	1607	3	0,711,1454	154,281,153	221572817,221573528,221574271	221572971,221573809,221574424	PREDICTED.4871.1	chr1:221569945-221572817|chr1:221574424-221575114	0	0	0	0	0	0	0	0	0	0	0	0	3	0	0	0	0	0	0	0	0	0	0	0	0	0	0	2.0657	0	0	0	0	0
mmu_circ_001335	chr1_221574271_221575981_R	circRNA	Yes	chr1	221574271	221575981	-	379	1710	4	0,843,1005,1614	153,65,65,96	221574271,221575114,221575276,221575885	221574424,221575179,221575341,221575981	ENSMMUT00000011780	chr1:221572971-221574271|chr1:221575981-221577427	0	0	0	1	0	0	0	1	0	0	0	1	0	0	1	0	0	0	0	0	0	0	0	0	0	0	0	0	0	0	0	0	0
mmu_circ_001338	chr1_221580626_221590379_R	circRNA	Yes	chr1	221580626	221590379	-	289	9753	3	0,2037,9664	100,100,89	221580626,221582663,221590290	221580726,221582763,221590379	PREDICTED.3556.1	chr1:221577504-221580626|chr1:221590379-221595579	0	0	0	1	0	0	0	0	0	0	0	0	0	0	0	0	0	0	1	0	0	0	0	0	0.613597	0	0	0	0	0	0	0	0
mmu_circ_001342	chr1_222552879_222559924_F	circRNA	Yes	chr1	222552879	222559924	+	370	7045	4	0,1531,5053,6992	98,70,149,53	222552879,222554410,222557932,222559871	222552977,222554480,222558081,222559924	PREDICTED.3653.2	chr1:222547379-222552879|chr1:222559924-222561578	0	0	0	3	0	0	0	0	0	0	0	0	0	0	0	0	0	0	0	0	0	0	0	0	0	0	0	0	0	0	0	0	0
mmu_circ_001345	chr1_222552879_222575022_F	circRNA	Yes	chr1	222552879	222575022	+	930	22143	9	0,1531,5053,6992,8699,12105,13182,14704,22004	98,70,149,53,98,136,97,90,139	222552879,222554410,222557932,222559871,222561578,222564984,222566061,222567583,222574883	222552977,222554480,222558081,222559924,222561676,222565120,222566158,222567673,222575022	ENSMMUT00000030535	chr1:222547379-222552879|chr1:222575022-222576867	1	0	0	0	0	0	1	2	0	0	0	0	1	0	2	0	0	0	0	0	0	0	0	0	0	1.04496	0.990325	0.688568	0	0	0	0	0
mmu_circ_001350	chr1_222561578_222575022_F	circRNA	Yes	chr1	222561578	222575022	+	560	13444	5	0,3406,4483,6005,13305	98,136,97,90,139	222561578,222564984,222566061,222567583,222574883	222561676,222565120,222566158,222567673,222575022	PREDICTED.5457.1	chr1:222558081-222561578|chr1:222575022-222576867	0	0	0	0	0	0	0	0	0	0	0	0	0	0	0	0	0	2	0	0	1	0	0	0	0	0	0	0	0	0	0	0	1.41057
mmu_circ_001352	chr1_222574883_222578869_F	circRNA	Yes	chr1	222574883	222578869	+	412	3986	3	0,1984,3813	139,100,173	222574883,222576867,222578696	222575022,222576967,222578869	ENSMMUT00000030535	chr1:222567673-222574883|chr1:222578869-222585698	1	0	0	0	0	0	0	0	0	0	0	0	0	0	0	0	0	0	1	0	0	0	1	0	0.613597	1.04496	0	0	0	0	0	0	0
mmu_circ_001353	chr1_222576867_222604921_F	circRNA	Yes	chr1	222576867	222604921	+	1844	28054	12	0,1829,8831,12585,15879,16499,16851,18435,18813,20403,25361,27904	100,173,98,162,215,262,189,191,72,121,111,150	222576867,222578696,222585698,222589452,222592746,222593366,222593718,222595302,222595680,222597270,222602228,222604771	222576967,222578869,222585796,222589614,222592961,222593628,222593907,222595493,222595752,222597391,222602339,222604921	ENSMMUT00000030535	chr1:222575022-222576867|chr1:222604921-222612520	0	0	0	0	0	0	0	0	0	0	0	0	1	0	1	0	0	0	0	0	0	0	0	0	0	0	0	0.688568	0	0	0	0	0
mmu_circ_001354	chr1_222589452_222604921_F	circRNA	Yes	chr1	222589452	222604921	+	1473	15469	9	0,3294,3914,4266,5850,6228,7818,12776,15319	162,215,262,189,191,72,121,111,150	222589452,222592746,222593366,222593718,222595302,222595680,222597270,222602228,222604771	222589614,222592961,222593628,222593907,222595493,222595752,222597391,222602339,222604921	ENSMMUT00000030535	chr1:222585796-222589452|chr1:222604921-222612520	0	0	0	0	0	0	0	3	0	0	0	0	1	0	0	0	0	0	0	0	0	0	0	0	0	0	0	0.688568	0	0	0	0	0
mmu_circ_001357	chr1_223930831_223933830_F	circRNA	Yes	chr1	223930831	223933830	+	275	2999	2	0,2783	59,216	223930831,223933614	223930890,223933830	ENSMMUT00000017688	chr1:223899938-223930831|chr1:223933830-223962085	0	0	0	0	0	0	0	0	0	0	0	1	0	0	1	0	0	0	0	0	0	0	0	0	0	0	0	0	0	0	0	0	0
mmu_circ_001358	chr1_224480878_224483661_F	circRNA	Yes	chr1	224480878	224483661	+	323	2783	2	0,2594	134,189	224480878,224483472	224481012,224483661	PREDICTED.5464.1	chr1:224461736-224480878|chr1:224483661-224490519	0	0	0	0	1	0	0	0	0	0	0	0	0	0	0	0	1	0	0	0	0	0	0	0	0	0	0	0	0	0	0	0	0
mmu_circ_001359	chr1_224948196_224948473_R	circRNA	Yes	chr1	224948196	224948473	-	277	277	1	0	277	224948196	224948473	ENSMMUT00000018405	chr1:224930764-224948196|chr1:224948473-224994873	0	0	0	0	0	0	1	0	0	0	0	0	0	0	0	0	2	0	0	0	0	0	0	0	0	0	0.990325	0	0	0	0	0	0
mmu_circ_001360	chr1_225124847_225148481_R	circRNA	Yes	chr1	225124847	225148481	-	347	23634	3	0,18317,23579	189,103,55	225124847,225143164,225148426	225125036,225143267,225148481	ENSMMUT00000018405	chr1:224994934-225124847|chr1:225148481-225168766	0	0	0	0	0	0	0	0	0	0	1	0	0	1	0	0	1	0	0	0	0	0	0	0	0	0	0	0	0	0	0	0	0
mmu_circ_001361	chr1_225405827_225411196_R	circRNA	Yes	chr1	225405827	225411196	-	246	5369	2	0,5254	131,115	225405827,225411081	225405958,225411196	ENSMMUT00000022764	chr1:225385822-225405827|chr1:225411196-225418660	0	0	0	0	3	0	0	1	0	1	0	0	0	1	3	2	2	1	0	0	0	0	0	0	0	0	0	0	0	0	0	0	0.705287
mmu_circ_001362	chr1_225580974_225584480_F	circRNA	Yes	chr1	225580974	225584480	+	257	3506	2	0,3369	120,137	225580974,225584343	225581094,225584480	PREDICTED.5567.1	chr1:225534735-225580974|chr1:225584480-225587456	1	0	1	0	0	0	0	0	0	0	0	0	1	0	0	0	0	0	0	0	0	0	0	0	0	1.04496	0	0.688568	0	0.993085	0	0	0
mmu_circ_001364	chr1_225997759_226004691_F	circRNA	Yes	chr1	225997759	226004691	+	242	6932	3	0,2944,6861	95,76,71	225997759,226000703,226004620	225997854,226000779,226004691	ENSMMUT00000008242	chr1:225978993-225997759|chr1:226004691-226014215	2	0	0	7	0	0	2	5	3	2	0	0	0	9	2	2	9	2	0	0	0	0	2	0	0	2.08991	1.98065	0	0	0	0	0	1.41057
mmu_circ_001365	chr1_225997759_226004691_F	circRNA	Yes	chr1	225997759	226004691	+	305	6932	4	0,2944,5081,6861	95,76,63,71	225997759,226000703,226002840,226004620	225997854,226000779,226002903,226004691	PREDICTED.4962.2	chr1:225978993-225997759|chr1:226004691-226018725	0	0	0	0	0	0	0	0	0	0	0	0	2	0	0	0	0	0	0	0	0	0	0	0	0	0	0	1.37714	0	0	0	0	0
mmu_circ_001368	chr1_226051478_226051786_F	circRNA	Yes	chr1	226051478	226051786	+	159	308	2	0,228	79,80	226051478,226051706	226051557,226051786	ENSMMUT00000008242	chr1:226049007-226051478|chr1:226051786-226053550	0	0	0	0	0	0	0	0	0	0	0	0	0	0	1	0	1	0	0	0	0	0	0	0	0	0	0	0	0	0	0	0	0
mmu_circ_001370	chr1_226292550_226304418_R	circRNA	Yes*	chr1	226292550	226304418	-	726	11868	6	0,3454,5592,6342,10440,11787	127,125,180,109,104,81	226292550,226296004,226298142,226298892,226302990,226304337	226292677,226296129,226298322,226299001,226303094,226304418	ENSMMUT00000008227	chr1:226288722-226292550|chr1:226304418-226306688	0	0	0	0	0	0	0	0	0	0	0	0	0	0	0	0	1	0	0	0	0	0	0	0	0	0	0	0	0	0	0	0	0
mmu_circ_001371	chr1_226302990_226304418_R	circRNA	Yes	chr1	226302990	226304418	-	185	1428	2	0,1347	104,81	226302990,226304337	226303094,226304418	ENSMMUT00000008229	chr1:226299001-226302990|chr1:226304418-226306688	4	0	0	4	3	4	5	1	2	0	0	0	3	8	4	0	3	4	1	0	2	1	0	0	0.613597	4.17982	4.95162	2.0657	0	0	0.430566	0	2.82115
mmu_circ_001372	chr1_226302990_226308042_R	circRNA	Yes	chr1	226302990	226308042	-	413	5052	4	0,1347,3698,4890	104,81,66,162	226302990,226304337,226306688,226307880	226303094,226304418,226306754,226308042	ENSMMUT00000008229	chr1:226299001-226302990|chr1:226308042-226324703	0	0	0	0	0	0	1	0	0	0	0	1	0	0	0	0	0	0	0	0	0	1	0	1	0	0	0.990325	0	0	0	0.430566	0.401374	0
mmu_circ_001373	chr1_226306688_226308042_R	circRNA	Yes	chr1	226306688	226308042	-	228	1354	2	0,1192	66,162	226306688,226307880	226306754,226308042	ENSMMUT00000008229	chr1:226304418-226306688|chr1:226308042-226324703	1	0	1	0	2	0	0	0	0	0	2	0	0	0	0	0	1	1	0	1	1	0	0	0	0	1.04496	0	0	0	0.993085	0	0	0.705287
mmu_circ_001374	chr1_226609839_226616222_F	circRNA	Yes	chr1	226609839	226616222	+	563	6383	2	0,6248	428,135	226609839,226616087	226610267,226616222	ENSMMUT00000003237	chr1:226609794-226609839|chr1:226616222-226631766	0	0	1	0	0	0	0	0	0	0	0	0	0	0	0	1	0	0	0	0	1	0	0	0	0	0	0	0	0	0.993085	0	0	0
mmu_circ_001375	chr1_226688512_226710164_R	circRNA	Yes	chr1	226688512	226710164	-	833	21652	8	0,2146,2483,9846,14601,15878,18947,21530	127,84,93,127,104,88,88,122	226688512,226690658,226690995,226698358,226703113,226704390,226707459,226710042	226688639,226690742,226691088,226698485,226703217,226704478,226707547,226710164	PREDICTED.5368.1	chr1:226679537-226688512|chr1:226710164-226716745	0	0	0	0	0	0	0	0	0	1	0	0	1	0	0	0	0	0	0	0	0	0	0	0	0	0	0	0.688568	0	0	0	0	0
mmu_circ_001380	chr1_227411301_227428010_F	circRNA	Yes*	chr1	227411301	227428010	+	985	16709	7	0,1913,3074,10931,12252,15013,16528	135,147,136,96,210,80,181	227411301,227413214,227414375,227422232,227423553,227426314,227427829	227411436,227413361,227414511,227422328,227423763,227426394,227428010	ENSMMUT00000031081	chr1:227405941-227411301|chr1:227428010-227432644	0	0	0	0	0	0	0	0	0	0	0	0	0	0	1	0	0	0	0	0	0	0	0	0	0	0	0	0	0	0	0	0	0
mmu_circ_001382	chr1_227422232_227423763_F	circRNA	Yes	chr1	227422232	227423763	+	306	1531	2	0,1321	96,210	227422232,227423553	227422328,227423763	ENSMMUT00000031081	chr1:227414511-227422232|chr1:227423763-227426314	0	1	0	1	0	1	0	1	0	0	0	0	1	0	1	0	0	0	0	1	0	0	0	0	0	0	0	0.688568	1.55173	0	0	0	0
mmu_circ_001385	chr1_227459319_227495803_F	circRNA	Yes	chr1	227459319	227495803	+	2025	36484	14	0,471,5946,8397,9501,11782,18425,20138,25694,30142,31391,32358,33554,36325	156,71,148,148,158,92,164,95,225,123,100,252,134,159	227459319,227459790,227465265,227467716,227468820,227471101,227477744,227479457,227485013,227489461,227490710,227491677,227492873,227495644	227459475,227459861,227465413,227467864,227468978,227471193,227477908,227479552,227485238,227489584,227490810,227491929,227493007,227495803	ENSMMUT00000031079	chr1:227457276-227459319|chr1:227495803-227498557	1	0	0	0	0	0	2	0	0	0	0	0	0	0	0	0	0	0	0	0	0	0	0	0	0	1.04496	1.98065	0	0	0	0	0	0
mmu_circ_001388	chr1_227479457_227495803_F	circRNA	Yes	chr1	227479457	227495803	+	1088	16346	7	0,5556,10004,11253,12220,13416,16187	95,225,123,100,252,134,159	227479457,227485013,227489461,227490710,227491677,227492873,227495644	227479552,227485238,227489584,227490810,227491929,227493007,227495803	PREDICTED.4108.1	chr1:227477908-227479457|chr1:227495803-227498557	0	0	0	3	1	0	0	0	0	0	0	0	0	0	0	0	0	0	0	0	0	0	0	0	0	0	0	0	0	0	0	0	0
mmu_circ_001390	chr1_227485013_227485238_F	circRNA	Yes	chr1	227485013	227485238	+	225	225	1	0	225	227485013	227485238	PREDICTED.3754.3	chr1:227479552-227485013|chr1:227485238-227489461	0	0	0	0	0	0	0	0	0	0	0	0	0	0	2	0	0	0	0	0	0	0	0	0	0	0	0	0	0	0	0	0	0
mmu_circ_001393	chr1_227492873_227495803_F	circRNA	Yes	chr1	227492873	227495803	+	293	2930	2	0,2771	134,159	227492873,227495644	227493007,227495803	ENSMMUT00000031079	chr1:227491929-227492873|chr1:227495803-227498557	2	0	0	1	1	0	1	0	0	0	0	0	0	0	0	2	0	0	0	0	1	0	0	0	0	2.08991	0.990325	0	0	0	0	0	0
mmu_circ_001395	chr1_227506462_227512386_F	circRNA	Yes	chr1	227506462	227512386	+	235	5924	3	0,1376,5835	81,65,89	227506462,227507838,227512297	227506543,227507903,227512386	ENSMMUT00000031079	chr1:227504376-227506462|chr1:227512386-227515962	0	0	0	0	1	0	0	0	1	0	0	0	0	0	0	0	0	0	0	0	0	0	0	0	0	0	0	0	0	0	0	0	0
mmu_circ_001396	chr1_227526203_227526395_F	circRNA	Yes	chr1	227526203	227526395	+	192	192	1	0	192	227526203	227526395	ENSMMUT00000031076	chr1:227526119-227526203|chr1:227526395-227526486	0	0	0	0	1	0	0	0	0	0	0	0	0	1	0	0	0	0	0	0	0	0	0	0	0	0	0	0	0	0	0	0	0
mmu_circ_001397	chr1_227526203_227526668_F	circRNA	Yes	chr1	227526203	227526668	+	374	465	2	0,283	192,182	227526203,227526486	227526395,227526668	ENSMMUT00000031076	chr1:227526119-227526203|chr1:227526668-227526746	3	1	2	0	1	0	4	0	3	0	0	0	2	1	3	1	0	2	0	0	3	0	0	0	0	3.13487	3.9613	1.37714	1.55173	1.98617	0	0	1.41057
mmu_circ_001398	chr1_227526486_227526668_F	circRNA	Yes	chr1	227526486	227526668	+	182	182	1	0	182	227526486	227526668	ENSMMUT00000031076	chr1:227526395-227526486|chr1:227526668-227526746	0	0	0	1	0	0	0	1	0	0	0	0	0	0	0	0	0	0	0	0	0	0	0	0	0	0	0	0	0	0	0	0	0
mmu_circ_001402	chr1_23412387_23414462_R	circRNA	Yes	chr1	23412387	23414462	-	226	2075	2	0,1963	114,112	23412387,23414350	23412501,23414462	ENSMMUT00000047511	chr1:23411310-23412387|chr1:23414462-23416564	0	0	0	0	0	0	0	0	0	0	0	1	0	0	0	1	0	0	0	0	0	0	0	0	0	0	0	0	0	0	0	0	0
mmu_circ_001403	chr1_23412387_23416724_R	circRNA	Yes*	chr1	23412387	23416724	-	386	4337	3	0,1963,4177	114,112,160	23412387,23414350,23416564	23412501,23414462,23416724	ENSMMUT00000047511	chr1:23411310-23412387|chr1:23416724-23423934	0	0	0	0	0	0	0	0	0	0	0	0	0	0	1	0	0	0	0	0	0	0	0	0	0	0	0	0	0	0	0	0	0
mmu_circ_001406	chr1_23416564_23416724_R	circRNA	Yes	chr1	23416564	23416724	-	160	160	1	0	160	23416564	23416724	ENSMMUT00000047511	chr1:23414462-23416564|chr1:23416724-23423934	1	0	0	0	2	0	0	0	0	0	0	0	0	0	0	0	0	0	0	0	1	0	0	0	0	1.04496	0	0	0	0	0	0	0
mmu_circ_001407	chr1_23416564_23416817_R	circRNA	Yes	chr1	23416564	23416817	-	253	253	1	0	253	23416564	23416817	PREDICTED.605.2	chr1:23414462-23416564|chr1:23416817-23423934	0	0	0	0	0	0	0	0	0	0	0	0	0	0	0	0	5	0	0	0	0	0	0	0	0	0	0	0	0	0	0	0	0
mmu_circ_001410	chr1_23423934_23442356_R	circRNA	Yes	chr1	23423934	23442356	-	631	18422	5	0,9917,12084,15390,18262	91,155,81,144,160	23423934,23433851,23436018,23439324,23442196	23424025,23434006,23436099,23439468,23442356	ENSMMUT00000047511	chr1:23416724-23423934|chr1:23442356-23445456	0	0	0	0	2	1	0	0	0	0	1	0	1	0	0	1	0	0	0	0	0	0	0	0	0	0	0	0.688568	0	0	0	0	0
mmu_circ_001411	chr1_23423934_23442356_R	circRNA	Yes	chr1	23423934	23442356	-	637	18422	6	0,9917,12084,15390,18150,18258	91,155,81,144,2,164	23423934,23433851,23436018,23439324,23442084,23442192	23424025,23434006,23436099,23439468,23442086,23442356	PREDICTED.735.3	chr1:23416724-23423934|chr1:23442356-23445456	0	0	0	0	0	0	1	0	0	0	0	0	0	0	0	0	2	0	0	0	0	0	0	0	0	0	0.990325	0	0	0	0	0	0
mmu_circ_001412	chr1_23423934_23445610_R	circRNA	Yes	chr1	23423934	23445610	-	785	21676	6	0,9917,12084,15390,18262,21522	91,155,81,144,160,154	23423934,23433851,23436018,23439324,23442196,23445456	23424025,23434006,23436099,23439468,23442356,23445610	ENSMMUT00000047511	chr1:23416724-23423934|chr1:23445610-23448940	0	0	1	0	0	0	0	0	0	1	0	0	0	0	1	0	0	0	0	0	0	0	0	0	0	0	0	0	0	0.993085	0	0	0
mmu_circ_001413	chr1_23433851_23442356_R	circRNA	Yes	chr1	23433851	23442356	-	540	8505	4	0,2167,5473,8345	155,81,144,160	23433851,23436018,23439324,23442196	23434006,23436099,23439468,23442356	ENSMMUT00000047511	chr1:23424025-23433851|chr1:23442356-23445456	0	0	0	1	1	1	0	0	0	0	0	1	0	0	0	1	0	2	1	0	1	0	0	0	0.613597	0	0	0	0	0	0	0	1.41057
mmu_circ_001414	chr1_23433851_23442356_R	circRNA	Yes	chr1	23433851	23442356	-	546	8505	5	0,2167,5473,8233,8341	155,81,144,2,164	23433851,23436018,23439324,23442084,23442192	23434006,23436099,23439468,23442086,23442356	PREDICTED.735.3	chr1:23424025-23433851|chr1:23442356-23445456	2	0	0	0	0	0	2	0	0	0	0	0	0	0	0	0	2	0	0	0	0	0	0	0	0	2.08991	1.98065	0	0	0	0	0	0
mmu_circ_001415	chr1_23436018_23445610_R	circRNA	Yes*	chr1	23436018	23445610	-	545	9592	5	0,3306,6066,6174,9438	81,144,2,164,154	23436018,23439324,23442084,23442192,23445456	23436099,23439468,23442086,23442356,23445610	PREDICTED.735.3	chr1:23434006-23436018|chr1:23445610-23448940	1	0	0	0	0	0	0	0	0	0	0	0	0	0	0	0	0	0	0	0	0	0	0	0	0	1.04496	0	0	0	0	0	0	0
mmu_circ_001416	chr1_23439324_23442356_R	circRNA	Yes	chr1	23439324	23442356	-	304	3032	2	0,2872	144,160	23439324,23442196	23439468,23442356	ENSMMUT00000047511	chr1:23436099-23439324|chr1:23442356-23445456	0	0	0	0	0	0	0	2	1	0	0	0	1	0	0	1	0	0	0	0	1	0	0	0	0	0	0	0.688568	0	0	0	0	0
mmu_circ_001417	chr1_23439324_23445610_R	circRNA	Yes	chr1	23439324	23445610	-	458	6286	3	0,2872,6132	144,160,154	23439324,23442196,23445456	23439468,23442356,23445610	ENSMMUT00000047511	chr1:23436099-23439324|chr1:23445610-23448940	0	0	0	1	0	0	0	0	0	0	0	0	0	0	2	0	0	0	0	0	0	0	0	0	0	0	0	0	0	0	0	0	0
mmu_circ_001420	chr1_23601278_23602118_R	circRNA	Yes	chr1	23601278	23602118	-	840	840	1	0	840	23601278	23602118	PREDICTED.525.2	chr1:23565710-23601278|chr1:23602118-23609991	0	0	0	1	0	0	0	2	0	0	0	0	0	0	0	0	0	0	0	0	0	0	0	0	0	0	0	0	0	0	0	0	0
mmu_circ_001421	chr1_23601278_23610100_R	circRNA	Yes	chr1	23601278	23610100	-	949	8822	2	0,8713	840,109	23601278,23609991	23602118,23610100	ENSMMUT00000013999	chr1:23601183-23601278|chr1:23610100-23631000	1	0	0	1	0	0	0	0	0	0	0	0	2	0	0	2	1	1	0	0	0	0	0	0	0	1.04496	0	1.37714	0	0	0	0	0.705287
mmu_circ_001424	chr1_23601278_23634638_R	circRNA	Yes	chr1	23601278	23634638	-	1170	33360	4	0,8713,29722,33262	840,109,123,98	23601278,23609991,23631000,23634540	23602118,23610100,23631123,23634638	PREDICTED.686.3	chr1:23565710-23601278|chr1:23634638-23642198	0	0	0	0	0	0	0	0	0	0	0	0	0	0	1	1	1	0	0	0	1	0	0	0	0	0	0	0	0	0	0	0	0
mmu_circ_001425	chr1_23631000_23634638_R	circRNA	Yes	chr1	23631000	23634638	-	221	3638	2	0,3540	123,98	23631000,23634540	23631123,23634638	ENSMMUT00000013999	chr1:23610100-23631000|chr1:23634638-23642198	0	0	0	0	0	0	1	0	0	0	0	0	0	2	1	0	0	0	0	0	0	0	0	0	0	0	0.990325	0	0	0	0	0	0
mmu_circ_001426	chr1_23631000_23642313_R	circRNA	Yes	chr1	23631000	23642313	-	336	11313	3	0,3540,11198	123,98,115	23631000,23634540,23642198	23631123,23634638,23642313	PREDICTED.434.1	chr1:23610100-23631000|chr1:23642313-23642919	0	1	0	0	0	0	0	0	0	1	0	0	0	0	0	0	0	0	0	0	0	0	0	0	0	0	0	0	1.55173	0	0	0	0
mmu_circ_001427	chr1_23631000_23643099_R	circRNA	Yes	chr1	23631000	23643099	-	516	12099	4	0,3540,11198,11919	123,98,115,180	23631000,23634540,23642198,23642919	23631123,23634638,23642313,23643099	ENSMMUT00000013999	chr1:23610100-23631000|chr1:23643099-23659120	4	0	0	1	0	2	0	0	0	0	1	0	0	0	1	0	3	1	0	0	0	0	0	0	0	4.17982	0	0	0	0	0	0	0.705287
mmu_circ_001429	chr1_23892793_23893695_R	circRNA	Yes	chr1	23892793	23893695	-	179	902	2	0,791	68,111	23892793,23893584	23892861,23893695	ENSMMUT00000015315	chr1:23890758-23892793|chr1:23893695-23902503	1	0	2	0	0	0	0	0	0	0	0	0	0	1	0	0	0	0	0	0	0	0	0	0	0	1.04496	0	0	0	1.98617	0	0	0
mmu_circ_001432	chr1_24300816_24309306_R	circRNA	Yes	chr1	24300816	24309306	-	368	8490	3	0,6361,8383	156,105,107	24300816,24307177,24309199	24300972,24307282,24309306	ENSMMUT00000024395	chr1:24295718-24300816|chr1:24309306-24309928	0	0	0	0	0	0	0	0	0	0	0	0	0	0	1	0	0	1	0	0	0	0	0	0	0	0	0	0	0	0	0	0	0.705287
mmu_circ_001433	chr1_24307177_24309306_R	circRNA	Yes	chr1	24307177	24309306	-	212	2129	2	0,2022	105,107	24307177,24309199	24307282,24309306	ENSMMUT00000047507	chr1:24295718-24307177|chr1:24309306-24309928	3	0	0	0	1	0	2	0	0	0	0	0	1	0	2	1	1	1	0	0	0	0	0	0	0	3.13487	1.98065	0.688568	0	0	0	0	0.705287
mmu_circ_001434	chr1_24307177_24312535_R	circRNA	Yes	chr1	24307177	24312535	-	764	5358	7	0,2022,2751,4217,4616,4957,5233	105,107,131,111,62,123,125	24307177,24309199,24309928,24311394,24311793,24312134,24312410	24307282,24309306,24310059,24311505,24311855,24312257,24312535	ENSMMUT00000047507	chr1:24295718-24307177|chr1:24312535-24320909	1	0	0	1	0	0	0	0	1	0	0	0	0	0	0	0	0	0	0	0	0	0	0	0	0	1.04496	0	0	0	0	0	0	0
mmu_circ_001435	chr1_24307177_24329088_R	circRNA	Yes	chr1	24307177	24329088	-	1280	21911	12	0,2022,2751,4217,4616,4957,5233,13732,18632,19402,19479,21713	105,107,131,111,62,123,125,69,78,35,136,198	24307177,24309199,24309928,24311394,24311793,24312134,24312410,24320909,24325809,24326579,24326656,24328890	24307282,24309306,24310059,24311505,24311855,24312257,24312535,24320978,24325887,24326614,24326792,24329088	PREDICTED.834.3	chr1:24300972-24307177|chr1:24329088-24333595	0	0	0	0	0	0	0	0	0	0	0	0	0	0	0	0	2	0	0	0	0	0	0	0	0	0	0	0	0	0	0	0	0
mmu_circ_001439	chr1_24309928_24326792_R	circRNA	Yes*	chr1	24309928	24326792	-	870	16864	9	0,1466,1865,2206,2482,10981,15881,16659,16745	131,111,62,123,125,69,78,52,119	24309928,24311394,24311793,24312134,24312410,24320909,24325809,24326587,24326673	24310059,24311505,24311855,24312257,24312535,24320978,24325887,24326639,24326792	PREDICTED.456.2	chr1:24309306-24309928|chr1:24326792-24328890	0	0	0	0	0	0	0	0	0	0	0	0	0	0	0	0	0	0	0	1	0	0	0	0	0	0	0	0	0	0	0	0	0
mmu_circ_001440	chr1_24320909_24326792_R	circRNA	Yes	chr1	24320909	24326792	-	318	5883	4	0,4900,5670,5747	69,78,35,136	24320909,24325809,24326579,24326656	24320978,24325887,24326614,24326792	ENSMMUT00000024395	chr1:24312535-24320909|chr1:24326792-24328890	0	1	0	0	3	0	0	2	0	0	0	0	0	0	7	1	7	0	4	0	0	0	0	0	2.45439	0	0	0	1.55173	0	0	0	0
mmu_circ_001441	chr1_24320909_24326792_R	circRNA	Yes	chr1	24320909	24326792	-	318	5883	4	0,4900,5678,5764	69,78,52,119	24320909,24325809,24326587,24326673	24320978,24325887,24326639,24326792	ENSMMUT00000047507	chr1:24312535-24320909|chr1:24326792-24328890	3	0	3	0	0	0	0	0	0	0	1	0	0	0	0	0	0	3	0	1	0	0	0	0	0	3.13487	0	0	0	2.97926	0	0	2.11586
mmu_circ_001443	chr1_24325809_24326792_R	circRNA	Yes	chr1	24325809	24326792	-	249	983	3	0,778,864	78,52,119	24325809,24326587,24326673	24325887,24326639,24326792	PREDICTED.456.2	chr1:24320978-24325809|chr1:24326792-24328890	0	0	0	0	0	0	0	0	1	0	0	1	0	0	0	0	0	0	0	1	0	0	0	0	0	0	0	0	0	0	0	0	0
mmu_circ_001444	chr1_24351901_24355340_R	circRNA	Yes	chr1	24351901	24355340	-	243	3439	2	0,3330	134,109	24351901,24355231	24352035,24355340	ENSMMUT00000024398	chr1:24350595-24351901|chr1:24355340-24356255	2	0	0	1	1	0	0	0	0	0	0	0	0	1	1	0	0	2	0	0	0	0	0	0	0	2.08991	0	0	0	0	0	0	1.41057
mmu_circ_001445	chr1_24351901_24356852_R	circRNA	Yes*	chr1	24351901	24356852	-	496	4951	4	0,3330,4354,4823	134,109,125,128	24351901,24355231,24356255,24356724	24352035,24355340,24356380,24356852	ENSMMUT00000024398	chr1:24350595-24351901|chr1:24356852-24360199	0	0	0	1	0	0	0	0	0	0	0	0	0	0	0	0	0	0	0	0	0	0	0	0	0	0	0	0	0	0	0	0	0
mmu_circ_001446	chr1_24355231_24361436_R	circRNA	Yes	chr1	24355231	24361436	-	640	6205	5	0,1024,1493,4968,6084	109,125,128,157,121	24355231,24356255,24356724,24360199,24361315	24355340,24356380,24356852,24360356,24361436	PREDICTED.811.3	chr1:24352035-24355231|chr1:24361436-24390075	1	0	0	0	0	0	0	0	0	0	0	0	0	0	0	0	0	0	0	0	1	0	0	0	0	1.04496	0	0	0	0	0	0	0
mmu_circ_001447	chr1_24449721_24449904_R	ciRNA	Yes*	chr1	24449721	24449904	-	183	183	1	0	183	24449721	24449904	PREDICTED.1565.2	chr1:24449703-24449904	0	0	0	0	0	0	0	0	0	0	0	0	0	0	0	1	0	0	0	0	0	0	0	0	0	0	0	0	0	0	0	0	0
mmu_circ_001448	chr1_24455157_24456344_R	circRNA	Yes	chr1	24455157	24456344	-	637	1187	3	0,541,991	261,180,196	24455157,24455698,24456148	24455418,24455878,24456344	PREDICTED.1085.2	chr1:24453342-24455157|chr1:24456344-24457694	0	1	0	0	0	0	0	0	0	0	0	0	0	0	0	0	0	0	1	0	0	0	0	0	0.613597	0	0	0	1.55173	0	0	0	0
mmu_circ_001449	chr1_24464233_24464383_R	ciRNA	Yes	chr1	24464233	24464383	-	150	150	1	0	150	24464233	24464383	ENSMMUT00000047505	chr1:24464207-24464383	0	0	0	0	0	0	0	2	1	0	0	1	0	0	0	0	0	0	0	0	0	0	0	0	0	0	0	0	0	0	0	0	0
mmu_circ_001450	chr1_24464239_24464383_R	ciRNA	Yes	chr1	24464239	24464383	-	144	144	1	0	144	24464239	24464383	ENSMMUT00000047505	chr1:24464207-24464383	11	8	9	18	28	4	21	31	17	0	2	4	3	17	24	7	20	15	4	4	5	1	4	0	2.45439	11.4945	20.7968	2.0657	12.4138	8.93777	0.430566	0	10.5793
mmu_circ_001451	chr1_24464240_24464383_R	ciRNA	Yes	chr1	24464240	24464383	-	143	143	1	0	143	24464240	24464383	ENSMMUT00000047505	chr1:24464207-24464383	20	11	10	10	12	3	29	23	23	0	7	11	7	13	15	6	24	23	8	4	8	0	5	3	4.90878	20.8991	28.7194	4.81997	17.069	9.93085	0	1.20412	16.2216
mmu_circ_001453	chr1_24464242_24464383_R	ciRNA	Yes	chr1	24464242	24464383	-	141	141	1	0	141	24464242	24464383	ENSMMUT00000047505	chr1:24464207-24464383	0	0	0	0	0	0	0	0	0	0	0	0	0	0	0	0	0	1	2	0	0	0	0	0	1.22719	0	0	0	0	0	0	0	0.705287
mmu_circ_001454	chr1_24464245_24464383_R	ciRNA	Yes	chr1	24464245	24464383	-	138	138	1	0	138	24464245	24464383	ENSMMUT00000047505	chr1:24464207-24464383	0	0	1	1	2	0	0	0	3	0	2	0	0	0	0	3	2	1	0	0	0	0	0	0	0	0	0	0	0	0.993085	0	0	0.705287
mmu_circ_001457	chr1_24507425_24508139_R	circRNA	Yes	chr1	24507425	24508139	-	330	714	3	0,446,604	161,59,110	24507425,24507871,24508029	24507586,24507930,24508139	ENSMMUT00000047505	chr1:24505209-24507425|chr1:24508139-24513400	2	0	0	0	0	0	0	0	0	0	0	0	0	0	0	0	0	0	0	0	0	0	0	0	0	2.08991	0	0	0	0	0	0	0
mmu_circ_001462	chr1_25607639_25627930_F	circRNA	Yes	chr1	25607639	25627930	+	360	20291	3	0,14241,20157	166,60,134	25607639,25621880,25627796	25607805,25621940,25627930	ENSMMUT00000013655	chr1:25596416-25607639|chr1:25627930-25631507	0	0	1	0	0	0	1	0	0	0	0	0	0	0	0	0	0	0	0	0	0	0	0	0	0	0	0.990325	0	0	0.993085	0	0	0
mmu_circ_001463	chr1_25607639_25636995_F	circRNA	Yes	chr1	25607639	25636995	+	756	29356	7	0,20157,23868,25495,26347,27894,29261	166,134,79,93,107,82,95	25607639,25627796,25631507,25633134,25633986,25635533,25636900	25607805,25627930,25631586,25633227,25634093,25635615,25636995	PREDICTED.1015.2	chr1:25596416-25607639|chr1:25636995-25646769	0	0	0	0	0	0	0	0	0	0	0	0	0	0	0	0	1	0	0	1	0	0	0	0	0	0	0	0	0	0	0	0	0
mmu_circ_001464	chr1_25627796_25636995_F	circRNA	Yes*	chr1	25627796	25636995	+	590	9199	6	0,3711,5338,6190,7737,9104	134,79,93,107,82,95	25627796,25631507,25633134,25633986,25635533,25636900	25627930,25631586,25633227,25634093,25635615,25636995	PREDICTED.836.1	chr1:25621940-25627796|chr1:25636995-25646769	0	0	0	0	0	0	0	0	0	0	0	0	1	0	0	0	0	0	0	0	0	0	0	0	0	0	0	0.688568	0	0	0	0	0
mmu_circ_001465	chr1_25631507_25636995_F	circRNA	Yes	chr1	25631507	25636995	+	456	5488	5	0,1627,2479,4026,5393	79,93,107,82,95	25631507,25633134,25633986,25635533,25636900	25631586,25633227,25634093,25635615,25636995	PREDICTED.1658.1	chr1:25627930-25631507|chr1:25636995-25646769	0	0	0	0	0	0	0	0	0	0	0	0	0	0	0	0	1	0	0	0	0	0	0	1	0	0	0	0	0	0	0	0.401374	0
mmu_circ_001466	chr1_25646769_25651538_F	circRNA	Yes	chr1	25646769	25651538	+	555	4769	5	0,522,2591,3484,4657	143,91,135,74,112	25646769,25647291,25649360,25650253,25651426	25646912,25647382,25649495,25650327,25651538	PREDICTED.870.1	chr1:25636995-25646769|chr1:25651538-25655354	2	0	0	0	0	0	0	0	0	0	0	0	0	0	0	0	0	0	0	0	0	0	0	0	0	2.08991	0	0	0	0	0	0	0
mmu_circ_001467	chr1_25649360_25650327_F	circRNA	Yes	chr1	25649360	25650327	+	209	967	2	0,893	135,74	25649360,25650253	25649495,25650327	PREDICTED.1658.1	chr1:25647382-25649360|chr1:25650327-25651426	0	0	0	0	0	0	0	0	0	0	0	1	0	0	0	0	0	0	1	1	0	0	0	0	0.613597	0	0	0	0	0	0	0	0
mmu_circ_001468	chr1_26012747_26020802_R	circRNA	Yes	chr1	26012747	26020802	-	311	8055	3	0,7293,7949	63,142,106	26012747,26020040,26020696	26012810,26020182,26020802	ENSMMUT00000015355	chr1:26001241-26012747|chr1:26020802-26021880	0	0	0	0	0	0	0	0	0	0	0	0	1	0	0	1	0	0	0	0	0	0	0	0	0	0	0	0.688568	0	0	0	0	0
mmu_circ_001470	chr1_26020040_26020802_R	circRNA	Yes	chr1	26020040	26020802	-	248	762	2	0,656	142,106	26020040,26020696	26020182,26020802	ENSMMUT00000015355	chr1:26012810-26020040|chr1:26020802-26021880	4	1	2	6	4	0	6	1	0	0	0	2	2	0	6	2	6	0	1	0	0	1	0	2	0.613597	4.17982	5.94195	1.37714	1.55173	1.98617	0.430566	0.802748	0
mmu_circ_001471	chr1_26020040_26021943_R	circRNA	Yes	chr1	26020040	26021943	-	311	1903	3	0,656,1840	142,106,63	26020040,26020696,26021880	26020182,26020802,26021943	ENSMMUT00000015355	chr1:26012810-26020040|chr1:26021943-26027700	0	0	0	0	0	0	1	0	0	0	0	0	0	0	0	0	0	1	0	0	0	0	0	0	0	0	0.990325	0	0	0	0	0	0.705287
mmu_circ_001473	chr1_26394932_26395679_F	circRNA	Yes	chr1	26394932	26395679	+	214	747	2	0,638	105,109	26394932,26395570	26395037,26395679	ENSMMUT00000027463	chr1:26388230-26394932|chr1:26395679-26396544	0	0	0	0	0	0	2	0	0	0	0	0	0	1	2	0	1	0	0	1	1	0	0	0	0	0	1.98065	0	0	0	0	0	0
mmu_circ_001474	chr1_26473852_26479265_R	circRNA	Yes	chr1	26473852	26479265	-	307	5413	2	0,5307	201,106	26473852,26479159	26474053,26479265	ENSMMUT00000005987	chr1:26473704-26473852|chr1:26479265-26482722	0	0	0	0	0	0	0	0	0	0	1	0	0	1	0	1	0	1	0	0	0	0	0	0	0	0	0	0	0	0	0	0	0.705287
mmu_circ_001477	chr1_26710553_26713731_R	circRNA	Yes*	chr1	26710553	26713731	-	292	3178	3	0,873,3068	137,45,110	26710553,26711426,26713621	26710690,26711471,26713731	PREDICTED.490.1	chr1:26707837-26710553|chr1:26713731-26714779	0	0	0	0	0	0	0	0	0	0	0	0	0	0	0	0	0	0	1	0	0	0	0	0	0.613597	0	0	0	0	0	0	0	0
mmu_circ_001478	chr1_26719666_26725852_R	circRNA	Yes	chr1	26719666	26725852	-	788	6186	5	0,1310,1975,2566,6014	179,127,188,122,172	26719666,26720976,26721641,26722232,26725680	26719845,26721103,26721829,26722354,26725852	PREDICTED.750.1	chr1:26715740-26719666|chr1:26725852-26728128	0	0	0	0	0	0	0	0	0	0	0	0	0	0	0	0	0	0	1	0	0	1	0	0	0.613597	0	0	0	0	0	0.430566	0	0
mmu_circ_001479	chr1_26721641_26725852_R	circRNA	Yes	chr1	26721641	26725852	-	482	4211	3	0,591,4039	188,122,172	26721641,26722232,26725680	26721829,26722354,26725852	PREDICTED.939.1	chr1:26721103-26721641|chr1:26725852-26728128	1	0	0	0	0	1	0	0	0	0	0	0	0	0	0	0	0	0	0	0	0	0	0	0	0	1.04496	0	0	0	0	0	0	0
mmu_circ_001488	chr1_27427923_27455903_F	circRNA	Yes	chr1	27427923	27455903	+	343	27980	3	0,14166,27873	110,126,107	27427923,27442089,27455796	27428033,27442215,27455903	ENSMMUT00000003431	chr1:27389244-27427923|chr1:27455903-27465663	0	0	0	0	0	0	0	0	0	0	0	0	0	0	0	0	1	0	0	0	1	0	0	0	0	0	0	0	0	0	0	0	0
mmu_circ_001489	chr1_27858214_27859008_R	circRNA	Yes	chr1	27858214	27859008	-	209	794	2	0,676	91,118	27858214,27858890	27858305,27859008	ENSMMUT00000004206	chr1:27853752-27858214|chr1:27859008-27862550	0	0	0	0	0	0	1	0	0	0	0	0	2	0	0	0	0	0	0	0	0	0	0	0	0	0	0.990325	1.37714	0	0	0	0	0
mmu_circ_001490	chr1_27874027_27875867_R	circRNA	Yes	chr1	27874027	27875867	-	236	1840	2	0,1688	84,152	27874027,27875715	27874111,27875867	ENSMMUT00000047487	chr1:27872906-27874027|chr1:27875867-27877006	1	0	0	0	0	0	1	0	0	0	0	0	0	0	0	0	1	0	0	0	0	0	0	0	0	1.04496	0.990325	0	0	0	0	0	0
mmu_circ_001492	chr1_27914143_27915542_F	circRNA	Yes	chr1	27914143	27915542	+	161	1399	2	0,1306	68,93	27914143,27915449	27914211,27915542	ENSMMUT00000047485	chr1:27905846-27914143|chr1:27915542-27919926	0	0	0	0	0	0	0	0	0	0	0	0	0	2	1	0	0	2	0	0	0	0	1	0	0	0	0	0	0	0	0	0	1.41057
mmu_circ_001498	chr1_28671931_28673340_R	circRNA	Yes*	chr1	28671931	28673340	-	382	1409	3	0,426,1175	125,23,234	28671931,28672357,28673106	28672056,28672380,28673340	PREDICTED.1724.1	chr1:28667972-28671931|chr1:28673340-28674980	0	0	0	0	0	0	0	0	0	0	0	0	0	0	1	0	0	0	0	0	0	0	0	0	0	0	0	0	0	0	0	0	0
mmu_circ_001499	chr1_28674980_28676046_R	circRNA	Yes	chr1	28674980	28676046	-	265	1066	2	0,897	96,169	28674980,28675877	28675076,28676046	PREDICTED.1215.1	chr1:28673340-28674980|chr1:28676046-28681275	0	0	0	0	0	0	0	0	0	0	0	0	0	2	0	0	1	0	0	0	0	0	0	0	0	0	0	0	0	0	0	0	0
mmu_circ_001502	chr1_28858506_28862950_F	circRNA	Yes	chr1	28858506	28862950	+	226	4444	2	0,4291	73,153	28858506,28862797	28858579,28862950	PREDICTED.1168.1	chr1:28852755-28858506|chr1:28862950-28873649	1	0	0	0	0	0	0	0	0	0	0	0	0	0	0	0	0	1	0	0	0	0	0	0	0	1.04496	0	0	0	0	0	0	0.705287
mmu_circ_001503	chr1_28873649_28878395_F	circRNA	Yes	chr1	28873649	28878395	+	1133	4746	4	0,2411,2957,4560	695,134,118,186	28873649,28876060,28876606,28878209	28874344,28876194,28876724,28878395	PREDICTED.1168.1	chr1:28862950-28873649|chr1:28878395-28886632	0	0	0	0	0	0	0	0	0	0	0	0	2	0	2	0	0	0	0	0	0	0	0	0	0	0	0	1.37714	0	0	0	0	0
mmu_circ_001505	chr1_28876060_28878395_F	circRNA	Yes	chr1	28876060	28878395	+	438	2335	3	0,546,2149	134,118,186	28876060,28876606,28878209	28876194,28876724,28878395	ENSMMUT00000000928	chr1:28874344-28876060|chr1:28878395-28886632	1	0	0	0	0	0	1	0	2	0	3	0	4	0	4	0	2	0	0	0	1	0	0	0	0	1.04496	0.990325	2.75427	0	0	0	0	0
mmu_circ_001508	chr1_29075135_29077068_F	circRNA	Yes	chr1	29075135	29077068	+	219	1933	2	0,1831	117,102	29075135,29076966	29075252,29077068	ENSMMUT00000047465	chr1:29071375-29075135|chr1:29077068-29090103	3	0	0	0	2	0	6	4	3	0	0	1	6	7	2	3	0	2	0	0	0	0	0	0	0	3.13487	5.94195	4.13141	0	0	0	0	1.41057
mmu_circ_001509	chr1_29090103_29092464_F	circRNA	Yes	chr1	29090103	29092464	+	223	2361	2	0,2253	115,108	29090103,29092356	29090218,29092464	ENSMMUT00000047465	chr1:29077068-29090103|chr1:29092464-29101529	0	0	0	0	0	1	1	3	1	1	0	0	0	3	0	0	0	0	0	0	0	0	0	0	0	0	0.990325	0	0	0	0	0	0
mmu_circ_001511	chr1_29373853_29376975_F	circRNA	Yes	chr1	29373853	29376975	+	783	3122	3	0,1494,3005	213,453,117	29373853,29375347,29376858	29374066,29375800,29376975	PREDICTED.1967.3	chr1:29341796-29373853|chr1:29376975-29406026	5	7	4	2	0	3	7	2	1	7	5	6	4	2	3	9	7	2	0	0	2	0	0	1	0	5.22478	6.93227	2.75427	10.8621	3.97234	0	0.401374	1.41057
mmu_circ_001512	chr1_29406026_29408494_F	circRNA	Yes	chr1	29406026	29408494	+	812	2468	4	0,530,1298,2155	241,90,168,313	29406026,29406556,29407324,29408181	29406267,29406646,29407492,29408494	PREDICTED.834.3	chr1:29376975-29406026|chr1:29408494-29411037	0	0	0	0	0	0	0	0	0	1	0	0	0	1	0	0	0	0	0	0	0	0	0	0	0	0	0	0	0	0	0	0	0
mmu_circ_001517	chr1_29542364_29542789_R	circRNA	Yes	chr1	29542364	29542789	-	425	425	1	0	425	29542364	29542789	ENSMMUT00000026318	chr1:29538676-29542364|chr1:29542789-29545572	0	0	0	0	0	0	0	1	0	0	0	0	0	1	0	0	0	0	0	0	0	0	0	0	0	0	0	0	0	0	0	0	0
mmu_circ_001518	chr1_29586687_29587048_F	circRNA	Yes	chr1	29586687	29587048	+	361	361	1	0	361	29586687	29587048	PREDICTED.1091.1	chr1:29569724-29586687|chr1:29587048-29587886	0	0	0	0	0	0	5	0	0	0	0	0	0	0	0	0	0	0	0	0	0	0	0	0	0	0	4.95162	0	0	0	0	0	0
mmu_circ_001519	chr1_29586687_29587048_F	circRNA	Yes	chr1	29586687	29587048	+	270	361	2	0,295	204,66	29586687,29586982	29586891,29587048	ENSMMUT00000014381	chr1:29569724-29586687|chr1:29587048-29587886	0	0	0	0	0	0	0	2	1	0	0	2	0	0	3	0	1	0	0	0	0	0	0	0	0	0	0	0	0	0	0	0	0
mmu_circ_001523	chr1_30085625_30092050_R	circRNA	Yes	chr1	30085625	30092050	-	694	6425	5	0,2188,3333,5613,6290	156,131,118,154,135	30085625,30087813,30088958,30091238,30091915	30085781,30087944,30089076,30091392,30092050	PREDICTED.2054.2	chr1:30082923-30085625|chr1:30092050-30101945	0	0	0	0	1	0	0	0	0	0	0	0	0	0	0	0	0	1	0	0	0	0	0	0	0	0	0	0	0	0	0	0	0.705287
mmu_circ_001524	chr1_30441211_30448461_F	circRNA	Yes	chr1	30441211	30448461	+	223	7250	2	0,7114	87,136	30441211,30448325	30441298,30448461	PREDICTED.1180.4	chr1:30437568-30441211|chr1:30448461-30452690	1	0	1	0	1	0	1	1	0	0	0	0	0	1	0	0	0	0	0	0	0	0	0	0	0	1.04496	0.990325	0	0	0.993085	0	0	0
mmu_circ_001525	chr1_30483646_30488022_F	circRNA	Yes	chr1	30483646	30488022	+	170	4376	2	0,4276	70,100	30483646,30487922	30483716,30488022	ENSMMUT00000047443	chr1:30466930-30483646|chr1:30488022-30495899	5	0	0	3	0	0	5	3	2	2	1	0	1	4	4	1	4	2	0	0	3	0	2	0	0	5.22478	4.95162	0.688568	0	0	0	0	1.41057
mmu_circ_001526	chr1_30483646_30505960_F	circRNA	Yes*	chr1	30483646	30505960	+	458	22314	5	0,4276,12253,20346,22208	70,100,138,44,106	30483646,30487922,30495899,30503992,30505854	30483716,30488022,30496037,30504036,30505960	ENSMMUT00000047443	chr1:30466930-30483646|chr1:30505960-30512117	0	1	0	0	0	0	0	0	0	0	0	0	0	0	0	0	0	0	0	0	0	0	0	0	0	0	0	0	1.55173	0	0	0	0
mmu_circ_001527	chr1_30487922_30505960_F	circRNA	Yes	chr1	30487922	30505960	+	388	18038	4	0,7977,16070,17932	100,138,44,106	30487922,30495899,30503992,30505854	30488022,30496037,30504036,30505960	ENSMMUT00000047443	chr1:30483716-30487922|chr1:30505960-30512117	0	0	0	1	0	0	0	0	0	0	0	0	0	0	0	1	0	1	0	0	0	0	0	0	0	0	0	0	0	0	0	0	0.705287
mmu_circ_001528	chr1_30535027_30537666_F	circRNA	Yes	chr1	30535027	30537666	+	366	2639	2	0,2494	221,145	30535027,30537521	30535248,30537666	PREDICTED.691.2	chr1:30532279-30535027|chr1:30537666-30540842	1	0	0	0	0	0	0	0	0	2	0	0	0	3	0	0	2	0	1	0	0	0	0	0	0.613597	1.04496	0	0	0	0	0	0	0
mmu_circ_001532	chr1_30679347_30686807_R	circRNA	Yes	chr1	30679347	30686807	-	301	7460	4	0,968,2971,7376	59,68,90,84	30679347,30680315,30682318,30686723	30679406,30680383,30682408,30686807	PREDICTED.1070.1	chr1:30675610-30679347|chr1:30686807-30693483	0	0	0	0	0	0	0	0	0	0	0	0	0	0	0	0	2	0	0	0	0	0	0	0	0	0	0	0	0	0	0	0	0
mmu_circ_001534	chr1_30693483_30731518_R	circRNA	Yes	chr1	30693483	30731518	-	738	38035	7	0,2140,6311,25199,28486,32552,37991	140,184,86,137,67,80,44	30693483,30695623,30699794,30718682,30721969,30726035,30731474	30693623,30695807,30699880,30718819,30722036,30726115,30731518	PREDICTED.2080.4	chr1:30686807-30693483|chr1:30731518-30742931	0	0	0	0	0	1	0	0	0	0	2	0	0	0	1	0	0	0	0	0	0	0	0	0	0	0	0	0	0	0	0	0	0
mmu_circ_001535	chr1_30710981_30731518_R	circRNA	Yes	chr1	30710981	30731518	-	466	20537	5	0,7701,10988,15054,20493	138,137,67,80,44	30710981,30718682,30721969,30726035,30731474	30711119,30718819,30722036,30726115,30731518	ENSMMUT00000018185	chr1:30699880-30710981|chr1:30731518-30742931	0	0	0	0	0	0	0	0	0	0	0	0	0	0	0	0	0	0	0	0	0	2	0	0	0	0	0	0	0	0	0.861132	0	0
mmu_circ_001536	chr1_30718682_30731518_R	circRNA	Yes	chr1	30718682	30731518	-	328	12836	4	0,3287,7353,12792	137,67,80,44	30718682,30721969,30726035,30731474	30718819,30722036,30726115,30731518	ENSMMUT00000018185	chr1:30711119-30718682|chr1:30731518-30742931	0	0	3	4	2	0	0	0	0	0	0	0	1	3	3	2	0	0	1	0	4	0	0	0	0.613597	0	0	0.688568	0	2.97926	0	0	0
mmu_circ_001537	chr1_30718682_30743032_R	circRNA	Yes	chr1	30718682	30743032	-	349	24350	4	0,3287,12792,24249	137,67,44,101	30718682,30721969,30731474,30742931	30718819,30722036,30731518,30743032	PREDICTED.882.1	chr1:30711119-30718682|chr1:30743032-30771496	0	0	0	0	0	0	0	0	0	0	0	0	0	0	0	0	0	3	0	0	0	0	0	0	0	0	0	0	0	0	0	0	2.11586
mmu_circ_001538	chr1_30718682_30743032_R	circRNA	Yes	chr1	30718682	30743032	-	429	24350	5	0,3287,7353,12792,24249	137,67,80,44,101	30718682,30721969,30726035,30731474,30742931	30718819,30722036,30726115,30731518,30743032	ENSMMUT00000018185	chr1:30711119-30718682|chr1:30743032-30771496	0	0	0	0	0	1	1	3	0	0	2	0	1	0	4	0	0	0	0	0	1	0	0	0	0	0	0.990325	0.688568	0	0	0	0	0
mmu_circ_001539	chr1_30718682_30743032_R	circRNA	Yes	chr1	30718682	30743032	-	555	24350	6	0,3287,7353,12792,22907,24249	137,67,80,44,126,101	30718682,30721969,30726035,30731474,30741589,30742931	30718819,30722036,30726115,30731518,30741715,30743032	PREDICTED.1278.2	chr1:30699880-30718682|chr1:30743032-30771496	0	0	0	0	0	0	0	0	0	0	0	0	0	0	0	2	0	0	0	0	0	0	0	0	0	0	0	0	0	0	0	0	0
mmu_circ_001541	chr1_31183916_31184514_F	circRNA	Yes	chr1	31183916	31184514	+	598	598	1	0	598	31183916	31184514	PREDICTED.1580.1	chr1:31176639-31183916|chr1:31184514-31186949	0	0	0	0	1	0	0	0	1	1	0	0	0	0	1	0	1	0	0	0	1	0	0	0	0	0	0	0	0	0	0	0	0
mmu_circ_001542	chr1_31183916_31187134_F	circRNA	Yes	chr1	31183916	31187134	+	783	3218	2	0,3033	598,185	31183916,31186949	31184514,31187134	ENSMMUT00000047437	chr1:31176639-31183916|chr1:31187134-31190779	1	0	0	0	0	0	0	3	0	0	0	0	1	0	1	0	1	0	0	0	0	0	0	0	0	1.04496	0	0.688568	0	0	0	0	0
mmu_circ_001543	chr1_31183916_31190933_F	circRNA	Yes	chr1	31183916	31190933	+	937	7017	3	0,3033,6863	598,185,154	31183916,31186949,31190779	31184514,31187134,31190933	ENSMMUT00000047437	chr1:31176639-31183916|chr1:31190933-31203885	0	1	0	0	3	1	0	1	0	0	2	0	3	0	1	0	1	0	0	0	0	0	0	0	0	0	0	2.0657	1.55173	0	0	0	0
mmu_circ_001545	chr1_31311077_31311207_R	circRNA	Yes	chr1	31311077	31311207	-	130	130	1	0	130	31311077	31311207	ENSMMUT00000034122	None|None	0	0	0	0	0	0	0	0	0	0	0	0	0	0	0	0	0	0	0	0	0	2	0	0	0	0	0	0	0	0	0.861132	0	0
mmu_circ_001547	chr1_31472826_31474410_F	circRNA	Yes	chr1	31472826	31474410	+	1584	1584	1	0	1584	31472826	31474410	ENSMMUT00000047434	chr1:31468440-31472826|chr1:31474410-31505071	0	0	0	0	0	0	1	0	0	0	0	0	0	0	0	1	0	0	0	0	0	0	0	0	0	0	0.990325	0	0	0	0	0	0
mmu_circ_001553	chr1_31895209_31895424_R	circRNA	Yes	chr1	31895209	31895424	-	215	215	1	0	215	31895209	31895424	ENSMMUT00000009922	chr1:31890880-31895209|chr1:31895424-31899570	0	0	0	0	0	0	0	0	0	0	0	0	0	0	1	0	0	0	1	1	0	1	0	0	0.613597	0	0	0	0	0	0.430566	0	0
mmu_circ_001554	chr1_31943469_31944751_R	circRNA	Yes	chr1	31943469	31944751	-	206	1282	2	0,1179	103,103	31943469,31944648	31943572,31944751	ENSMMUT00000021963	chr1:31942136-31943469|chr1:31944751-31948087	0	0	0	0	2	0	2	0	0	0	0	0	0	0	0	0	0	1	0	0	0	0	0	0	0	0	1.98065	0	0	0	0	0	0.705287
mmu_circ_001562	chr1_33733027_33749362_R	circRNA	Yes	chr1	33733027	33749362	-	1165	16335	7	0,1303,2489,3686,9633,14988,16241	237,297,144,139,152,102,94	33733027,33734330,33735516,33736713,33742660,33748015,33749268	33733264,33734627,33735660,33736852,33742812,33748117,33749362	ENSMMUT00000018986	chr1:33722240-33733027|chr1:33749362-33760378	0	1	0	0	0	0	0	0	0	0	0	0	0	0	1	0	0	0	0	0	0	0	0	0	0	0	0	0	1.55173	0	0	0	0
mmu_circ_001569	chr1_33748015_33763248_R	circRNA	Yes	chr1	33748015	33763248	-	637	15233	4	0,1253,12363,15066	105,94,271,167	33748015,33749268,33760378,33763081	33748120,33749362,33760649,33763248	ENSMMUT00000047431	chr1:33742812-33748015|chr1:33763248-33773472	1	0	0	0	0	0	1	0	0	0	1	0	0	0	0	0	0	0	0	0	0	0	0	0	0	1.04496	0.990325	0	0	0	0	0	0
mmu_circ_001570	chr1_33760378_33763248_R	circRNA	Yes	chr1	33760378	33763248	-	438	2870	2	0,2703	271,167	33760378,33763081	33760649,33763248	ENSMMUT00000047431	chr1:33749362-33760378|chr1:33763248-33773472	6	4	1	2	2	4	3	6	3	0	1	1	9	3	18	5	4	9	4	1	5	2	1	0	2.45439	6.26973	2.97097	6.19711	6.2069	0.993085	0.861132	0	6.34759
mmu_circ_001571	chr1_33760378_33774719_R	circRNA	Yes	chr1	33760378	33774719	-	726	14341	4	0,2703,13094,14232	271,167,179,109	33760378,33763081,33773472,33774610	33760649,33763248,33773651,33774719	ENSMMUT00000018986	chr1:33749362-33760378|chr1:33774719-33798057	1	2	0	0	1	0	0	0	0	0	0	0	0	0	2	0	0	0	1	0	0	0	0	0	0.613597	1.04496	0	0	3.10345	0	0	0	0
mmu_circ_001572	chr1_33773472_33774719_R	circRNA	Yes	chr1	33773472	33774719	-	288	1247	2	0,1138	179,109	33773472,33774610	33773651,33774719	ENSMMUT00000018986	chr1:33763248-33773472|chr1:33774719-33798057	0	0	0	0	0	0	0	0	0	0	0	0	0	2	0	0	1	0	0	0	0	0	0	1	0	0	0	0	0	0	0	0.401374	0
mmu_circ_001573	chr1_33798057_33832031_R	circRNA	Yes	chr1	33798057	33832031	-	443	33974	2	0,33600	69,374	33798057,33831657	33798126,33832031	PREDICTED.1110.6	chr1:33774719-33798057|chr1:33832031-33838364	0	0	0	0	0	0	1	0	0	0	0	1	0	0	0	0	0	0	0	0	0	0	0	0	0	0	0.990325	0	0	0	0	0	0
mmu_circ_001574	chr1_33831657_33832031_R	circRNA	Yes	chr1	33831657	33832031	-	374	374	1	0	374	33831657	33832031	PREDICTED.1415.4	chr1:33798126-33831657|chr1:33832031-33838364	1	0	0	0	0	1	0	0	0	0	0	0	1	0	0	1	0	0	0	0	0	0	0	0	0	1.04496	0	0.688568	0	0	0	0	0
mmu_circ_001578	chr1_34068667_34070407_R	circRNA	Yes	chr1	34068667	34070407	-	224	1740	2	0,1610	94,130	34068667,34070277	34068761,34070407	ENSMMUT00000027255	chr1:34066626-34068667|chr1:34070407-34073917	0	0	0	0	0	0	0	0	0	0	0	1	0	0	0	0	0	0	0	0	1	0	0	0	0	0	0	0	0	0	0	0	0
mmu_circ_001579	chr1_34085739_34125858_F	circRNA	Yes	chr1	34085739	34125858	+	619	40119	6	0,9895,28253,30050,37741,39973	121,58,101,92,101,146	34085739,34095634,34113992,34115789,34123480,34125712	34085860,34095692,34114093,34115881,34123581,34125858	ENSMMUT00000017031	chr1:34074382-34085739|chr1:34125858-34142378	0	0	0	0	0	0	0	0	0	0	0	1	0	0	2	0	0	0	0	0	0	0	0	0	0	0	0	0	0	0	0	0	0
mmu_circ_001580	chr1_34113992_34125858_F	circRNA	Yes	chr1	34113992	34125858	+	440	11866	4	0,1797,9488,11720	101,92,101,146	34113992,34115789,34123480,34125712	34114093,34115881,34123581,34125858	ENSMMUT00000047430	chr1:34095692-34113992|chr1:34125858-34142378	5	1	0	3	2	0	6	0	0	2	0	1	4	0	14	0	3	4	0	0	2	0	0	0	0	5.22478	5.94195	2.75427	1.55173	0	0	0	2.82115
mmu_circ_001581	chr1_34123480_34125858_F	circRNA	Yes	chr1	34123480	34125858	+	247	2378	2	0,2232	101,146	34123480,34125712	34123581,34125858	PREDICTED.2159.4	chr1:34115881-34123480|chr1:34125858-34142378	0	0	0	0	0	0	0	1	0	0	0	0	0	0	0	1	0	0	0	0	0	0	0	0	0	0	0	0	0	0	0	0	0
mmu_circ_001586	chr1_34667677_34669779_R	circRNA	Yes	chr1	34667677	34669779	-	206	2102	2	0,1971	75,131	34667677,34669648	34667752,34669779	PREDICTED.2193.2	chr1:34666411-34667677|chr1:34669779-34676866	0	0	0	0	0	0	0	2	0	0	1	0	0	2	0	0	0	0	0	0	0	0	0	0	0	0	0	0	0	0	0	0	0
mmu_circ_001587	chr1_34667677_34677554_R	circRNA	Yes	chr1	34667677	34677554	-	894	9877	3	0,1971,9189	75,131,688	34667677,34669648,34676866	34667752,34669779,34677554	PREDICTED.2193.2	chr1:34666411-34667677|chr1:34677554-34692936	0	0	1	0	0	0	0	0	0	0	2	0	0	0	0	0	0	0	0	0	0	0	0	0	0	0	0	0	0	0.993085	0	0	0
mmu_circ_001588	chr1_34667677_34677554_R	circRNA	Yes	chr1	34667677	34677554	-	975	9877	5	0,1971,6143,8995,9189	75,131,32,49,688	34667677,34669648,34673820,34676672,34676866	34667752,34669779,34673852,34676721,34677554	PREDICTED.518.2	chr1:34666411-34667677|chr1:34677554-34692936	0	0	0	0	0	0	0	0	0	0	0	0	0	0	0	0	0	2	0	0	0	0	0	0	0	0	0	0	0	0	0	0	1.41057
mmu_circ_001589	chr1_34669648_34677554_R	circRNA	Yes	chr1	34669648	34677554	-	900	7906	4	0,4172,7024,7218	131,32,49,688	34669648,34673820,34676672,34676866	34669779,34673852,34676721,34677554	PREDICTED.699.1	chr1:34667752-34669648|chr1:34677554-34686023	0	0	0	0	0	0	0	2	0	0	0	0	0	1	0	0	0	0	0	0	2	0	0	0	0	0	0	0	0	0	0	0	0
mmu_circ_001591	chr1_34673820_34677554_R	circRNA	Yes	chr1	34673820	34677554	-	769	3734	3	0,2852,3046	32,49,688	34673820,34676672,34676866	34673852,34676721,34677554	PREDICTED.700.1	chr1:34669779-34673820|chr1:34677554-34678273	0	0	1	0	0	0	0	0	2	0	0	0	0	0	2	0	4	1	0	0	0	0	0	0	0	0	0	0	0	0.993085	0	0	0.705287
mmu_circ_001592	chr1_34785376_34786723_F	circRNA	Yes	chr1	34785376	34786723	+	242	1347	2	0,1230	125,117	34785376,34786606	34785501,34786723	PREDICTED.1166.1	chr1:34771340-34785376|chr1:34786723-34788266	0	0	0	0	0	1	1	0	0	0	1	0	0	0	0	0	0	0	0	0	0	0	0	0	0	0	0.990325	0	0	0	0	0	0
mmu_circ_001593	chr1_34909466_34915047_F	circRNA	Yes	chr1	34909466	34915047	+	554	5581	5	0,2553,3050,4288,5449	134,93,100,95,132	34909466,34912019,34912516,34913754,34914915	34909600,34912112,34912616,34913849,34915047	PREDICTED.461.2	chr1:34863872-34909466|chr1:34915047-34916129	0	0	0	0	0	0	1	1	0	0	0	0	0	0	0	0	0	0	0	0	0	0	0	0	0	0	0.990325	0	0	0	0	0	0
mmu_circ_001596	chr1_34948840_34949838_F	circRNA	Yes	chr1	34948840	34949838	+	288	998	3	0,351,905	120,75,93	34948840,34949191,34949745	34948960,34949266,34949838	PREDICTED.2202.1	chr1:34946483-34948840|chr1:34949838-34950509	0	0	0	2	1	2	3	0	0	0	2	0	2	2	3	0	1	1	1	0	0	0	0	0	0.613597	0	2.97097	1.37714	0	0	0	0	0.705287
mmu_circ_001597	chr1_34986420_34987132_F	circRNA	Yes	chr1	34986420	34987132	+	275	712	3	0,230,638	111,90,74	34986420,34986650,34987058	34986531,34986740,34987132	PREDICTED.707.2	chr1:34984393-34986420|chr1:34987132-34988764	0	0	0	0	1	0	1	0	1	0	0	1	1	4	3	2	2	0	0	0	2	0	0	0	0	0	0.990325	0.688568	0	0	0	0	0
mmu_circ_001598	chr1_35403282_35405552_R	circRNA	Yes	chr1	35403282	35405552	-	258	2270	3	0,1836,2148	53,83,122	35403282,35405118,35405430	35403335,35405201,35405552	PREDICTED.470.2	chr1:35397984-35403282|chr1:35405552-35425062	1	0	0	0	3	0	4	3	2	0	0	0	0	0	2	0	0	2	0	0	2	0	0	0	0	1.04496	3.9613	0	0	0	0	0	1.41057
mmu_circ_001600	chr1_35609474_35614510_F	circRNA	Yes	chr1	35609474	35614510	+	1146	5036	4	0,1098,3000,4932	117,836,89,104	35609474,35610572,35612474,35614406	35609591,35611408,35612563,35614510	ENSMMUT00000000446	chr1:35601297-35609474|chr1:35614510-35639097	0	0	0	0	0	1	0	0	0	0	0	0	0	0	0	1	0	0	0	0	0	0	0	0	0	0	0	0	0	0	0	0	0
mmu_circ_001601	chr1_35610572_35611408_F	circRNA	Yes	chr1	35610572	35611408	+	836	836	1	0	836	35610572	35611408	ENSMMUT00000000446	chr1:35609591-35610572|chr1:35611408-35612474	1	1	0	0	0	0	1	0	0	1	0	0	0	0	0	0	0	0	0	0	0	0	0	0	0	1.04496	0.990325	0	1.55173	0	0	0	0
mmu_circ_001603	chr1_35735640_35741393_R	circRNA	Yes	chr1	35735640	35741393	-	767	5753	5	0,1475,2360,4195,5547	141,115,163,142,206	35735640,35737115,35738000,35739835,35741187	35735781,35737230,35738163,35739977,35741393	ENSMMUT00000008793	chr1:35733804-35735640|chr1:35741393-35755816	0	0	0	0	0	0	0	0	0	0	0	0	0	1	0	1	0	0	0	0	0	0	0	0	0	0	0	0	0	0	0	0	0
mmu_circ_001604	chr1_35739835_35741393_R	circRNA	Yes	chr1	35739835	35741393	-	348	1558	2	0,1352	142,206	35739835,35741187	35739977,35741393	ENSMMUT00000008793	chr1:35738163-35739835|chr1:35741393-35755816	0	2	0	0	0	0	3	0	0	0	0	0	0	1	0	0	0	0	0	0	0	0	0	1	0	0	2.97097	0	3.10345	0	0	0.401374	0
mmu_circ_001606	chr1_36080400_36080766_F	circRNA	Yes	chr1	36080400	36080766	+	238	366	2	0,207	79,159	36080400,36080607	36080479,36080766	ENSMMUT00000004621	chr1:36069077-36080400|chr1:36080766-36084524	0	0	0	0	2	0	2	0	0	0	0	4	3	4	3	1	0	1	0	0	0	0	0	0	0	0	1.98065	2.0657	0	0	0	0	0.705287
mmu_circ_001608	chr1_37791561_37804536_R	circRNA	Yes*	chr1	37791561	37804536	-	333	12975	3	0,11673,12834	154,38,141	37791561,37803234,37804395	37791715,37803272,37804536	PREDICTED.1440.2	chr1:37782236-37791561|chr1:37804536-37806464	0	0	0	0	0	0	0	0	0	0	0	0	0	0	0	1	0	0	0	0	0	0	0	0	0	0	0	0	0	0	0	0	0
mmu_circ_001612	chr1_37917602_37918077_F	circRNA	Yes*	chr1	37917602	37918077	+	388	475	2	0,262	175,213	37917602,37917864	37917777,37918077	ENSMMUT00000023144	chr1:37910559-37917602|chr1:37918077-37922614	0	0	0	0	0	0	0	0	0	0	0	0	1	0	0	0	0	0	0	0	0	0	0	0	0	0	0	0.688568	0	0	0	0	0
mmu_circ_001616	chr1_38167477_38170326_F	circRNA	Yes	chr1	38167477	38170326	+	755	2849	3	0,2262,2678	522,62,171	38167477,38169739,38170155	38167999,38169801,38170326	PREDICTED.2437.1	chr1:38128358-38167477|chr1:38170326-38178191	6	6	0	0	12	9	0	22	0	2	3	7	18	3	24	19	8	12	5	4	0	7	0	4	3.06799	6.26973	0	12.3942	9.31035	0	3.01396	1.6055	8.46345
mmu_circ_001617	chr1_38167477_38170326_F	circRNA	Yes	chr1	38167477	38170326	+	937	2849	4	0,671,2262,2678	522,182,62,171	38167477,38168148,38169739,38170155	38167999,38168330,38169801,38170326	PREDICTED.859.1	chr1:38128358-38167477|chr1:38170326-38178191	0	0	0	25	0	0	0	0	0	0	0	0	0	0	0	0	0	0	0	0	0	0	0	0	0	0	0	0	0	0	0	0	0
mmu_circ_001618	chr1_38167477_38178276_F	circRNA	Yes*	chr1	38167477	38178276	+	840	10799	4	0,2262,2678,10714	522,62,171,85	38167477,38169739,38170155,38178191	38167999,38169801,38170326,38178276	PREDICTED.1037.3	chr1:38167281-38167477|chr1:38178276-38178530	0	0	0	0	0	0	0	0	0	0	0	0	0	0	0	0	0	0	0	1	0	0	0	0	0	0	0	0	0	0	0	0	0
mmu_circ_001619	chr1_38167477_38178786_F	circRNA	Yes	chr1	38167477	38178786	+	1096	11309	5	0,2262,2678,10714,11053	522,62,171,85,256	38167477,38169739,38170155,38178191,38178530	38167999,38169801,38170326,38178276,38178786	PREDICTED.1262.1	chr1:38128358-38167477|chr1:38178786-38190644	0	0	0	0	0	1	0	0	0	0	0	0	0	0	0	0	1	0	0	0	0	0	0	0	0	0	0	0	0	0	0	0	0
mmu_circ_001621	chr1_38190644_38191143_F	circRNA	Yes*	chr1	38190644	38191143	+	388	499	2	0,286	175,213	38190644,38190930	38190819,38191143	PREDICTED.1037.3	chr1:38178786-38190644|chr1:38191143-38194805	0	0	0	0	0	0	0	0	0	0	0	0	0	0	0	1	0	0	0	0	0	0	0	0	0	0	0	0	0	0	0	0	0
mmu_circ_001625	chr1_38214732_38217835_F	circRNA	Yes	chr1	38214732	38217835	+	420	3103	3	0,341,2951	172,96,152	38214732,38215073,38217683	38214904,38215169,38217835	PREDICTED.1037.3	chr1:38209087-38214732|chr1:38217835-38223327	0	0	0	0	0	0	0	0	0	0	0	0	0	0	2	1	0	1	1	0	0	1	0	0	0.613597	0	0	0	0	0	0.430566	0	0.705287
mmu_circ_001629	chr1_38267448_38267677_R	circRNA	Yes	chr1	38267448	38267677	-	229	229	1	0	229	38267448	38267677	PREDICTED.2369.1	chr1:38265890-38267448|chr1:38267677-38271425	0	0	0	0	0	0	0	0	0	0	0	0	0	0	0	0	2	0	0	0	0	0	0	0	0	0	0	0	0	0	0	0	0
mmu_circ_001631	chr1_38284315_38288393_R	circRNA	Yes	chr1	38284315	38288393	-	349	4078	2	0,3831	102,247	38284315,38288146	38284417,38288393	ENSMMUT00000027836	chr1:38280501-38284315|chr1:38288393-38318923	0	0	1	0	0	0	0	0	0	0	0	0	0	0	1	0	0	0	0	0	1	0	0	1	0	0	0	0	0	0.993085	0	0.401374	0
mmu_circ_001632	chr1_38288146_38288393_R	circRNA	Yes	chr1	38288146	38288393	-	247	247	1	0	247	38288146	38288393	PREDICTED.2369.1	chr1:38284417-38288146|chr1:38288393-38318923	1	0	0	0	0	0	1	0	0	0	0	0	0	0	1	0	0	0	0	0	0	0	0	0	0	1.04496	0.990325	0	0	0	0	0	0
mmu_circ_001636	chr1_38651515_38662256_F	circRNA	Yes	chr1	38651515	38662256	+	829	10741	6	0,6579,9213,9580,9827,10653	166,121,182,137,135,88	38651515,38658094,38660728,38661095,38661342,38662168	38651681,38658215,38660910,38661232,38661477,38662256	PREDICTED.1459.1	chr1:38642464-38651515|chr1:38662256-38666764	0	0	0	2	0	0	0	0	0	0	0	2	0	0	1	0	0	0	0	0	0	0	0	0	0	0	0	0	0	0	0	0	0
mmu_circ_001637	chr1_38660728_38662256_F	circRNA	Yes	chr1	38660728	38662256	+	542	1528	4	0,367,614,1440	182,137,135,88	38660728,38661095,38661342,38662168	38660910,38661232,38661477,38662256	PREDICTED.1459.1	chr1:38658215-38660728|chr1:38662256-38666764	1	0	0	0	0	0	0	0	0	0	0	0	0	0	2	0	0	0	0	0	0	0	0	0	0	1.04496	0	0	0	0	0	0	0
mmu_circ_001639	chr1_38742888_38743751_F	circRNA	Yes*	chr1	38742888	38743751	+	377	863	3	0,473,729	120,123,134	38742888,38743361,38743617	38743008,38743484,38743751	PREDICTED.1482.1	chr1:38736623-38742888|chr1:38743751-38748696	0	0	0	0	0	0	0	0	0	0	0	0	0	0	0	0	0	0	0	0	0	0	1	0	0	0	0	0	0	0	0	0	0
mmu_circ_001640	chr1_38743361_38743751_F	circRNA	Yes*	chr1	38743361	38743751	+	257	390	2	0,256	123,134	38743361,38743617	38743484,38743751	PREDICTED.1482.1	chr1:38743008-38743361|chr1:38743751-38748696	1	0	0	0	0	0	0	0	0	0	0	0	0	0	0	0	0	0	0	0	0	0	0	0	0	1.04496	0	0	0	0	0	0	0
mmu_circ_001642	chr1_38807651_38814505_F	circRNA	Yes*	chr1	38807651	38814505	+	467	6854	3	0,5056,6717	121,209,137	38807651,38812707,38814368	38807772,38812916,38814505	PREDICTED.1209.1	chr1:38785712-38807651|chr1:38814505-38844217	0	0	0	0	0	0	0	0	0	0	0	0	0	0	0	0	0	0	0	0	1	0	0	0	0	0	0	0	0	0	0	0	0
mmu_circ_001648	chr1_38930422_38931710_F	circRNA	Yes*	chr1	38930422	38931710	+	591	1288	4	0,375,667,1187	97,208,185,101	38930422,38930797,38931089,38931609	38930519,38931005,38931274,38931710	ENSMMUT00000016849	chr1:38928350-38930422|chr1:38931710-38932285	0	0	0	0	0	0	0	0	1	0	0	0	0	0	0	0	0	0	0	0	0	0	0	0	0	0	0	0	0	0	0	0	0
mmu_circ_001660	chr1_40446245_40447953_R	circRNA	Yes	chr1	40446245	40447953	-	340	1708	3	0,551,1641	114,159,67	40446245,40446796,40447886	40446359,40446955,40447953	ENSMMUT00000011769	chr1:40440551-40446245|chr1:40447953-40451969	0	0	0	0	1	0	0	0	0	0	0	1	1	0	0	0	0	1	0	0	0	0	0	0	0	0	0	0.688568	0	0	0	0	0.705287
mmu_circ_001662	chr1_4047835_4048042_R	ciRNA	Yes	chr1	4047835	4048042	-	207	207	1	0	207	4047835	4048042	PREDICTED.143.1	chr1:4047814-4048042	0	0	0	0	0	0	1	0	0	0	0	0	0	0	0	0	0	2	0	0	0	0	0	0	0	0	0.990325	0	0	0	0	0	1.41057
mmu_circ_001663	chr1_4047836_4048042_R	ciRNA	Yes	chr1	4047836	4048042	-	206	206	1	0	206	4047836	4048042	PREDICTED.143.1	chr1:4047814-4048042	0	0	0	0	0	0	1	0	0	0	1	0	0	0	0	0	0	0	0	1	0	0	0	0	0	0	0.990325	0	0	0	0	0	0
mmu_circ_001664	chr1_4047837_4048042_R	ciRNA	Yes	chr1	4047837	4048042	-	205	205	1	0	205	4047837	4048042	ENSMMUT00000031689	chr1:4047814-4048042	0	0	0	0	1	0	0	1	0	0	0	0	0	0	0	1	0	0	0	0	0	0	1	0	0	0	0	0	0	0	0	0	0
mmu_circ_001666	chr1_40736998_40740227_R	circRNA	Yes	chr1	40736998	40740227	-	327	3229	3	0,745,3115	128,85,114	40736998,40737743,40740113	40737126,40737828,40740227	PREDICTED.877.1	chr1:40735570-40736998|chr1:40740227-40745001	0	0	0	1	0	0	0	0	0	0	0	0	0	0	0	0	0	0	1	0	0	0	0	0	0.613597	0	0	0	0	0	0	0	0
mmu_circ_001669	chr1_40747985_40753182_R	circRNA	Yes	chr1	40747985	40753182	-	357	5197	3	0,3015,5087	111,136,110	40747985,40751000,40753072	40748096,40751136,40753182	PREDICTED.1325.1	chr1:40746228-40747985|chr1:40753182-40756135	0	0	0	0	0	0	0	0	0	0	0	0	0	0	1	0	1	0	0	0	0	0	0	0	0	0	0	0	0	0	0	0	0
mmu_circ_001671	chr1_40853328_40855249_R	circRNA	Yes	chr1	40853328	40855249	-	387	1921	6	0,271,748,1188,1736,1867	108,68,69,40,48,54	40853328,40853599,40854076,40854516,40855064,40855195	40853436,40853667,40854145,40854556,40855112,40855249	PREDICTED.1268.1	chr1:40846925-40853328|chr1:40855249-40855826	1	0	0	1	0	0	0	0	0	0	0	0	0	0	0	0	0	0	0	0	0	0	0	0	0	1.04496	0	0	0	0	0	0	0
mmu_circ_001674	chr1_42179913_42181348_F	circRNA	Yes*	chr1	42179913	42181348	+	481	1435	3	0,676,1265	127,184,170	42179913,42180589,42181178	42180040,42180773,42181348	PREDICTED.842.4	chr1:42173673-42179913|chr1:42181348-42185826	0	0	0	0	0	0	0	0	0	0	0	0	0	0	1	0	0	0	0	0	0	0	0	0	0	0	0	0	0	0	0	0	0
mmu_circ_001676	chr1_42221580_42230744_F	circRNA	Yes*	chr1	42221580	42230744	+	1279	9164	5	0,2555,7274,8586,9040	234,225,519,177,124	42221580,42224135,42228854,42230166,42230620	42221814,42224360,42229373,42230343,42230744	PREDICTED.1485.2	chr1:42220412-42221580|chr1:42230744-42232202	0	0	0	0	0	0	0	0	0	0	0	0	0	0	0	0	0	0	0	0	1	0	0	0	0	0	0	0	0	0	0	0	0
mmu_circ_001678	chr1_42306784_42307677_F	ciRNA	Yes	chr1	42306784	42307677	+	893	893	1	0	893	42306784	42307677	PREDICTED.776.3	chr1:42306784-42307701	0	0	0	0	0	0	0	0	0	0	0	0	0	0	0	2	0	0	0	0	0	0	0	0	0	0	0	0	0	0	0	0	0
mmu_circ_001679	chr1_42311473_42311700_F	circRNA	Yes	chr1	42311473	42311700	+	227	227	1	0	227	42311473	42311700	PREDICTED.898.3	chr1:42310207-42311473|chr1:42311700-42312762	0	0	0	0	0	2	0	0	1	0	0	0	0	3	1	0	0	0	0	0	0	0	0	0	0	0	0	0	0	0	0	0	0
mmu_circ_001680	chr1_42334612_42341446_F	circRNA	Yes*	chr1	42334612	42341446	+	366	6834	3	0,2026,6698	155,75,136	42334612,42336638,42341310	42334767,42336713,42341446	PREDICTED.776.3	chr1:42333568-42334612|chr1:42341446-42354061	0	0	0	0	0	0	0	0	0	0	0	0	0	0	0	1	0	0	0	0	0	0	0	0	0	0	0	0	0	0	0	0	0
mmu_circ_001681	chr1_42412208_42416289_R	circRNA	Yes	chr1	42412208	42416289	-	268	4081	2	0,3996	183,85	42412208,42416204	42412391,42416289	PREDICTED.1380.2	chr1:42397192-42412208|chr1:42416289-42419261	2	0	0	0	0	0	0	0	0	0	0	0	0	0	0	0	0	0	0	0	0	0	0	0	0	2.08991	0	0	0	0	0	0	0
mmu_circ_001682	chr1_42412208_42419414_R	circRNA	Yes*	chr1	42412208	42419414	-	336	7206	2	0,7053	183,153	42412208,42419261	42412391,42419414	PREDICTED.1519.1	chr1:42394626-42412208|chr1:42419414-42424721	0	0	0	0	0	0	1	0	0	0	0	0	0	0	0	0	0	0	0	0	0	0	0	0	0	0	0.990325	0	0	0	0	0	0
mmu_circ_001683	chr1_42412208_42424765_R	circRNA	Yes	chr1	42412208	42424765	-	521	12557	5	0,3996,5834,7053,12513	183,85,56,153,44	42412208,42416204,42418042,42419261,42424721	42412391,42416289,42418098,42419414,42424765	PREDICTED.1095.1	chr1:42395942-42412208|chr1:42424765-42427269	0	0	0	0	0	0	0	0	0	0	0	0	0	0	0	0	0	2	0	0	0	0	0	0	0	0	0	0	0	0	0	0	1.41057
mmu_circ_001684	chr1_42416204_42419414_R	circRNA	Yes	chr1	42416204	42419414	-	238	3210	2	0,3057	85,153	42416204,42419261	42416289,42419414	PREDICTED.1281.1	chr1:42412391-42416204|chr1:42419414-42424721	0	0	0	1	0	0	0	0	0	0	0	0	0	0	0	0	0	0	0	0	2	0	0	0	0	0	0	0	0	0	0	0	0
mmu_circ_001685	chr1_42416204_42424765_R	circRNA	Yes	chr1	42416204	42424765	-	282	8561	3	0,3057,8517	85,153,44	42416204,42419261,42424721	42416289,42419414,42424765	PREDICTED.1292.1	chr1:42412391-42416204|chr1:42424765-42427269	0	0	0	3	0	0	0	0	0	0	0	0	9	0	0	0	0	0	0	0	0	0	0	0	0	0	0	6.19711	0	0	0	0	0
mmu_circ_001686	chr1_42416204_42424765_R	circRNA	Yes	chr1	42416204	42424765	-	338	8561	4	0,1838,3057,8517	85,56,153,44	42416204,42418042,42419261,42424721	42416289,42418098,42419414,42424765	PREDICTED.1095.1	chr1:42412391-42416204|chr1:42424765-42427269	0	0	0	0	0	0	0	0	0	0	0	0	0	0	0	0	0	4	0	0	0	0	0	0	0	0	0	0	0	0	0	0	2.82115
mmu_circ_001689	chr1_42622114_42622821_F	circRNA	Yes	chr1	42622114	42622821	+	349	707	2	0,606	248,101	42622114,42622720	42622362,42622821	PREDICTED.1348.1	chr1:42620858-42622114|chr1:42622821-42624261	0	0	0	0	0	0	0	0	0	0	0	0	0	0	0	0	2	0	0	0	0	0	0	0	0	0	0	0	0	0	0	0	0
mmu_circ_001690	chr1_42622114_42622821_F	circRNA	Yes	chr1	42622114	42622821	+	183	707	2	0,606	82,101	42622114,42622720	42622196,42622821	ENSMMUT00000026526	chr1:42620858-42622114|chr1:42622821-42624261	2	0	0	5	1	0	1	0	0	0	0	0	1	1	4	0	0	0	0	0	0	0	0	0	0	2.08991	0.990325	0.688568	0	0	0	0	0
mmu_circ_001691	chr1_42717227_42720642_R	circRNA	Yes	chr1	42717227	42720642	-	240	3415	2	0,3274	99,141	42717227,42720501	42717326,42720642	PREDICTED.874.2	chr1:42716133-42717227|chr1:42720642-42752162	0	0	0	0	0	0	0	0	0	0	0	0	0	0	2	0	0	0	0	0	0	0	0	0	0	0	0	0	0	0	0	0	0
mmu_circ_001692	chr1_42717227_42720642_R	circRNA	Yes	chr1	42717227	42720642	-	248	3415	3	0,3212,3248	77,4,167	42717227,42720439,42720475	42717304,42720443,42720642	PREDICTED.1562.10	chr1:42716133-42717227|chr1:42720642-42752162	0	0	0	0	0	0	2	0	0	0	0	0	0	0	0	0	0	0	0	0	0	0	0	0	0	0	1.98065	0	0	0	0	0	0
mmu_circ_001694	chr1_4296699_4297391_R	circRNA	Yes	chr1	4296699	4297391	-	251	692	2	0,555	114,137	4296699,4297254	4296813,4297391	ENSMMUT00000027418	chr1:4292299-4296699|chr1:4297391-4301625	0	1	0	0	0	0	1	0	1	0	2	0	0	0	3	1	8	0	0	0	0	0	0	0	0	0	0.990325	0	1.55173	0	0	0	0
mmu_circ_001695	chr1_43073644_43079652_F	circRNA	Yes	chr1	43073644	43079652	+	370	6008	5	0,191,310,5779,5875	155,8,55,19,133	43073644,43073835,43073954,43079423,43079519	43073799,43073843,43074009,43079442,43079652	PREDICTED.1405.1	chr1:43045444-43073644|chr1:43079652-43086105	0	0	0	0	0	0	0	1	0	0	0	0	0	0	0	0	0	0	1	0	0	0	0	0	0.613597	0	0	0	0	0	0	0	0
mmu_circ_001696	chr1_43073644_43086309_F	circRNA	Yes	chr1	43073644	43086309	+	574	12665	6	0,191,310,5779,5875,12461	155,8,55,19,133,204	43073644,43073835,43073954,43079423,43079519,43086105	43073799,43073843,43074009,43079442,43079652,43086309	PREDICTED.1405.1	chr1:43045444-43073644|chr1:43086309-43107259	0	1	0	0	0	0	0	2	0	0	0	0	0	0	0	0	4	0	0	0	0	0	0	0	0	0	0	0	1.55173	0	0	0	0
mmu_circ_001698	chr1_43155917_43160301_F	circRNA	Yes*	chr1	43155917	43160301	+	499	4384	4	0,627,2190,4242	87,117,153,142	43155917,43156544,43158107,43160159	43156004,43156661,43158260,43160301	PREDICTED.2118.3	chr1:43148544-43155917|chr1:43160301-43170532	0	0	0	0	0	0	0	0	0	0	0	0	1	0	0	0	0	0	0	0	0	0	0	0	0	0	0	0.688568	0	0	0	0	0
mmu_circ_001699	chr1_43170532_43189995_F	circRNA	Yes	chr1	43170532	43189995	+	434	19463	3	0,14380,19319	185,105,144	43170532,43184912,43189851	43170717,43185017,43189995	PREDICTED.693.2	chr1:43160301-43170532|chr1:43189995-43191424	0	0	0	0	0	0	0	1	1	0	1	0	0	0	0	0	0	0	0	0	0	0	0	1	0	0	0	0	0	0	0	0.401374	0
mmu_circ_001701	chr1_43620086_43634844_F	circRNA	Yes	chr1	43620086	43634844	+	395	14758	4	0,8728,10804,14662	113,72,114,96	43620086,43628814,43630890,43634748	43620199,43628886,43631004,43634844	PREDICTED.1328.2	chr1:43572330-43620086|chr1:43634844-43639746	0	0	0	0	0	0	0	0	0	0	0	0	0	0	1	0	0	0	0	0	1	0	0	0	0	0	0	0	0	0	0	0	0
mmu_circ_001702	chr1_43620086_43639920_F	circRNA	Yes*	chr1	43620086	43639920	+	569	19834	5	0,8728,10804,14662,19660	113,72,114,96,174	43620086,43628814,43630890,43634748,43639746	43620199,43628886,43631004,43634844,43639920	PREDICTED.707.1	chr1:43572330-43620086|chr1:43639920-43644167	0	0	1	0	0	0	0	0	0	0	0	0	0	0	0	0	0	0	0	0	0	0	0	0	0	0	0	0	0	0.993085	0	0	0
mmu_circ_001705	chr1_43628814_43634844_F	circRNA	Yes	chr1	43628814	43634844	+	282	6030	3	0,2076,5934	72,114,96	43628814,43630890,43634748	43628886,43631004,43634844	PREDICTED.1328.2	chr1:43620199-43628814|chr1:43634844-43639746	0	0	0	0	0	1	0	0	0	0	0	0	1	0	0	0	0	0	0	0	0	0	0	0	0	0	0	0.688568	0	0	0	0	0
mmu_circ_001709	chr1_43961735_43966546_R	circRNA	Yes	chr1	43961735	43966546	-	360	4811	2	0,4578	127,233	43961735,43966313	43961862,43966546	ENSMMUT00000047355	chr1:43940688-43961735|chr1:43966546-44027531	7	5	0	7	10	2	7	4	3	6	0	6	16	7	16	12	13	11	3	4	4	0	3	3	1.84079	7.31469	6.93227	11.0171	7.75863	0	0	1.20412	7.75816
mmu_circ_001717	chr1_45099479_45106833_R	circRNA	Yes	chr1	45099479	45106833	-	231	7354	2	0,7252	129,102	45099479,45106731	45099608,45106833	PREDICTED.1430.1	chr1:45095461-45099479|chr1:45106833-45128513	0	0	0	0	2	0	0	0	0	0	0	0	0	0	0	0	0	0	0	0	0	0	0	0	0	0	0	0	0	0	0	0	0
mmu_circ_001718	chr1_45158140_45170381_R	circRNA	Yes	chr1	45158140	45170381	-	400	12241	2	0,11916	75,325	45158140,45170056	45158215,45170381	PREDICTED.1430.2	chr1:45128597-45158140|chr1:45170381-45204525	0	0	2	0	2	0	0	0	0	0	0	2	0	2	6	1	0	1	2	0	0	0	0	0	1.22719	0	0	0	0	1.98617	0	0	0.705287
mmu_circ_001719	chr1_45158140_45170493_R	circRNA	Yes	chr1	45158140	45170493	-	512	12353	2	0,11916	75,437	45158140,45170056	45158215,45170493	PREDICTED.1458.1	chr1:45128597-45158140|chr1:45170493-45204525	0	0	0	0	0	0	0	0	0	0	0	1	0	0	0	0	2	6	0	0	0	0	0	0	0	0	0	0	0	0	0	0	4.23172
mmu_circ_001738	chr1_4719377_4722205_R	circRNA	Yes	chr1	4719377	4722205	-	240	2828	2	0,2704	116,124	4719377,4722081	4719493,4722205	PREDICTED.214.3	chr1:4718161-4719377|chr1:4722205-4723158	2	0	0	0	0	0	0	0	0	0	0	0	0	0	0	0	0	0	0	0	0	0	0	0	0	2.08991	0	0	0	0	0	0	0
mmu_circ_001739	chr1_47210124_47244981_R	circRNA	Yes	chr1	47210124	47244981	-	342	34857	4	0,23731,28317,34740	73,92,60,117	47210124,47233855,47238441,47244864	47210197,47233947,47238501,47244981	ENSMMUT00000047306	chr1:47172737-47210124|chr1:47244981-47247949	1	0	0	0	1	0	0	1	0	0	0	1	1	0	0	1	0	0	0	0	0	0	0	0	0	1.04496	0	0.688568	0	0	0	0	0
mmu_circ_001740	chr1_47210124_47264723_R	circRNA	Yes	chr1	47210124	47264723	-	620	54599	5	0,23731,28317,34740,54321	73,92,60,117,278	47210124,47233855,47238441,47244864,47264445	47210197,47233947,47238501,47244981,47264723	ENSMMUT00000016325	chr1:47172737-47210124|chr1:47264723-47278462	2	0	1	1	0	0	2	0	0	0	0	0	0	0	1	1	0	0	0	0	0	0	0	0	0	2.08991	1.98065	0	0	0.993085	0	0	0
mmu_circ_001742	chr1_47233855_47244981_R	circRNA	Yes	chr1	47233855	47244981	-	269	11126	3	0,4586,11009	92,60,117	47233855,47238441,47244864	47233947,47238501,47244981	ENSMMUT00000047306	chr1:47210197-47233855|chr1:47244981-47247949	0	0	0	0	0	0	0	0	0	0	0	0	0	1	0	1	0	0	0	0	0	0	0	0	0	0	0	0	0	0	0	0	0
mmu_circ_001743	chr1_47233855_47264723_R	circRNA	Yes	chr1	47233855	47264723	-	547	30868	4	0,4586,11009,30590	92,60,117,278	47233855,47238441,47244864,47264445	47233947,47238501,47244981,47264723	ENSMMUT00000047304	chr1:47210197-47233855|chr1:47264723-47280503	1	1	0	0	1	0	3	1	1	0	0	0	1	3	1	0	5	0	0	0	0	0	0	0	0	1.04496	2.97097	0.688568	1.55173	0	0	0	0
mmu_circ_001747	chr1_47784901_47817214_R	circRNA	Yes	chr1	47784901	47817214	-	740	32313	6	0,10679,11379,14096,15588,32223	104,149,78,191,128,90	47784901,47795580,47796280,47798997,47800489,47817124	47785005,47795729,47796358,47799188,47800617,47817214	ENSMMUT00000007520	chr1:47780782-47784901|chr1:47817214-47854459	0	0	0	0	0	0	0	0	0	0	0	0	1	0	0	0	0	0	1	0	0	0	0	0	0.613597	0	0	0.688568	0	0	0	0	0
mmu_circ_001748	chr1_47795580_47800617_R	circRNA	Yes*	chr1	47795580	47800617	-	546	5037	4	0,700,3417,4909	149,78,191,128	47795580,47796280,47798997,47800489	47795729,47796358,47799188,47800617	ENSMMUT00000007520	chr1:47785005-47795580|chr1:47800617-47817124	0	0	0	0	0	0	0	0	0	0	0	0	1	0	0	0	0	0	0	0	0	0	0	0	0	0	0	0.688568	0	0	0	0	0
mmu_circ_001750	chr1_47795580_47817214_R	circRNA	Yes	chr1	47795580	47817214	-	636	21634	5	0,700,3417,4909,21544	149,78,191,128,90	47795580,47796280,47798997,47800489,47817124	47795729,47796358,47799188,47800617,47817214	ENSMMUT00000007520	chr1:47785005-47795580|chr1:47817214-47854459	0	0	0	0	0	0	0	0	0	0	0	0	0	0	0	0	1	1	2	0	0	0	0	0	1.22719	0	0	0	0	0	0	0	0.705287
mmu_circ_001752	chr1_47854459_47868914_R	circRNA	Yes	chr1	47854459	47868914	-	272	14455	2	0,14295	112,160	47854459,47868754	47854571,47868914	ENSMMUT00000007520	chr1:47817214-47854459|chr1:47868914-47909103	0	0	0	0	0	0	1	0	0	0	0	0	0	0	1	0	0	1	0	0	0	0	1	0	0	0	0.990325	0	0	0	0	0	0.705287
mmu_circ_001753	chr1_47868754_47868914_R	circRNA	Yes	chr1	47868754	47868914	-	160	160	1	0	160	47868754	47868914	PREDICTED.689.2	chr1:47854571-47868754|chr1:47868914-47900929	0	0	0	0	0	0	0	0	0	0	0	0	0	0	0	0	0	0	0	2	0	0	0	0	0	0	0	0	0	0	0	0	0
mmu_circ_001760	chr1_4833948_4846423_R	circRNA	Yes	chr1	4833948	4846423	-	334	12475	3	0,2376,12368	163,64,107	4833948,4836324,4846316	4834111,4836388,4846423	ENSMMUT00000002674	chr1:4822038-4833948|chr1:4846423-4848707	3	0	0	0	2	1	1	3	0	2	0	0	1	0	1	1	3	3	2	0	0	0	0	0	1.22719	3.13487	0.990325	0.688568	0	0	0	0	2.11586
mmu_circ_001761	chr1_4833948_4848746_R	circRNA	Yes	chr1	4833948	4848746	-	373	14798	4	0,2376,12368,14759	163,64,107,39	4833948,4836324,4846316,4848707	4834111,4836388,4846423,4848746	ENSMMUT00000002674	chr1:4822038-4833948|chr1:4848746-4856078	0	0	0	2	0	0	0	2	2	0	0	0	0	1	0	0	0	1	0	0	0	0	0	1	0	0	0	0	0	0	0	0.401374	0.705287
mmu_circ_001762	chr1_4833948_4856181_R	circRNA	Yes	chr1	4833948	4856181	-	476	22233	5	0,2376,12368,14759,22130	163,64,107,39,103	4833948,4836324,4846316,4848707,4856078	4834111,4836388,4846423,4848746,4856181	ENSMMUT00000002674	chr1:4822038-4833948|chr1:4856181-4871147	1	0	0	0	0	0	0	0	0	0	0	0	0	2	1	0	1	0	0	0	0	0	0	0	0	1.04496	0	0	0	0	0	0	0
mmu_circ_001763	chr1_4846316_4856181_R	circRNA	Yes	chr1	4846316	4856181	-	249	9865	3	0,2391,9762	107,39,103	4846316,4848707,4856078	4846423,4848746,4856181	ENSMMUT00000002674	chr1:4836388-4846316|chr1:4856181-4871147	1	2	1	1	0	0	3	0	2	0	1	0	1	2	5	1	5	2	1	0	2	1	0	0	0.613597	1.04496	2.97097	0.688568	3.10345	0.993085	0.430566	0	1.41057
mmu_circ_001765	chr1_48521491_48523732_F	circRNA	Yes	chr1	48521491	48523732	+	573	2241	5	0,196,901,1191,2184	86,74,189,167,57	48521491,48521687,48522392,48522682,48523675	48521577,48521761,48522581,48522849,48523732	ENSMMUT00000047263	chr1:48520350-48521491|chr1:48523732-48524282	1	2	0	0	0	0	4	0	0	0	0	0	0	0	3	1	0	0	0	0	0	0	0	0	0	1.04496	3.9613	0	3.10345	0	0	0	0
mmu_circ_001769	chr1_48548455_48549928_R	circRNA	Yes	chr1	48548455	48549928	-	267	1473	2	0,1400	194,73	48548455,48549855	48548649,48549928	ENSMMUT00000047252	chr1:48541771-48548455|chr1:48549928-48563026	3	0	2	0	4	0	0	0	0	6	0	2	3	0	11	9	8	1	1	0	0	1	0	1	0.613597	3.13487	0	2.0657	0	1.98617	0.430566	0.401374	0.705287
mmu_circ_001772	chr1_48568071_48570279_R	circRNA	Yes	chr1	48568071	48570279	-	1166	2208	2	0,1157	115,1051	48568071,48569228	48568186,48570279	ENSMMUT00000047252	chr1:48563803-48568071|chr1:48570279-48594179	0	0	0	0	0	0	0	0	1	0	0	0	1	0	3	3	1	2	0	1	0	0	0	0	0	0	0	0.688568	0	0	0	0	1.41057
mmu_circ_001776	chr1_48624383_48627006_R	circRNA	Yes*	chr1	48624383	48627006	-	261	2623	2	0,2485	123,138	48624383,48626868	48624506,48627006	ENSMMUT00000002577	chr1:48621619-48624383|chr1:48627006-48634046	0	0	0	0	0	0	0	0	0	1	0	0	0	0	0	0	0	0	0	0	0	0	0	0	0	0	0	0	0	0	0	0	0
mmu_circ_001777	chr1_48856424_48897616_F	circRNA	Yes	chr1	48856424	48897616	+	287	41192	2	0,41100	195,92	48856424,48897524	48856619,48897616	PREDICTED.4359.4	chr1:48852998-48856424|chr1:48897616-48932440	0	0	0	1	0	0	3	2	0	0	2	0	0	0	0	1	0	0	0	0	1	0	0	1	0	0	2.97097	0	0	0	0	0.401374	0
mmu_circ_001778	chr1_48897524_48945731_F	circRNA	Yes	chr1	48897524	48945731	+	688	48207	6	0,34916,39658,43500,45590,47997	92,76,79,155,76,210	48897524,48932440,48937182,48941024,48943114,48945521	48897616,48932516,48937261,48941179,48943190,48945731	ENSMMUT00000021572	chr1:48821572-48897524|chr1:48945731-48951440	0	0	0	0	0	0	0	0	0	0	0	0	0	0	1	1	0	0	0	0	0	0	0	0	0	0	0	0	0	0	0	0	0
mmu_circ_001780	chr1_48932440_48945731_F	circRNA	Yes*	chr1	48932440	48945731	+	596	13291	5	0,4742,8584,10674,13081	76,79,155,76,210	48932440,48937182,48941024,48943114,48945521	48932516,48937261,48941179,48943190,48945731	ENSMMUT00000021572	chr1:48897616-48932440|chr1:48945731-48951440	0	0	0	0	0	0	0	0	0	0	0	0	0	0	1	0	0	0	0	0	0	0	0	0	0	0	0	0	0	0	0	0	0
mmu_circ_001787	chr1_48954801_48955038_F	ciRNA	Yes	chr1	48954801	48955038	+	237	237	1	0	237	48954801	48955038	PREDICTED.1833.4	chr1:48954801-48955060	1	0	0	0	0	0	0	2	0	0	0	0	0	0	0	0	0	0	0	0	0	0	0	0	0	1.04496	0	0	0	0	0	0	0
mmu_circ_001789	chr1_48954801_48955041_F	ciRNA	Yes	chr1	48954801	48955041	+	240	240	1	0	240	48954801	48955041	PREDICTED.2727.4	chr1:48954801-48955060	0	1	0	1	1	0	0	2	5	0	0	0	0	1	0	1	0	5	0	0	0	1	2	0	0	0	0	0	1.55173	0	0.430566	0	3.52644
mmu_circ_001792	chr1_48977955_49017086_R	circRNA	Yes*	chr1	48977955	49017086	-	1081	39131	8	0,637,12167,18228,23066,23934,35368,39022	171,75,177,143,126,181,99,109	48977955,48978592,48990122,48996183,49001021,49001889,49013323,49016977	48978126,48978667,48990299,48996326,49001147,49002070,49013422,49017086	ENSMMUT00000047240	chr1:48975944-48977955|chr1:49017086-49069234	0	0	0	0	0	0	0	0	0	0	0	0	0	0	0	0	1	0	0	0	0	0	0	0	0	0	0	0	0	0	0	0	0
mmu_circ_001793	chr1_49013323_49017086_R	circRNA	Yes	chr1	49013323	49017086	-	208	3763	2	0,3654	99,109	49013323,49016977	49013422,49017086	ENSMMUT00000047240	chr1:49002070-49013323|chr1:49017086-49069234	4	2	1	1	3	1	1	5	4	0	2	2	1	1	6	0	8	3	2	1	0	1	1	1	1.22719	4.17982	0.990325	0.688568	3.10345	0.993085	0.430566	0.401374	2.11586
mmu_circ_001794	chr1_49286749_49292514_F	circRNA	Yes	chr1	49286749	49292514	+	316	5765	2	0,5604	155,161	49286749,49292353	49286904,49292514	PREDICTED.2942.1	chr1:49284585-49286749|chr1:49292514-49300518	0	0	0	0	0	0	1	0	0	0	0	0	0	0	0	1	0	0	0	0	0	0	0	0	0	0	0.990325	0	0	0	0	0	0
mmu_circ_001798	chr1_49609070_49620958_R	circRNA	Yes	chr1	49609070	49620958	-	832	11888	7	0,1191,3481,5047,6277,8493,11789	126,112,87,192,105,111,99	49609070,49610261,49612551,49614117,49615347,49617563,49620859	49609196,49610373,49612638,49614309,49615452,49617674,49620958	ENSMMUT00000006875	chr1:49604427-49609070|chr1:49620958-49632531	0	0	0	0	0	0	0	0	0	0	0	2	0	0	0	0	0	0	0	0	0	0	0	0	0	0	0	0	0	0	0	0	0
mmu_circ_001801	chr1_50187108_50192824_F	circRNA	Yes	chr1	50187108	50192824	+	300	5716	2	0,5563	147,153	50187108,50192671	50187255,50192824	ENSMMUT00000024433	chr1:50154191-50187108|chr1:50192824-50194688	0	0	0	0	0	0	0	0	0	0	0	1	0	0	1	1	0	0	0	0	0	0	0	0	0	0	0	0	0	0	0	0	0
mmu_circ_001802	chr1_50192671_50195070_F	circRNA	Yes	chr1	50192671	50195070	+	327	2399	3	0,2017,2302	153,77,97	50192671,50194688,50194973	50192824,50194765,50195070	ENSMMUT00000024433	chr1:50187255-50192671|chr1:50195070-50196735	1	1	0	0	0	0	0	0	0	0	0	0	0	0	0	0	1	0	0	0	1	0	0	0	0	1.04496	0	0	1.55173	0	0	0	0
mmu_circ_001803	chr1_50194688_50195070_F	circRNA	Yes	chr1	50194688	50195070	+	174	382	2	0,285	77,97	50194688,50194973	50194765,50195070	ENSMMUT00000024433	chr1:50192824-50194688|chr1:50195070-50196735	0	0	0	0	2	0	0	4	2	0	0	0	0	1	3	0	0	1	0	0	0	0	0	0	0	0	0	0	0	0	0	0	0.705287
mmu_circ_001806	chr1_51271939_51286917_R	circRNA	Yes*	chr1	51271939	51286917	-	423	14978	3	0,9959,14684	41,88,294	51271939,51281898,51286623	51271980,51281986,51286917	PREDICTED.1729.2	chr1:51255447-51271939|chr1:51286917-51291335	1	0	0	0	0	0	0	0	0	0	0	0	0	0	0	0	0	0	0	0	0	0	0	0	0	1.04496	0	0	0	0	0	0	0
mmu_circ_001807	chr1_51271939_51291416_R	circRNA	Yes	chr1	51271939	51291416	-	504	19477	4	0,9959,14684,19396	41,88,294,81	51271939,51281898,51286623,51291335	51271980,51281986,51286917,51291416	ENSMMUT00000012971	chr1:51255447-51271939|chr1:51291416-51299297	0	0	0	0	0	0	2	0	0	0	0	0	0	0	0	0	0	0	0	0	0	0	0	0	0	0	1.98065	0	0	0	0	0	0
mmu_circ_001808	chr1_51281898_51286917_R	circRNA	Yes	chr1	51281898	51286917	-	382	5019	2	0,4725	88,294	51281898,51286623	51281986,51286917	ENSMMUT00000012971	chr1:51271980-51281898|chr1:51286917-51291335	0	0	0	1	0	0	1	1	0	0	0	0	0	1	1	0	0	0	0	0	1	0	0	0	0	0	0.990325	0	0	0	0	0	0
mmu_circ_001809	chr1_53302022_53359518_R	circRNA	Yes*	chr1	53302022	53359518	-	464	57496	4	0,14756,15900,57407	216,78,81,89	53302022,53316778,53317922,53359429	53302238,53316856,53318003,53359518	PREDICTED.1145.2	chr1:53269741-53302022|chr1:53359518-53363646	0	0	0	0	0	0	0	0	0	0	0	0	0	1	0	0	0	0	0	0	0	0	0	0	0	0	0	0	0	0	0	0	0
mmu_circ_001810	chr1_53316778_53359518_R	circRNA	Yes	chr1	53316778	53359518	-	248	42740	3	0,1144,42651	78,81,89	53316778,53317922,53359429	53316856,53318003,53359518	ENSMMUT00000026775	chr1:53302238-53316778|chr1:53359518-53363646	0	0	0	1	1	0	2	0	0	0	0	0	0	0	0	1	1	2	1	0	2	0	0	0	0.613597	0	1.98065	0	0	0	0	0	1.41057
mmu_circ_001811	chr1_53359429_53420342_R	circRNA	Yes	chr1	53359429	53420342	-	750	60913	7	0,4217,32122,47815,48847,49892,60817	89,137,155,82,64,127,96	53359429,53363646,53391551,53407244,53408276,53409321,53420246	53359518,53363783,53391706,53407326,53408340,53409448,53420342	PREDICTED.1145.2	chr1:53318003-53359429|chr1:53420342-53479666	0	0	0	0	0	0	0	0	1	0	0	0	0	0	1	0	0	0	0	1	0	0	0	0	0	0	0	0	0	0	0	0	0
mmu_circ_001812	chr1_53391551_53420342_R	circRNA	Yes	chr1	53391551	53420342	-	524	28791	5	0,15693,16725,17770,28695	155,82,64,127,96	53391551,53407244,53408276,53409321,53420246	53391706,53407326,53408340,53409448,53420342	PREDICTED.1145.2	chr1:53363783-53391551|chr1:53420342-53479666	0	0	0	0	0	0	0	0	0	0	0	0	0	0	1	0	0	1	0	1	0	1	0	0	0	0	0	0	0	0	0.430566	0	0.705287
mmu_circ_001813	chr1_53407244_53420342_R	circRNA	Yes	chr1	53407244	53420342	-	369	13098	4	0,1032,2077,13002	82,64,127,96	53407244,53408276,53409321,53420246	53407326,53408340,53409448,53420342	PREDICTED.1769.4	chr1:53391706-53407244|chr1:53420342-53479666	0	0	0	0	0	0	0	0	0	0	0	0	0	0	0	0	3	0	0	0	0	0	0	0	0	0	0	0	0	0	0	0	0
mmu_circ_001814	chr1_53603387_53617008_R	circRNA	Yes	chr1	53603387	53617008	-	253	13621	2	0,13574	206,47	53603387,53616961	53603593,53617008	ENSMMUT00000026775	chr1:53568203-53603387|chr1:53617008-53672945	0	0	0	0	0	0	0	0	0	0	0	0	0	0	1	0	2	0	0	0	1	0	0	0	0	0	0	0	0	0	0	0	0
mmu_circ_001815	chr1_53603387_53673014_R	circRNA	Yes	chr1	53603387	53673014	-	322	69627	3	0,13574,69558	206,47,69	53603387,53616961,53672945	53603593,53617008,53673014	PREDICTED.1145.2	chr1:53568203-53603387|chr1:53673014-53780107	0	0	0	0	0	0	0	0	0	0	0	0	0	0	3	0	0	0	0	0	0	0	0	0	0	0	0	0	0	0	0	0	0
mmu_circ_001821	chr1_54207609_54263685_R	circRNA	Yes	chr1	54207609	54263685	-	1558	56076	13	0,4693,6596,8103,9089,11537,13878,15277,28920,48648,52818,54891,55986	67,134,36,91,114,204,198,162,73,86,157,146,90	54207609,54212302,54214205,54215712,54216698,54219146,54221487,54222886,54236529,54256257,54260427,54262500,54263595	54207676,54212436,54214241,54215803,54216812,54219350,54221685,54223048,54236602,54256343,54260584,54262646,54263685	ENSMMUT00000016881	chr1:54191637-54207609|chr1:54263685-54281228	0	0	0	0	0	0	1	0	0	0	0	1	0	2	0	0	0	0	0	0	0	0	0	0	0	0	0.990325	0	0	0	0	0	0
mmu_circ_001825	chr1_54215712_54286711_R	circRNA	Yes	chr1	54215712	54286711	-	1681	70999	13	0,986,3434,5775,7174,20817,40545,44715,46788,47772,65516,68086,70929	91,114,204,198,162,73,86,157,146,201,60,119,70	54215712,54216698,54219146,54221487,54222886,54236529,54256257,54260427,54262500,54263484,54281228,54283798,54286641	54215803,54216812,54219350,54221685,54223048,54236602,54256343,54260584,54262646,54263685,54281288,54283917,54286711	PREDICTED.790.2	chr1:54214241-54215712|chr1:54286711-54290176	0	0	0	0	0	1	0	0	0	0	0	0	1	0	0	0	0	0	0	0	0	0	0	0	0	0	0	0.688568	0	0	0	0	0
mmu_circ_001826	chr1_54215712_54286711_R	circRNA	Yes	chr1	54215712	54286711	-	1570	70999	13	0,986,3434,5775,7174,20817,40545,44715,46788,47883,65516,68086,70929	91,114,204,198,162,73,86,157,146,90,60,119,70	54215712,54216698,54219146,54221487,54222886,54236529,54256257,54260427,54262500,54263595,54281228,54283798,54286641	54215803,54216812,54219350,54221685,54223048,54236602,54256343,54260584,54262646,54263685,54281288,54283917,54286711	ENSMMUT00000016881	chr1:54214241-54215712|chr1:54286711-54290176	0	0	0	0	2	0	0	0	0	0	0	1	0	0	0	0	0	0	0	0	0	0	0	0	0	0	0	0	0	0	0	0	0
mmu_circ_001827	chr1_54216698_54219350_R	circRNA	Yes	chr1	54216698	54219350	-	318	2652	2	0,2448	114,204	54216698,54219146	54216812,54219350	ENSMMUT00000016881	chr1:54215803-54216698|chr1:54219350-54221487	0	0	0	2	0	0	1	0	0	0	0	0	0	0	0	0	1	0	0	2	0	1	0	0	0	0	0.990325	0	0	0	0.430566	0	0
mmu_circ_001828	chr1_54219146_54219350_R	circRNA	Yes	chr1	54219146	54219350	-	204	204	1	0	204	54219146	54219350	PREDICTED.2714.1	chr1:54216812-54219146|chr1:54219350-54221487	0	0	0	0	1	0	0	0	0	0	0	0	0	0	1	0	0	0	0	0	0	0	0	0	0	0	0	0	0	0	0	0	0
mmu_circ_001830	chr1_54236529_54263685_R	circRNA	Yes*	chr1	54236529	54263685	-	552	27156	5	0,19728,23898,25971,27066	73,86,157,146,90	54236529,54256257,54260427,54262500,54263595	54236602,54256343,54260584,54262646,54263685	PREDICTED.1763.5	chr1:54223048-54236529|chr1:54263685-54281228	1	0	0	0	0	0	0	0	0	0	0	0	0	0	0	0	0	0	0	0	0	0	0	0	0	1.04496	0	0	0	0	0	0	0
mmu_circ_001833	chr1_54281228_54286711_R	circRNA	Yes	chr1	54281228	54286711	-	249	5483	3	0,2570,5413	60,119,70	54281228,54283798,54286641	54281288,54283917,54286711	PREDICTED.1763.2	chr1:54262646-54281228|chr1:54286711-54290176	1	0	0	0	0	0	0	0	0	0	0	0	0	0	7	0	0	0	0	0	0	0	0	0	0	1.04496	0	0	0	0	0	0	0
mmu_circ_001836	chr1_54564184_54568885_F	circRNA	Yes	chr1	54564184	54568885	+	225	4701	4	0,1194,2869,4650	96,48,30,51	54564184,54565378,54567053,54568834	54564280,54565426,54567083,54568885	ENSMMUT00000047173	chr1:54532888-54564184|chr1:54568885-54580158	0	1	0	0	0	0	0	0	0	0	0	1	0	0	1	0	0	0	0	0	0	0	0	0	0	0	0	0	1.55173	0	0	0	0
mmu_circ_001837	chr1_54564184_54581456_F	circRNA	Yes	chr1	54564184	54581456	+	421	17272	6	0,1194,2869,4650,15974,17167	96,48,30,51,91,105	54564184,54565378,54567053,54568834,54580158,54581351	54564280,54565426,54567083,54568885,54580249,54581456	ENSMMUT00000047173	chr1:54532888-54564184|chr1:54581456-54585363	0	0	0	0	0	0	0	0	0	0	0	0	0	0	1	0	0	1	0	0	0	0	0	0	0	0	0	0	0	0	0	0	0.705287
mmu_circ_001838	chr1_54564184_54581456_F	circRNA	Yes	chr1	54564184	54581456	+	460	17272	7	0,1194,2869,4650,10936,15974,17167	96,48,30,51,39,91,105	54564184,54565378,54567053,54568834,54575120,54580158,54581351	54564280,54565426,54567083,54568885,54575159,54580249,54581456	ENSMMUT00000006694	chr1:54532888-54564184|chr1:54581456-54585363	0	0	0	1	0	0	0	0	0	0	0	0	0	0	0	0	0	0	0	0	0	0	1	0	0	0	0	0	0	0	0	0	0
mmu_circ_001839	chr1_54564184_54592949_F	circRNA	Yes	chr1	54564184	54592949	+	813	28765	9	0,1194,2869,4650,15974,17167,21179,28116,28646	96,48,30,51,91,105,160,113,119	54564184,54565378,54567053,54568834,54580158,54581351,54585363,54592300,54592830	54564280,54565426,54567083,54568885,54580249,54581456,54585523,54592413,54592949	ENSMMUT00000047173	chr1:54532888-54564184|chr1:54592949-54597089	0	0	0	0	0	0	0	0	0	0	0	0	0	0	1	0	1	0	0	0	0	0	0	0	0	0	0	0	0	0	0	0	0
mmu_circ_001840	chr1_54568834_54585523_F	circRNA	Yes	chr1	54568834	54585523	+	407	16689	4	0,11324,12517,16529	51,91,105,160	54568834,54580158,54581351,54585363	54568885,54580249,54581456,54585523	PREDICTED.2827.1	chr1:54567083-54568834|chr1:54585523-54592300	1	0	0	0	0	0	0	0	0	0	0	0	0	0	0	0	1	0	0	0	0	0	0	0	0	1.04496	0	0	0	0	0	0	0
mmu_circ_001841	chr1_54592300_54592949_F	circRNA	Yes	chr1	54592300	54592949	+	232	649	2	0,530	113,119	54592300,54592830	54592413,54592949	ENSMMUT00000047173	chr1:54585523-54592300|chr1:54592949-54597089	0	0	1	0	3	0	1	2	0	0	1	0	0	3	4	0	1	1	1	0	1	0	0	0	0.613597	0	0.990325	0	0	0.993085	0	0	0.705287
mmu_circ_001846	chr1_54633570_54634336_R	circRNA	Yes	chr1	54633570	54634336	-	235	766	3	0,502,645	55,59,121	54633570,54634072,54634215	54633625,54634131,54634336	ENSMMUT00000006703	chr1:54631516-54633570|chr1:54634336-54635838	0	1	0	1	0	1	0	4	0	0	0	0	0	0	5	0	0	5	0	0	2	1	0	0	0	0	0	0	1.55173	0	0.430566	0	3.52644
mmu_circ_001847	chr1_54633570_54635916_R	circRNA	Yes	chr1	54633570	54635916	-	313	2346	4	0,502,645,2268	55,59,121,78	54633570,54634072,54634215,54635838	54633625,54634131,54634336,54635916	PREDICTED.1560.1	chr1:54631516-54633570|chr1:54635916-54637579	0	0	0	0	0	0	0	0	1	0	0	0	0	0	0	0	0	2	0	0	0	0	0	0	0	0	0	0	0	0	0	0	1.41057
mmu_circ_001848	chr1_54643498_54656045_R	circRNA	Yes	chr1	54643498	54656045	-	447	12547	4	0,1623,5845,12393	123,96,74,154	54643498,54645121,54649343,54655891	54643621,54645217,54649417,54656045	ENSMMUT00000006703	chr1:54641084-54643498|chr1:54656045-54657973	0	1	0	0	1	0	0	1	1	0	0	0	0	0	0	0	1	0	0	0	0	0	0	0	0	0	0	0	1.55173	0	0	0	0
mmu_circ_001856	chr1_55312394_55316635_R	circRNA	Yes	chr1	55312394	55316635	-	508	4241	3	0,3719,4121	175,213,120	55312394,55316113,55316515	55312569,55316326,55316635	PREDICTED.1976.1	chr1:55310015-55312394|chr1:55316635-55323970	0	0	0	1	0	0	1	1	0	0	0	0	0	0	4	0	0	0	0	0	0	0	0	0	0	0	0.990325	0	0	0	0	0	0
mmu_circ_001857	chr1_55312394_55324097_R	circRNA	Yes*	chr1	55312394	55324097	-	635	11703	4	0,3719,4121,11576	175,213,120,127	55312394,55316113,55316515,55323970	55312569,55316326,55316635,55324097	PREDICTED.2062.5	chr1:55310015-55312394|chr1:55324097-55325769	0	0	0	0	0	0	0	0	0	0	0	0	0	0	0	1	0	0	0	0	0	0	0	0	0	0	0	0	0	0	0	0	0
mmu_circ_001859	chr1_55359871_55360679_R	circRNA	Yes	chr1	55359871	55360679	-	808	808	1	0	808	55359871	55360679	PREDICTED.1976.4	chr1:55351635-55359871|chr1:55360679-55388407	1	0	0	0	0	0	1	0	0	0	0	0	0	0	0	0	0	0	0	0	0	0	0	0	0	1.04496	0.990325	0	0	0	0	0	0
mmu_circ_001860	chr1_55650930_55651251_F	circRNA	Yes	chr1	55650930	55651251	+	210	321	2	0,273	162,48	55650930,55651203	55651092,55651251	PREDICTED.1571.2	chr1:55645721-55650930|chr1:55651251-55663625	0	2	0	0	2	2	10	6	3	1	0	2	0	2	5	2	4	1	0	2	1	0	0	0	0	0	9.90325	0	3.10345	0	0	0	0.705287
mmu_circ_001861	chr1_55650930_55667187_F	circRNA	Yes*	chr1	55650930	55667187	+	559	16257	5	0,273,12695,13018,16159	162,48,198,53,98	55650930,55651203,55663625,55663948,55667089	55651092,55651251,55663823,55664001,55667187	PREDICTED.1571.2	chr1:55645721-55650930|chr1:55667187-55672282	0	0	0	0	0	0	0	0	0	0	0	0	0	0	0	0	1	0	0	0	0	0	0	0	0	0	0	0	0	0	0	0	0
mmu_circ_001866	chr1_55909628_55919040_F	circRNA	Yes	chr1	55909628	55919040	+	233	9412	2	0,9282	103,130	55909628,55918910	55909731,55919040	PREDICTED.3157.1	chr1:55898974-55909628|chr1:55919040-55927965	0	0	0	0	0	0	0	0	0	0	1	1	0	0	0	0	0	0	0	0	0	0	0	0	0	0	0	0	0	0	0	0	0
mmu_circ_001870	chr1_56913776_56919133_R	circRNA	Yes*	chr1	56913776	56919133	-	412	5357	4	0,1290,2921,5262	82,82,153,95	56913776,56915066,56916697,56919038	56913858,56915148,56916850,56919133	ENSMMUT00000047102	chr1:56909486-56913776|chr1:56919133-56920920	0	0	0	0	0	0	0	0	0	0	0	0	0	0	0	0	1	0	0	0	0	0	0	0	0	0	0	0	0	0	0	0	0
mmu_circ_001871	chr1_56913776_56921026_R	circRNA	Yes	chr1	56913776	56921026	-	518	7250	5	0,1290,2921,5262,7144	82,82,153,95,106	56913776,56915066,56916697,56919038,56920920	56913858,56915148,56916850,56919133,56921026	ENSMMUT00000047102	chr1:56909486-56913776|chr1:56921026-56927294	0	0	0	0	0	0	0	0	0	0	1	1	0	0	0	0	0	0	0	0	0	0	0	0	0	0	0	0	0	0	0	0	0
mmu_circ_001874	chr1_57920919_57935785_R	circRNA	Yes	chr1	57920919	57935785	-	1132	14866	12	0,503,980,2325,3897,5662,6974,7971,10157,12103,12603,14769	111,87,76,79,67,66,114,122,103,93,117,97	57920919,57921422,57921899,57923244,57924816,57926581,57927893,57928890,57931076,57933022,57933522,57935688	57921030,57921509,57921975,57923323,57924883,57926647,57928007,57929012,57931179,57933115,57933639,57935785	PREDICTED.3138.1	chr1:57918231-57920919|chr1:57935785-57939377	0	0	0	0	1	0	0	0	0	0	0	0	0	0	0	0	0	0	0	0	1	0	0	0	0	0	0	0	0	0	0	0	0
mmu_circ_001883	chr1_57969985_57970907_R	circRNA	Yes	chr1	57969985	57970907	-	232	922	2	0,851	161,71	57969985,57970836	57970146,57970907	PREDICTED.1205.4	chr1:57960285-57969985|chr1:57970907-57972834	0	0	0	3	0	0	0	0	0	0	0	0	0	0	0	0	0	0	0	0	0	0	0	0	0	0	0	0	0	0	0	0	0
mmu_circ_001884	chr1_57972834_57983050_R	circRNA	Yes	chr1	57972834	57983050	-	1075	10216	8	0,1006,1862,2205,5274,8334,9870,10130	156,160,229,96,98,156,94,86	57972834,57973840,57974696,57975039,57978108,57981168,57982704,57982964	57972990,57974000,57974925,57975135,57978206,57981324,57982798,57983050	PREDICTED.3288.1	chr1:57970907-57972834|chr1:57983050-57986311	0	0	0	0	0	0	0	1	0	0	1	0	0	0	0	0	0	0	0	0	0	0	0	0	0	0	0	0	0	0	0	0	0
mmu_circ_001887	chr1_59561368_59566196_F	circRNA	Yes	chr1	59561368	59566196	+	552	4828	4	0,964,2355,4603	94,145,88,225	59561368,59562332,59563723,59565971	59561462,59562477,59563811,59566196	PREDICTED.891.2	chr1:59546973-59561368|chr1:59566196-59573603	0	0	0	0	1	0	0	0	0	0	0	0	0	0	1	0	0	0	0	0	0	0	0	0	0	0	0	0	0	0	0	0	0
mmu_circ_001889	chr1_59573603_59574108_F	circRNA	Yes	chr1	59573603	59574108	+	505	505	1	0	505	59573603	59574108	PREDICTED.891.2	chr1:59566196-59573603|chr1:59574108-59575725	0	0	0	1	0	0	0	0	0	0	0	0	0	0	1	0	0	0	0	0	0	0	0	0	0	0	0	0	0	0	0	0	0
mmu_circ_001890	chr1_61352821_61387721_R	circRNA	Yes	chr1	61352821	61387721	-	462	34900	4	0,28408,31446,34792	150,75,129,108	61352821,61381229,61384267,61387613	61352971,61381304,61384396,61387721	PREDICTED.2089.1	chr1:61244868-61352821|chr1:61387721-61387818	2	0	0	0	0	0	0	0	0	0	0	0	0	0	0	0	0	0	0	0	0	0	0	0	0	2.08991	0	0	0	0	0	0	0
mmu_circ_001893	chr1_61352821_61391290_R	circRNA	Yes	chr1	61352821	61391290	-	865	38469	6	0,28408,31446,34792,34997,38240	150,75,129,108,174,229	61352821,61381229,61384267,61387613,61387818,61391061	61352971,61381304,61384396,61387721,61387992,61391290	ENSMMUT00000032031	chr1:61334205-61352821|chr1:61391290-61393348	0	0	0	0	0	0	3	0	0	0	0	0	1	0	0	0	0	0	0	0	0	0	0	0	0	0	2.97097	0.688568	0	0	0	0	0
mmu_circ_001894	chr1_61352821_61393865_R	circRNA	Yes	chr1	61352821	61393865	-	1382	41044	7	0,28408,31446,34792,34997,38240,40527	150,75,129,108,174,229,517	61352821,61381229,61384267,61387613,61387818,61391061,61393348	61352971,61381304,61384396,61387721,61387992,61391290,61393865	ENSMMUT00000032031	chr1:61334205-61352821|chr1:61393865-61401254	1	0	0	0	0	0	0	0	0	0	0	0	0	2	2	0	0	0	0	0	0	0	0	0	0	1.04496	0	0	0	0	0	0	0
mmu_circ_001895	chr1_61381229_61393865_R	circRNA	Yes	chr1	61381229	61393865	-	1232	12636	6	0,3038,6384,6589,9832,12119	75,129,108,174,229,517	61381229,61384267,61387613,61387818,61391061,61393348	61381304,61384396,61387721,61387992,61391290,61393865	ENSMMUT00000032031	chr1:61352971-61381229|chr1:61393865-61401254	1	0	0	0	0	0	0	1	0	0	0	0	0	0	2	1	0	0	0	0	0	0	0	0	0	1.04496	0	0	0	0	0	0	0
mmu_circ_001898	chr1_61533298_61536148_R	circRNA	Yes	chr1	61533298	61536148	-	860	2850	2	0,2751	761,99	61533298,61536049	61534059,61536148	PREDICTED.3182.3	chr1:61528847-61533298|chr1:61536148-61539893	0	0	0	0	1	0	0	0	0	0	0	0	0	0	0	2	0	0	0	0	1	0	0	0	0	0	0	0	0	0	0	0	0
mmu_circ_001901	chr1_62179548_62203825_F	circRNA	Yes	chr1	62179548	62203825	+	479	24277	3	0,18642,24125	215,112,152	62179548,62198190,62203673	62179763,62198302,62203825	PREDICTED.2111.1	chr1:62154324-62179548|chr1:62203825-62228460	1	0	0	0	0	0	0	0	0	0	0	0	3	0	0	1	0	0	0	0	0	0	0	0	0	1.04496	0	2.0657	0	0	0	0	0
mmu_circ_001902	chr1_62179548_62228549_F	circRNA	Yes	chr1	62179548	62228549	+	568	49001	4	0,18642,24125,48912	215,112,152,89	62179548,62198190,62203673,62228460	62179763,62198302,62203825,62228549	PREDICTED.2294.3	chr1:62154324-62179548|chr1:62228549-62306267	4	0	0	0	0	0	1	1	0	0	0	0	4	0	3	1	0	0	0	0	0	0	0	0	0	4.17982	0.990325	2.75427	0	0	0	0	0
mmu_circ_001903	chr1_62179548_62306383_F	circRNA	Yes*	chr1	62179548	62306383	+	684	126835	5	0,18642,24125,48912,126719	215,112,152,89,116	62179548,62198190,62203673,62228460,62306267	62179763,62198302,62203825,62228549,62306383	PREDICTED.2069.1	chr1:62154068-62179548|chr1:62306383-62367277	0	0	0	0	0	0	0	0	0	0	0	0	0	0	1	0	0	0	0	0	0	0	0	0	0	0	0	0	0	0	0	0	0
mmu_circ_001904	chr1_62198190_62203825_F	circRNA	Yes	chr1	62198190	62203825	+	264	5635	2	0,5483	112,152	62198190,62203673	62198302,62203825	ENSMMUT00000003390	chr1:62179763-62198190|chr1:62203825-62228460	0	0	1	2	1	0	2	1	1	0	0	0	1	0	2	0	1	0	1	0	3	0	2	0	0.613597	0	1.98065	0.688568	0	0.993085	0	0	0
mmu_circ_001905	chr1_62198190_62228549_F	circRNA	Yes	chr1	62198190	62228549	+	353	30359	3	0,5483,30270	112,152,89	62198190,62203673,62228460	62198302,62203825,62228549	ENSMMUT00000003390	chr1:62179763-62198190|chr1:62228549-62306267	5	0	0	2	2	0	1	0	0	0	0	0	2	0	3	1	0	1	0	0	2	0	0	0	0	5.22478	0.990325	1.37714	0	0	0	0	0.705287
mmu_circ_001906	chr1_62203673_62228549_F	circRNA	Yes	chr1	62203673	62228549	+	241	24876	2	0,24787	152,89	62203673,62228460	62203825,62228549	ENSMMUT00000003389	chr1:62198302-62203673|chr1:62228549-62306267	0	0	0	0	1	0	3	0	0	0	0	0	1	0	0	0	2	0	0	0	0	0	0	0	0	0	2.97097	0.688568	0	0	0	0	0
mmu_circ_001907	chr1_62462524_62503469_F	circRNA	Yes	chr1	62462524	62503469	+	588	40945	6	0,12209,15251,27991,34436,40850	62,148,87,75,121,95	62462524,62474733,62477775,62490515,62496960,62503374	62462586,62474881,62477862,62490590,62497081,62503469	PREDICTED.2069.1	chr1:62442983-62462524|chr1:62503469-62588221	0	0	0	0	0	0	0	0	0	0	0	0	0	0	0	0	2	0	0	0	0	0	0	0	0	0	0	0	0	0	0	0	0
mmu_circ_001913	chr1_64499791_64506660_R	circRNA	Yes	chr1	64499791	64506660	-	166	6869	2	0,6777	74,92	64499791,64506568	64499865,64506660	ENSMMUT00000015292	chr1:64487904-64499791|chr1:64506660-64515486	0	0	0	0	1	0	0	0	0	0	0	0	0	0	0	0	0	0	0	0	0	0	0	1	0	0	0	0	0	0	0	0.401374	0
mmu_circ_001914	chr1_64499791_64515595_R	circRNA	Yes	chr1	64499791	64515595	-	275	15804	3	0,6777,15695	74,92,109	64499791,64506568,64515486	64499865,64506660,64515595	ENSMMUT00000015292	chr1:64487904-64499791|chr1:64515595-64524427	0	0	3	0	0	0	0	0	0	0	1	4	0	2	3	1	0	3	0	0	0	0	0	0	0	0	0	0	0	2.97926	0	0	2.11586
mmu_circ_001915	chr1_64506568_64515595_R	circRNA	Yes	chr1	64506568	64515595	-	201	9027	2	0,8918	92,109	64506568,64515486	64506660,64515595	ENSMMUT00000015292	chr1:64499865-64506568|chr1:64515595-64524427	0	0	0	0	0	0	3	0	2	0	0	1	0	3	2	2	1	0	0	0	1	0	0	0	0	0	2.97097	0	0	0	0	0	0
mmu_circ_001918	chr1_65252612_65253393_F	circRNA	Yes	chr1	65252612	65253393	+	226	781	2	0,676	121,105	65252612,65253288	65252733,65253393	ENSMMUT00000003313	chr1:65250805-65252612|chr1:65253393-65254250	0	0	0	0	0	1	1	0	0	0	0	0	0	0	0	0	0	0	0	0	0	0	0	0	0	0	0.990325	0	0	0	0	0	0
mmu_circ_001921	chr1_65254250_65259407_F	circRNA	Yes	chr1	65254250	65259407	+	1253	5157	4	0,1596,4114,4955	188,692,171,202	65254250,65255846,65258364,65259205	65254438,65256538,65258535,65259407	ENSMMUT00000003313	chr1:65253393-65254250|chr1:65259407-65260976	0	0	0	0	0	0	0	0	0	0	0	0	0	0	1	0	0	1	0	0	0	0	0	0	0	0	0	0	0	0	0	0	0.705287
mmu_circ_001922	chr1_65255846_65259407_F	circRNA	Yes*	chr1	65255846	65259407	+	1065	3561	3	0,2518,3359	692,171,202	65255846,65258364,65259205	65256538,65258535,65259407	ENSMMUT00000003313	chr1:65254438-65255846|chr1:65259407-65260976	0	0	0	0	0	0	0	0	0	0	0	0	0	0	0	0	0	0	0	0	0	0	0	1	0	0	0	0	0	0	0	0.401374	0
mmu_circ_001927	chr1_65349319_65359304_R	circRNA	Yes	chr1	65349319	65359304	-	845	9985	7	0,2367,4533,4737,7557,8600,9892	140,171,114,141,96,90,93	65349319,65351686,65353852,65354056,65356876,65357919,65359211	65349459,65351857,65353966,65354197,65356972,65358009,65359304	ENSMMUT00000003320	chr1:65342707-65349319|chr1:65359304-65367288	0	0	0	0	0	1	0	1	0	0	0	0	0	0	0	0	0	0	0	0	0	0	0	0	0	0	0	0	0	0	0	0	0
mmu_circ_001930	chr1_65383647_65393171_R	circRNA	Yes*	chr1	65383647	65393171	-	430	9524	4	0,1907,6077,9406	102,139,71,118	65383647,65385554,65389724,65393053	65383749,65385693,65389795,65393171	PREDICTED.992.2	chr1:65376071-65383647|chr1:65393171-65425900	0	0	0	0	0	0	0	0	1	0	0	0	0	0	0	0	0	0	0	0	0	0	0	0	0	0	0	0	0	0	0	0	0
mmu_circ_001934	chr1_65594036_65611984_F	circRNA	Yes	chr1	65594036	65611984	+	864	17948	5	0,1168,12471,15112,17877	144,84,234,331,71	65594036,65595204,65606507,65609148,65611913	65594180,65595288,65606741,65609479,65611984	ENSMMUT00000000560	chr1:65574616-65594036|chr1:65611984-65619555	1	0	0	0	0	0	0	1	0	0	0	0	2	0	1	1	0	3	0	0	0	0	0	0	0	1.04496	0	1.37714	0	0	0	0	2.11586
mmu_circ_001936	chr1_65594036_65632663_F	circRNA	Yes	chr1	65594036	65632663	+	1277	38627	9	0,1168,12471,15112,17877,25519,30830,31568,38507	144,84,234,331,71,137,79,77,120	65594036,65595204,65606507,65609148,65611913,65619555,65624866,65625604,65632543	65594180,65595288,65606741,65609479,65611984,65619692,65624945,65625681,65632663	ENSMMUT00000000560	chr1:65574616-65594036|chr1:65632663-65655670	0	0	0	0	0	0	0	0	0	0	0	0	1	0	0	0	2	0	0	0	0	0	0	0	0	0	0	0.688568	0	0	0	0	0
mmu_circ_001942	chr1_66324411_66346088_F	circRNA	Yes	chr1	66324411	66346088	+	1011	21677	7	0,4436,8066,9506,13628,18905,21569	142,110,158,134,149,210,108	66324411,66328847,66332477,66333917,66338039,66343316,66345980	66324553,66328957,66332635,66334051,66338188,66343526,66346088	ENSMMUT00000028185	chr1:66312677-66324411|chr1:66346088-66347368	0	2	0	0	0	0	0	0	0	0	0	0	0	0	0	0	0	0	0	0	0	0	0	0	0	0	0	0	3.10345	0	0	0	0
mmu_circ_001943	chr1_66405925_66408260_F	circRNA	Yes	chr1	66405925	66408260	+	436	2335	3	0,517,2209	163,147,126	66405925,66406442,66408134	66406088,66406589,66408260	PREDICTED.1869.1	chr1:66371105-66405925|chr1:66408260-66411257	0	0	0	0	0	0	0	0	0	0	0	0	0	0	0	0	0	2	0	0	0	0	0	0	0	0	0	0	0	0	0	0	1.41057
mmu_circ_001945	chr1_66405925_66415228_F	circRNA	Yes	chr1	66405925	66415228	+	898	9303	6	0,517,2209,5332,6741,9187	163,147,126,191,155,116	66405925,66406442,66408134,66411257,66412666,66415112	66406088,66406589,66408260,66411448,66412821,66415228	ENSMMUT00000028187	chr1:66371105-66405925|chr1:66415228-66425164	1	1	0	0	1	0	0	0	0	0	0	0	1	0	2	2	0	0	0	0	0	0	0	0	0	1.04496	0	0.688568	1.55173	0	0	0	0
mmu_circ_001946	chr1_66405925_66431102_F	circRNA	Yes	chr1	66405925	66431102	+	1353	25177	9	0,517,2209,5332,6741,9187,19239,22392,25042	163,147,126,191,155,116,136,184,135	66405925,66406442,66408134,66411257,66412666,66415112,66425164,66428317,66430967	66406088,66406589,66408260,66411448,66412821,66415228,66425300,66428501,66431102	ENSMMUT00000028187	chr1:66371105-66405925|chr1:66431102-66436229	0	0	2	0	0	0	0	0	0	0	0	1	1	0	0	0	0	2	0	0	0	0	0	0	0	0	0	0.688568	0	1.98617	0	0	1.41057
mmu_circ_001947	chr1_66408134_66411448_F	circRNA	Yes	chr1	66408134	66411448	+	317	3314	2	0,3123	126,191	66408134,66411257	66408260,66411448	ENSMMUT00000028187	chr1:66406589-66408134|chr1:66411448-66412666	0	0	0	2	0	0	0	0	0	0	0	0	0	0	0	0	0	0	0	0	0	0	0	0	0	0	0	0	0	0	0	0	0
mmu_circ_001948	chr1_66411257_66415228_F	circRNA	Yes	chr1	66411257	66415228	+	462	3971	3	0,1409,3855	191,155,116	66411257,66412666,66415112	66411448,66412821,66415228	ENSMMUT00000028187	chr1:66408260-66411257|chr1:66415228-66425164	0	0	0	0	0	0	0	0	0	0	0	0	1	0	0	0	0	0	0	0	0	0	0	2	0	0	0	0.688568	0	0	0	0.802748	0
mmu_circ_001953	chr1_67542039_67563994_F	circRNA	Yes*	chr1	67542039	67563994	+	902	21955	5	0,9026,12425,13099,21828	67,470,46,192,127	67542039,67551065,67554464,67555138,67563867	67542106,67551535,67554510,67555330,67563994	PREDICTED.1840.2	chr1:67520019-67542039|chr1:67563994-67577109	0	0	0	0	0	0	0	0	0	0	0	0	1	0	0	0	0	0	0	0	0	0	0	0	0	0	0	0.688568	0	0	0	0	0
mmu_circ_001955	chr1_67551065_67555330_F	circRNA	Yes	chr1	67551065	67555330	+	662	4265	2	0,4073	470,192	67551065,67555138	67551535,67555330	PREDICTED.1299.1	chr1:67542106-67551065|chr1:67555330-67563867	0	0	0	0	0	0	0	0	0	0	0	0	0	0	1	0	0	0	3	0	0	0	0	0	1.84079	0	0	0	0	0	0	0	0
mmu_circ_001956	chr1_67551065_67555330_F	circRNA	Yes	chr1	67551065	67555330	+	708	4265	3	0,3399,4073	470,46,192	67551065,67554464,67555138	67551535,67554510,67555330	PREDICTED.1840.2	chr1:67542106-67551065|chr1:67555330-67563867	0	0	0	0	0	0	0	1	0	0	0	0	0	0	0	0	0	0	0	0	1	0	0	0	0	0	0	0	0	0	0	0	0
mmu_circ_001965	chr1_68153062_68154635_F	circRNA	Yes	chr1	68153062	68154635	+	350	1573	3	0,1261,1424	151,50,149	68153062,68154323,68154486	68153213,68154373,68154635	ENSMMUT00000046986	chr1:68101736-68153062|chr1:68154635-68168171	0	0	0	0	0	0	0	0	0	0	0	0	0	1	0	0	0	1	0	0	0	0	0	0	0	0	0	0	0	0	0	0	0.705287
mmu_circ_001971	chr1_69736337_69742334_F	circRNA	Yes	chr1	69736337	69742334	+	424	5997	6	0,1101,5800,5829,5889,5924	162,109,13,55,12,73	69736337,69737438,69742137,69742166,69742226,69742261	69736499,69737547,69742150,69742221,69742238,69742334	ENSMMUT00000000926	chr1:69724361-69736337|chr1:69742334-69749650	0	0	1	0	0	0	0	0	0	0	0	0	0	1	0	0	0	0	0	0	0	0	0	0	0	0	0	0	0	0.993085	0	0	0
mmu_circ_001975	chr1_70202881_70213006_R	circRNA	Yes	chr1	70202881	70213006	-	643	10125	5	0,4787,9116,9793,9984	174,178,78,72,141	70202881,70207668,70211997,70212674,70212865	70203055,70207846,70212075,70212746,70213006	PREDICTED.863.1	chr1:70200235-70202881|chr1:70213006-70213859	0	0	0	1	0	0	1	0	0	0	0	0	0	0	0	1	0	0	0	0	0	0	0	0	0	0	0.990325	0	0	0	0	0	0
mmu_circ_001976	chr1_70202881_70213006_R	circRNA	Yes	chr1	70202881	70213006	-	661	10125	5	0,4787,9116,9793,9984	174,178,78,90,141	70202881,70207668,70211997,70212674,70212865	70203055,70207846,70212075,70212764,70213006	PREDICTED.1984.2	chr1:70200235-70202881|chr1:70213006-70213859	0	0	0	0	1	0	0	1	0	0	0	0	1	0	0	0	0	1	0	0	0	0	0	0	0	0	0	0.688568	0	0	0	0	0.705287
mmu_circ_001978	chr1_70211997_70213006_R	circRNA	Yes	chr1	70211997	70213006	-	309	1009	3	0,677,868	78,90,141	70211997,70212674,70212865	70212075,70212764,70213006	PREDICTED.1984.2	chr1:70207846-70211997|chr1:70213006-70213859	0	0	0	0	0	0	0	0	0	0	0	0	0	0	3	0	0	0	0	0	0	0	0	0	0	0	0	0	0	0	0	0	0
mmu_circ_001986	chr1_73024746_73030599_R	circRNA	Yes	chr1	73024746	73030599	-	280	5853	3	0,3743,5773	101,99,80	73024746,73028489,73030519	73024847,73028588,73030599	PREDICTED.3619.1	chr1:73019084-73024746|chr1:73030599-73044088	0	0	0	1	0	0	0	0	0	0	0	0	0	0	0	1	0	0	0	0	0	0	0	0	0	0	0	0	0	0	0	0	0
mmu_circ_001990	chr1_73044088_73056819_R	circRNA	Yes	chr1	73044088	73056819	-	506	12731	4	0,3711,7959,12664	162,132,145,67	73044088,73047799,73052047,73056752	73044250,73047931,73052192,73056819	ENSMMUT00000046901	chr1:73030599-73044088|chr1:73056819-73061570	0	0	0	0	0	0	1	0	0	0	0	0	0	0	0	0	0	1	0	0	1	0	0	0	0	0	0.990325	0	0	0	0	0	0.705287
mmu_circ_001991	chr1_73044088_73063483_R	circRNA	Yes	chr1	73044088	73063483	-	638	19395	6	0,3711,7959,12664,17482,19309	162,132,145,67,46,86	73044088,73047799,73052047,73056752,73061570,73063397	73044250,73047931,73052192,73056819,73061616,73063483	ENSMMUT00000046901	chr1:73030599-73044088|chr1:73063483-73084953	0	0	1	0	3	1	4	0	1	0	0	0	0	0	5	1	3	3	0	0	0	0	0	0	0	0	3.9613	0	0	0.993085	0	0	2.11586
mmu_circ_001994	chr1_73047799_73063483_R	circRNA	Yes	chr1	73047799	73063483	-	476	15684	5	0,4248,8953,13771,15598	132,145,67,46,86	73047799,73052047,73056752,73061570,73063397	73047931,73052192,73056819,73061616,73063483	ENSMMUT00000046901	chr1:73044250-73047799|chr1:73063483-73084953	0	0	0	0	0	0	0	1	0	0	0	0	0	0	1	0	0	0	0	0	0	0	0	0	0	0	0	0	0	0	0	0	0
mmu_circ_001995	chr1_73052047_73061616_R	circRNA	Yes*	chr1	73052047	73061616	-	191	9569	2	0,9523	145,46	73052047,73061570	73052192,73061616	PREDICTED.1592.1	chr1:73047931-73052047|chr1:73061616-73063397	0	0	0	0	0	0	0	0	0	0	0	1	0	0	0	0	0	0	0	0	0	0	0	0	0	0	0	0	0	0	0	0	0
mmu_circ_001996	chr1_73052047_73063483_R	circRNA	Yes*	chr1	73052047	73063483	-	344	11436	4	0,4705,9523,11350	145,67,46,86	73052047,73056752,73061570,73063397	73052192,73056819,73061616,73063483	ENSMMUT00000046901	chr1:73047931-73052047|chr1:73063483-73084953	0	0	0	0	0	0	0	0	0	0	0	0	0	0	0	0	0	1	0	0	0	0	0	0	0	0	0	0	0	0	0	0	0.705287
mmu_circ_002004	chr1_78529772_78540913_F	circRNA	Yes*	chr1	78529772	78540913	+	438	11141	5	0,3975,4189,4866,11060	88,98,70,101,81	78529772,78533747,78533961,78534638,78540832	78529860,78533845,78534031,78534739,78540913	ENSMMUT00000046869	chr1:78526189-78529772|chr1:78540913-78546479	0	0	0	0	0	0	0	0	0	0	0	0	1	0	0	0	0	0	0	0	0	0	0	0	0	0	0	0.688568	0	0	0	0	0
mmu_circ_002008	chr1_78533747_78540913_F	circRNA	Yes	chr1	78533747	78540913	+	350	7166	4	0,214,891,7085	98,70,101,81	78533747,78533961,78534638,78540832	78533845,78534031,78534739,78540913	ENSMMUT00000046869	chr1:78529860-78533747|chr1:78540913-78546479	1	0	2	1	0	0	1	1	1	0	0	1	0	2	4	1	3	2	0	2	0	0	0	0	0	1.04496	0.990325	0	0	1.98617	0	0	1.41057
mmu_circ_002009	chr1_78533747_78546610_F	circRNA	Yes*	chr1	78533747	78546610	+	481	12863	5	0,214,891,7085,12732	98,70,101,81,131	78533747,78533961,78534638,78540832,78546479	78533845,78534031,78534739,78540913,78546610	PREDICTED.1475.2	chr1:78529860-78533747|chr1:78546610-78553300	0	0	0	0	0	0	0	0	0	0	0	0	0	0	1	0	0	0	0	0	0	0	0	0	0	0	0	0	0	0	0	0	0
mmu_circ_002013	chr1_78546479_78549776_F	circRNA	Yes	chr1	78546479	78549776	+	240	3297	2	0,3188	131,109	78546479,78549667	78546610,78549776	ENSMMUT00000046869	chr1:78540913-78546479|chr1:78549776-78553300	0	0	0	0	0	0	0	0	0	0	0	0	0	0	0	0	0	0	1	0	0	1	0	0	0.613597	0	0	0	0	0	0.430566	0	0
mmu_circ_002014	chr1_78546479_78553441_F	circRNA	Yes	chr1	78546479	78553441	+	272	6962	2	0,6821	131,141	78546479,78553300	78546610,78553441	PREDICTED.1475.2	chr1:78540913-78546479|chr1:78553441-78554304	0	0	0	0	0	0	0	0	0	0	0	0	0	0	2	0	0	0	0	0	0	0	0	0	0	0	0	0	0	0	0	0	0
mmu_circ_002015	chr1_78546479_78553441_F	circRNA	Yes	chr1	78546479	78553441	+	381	6962	3	0,3188,6821	131,109,141	78546479,78549667,78553300	78546610,78549776,78553441	ENSMMUT00000046869	chr1:78540913-78546479|chr1:78553441-78554304	0	0	0	0	0	0	0	0	0	0	1	0	1	0	0	0	0	0	0	0	0	0	0	0	0	0	0	0.688568	0	0	0	0	0
mmu_circ_002016	chr1_78546479_78554400_F	circRNA	Yes	chr1	78546479	78554400	+	477	7921	4	0,3188,6821,7825	131,109,141,96	78546479,78549667,78553300,78554304	78546610,78549776,78553441,78554400	ENSMMUT00000046869	chr1:78540913-78546479|chr1:78554400-78565591	2	0	0	0	1	0	5	2	0	0	2	0	2	0	0	0	3	1	1	0	0	2	0	0	0.613597	2.08991	4.95162	1.37714	0	0	0.861132	0	0.705287
mmu_circ_002017	chr1_78549667_78554400_F	circRNA	Yes	chr1	78549667	78554400	+	346	4733	3	0,3633,4637	109,141,96	78549667,78553300,78554304	78549776,78553441,78554400	ENSMMUT00000046869	chr1:78546610-78549667|chr1:78554400-78565591	3	0	2	0	0	0	1	1	3	0	0	1	2	0	1	0	2	2	0	0	3	0	0	0	0	3.13487	0.990325	1.37714	0	1.98617	0	0	1.41057
mmu_circ_002018	chr1_78553300_78554400_F	circRNA	Yes	chr1	78553300	78554400	+	237	1100	2	0,1004	141,96	78553300,78554304	78553441,78554400	ENSMMUT00000046869	chr1:78549776-78553300|chr1:78554400-78565591	0	2	0	0	1	0	0	0	0	0	0	0	0	0	2	0	1	0	0	0	0	0	0	0	0	0	0	0	3.10345	0	0	0	0
mmu_circ_002019	chr1_78590224_78592109_F	circRNA	Yes	chr1	78590224	78592109	+	306	1885	2	0,1687	108,198	78590224,78591911	78590332,78592109	PREDICTED.1411.2	chr1:78589000-78590224|chr1:78592109-78592691	0	0	0	0	0	0	1	0	0	0	0	0	0	0	0	0	1	0	0	0	0	0	0	0	0	0	0.990325	0	0	0	0	0	0
mmu_circ_002020	chr1_79994398_80041652_R	circRNA	Yes	chr1	79994398	80041652	-	893	47254	8	0,6806,7113,9341,12221,15110,43434,47200	173,111,118,97,112,136,92,54	79994398,80001204,80001511,80003739,80006619,80009508,80037832,80041598	79994571,80001315,80001629,80003836,80006731,80009644,80037924,80041652	ENSMMUT00000028442	chr1:79963588-79994398|chr1:80041652-80050021	0	0	0	0	0	0	0	0	1	0	0	1	0	0	0	2	0	0	0	0	0	0	0	0	0	0	0	0	0	0	0	0	0
mmu_circ_002022	chr1_80037832_80041652_R	circRNA	Yes	chr1	80037832	80041652	-	146	3820	2	0,3766	92,54	80037832,80041598	80037924,80041652	ENSMMUT00000028442	chr1:80009644-80037832|chr1:80041652-80050021	1	0	0	1	0	0	0	0	0	0	0	0	0	2	0	0	0	0	0	0	1	0	0	0	0	1.04496	0	0	0	0	0	0	0
mmu_circ_002026	chr1_80479117_80488842_R	circRNA	Yes	chr1	80479117	80488842	-	1907	9725	4	0,7571,9452,9591	1556,154,63,134	80479117,80486688,80488569,80488708	80480673,80486842,80488632,80488842	ENSMMUT00000028446	chr1:80431399-80479117|chr1:80488842-80532727	2	2	0	0	0	0	0	0	0	1	0	0	0	0	0	0	0	0	0	0	0	0	0	1	0	2.08991	0	0	3.10345	0	0	0.401374	0
mmu_circ_002028	chr1_80488569_80488842_R	circRNA	Yes	chr1	80488569	80488842	-	197	273	2	0,139	63,134	80488569,80488708	80488632,80488842	PREDICTED.1656.3	chr1:80486842-80488569|chr1:80488842-80532727	0	0	0	0	0	0	0	0	2	0	0	0	0	1	0	0	0	0	0	0	0	0	0	0	0	0	0	0	0	0	0	0	0
mmu_circ_002030	chr1_80550347_80562956_R	circRNA	Yes	chr1	80550347	80562956	-	294	12609	3	0,11065,12527	103,109,82	80550347,80561412,80562874	80550450,80561521,80562956	ENSMMUT00000025757	chr1:80547533-80550347|chr1:80562956-80564260	0	0	0	0	1	0	0	0	2	1	0	0	0	0	0	0	0	1	0	0	0	0	0	0	0	0	0	0	0	0	0	0	0.705287
mmu_circ_002031	chr1_80550347_80564430_R	circRNA	Yes	chr1	80550347	80564430	-	464	14083	4	0,11065,12527,13913	103,109,82,170	80550347,80561412,80562874,80564260	80550450,80561521,80562956,80564430	ENSMMUT00000025757	chr1:80547533-80550347|chr1:80564430-80565333	0	0	1	1	0	0	0	2	0	0	0	0	0	3	1	2	0	0	0	0	0	0	0	0	0	0	0	0	0	0.993085	0	0	0
mmu_circ_002032	chr1_80550347_80565460_R	circRNA	Yes	chr1	80550347	80565460	-	591	15113	5	0,11065,12527,13913,14986	103,109,82,170,127	80550347,80561412,80562874,80564260,80565333	80550450,80561521,80562956,80564430,80565460	ENSMMUT00000025757	chr1:80547533-80550347|chr1:80565460-80567407	1	0	0	2	0	0	0	0	0	0	0	0	0	0	0	0	1	0	0	0	0	0	0	0	0	1.04496	0	0	0	0	0	0	0
mmu_circ_002033	chr1_80550347_80568176_R	circRNA	Yes	chr1	80550347	80568176	-	818	17829	7	0,11065,12527,13913,14986,17060,17783	103,109,82,170,127,181,46	80550347,80561412,80562874,80564260,80565333,80567407,80568130	80550450,80561521,80562956,80564430,80565460,80567588,80568176	PREDICTED.2068.1	chr1:80547533-80550347|chr1:80568176-80570752	0	0	0	0	0	0	0	0	0	0	0	0	1	0	0	0	0	0	0	0	1	0	0	0	0	0	0	0.688568	0	0	0	0	0
mmu_circ_002034	chr1_80561412_80562956_R	circRNA	Yes	chr1	80561412	80562956	-	191	1544	2	0,1462	109,82	80561412,80562874	80561521,80562956	ENSMMUT00000025757	chr1:80550450-80561412|chr1:80562956-80564260	7	1	1	2	4	4	0	6	4	1	2	2	5	3	10	4	7	1	5	0	3	0	3	1	3.06799	7.31469	0	3.44284	1.55173	0.993085	0	0.401374	0.705287
mmu_circ_002035	chr1_80561412_80564430_R	circRNA	Yes	chr1	80561412	80564430	-	361	3018	3	0,1462,2848	109,82,170	80561412,80562874,80564260	80561521,80562956,80564430	ENSMMUT00000025757	chr1:80550450-80561412|chr1:80564430-80565333	1	0	0	0	0	0	0	0	2	0	1	0	0	1	0	0	0	0	0	0	0	0	0	0	0	1.04496	0	0	0	0	0	0	0
mmu_circ_002036	chr1_80561412_80565460_R	circRNA	Yes	chr1	80561412	80565460	-	488	4048	4	0,1462,2848,3921	109,82,170,127	80561412,80562874,80564260,80565333	80561521,80562956,80564430,80565460	ENSMMUT00000025757	chr1:80550450-80561412|chr1:80565460-80567407	2	0	0	0	0	0	0	0	0	0	0	0	1	1	0	1	0	0	0	0	0	0	0	0	0	2.08991	0	0.688568	0	0	0	0	0
mmu_circ_002039	chr1_80567407_80568176_R	circRNA	Yes	chr1	80567407	80568176	-	227	769	2	0,723	181,46	80567407,80568130	80567588,80568176	ENSMMUT00000025757	chr1:80565460-80567407|chr1:80568176-80570752	4	0	1	0	0	2	0	3	3	0	0	0	0	8	7	0	2	4	0	0	0	0	0	0	0	4.17982	0	0	0	0.993085	0	0	2.82115
mmu_circ_002040	chr1_80567407_80570786_R	circRNA	Yes	chr1	80567407	80570786	-	261	3379	3	0,723,3345	181,46,34	80567407,80568130,80570752	80567588,80568176,80570786	PREDICTED.3783.1	chr1:80565460-80567407|chr1:80570786-80571723	0	0	1	0	3	0	0	0	0	0	0	0	0	0	0	0	0	0	0	0	0	0	0	0	0	0	0	0	0	0.993085	0	0	0
mmu_circ_002042	chr1_80585859_80587876_R	circRNA	Yes	chr1	80585859	80587876	-	173	2017	2	0,1914	70,103	80585859,80587773	80585929,80587876	ENSMMUT00000025757	chr1:80581384-80585859|chr1:80587876-80591025	0	0	0	0	0	0	0	1	0	0	0	0	0	0	1	0	0	1	0	0	0	0	0	0	0	0	0	0	0	0	0	0	0.705287
mmu_circ_002043	chr1_80585859_80591178_R	circRNA	Yes*	chr1	80585859	80591178	-	326	5319	3	0,1914,5166	70,103,153	80585859,80587773,80591025	80585929,80587876,80591178	ENSMMUT00000025757	chr1:80581384-80585859|chr1:80591178-80592656	0	0	0	0	0	0	0	1	0	0	0	0	0	0	0	0	0	0	0	0	0	0	0	0	0	0	0	0	0	0	0	0	0
mmu_circ_002045	chr1_80641644_80653672_F	circRNA	Yes	chr1	80641644	80653672	+	700	12028	5	0,2596,6071,10516,11904	178,137,127,134,124	80641644,80644240,80647715,80652160,80653548	80641822,80644377,80647842,80652294,80653672	ENSMMUT00000016785	chr1:80632060-80641644|chr1:80653672-80682130	3	0	0	1	2	0	2	3	0	0	0	0	0	2	1	1	4	3	3	1	1	0	0	0	1.84079	3.13487	1.98065	0	0	0	0	0	2.11586
mmu_circ_002046	chr1_80641644_80682231_F	circRNA	Yes	chr1	80641644	80682231	+	801	40587	6	0,2596,6071,10516,11904,40486	178,137,127,134,124,101	80641644,80644240,80647715,80652160,80653548,80682130	80641822,80644377,80647842,80652294,80653672,80682231	ENSMMUT00000016785	chr1:80632060-80641644|chr1:80682231-80698536	0	0	0	0	0	0	0	0	0	0	0	0	2	0	1	0	0	1	0	0	0	0	0	0	0	0	0	1.37714	0	0	0	0	0.705287
mmu_circ_002047	chr1_80644240_80647842_F	circRNA	Yes	chr1	80644240	80647842	+	264	3602	2	0,3475	137,127	80644240,80647715	80644377,80647842	PREDICTED.2458.1	chr1:80641822-80644240|chr1:80647842-80652160	0	0	0	0	0	0	0	0	0	0	0	0	0	0	2	0	0	0	0	0	0	0	0	0	0	0	0	0	0	0	0	0	0
mmu_circ_002049	chr1_80652160_80682231_F	circRNA	Yes	chr1	80652160	80682231	+	359	30071	3	0,1388,29970	134,124,101	80652160,80653548,80682130	80652294,80653672,80682231	ENSMMUT00000016785	chr1:80647842-80652160|chr1:80682231-80698536	0	0	1	0	0	0	1	0	0	0	0	0	0	1	0	0	1	0	0	0	1	0	0	0	0	0	0.990325	0	0	0.993085	0	0	0
mmu_circ_002051	chr1_80752025_80754243_F	circRNA	Yes	chr1	80752025	80754243	+	499	2218	4	0,1509,1904,2069	79,192,79,149	80752025,80753534,80753929,80754094	80752104,80753726,80754008,80754243	PREDICTED.2241.1	chr1:80726755-80752025|chr1:80754243-80760907	2	0	1	0	0	0	0	2	0	0	0	0	0	1	3	0	0	1	1	5	2	0	0	2	0.613597	2.08991	0	0	0	0.993085	0	0.802748	0.705287
mmu_circ_002062	chr1_81750705_81768339_R	circRNA	Yes	chr1	81750705	81768339	-	911	17634	6	0,7493,9022,9317,10407,17481	206,117,184,180,71,153	81750705,81758198,81759727,81760022,81761112,81768186	81750911,81758315,81759911,81760202,81761183,81768339	PREDICTED.1048.1	chr1:81745626-81750705|chr1:81768339-81829069	0	0	0	0	1	0	0	0	0	0	0	0	0	1	0	0	0	0	0	0	0	0	0	0	0	0	0	0	0	0	0	0	0
mmu_circ_002064	chr1_830551_849952_R	circRNA	Yes	chr1	830551	849952	-	493	19401	6	0,2396,5288,5411,8288,19317	139,80,13,56,121,84	830551,832947,835839,835962,838839,849868	830690,833027,835852,836018,838960,849952	PREDICTED.174.2	chr1:822261-830551|chr1:849952-853146	5	0	0	0	0	0	6	1	0	0	0	0	0	0	0	0	2	1	3	0	0	0	0	0	1.84079	5.22478	5.94195	0	0	0	0	0	0.705287
mmu_circ_002065	chr1_830551_849952_R	circRNA	Yes	chr1	830551	849952	-	499	19401	6	0,2396,5288,5411,8288,19317	145,80,13,56,121,84	830551,832947,835839,835962,838839,849868	830696,833027,835852,836018,838960,849952	ENSMMUT00000011739	chr1:822261-830551|chr1:849952-853146	0	2	0	2	2	2	0	0	0	0	0	0	0	9	2	3	0	0	0	0	0	0	0	0	0	0	0	0	3.10345	0	0	0	0
mmu_circ_002066	chr1_838839_849952_R	circRNA	Yes	chr1	838839	849952	-	205	11113	2	0,11029	121,84	838839,849868	838960,849952	PREDICTED.162.3	chr1:836018-838839|chr1:849952-853146	0	1	0	2	0	0	0	0	0	0	0	0	0	1	0	0	0	0	0	0	0	0	0	0	0	0	0	0	1.55173	0	0	0	0
mmu_circ_002068	chr1_84637498_84708166_F	circRNA	Yes	chr1	84637498	84708166	+	387	70668	2	0,70454	173,214	84637498,84707952	84637671,84708166	ENSMMUT00000046823	chr1:84562433-84637498|chr1:84708166-84737752	0	0	0	0	0	0	1	2	0	0	0	0	1	1	0	1	0	0	0	0	0	0	0	0	0	0	0.990325	0.688568	0	0	0	0	0
mmu_circ_002074	chr1_86700472_86740948_R	circRNA	Yes*	chr1	86700472	86740948	-	1439	40476	13	0,4929,6993,8376,8536,22828,23706,23793,23953,24166,31142,35779,40317	199,87,136,74,148,95,50,22,11,76,165,217,159	86700472,86705401,86707465,86708848,86709008,86723300,86724178,86724265,86724425,86724638,86731614,86736251,86740789	86700671,86705488,86707601,86708922,86709156,86723395,86724228,86724287,86724436,86724714,86731779,86736468,86740948	PREDICTED.2228.1	chr1:86696981-86700472|chr1:86740948-86742307	0	0	0	0	0	0	0	0	0	0	0	0	0	1	0	0	0	0	0	0	0	0	0	0	0	0	0	0	0	0	0	0	0
mmu_circ_002075	chr1_86723300_86736468_R	circRNA	Yes*	chr1	86723300	86736468	-	636	13168	7	0,878,965,1125,1338,8314,12951	95,50,22,11,76,165,217	86723300,86724178,86724265,86724425,86724638,86731614,86736251	86723395,86724228,86724287,86724436,86724714,86731779,86736468	PREDICTED.2228.1	chr1:86709156-86723300|chr1:86736468-86740789	0	0	0	0	0	0	0	0	0	0	0	0	0	0	0	1	0	0	0	0	0	0	0	0	0	0	0	0	0	0	0	0	0
mmu_circ_002076	chr1_86723300_86746048_R	circRNA	Yes	chr1	86723300	86746048	-	1318	22748	12	0,878,965,1125,1338,8314,12951,17489,19007,20225,22202,22547	95,50,22,11,76,165,217,159,68,122,132,201	86723300,86724178,86724265,86724425,86724638,86731614,86736251,86740789,86742307,86743525,86745502,86745847	86723395,86724228,86724287,86724436,86724714,86731779,86736468,86740948,86742375,86743647,86745634,86746048	PREDICTED.1671.1	chr1:86709156-86723300|chr1:86746048-86798937	0	0	1	0	0	0	0	0	2	0	0	0	0	0	1	0	0	0	0	0	0	0	0	0	0	0	0	0	0	0.993085	0	0	0
mmu_circ_002077	chr1_86740789_86746048_R	circRNA	Yes	chr1	86740789	86746048	-	682	5259	5	0,1518,2736,4713,5058	159,68,122,132,201	86740789,86742307,86743525,86745502,86745847	86740948,86742375,86743647,86745634,86746048	PREDICTED.1671.1	chr1:86736468-86740789|chr1:86746048-86798937	0	0	1	0	0	0	0	0	0	0	0	0	0	0	1	0	0	0	0	0	0	0	0	0	0	0	0	0	0	0.993085	0	0	0
mmu_circ_002078	chr1_86986091_86992044_F	circRNA	Yes	chr1	86986091	86992044	+	373	5953	4	0,2962,4792,5870	62,129,99,83	86986091,86989053,86990883,86991961	86986153,86989182,86990982,86992044	ENSMMUT00000004888	chr1:86950951-86986091|chr1:86992044-87003059	0	0	0	0	0	0	1	0	0	0	0	0	0	0	0	0	0	1	0	0	0	1	0	0	0	0	0.990325	0	0	0	0.430566	0	0.705287
mmu_circ_002081	chr1_87318078_87318459_F	circRNA	Yes*	chr1	87318078	87318459	+	286	381	2	0,149	54,232	87318078,87318227	87318132,87318459	ENSMMUT00000031197	chr1:87314529-87318078|chr1:87318459-87325589	0	0	0	0	0	0	0	0	0	0	0	0	0	0	0	1	0	0	0	0	0	0	0	0	0	0	0	0	0	0	0	0	0
mmu_circ_002084	chr1_88136968_88145603_R	circRNA	Yes	chr1	88136968	88145603	-	294	8635	3	0,1091,8535	120,74,100	88136968,88138059,88145503	88137088,88138133,88145603	ENSMMUT00000046781	chr1:88111619-88136968|chr1:88145603-88247791	0	0	0	0	0	0	0	0	0	0	0	0	0	0	0	0	0	0	2	0	0	0	0	0	1.22719	0	0	0	0	0	0	0	0
mmu_circ_002087	chr1_89101556_89105434_R	circRNA	Yes	chr1	89101556	89105434	-	296	3878	2	0,3692	110,186	89101556,89105248	89101666,89105434	ENSMMUT00000001953	chr1:89100277-89101556|chr1:89105434-89111303	1	0	0	0	0	0	0	0	0	0	0	0	0	0	1	0	0	0	0	0	0	0	0	0	0	1.04496	0	0	0	0	0	0	0
mmu_circ_002089	chr1_89427298_89431204_F	circRNA	Yes	chr1	89427298	89431204	+	271	3906	2	0,3777	142,129	89427298,89431075	89427440,89431204	PREDICTED.1404.1	chr1:89416455-89427298|chr1:89431204-89434118	0	0	0	0	0	0	0	0	0	0	0	0	1	2	0	0	0	0	0	0	0	0	0	0	0	0	0	0.688568	0	0	0	0	0
mmu_circ_002090	chr1_89427298_89435990_F	circRNA	Yes	chr1	89427298	89435990	+	498	8692	4	0,3777,6820,8599	142,129,134,93	89427298,89431075,89434118,89435897	89427440,89431204,89434252,89435990	PREDICTED.1404.1	chr1:89416455-89427298|chr1:89435990-89446083	2	0	2	0	2	0	1	2	0	0	1	0	0	0	2	1	0	0	0	0	0	0	0	0	0	2.08991	0.990325	0	0	1.98617	0	0	0
mmu_circ_002092	chr1_89431075_89435990_F	circRNA	Yes	chr1	89431075	89435990	+	356	4915	3	0,3043,4822	129,134,93	89431075,89434118,89435897	89431204,89434252,89435990	PREDICTED.1404.1	chr1:89427440-89431075|chr1:89435990-89446083	0	0	0	0	0	0	0	0	0	0	0	0	0	0	0	0	0	0	0	0	2	0	0	0	0	0	0	0	0	0	0	0	0
mmu_circ_002094	chr1_89434118_89435990_F	circRNA	Yes	chr1	89434118	89435990	+	227	1872	2	0,1779	134,93	89434118,89435897	89434252,89435990	PREDICTED.1404.1	chr1:89431204-89434118|chr1:89435990-89446083	0	0	0	0	0	0	2	0	0	0	0	0	0	0	1	0	0	1	0	1	0	0	0	0	0	0	1.98065	0	0	0	0	0	0.705287
mmu_circ_002095	chr1_89769071_89780101_F	circRNA	Yes	chr1	89769071	89780101	+	325	11030	2	0,10944	239,86	89769071,89780015	89769310,89780101	PREDICTED.2465.2	chr1:89608690-89769071|chr1:89780101-89793130	0	0	0	1	0	0	0	0	0	0	0	0	0	0	0	0	1	0	0	0	0	0	0	0	0	0	0	0	0	0	0	0	0
mmu_circ_002098	chr1_91463172_91463473_F	circRNA	Yes	chr1	91463172	91463473	+	301	301	1	0	301	91463172	91463473	PREDICTED.3799.2	chr1:91400215-91463172|chr1:91463473-91483471	0	0	0	0	0	0	0	0	0	0	0	0	0	0	0	0	2	0	0	0	0	1	0	0	0	0	0	0	0	0	0.430566	0	0
mmu_circ_002099	chr1_91463172_91483626_F	circRNA	Yes	chr1	91463172	91483626	+	456	20454	2	0,20299	301,155	91463172,91483471	91463473,91483626	PREDICTED.3799.2	chr1:91400215-91463172|chr1:91483626-91493855	0	0	1	0	0	0	0	0	0	0	0	0	0	1	0	0	1	0	0	0	0	0	0	0	0	0	0	0	0	0.993085	0	0	0
mmu_circ_002101	chr1_91493855_91495076_F	circRNA	Yes	chr1	91493855	91495076	+	478	1221	3	0,766,1007	118,146,214	91493855,91494621,91494862	91493973,91494767,91495076	PREDICTED.1296.1	chr1:91483626-91493855|chr1:91495076-91508115	0	0	0	0	0	0	0	1	0	0	0	1	0	0	1	0	0	0	0	0	0	0	0	0	0	0	0	0	0	0	0	0	0
mmu_circ_002102	chr1_91493855_91509725_F	circRNA	Yes	chr1	91493855	91509725	+	588	15870	4	0,766,1007,15760	118,146,214,110	91493855,91494621,91494862,91509615	91493973,91494767,91495076,91509725	ENSMMUT00000028967	chr1:91483626-91493855|chr1:91509725-91531202	0	0	0	2	0	0	0	0	0	0	0	0	0	0	0	0	0	0	0	0	0	0	1	0	0	0	0	0	0	0	0	0	0
mmu_circ_002104	chr1_91493855_91509725_F	circRNA	Yes	chr1	91493855	91509725	+	774	15870	5	0,766,1007,14260,15760	118,146,214,186,110	91493855,91494621,91494862,91508115,91509615	91493973,91494767,91495076,91508301,91509725	PREDICTED.2487.1	chr1:91483626-91493855|chr1:91509725-91531202	1	0	0	0	0	0	4	2	1	0	0	5	0	0	0	0	6	0	3	0	0	0	0	0	1.84079	1.04496	3.9613	0	0	0	0	0	0
mmu_circ_002107	chr1_91508115_91509725_F	circRNA	Yes	chr1	91508115	91509725	+	296	1610	2	0,1500	186,110	91508115,91509615	91508301,91509725	PREDICTED.1381.1	chr1:91495076-91508115|chr1:91509725-91531202	2	0	0	0	2	0	2	3	0	0	1	0	0	0	5	0	0	0	1	1	0	0	0	0	0.613597	2.08991	1.98065	0	0	0	0	0	0
mmu_circ_002111	chr1_9237942_9239720_R	circRNA	Yes	chr1	9237942	9239720	-	388	1778	2	0,1608	218,170	9237942,9239550	9238160,9239720	PREDICTED.407.1	chr1:9230370-9237942|chr1:9239720-9240960	0	0	0	0	0	0	1	0	0	0	0	0	0	0	0	0	1	0	0	0	0	0	0	0	0	0	0.990325	0	0	0	0	0	0
mmu_circ_002113	chr1_93643889_93689185_R	circRNA	Yes	chr1	93643889	93689185	-	3704	45296	3	0,790,45235	606,3037,61	93643889,93644679,93689124	93644495,93647716,93689185	ENSMMUT00000010693	chr1:93623546-93643889|chr1:93689185-93722323	2	0	0	0	1	3	0	0	2	0	0	0	0	0	0	0	0	0	0	1	1	0	0	0	0	2.08991	0	0	0	0	0	0	0
mmu_circ_002116	chr1_94751006_94790262_R	circRNA	Yes	chr1	94751006	94790262	-	323	39256	2	0,39071	138,185	94751006,94790077	94751144,94790262	PREDICTED.2430.3	chr1:94727495-94751006|chr1:94790262-94853525	0	0	0	0	0	0	0	0	0	0	0	0	0	0	0	0	0	2	0	0	0	0	0	0	0	0	0	0	0	0	0	0	1.41057
mmu_circ_002117	chr1_94853525_94853695_R	circRNA	Yes	chr1	94853525	94853695	-	170	170	1	0	170	94853525	94853695	PREDICTED.2838.3	chr1:94790262-94853525|chr1:94853695-94878051	1	0	0	0	0	0	2	0	0	0	0	0	0	4	2	0	0	0	0	0	0	0	0	0	0	1.04496	1.98065	0	0	0	0	0	0
mmu_circ_002119	chr1_95093510_95115475_F	circRNA	Yes	chr1	95093510	95115475	+	208	21965	2	0,21875	118,90	95093510,95115385	95093628,95115475	ENSMMUT00000003113	chr1:95088930-95093510|chr1:95115475-95118247	0	0	0	0	0	0	0	0	0	0	0	0	0	0	0	1	0	0	0	0	0	0	1	0	0	0	0	0	0	0	0	0	0
mmu_circ_002120	chr1_95320392_95333262_F	circRNA	Yes	chr1	95320392	95333262	+	233	12870	3	0,2971,12801	83,81,69	95320392,95323363,95333193	95320475,95323444,95333262	ENSMMUT00000014093	chr1:95311388-95320392|chr1:95333262-95368779	0	0	3	2	5	1	7	7	5	1	2	0	7	5	9	4	9	0	1	0	2	2	0	0	0.613597	0	6.93227	4.81997	0	2.97926	0.861132	0	0
mmu_circ_002121	chr1_95323363_95333262_F	circRNA	Yes	chr1	95323363	95333262	+	150	9899	2	0,9830	81,69	95323363,95333193	95323444,95333262	ENSMMUT00000014093	chr1:95320475-95323363|chr1:95333262-95368779	1	0	0	1	0	0	0	0	0	0	0	0	0	0	0	0	0	0	0	0	0	0	0	0	0	1.04496	0	0	0	0	0	0	0
mmu_circ_002125	chr1_95579194_95598684_R	circRNA	Yes*	chr1	95579194	95598684	-	543	19490	4	0,2251,17753,19349	96,147,159,141	95579194,95581445,95596947,95598543	95579290,95581592,95597106,95598684	PREDICTED.2659.2	chr1:95546181-95579194|chr1:95598684-95602848	0	0	0	0	0	0	0	0	0	0	0	0	0	0	1	0	0	0	0	0	0	0	0	0	0	0	0	0	0	0	0	0	0
mmu_circ_002126	chr1_95579194_95602983_R	circRNA	Yes	chr1	95579194	95602983	-	678	23789	5	0,2251,17753,19349,23654	96,147,159,141,135	95579194,95581445,95596947,95598543,95602848	95579290,95581592,95597106,95598684,95602983	PREDICTED.2865.1	chr1:95546181-95579194|chr1:95602983-95646743	0	0	0	0	0	0	1	1	0	0	0	0	0	0	0	0	0	2	0	0	0	0	0	0	0	0	0.990325	0	0	0	0	0	1.41057
mmu_circ_002128	chr1_95643768_95687954_R	circRNA	Yes	chr1	95643768	95687954	-	1243	44186	11	0,698,2975,15002,33181,33682,34691,37265,41572,42843,43996	147,33,54,61,98,90,144,126,75,225,190	95643768,95644466,95646743,95658770,95676949,95677450,95678459,95681033,95685340,95686611,95687764	95643915,95644499,95646797,95658831,95677047,95677540,95678603,95681159,95685415,95686836,95687954	ENSMMUT00000046709	chr1:95602983-95643768|chr1:95687954-95718444	0	0	0	0	0	0	0	0	0	0	0	1	2	0	3	0	0	0	0	0	0	0	0	0	0	0	0	1.37714	0	0	0	0	0
mmu_circ_002129	chr1_95644466_95687954_R	circRNA	Yes	chr1	95644466	95687954	-	1096	43488	10	0,2277,14304,32483,32984,33993,36567,40874,42145,43298	33,54,61,98,90,144,126,75,225,190	95644466,95646743,95658770,95676949,95677450,95678459,95681033,95685340,95686611,95687764	95644499,95646797,95658831,95677047,95677540,95678603,95681159,95685415,95686836,95687954	ENSMMUT00000046709	chr1:95643915-95644466|chr1:95687954-95718444	1	0	0	0	0	0	0	0	0	0	0	0	0	0	1	0	0	0	0	0	0	0	0	0	0	1.04496	0	0	0	0	0	0	0
mmu_circ_002130	chr1_95676949_95687954_R	circRNA	Yes	chr1	95676949	95687954	-	948	11005	7	0,501,1510,4084,8391,9662,10815	98,90,144,126,75,225,190	95676949,95677450,95678459,95681033,95685340,95686611,95687764	95677047,95677540,95678603,95681159,95685415,95686836,95687954	ENSMMUT00000046709	chr1:95658831-95676949|chr1:95687954-95718444	0	0	0	1	0	0	1	0	0	1	0	0	0	0	0	0	1	0	0	0	0	0	0	0	0	0	0.990325	0	0	0	0	0	0
mmu_circ_002132	chr1_95718444_95718674_R	circRNA	Yes	chr1	95718444	95718674	-	230	230	1	0	230	95718444	95718674	ENSMMUT00000046709	chr1:95687954-95718444|chr1:95718674-95780511	0	1	0	0	0	0	0	0	0	0	0	0	0	1	0	0	0	0	0	0	0	0	0	0	0	0	0	0	1.55173	0	0	0	0
mmu_circ_002133	chr1_95839406_95843469_R	circRNA	Yes	chr1	95839406	95843469	-	285	4063	2	0,3955	177,108	95839406,95843361	95839583,95843469	ENSMMUT00000007155	chr1:95836831-95839406|chr1:95843469-95870014	0	0	0	2	0	0	0	0	0	0	0	0	0	0	0	0	0	0	0	0	0	0	0	0	0	0	0	0	0	0	0	0	0
mmu_circ_002138	chr1_96572940_96578290_F	circRNA	Yes	chr1	96572940	96578290	+	487	5350	4	0,2769,3275,5201	110,133,95,149	96572940,96575709,96576215,96578141	96573050,96575842,96576310,96578290	PREDICTED.2621.1	chr1:96563751-96572940|chr1:96578290-96580130	0	0	0	0	0	0	2	0	0	0	0	0	0	0	0	0	0	0	0	0	1	0	0	0	0	0	1.98065	0	0	0	0	0	0
mmu_circ_002141	chr1_96594724_96595295_R	circRNA	Yes	chr1	96594724	96595295	-	325	571	2	0,459	213,112	96594724,96595183	96594937,96595295	ENSMMUT00000046678	chr1:96591664-96594724|chr1:96595295-96599078	1	0	0	0	0	0	1	1	0	0	1	0	0	0	0	0	1	1	1	0	0	0	0	0	0.613597	1.04496	0.990325	0	0	0	0	0	0.705287
mmu_circ_002143	chr1_9665426_9666834_R	circRNA	Yes	chr1	9665426	9666834	-	393	1408	3	0,482,1218	117,86,190	9665426,9665908,9666644	9665543,9665994,9666834	PREDICTED.306.2	chr1:9660551-9665426|chr1:9666834-9672456	0	0	1	0	0	0	0	0	1	0	0	0	0	1	0	0	1	0	0	0	0	0	0	0	0	0	0	0	0	0.993085	0	0	0
mmu_circ_002145	chr1_9690693_9705228_R	circRNA	Yes	chr1	9690693	9705228	-	306	14535	3	0,11275,14405	102,74,130	9690693,9701968,9705098	9690795,9702042,9705228	PREDICTED.275.2	chr1:9674949-9690693|chr1:9705228-9726321	0	0	0	0	0	0	0	0	0	0	0	0	1	0	0	0	0	1	0	0	0	0	0	0	0	0	0	0.688568	0	0	0	0	0.705287
mmu_circ_002146	chr1_96913302_96916546_R	circRNA	Yes	chr1	96913302	96916546	-	378	3244	3	0,1979,3184	115,203,60	96913302,96915281,96916486	96913417,96915484,96916546	ENSMMUT00000019447	chr1:96907667-96913302|chr1:96916546-96920226	0	0	0	0	0	0	0	0	0	0	0	0	1	0	0	0	0	0	0	0	3	0	0	0	0	0	0	0.688568	0	0	0	0	0
mmu_circ_002147	chr1_96913302_96916546_R	circRNA	Yes	chr1	96913302	96916546	-	559	3244	4	0,893,1979,3184	115,181,203,60	96913302,96914195,96915281,96916486	96913417,96914376,96915484,96916546	PREDICTED.2834.2	chr1:96907667-96913302|chr1:96916546-96920226	0	0	0	0	0	0	3	0	0	0	0	0	0	0	0	0	0	0	0	0	0	0	0	0	0	0	2.97097	0	0	0	0	0	0
mmu_circ_002149	chr1_97175804_97182465_R	circRNA	Yes*	chr1	97175804	97182465	-	808	6661	4	0,240,2129,6523	109,328,233,138	97175804,97176044,97177933,97182327	97175913,97176372,97178166,97182465	PREDICTED.2787.2	chr1:97172958-97175804|chr1:97182465-97183034	1	0	0	0	0	0	0	0	0	0	0	0	0	0	0	0	0	0	0	0	0	0	0	0	0	1.04496	0	0	0	0	0	0	0
mmu_circ_002151	chr1_97182327_97188258_R	circRNA	Yes	chr1	97182327	97188258	-	966	5931	7	0,707,1168,2336,4672,5051,5773	138,189,140,99,105,137,158	97182327,97183034,97183495,97184663,97186999,97187378,97188100	97182465,97183223,97183635,97184762,97187104,97187515,97188258	PREDICTED.2787.2	chr1:97178166-97182327|chr1:97188258-97199255	1	0	0	0	1	0	0	0	0	0	0	0	0	0	0	0	0	0	0	0	1	0	0	0	0	1.04496	0	0	0	0	0	0	0
mmu_circ_002152	chr1_97199255_97200813_R	circRNA	Yes	chr1	97199255	97200813	-	519	1558	4	0,853,1266,1447	138,189,81,111	97199255,97200108,97200521,97200702	97199393,97200297,97200602,97200813	PREDICTED.2889.2	chr1:97188258-97199255|chr1:97200813-97201520	0	0	0	0	0	0	2	0	0	0	0	0	0	0	0	0	0	0	0	0	0	0	0	0	0	0	1.98065	0	0	0	0	0	0
mmu_circ_002154	chr1_97217881_97230300_R	circRNA	Yes	chr1	97217881	97230300	-	372	12419	2	0,12182	135,237	97217881,97230063	97218016,97230300	PREDICTED.2350.4	chr1:97207572-97217881|chr1:97230300-97236380	0	0	0	0	1	0	0	0	1	0	0	3	2	0	1	0	2	0	0	2	0	0	0	0	0	0	0	1.37714	0	0	0	0	0
mmu_circ_002155	chr1_97217881_97230300_R	circRNA	Yes	chr1	97217881	97230300	-	484	12419	3	0,10458,12182	135,112,237	97217881,97228339,97230063	97218016,97228451,97230300	PREDICTED.2889.1	chr1:97207572-97217881|chr1:97230300-97246639	0	0	0	0	0	0	8	0	0	0	0	0	0	0	0	0	0	0	0	0	0	0	0	0	0	0	7.9226	0	0	0	0	0	0
mmu_circ_002156	chr1_97217881_97230300_R	circRNA	Yes	chr1	97217881	97230300	-	573	12419	4	0,5226,10458,12182	135,89,112,237	97217881,97223107,97228339,97230063	97218016,97223196,97228451,97230300	PREDICTED.2787.2	chr1:97207572-97217881|chr1:97230300-97246639	3	0	0	0	0	0	0	0	0	0	0	0	0	0	0	0	0	0	0	0	0	0	0	0	0	3.13487	0	0	0	0	0	0	0
mmu_circ_002159	chr1_97496406_97497928_F	circRNA	Yes	chr1	97496406	97497928	+	229	1522	3	0,178,1458	92,73,64	97496406,97496584,97497864	97496498,97496657,97497928	ENSMMUT00000019668	chr1:97494663-97496406|chr1:97497928-97505047	0	0	0	0	0	0	0	3	0	0	0	0	0	1	1	0	0	1	0	0	0	0	0	1	0	0	0	0	0	0	0	0.401374	0.705287
mmu_circ_002160	chr1_97496406_97506059_F	circRNA	Yes	chr1	97496406	97506059	+	583	9653	7	0,178,1458,8641,8824,8985,9533	92,73,64,78,66,90,120	97496406,97496584,97497864,97505047,97505230,97505391,97505939	97496498,97496657,97497928,97505125,97505296,97505481,97506059	PREDICTED.2323.2	chr1:97494663-97496406|chr1:97506059-97513180	0	0	0	0	0	0	0	0	0	0	0	0	2	0	0	0	0	0	0	0	0	0	0	0	0	0	0	1.37714	0	0	0	0	0
mmu_circ_002161	chr1_97505047_97506059_F	circRNA	Yes*	chr1	97505047	97506059	+	354	1012	4	0,183,344,892	78,66,90,120	97505047,97505230,97505391,97505939	97505125,97505296,97505481,97506059	ENSMMUT00000019668	chr1:97497928-97505047|chr1:97506059-97513180	0	0	0	0	0	0	0	0	0	0	0	0	0	0	0	0	0	1	0	0	0	0	0	0	0	0	0	0	0	0	0	0	0.705287
mmu_circ_002162	chr1_97922290_97922605_R	ciRNA	Yes	chr1	97922290	97922605	-	315	315	1	0	315	97922290	97922605	ENSMMUT00000002391	chr1:97922270-97922605	0	0	0	0	0	0	0	2	0	0	0	0	0	0	0	0	0	0	0	0	0	0	0	0	0	0	0	0	0	0	0	0	0
mmu_circ_002163	chr1_98173777_98179028_F	circRNA	Yes	chr1	98173777	98179028	+	256	5251	2	0,5161	166,90	98173777,98178938	98173943,98179028	PREDICTED.1483.1	chr1:98143259-98173777|chr1:98179028-98181604	0	0	0	0	0	0	0	0	0	0	0	0	0	1	3	0	1	0	0	0	1	0	0	0	0	0	0	0	0	0	0	0	0
mmu_circ_002164	chr1_98173777_98183127_F	circRNA	Yes	chr1	98173777	98183127	+	410	9350	4	0,5161,7827,9255	166,90,59,95	98173777,98178938,98181604,98183032	98173943,98179028,98181663,98183127	PREDICTED.1483.1	chr1:98143259-98173777|chr1:98183127-98202713	6	3	5	9	11	5	9	13	7	3	6	3	7	4	49	3	8	15	0	3	19	2	0	5	0	6.26973	8.91292	4.81997	4.65518	4.96543	0.861132	2.00687	10.5793
mmu_circ_002165	chr1_98173777_98202787_F	circRNA	Yes	chr1	98173777	98202787	+	484	29010	5	0,5161,7827,9255,28936	166,90,59,95,74	98173777,98178938,98181604,98183032,98202713	98173943,98179028,98181663,98183127,98202787	PREDICTED.1483.1	chr1:98143259-98173777|chr1:98202787-98220590	0	0	2	14	10	5	0	5	5	5	0	3	6	6	21	5	4	11	0	1	6	3	0	5	0	0	0	4.13141	0	1.98617	1.2917	2.00687	7.75816
mmu_circ_002166	chr1_98178938_98183127_F	circRNA	Yes	chr1	98178938	98183127	+	244	4189	3	0,2666,4094	90,59,95	98178938,98181604,98183032	98179028,98181663,98183127	PREDICTED.1483.1	chr1:98173943-98178938|chr1:98183127-98202713	0	0	0	2	0	1	0	0	1	0	0	0	1	1	2	0	0	4	0	0	2	0	1	0	0	0	0	0.688568	0	0	0	0	2.82115
mmu_circ_002167	chr1_98178938_98202787_F	circRNA	Yes	chr1	98178938	98202787	+	318	23849	4	0,2666,4094,23775	90,59,95,74	98178938,98181604,98183032,98202713	98179028,98181663,98183127,98202787	PREDICTED.1483.1	chr1:98173943-98178938|chr1:98202787-98220590	0	0	3	0	2	1	0	4	1	0	0	0	0	2	12	0	1	2	0	0	0	0	0	1	0	0	0	0	0	2.97926	0	0.401374	1.41057
mmu_circ_002169	chr1_99801349_99834121_F	circRNA	Yes	chr1	99801349	99834121	+	865	32772	6	0,17317,18308,25150,25401,32576	76,173,144,165,111,196	99801349,99818666,99819657,99826499,99826750,99833925	99801425,99818839,99819801,99826664,99826861,99834121	ENSMMUT00000022677	chr1:99772031-99801349|chr1:99834121-99852928	0	0	0	0	0	0	0	1	0	0	0	0	0	0	0	0	0	0	0	0	0	0	0	1	0	0	0	0	0	0	0	0.401374	0
mmu_circ_002172	chr1_99818666_99834121_F	circRNA	Yes	chr1	99818666	99834121	+	789	15455	5	0,991,7833,8084,15259	173,144,165,111,196	99818666,99819657,99826499,99826750,99833925	99818839,99819801,99826664,99826861,99834121	ENSMMUT00000022677	chr1:99801425-99818666|chr1:99834121-99852928	0	2	1	2	0	0	0	0	0	0	1	2	0	0	3	4	1	0	0	0	0	0	0	0	0	0	0	0	3.10345	0.993085	0	0	0
mmu_circ_002173	chr1_99826499_99834121_F	circRNA	Yes*	chr1	99826499	99834121	+	472	7622	3	0,251,7426	165,111,196	99826499,99826750,99833925	99826664,99826861,99834121	ENSMMUT00000022677	chr1:99819801-99826499|chr1:99834121-99852928	0	0	0	0	0	0	0	0	0	0	0	0	0	0	0	1	0	0	0	0	0	0	0	0	0	0	0	0	0	0	0	0	0
mmu_circ_002174	chr10_1164173_1165694_F	circRNA	Yes	chr10	1164173	1165694	+	1521	1521	1	0	1521	1164173	1165694	ENSMMUT00000045241	chr10:1153457-1164173|chr10:1165694-1170319	0	1	1	0	0	0	0	0	0	0	1	0	0	0	0	0	0	0	3	0	0	0	0	0	1.84079	0	0	0	1.55173	0.993085	0	0	0
mmu_circ_002176	chr10_12790045_12792055_F	circRNA	Yes	chr10	12790045	12792055	+	238	2010	2	0,1849	77,161	12790045,12791894	12790122,12792055	ENSMMUT00000001313	chr10:12777799-12790045|chr10:12792055-12794960	0	0	0	1	0	0	0	0	0	0	0	0	0	0	0	0	1	0	0	0	0	0	0	0	0	0	0	0	0	0	0	0	0
mmu_circ_002177	chr10_12850473_12855860_F	circRNA	Yes	chr10	12850473	12855860	+	330	5387	3	0,3743,5278	156,65,109	12850473,12854216,12855751	12850629,12854281,12855860	ENSMMUT00000001313	chr10:12846811-12850473|chr10:12855860-12856771	0	0	0	0	0	0	0	0	0	0	0	0	1	1	0	0	0	1	0	0	0	0	0	0	0	0	0	0.688568	0	0	0	0	0.705287
mmu_circ_002178	chr10_12940089_12946692_F	circRNA	Yes	chr10	12940089	12946692	+	1202	6603	2	0,6431	1030,172	12940089,12946520	12941119,12946692	ENSMMUT00000017752	chr10:12921915-12940089|chr10:12946692-12988126	1	0	0	0	0	0	1	0	0	0	0	0	0	0	0	0	0	0	0	0	0	0	0	0	0	1.04496	0.990325	0	0	0	0	0	0
mmu_circ_002180	chr10_13509827_13518761_F	circRNA	Yes	chr10	13509827	13518761	+	333	8934	5	0,3892,5623,5785,8838	100,34,77,26,96	13509827,13513719,13515450,13515612,13518665	13509927,13513753,13515527,13515638,13518761	ENSMMUT00000003921	chr10:13506815-13509827|chr10:13518761-13519739	0	0	0	0	0	0	0	0	0	0	0	0	0	2	0	0	0	0	0	0	0	0	0	0	0	0	0	0	0	0	0	0	0
mmu_circ_002184	chr10_14533907_14537520_R	circRNA	Yes	chr10	14533907	14537520	-	330	3613	3	0,2744,3506	108,115,107	14533907,14536651,14537413	14534015,14536766,14537520	ENSMMUT00000001088	chr10:14531352-14533907|chr10:14537520-14541158	0	0	0	0	1	0	0	0	0	0	0	0	1	0	0	0	0	0	0	0	0	0	0	0	0	0	0	0.688568	0	0	0	0	0
mmu_circ_002191	chr10_14824787_14831712_F	circRNA	Yes	chr10	14824787	14831712	+	655	6925	5	0,944,2927,3822,6823	125,117,188,123,102	14824787,14825731,14827714,14828609,14831610	14824912,14825848,14827902,14828732,14831712	PREDICTED.3648.1	chr10:14821484-14824787|chr10:14831712-14832878	0	0	0	0	0	0	1	0	1	0	0	0	0	1	0	0	1	0	0	0	0	0	0	0	0	0	0.990325	0	0	0	0	0	0
mmu_circ_002192	chr10_14827714_14828732_F	circRNA	Yes	chr10	14827714	14828732	+	311	1018	2	0,895	188,123	14827714,14828609	14827902,14828732	PREDICTED.3648.1	chr10:14825848-14827714|chr10:14828732-14831610	0	0	0	0	0	0	1	0	0	0	0	0	0	0	0	0	2	0	0	0	0	0	0	0	0	0	0.990325	0	0	0	0	0	0
mmu_circ_002193	chr10_15202370_15204179_F	circRNA	Yes	chr10	15202370	15204179	+	1809	1809	1	0	1809	15202370	15204179	PREDICTED.6398.1	chr10:15198447-15202370|chr10:15204179-15207439	1	0	0	0	0	0	1	0	0	0	0	0	1	0	0	0	0	0	0	0	0	0	0	0	0	1.04496	0.990325	0.688568	0	0	0	0	0
mmu_circ_002195	chr10_15328064_15359154_F	circRNA	Yes	chr10	15328064	15359154	+	693	31090	4	0,12480,14437,30991	289,139,166,99	15328064,15340544,15342501,15359055	15328353,15340683,15342667,15359154	PREDICTED.6086.1	chr10:15319147-15328064|chr10:15359154-15371123	0	0	0	0	3	0	0	3	0	0	0	0	0	2	0	0	0	0	0	0	0	0	0	0	0	0	0	0	0	0	0	0	0
mmu_circ_002196	chr10_15328064_15359154_F	circRNA	Yes	chr10	15328064	15359154	+	754	31090	5	0,8064,12480,14437,30991	289,61,139,166,99	15328064,15336128,15340544,15342501,15359055	15328353,15336189,15340683,15342667,15359154	PREDICTED.6394.3	chr10:15319147-15328064|chr10:15359154-15371123	0	0	0	0	0	0	3	0	0	0	0	0	0	0	0	0	0	0	0	0	0	0	0	0	0	0	2.97097	0	0	0	0	0	0
mmu_circ_002197	chr10_15340544_15359154_F	circRNA	Yes	chr10	15340544	15359154	+	404	18610	3	0,1957,18511	139,166,99	15340544,15342501,15359055	15340683,15342667,15359154	ENSMMUT00000003261	chr10:15328353-15340544|chr10:15359154-15371123	0	0	0	1	0	0	0	0	0	0	0	0	2	0	0	0	0	0	0	0	0	0	0	0	0	0	0	1.37714	0	0	0	0	0
mmu_circ_002201	chr10_15399000_15403765_R	circRNA	Yes	chr10	15399000	15403765	-	645	4765	5	0,685,3392,4488,4667	232,147,82,86,98	15399000,15399685,15402392,15403488,15403667	15399232,15399832,15402474,15403574,15403765	ENSMMUT00000027581	chr10:15397324-15399000|chr10:15403765-15404749	0	0	0	0	1	0	1	0	0	0	0	0	0	0	0	0	0	0	0	0	0	0	0	0	0	0	0.990325	0	0	0	0	0	0
mmu_circ_002203	chr10_15403488_15406475_R	circRNA	Yes	chr10	15403488	15406475	-	642	2987	5	0,179,1261,1610,2889	86,98,209,151,98	15403488,15403667,15404749,15405098,15406377	15403574,15403765,15404958,15405249,15406475	ENSMMUT00000027581	chr10:15402474-15403488|chr10:15406475-15409049	1	0	0	0	1	0	1	0	0	0	0	0	0	1	0	0	0	0	1	0	0	0	0	0	0.613597	1.04496	0.990325	0	0	0	0	0	0
mmu_circ_002205	chr10_15403488_15410415_R	circRNA	Yes*	chr10	15403488	15410415	-	883	6927	7	0,179,1261,1610,2889,5561,6790	86,98,209,151,98,104,137	15403488,15403667,15404749,15405098,15406377,15409049,15410278	15403574,15403765,15404958,15405249,15406475,15409153,15410415	ENSMMUT00000027581	chr10:15402474-15403488|chr10:15410415-15415744	0	0	0	0	1	0	0	0	0	0	0	0	0	0	0	0	0	0	0	0	0	0	0	0	0	0	0	0	0	0	0	0	0
mmu_circ_002206	chr10_15404749_15406475_R	circRNA	Yes	chr10	15404749	15406475	-	458	1726	3	0,349,1628	209,151,98	15404749,15405098,15406377	15404958,15405249,15406475	ENSMMUT00000027581	chr10:15403765-15404749|chr10:15406475-15409049	1	0	0	0	0	0	2	0	0	0	0	0	0	1	0	0	1	0	0	0	0	1	0	0	0	1.04496	1.98065	0	0	0	0.430566	0	0
mmu_circ_002208	chr10_15420598_15421009_R	circRNA	Yes*	chr10	15420598	15421009	-	298	411	2	0,243	130,168	15420598,15420841	15420728,15421009	PREDICTED.3923.1	chr10:15418668-15420598|chr10:15421009-15422952	0	0	0	0	0	0	0	0	0	0	0	0	0	1	0	0	0	0	0	0	0	0	0	0	0	0	0	0	0	0	0	0	0
mmu_circ_002209	chr10_15420598_15425866_R	circRNA	Yes	chr10	15420598	15425866	-	590	5268	5	0,243,2354,3845,5177	130,168,93,108,91	15420598,15420841,15422952,15424443,15425775	15420728,15421009,15423045,15424551,15425866	ENSMMUT00000027581	chr10:15419201-15420598|chr10:15425866-15426530	0	0	0	0	0	0	0	0	1	0	0	0	1	0	0	0	0	0	0	0	0	0	0	0	0	0	0	0.688568	0	0	0	0	0
mmu_circ_002210	chr10_15422952_15425866_R	circRNA	Yes	chr10	15422952	15425866	-	292	2914	3	0,1491,2823	93,108,91	15422952,15424443,15425775	15423045,15424551,15425866	ENSMMUT00000027581	chr10:15421009-15422952|chr10:15425866-15426530	0	0	0	0	0	0	2	0	0	0	0	0	0	0	0	0	0	0	0	0	0	0	0	0	0	0	1.98065	0	0	0	0	0	0
mmu_circ_002211	chr10_15425775_15426849_R	circRNA	Yes	chr10	15425775	15426849	-	339	1074	3	0,755,972	91,146,102	15425775,15426530,15426747	15425866,15426676,15426849	ENSMMUT00000027581	chr10:15424551-15425775|chr10:15426849-15429650	0	0	0	0	0	0	1	0	0	0	0	1	0	0	0	0	0	0	0	0	0	0	0	0	0	0	0.990325	0	0	0	0	0	0
mmu_circ_002212	chr10_15426530_15432896_R	circRNA	Yes	chr10	15426530	15432896	-	487	6366	4	0,217,3120,6270	146,102,143,96	15426530,15426747,15429650,15432800	15426676,15426849,15429793,15432896	ENSMMUT00000027581	chr10:15425866-15426530|chr10:15432896-15444554	0	0	0	0	0	0	1	0	0	0	0	0	0	0	1	0	0	0	0	0	0	0	0	0	0	0	0.990325	0	0	0	0	0	0
mmu_circ_002215	chr10_15462553_15468233_R	circRNA	Yes	chr10	15462553	15468233	-	439	5680	3	0,3586,5549	139,169,131	15462553,15466139,15468102	15462692,15466308,15468233	PREDICTED.5854.2	chr10:15459192-15462553|chr10:15468233-15473876	0	0	0	0	0	0	0	0	0	0	0	0	0	0	0	1	0	0	0	0	0	0	0	1	0	0	0	0	0	0	0	0.401374	0
mmu_circ_002217	chr10_15493500_15502407_R	circRNA	Yes	chr10	15493500	15502407	-	448	8907	4	0,2066,5326,8748	41,100,148,159	15493500,15495566,15498826,15502248	15493541,15495666,15498974,15502407	PREDICTED.5854.1	chr10:15493398-15493500|chr10:15502407-15504032	0	0	0	0	0	0	0	0	0	0	0	0	0	0	0	2	0	0	0	0	0	0	0	0	0	0	0	0	0	0	0	0	0
mmu_circ_002218	chr10_15493500_15508635_R	circRNA	Yes*	chr10	15493500	15508635	-	1192	15135	9	0,2066,5326,8748,10532,10780,11552,11827,14929	41,100,148,159,129,152,172,85,206	15493500,15495566,15498826,15502248,15504032,15504280,15505052,15505327,15508429	15493541,15495666,15498974,15502407,15504161,15504432,15505224,15505412,15508635	ENSMMUT00000027578	chr10:15493398-15493500|chr10:15508635-15509174	0	0	0	0	0	0	0	0	0	0	0	0	0	0	0	0	0	0	0	1	0	0	0	0	0	0	0	0	0	0	0	0	0
mmu_circ_002219	chr10_15498826_15509286_R	circRNA	Yes*	chr10	15498826	15509286	-	1163	10460	8	0,3422,5206,5454,6226,6501,9603,10348	148,159,129,152,172,85,206,112	15498826,15502248,15504032,15504280,15505052,15505327,15508429,15509174	15498974,15502407,15504161,15504432,15505224,15505412,15508635,15509286	ENSMMUT00000027578	chr10:15495666-15498826|chr10:15509286-15517753	0	0	0	0	0	0	0	0	0	0	0	0	0	0	0	0	0	0	0	0	1	0	0	0	0	0	0	0	0	0	0	0	0
mmu_circ_002223	chr10_16827964_16839031_R	circRNA	Yes	chr10	16827964	16839031	-	881	11067	6	0,6341,6615,7188,9199,10894	141,102,189,175,101,173	16827964,16834305,16834579,16835152,16837163,16838858	16828105,16834407,16834768,16835327,16837264,16839031	ENSMMUT00000016845	chr10:16827550-16827964|chr10:16839031-16840607	4	1	0	0	0	0	2	0	0	0	0	0	3	0	0	1	2	4	0	0	1	0	0	2	0	4.17982	1.98065	2.0657	1.55173	0	0	0.802748	2.82115
mmu_circ_002225	chr10_17170786_17175428_F	circRNA	Yes	chr10	17170786	17175428	+	333	4642	2	0,4528	219,114	17170786,17175314	17171005,17175428	ENSMMUT00000022057	chr10:17159824-17170786|chr10:17175428-17178640	0	0	0	0	0	0	0	0	0	0	0	0	0	0	1	0	0	1	0	0	0	0	0	0	0	0	0	0	0	0	0	0	0.705287
mmu_circ_002227	chr10_17170861_17180506_F	circRNA	Yes*	chr10	17170861	17180506	+	439	9645	4	0,4453,7779,9557	144,114,93,88	17170861,17175314,17178640,17180418	17171005,17175428,17178733,17180506	ENSMMUT00000045065	chr10:17159824-17170861|chr10:17180506-17183352	0	0	0	0	0	0	0	0	0	0	1	0	0	0	0	0	0	0	0	0	0	0	0	0	0	0	0	0	0	0	0	0	0
mmu_circ_002228	chr10_17175314_17178733_F	circRNA	Yes	chr10	17175314	17178733	+	207	3419	2	0,3326	114,93	17175314,17178640	17175428,17178733	ENSMMUT00000045065	chr10:17171005-17175314|chr10:17178733-17180418	0	0	0	0	0	0	0	0	0	0	0	0	0	1	1	0	0	0	0	0	0	0	0	0	0	0	0	0	0	0	0	0	0
mmu_circ_002229	chr10_17175314_17180506_F	circRNA	Yes	chr10	17175314	17180506	+	295	5192	3	0,3326,5104	114,93,88	17175314,17178640,17180418	17175428,17178733,17180506	ENSMMUT00000045065	chr10:17171005-17175314|chr10:17180506-17183352	1	0	0	0	0	0	0	1	0	0	0	0	0	1	0	2	0	0	0	0	0	0	0	1	0	1.04496	0	0	0	0	0	0.401374	0
mmu_circ_002232	chr10_17178640_17183408_F	circRNA	Yes	chr10	17178640	17183408	+	237	4768	3	0,1778,4712	93,88,56	17178640,17180418,17183352	17178733,17180506,17183408	PREDICTED.6181.1	chr10:17175428-17178640|chr10:17183408-17187281	0	0	0	0	0	0	0	0	0	1	0	0	0	0	0	0	0	1	0	0	0	0	0	0	0	0	0	0	0	0	0	0	0.705287
mmu_circ_002234	chr10_17180418_17188784_F	circRNA	Yes	chr10	17180418	17188784	+	338	8366	4	0,2934,6863,8250	88,56,78,116	17180418,17183352,17187281,17188668	17180506,17183408,17187359,17188784	PREDICTED.4048.4	chr10:17178733-17180418|chr10:17188784-17193860	0	0	0	2	0	0	0	0	0	0	0	0	0	0	0	0	0	0	0	0	0	0	0	0	0	0	0	0	0	0	0	0	0
mmu_circ_002235	chr10_17183352_17188784_F	circRNA	Yes*	chr10	17183352	17188784	+	250	5432	3	0,3929,5316	56,78,116	17183352,17187281,17188668	17183408,17187359,17188784	PREDICTED.6451.2	chr10:17180506-17183352|chr10:17188784-17193860	1	0	0	0	0	0	0	0	0	0	0	0	0	0	0	0	0	0	0	0	0	0	0	0	0	1.04496	0	0	0	0	0	0	0
mmu_circ_002236	chr10_17183352_17194342_F	circRNA	Yes	chr10	17183352	17194342	+	732	10990	4	0,3929,5316,10508	56,78,116,482	17183352,17187281,17188668,17193860	17183408,17187359,17188784,17194342	ENSMMUT00000022057	chr10:17180506-17183352|chr10:17194342-17208263	0	0	0	0	0	0	0	0	1	0	0	0	0	0	1	0	0	0	0	0	0	0	0	0	0	0	0	0	0	0	0	0	0
mmu_circ_002237	chr10_17187281_17188784_F	circRNA	Yes	chr10	17187281	17188784	+	194	1503	2	0,1387	78,116	17187281,17188668	17187359,17188784	ENSMMUT00000045065	chr10:17183408-17187281|chr10:17188784-17193860	1	0	0	0	0	0	1	0	0	1	1	0	0	0	0	1	0	0	0	0	0	0	0	0	0	1.04496	0.990325	0	0	0	0	0	0
mmu_circ_002239	chr10_17187281_17208404_F	circRNA	Yes	chr10	17187281	17208404	+	817	21123	4	0,1387,6579,20982	78,116,482,141	17187281,17188668,17193860,17208263	17187359,17188784,17194342,17208404	PREDICTED.6451.5	chr10:17183408-17187281|chr10:17208404-17221321	1	0	0	0	0	0	0	0	0	0	0	0	0	0	0	0	0	1	0	0	0	0	0	0	0	1.04496	0	0	0	0	0	0	0.705287
mmu_circ_002240	chr10_17193860_17208404_F	circRNA	Yes*	chr10	17193860	17208404	+	623	14544	2	0,14403	482,141	17193860,17208263	17194342,17208404	PREDICTED.5452.2	chr10:17188784-17193860|chr10:17208404-17221321	0	0	0	0	0	0	0	0	0	0	0	0	0	0	0	0	0	0	0	0	0	0	0	1	0	0	0	0	0	0	0	0.401374	0
mmu_circ_002241	chr10_17208263_17224729_F	circRNA	Yes*	chr10	17208263	17224729	+	804	16466	3	0,13058,15956	141,153,510	17208263,17221321,17224219	17208404,17221474,17224729	PREDICTED.4823.2	chr10:17194342-17208263|chr10:17224729-17231678	0	0	0	0	0	0	0	0	0	0	0	1	0	0	0	0	0	0	0	0	0	0	0	0	0	0	0	0	0	0	0	0	0
mmu_circ_002242	chr10_17224219_17224729_F	circRNA	Yes	chr10	17224219	17224729	+	510	510	1	0	510	17224219	17224729	ENSMMUT00000045065	chr10:17221474-17224219|chr10:17224729-17231678	0	0	0	0	0	0	0	1	1	0	0	0	1	0	1	0	0	0	0	0	0	1	0	0	0	0	0	0.688568	0	0	0.430566	0	0
mmu_circ_002244	chr10_17243666_17246612_F	circRNA	Yes	chr10	17243666	17246612	+	319	2946	2	0,2706	79,240	17243666,17246372	17243745,17246612	ENSMMUT00000022053	chr10:17241221-17243666|chr10:17246612-17249097	0	0	0	0	0	0	0	0	0	0	0	0	1	0	0	0	0	2	0	0	0	0	0	0	0	0	0	0.688568	0	0	0	0	1.41057
mmu_circ_002246	chr10_17398477_17400702_R	circRNA	Yes	chr10	17398477	17400702	-	246	2225	2	0,2157	178,68	17398477,17400634	17398655,17400702	ENSMMUT00000045057	chr10:17383564-17398477|chr10:17400702-17458822	0	0	0	0	0	0	0	0	0	0	1	0	0	0	0	1	0	0	0	0	0	0	0	0	0	0	0	0	0	0	0	0	0
mmu_circ_002248	chr10_18126126_18130738_F	circRNA	Yes*	chr10	18126126	18130738	+	1060	4612	4	0,910,1090,4484	803,84,45,128	18126126,18127036,18127216,18130610	18126929,18127120,18127261,18130738	PREDICTED.5123.3	chr10:18125425-18126126|chr10:18130738-18131805	0	0	0	0	0	0	0	0	0	1	0	0	0	0	0	0	0	0	0	0	0	0	0	0	0	0	0	0	0	0	0	0	0
mmu_circ_002251	chr10_18413905_18414232_F	circRNA	Yes	chr10	18413905	18414232	+	327	327	1	0	327	18413905	18414232	ENSMMUT00000045017	chr10:18404647-18413905|chr10:18414232-18416135	0	0	0	0	0	0	0	0	0	0	0	0	0	0	0	0	0	1	0	0	0	0	0	2	0	0	0	0	0	0	0	0.802748	0.705287
mmu_circ_002253	chr10_18542669_18542889_F	ciRNA	Yes	chr10	18542669	18542889	+	220	220	1	0	220	18542669	18542889	ENSMMUT00000019245	chr10:18542669-18542910	0	0	0	0	0	0	0	3	1	0	0	0	0	0	0	0	0	0	0	0	0	0	0	0	0	0	0	0	0	0	0	0	0
mmu_circ_002256	chr10_19411849_19435746_R	circRNA	Yes*	chr10	19411849	19435746	-	777	23897	6	0,17556,18388,21609,23587,23729	158,187,129,65,70,168	19411849,19429405,19430237,19433458,19435436,19435578	19412007,19429592,19430366,19433523,19435506,19435746	ENSMMUT00000018534	chr10:19362773-19411849|chr10:19435746-19443559	0	0	0	0	0	0	0	0	0	0	0	0	0	0	0	1	0	0	0	0	0	0	0	0	0	0	0	0	0	0	0	0	0
mmu_circ_002257	chr10_19411849_19453129_R	circRNA	Yes	chr10	19411849	19453129	-	1258	41280	8	0,17556,18388,21609,23587,31710,37731,41151	158,187,129,65,310,165,115,129	19411849,19429405,19430237,19433458,19435436,19443559,19449580,19453000	19412007,19429592,19430366,19433523,19435746,19443724,19449695,19453129	PREDICTED.3976.1	chr10:19362773-19411849|chr10:19453129-19459428	0	0	0	0	0	0	0	0	0	0	0	0	0	0	0	0	0	2	0	0	0	0	0	0	0	0	0	0	0	0	0	0	1.41057
mmu_circ_002259	chr10_19443559_19449695_R	circRNA	Yes	chr10	19443559	19449695	-	280	6136	2	0,6021	165,115	19443559,19449580	19443724,19449695	ENSMMUT00000018534	chr10:19435746-19443559|chr10:19449695-19453000	0	0	0	0	0	0	0	0	0	0	0	0	0	1	0	0	0	0	0	0	1	0	0	0	0	0	0	0	0	0	0	0	0
mmu_circ_002266	chr10_19935519_19937218_F	circRNA	Yes	chr10	19935519	19937218	+	274	1699	2	0,1619	194,80	19935519,19937138	19935713,19937218	PREDICTED.8204.1	chr10:19934647-19935519|chr10:19937218-19938772	0	0	0	0	0	0	0	0	0	0	0	0	0	1	0	0	1	0	0	0	0	0	0	0	0	0	0	0	0	0	0	0	0
mmu_circ_002268	chr10_19944285_19945380_F	circRNA	Yes*	chr10	19944285	19945380	+	272	1095	2	0,914	91,181	19944285,19945199	19944376,19945380	PREDICTED.8204.1	chr10:19942351-19944285|chr10:19945380-19948216	0	0	0	0	0	0	0	0	0	0	0	0	0	0	1	0	0	0	0	0	0	0	0	0	0	0	0	0	0	0	0	0	0
mmu_circ_002273	chr10_20826888_20830029_R	circRNA	Yes	chr10	20826888	20830029	-	224	3141	2	0,3072	155,69	20826888,20829960	20827043,20830029	ENSMMUT00000044940	chr10:20817787-20826888|chr10:20830029-20831884	0	0	0	0	0	0	0	1	0	0	0	0	0	0	1	0	0	0	0	0	0	0	0	0	0	0	0	0	0	0	0	0	0
mmu_circ_002280	chr10_2252668_2255206_R	circRNA	Yes	chr10	2252668	2255206	-	253	2538	2	0,2409	124,129	2252668,2255077	2252792,2255206	ENSMMUT00000017707	chr10:2250343-2252668|chr10:2255206-2257689	0	0	0	0	0	0	0	0	0	0	0	0	0	2	0	0	0	0	0	0	0	0	0	0	0	0	0	0	0	0	0	0	0
mmu_circ_002282	chr10_22921059_22941324_F	circRNA	Yes	chr10	22921059	22941324	+	819	20265	3	0,18225,20115	521,148,150	22921059,22939284,22941174	22921580,22939432,22941324	PREDICTED.5566.1	chr10:22903444-22921059|chr10:22941324-22954937	0	0	0	0	0	0	0	0	0	0	0	0	1	0	1	0	0	0	0	0	0	0	0	0	0	0	0	0.688568	0	0	0	0	0
mmu_circ_002283	chr10_22939284_22941324_F	circRNA	Yes	chr10	22939284	22941324	+	298	2040	2	0,1890	148,150	22939284,22941174	22939432,22941324	ENSMMUT00000028780	chr10:22921580-22939284|chr10:22941324-22954937	0	0	0	2	0	0	4	0	0	0	0	1	0	0	0	1	0	1	1	0	0	0	2	0	0.613597	0	3.9613	0	0	0	0	0	0.705287
mmu_circ_002284	chr10_22960927_22961334_F	circRNA	Yes	chr10	22960927	22961334	+	222	407	2	0,272	87,135	22960927,22961199	22961014,22961334	PREDICTED.6594.2	chr10:22956859-22960927|chr10:22961334-22963047	1	0	0	0	1	0	0	0	0	0	0	0	1	0	0	0	0	0	0	0	0	0	0	0	0	1.04496	0	0.688568	0	0	0	0	0
mmu_circ_002289	chr10_23354467_23363984_R	circRNA	Yes	chr10	23354467	23363984	-	694	9517	5	0,1108,3014,4327,9401	145,188,123,122,116	23354467,23355575,23357481,23358794,23363868	23354612,23355763,23357604,23358916,23363984	ENSMMUT00000015533	chr10:23344177-23354467|chr10:23363984-23372213	4	0	0	0	2	0	0	0	0	0	0	0	1	0	2	0	0	0	1	1	0	0	0	0	0.613597	4.17982	0	0.688568	0	0	0	0	0
mmu_circ_002290	chr10_23358794_23363984_R	circRNA	Yes	chr10	23358794	23363984	-	238	5190	2	0,5074	122,116	23358794,23363868	23358916,23363984	ENSMMUT00000015533	chr10:23357604-23358794|chr10:23363984-23372213	0	1	0	0	0	0	1	0	0	0	0	0	0	0	0	0	0	0	0	0	0	0	0	0	0	0	0.990325	0	1.55173	0	0	0	0
mmu_circ_002296	chr10_2405573_2406187_F	ciRNA	Yes	chr10	2405573	2406187	+	614	614	1	0	614	2405573	2406187	PREDICTED.3591.2	chr10:2405573-2406187	0	0	0	1	0	0	0	0	0	0	0	0	0	0	0	1	0	0	0	0	0	0	0	0	0	0	0	0	0	0	0	0	0
mmu_circ_002297	chr10_2413915_2414890_R	circRNA	Yes	chr10	2413915	2414890	-	313	975	2	0,813	151,162	2413915,2414728	2414066,2414890	PREDICTED.3349.2	chr10:2412155-2413915|chr10:2414890-2415126	0	0	0	0	1	0	0	0	0	0	0	0	1	0	0	0	0	0	0	0	0	0	0	0	0	0	0	0.688568	0	0	0	0	0
mmu_circ_002298	chr10_25893779_25908064_R	circRNA	Yes*	chr10	25893779	25908064	-	993	14285	6	0,2846,4950,7288,12868,14102	210,153,107,188,152,183	25893779,25896625,25898729,25901067,25906647,25907881	25893989,25896778,25898836,25901255,25906799,25908064	ENSMMUT00000044899	chr10:25889568-25893779|chr10:25908064-25913259	0	0	0	0	0	0	0	0	0	0	0	0	0	0	0	1	0	0	0	0	0	0	0	0	0	0	0	0	0	0	0	0	0
mmu_circ_002299	chr10_25898729_25901255_R	circRNA	Yes	chr10	25898729	25901255	-	295	2526	2	0,2338	107,188	25898729,25901067	25898836,25901255	PREDICTED.4081.2	chr10:25896778-25898729|chr10:25901255-25906647	0	0	0	0	0	0	0	0	0	0	0	0	0	0	0	0	0	4	0	0	0	0	0	0	0	0	0	0	0	0	0	0	2.82115
mmu_circ_002303	chr10_25915598_25916969_R	circRNA	Yes	chr10	25915598	25916969	-	195	1371	2	0,1306	130,65	25915598,25916904	25915728,25916969	PREDICTED.10558.3	chr10:25913381-25915598|chr10:25916969-25920823	0	0	0	0	1	0	0	0	0	0	0	0	1	1	1	0	0	0	0	0	0	0	0	0	0	0	0	0.688568	0	0	0	0	0
mmu_circ_002304	chr10_25915598_25925370_R	circRNA	Yes	chr10	25915598	25925370	-	828	9772	6	0,1306,5225,5760,6326,9570	130,65,148,115,168,202	25915598,25916904,25920823,25921358,25921924,25925168	25915728,25916969,25920971,25921473,25922092,25925370	ENSMMUT00000044899	chr10:25913381-25915598|chr10:25925370-25928864	0	0	0	0	0	0	1	0	0	0	0	0	1	0	1	0	0	1	1	1	1	0	0	0	0.613597	0	0.990325	0.688568	0	0	0	0	0.705287
mmu_circ_002308	chr10_25937000_25947429_R	circRNA	Yes	chr10	25937000	25947429	-	319	10429	2	0,10242	132,187	25937000,25947242	25937132,25947429	ENSMMUT00000044899	chr10:25930891-25937000|chr10:25947429-25949712	0	0	0	0	0	1	0	0	1	0	0	0	0	0	1	0	1	0	1	0	1	0	0	0	0.613597	0	0	0	0	0	0	0	0
mmu_circ_002309	chr10_25937000_25949876_R	circRNA	Yes	chr10	25937000	25949876	-	483	12876	3	0,10242,12712	132,187,164	25937000,25947242,25949712	25937132,25947429,25949876	ENSMMUT00000044899	chr10:25930891-25937000|chr10:25949876-25954388	0	0	0	0	0	0	0	1	0	0	1	0	1	2	1	0	0	0	1	0	0	0	0	1	0.613597	0	0	0.688568	0	0	0	0.401374	0
mmu_circ_002310	chr10_26394822_26394998_R	circRNA	Yes	chr10	26394822	26394998	-	176	176	1	0	176	26394822	26394998	ENSMMUT00000026603	chr10:26372117-26394822|chr10:26394998-26401567	0	0	0	0	0	1	0	0	1	0	0	1	0	2	0	1	0	0	0	0	0	0	0	0	0	0	0	0	0	0	0	0	0
mmu_circ_002311	chr10_26394822_26403571_R	circRNA	Yes	chr10	26394822	26403571	-	416	8749	3	0,6745,8636	176,127,113	26394822,26401567,26403458	26394998,26401694,26403571	ENSMMUT00000026603	chr10:26372117-26394822|chr10:26403571-26412602	1	0	4	0	1	0	0	3	0	0	1	0	7	2	4	0	5	3	0	0	3	0	3	1	0	1.04496	0	4.81997	0	3.97234	0	0.401374	2.11586
mmu_circ_002312	chr10_26394822_26420319_R	circRNA	Yes	chr10	26394822	26420319	-	680	25497	5	0,6745,8636,17780,25367	176,127,113,134,130	26394822,26401567,26403458,26412602,26420189	26394998,26401694,26403571,26412736,26420319	ENSMMUT00000026603	chr10:26372117-26394822|chr10:26420319-26426594	1	0	0	1	0	0	0	0	0	0	0	0	0	0	0	0	0	0	0	0	0	0	0	0	0	1.04496	0	0	0	0	0	0	0
mmu_circ_002313	chr10_26401567_26403571_R	circRNA	Yes	chr10	26401567	26403571	-	240	2004	2	0,1891	127,113	26401567,26403458	26401694,26403571	ENSMMUT00000026603	chr10:26394998-26401567|chr10:26403571-26412602	1	1	0	1	0	0	0	0	0	0	0	0	2	0	1	0	0	0	0	0	0	0	0	0	0	1.04496	0	1.37714	1.55173	0	0	0	0
mmu_circ_002314	chr10_26401567_26420319_R	circRNA	Yes	chr10	26401567	26420319	-	504	18752	4	0,1891,11035,18622	127,113,134,130	26401567,26403458,26412602,26420189	26401694,26403571,26412736,26420319	ENSMMUT00000026603	chr10:26394998-26401567|chr10:26420319-26426594	0	0	0	0	4	0	0	0	0	0	0	0	0	1	0	0	0	0	0	0	0	0	0	0	0	0	0	0	0	0	0	0	0
mmu_circ_002315	chr10_26446953_26449296_F	circRNA	Yes	chr10	26446953	26449296	+	2343	2343	1	0	2343	26446953	26449296	ENSMMUT00000026601	chr10:26427289-26446953|chr10:26449296-26454443	1	1	0	0	0	1	1	0	0	0	0	2	1	0	0	0	0	0	0	0	0	0	0	0	0	1.04496	0.990325	0.688568	1.55173	0	0	0	0
mmu_circ_002317	chr10_26600909_26621468_R	circRNA	Yes	chr10	26600909	26621468	-	390	20559	4	0,291,18188,20461	73,138,81,98	26600909,26601200,26619097,26621370	26600982,26601338,26619178,26621468	ENSMMUT00000024215	chr10:26589376-26600909|chr10:26621468-26657963	0	0	0	0	1	0	1	0	0	0	0	0	1	0	0	0	1	1	0	0	0	0	0	0	0	0	0.990325	0.688568	0	0	0	0	0.705287
mmu_circ_002318	chr10_26619097_26621468_R	circRNA	Yes	chr10	26619097	26621468	-	179	2371	2	0,2273	81,98	26619097,26621370	26619178,26621468	ENSMMUT00000044882	chr10:26601338-26619097|chr10:26621468-26657963	0	1	0	0	0	0	0	0	0	0	1	0	0	1	0	0	3	0	0	0	0	0	0	0	0	0	0	0	1.55173	0	0	0	0
mmu_circ_002320	chr10_26681205_26695433_R	circRNA	Yes	chr10	26681205	26695433	-	467	14228	5	0,1636,1932,11394,14134	149,59,73,92,94	26681205,26682841,26683137,26692599,26695339	26681354,26682900,26683210,26692691,26695433	ENSMMUT00000024215	chr10:26658145-26681205|chr10:26695433-26702974	0	0	0	0	0	0	0	0	0	0	0	0	0	1	0	0	1	0	0	0	0	0	0	0	0	0	0	0	0	0	0	0	0
mmu_circ_002321	chr10_27059382_27059514_R	ciRNA	Yes*	chr10	27059382	27059514	-	132	132	1	0	132	27059382	27059514	ENSMMUT00000028323	chr10:27059359-27059514	0	0	0	0	0	0	0	0	0	1	0	0	0	0	0	0	0	0	0	0	0	0	0	0	0	0	0	0	0	0	0	0	0
mmu_circ_002324	chr10_27240487_27259298_R	circRNA	Yes	chr10	27240487	27259298	-	609	18811	5	0,1826,11978,15302,18634	115,92,106,119,177	27240487,27242313,27252465,27255789,27259121	27240602,27242405,27252571,27255908,27259298	PREDICTED.6431.1	chr10:27237841-27240487|chr10:27259298-27261673	0	0	0	0	0	0	0	0	0	0	0	0	1	0	0	1	1	1	0	0	0	0	0	0	0	0	0	0.688568	0	0	0	0	0.705287
mmu_circ_002325	chr10_27255789_27259298_R	circRNA	Yes	chr10	27255789	27259298	-	296	3509	2	0,3332	119,177	27255789,27259121	27255908,27259298	ENSMMUT00000044862	chr10:27252571-27255789|chr10:27259298-27261673	0	0	1	0	0	1	1	0	1	0	0	0	1	0	0	0	0	0	0	0	0	0	0	0	0	0	0.990325	0.688568	0	0.993085	0	0	0
mmu_circ_002330	chr10_27543102_27544392_F	circRNA	Yes*	chr10	27543102	27544392	+	208	1290	2	0,1174	92,116	27543102,27544276	27543194,27544392	ENSMMUT00000044855	chr10:27538420-27543102|chr10:27544392-27549667	0	0	0	0	0	0	1	0	0	0	0	0	0	0	0	0	0	0	0	0	0	0	0	0	0	0	0.990325	0	0	0	0	0	0
mmu_circ_002331	chr10_27549667_27551337_F	circRNA	Yes	chr10	27549667	27551337	+	233	1670	2	0,1577	140,93	27549667,27551244	27549807,27551337	PREDICTED.10566.2	chr10:27544392-27549667|chr10:27551337-27557342	0	0	0	0	0	0	0	2	0	0	0	0	0	0	0	0	0	0	0	0	0	0	0	0	0	0	0	0	0	0	0	0	0
mmu_circ_002332	chr10_27651497_27652714_F	circRNA	Yes	chr10	27651497	27652714	+	273	1217	2	0,1049	105,168	27651497,27652546	27651602,27652714	ENSMMUT00000007841	chr10:27648725-27651497|chr10:27652714-27654328	0	0	0	0	0	0	0	0	0	0	0	0	0	0	0	1	1	0	0	0	0	0	0	0	0	0	0	0	0	0	0	0	0
mmu_circ_002333	chr10_27969892_28003641_R	circRNA	Yes	chr10	27969892	28003641	-	750	33749	4	0,1122,32725,33660	156,92,413,89	27969892,27971014,28002617,28003552	27970048,27971106,28003030,28003641	PREDICTED.8673.1	chr10:27969088-27969892|chr10:28003641-28003895	0	0	0	1	0	0	0	0	0	0	0	0	0	0	0	1	0	1	0	0	0	0	0	0	0	0	0	0	0	0	0	0	0.705287
mmu_circ_002334	chr10_28002617_28006507_R	circRNA	Yes	chr10	28002617	28006507	-	864	3890	3	0,935,3528	413,89,362	28002617,28003552,28006145	28003030,28003641,28006507	PREDICTED.6760.3	chr10:27971106-28002617|chr10:28006507-28039859	0	1	0	0	1	0	0	0	0	0	0	0	0	0	0	0	0	1	0	0	0	0	0	0	0	0	0	0	1.55173	0	0	0	0.705287
mmu_circ_002335	chr10_28507900_28510546_R	circRNA	Yes	chr10	28507900	28510546	-	299	2646	2	0,2468	121,178	28507900,28510368	28508021,28510546	ENSMMUT00000013007	chr10:28497440-28507900|chr10:28510546-28522525	0	0	0	0	0	0	0	0	0	0	0	0	0	0	1	0	0	0	0	0	2	0	0	0	0	0	0	0	0	0	0	0	0
mmu_circ_002338	chr10_28655501_28657878_R	circRNA	Yes	chr10	28655501	28657878	-	474	2377	3	0,696,2263	180,180,114	28655501,28656197,28657764	28655681,28656377,28657878	PREDICTED.10624.3	chr10:28615836-28655501|chr10:28657878-28663826	0	0	0	0	1	0	0	0	0	0	0	0	0	0	0	0	1	0	0	0	0	0	0	0	0	0	0	0	0	0	0	0	0
mmu_circ_002340	chr10_28655501_28669290_R	circRNA	Yes*	chr10	28655501	28669290	-	942	13789	5	0,696,2263,8325,13709	180,180,114,388,80	28655501,28656197,28657764,28663826,28669210	28655681,28656377,28657878,28664214,28669290	ENSMMUT00000044820	chr10:28628955-28655501|chr10:28669290-28680265	0	0	0	0	0	0	1	0	0	0	0	0	0	0	0	0	0	0	0	0	0	0	0	0	0	0	0.990325	0	0	0	0	0	0
mmu_circ_002341	chr10_28655501_28684505_R	circRNA	Yes	chr10	28655501	28684505	-	1199	29004	7	0,696,2263,8325,13709,24764,28832	180,180,114,388,80,85,172	28655501,28656197,28657764,28663826,28669210,28680265,28684333	28655681,28656377,28657878,28664214,28669290,28680350,28684505	ENSMMUT00000044820	chr10:28628955-28655501|chr10:28684505-28723260	0	0	0	0	0	0	0	0	0	0	1	0	0	1	0	0	1	0	0	0	0	0	0	0	0	0	0	0	0	0	0	0	0
mmu_circ_002342	chr10_28655501_28723375_R	circRNA	Yes	chr10	28655501	28723375	-	1314	67874	8	0,696,2263,8325,13709,24764,28832,67759	180,180,114,388,80,85,172,115	28655501,28656197,28657764,28663826,28669210,28680265,28684333,28723260	28655681,28656377,28657878,28664214,28669290,28680350,28684505,28723375	ENSMMUT00000044820	chr10:28628955-28655501|chr10:28723375-28760065	0	0	0	0	0	0	1	0	0	0	0	0	0	0	1	0	0	1	1	0	0	0	0	0	0.613597	0	0.990325	0	0	0	0	0	0.705287
mmu_circ_002344	chr10_28663826_28669290_R	circRNA	Yes	chr10	28663826	28669290	-	468	5464	2	0,5384	388,80	28663826,28669210	28664214,28669290	ENSMMUT00000044820	chr10:28657878-28663826|chr10:28669290-28680265	0	0	0	0	2	1	1	1	0	0	0	0	0	0	0	0	5	1	0	0	1	0	0	0	0	0	0.990325	0	0	0	0	0	0.705287
mmu_circ_002345	chr10_28663826_28669290_R	circRNA	Yes	chr10	28663826	28669290	-	403	5464	3	0,100,5384	35,288,80	28663826,28663926,28669210	28663861,28664214,28669290	PREDICTED.2858.4	chr10:28657878-28663826|chr10:28669290-28680265	0	0	2	0	0	0	0	0	0	0	0	0	0	0	0	0	0	0	0	0	0	0	0	0	0	0	0	0	0	1.98617	0	0	0
mmu_circ_002346	chr10_28663826_28680350_R	circRNA	Yes	chr10	28663826	28680350	-	553	16524	3	0,5384,16439	388,80,85	28663826,28669210,28680265	28664214,28669290,28680350	ENSMMUT00000044820	chr10:28657878-28663826|chr10:28680350-28684333	0	0	0	1	0	0	0	0	0	0	0	1	0	0	0	0	0	0	1	0	0	0	0	0	0.613597	0	0	0	0	0	0	0	0
mmu_circ_002347	chr10_28663826_28684505_R	circRNA	Yes	chr10	28663826	28684505	-	725	20679	4	0,5384,16439,20507	388,80,85,172	28663826,28669210,28680265,28684333	28664214,28669290,28680350,28684505	ENSMMUT00000044820	chr10:28657878-28663826|chr10:28684505-28723260	0	0	0	0	0	0	0	1	0	1	0	0	0	0	0	0	0	1	0	0	0	0	0	0	0	0	0	0	0	0	0	0	0.705287
mmu_circ_002348	chr10_28663826_28684505_R	circRNA	Yes	chr10	28663826	28684505	-	660	20679	5	0,100,5384,16439,20507	35,288,80,85,172	28663826,28663926,28669210,28680265,28684333	28663861,28664214,28669290,28680350,28684505	ENSMMUT00000014874	chr10:28657878-28663826|chr10:28684505-28723260	0	0	1	0	0	0	0	0	0	0	0	0	0	0	0	0	0	0	0	0	0	1	0	0	0	0	0	0	0	0.993085	0.430566	0	0
mmu_circ_002349	chr10_28663826_28723375_R	circRNA	Yes	chr10	28663826	28723375	-	840	59549	5	0,5384,16439,20507,59434	388,80,85,172,115	28663826,28669210,28680265,28684333,28723260	28664214,28669290,28680350,28684505,28723375	ENSMMUT00000044820	chr10:28657878-28663826|chr10:28723375-28760065	0	2	0	0	0	0	0	0	0	0	0	0	2	0	0	0	1	0	0	0	1	0	0	0	0	0	0	1.37714	3.10345	0	0	0	0
mmu_circ_002352	chr10_28669210_28723375_R	circRNA	Yes	chr10	28669210	28723375	-	452	54165	4	0,11055,15123,54050	80,85,172,115	28669210,28680265,28684333,28723260	28669290,28680350,28684505,28723375	ENSMMUT00000044820	chr10:28664214-28669210|chr10:28723375-28760065	0	0	0	0	0	0	0	0	0	0	0	0	0	0	0	2	0	0	0	0	0	1	0	0	0	0	0	0	0	0	0.430566	0	0
mmu_circ_002353	chr10_28680265_28684505_R	circRNA	Yes	chr10	28680265	28684505	-	257	4240	2	0,4068	85,172	28680265,28684333	28680350,28684505	ENSMMUT00000044820	chr10:28669290-28680265|chr10:28684505-28723260	0	0	0	0	0	0	1	0	0	0	0	0	1	0	0	0	0	0	0	0	0	0	0	0	0	0	0.990325	0.688568	0	0	0	0	0
mmu_circ_002354	chr10_28680265_28723375_R	circRNA	Yes	chr10	28680265	28723375	-	372	43110	3	0,4068,42995	85,172,115	28680265,28684333,28723260	28680350,28684505,28723375	ENSMMUT00000044820	chr10:28669290-28680265|chr10:28723375-28760065	0	0	0	1	0	1	0	2	0	0	0	0	0	0	2	0	0	0	1	0	0	0	0	0	0.613597	0	0	0	0	0	0	0	0
mmu_circ_002358	chr10_28811070_28813849_F	circRNA	Yes	chr10	28811070	28813849	+	249	2779	2	0,2725	195,54	28811070,28813795	28811265,28813849	PREDICTED.3629.3	chr10:28803036-28811070|chr10:28813849-28817319	0	2	0	0	0	0	0	0	0	0	0	0	0	0	0	0	10	0	0	0	0	0	0	0	0	0	0	0	3.10345	0	0	0	0
mmu_circ_002359	chr10_28811070_28813849_F	circRNA	Yes	chr10	28811070	28813849	+	315	2779	3	0,2563,2725	195,66,54	28811070,28813633,28813795	28811265,28813699,28813849	PREDICTED.5035.3	chr10:28803036-28811070|chr10:28813849-28817319	0	0	0	0	0	0	0	0	0	0	0	5	0	0	4	0	0	0	3	0	0	0	0	1	1.84079	0	0	0	0	0	0	0.401374	0
mmu_circ_002361	chr10_28873114_28878806_F	circRNA	Yes	chr10	28873114	28878806	+	1486	5692	3	0,3902,5270	85,979,422	28873114,28877016,28878384	28873199,28877995,28878806	PREDICTED.6110.1	chr10:28867336-28873114|chr10:28878806-28900229	0	0	0	0	0	0	0	0	0	0	0	0	0	0	0	2	0	0	0	0	0	0	0	0	0	0	0	0	0	0	0	0	0
mmu_circ_002362	chr10_29030627_29031752_R	circRNA	Yes*	chr10	29030627	29031752	-	162	1125	2	0,1023	60,102	29030627,29031650	29030687,29031752	PREDICTED.5063.1	chr10:29029039-29030627|chr10:29031752-29032508	0	0	0	0	0	0	0	0	0	0	0	1	0	0	0	0	0	0	0	0	0	0	0	0	0	0	0	0	0	0	0	0	0
mmu_circ_002363	chr10_29032508_29032961_R	circRNA	Yes	chr10	29032508	29032961	-	270	453	2	0,342	159,111	29032508,29032850	29032667,29032961	PREDICTED.10725.1	chr10:29031752-29032508|chr10:29032961-29036099	0	0	0	3	1	0	0	0	0	1	0	1	0	0	0	0	0	0	0	2	0	0	0	1	0	0	0	0	0	0	0	0.401374	0
mmu_circ_002364	chr10_29068315_29069413_R	circRNA	Yes	chr10	29068315	29069413	-	292	1098	2	0,953	147,145	29068315,29069268	29068462,29069413	PREDICTED.4977.3	chr10:29067048-29068315|chr10:29069413-29071055	0	0	0	1	0	0	0	0	0	0	0	0	0	0	2	0	0	0	0	0	0	0	0	0	0	0	0	0	0	0	0	0	0
mmu_circ_002366	chr10_29160254_29177038_F	circRNA	Yes	chr10	29160254	29177038	+	332	16784	4	0,1772,9157,16726	93,108,73,58	29160254,29162026,29169411,29176980	29160347,29162134,29169484,29177038	PREDICTED.8549.7	chr10:29149098-29160254|chr10:29177038-29196992	0	0	0	0	1	0	0	0	1	0	1	0	0	0	2	0	0	0	0	0	0	0	0	0	0	0	0	0	0	0	0	0	0
mmu_circ_002367	chr10_29169411_29197101_F	circRNA	Yes	chr10	29169411	29197101	+	240	27690	3	0,7569,27581	73,58,109	29169411,29176980,29196992	29169484,29177038,29197101	ENSMMUT00000014559	chr10:29162134-29169411|chr10:29197101-29231422	1	0	1	1	1	0	0	0	0	0	0	0	0	0	0	0	3	0	0	0	0	0	0	0	0	1.04496	0	0	0	0.993085	0	0	0
mmu_circ_002370	chr10_29505665_29519557_F	circRNA	Yes	chr10	29505665	29519557	+	395	13892	3	0,8402,13684	58,129,208	29505665,29514067,29519349	29505723,29514196,29519557	PREDICTED.6157.1	chr10:29493636-29505665|chr10:29519557-29528406	0	0	0	0	0	0	0	0	0	0	0	0	0	0	0	2	0	0	0	0	0	0	0	0	0	0	0	0	0	0	0	0	0
mmu_circ_002371	chr10_29514067_29528592_F	circRNA	Yes	chr10	29514067	29528592	+	523	14525	3	0,5282,14339	129,208,186	29514067,29519349,29528406	29514196,29519557,29528592	ENSMMUT00000000342	chr10:29508292-29514067|chr10:29528592-29538890	0	0	0	0	1	1	0	0	0	0	0	0	0	0	0	0	0	0	0	0	0	0	0	0	0	0	0	0	0	0	0	0	0
mmu_circ_002375	chr10_29645609_29645736_R	ciRNA	Yes	chr10	29645609	29645736	-	127	127	1	0	127	29645609	29645736	PREDICTED.4186.2	chr10:29645585-29645736	0	0	0	0	0	0	0	1	0	0	0	0	0	1	0	0	0	0	0	0	0	0	0	0	0	0	0	0	0	0	0	0	0
mmu_circ_002377	chr10_29789240_29797635_F	circRNA	Yes	chr10	29789240	29797635	+	279	8395	2	0,8272	156,123	29789240,29797512	29789396,29797635	PREDICTED.6339.1	chr10:29783931-29789240|chr10:29797635-29808026	2	0	0	0	0	0	0	0	0	0	0	1	0	0	0	0	0	0	0	0	0	0	0	0	0	2.08991	0	0	0	0	0	0	0
mmu_circ_002380	chr10_29830655_29840372_F	circRNA	Yes	chr10	29830655	29840372	+	255	9717	3	0,4077,9568	69,37,149	29830655,29834732,29840223	29830724,29834769,29840372	ENSMMUT00000014987	chr10:29827064-29830655|chr10:29840372-29853874	3	0	1	0	0	0	0	0	0	0	0	0	0	1	1	0	1	0	0	0	0	0	0	0	0	3.13487	0	0	0	0.993085	0	0	0
mmu_circ_002381	chr10_29982718_29993218_F	circRNA	Yes	chr10	29982718	29993218	+	412	10500	3	0,3925,10357	144,125,143	29982718,29986643,29993075	29982862,29986768,29993218	ENSMMUT00000024857	chr10:29979864-29982718|chr10:29993218-30007106	0	0	0	0	0	0	2	0	0	0	0	0	0	1	0	0	0	0	0	0	0	0	0	0	0	0	1.98065	0	0	0	0	0	0
mmu_circ_002383	chr10_30083246_30091075_R	circRNA	Yes	chr10	30083246	30091075	-	669	7829	6	0,472,1404,3301,6376,7756	141,134,160,89,72,73	30083246,30083718,30084650,30086547,30089622,30091002	30083387,30083852,30084810,30086636,30089694,30091075	PREDICTED.3914.1	chr10:30074993-30083246|chr10:30091075-30098639	0	0	0	0	0	0	0	0	0	0	0	0	0	0	0	0	1	0	0	0	0	0	0	1	0	0	0	0	0	0	0	0.401374	0
mmu_circ_002385	chr10_30084650_30086636_R	circRNA	Yes	chr10	30084650	30086636	-	249	1986	2	0,1897	160,89	30084650,30086547	30084810,30086636	PREDICTED.3914.1	chr10:30083852-30084650|chr10:30086636-30089622	0	0	0	0	1	0	0	0	0	0	0	0	1	0	0	0	1	1	0	0	1	0	0	0	0	0	0	0.688568	0	0	0	0	0.705287
mmu_circ_002388	chr10_30098639_30146778_R	circRNA	Yes	chr10	30098639	30146778	-	1088	48139	9	0,5718,13941,17991,21544,23692,26318,39816,48001	129,86,70,175,96,190,158,46,138	30098639,30104357,30112580,30116630,30120183,30122331,30124957,30138455,30146640	30098768,30104443,30112650,30116805,30120279,30122521,30125115,30138501,30146778	PREDICTED.3914.1	chr10:30091075-30098639|chr10:30146778-30147866	0	0	0	0	0	0	0	0	1	0	0	0	0	0	1	0	0	1	0	0	0	0	0	0	0	0	0	0	0	0	0	0	0.705287
mmu_circ_002389	chr10_30120183_30146778_R	circRNA	Yes	chr10	30120183	30146778	-	628	26595	5	0,2148,4774,18272,26457	96,190,158,46,138	30120183,30122331,30124957,30138455,30146640	30120279,30122521,30125115,30138501,30146778	PREDICTED.3914.1	chr10:30116805-30120183|chr10:30146778-30147866	0	0	0	1	0	1	0	0	0	0	0	0	0	0	1	0	0	0	0	0	0	0	0	0	0	0	0	0	0	0	0	0	0
mmu_circ_002390	chr10_30146640_30147991_R	circRNA	Yes	chr10	30146640	30147991	-	263	1351	2	0,1226	138,125	30146640,30147866	30146778,30147991	PREDICTED.4187.6	chr10:30138501-30146640|chr10:30147991-30152607	7	3	1	4	4	1	6	3	2	0	0	0	3	3	9	5	6	6	5	0	2	0	0	0	3.06799	7.31469	5.94195	2.0657	4.65518	0.993085	0	0	4.23172
mmu_circ_002391	chr10_30146640_30152749_R	circRNA	Yes	chr10	30146640	30152749	-	405	6109	3	0,1226,5967	138,125,142	30146640,30147866,30152607	30146778,30147991,30152749	PREDICTED.3914.1	chr10:30138501-30146640|chr10:30152749-30166989	0	0	0	0	0	0	0	0	0	0	0	0	1	0	0	1	0	0	0	0	1	0	0	0	0	0	0	0.688568	0	0	0	0	0
mmu_circ_002393	chr10_30152607_30167080_R	circRNA	Yes	chr10	30152607	30167080	-	233	14473	2	0,14382	142,91	30152607,30166989	30152749,30167080	PREDICTED.4187.6	chr10:30147991-30152607|chr10:30167080-30190602	1	0	1	1	0	0	0	0	0	0	0	0	0	1	0	0	2	1	0	0	0	0	0	0	0	1.04496	0	0	0	0.993085	0	0	0.705287
mmu_circ_002395	chr10_30485087_30490333_F	circRNA	Yes*	chr10	30485087	30490333	+	231	5246	2	0,5119	104,127	30485087,30490206	30485191,30490333	PREDICTED.6816.1	chr10:30483287-30485087|chr10:30490333-30491584	0	0	0	0	0	0	1	0	0	0	0	0	0	0	0	0	0	0	0	0	0	0	0	0	0	0	0.990325	0	0	0	0	0	0
mmu_circ_002397	chr10_30490197_30492420_F	circRNA	Yes*	chr10	30490197	30492420	+	386	2223	3	0,1387,2074	136,101,149	30490197,30491584,30492271	30490333,30491685,30492420	PREDICTED.5089.3	chr10:30485214-30490197|chr10:30492420-30495618	0	0	0	0	0	0	0	0	0	0	0	1	0	0	0	0	0	0	0	0	0	0	0	0	0	0	0	0	0	0	0	0	0
mmu_circ_002400	chr10_30965999_30985152_R	circRNA	Yes*	chr10	30965999	30985152	-	877	19153	6	0,8374,9861,13564,15274,19063	69,196,86,254,182,90	30965999,30974373,30975860,30979563,30981273,30985062	30966068,30974569,30975946,30979817,30981455,30985152	PREDICTED.4321.1	chr10:30961355-30965999|chr10:30985152-30994888	0	0	0	0	0	0	0	0	1	0	0	0	0	0	0	0	0	0	0	0	0	0	0	0	0	0	0	0	0	0	0	0	0
mmu_circ_002401	chr10_30974373_30975946_R	circRNA	Yes*	chr10	30974373	30975946	-	282	1573	2	0,1487	196,86	30974373,30975860	30974569,30975946	PREDICTED.4321.1	chr10:30966068-30974373|chr10:30975946-30979563	1	0	0	0	0	0	0	0	0	0	0	0	0	0	0	0	0	0	0	0	0	0	0	0	0	1.04496	0	0	0	0	0	0	0
mmu_circ_002403	chr10_30979563_30981455_R	circRNA	Yes	chr10	30979563	30981455	-	436	1892	2	0,1710	254,182	30979563,30981273	30979817,30981455	ENSMMUT00000033114	chr10:30975946-30979563|chr10:30981455-30985062	0	1	0	1	0	0	0	0	1	0	1	0	0	0	0	0	0	1	0	0	0	0	0	0	0	0	0	0	1.55173	0	0	0	0.705287
mmu_circ_002404	chr10_30981273_30985152_R	circRNA	Yes*	chr10	30981273	30985152	-	272	3879	2	0,3789	182,90	30981273,30985062	30981455,30985152	ENSMMUT00000033114	chr10:30979817-30981273|chr10:30985152-30994888	0	0	0	0	0	0	0	0	0	0	0	0	0	0	0	1	0	0	0	0	0	0	0	0	0	0	0	0	0	0	0	0	0
mmu_circ_002405	chr10_30994888_30995130_R	circRNA	Yes	chr10	30994888	30995130	-	242	242	1	0	242	30994888	30995130	ENSMMUT00000033114	chr10:30985152-30994888|chr10:30995130-30999450	1	0	0	0	0	0	0	0	0	0	0	0	0	0	0	0	0	1	0	0	1	0	0	0	0	1.04496	0	0	0	0	0	0	0.705287
mmu_circ_002413	chr10_32204064_32206786_R	circRNA	Yes	chr10	32204064	32206786	-	201	2722	2	0,2630	109,92	32204064,32206694	32204173,32206786	PREDICTED.6603.1	chr10:32150164-32204064|chr10:32206786-32214233	0	0	1	4	0	2	0	4	0	0	0	0	0	0	0	0	11	8	0	1	3	3	0	1	0	0	0	0	0	0.993085	1.2917	0.401374	5.6423
mmu_circ_002414	chr10_32260970_32261628_R	circRNA	Yes	chr10	32260970	32261628	-	344	658	3	0,224,556	119,123,102	32260970,32261194,32261526	32261089,32261317,32261628	ENSMMUT00000018090	chr10:32250306-32260970|chr10:32261628-32266275	0	0	0	0	0	0	0	1	0	0	0	0	0	0	0	0	0	0	1	0	0	0	0	0	0.613597	0	0	0	0	0	0	0	0
mmu_circ_002415	chr10_32425714_32427476_R	circRNA	Yes*	chr10	32425714	32427476	-	302	1762	3	0,1430,1643	71,112,119	32425714,32427144,32427357	32425785,32427256,32427476	PREDICTED.3268.3	chr10:32423064-32425714|chr10:32427476-32429854	0	0	0	0	0	0	0	1	0	0	0	0	0	0	0	0	0	0	0	0	0	0	0	0	0	0	0	0	0	0	0	0	0
mmu_circ_002420	chr10_33088238_33088440_R	circRNA	Yes*	chr10	33088238	33088440	-	202	202	1	0	202	33088238	33088440	PREDICTED.5555.2	chr10:33086584-33088238|chr10:33088440-33093610	0	0	0	0	0	0	0	0	0	1	0	0	0	0	0	0	0	0	0	0	0	0	0	0	0	0	0	0	0	0	0	0	0
mmu_circ_002423	chr10_33739630_33740830_R	circRNA	Yes	chr10	33739630	33740830	-	236	1200	2	0,1051	87,149	33739630,33740681	33739717,33740830	PREDICTED.10977.2	chr10:33736925-33739630|chr10:33740830-33741987	0	0	0	0	0	0	0	0	0	0	0	0	0	0	0	0	1	1	0	0	0	0	0	0	0	0	0	0	0	0	0	0	0.705287
mmu_circ_002425	chr10_33745351_33751142_R	circRNA	Yes	chr10	33745351	33751142	-	255	5791	3	0,3806,5731	111,84,60	33745351,33749157,33751082	33745462,33749241,33751142	PREDICTED.10977.2	chr10:33743183-33745351|chr10:33751142-33752923	0	0	0	0	2	0	1	0	0	0	0	0	0	0	1	0	0	0	0	0	0	0	0	0	0	0	0.990325	0	0	0	0	0	0
mmu_circ_002428	chr10_33751082_33758838_R	circRNA	Yes	chr10	33751082	33758838	-	274	7756	3	0,2418,7644	60,102,112	33751082,33753500,33758726	33751142,33753602,33758838	PREDICTED.5174.1	chr10:33749241-33751082|chr10:33758838-33761413	0	0	0	0	0	0	0	0	0	0	0	2	0	0	0	0	0	0	0	0	0	0	0	0	0	0	0	0	0	0	0	0	0
mmu_circ_002429	chr10_33751082_33758838_R	circRNA	Yes	chr10	33751082	33758838	-	325	7756	4	0,1841,2418,7644	60,51,102,112	33751082,33752923,33753500,33758726	33751142,33752974,33753602,33758838	PREDICTED.10977.2	chr10:33749241-33751082|chr10:33758838-33761413	3	0	0	0	1	0	0	0	0	0	0	0	0	0	2	0	0	3	1	0	2	0	0	0	0.613597	3.13487	0	0	0	0	0	0	2.11586
mmu_circ_002430	chr10_33758726_33761623_R	circRNA	Yes	chr10	33758726	33761623	-	322	2897	2	0,2687	112,210	33758726,33761413	33758838,33761623	PREDICTED.4062.1	chr10:33753602-33758726|chr10:33761623-33798681	0	1	0	0	0	0	0	0	0	0	0	0	0	0	2	0	0	0	0	0	0	0	0	0	0	0	0	0	1.55173	0	0	0	0
mmu_circ_002432	chr10_34404710_34413573_F	circRNA	Yes*	chr10	34404710	34413573	+	422	8863	3	0,1936,8677	153,83,186	34404710,34406646,34413387	34404863,34406729,34413573	PREDICTED.4058.1	chr10:34398184-34404710|chr10:34413573-34435713	0	0	0	0	0	0	0	0	0	0	0	0	0	0	0	1	0	0	0	0	0	0	0	0	0	0	0	0	0	0	0	0	0
mmu_circ_002434	chr10_34715972_34718582_R	circRNA	Yes	chr10	34715972	34718582	-	507	2610	4	0,538,1728,2444	138,110,93,166	34715972,34716510,34717700,34718416	34716110,34716620,34717793,34718582	PREDICTED.10998.1	chr10:34709318-34715972|chr10:34718582-34721599	1	0	0	0	0	0	0	0	0	0	0	0	2	0	0	0	0	1	0	0	0	0	0	0	0	1.04496	0	1.37714	0	0	0	0	0.705287
mmu_circ_002436	chr10_36274728_36275661_F	circRNA	Yes	chr10	36274728	36275661	+	421	933	2	0,591	79,342	36274728,36275319	36274807,36275661	ENSMMUT00000008240	chr10:36259767-36274728|chr10:36275661-36297589	2	1	0	2	1	1	5	5	2	0	0	0	2	0	7	0	4	0	0	0	0	0	0	0	0	2.08991	4.95162	1.37714	1.55173	0	0	0	0
mmu_circ_002438	chr10_36297589_36299298_F	circRNA	Yes	chr10	36297589	36299298	+	296	1709	3	0,1261,1572	85,74,137	36297589,36298850,36299161	36297674,36298924,36299298	ENSMMUT00000008238	chr10:36285651-36297589|chr10:36299298-36316339	0	0	0	0	0	0	0	0	1	0	0	0	0	0	0	2	0	0	1	0	0	0	0	0	0.613597	0	0	0	0	0	0	0	0
mmu_circ_002440	chr10_36297589_36316430_F	circRNA	Yes	chr10	36297589	36316430	+	414	18841	5	0,626,1268,1572,18750	85,34,67,137,91	36297589,36298215,36298857,36299161,36316339	36297674,36298249,36298924,36299298,36316430	PREDICTED.6731.2	chr10:36275661-36297589|chr10:36316430-36319276	0	0	0	0	0	0	0	0	0	1	0	0	0	0	0	0	1	0	0	0	0	0	0	0	0	0	0	0	0	0	0	0	0
mmu_circ_002442	chr10_36316339_36326156_F	circRNA	Yes	chr10	36316339	36326156	+	205	9817	3	0,2937,9780	91,77,37	36316339,36319276,36326119	36316430,36319353,36326156	ENSMMUT00000008240	chr10:36299298-36316339|chr10:36326156-36328200	0	0	0	0	0	0	0	0	0	0	0	0	0	0	2	0	0	0	0	0	0	0	0	0	0	0	0	0	0	0	0	0	0
mmu_circ_002444	chr10_36614302_36615617_R	circRNA	Yes	chr10	36614302	36615617	-	236	1315	2	0,1168	89,147	36614302,36615470	36614391,36615617	ENSMMUT00000024562	chr10:36612393-36614302|chr10:36615617-36622537	0	6	2	11	5	3	4	4	3	1	1	3	11	22	15	9	14	5	0	6	1	0	4	0	0	0	3.9613	7.57424	9.31035	1.98617	0	0	3.52644
mmu_circ_002448	chr10_36855491_36869342_F	circRNA	Yes*	chr10	36855491	36869342	+	702	13851	5	0,4918,9957,11499,13682	84,114,129,206,169	36855491,36860409,36865448,36866990,36869173	36855575,36860523,36865577,36867196,36869342	PREDICTED.3170.2	chr10:36800394-36855491|chr10:36869342-36878969	0	0	0	0	0	0	0	0	0	0	0	0	1	0	0	0	0	0	0	0	0	0	0	0	0	0	0	0.688568	0	0	0	0	0
mmu_circ_002449	chr10_36860409_36867196_F	circRNA	Yes	chr10	36860409	36867196	+	449	6787	3	0,5039,6581	114,129,206	36860409,36865448,36866990	36860523,36865577,36867196	PREDICTED.3865.2	chr10:36855575-36860409|chr10:36867196-36869173	0	1	0	0	0	0	0	1	0	0	0	0	0	0	0	0	0	0	0	0	0	0	0	0	0	0	0	0	1.55173	0	0	0	0
mmu_circ_002451	chr10_36865448_36867196_F	circRNA	Yes*	chr10	36865448	36867196	+	335	1748	2	0,1542	129,206	36865448,36866990	36865577,36867196	PREDICTED.6740.1	chr10:36860523-36865448|chr10:36867196-36869173	0	0	0	0	0	0	0	0	0	0	0	0	0	0	0	0	1	0	0	0	0	0	0	0	0	0	0	0	0	0	0	0	0
mmu_circ_002456	chr10_36881868_36885306_F	circRNA	Yes	chr10	36881868	36885306	+	424	3438	3	0,930,3353	184,155,85	36881868,36882798,36885221	36882052,36882953,36885306	PREDICTED.9079.1	chr10:36880488-36881868|chr10:36885306-36892478	0	0	0	0	0	0	0	0	0	0	0	1	0	0	1	0	0	0	0	0	0	0	0	0	0	0	0	0	0	0	0	0	0
mmu_circ_002459	chr10_37018932_37019161_R	ciRNA	Yes*	chr10	37018932	37019161	-	229	229	1	0	229	37018932	37019161	PREDICTED.5242.3	chr10:37018910-37019161	0	0	0	0	0	0	0	0	0	0	0	1	0	0	0	0	0	0	0	0	0	0	0	0	0	0	0	0	0	0	0	0	0
mmu_circ_002460	chr10_37244017_37246404_F	circRNA	Yes	chr10	37244017	37246404	+	464	2387	2	0,2133	210,254	37244017,37246150	37244227,37246404	PREDICTED.9096.5	chr10:37238396-37244017|chr10:37246404-37248047	0	0	0	0	4	0	0	1	0	0	0	0	2	0	0	1	4	0	0	0	0	0	0	0	0	0	0	1.37714	0	0	0	0	0
mmu_circ_002461	chr10_37244017_37246404_F	circRNA	Yes	chr10	37244017	37246404	+	607	2387	2	0,2133	353,254	37244017,37246150	37244370,37246404	ENSMMUT00000028049	chr10:37225261-37244017|chr10:37246404-37248047	4	0	0	2	0	0	7	0	1	0	0	0	0	1	2	0	0	1	2	0	0	0	0	0	1.22719	4.17982	6.93227	0	0	0	0	0	0.705287
mmu_circ_002462	chr10_37244017_37248224_F	circRNA	Yes	chr10	37244017	37248224	+	641	4207	3	0,2133,4030	210,254,177	37244017,37246150,37248047	37244227,37246404,37248224	PREDICTED.3881.5	chr10:37226282-37244017|chr10:37248224-37252472	0	0	0	0	4	0	0	0	0	0	0	0	0	0	0	0	0	0	0	0	0	0	0	0	0	0	0	0	0	0	0	0	0
mmu_circ_002463	chr10_37244017_37248224_F	circRNA	Yes	chr10	37244017	37248224	+	784	4207	3	0,2133,4030	353,254,177	37244017,37246150,37248047	37244370,37246404,37248224	ENSMMUT00000028049	chr10:37225261-37244017|chr10:37248224-37252472	6	0	0	0	0	0	7	0	0	0	1	1	1	1	4	3	0	2	1	0	0	1	0	0	0.613597	6.26973	6.93227	0.688568	0	0	0.430566	0	1.41057
mmu_circ_002467	chr10_37244017_37254364_F	circRNA	Yes	chr10	37244017	37254364	+	1034	10347	5	0,2133,4030,8455,10221	353,254,177,124,126	37244017,37246150,37248047,37252472,37254238	37244370,37246404,37248224,37252596,37254364	ENSMMUT00000028049	chr10:37225261-37244017|chr10:37254364-37259328	0	0	0	1	0	0	2	0	0	0	0	0	0	0	0	0	0	0	0	0	0	0	0	0	0	0	1.98065	0	0	0	0	0	0
mmu_circ_002468	chr10_37244017_37259486_F	circRNA	Yes	chr10	37244017	37259486	+	1192	15469	6	0,2133,4030,8455,10221,15311	353,254,177,124,126,158	37244017,37246150,37248047,37252472,37254238,37259328	37244370,37246404,37248224,37252596,37254364,37259486	PREDICTED.11101.4	chr10:37226282-37244017|chr10:37259486-37269887	0	0	0	0	2	0	0	0	0	0	0	0	0	0	0	0	0	0	0	0	0	0	0	0	0	0	0	0	0	0	0	0	0
mmu_circ_002469	chr10_37246150_37246404_F	circRNA	Yes	chr10	37246150	37246404	+	254	254	1	0	254	37246150	37246404	ENSMMUT00000028049	chr10:37244370-37246150|chr10:37246404-37248047	3	0	0	0	1	0	0	0	0	0	0	0	2	0	0	0	1	0	0	0	0	0	0	0	0	3.13487	0	1.37714	0	0	0	0	0
mmu_circ_002471	chr10_38518729_38521004_F	circRNA	Yes*	chr10	38518729	38521004	+	238	2275	2	0,2135	98,140	38518729,38520864	38518827,38521004	PREDICTED.7104.1	chr10:38517108-38518729|chr10:38521004-38524427	1	0	0	0	0	0	0	0	0	0	0	0	0	0	0	0	0	0	0	0	0	0	0	0	0	1.04496	0	0	0	0	0	0	0
mmu_circ_002473	chr10_38524427_38527115_F	circRNA	Yes*	chr10	38524427	38527115	+	230	2688	3	0,678,2600	59,83,88	38524427,38525105,38527027	38524486,38525188,38527115	PREDICTED.6773.1	chr10:38521004-38524427|chr10:38527115-38527924	0	0	0	0	0	0	0	0	0	0	0	0	0	0	0	0	0	0	0	1	0	0	0	0	0	0	0	0	0	0	0	0	0
mmu_circ_002479	chr10_39269889_39280212_F	circRNA	Yes	chr10	39269889	39280212	+	662	10323	5	0,394,4916,5987,10181	152,196,31,141,142	39269889,39270283,39274805,39275876,39280070	39270041,39270479,39274836,39276017,39280212	ENSMMUT00000019298	chr10:39265803-39269889|chr10:39280212-39285698	0	0	0	1	0	0	0	0	0	0	0	0	1	0	0	0	0	0	0	0	0	0	0	0	0	0	0	0.688568	0	0	0	0	0
mmu_circ_002480	chr10_39312128_39335979_F	circRNA	Yes	chr10	39312128	39335979	+	420	23851	5	0,15394,22978,23076,23782	187,76,2,86,69	39312128,39327522,39335106,39335204,39335910	39312315,39327598,39335108,39335290,39335979	ENSMMUT00000019299	chr10:39308922-39312128|chr10:39335979-39338307	0	0	0	1	1	0	0	0	0	0	0	1	2	0	5	0	1	0	0	0	0	0	0	0	0	0	0	1.37714	0	0	0	0	0
mmu_circ_002481	chr10_39312128_39338399_F	circRNA	Yes	chr10	39312128	39338399	+	512	26271	6	0,15394,22978,23076,23782,26179	187,76,2,86,69,92	39312128,39327522,39335106,39335204,39335910,39338307	39312315,39327598,39335108,39335290,39335979,39338399	ENSMMUT00000019299	chr10:39308922-39312128|chr10:39338399-39341135	0	1	0	0	0	0	0	0	0	0	0	0	0	0	1	0	0	0	0	0	0	0	0	0	0	0	0	0	1.55173	0	0	0	0
mmu_circ_002482	chr10_399077_399242_F	ciRNA	Yes	chr10	399077	399242	+	165	165	1	0	165	399077	399242	ENSMMUT00000021814	chr10:399077-399264	0	0	0	0	0	0	0	0	1	0	0	0	3	0	0	0	0	0	0	0	0	1	3	0	0	0	0	2.0657	0	0	0.430566	0	0
mmu_circ_002483	chr10_399077_399244_F	ciRNA	Yes	chr10	399077	399244	+	167	167	1	0	167	399077	399244	ENSMMUT00000021815	chr10:399077-399264	3	0	0	0	0	1	1	4	3	0	2	0	2	0	0	0	4	0	0	0	0	0	8	0	0	3.13487	0.990325	1.37714	0	0	0	0	0
mmu_circ_002485	chr10_41307095_41321598_R	circRNA	Yes	chr10	41307095	41321598	-	337	14503	4	0,3688,5454,14387	46,129,46,116	41307095,41310783,41312549,41321482	41307141,41310912,41312595,41321598	PREDICTED.4375.1	chr10:41298549-41307095|chr10:41321598-41323860	0	0	0	0	0	0	0	0	0	0	0	0	0	2	0	0	0	0	0	0	0	0	0	0	0	0	0	0	0	0	0	0	0
mmu_circ_002486	chr10_42041238_42042530_F	circRNA	Yes	chr10	42041238	42042530	+	263	1292	2	0,1114	85,178	42041238,42042352	42041323,42042530	ENSMMUT00000044488	chr10:42033633-42041238|chr10:42042530-42047119	0	0	0	0	2	0	2	1	1	0	0	1	0	1	2	0	0	0	0	0	0	0	0	0	0	0	1.98065	0	0	0	0	0	0
mmu_circ_002495	chr10_46851521_46868837_R	circRNA	Yes*	chr10	46851521	46868837	-	286	17316	3	0,10364,17195	80,85,121	46851521,46861885,46868716	46851601,46861970,46868837	ENSMMUT00000044468	chr10:46841242-46851521|chr10:46868837-46909927	0	0	0	0	0	0	0	1	0	0	0	0	0	0	0	0	0	0	0	0	0	0	0	0	0	0	0	0	0	0	0	0	0
mmu_circ_002497	chr10_47048001_47056014_R	circRNA	Yes	chr10	47048001	47056014	-	631	8013	5	0,3057,4457,5611,7899	148,115,153,101,114	47048001,47051058,47052458,47053612,47055900	47048149,47051173,47052611,47053713,47056014	ENSMMUT00000017317	chr10:47042094-47048001|chr10:47056014-47056610	0	0	0	1	0	1	0	0	0	0	0	0	0	0	2	0	0	0	0	0	0	0	0	0	0	0	0	0	0	0	0	0	0
mmu_circ_002498	chr10_47048001_47056999_R	circRNA	Yes	chr10	47048001	47056999	-	1020	8998	6	0,3057,4457,5611,7899,8609	148,115,153,101,114,389	47048001,47051058,47052458,47053612,47055900,47056610	47048149,47051173,47052611,47053713,47056014,47056999	ENSMMUT00000017317	chr10:47042094-47048001|chr10:47056999-47063005	0	0	0	0	0	0	0	0	0	0	0	0	0	0	2	0	0	0	0	0	0	0	0	0	0	0	0	0	0	0	0	0	0
mmu_circ_002499	chr10_47048001_47056999_R	circRNA	Yes	chr10	47048001	47056999	-	1035	8998	6	0,3057,4457,5611,7899,8609	148,115,168,101,114,389	47048001,47051058,47052458,47053612,47055900,47056610	47048149,47051173,47052626,47053713,47056014,47056999	PREDICTED.4062.2	chr10:47042094-47048001|chr10:47056999-47063005	0	0	0	0	0	0	0	0	0	0	0	0	0	0	0	0	0	0	0	2	0	0	0	0	0	0	0	0	0	0	0	0	0
mmu_circ_002500	chr10_47073562_47082352_F	circRNA	Yes	chr10	47073562	47082352	+	390	8790	4	0,1640,5574,8592	48,104,40,198	47073562,47075202,47079136,47082154	47073610,47075306,47079176,47082352	ENSMMUT00000017319	chr10:47069357-47073562|chr10:47082352-47092680	0	0	0	0	0	0	1	0	0	0	0	0	0	0	0	1	0	0	0	0	0	0	0	0	0	0	0.990325	0	0	0	0	0	0
mmu_circ_002503	chr10_49724858_49726843_R	circRNA	Yes	chr10	49724858	49726843	-	172	1985	2	0,1902	89,83	49724858,49726760	49724947,49726843	ENSMMUT00000013492	chr10:49701444-49724858|chr10:49726843-49753025	0	0	0	0	0	0	0	0	0	0	0	0	0	0	1	0	0	1	0	0	0	0	1	0	0	0	0	0	0	0	0	0	0.705287
mmu_circ_002504	chr10_49724858_49755935_R	circRNA	Yes	chr10	49724858	49755935	-	482	31077	5	0,1902,28167,30055,30957	89,83,138,52,120	49724858,49726760,49753025,49754913,49755815	49724947,49726843,49753163,49754965,49755935	ENSMMUT00000013497	chr10:49701444-49724858|chr10:49755935-49825516	0	0	0	0	0	0	0	1	0	0	0	0	0	0	0	0	1	0	0	0	0	0	0	0	0	0	0	0	0	0	0	0	0
mmu_circ_002507	chr10_49857189_49859518_R	circRNA	Yes	chr10	49857189	49859518	-	184	2329	2	0,2259	114,70	49857189,49859448	49857303,49859518	ENSMMUT00000013503	chr10:49846765-49857189|chr10:49859518-49904821	1	0	0	0	0	0	0	0	0	0	0	0	0	0	0	0	1	0	0	0	0	0	0	0	0	1.04496	0	0	0	0	0	0	0
mmu_circ_002508	chr10_51275698_51277182_R	circRNA	Yes	chr10	51275698	51277182	-	233	1484	2	0,1373	122,111	51275698,51277071	51275820,51277182	ENSMMUT00000044432	chr10:51274190-51275698|chr10:51277182-51278665	0	0	0	0	0	0	2	0	0	0	0	0	0	0	0	0	0	0	1	0	0	0	1	0	0.613597	0	1.98065	0	0	0	0	0	0
mmu_circ_002509	chr10_51277071_51278770_R	circRNA	Yes*	chr10	51277071	51278770	-	216	1699	2	0,1594	111,105	51277071,51278665	51277182,51278770	ENSMMUT00000044432	chr10:51275820-51277071|chr10:51278770-51290007	0	0	0	0	0	0	0	0	0	0	0	0	0	0	0	0	0	1	0	0	0	0	0	0	0	0	0	0	0	0	0	0	0.705287
mmu_circ_002510	chr10_51472682_51473398_F	circRNA	Yes	chr10	51472682	51473398	+	716	716	1	0	716	51472682	51473398	PREDICTED.7231.2	chr10:51468557-51472682|chr10:51473398-51475677	0	0	0	0	0	0	1	0	0	0	0	1	0	0	0	0	0	0	0	0	0	0	0	0	0	0	0.990325	0	0	0	0	0	0
mmu_circ_002511	chr10_51472682_51475796_F	circRNA	Yes	chr10	51472682	51475796	+	835	3114	2	0,2995	716,119	51472682,51475677	51473398,51475796	PREDICTED.4098.1	chr10:51468557-51472682|chr10:51475796-51482002	0	0	0	0	0	0	0	0	0	0	0	0	0	0	2	0	0	0	0	0	0	0	0	0	0	0	0	0	0	0	0	0	0
mmu_circ_002512	chr10_51472682_51482124_F	circRNA	Yes	chr10	51472682	51482124	+	957	9442	3	0,2995,9320	716,119,122	51472682,51475677,51482002	51473398,51475796,51482124	PREDICTED.7231.2	chr10:51468557-51472682|chr10:51482124-51491019	0	0	0	0	0	0	4	5	2	0	1	2	2	0	7	0	1	6	0	1	3	2	2	2	0	0	3.9613	1.37714	0	0	0.861132	0.802748	4.23172
mmu_circ_002515	chr10_51871889_51878262_F	circRNA	Yes	chr10	51871889	51878262	+	394	6373	3	0,3522,6211	154,78,162	51871889,51875411,51878100	51872043,51875489,51878262	ENSMMUT00000044414	chr10:51871282-51871889|chr10:51878262-51884979	0	0	0	0	0	0	0	0	0	0	0	0	0	0	0	0	1	0	0	1	0	0	0	0	0	0	0	0	0	0	0	0	0
[truncated: 8,295 more rows]
[truncated: 37 more columns]
