# Supplementary material for: Circular RNAs in monkey muscle: age-dependent changes
Source: Aging (Albany NY). 2015 Nov 4;7(11):903–10. doi: 10.18632/aging.100834 (PMC4694061; doi:10.18632/aging.100834)
Supplement: Supplemental Table S2 — List of additional ciRNAs included because they showed two or more instances of junction-spanning reads from the deeper sequencing analysis (100 million reads per sample). [file aging-07-0903-s002.xlsx]

## Sheet: Additional circRNAs
circRNA_ID	NAME	circ_type	Minimum 2 reads	circ_chromosome	circ_start	circ_end	circ_strand	circ_length	circ_genomic_length	circ_exon_count	circ_exon_starts	circ_exon_sizes	transcript_name	circ_flanking_intron	age0.005 inDepthSeq read number	age40.1 inDepthSeq read number	Linear_Chromosome	Linear_Strand	Linear_Start	Linear_End	Linear_Transcript_ID	Linear_Num_Exons	Linear_Exon_Start	Linear_Exon_End	Linear_Transcript_Class	rheMac2 Ensembl Gene ID	rheMac2 Transcript Start (bp)	rheMac2 Transcript End (bp)	rheMac2 Gene Start (bp)	rheMac2 Gene End (bp)	rheMac2 Strand	rheMac2 Transcript Name	rheMac2 Gene Name	rheMac2 Gene Biotype	rheMac2 Transcript Biotype	rheMac2 Ensembl Protein ID	rheMac2 RefSeq mRNA ID	rheMac2 RefSeq Protein ID	rheMac2 Description
mmu_circ_020177	chr1_100597985_100621227_R	circRNA	Yes	chr1	100597985	100621227	-	396	23242	2	0,23031	185,211	PREDICTED.23658.1	chr1:100567784-100597985|chr1:100621227-100639127	2	0	chr1	-	100123710	100985042	PREDICTED.23658.1	24	100123710,100127129,100149546,100248046,100288621,100361120,100362038,100426822,100435597,100500511,100567568,100597985,100621016,100639127,100641013,100724538,100736992,100744231,100764982,100785673,100882900,100939251,100984430,100984878,	100124141,100127270,100149690,100248226,100288764,100361240,100362159,100426906,100435666,100500676,100567784,100598170,100621227,100639297,100641121,100724626,100737074,100744428,100765144,100785761,100882983,100939362,100984584,100985042,	potentially_novel_isoform
mmu_circ_020178	chr1_100621016_100641121_R	circRNA	Yes	chr1	100621016	100641121	-	489	20105	3	0,18111,19997	211,170,108	PREDICTED.23658.1	chr1:100598170-100621016|chr1:100641121-100724538	2	0	chr1	-	100123710	100985042	PREDICTED.23658.1	24	100123710,100127129,100149546,100248046,100288621,100361120,100362038,100426822,100435597,100500511,100567568,100597985,100621016,100639127,100641013,100724538,100736992,100744231,100764982,100785673,100882900,100939251,100984430,100984878,	100124141,100127270,100149690,100248226,100288764,100361240,100362159,100426906,100435666,100500676,100567784,100598170,100621227,100639297,100641121,100724626,100737074,100744428,100765144,100785761,100882983,100939362,100984584,100985042,	potentially_novel_isoform
mmu_circ_020183	chr1_102928950_102936642_F	circRNA	Yes	chr1	102928950	102936642	+	947	7692	7	0,358,4202,4670,4875,6319,7504	182,112,124,103,98,140,188	ENSMMUT00000030179	chr1:102923105-102928950|chr1:102936642-102938922	4	0	chr1	+	102910141	102980863	ENSMMUT00000030179	34	102910141,102910752,102919456,102920214,102922901,102928950,102929308,102933152,102933620,102933825,102935269,102936454,102938922,102939632,102940073,102940288,102940537,102943200,102943419,102943644,102947033,102950201,102950584,102951408,102955880,102959855,102961895,102968961,102970668,102971773,102973641,102975003,102975202,102980102,	102910193,102910902,102919667,102920381,102923105,102929132,102929420,102933276,102933723,102933923,102935409,102936642,102939046,102939796,102940175,102940444,102940688,102943325,102943532,102943779,102947164,102950338,102950718,102951584,102955983,102960081,102962007,102969097,102970781,102971985,102973739,102975091,102975336,102980863,	complete_match	ENSMMUG00000021441	102910142	102980863	102910142	102980863	+	AGL-201	AGL	protein_coding	protein_coding	ENSMMUP00000028242	XM_001106354	XP_001106231	amylo-alpha-1, 6-glucosidase, 4-alpha-glucanotransferase [Source:HGNC Symbol;Acc:HGNC:321]
mmu_circ_020189	chr1_102947033_102962007_F	circRNA	Yes	chr1	102947033	102962007	+	1019	14974	7	0,3168,3551,4375,8847,12822,14862	131,137,134,176,103,226,112	ENSMMUT00000030179	chr1:102943779-102947033|chr1:102962007-102968961	2	0	chr1	+	102910141	102980863	ENSMMUT00000030179	34	102910141,102910752,102919456,102920214,102922901,102928950,102929308,102933152,102933620,102933825,102935269,102936454,102938922,102939632,102940073,102940288,102940537,102943200,102943419,102943644,102947033,102950201,102950584,102951408,102955880,102959855,102961895,102968961,102970668,102971773,102973641,102975003,102975202,102980102,	102910193,102910902,102919667,102920381,102923105,102929132,102929420,102933276,102933723,102933923,102935409,102936642,102939046,102939796,102940175,102940444,102940688,102943325,102943532,102943779,102947164,102950338,102950718,102951584,102955983,102960081,102962007,102969097,102970781,102971985,102973739,102975091,102975336,102980863,	complete_match	ENSMMUG00000021441	102910142	102980863	102910142	102980863	+	AGL-201	AGL	protein_coding	protein_coding	ENSMMUP00000028242	XM_001106354	XP_001106231	amylo-alpha-1, 6-glucosidase, 4-alpha-glucanotransferase [Source:HGNC Symbol;Acc:HGNC:321]
mmu_circ_020190	chr1_102959855_102970781_F	circRNA	Yes	chr1	102959855	102970781	+	587	10926	4	0,2040,9106,10813	226,112,136,113	ENSMMUT00000030179	chr1:102955983-102959855|chr1:102970781-102971773	1	1	chr1	+	102910141	102980863	ENSMMUT00000030179	34	102910141,102910752,102919456,102920214,102922901,102928950,102929308,102933152,102933620,102933825,102935269,102936454,102938922,102939632,102940073,102940288,102940537,102943200,102943419,102943644,102947033,102950201,102950584,102951408,102955880,102959855,102961895,102968961,102970668,102971773,102973641,102975003,102975202,102980102,	102910193,102910902,102919667,102920381,102923105,102929132,102929420,102933276,102933723,102933923,102935409,102936642,102939046,102939796,102940175,102940444,102940688,102943325,102943532,102943779,102947164,102950338,102950718,102951584,102955983,102960081,102962007,102969097,102970781,102971985,102973739,102975091,102975336,102980863,	complete_match	ENSMMUG00000021441	102910142	102980863	102910142	102980863	+	AGL-201	AGL	protein_coding	protein_coding	ENSMMUP00000028242	XM_001106354	XP_001106231	amylo-alpha-1, 6-glucosidase, 4-alpha-glucanotransferase [Source:HGNC Symbol;Acc:HGNC:321]
mmu_circ_020193	chr1_103204207_103207829_F	circRNA	Yes	chr1	103204207	103207829	+	354	3622	5	0,143,2758,3289,3515	47,67,63,70,107	ENSMMUT00000006017	chr1:103200778-103204207|chr1:103207829-103208167	2	0	chr1	+	103200627	103216216	ENSMMUT00000006017	11	103200627,103204207,103204350,103206965,103207496,103207722,103208167,103210437,103211375,103215291,103216020,	103200778,103204254,103204417,103207028,103207566,103207829,103208335,103210510,103211450,103215724,103216216,	complete_match	ENSMMUG00000004243	103200628	103216216	103200628	103216216	+	TRMT13-201	TRMT13	protein_coding	protein_coding	ENSMMUP00000005664	XM_001106928	XP_001106928	Uncharacterized protein; tRNA guanosine-2'-O-methyltransferase TRM13 homolog [Source:UniProtKB/TrEMBL;Acc:F6YWH7]
mmu_circ_020197	chr1_103501295_103545334_F	circRNA	Yes	chr1	103501295	103545334	+	748	44039	6	0,2830,15288,22933,28273,43879	67,63,88,231,139,160	ENSMMUT00000026853	chr1:103485895-103501295|chr1:103545334-103555603	2	0	chr1	+	103417494	103580921	ENSMMUT00000026853	17	103417494,103417628,103418302,103438617,103452302,103485815,103501295,103504125,103516583,103524228,103529568,103545174,103555603,103556815,103558939,103559774,103578899,	103417536,103417635,103418393,103438693,103452395,103485895,103501362,103504188,103516671,103524459,103529707,103545334,103555719,103556863,103559062,103560108,103580921,	complete_match	ENSMMUG00000019106	103417495	103580921	103417031	103580921	+	CDC14A-203	CDC14A	protein_coding	protein_coding	ENSMMUP00000025126			cell division cycle 14A [Source:HGNC Symbol;Acc:HGNC:1718]
mmu_circ_020200	chr1_104055760_104074409_R	circRNA	Yes	chr1	104055760	104074409	-	270	18649	3	0,6343,18540	40,121,109	PREDICTED.22043.2	chr1:104053350-104055760|chr1:104074409-104082038	3	0	chr1	-	104048185	104086038	PREDICTED.22043.2	8	104048185,104053246,104055760,104062103,104074300,104082038,104085151,104085546,	104051252,104053350,104055800,104062224,104074409,104082163,104085309,104086038,	potentially_novel_isoform
mmu_circ_020201	chr1_106509820_106511958_F	circRNA	Yes	chr1	106509820	106511958	+	324	2138	3	0,775,1995	112,69,143	PREDICTED.22478.4	chr1:106508987-106509820|chr1:106511958-106515878	4	0	chr1	+	106508968	106516020	PREDICTED.22478.4	5	106508968,106509820,106510595,106511815,106515878,	106508987,106509932,106510664,106511958,106516020,	potentially_novel_isoform
mmu_circ_020205	chr1_110548932_110607084_R	circRNA	Yes	chr1	110548932	110607084	-	412	58152	5	0,36522,41448,57640,58050	137,46,26,101,102	ENSMMUT00000027705	chr1:110525791-110548932|chr1:110607084-110659187	2	1	chr1	-	110482576	110695882	ENSMMUT00000027705	27	110482576,110483471,110505041,110511215,110511866,110518132,110525725,110548932,110585454,110590380,110606572,110606982,110659187,110659681,110661354,110665593,110667407,110670808,110675357,110676759,110678740,110681042,110683164,110687702,110689854,110690076,110695839,	110482779,110483623,110505171,110511303,110511983,110518167,110525791,110549069,110585500,110590406,110606673,110607084,110659297,110659814,110661440,110665680,110667476,110670904,110675457,110676863,110678809,110681135,110683273,110687768,110689913,110690078,110695882,	complete_match	ENSMMUG00000019714	110482577	110695882	110480559	110877679	-	VAV3-202	VAV3	protein_coding	protein_coding	ENSMMUP00000025915			Uncharacterized protein [Source:UniProtKB/TrEMBL;Acc:F7BD31]
mmu_circ_020207	chr1_110670808_110681135_R	circRNA	Yes	chr1	110670808	110681135	-	462	10327	5	0,4549,5951,7932,10234	96,100,104,69,93	ENSMMUT00000027705	chr1:110667476-110670808|chr1:110681135-110683164	2	0	chr1	-	110482576	110695882	ENSMMUT00000027705	27	110482576,110483471,110505041,110511215,110511866,110518132,110525725,110548932,110585454,110590380,110606572,110606982,110659187,110659681,110661354,110665593,110667407,110670808,110675357,110676759,110678740,110681042,110683164,110687702,110689854,110690076,110695839,	110482779,110483623,110505171,110511303,110511983,110518167,110525791,110549069,110585500,110590406,110606673,110607084,110659297,110659814,110661440,110665680,110667476,110670904,110675457,110676863,110678809,110681135,110683273,110687768,110689913,110690078,110695882,	complete_match	ENSMMUG00000019714	110482577	110695882	110480559	110877679	-	VAV3-202	VAV3	protein_coding	protein_coding	ENSMMUP00000025915			Uncharacterized protein [Source:UniProtKB/TrEMBL;Acc:F7BD31]
mmu_circ_020209	chr1_111749218_111757018_F	circRNA	Yes	chr1	111749218	111757018	+	389	7800	5	0,810,4414,6228,7699	50,82,77,79,101	ENSMMUT00000014184	chr1:111740450-111749218|chr1:111757018-111766286	3	1	chr1	+	111740349	111798868	ENSMMUT00000014184	19	111740349,111749218,111750028,111753632,111755446,111756917,111766286,111771816,111774783,111778246,111778473,111783238,111784491,111785901,111786286,111787814,111789897,111797051,111798127,	111740450,111749268,111750110,111753709,111755525,111757018,111766441,111771907,111774908,111778342,111778531,111783304,111784572,111786040,111786393,111787907,111789983,111797200,111798868,	complete_match	ENSMMUG00000010158	111740350	111798868	111740350	111798868	+	STXBP3-201	STXBP3	protein_coding	protein_coding	ENSMMUP00000013283	XM_001087621	XP_001087621	syntaxin binding protein 3 [Source:HGNC Symbol;Acc:HGNC:11446]
mmu_circ_020213	chr1_111783238_111789983_F	circRNA	Yes	chr1	111783238	111789983	+	572	6745	6	0,1253,2663,3048,4576,6659	66,81,139,107,93,86	ENSMMUT00000014184	chr1:111778531-111783238|chr1:111789983-111797051	0	3	chr1	+	111740349	111798868	ENSMMUT00000014184	19	111740349,111749218,111750028,111753632,111755446,111756917,111766286,111771816,111774783,111778246,111778473,111783238,111784491,111785901,111786286,111787814,111789897,111797051,111798127,	111740450,111749268,111750110,111753709,111755525,111757018,111766441,111771907,111774908,111778342,111778531,111783304,111784572,111786040,111786393,111787907,111789983,111797200,111798868,	complete_match	ENSMMUG00000010158	111740350	111798868	111740350	111798868	+	STXBP3-201	STXBP3	protein_coding	protein_coding	ENSMMUP00000013283	XM_001087621	XP_001087621	syntaxin binding protein 3 [Source:HGNC Symbol;Acc:HGNC:11446]
mmu_circ_020214	chr1_111917974_111919092_F	circRNA	Yes	chr1	111917974	111919092	+	239	1118	2	0,988	109,130	PREDICTED.6175.1	chr1:111916530-111917974|chr1:111919092-111929272	0	2	chr1	+	111892097	111929335	PREDICTED.6175.1	11	111892097,111900203,111911447,111912062,111912532,111913217,111913454,111916374,111917974,111918962,111929272,	111892193,111900507,111911669,111912198,111912678,111913341,111913570,111916530,111918083,111919092,111929335,	potentially_novel_isoform
mmu_circ_020215	chr1_111964348_111971286_R	circRNA	Yes	chr1	111964348	111971286	-	703	6938	5	0,361,4086,6313,6808	141,222,108,102,130	ENSMMUT00000000566	chr1:111962368-111964348|chr1:111971286-111985137	3	0	chr1	-	111947497	111985244	ENSMMUT00000000566	12	111947497,111949503,111956212,111959974,111960386,111962274,111964348,111964709,111968434,111970661,111971156,111985137,	111947627,111949821,111956554,111960121,111960484,111962368,111964489,111964931,111968542,111970763,111971286,111985244,	complete_match	ENSMMUG00000000390	111947498	111985244	111946591	111985244	-	CLCC1-202	CLCC1	protein_coding	protein_coding	ENSMMUP00000000520	XM_001087523	XP_001087523	chloride channel CLIC-like 1 [Source:HGNC Symbol;Acc:HGNC:29675]
mmu_circ_020216	chr1_112023210_112025371_R	circRNA	Yes	chr1	112023210	112025371	-	303	2161	2	0,2037	179,124	PREDICTED.6352.4	chr1:112016940-112023210|chr1:112025371-112031653	0	2	chr1	-	111991974	112062888	PREDICTED.6352.4	15	111991974,111996093,112002663,112003545,112004216,112008055,112012751,112016682,112023210,112025247,112031653,112034569,112038226,112044086,112062622,	111993333,111996308,112002799,112003716,112004386,112008213,112012827,112016940,112023389,112025371,112032456,112034654,112038310,112044253,112062888,	potentially_novel_isoform
mmu_circ_020218	chr1_112382882_112401812_R	circRNA	Yes	chr1	112382882	112401812	-	811	18930	6	0,506,9182,13397,14676,18799	169,103,107,156,145,131	PREDICTED.6531.1	chr1:112381193-112382882|chr1:112401812-112402815	3	0	chr1	-	112365166	112454834	PREDICTED.6531.1	21	112365166,112369740,112370147,112372616,112373627,112379044,112381002,112382882,112383388,112392064,112396279,112397558,112401681,112402815,112406246,112409985,112411317,112424092,112426213,112454523,112454652,	112369522,112369864,112370254,112372725,112373744,112379234,112381193,112383051,112383491,112392171,112396435,112397703,112401812,112402865,112406320,112410150,112411419,112424166,112426273,112454625,112454834,	complete_match
mmu_circ_020220	chr1_112396279_112401812_R	circRNA	Yes	chr1	112396279	112401812	-	432	5533	3	0,1279,5402	156,145,131	PREDICTED.6531.1	chr1:112392171-112396279|chr1:112401812-112402815	1	3	chr1	-	112365166	112454834	PREDICTED.6531.1	21	112365166,112369740,112370147,112372616,112373627,112379044,112381002,112382882,112383388,112392064,112396279,112397558,112401681,112402815,112406246,112409985,112411317,112424092,112426213,112454523,112454652,	112369522,112369864,112370254,112372725,112373744,112379234,112381193,112383051,112383491,112392171,112396435,112397703,112401812,112402865,112406320,112410150,112411419,112424166,112426273,112454625,112454834,	complete_match
mmu_circ_020223	chr1_112424092_112426273_R	circRNA	Yes	chr1	112424092	112426273	-	134	2181	2	0,2121	74,60	PREDICTED.6531.1	chr1:112411419-112424092|chr1:112426273-112454523	0	2	chr1	-	112365166	112454834	PREDICTED.6531.1	21	112365166,112369740,112370147,112372616,112373627,112379044,112381002,112382882,112383388,112392064,112396279,112397558,112401681,112402815,112406246,112409985,112411317,112424092,112426213,112454523,112454652,	112369522,112369864,112370254,112372725,112373744,112379234,112381193,112383051,112383491,112392171,112396435,112397703,112401812,112402865,112406320,112410150,112411419,112424166,112426273,112454625,112454834,	complete_match
mmu_circ_020231	chr1_11517859_11529224_R	circRNA	Yes	chr1	11517859	11529224	-	274	11365	3	0,2361,11316	100,125,49	ENSMMUT00000047610	chr1:11486142-11517859|chr1:11529224-11564080	1	1	chr1	-	11378963	11846913	ENSMMUT00000047610	24	11378963,11382034,11382738,11384872,11386427,11386775,11388427,11389336,11390688,11391380,11392426,11448370,11486043,11517859,11520220,11529175,11564080,11578460,11579414,11637686,11648089,11679776,11820105,11846607,	11381711,11382215,11382885,11385593,11386650,11388154,11388541,11389498,11390888,11391473,11392589,11448451,11486142,11517959,11520345,11529224,11564185,11578557,11579520,11637812,11648160,11680245,11820290,11846913,	complete_match	ENSMMUG00000021399	11378964	11846913	11378964	11846913	-	RERE-201	RERE	protein_coding	protein_coding	ENSMMUP00000040633	XM_001097585	XP_001097585	Arginine-glutamic acid dipeptide repeats protein isoform a; Uncharacterized protein [Source:UniProtKB/TrEMBL;Acc:F7GDT6]
mmu_circ_020232	chr1_11529175_11579520_R	circRNA	Yes	chr1	11529175	11579520	-	357	50345	4	0,34905,49285,50239	49,105,97,106	ENSMMUT00000047610	chr1:11520345-11529175|chr1:11579520-11637686	2	0	chr1	-	11378963	11846913	ENSMMUT00000047610	24	11378963,11382034,11382738,11384872,11386427,11386775,11388427,11389336,11390688,11391380,11392426,11448370,11486043,11517859,11520220,11529175,11564080,11578460,11579414,11637686,11648089,11679776,11820105,11846607,	11381711,11382215,11382885,11385593,11386650,11388154,11388541,11389498,11390888,11391473,11392589,11448451,11486142,11517959,11520345,11529224,11564185,11578557,11579520,11637812,11648160,11680245,11820290,11846913,	complete_match	ENSMMUG00000021399	11378964	11846913	11378964	11846913	-	RERE-201	RERE	protein_coding	protein_coding	ENSMMUP00000040633	XM_001097585	XP_001097585	Arginine-glutamic acid dipeptide repeats protein isoform a; Uncharacterized protein [Source:UniProtKB/TrEMBL;Acc:F7GDT6]
mmu_circ_020233	chr1_115391206_115395241_F	circRNA	Yes	chr1	115391206	115395241	+	234	4035	2	0,3927	126,108	PREDICTED.25734.1	chr1:115375753-115391206|chr1:115395241-115429826	3	0	chr1	+	115375695	115442541	PREDICTED.25734.1	6	115375695,115391206,115395133,115429826,115435586,115437059,	115375753,115391332,115395241,115430057,115435694,115442541,	potentially_novel_isoform
mmu_circ_020234	chr1_115533544_115603748_R	circRNA	Yes	chr1	115533544	115603748	-	1248	70204	11	0,14695,36041,37371,41051,41433,43014,50804,57770,60342,70041	140,151,103,73,115,98,155,79,116,55,163	ENSMMUT00000046360	chr1:115516789-115533544|chr1:115603748-115609865	4	3	chr1	-	115514973	115611386	ENSMMUT00000046360	14	115514973,115533544,115548239,115569585,115570915,115574595,115574977,115576558,115584348,115591314,115593886,115603585,115609865,115611349,	115516789,115533684,115548390,115569688,115570988,115574710,115575075,115576713,115584427,115591430,115593941,115603748,115609948,115611386,	complete_match	ENSMMUG00000007766	115514974	115611386	115514222	115613121	-	ST7L-202	ST7L	protein_coding	protein_coding	ENSMMUP00000039402	XM_001107557	XP_001107557	Uncharacterized protein [Source:UniProtKB/TrEMBL;Acc:F7CW28]
mmu_circ_020235	chr1_115533544_115609948_R	circRNA	Yes	chr1	115533544	115609948	-	1331	76404	12	0,14695,36041,37371,41051,41433,43014,50804,57770,60342,70041,76321	140,151,103,73,115,98,155,79,116,55,163,83	ENSMMUT00000046360	chr1:115516789-115533544|chr1:115609948-115611349	2	1	chr1	-	115514973	115611386	ENSMMUT00000046360	14	115514973,115533544,115548239,115569585,115570915,115574595,115574977,115576558,115584348,115591314,115593886,115603585,115609865,115611349,	115516789,115533684,115548390,115569688,115570988,115574710,115575075,115576713,115584427,115591430,115593941,115603748,115609948,115611386,	complete_match	ENSMMUG00000007766	115514974	115611386	115514222	115613121	-	ST7L-202	ST7L	protein_coding	protein_coding	ENSMMUP00000039402	XM_001107557	XP_001107557	Uncharacterized protein [Source:UniProtKB/TrEMBL;Acc:F7CW28]
mmu_circ_020238	chr1_115548239_115591430_R	circRNA	Yes	chr1	115548239	115591430	-	890	43191	8	0,21346,22676,26356,26738,28319,36109,43075	151,103,73,115,98,155,79,116	ENSMMUT00000046360	chr1:115533684-115548239|chr1:115591430-115593886	1	1	chr1	-	115514973	115611386	ENSMMUT00000046360	14	115514973,115533544,115548239,115569585,115570915,115574595,115574977,115576558,115584348,115591314,115593886,115603585,115609865,115611349,	115516789,115533684,115548390,115569688,115570988,115574710,115575075,115576713,115584427,115591430,115593941,115603748,115609948,115611386,	complete_match	ENSMMUG00000007766	115514974	115611386	115514222	115613121	-	ST7L-202	ST7L	protein_coding	protein_coding	ENSMMUP00000039402	XM_001107557	XP_001107557	Uncharacterized protein [Source:UniProtKB/TrEMBL;Acc:F7CW28]
mmu_circ_020243	chr1_11578460_11579520_R	circRNA	Yes	chr1	11578460	11579520	-	203	1060	2	0,954	97,106	ENSMMUT00000047610	chr1:11564185-11578460|chr1:11579520-11637686	2	0	chr1	-	11378963	11846913	ENSMMUT00000047610	24	11378963,11382034,11382738,11384872,11386427,11386775,11388427,11389336,11390688,11391380,11392426,11448370,11486043,11517859,11520220,11529175,11564080,11578460,11579414,11637686,11648089,11679776,11820105,11846607,	11381711,11382215,11382885,11385593,11386650,11388154,11388541,11389498,11390888,11391473,11392589,11448451,11486142,11517959,11520345,11529224,11564185,11578557,11579520,11637812,11648160,11680245,11820290,11846913,	complete_match	ENSMMUG00000021399	11378964	11846913	11378964	11846913	-	RERE-201	RERE	protein_coding	protein_coding	ENSMMUP00000040633	XM_001097585	XP_001097585	Arginine-glutamic acid dipeptide repeats protein isoform a; Uncharacterized protein [Source:UniProtKB/TrEMBL;Acc:F7GDT6]
mmu_circ_020245	chr1_116085383_116111517_F	circRNA	Yes	chr1	116085383	116111517	+	2279	26134	16	0,2585,2819,3510,3783,5043,5390,8802,10593,10802,10934,11013,21424,21568,23793,25684	66,75,135,144,144,144,144,81,72,69,56,46,50,321,282,450	PREDICTED.24530.2	chr1:116064192-116085383|chr1:116111517-116113155	1	1	chr1	+	116063738	116124922	PREDICTED.24530.2	20	116063738,116085383,116087968,116088202,116088893,116089166,116090426,116090773,116094185,116095976,116096185,116096317,116096396,116106807,116106951,116109176,116111067,116113155,116115767,116120648,	116064192,116085449,116088043,116088337,116089037,116089310,116090570,116090917,116094266,116096048,116096254,116096373,116096442,116106857,116107272,116109458,116111517,116113305,116116058,116124922,	complete_match
mmu_circ_020247	chr1_116815481_116820294_R	circRNA	Yes	chr1	116815481	116820294	-	356	4813	4	0,358,3510,4682	116,81,28,131	PREDICTED.6683.2	chr1:116811409-116815481|chr1:116820294-116820768	0	2	chr1	-	116798268	116839020	PREDICTED.6683.2	11	116798268,116803893,116811378,116815481,116815839,116818991,116820163,116820768,116823423,116824377,116838502,	116799401,116803971,116811409,116815597,116815920,116819019,116820294,116820852,116824241,116824454,116839020,	potentially_novel_isoform
mmu_circ_020248	chr1_116893426_116897775_R	circRNA	Yes	chr1	116893426	116897775	-	964	4349	5	0,883,2065,3699,4218	104,84,497,148,131	PREDICTED.24632.1	chr1:116892066-116893426|chr1:116897775-116898541	2	0	chr1	-	116890597	116901354	PREDICTED.24632.1	11	116890597,116891357,116891858,116893426,116894309,116895491,116897125,116897644,116898541,116900507,116900844,	116891092,116891639,116892066,116893530,116894393,116895988,116897273,116897775,116898766,116900696,116901354,	potentially_novel_isoform
mmu_circ_020251	chr1_117409853_117421999_R	circRNA	Yes	chr1	117409853	117421999	-	1138	12146	7	0,3105,3963,5693,6265,9186,12029	201,165,275,118,147,115,117	PREDICTED.24712.1	chr1:117398424-117409853|chr1:117421999-117449388	2	0	chr1	-	117383331	117450778	PREDICTED.24712.1	19	117383331,117386005,117387499,117389429,117390837,117393488,117395027,117396779,117398291,117409853,117412958,117413816,117415546,117416118,117419039,117421882,117449388,117449688,117450548,	117385926,117386056,117387652,117389504,117390961,117393838,117395187,117396843,117398424,117410054,117413123,117414091,117415664,117416265,117419154,117421999,117449521,117449833,117450778,	potentially_novel_isoform
mmu_circ_020256	chr1_118999424_119000726_F	circRNA	Yes	chr1	118999424	119000726	+	298	1302	2	0,1137	133,165	PREDICTED.6918.2	chr1:118978148-118999424|chr1:119000726-119007050	0	2	chr1	+	118978111	119049536	PREDICTED.6918.2	11	118978111,118999424,119000561,119007050,119011412,119015214,119017330,119042592,119044252,119046649,119047143,	118978148,118999557,119000726,119007180,119011628,119015355,119017416,119042713,119044325,119046838,119049536,	potentially_novel_isoform
mmu_circ_020259	chr1_120407067_120431644_F	circRNA	Yes	chr1	120407067	120431644	+	313	24577	3	0,18725,24483	95,124,94	PREDICTED.25395.2	chr1:120386868-120407067|chr1:120431644-120466394	2	0	chr1	+	120339263	120488947	PREDICTED.25395.2	14	120339263,120368309,120371684,120380945,120386787,120407067,120425792,120431550,120466394,120469923,120472634,120476122,120488301,120488408,	120340256,120368565,120371785,120381060,120386868,120407162,120425916,120431644,120466510,120470143,120472807,120476238,120488302,120488947,	potentially_novel_isoform
mmu_circ_020261	chr1_121839095_121840742_R	ciRNA	Yes	chr1	121839095	121840742	-	1647	1647	1	0	1647	PREDICTED.26000.1	chr1:121839060-121840742	2	0	chr1	-	121794713	121902453	PREDICTED.26000.1	8	121794713,121812081,121827141,121837672,121838888,121840742,121846528,121901703,	121798631,121812179,121827206,121837840,121839060,121840844,121846742,121902453,	complete_match
mmu_circ_020268	chr1_123282703_123283465_F	ciRNA	Yes	chr1	123282703	123283465	+	762	762	1	0	762	PREDICTED.7365.3	chr1:123282703-123283467	0	2	chr1	+	123152420	123295976	PREDICTED.7365.3	23	123152420,123169544,123174762,123202081,123240890,123245690,123246003,123252222,123276502,123277688,123278043,123278275,123281221,123282269,123282565,123283467,123287934,123288268,123289077,123292505,123292846,123294315,123295848,	123153010,123169600,123174914,123202192,123240967,123245814,123246179,123252340,123276634,123277808,123278136,123278488,123281380,123282383,123282703,123283647,123288102,123288350,123289169,123292622,123292984,123294428,123295976,	potentially_novel_isoform
mmu_circ_020269	chr1_123292505_123292984_F	circRNA	Yes	chr1	123292505	123292984	+	255	479	2	0,341	117,138	PREDICTED.26128.1	chr1:123289169-123292505|chr1:123292984-123294315	3	4	chr1	+	123284843	123341753	PREDICTED.26128.1	25	123284843,123288268,123289077,123292505,123292846,123294315,123295848,123312345,123315820,123317096,123317824,123319126,123321452,123322693,123323832,123324702,123327195,123330903,123332351,123333150,123334745,123335559,123338658,123340941,123341620,	123288102,123288350,123289169,123292622,123292984,123294428,123295976,123312578,123316256,123317289,123317944,123319655,123321688,123322745,123324056,123324855,123327381,123331155,123332483,123333270,123334935,123335684,123338898,123341058,123341753,	ref_exonic_overlap
mmu_circ_020270	chr1_123321452_123324855_F	circRNA	Yes	chr1	123321452	123324855	+	665	3403	4	0,1241,2380,3250	236,52,224,153	PREDICTED.26128.1	chr1:123319655-123321452|chr1:123324855-123327195	1	2	chr1	+	123284843	123341753	PREDICTED.26128.1	25	123284843,123288268,123289077,123292505,123292846,123294315,123295848,123312345,123315820,123317096,123317824,123319126,123321452,123322693,123323832,123324702,123327195,123330903,123332351,123333150,123334745,123335559,123338658,123340941,123341620,	123288102,123288350,123289169,123292622,123292984,123294428,123295976,123312578,123316256,123317289,123317944,123319655,123321688,123322745,123324056,123324855,123327381,123331155,123332483,123333270,123334935,123335684,123338898,123341058,123341753,	ref_exonic_overlap
mmu_circ_020271	chr1_123324056_123324667_F	ciRNA	Yes	chr1	123324056	123324667	+	611	611	1	0	611	PREDICTED.26128.1	chr1:123324056-123324702	2	0	chr1	+	123284843	123341753	PREDICTED.26128.1	25	123284843,123288268,123289077,123292505,123292846,123294315,123295848,123312345,123315820,123317096,123317824,123319126,123321452,123322693,123323832,123324702,123327195,123330903,123332351,123333150,123334745,123335559,123338658,123340941,123341620,	123288102,123288350,123289169,123292622,123292984,123294428,123295976,123312578,123316256,123317289,123317944,123319655,123321688,123322745,123324056,123324855,123327381,123331155,123332483,123333270,123334935,123335684,123338898,123341058,123341753,	ref_exonic_overlap
mmu_circ_020272	chr1_123324702_123324855_F	circRNA	Yes	chr1	123324702	123324855	+	153	153	1	0	153	PREDICTED.26128.1	chr1:123324056-123324702|chr1:123324855-123327195	2	0	chr1	+	123284843	123341753	PREDICTED.26128.1	25	123284843,123288268,123289077,123292505,123292846,123294315,123295848,123312345,123315820,123317096,123317824,123319126,123321452,123322693,123323832,123324702,123327195,123330903,123332351,123333150,123334745,123335559,123338658,123340941,123341620,	123288102,123288350,123289169,123292622,123292984,123294428,123295976,123312578,123316256,123317289,123317944,123319655,123321688,123322745,123324056,123324855,123327381,123331155,123332483,123333270,123334935,123335684,123338898,123341058,123341753,	ref_exonic_overlap
mmu_circ_020275	chr1_125948025_125992972_R	circRNA	Yes	chr1	125948025	125992972	-	661	44947	7	0,2416,4986,26334,40161,42956,44888	116,94,72,209,58,53,59	PREDICTED.26261.1	chr1:125947017-125948025|chr1:125992972-126029252	2	0	chr1	-	125939051	126029602	PREDICTED.26261.1	9	125939051,125948025,125950441,125953011,125974359,125988186,125990981,125992913,126029252,	125947017,125948141,125950535,125953083,125974568,125988244,125991034,125992972,126029602,	potentially_novel_isoform
mmu_circ_020278	chr1_126658131_126662626_F	circRNA	Yes	chr1	126658131	126662626	+	509	4495	4	0,1521,3031,4398	163,156,93,97	ENSMMUT00000012619	chr1:126654193-126658131|chr1:126662626-126669057	3	0	chr1	+	126645945	126689511	ENSMMUT00000012619	20	126645945,126648189,126649127,126649845,126654111,126658131,126659652,126661162,126662529,126669057,126669794,126673724,126678119,126679102,126680084,126681431,126685241,126687374,126688148,126689182,	126646060,126648296,126649242,126649877,126654193,126658294,126659808,126661255,126662626,126669172,126669948,126673890,126678268,126679266,126680290,126681530,126685312,126687489,126688257,126689511,	complete_match	ENSMMUG00000009024	126645946	126689511	126645940	126689517	+	CHD1L-204	CHD1L	protein_coding	protein_coding	ENSMMUP00000011833			chromodomain helicase DNA binding protein 1-like [Source:HGNC Symbol;Acc:HGNC:1916]
mmu_circ_020279	chr1_126658131_126673890_F	circRNA	Yes	chr1	126658131	126673890	+	944	15759	7	0,1521,3031,4398,10926,11663,15593	163,156,93,97,115,154,166	ENSMMUT00000012619	chr1:126654193-126658131|chr1:126673890-126678119	2	1	chr1	+	126645945	126689511	ENSMMUT00000012619	20	126645945,126648189,126649127,126649845,126654111,126658131,126659652,126661162,126662529,126669057,126669794,126673724,126678119,126679102,126680084,126681431,126685241,126687374,126688148,126689182,	126646060,126648296,126649242,126649877,126654193,126658294,126659808,126661255,126662626,126669172,126669948,126673890,126678268,126679266,126680290,126681530,126685312,126687489,126688257,126689511,	complete_match	ENSMMUG00000009024	126645946	126689511	126645940	126689517	+	CHD1L-204	CHD1L	protein_coding	protein_coding	ENSMMUP00000011833			chromodomain helicase DNA binding protein 1-like [Source:HGNC Symbol;Acc:HGNC:1916]
mmu_circ_020281	chr1_126679266_126680077_F	ciRNA	Yes	chr1	126679266	126680077	+	811	811	1	0	811	ENSMMUT00000012619	chr1:126679266-126680084	2	0	chr1	+	126645945	126689511	ENSMMUT00000012619	20	126645945,126648189,126649127,126649845,126654111,126658131,126659652,126661162,126662529,126669057,126669794,126673724,126678119,126679102,126680084,126681431,126685241,126687374,126688148,126689182,	126646060,126648296,126649242,126649877,126654193,126658294,126659808,126661255,126662626,126669172,126669948,126673890,126678268,126679266,126680290,126681530,126685312,126687489,126688257,126689511,	complete_match	ENSMMUG00000009024	126645946	126689511	126645940	126689517	+	CHD1L-204	CHD1L	protein_coding	protein_coding	ENSMMUP00000011833			chromodomain helicase DNA binding protein 1-like [Source:HGNC Symbol;Acc:HGNC:1916]
mmu_circ_020285	chr1_128698407_128699055_F	ciRNA	Yes	chr1	128698407	128699055	+	648	648	1	0	648	ENSMMUT00000022895	chr1:128698407-128699060	0	2	chr1	+	128694889	128727818	ENSMMUT00000022895	16	128694889,128698214,128699060,128701629,128706255,128706554,128709009,128711933,128714209,128717378,128718170,128718442,128720028,128720417,128723170,128727455,	128694929,128698407,128699191,128701776,128706339,128706775,128709316,128712100,128714289,128717522,128718270,128718556,128720147,128720501,128723232,128727818,	complete_match	ENSMMUG00000016301	128694890	128727818	128694890	128727818	+	PRPF3-201	PRPF3	protein_coding	protein_coding	ENSMMUP00000021413	XM_001101105	XP_001101105	pre-mRNA processing factor 3 [Source:HGNC Symbol;Acc:HGNC:17348]
mmu_circ_020291	chr1_129221702_129231902_R	circRNA	Yes	chr1	129221702	129231902	-	338	10200	3	0,6202,10125	111,152,75	PREDICTED.26911.1	chr1:129221217-129221702|chr1:129231902-129231934	2	0	chr1	-	129199680	129247774	PREDICTED.26911.1	26	129199680,129202693,129203068,129207578,129209413,129209654,129210239,129211721,129216947,129218167,129220042,129220571,129220865,129221144,129221702,129227904,129231827,129231934,129234180,129234916,129236843,129237334,129239533,129241244,129244720,129247679,	129200410,129202799,129203234,129207797,129209569,129209777,129210363,129215575,129217114,129218330,129220190,129220674,129220986,129221217,129221813,129228056,129231902,129232001,129234233,129234993,129236929,129237400,129239660,129241458,129244934,129247774,	potentially_novel_isoform
mmu_circ_020297	chr1_129559293_129559448_R	ciRNA	Yes	chr1	129559293	129559448	-	155	155	1	0	155	PREDICTED.27214.1	chr1:129559274-129559448	2	0	chr1	-	129556233	129565552	PREDICTED.27214.1	16	129556233,129559229,129559448,129559623,129559986,129560416,129560834,129561273,129561687,129562542,129562805,129563135,129563449,129564235,129564449,129564707,	129558159,129559274,129559504,129559701,129560133,129560590,129560987,129561405,129561905,129562631,129562925,129563226,129563551,129564292,129564513,129565552,	potentially_novel_isoform
mmu_circ_020298	chr1_129562542_129564922_R	circRNA	Yes	chr1	129562542	129564922	-	638	2380	7	0,263,593,907,1693,1907,2265	89,120,91,102,57,64,115	ENSMMUT00000010708	chr1:129561905-129562542|chr1:129564922-129567104	0	3	chr1	-	129556530	129571162	ENSMMUT00000010708	19	129556530,129559229,129559448,129559623,129559986,129560416,129560834,129561273,129561687,129562542,129562805,129563135,129563449,129564235,129564449,129564807,129567104,129569009,129571079,	129558358,129559274,129559504,129559701,129560133,129560590,129560987,129561405,129561905,129562631,129562925,129563226,129563551,129564292,129564513,129564922,129567276,129569059,129571162,	complete_match	ENSMMUG00000007643	129556531	129571162	129556531	129571258	-	SEMA6C-202	SEMA6C	protein_coding	protein_coding	ENSMMUP00000010045	XM_001104082	XP_001104082	Uncharacterized protein [Source:UniProtKB/TrEMBL;Acc:F7AIP9]
mmu_circ_020299	chr1_129652002_129669275_F	circRNA	Yes	chr1	129652002	129669275	+	1239	17273	10	0,3095,7896,8475,8778,10668,13757,15422,16368,17188	32,81,131,118,153,300,206,84,49,85	PREDICTED.27052.1	chr1:129627641-129652002|chr1:129669275-129671368	2	0	chr1	+	129627117	129680006	PREDICTED.27052.1	15	129627117,129652002,129655097,129659898,129660477,129660780,129662670,129665759,129667424,129668370,129669190,129671368,129671683,129677146,129678177,	129627641,129652034,129655178,129660029,129660595,129660933,129662970,129665965,129667508,129668419,129669275,129671515,129671813,129677192,129680006,	potentially_novel_isoform
mmu_circ_020300	chr1_129659898_129660595_F	circRNA	Yes	chr1	129659898	129660595	+	249	697	2	0,579	131,118	PREDICTED.27052.1	chr1:129655178-129659898|chr1:129660595-129660780	2	0	chr1	+	129627117	129680006	PREDICTED.27052.1	15	129627117,129652002,129655097,129659898,129660477,129660780,129662670,129665759,129667424,129668370,129669190,129671368,129671683,129677146,129678177,	129627641,129652034,129655178,129660029,129660595,129660933,129662970,129665965,129667508,129668419,129669275,129671515,129671813,129677192,129680006,	potentially_novel_isoform
mmu_circ_020301	chr1_129671368_129677192_F	circRNA	Yes	chr1	129671368	129677192	+	323	5824	3	0,315,5778	147,130,46	PREDICTED.27052.1	chr1:129669275-129671368|chr1:129677192-129678177	2	0	chr1	+	129627117	129680006	PREDICTED.27052.1	15	129627117,129652002,129655097,129659898,129660477,129660780,129662670,129665759,129667424,129668370,129669190,129671368,129671683,129677146,129678177,	129627641,129652034,129655178,129660029,129660595,129660933,129662970,129665965,129667508,129668419,129669275,129671515,129671813,129677192,129680006,	potentially_novel_isoform
mmu_circ_020304	chr1_130076449_130076681_F	circRNA	Yes	chr1	130076449	130076681	+	232	232	1	0	232	PREDICTED.27827.1	chr1:130049972-130076449|chr1:130076681-130093622	2	0	chr1	+	130048701	130138620	PREDICTED.27827.1	12	130048701,130076449,130093622,130096359,130097693,130097964,130103260,130123373,130134348,130134824,130135337,130135505,	130049972,130076681,130093815,130096424,130097798,130097989,130103478,130123463,130134498,130134953,130135397,130138620,	complete_match
mmu_circ_020305	chr1_130076449_130135397_F	circRNA	Yes	chr1	130076449	130135397	+	1267	58948	10	0,17173,19910,21244,21515,26811,46924,57899,58375,58888	232,193,65,105,25,218,90,150,129,60	PREDICTED.27827.1	chr1:130049972-130076449|chr1:130135397-130135505	4	0	chr1	+	130048701	130138620	PREDICTED.27827.1	12	130048701,130076449,130093622,130096359,130097693,130097964,130103260,130123373,130134348,130134824,130135337,130135505,	130049972,130076681,130093815,130096424,130097798,130097989,130103478,130123463,130134498,130134953,130135397,130138620,	complete_match
mmu_circ_020308	chr1_1315206_1318961_R	circRNA	Yes	chr1	1315206	1318961	-	690	3755	4	0,297,3258,3642	180,154,243,113	PREDICTED.192.6	chr1:1305764-1315206|chr1:1318961-1320629	0	2	chr1	-	1303232	1347762	PREDICTED.192.6	9	1303232,1315206,1315503,1318464,1318848,1320629,1331646,1338270,1347404,	1305764,1315386,1315657,1318707,1318961,1320707,1331794,1338395,1347762,	potentially_novel_isoform
mmu_circ_020314	chr1_13214443_13219055_F	circRNA	Yes	chr1	13214443	13219055	+	529	4612	4	0,214,1861,4413	117,99,114,199	PREDICTED.2737.2	chr1:13213376-13214443|chr1:13219055-13221218	2	0	chr1	+	13119031	13221580	PREDICTED.2737.2	16	13119031,13158958,13176900,13183733,13187341,13189447,13200344,13202393,13204868,13210091,13213319,13214443,13214657,13216304,13218856,13221218,	13119747,13159145,13177036,13183821,13187486,13189676,13200486,13202494,13204983,13210175,13213376,13214560,13214756,13216418,13219055,13221580,	potentially_novel_isoform
mmu_circ_020317	chr1_13229799_13246774_F	circRNA	Yes	chr1	13229799	13246774	+	835	16975	6	0,1807,4778,6611,13699,16830	100,128,99,236,127,145	ENSMMUT00000022893	chr1:13221357-13229799|chr1:13246774-13254607	2	0	chr1	+	13119654	13267324	ENSMMUT00000022893	28	13119654,13158958,13176900,13183733,13187341,13189447,13190128,13200344,13202393,13204868,13210091,13213319,13214443,13214657,13216304,13218856,13221218,13229799,13231606,13234577,13236410,13243498,13246629,13254607,13257835,13265168,13265936,13266411,	13119747,13159145,13177036,13183821,13187486,13189676,13190515,13200486,13202494,13204983,13210175,13213376,13214560,13214756,13216418,13219055,13221357,13229899,13231734,13234676,13236646,13243625,13246774,13254742,13258027,13265343,13266083,13267324,	complete_match	ENSMMUG00000016296	13119655	13267324	13119032	13267324	+	UBE4B-202	UBE4B	protein_coding	protein_coding	ENSMMUP00000021411	XM_001101836	XP_001101836	ubiquitination factor E4B [Source:HGNC Symbol;Acc:HGNC:12500]
mmu_circ_020328	chr1_132748193_132749628_F	circRNA	Yes	chr1	132748193	132749628	+	189	1435	2	0,1324	78,111	ENSMMUT00000045894	chr1:132746226-132748193|chr1:132749628-132759866	2	0	chr1	+	132740986	132792087	ENSMMUT00000045894	25	132740986,132746096,132748193,132749517,132759866,132760474,132763264,132763717,132768586,132770280,132773527,132776358,132778217,132778659,132782044,132782976,132783291,132783828,132785219,132785502,132787154,132788238,132789191,132789891,132791390,	132741049,132746226,132748271,132749628,132760035,132760570,132763310,132763830,132768639,132770366,132773699,132776557,132778495,132778832,132782234,132783031,132783466,132783901,132785415,132785591,132787208,132788320,132789409,132789997,132792087,	complete_match	ENSMMUG00000010810	132740987	132792087	132740987	132800060	+	UBAP2L-201	UBAP2L	protein_coding	protein_coding	ENSMMUP00000038934	XM_001114022	XP_001114022	Ubiquitin-associated protein 2-like isoform b; Uncharacterized protein [Source:UniProtKB/TrEMBL;Acc:F6VRQ3]
mmu_circ_020331	chr1_132782044_132788320_F	circRNA	Yes	chr1	132782044	132788320	+	914	6276	8	0,932,1247,1784,3175,3458,5110,6194	190,55,175,73,196,89,54,82	ENSMMUT00000045894	chr1:132778832-132782044|chr1:132788320-132789191	2	0	chr1	+	132740986	132792087	ENSMMUT00000045894	25	132740986,132746096,132748193,132749517,132759866,132760474,132763264,132763717,132768586,132770280,132773527,132776358,132778217,132778659,132782044,132782976,132783291,132783828,132785219,132785502,132787154,132788238,132789191,132789891,132791390,	132741049,132746226,132748271,132749628,132760035,132760570,132763310,132763830,132768639,132770366,132773699,132776557,132778495,132778832,132782234,132783031,132783466,132783901,132785415,132785591,132787208,132788320,132789409,132789997,132792087,	complete_match	ENSMMUG00000010810	132740987	132792087	132740987	132800060	+	UBAP2L-201	UBAP2L	protein_coding	protein_coding	ENSMMUP00000038934	XM_001114022	XP_001114022	Ubiquitin-associated protein 2-like isoform b; Uncharacterized protein [Source:UniProtKB/TrEMBL;Acc:F6VRQ3]
mmu_circ_020334	chr1_13322885_13352888_F	circRNA	Yes	chr1	13322885	13352888	+	504	30003	4	0,23992,26253,29937	181,77,180,66	PREDICTED.3444.1	chr1:13300686-13322885|chr1:13352888-13358313	2	0	chr1	+	13300612	13401443	PREDICTED.3444.1	23	13300612,13322885,13346877,13349138,13352822,13358313,13359081,13359237,13359280,13366599,13366743,13367641,13369340,13370444,13373648,13383885,13384848,13387877,13388453,13389370,13389682,13389958,13396087,	13300686,13323066,13346954,13349318,13352888,13358492,13359224,13359256,13359350,13366645,13366819,13367720,13369483,13370486,13373860,13383965,13384924,13387957,13388560,13389454,13389863,13390031,13401443,	potentially_novel_isoform
mmu_circ_020335	chr1_13349138_13352888_F	circRNA	Yes	chr1	13349138	13352888	+	246	3750	2	0,3684	180,66	PREDICTED.3444.1	chr1:13346954-13349138|chr1:13352888-13358313	2	0	chr1	+	13300612	13401443	PREDICTED.3444.1	23	13300612,13322885,13346877,13349138,13352822,13358313,13359081,13359237,13359280,13366599,13366743,13367641,13369340,13370444,13373648,13383885,13384848,13387877,13388453,13389370,13389682,13389958,13396087,	13300686,13323066,13346954,13349318,13352888,13358492,13359224,13359256,13359350,13366645,13366819,13367720,13369483,13370486,13373860,13383965,13384924,13387957,13388560,13389454,13389863,13390031,13401443,	potentially_novel_isoform
mmu_circ_020342	chr1_133900333_133900646_R	ciRNA	Yes	chr1	133900333	133900646	-	313	313	1	0	313	PREDICTED.32527.1	chr1:133900308-133900646	1	1	chr1	-	133899111	134254551	PREDICTED.32527.1	32	133899111,133900646,133902154,133904442,133906778,133907066,133907641,133909867,133911131,133913669,133913884,133917546,133919625,133923085,133923354,133926067,133935948,133936221,133943667,133943889,133945421,133960416,133975410,133995848,134018268,134037013,134038413,134038521,134038659,134038695,134085443,134254020,	133900308,133900948,133902195,133904609,133906951,133907205,133907732,133909954,133911380,133913802,133913939,133917699,133919783,133923180,133923519,133926176,133936095,133936428,133943776,133943935,133945495,133960511,133975589,133996590,134018370,134038253,134038475,134038563,134038675,134041863,134085962,134254551,	potentially_novel_isoform
mmu_circ_020347	chr1_133935948_133975589_R	circRNA	Yes	chr1	133935948	133975589	-	857	39641	7	0,273,7719,7941,9473,24468,39462	147,207,109,46,74,95,179	PREDICTED.32527.1	chr1:133926176-133935948|chr1:133975589-133995848	2	0	chr1	-	133899111	134254551	PREDICTED.32527.1	32	133899111,133900646,133902154,133904442,133906778,133907066,133907641,133909867,133911131,133913669,133913884,133917546,133919625,133923085,133923354,133926067,133935948,133936221,133943667,133943889,133945421,133960416,133975410,133995848,134018268,134037013,134038413,134038521,134038659,134038695,134085443,134254020,	133900308,133900948,133902195,133904609,133906951,133907205,133907732,133909954,133911380,133913802,133913939,133917699,133919783,133923180,133923519,133926176,133936095,133936428,133943776,133943935,133945495,133960511,133975589,133996590,134018370,134038253,134038475,134038563,134038675,134041863,134085962,134254551,	potentially_novel_isoform
mmu_circ_020348	chr1_133943667_133975589_R	circRNA	Yes	chr1	133943667	133975589	-	503	31922	5	0,222,1754,16749,31743	109,46,74,95,179	PREDICTED.32527.1	chr1:133936428-133943667|chr1:133975589-133995848	2	3	chr1	-	133899111	134254551	PREDICTED.32527.1	32	133899111,133900646,133902154,133904442,133906778,133907066,133907641,133909867,133911131,133913669,133913884,133917546,133919625,133923085,133923354,133926067,133935948,133936221,133943667,133943889,133945421,133960416,133975410,133995848,134018268,134037013,134038413,134038521,134038659,134038695,134085443,134254020,	133900308,133900948,133902195,133904609,133906951,133907205,133907732,133909954,133911380,133913802,133913939,133917699,133919783,133923180,133923519,133926176,133936095,133936428,133943776,133943935,133945495,133960511,133975589,133996590,134018370,134038253,134038475,134038563,134038675,134041863,134085962,134254551,	potentially_novel_isoform
mmu_circ_020350	chr1_133975410_133996590_R	circRNA	Yes	chr1	133975410	133996590	-	921	21180	2	0,20438	179,742	PREDICTED.32527.1	chr1:133960511-133975410|chr1:133996590-134018268	3	0	chr1	-	133899111	134254551	PREDICTED.32527.1	32	133899111,133900646,133902154,133904442,133906778,133907066,133907641,133909867,133911131,133913669,133913884,133917546,133919625,133923085,133923354,133926067,133935948,133936221,133943667,133943889,133945421,133960416,133975410,133995848,134018268,134037013,134038413,134038521,134038659,134038695,134085443,134254020,	133900308,133900948,133902195,133904609,133906951,133907205,133907732,133909954,133911380,133913802,133913939,133917699,133919783,133923180,133923519,133926176,133936095,133936428,133943776,133943935,133945495,133960511,133975589,133996590,134018370,134038253,134038475,134038563,134038675,134041863,134085962,134254551,	potentially_novel_isoform
mmu_circ_020352	chr1_133995848_134085962_R	circRNA	Yes	chr1	133995848	134085962	-	5891	90114	8	0,22420,41165,42565,42673,42811,42847,89595	742,102,1240,62,42,16,3168,519	PREDICTED.10200.2	chr1:133975589-133995848|chr1:134085962-134129640	0	4	chr1	-	133898936	134129661	PREDICTED.10200.2	32	133898936,133900646,133902154,133904442,133906778,133907066,133907641,133909867,133911131,133913669,133913884,133917546,133919625,133923085,133923354,133926067,133935948,133936221,133943667,133943889,133945421,133960416,133975410,133995848,134018268,134037013,134038413,134038521,134038659,134038695,134085443,134129640,	133900308,133900948,133902195,133904609,133906951,133907205,133907732,133909954,133911380,133913802,133913939,133917699,133919783,133923180,133923519,133926176,133936095,133936428,133943776,133943935,133945495,133960511,133975589,133996590,134018370,134038253,134038475,134038563,134038675,134041863,134085962,134129661,	potentially_novel_isoform
mmu_circ_020360	chr1_13434765_13436269_F	circRNA	Yes	chr1	13434765	13436269	+	175	1504	2	0,1448	119,56	PREDICTED.3444.4	chr1:13432266-13434765|chr1:13436269-13439459	3	0	chr1	+	13371635	13475395	PREDICTED.3444.4	35	13371635,13383885,13384848,13387877,13388453,13389370,13389682,13389958,13413303,13415002,13417460,13418341,13419992,13426897,13429038,13429455,13429752,13432175,13434765,13436213,13439459,13441702,13442572,13445975,13455072,13456149,13458102,13461483,13461792,13466187,13468011,13471499,13472013,13472416,13473556,	13373860,13383965,13384924,13387957,13388560,13389454,13389863,13390031,13413397,13415151,13417639,13418479,13420241,13427016,13429124,13429585,13429915,13432266,13434884,13436269,13439568,13441769,13442657,13446081,13455187,13456283,13458164,13461629,13462032,13466259,13468133,13471649,13472206,13472535,13475395,	potentially_novel_isoform
mmu_circ_020367	chr1_134878282_134881254_R	circRNA	Yes	chr1	134878282	134881254	-	247	2972	2	0,2815	90,157	ENSMMUT00000000134	chr1:134877129-134878282|chr1:134881254-134881906	2	0	chr1	-	134851576	134887344	ENSMMUT00000000134	22	134851576,134853211,134853775,134854776,134855293,134855825,134861848,134863284,134864169,134866245,134869347,134870108,134871038,134871679,134871854,134876296,134877039,134878282,134881097,134881906,134883469,134887125,	134853026,134853350,134853850,134854867,134855453,134855885,134862007,134863460,134864245,134866421,134869947,134870246,134871247,134871748,134871980,134876375,134877129,134878372,134881254,134882030,134883568,134887344,	complete_match	ENSMMUG00000000090	134851577	134887344	134851577	134887344	-	SMG5-201	SMG5	protein_coding	protein_coding	ENSMMUP00000000123	XM_002801853	XP_002801899	Uncharacterized protein [Source:UniProtKB/TrEMBL;Acc:F6W9D7]
mmu_circ_020368	chr1_134919615_134921289_R	circRNA	Yes	chr1	134919615	134921289	-	559	1674	3	0,394,1493	132,246,181	ENSMMUT00000045699	chr1:134918353-134919615|chr1:134921289-134926140	0	2	chr1	-	134918018	134945991	ENSMMUT00000045699	14	134918018,134919615,134920009,134921108,134926140,134926387,134927513,134929573,134933813,134940123,134941622,134941777,134943055,134945841,	134918353,134919747,134920255,134921289,134926222,134926520,134927663,134929760,134933931,134940220,134941685,134941828,134943117,134945991,	complete_match	ENSMMUG00000019034	134918019	134945991	134918019	134945991	-	CCT3-201	CCT3	protein_coding	protein_coding	ENSMMUP00000038741	XM_001116562	XP_001116562	chaperonin containing TCP1, subunit 3 (gamma) [Source:HGNC Symbol;Acc:HGNC:1616]
mmu_circ_020371	chr1_13495636_13496795_F	circRNA	Yes	chr1	13495636	13496795	+	185	1159	2	0,1040	66,119	PREDICTED.2469.1	chr1:13493750-13495636|chr1:13496795-13500581	4	0	chr1	+	13491978	13512955	PREDICTED.2469.1	13	13491978,13492814,13493570,13495636,13496676,13500581,13503916,13505555,13509960,13510349,13511480,13512034,13512239,	13492313,13492890,13493750,13495702,13496795,13500651,13504051,13505745,13510091,13510483,13511580,13512157,13512955,	potentially_novel_isoform
mmu_circ_020372	chr1_135342333_135342797_F	ciRNA	Yes	chr1	135342333	135342797	+	464	464	1	0	464	ENSMMUT00000045651	chr1:135342333-135344603	0	2	chr1	+	135337249	135345837	ENSMMUT00000045651	7	135337249,135340788,135341078,135341783,135342189,135344603,135345518,	135338023,135340913,135341271,135341846,135342333,135344788,135345837,	complete_match	ENSMMUG00000000038	135337250	135345837	135337250	135345837	+	RRNAD1-201	RRNAD1	protein_coding	protein_coding	ENSMMUP00000038692			Uncharacterized protein [Source:UniProtKB/TrEMBL;Acc:F6UBA9]
mmu_circ_020376	chr1_138759468_138759638_F	ciRNA	Yes	chr1	138759468	138759638	+	170	170	1	0	170	PREDICTED.9978.3	chr1:138759468-138759667	0	2	chr1	+	138738654	138765968	PREDICTED.9978.3	21	138738654,138743804,138746852,138747175,138748015,138750438,138751541,138751869,138752156,138752979,138753299,138757579,138758241,138758531,138758936,138759344,138759667,138759998,138762720,138762973,138764350,	138738770,138743903,138746936,138747310,138748133,138750707,138751740,138751979,138752291,138753169,138753475,138757716,138758392,138758700,138759091,138759468,138759813,138760129,138762822,138763065,138765968,	potentially_novel_isoform
mmu_circ_020382	chr1_138902890_138903082_R	ciRNA	Yes	chr1	138902890	138903082	-	192	192	1	0	192	ENSMMUT00000030747	chr1:138902869-138903082	2	0	chr1	-	138897220	138906087	ENSMMUT00000030747	7	138897220,138900171,138900440,138902707,138903082,138903910,138906020,	138900002,138900216,138900617,138902869,138903168,138904076,138906087,	complete_match	ENSMMUG00000021852	138897221	138906087	138897221	138906094	-	PEX19-201	PEX19	protein_coding	protein_coding	ENSMMUP00000028775			Uncharacterized protein [Source:UniProtKB/TrEMBL;Acc:F7EI07]
mmu_circ_020391	chr1_140369947_140437366_F	circRNA	Yes	chr1	140369947	140437366	+	482	67419	5	0,1422,14642,17613,67334	114,100,68,115,85	PREDICTED.10362.2	chr1:140364946-140369947|chr1:140437366-140485900	1	1	chr1	+	140306940	140491220	PREDICTED.10362.2	14	140306940,140309053,140316715,140317698,140328241,140343928,140345370,140364814,140369947,140371369,140384589,140387560,140437281,140485900,	140307105,140309160,140316845,140317902,140328462,140344114,140345462,140364946,140370061,140371469,140384657,140387675,140437366,140491220,	complete_match
mmu_circ_020392	chr1_140371369_140387675_F	circRNA	Yes	chr1	140371369	140387675	+	283	16306	3	0,13220,16191	100,68,115	PREDICTED.10362.2	chr1:140370061-140371369|chr1:140387675-140437281	2	0	chr1	+	140306940	140491220	PREDICTED.10362.2	14	140306940,140309053,140316715,140317698,140328241,140343928,140345370,140364814,140369947,140371369,140384589,140387560,140437281,140485900,	140307105,140309160,140316845,140317902,140328462,140344114,140345462,140364946,140370061,140371469,140384657,140387675,140437366,140491220,	complete_match
mmu_circ_020393	chr1_140532601_140546136_R	circRNA	Yes	chr1	140532601	140546136	-	549	13535	3	0,11343,13271	177,108,264	ENSMMUT00000032423	chr1:140526660-140532601|chr1:140546136-140549161	3	0	chr1	-	140509443	140549743	ENSMMUT00000032423	8	140509443,140511051,140524177,140526434,140532601,140543944,140545872,140549161,	140510523,140511228,140524711,140526660,140532778,140544052,140546136,140549743,	complete_match	ENSMMUG00000023042	140509444	140549743	140509444	140549743	-	OLFML2B-201	OLFML2B	protein_coding	protein_coding	ENSMMUP00000030337	XM_001118163	XP_001118163	Uncharacterized protein [Source:UniProtKB/TrEMBL;Acc:F6V8S1]
mmu_circ_020401	chr1_142033990_142037862_R	circRNA	Yes	chr1	142033990	142037862	-	513	3872	4	0,2321,2833,3704	112,130,103,168	ENSMMUT00000023723	chr1:142030883-142033990|chr1:142037862-142045702	2	0	chr1	-	142026224	142170548	ENSMMUT00000023723	80	142026224,142030840,142033990,142036311,142036823,142037694,142045702,142046353,142046714,142047079,142047345,142047862,142048899,142049553,142049782,142050532,142050789,142051629,142052047,142052598,142052982,142053351,142054099,142054566,142054945,142059476,142060843,142064013,142065096,142065517,142066386,142067270,142073777,142074038,142074946,142075806,142076170,142076618,142088430,142089059…	142027408,142030883,142034102,142036441,142036926,142037862,142045816,142046531,142046873,142047244,142047462,142048019,142049073,142049636,142049983,142050672,142050912,142051700,142052108,142052817,142053081,142053384,142054297,142054691,142055024,142059755,142061714,142064388,142065377,142065805,142066662,142067543,142073853,142074235,142075219,142076079,142076437,142076885,142088694,142089323…	complete_match	ENSMMUG00000023096	142026225	142170548	142026222	142174232	-	OBSCN-202	OBSCN	protein_coding	protein_coding	ENSMMUP00000022201			Uncharacterized protein [Source:UniProtKB/TrEMBL;Acc:F6URJ9]
mmu_circ_020403	chr1_142054322_142054566_R	ciRNA	Yes	chr1	142054322	142054566	-	244	244	1	0	244	ENSMMUT00000023723	chr1:142054297-142054566	0	2	chr1	-	142026224	142170548	ENSMMUT00000023723	80	142026224,142030840,142033990,142036311,142036823,142037694,142045702,142046353,142046714,142047079,142047345,142047862,142048899,142049553,142049782,142050532,142050789,142051629,142052047,142052598,142052982,142053351,142054099,142054566,142054945,142059476,142060843,142064013,142065096,142065517,142066386,142067270,142073777,142074038,142074946,142075806,142076170,142076618,142088430,142089059…	142027408,142030883,142034102,142036441,142036926,142037862,142045816,142046531,142046873,142047244,142047462,142048019,142049073,142049636,142049983,142050672,142050912,142051700,142052108,142052817,142053081,142053384,142054297,142054691,142055024,142059755,142061714,142064388,142065377,142065805,142066662,142067543,142073853,142074235,142075219,142076079,142076437,142076885,142088694,142089323…	complete_match	ENSMMUG00000023096	142026225	142170548	142026222	142174232	-	OBSCN-202	OBSCN	protein_coding	protein_coding	ENSMMUP00000022201			Uncharacterized protein [Source:UniProtKB/TrEMBL;Acc:F6URJ9]
mmu_circ_020405	chr1_142094820_142095087_R	ciRNA	Yes	chr1	142094820	142095087	-	267	267	1	0	267	ENSMMUT00000023723	chr1:142094784-142095087	2	0	chr1	-	142026224	142170548	ENSMMUT00000023723	80	142026224,142030840,142033990,142036311,142036823,142037694,142045702,142046353,142046714,142047079,142047345,142047862,142048899,142049553,142049782,142050532,142050789,142051629,142052047,142052598,142052982,142053351,142054099,142054566,142054945,142059476,142060843,142064013,142065096,142065517,142066386,142067270,142073777,142074038,142074946,142075806,142076170,142076618,142088430,142089059…	142027408,142030883,142034102,142036441,142036926,142037862,142045816,142046531,142046873,142047244,142047462,142048019,142049073,142049636,142049983,142050672,142050912,142051700,142052108,142052817,142053081,142053384,142054297,142054691,142055024,142059755,142061714,142064388,142065377,142065805,142066662,142067543,142073853,142074235,142075219,142076079,142076437,142076885,142088694,142089323…	complete_match	ENSMMUG00000023096	142026225	142170548	142026222	142174232	-	OBSCN-202	OBSCN	protein_coding	protein_coding	ENSMMUP00000022201			Uncharacterized protein [Source:UniProtKB/TrEMBL;Acc:F6URJ9]
mmu_circ_020407	chr1_142106415_142106587_R	ciRNA	Yes	chr1	142106415	142106587	-	172	172	1	0	172	ENSMMUT00000023723	chr1:142106374-142106587	2	0	chr1	-	142026224	142170548	ENSMMUT00000023723	80	142026224,142030840,142033990,142036311,142036823,142037694,142045702,142046353,142046714,142047079,142047345,142047862,142048899,142049553,142049782,142050532,142050789,142051629,142052047,142052598,142052982,142053351,142054099,142054566,142054945,142059476,142060843,142064013,142065096,142065517,142066386,142067270,142073777,142074038,142074946,142075806,142076170,142076618,142088430,142089059…	142027408,142030883,142034102,142036441,142036926,142037862,142045816,142046531,142046873,142047244,142047462,142048019,142049073,142049636,142049983,142050672,142050912,142051700,142052108,142052817,142053081,142053384,142054297,142054691,142055024,142059755,142061714,142064388,142065377,142065805,142066662,142067543,142073853,142074235,142075219,142076079,142076437,142076885,142088694,142089323…	complete_match	ENSMMUG00000023096	142026225	142170548	142026222	142174232	-	OBSCN-202	OBSCN	protein_coding	protein_coding	ENSMMUP00000022201			Uncharacterized protein [Source:UniProtKB/TrEMBL;Acc:F6URJ9]
mmu_circ_020409	chr1_142136117_142137479_R	circRNA	Yes	chr1	142136117	142137479	-	552	1362	2	0,1086	276,276	ENSMMUT00000023723	chr1:142125764-142136117|chr1:142137479-142138316	1	2	chr1	-	142026224	142170548	ENSMMUT00000023723	80	142026224,142030840,142033990,142036311,142036823,142037694,142045702,142046353,142046714,142047079,142047345,142047862,142048899,142049553,142049782,142050532,142050789,142051629,142052047,142052598,142052982,142053351,142054099,142054566,142054945,142059476,142060843,142064013,142065096,142065517,142066386,142067270,142073777,142074038,142074946,142075806,142076170,142076618,142088430,142089059…	142027408,142030883,142034102,142036441,142036926,142037862,142045816,142046531,142046873,142047244,142047462,142048019,142049073,142049636,142049983,142050672,142050912,142051700,142052108,142052817,142053081,142053384,142054297,142054691,142055024,142059755,142061714,142064388,142065377,142065805,142066662,142067543,142073853,142074235,142075219,142076079,142076437,142076885,142088694,142089323…	complete_match	ENSMMUG00000023096	142026225	142170548	142026222	142174232	-	OBSCN-202	OBSCN	protein_coding	protein_coding	ENSMMUP00000022201			Uncharacterized protein [Source:UniProtKB/TrEMBL;Acc:F6URJ9]
mmu_circ_020410	chr1_142659057_142661582_F	circRNA	Yes	chr1	142659057	142661582	+	327	2525	3	0,1832,2442	83,161,83	PREDICTED.8318.2	chr1:142654681-142659057|chr1:142661582-142668788	0	11	chr1	+	142654658	142670923	PREDICTED.8318.2	11	142654658,142659057,142660889,142661499,142668788,142669565,142669782,142670144,142670349,142670483,142670761,	142654681,142659140,142661050,142661582,142668793,142669607,142670062,142670265,142670399,142670749,142670923,	potentially_novel_isoform
mmu_circ_020413	chr1_143165362_143231149_F	circRNA	Yes	chr1	143165362	143231149	+	1120	65787	8	0,10496,16242,44270,57677,59499,62325,65620	84,96,149,94,201,249,80,167	PREDICTED.30331.1	chr1:143113998-143165362|chr1:143231149-143239538	2	0	chr1	+	143055275	143324244	PREDICTED.30331.1	23	143055275,143113906,143165362,143175858,143181604,143209632,143223039,143224861,143227687,143230982,143239538,143248771,143255392,143255887,143263927,143272959,143282226,143288905,143289576,143291314,143293793,143315297,143323381,	143056238,143113998,143165446,143175954,143181753,143209726,143223240,143225110,143227767,143231149,143239661,143248905,143255635,143255998,143264175,143273065,143282351,143289011,143289725,143291406,143293870,143315381,143324244,	potentially_novel_isoform
mmu_circ_020415	chr1_143209632_143248905_F	circRNA	Yes	chr1	143209632	143248905	+	1048	39273	7	0,13407,15229,18055,21350,29906,39139	94,201,249,80,167,123,134	PREDICTED.8672.1	chr1:143181753-143209632|chr1:143248905-143255392	0	2	chr1	+	143055276	143377901	PREDICTED.8672.1	36	143055276,143113906,143165362,143175858,143181604,143209632,143223039,143224861,143227687,143230982,143239538,143248771,143255392,143255887,143263927,143272959,143282226,143288905,143289576,143291314,143293793,143315297,143323381,143327726,143328543,143335954,143338170,143339206,143340656,143343762,143346616,143352880,143353695,143364658,143374993,143375571,	143056238,143113998,143165446,143175954,143181753,143209726,143223240,143225110,143227767,143231149,143239661,143248905,143255635,143255998,143264175,143273065,143282351,143289011,143289725,143291406,143293870,143315381,143323487,143327863,143328683,143336036,143338387,143339269,143341250,143343860,143346701,143353004,143353813,143364776,143375151,143377901,	potentially_novel_isoform
mmu_circ_020416	chr1_143230982_143231149_F	circRNA	Yes	chr1	143230982	143231149	+	167	167	1	0	167	PREDICTED.30331.1	chr1:143227767-143230982|chr1:143231149-143239538	1	2	chr1	+	143055275	143324244	PREDICTED.30331.1	23	143055275,143113906,143165362,143175858,143181604,143209632,143223039,143224861,143227687,143230982,143239538,143248771,143255392,143255887,143263927,143272959,143282226,143288905,143289576,143291314,143293793,143315297,143323381,	143056238,143113998,143165446,143175954,143181753,143209726,143223240,143225110,143227767,143231149,143239661,143248905,143255635,143255998,143264175,143273065,143282351,143289011,143289725,143291406,143293870,143315381,143324244,	potentially_novel_isoform
mmu_circ_020418	chr1_143239538_143255998_F	circRNA	Yes	chr1	143239538	143255998	+	611	16460	4	0,9233,15854,16349	123,134,243,111	PREDICTED.30331.1	chr1:143231149-143239538|chr1:143255998-143263927	2	0	chr1	+	143055275	143324244	PREDICTED.30331.1	23	143055275,143113906,143165362,143175858,143181604,143209632,143223039,143224861,143227687,143230982,143239538,143248771,143255392,143255887,143263927,143272959,143282226,143288905,143289576,143291314,143293793,143315297,143323381,	143056238,143113998,143165446,143175954,143181753,143209726,143223240,143225110,143227767,143231149,143239661,143248905,143255635,143255998,143264175,143273065,143282351,143289011,143289725,143291406,143293870,143315381,143324244,	potentially_novel_isoform
mmu_circ_020420	chr1_143288905_143323487_F	circRNA	Yes	chr1	143288905	143323487	+	614	34582	6	0,671,2409,4888,26392,34476	106,149,92,77,84,106	PREDICTED.8672.1	chr1:143282351-143288905|chr1:143323487-143327726	0	2	chr1	+	143055276	143377901	PREDICTED.8672.1	36	143055276,143113906,143165362,143175858,143181604,143209632,143223039,143224861,143227687,143230982,143239538,143248771,143255392,143255887,143263927,143272959,143282226,143288905,143289576,143291314,143293793,143315297,143323381,143327726,143328543,143335954,143338170,143339206,143340656,143343762,143346616,143352880,143353695,143364658,143374993,143375571,	143056238,143113998,143165446,143175954,143181753,143209726,143223240,143225110,143227767,143231149,143239661,143248905,143255635,143255998,143264175,143273065,143282351,143289011,143289725,143291406,143293870,143315381,143323487,143327863,143328683,143336036,143338387,143339269,143341250,143343860,143346701,143353004,143353813,143364776,143375151,143377901,	potentially_novel_isoform
mmu_circ_020427	chr1_144225359_144238144_F	circRNA	Yes	chr1	144225359	144238144	+	662	12785	4	0,3530,7273,12598	141,159,175,187	PREDICTED.29592.2	chr1:144224452-144225359|chr1:144238144-144240185	2	0	chr1	+	144201533	144250822	PREDICTED.29592.2	8	144201533,144224310,144225359,144228889,144232632,144237957,144240185,144246144,	144201874,144224452,144225500,144229048,144232807,144238144,144240470,144250822,	complete_match
mmu_circ_020442	chr1_147267412_147276841_R	circRNA	Yes	chr1	147267412	147276841	-	380	9429	4	0,464,1363,9399	98,128,124,30	ENSMMUT00000008224	chr1:147264619-147267412|chr1:147276841-147314426	2	0	chr1	-	147253211	147328911	ENSMMUT00000008224	8	147253211,147264521,147267412,147267876,147268775,147276811,147314426,147328781,	147256796,147264619,147267510,147268004,147268899,147276841,147314952,147328911,	complete_match	ENSMMUG00000005873	147253212	147328911	147253212	147328911	-	DISP1-201	DISP1	protein_coding	protein_coding	ENSMMUP00000007730	XM_001099799	XP_001099799	Uncharacterized protein [Source:UniProtKB/TrEMBL;Acc:F6TLW0]
mmu_circ_020443	chr1_147540889_147545648_R	circRNA	Yes	chr1	147540889	147545648	-	515	4759	5	0,474,1357,2945,4653	151,82,86,90,106	PREDICTED.30426.1	chr1:147539707-147540889|chr1:147545648-147546944	2	0	chr1	-	147537455	147547255	PREDICTED.30426.1	8	147537455,147539547,147540889,147541363,147542246,147543834,147545542,147546944,	147538600,147539707,147541040,147541445,147542332,147543924,147545648,147547255,	potentially_novel_isoform
mmu_circ_020444	chr1_14755020_14755707_F	circRNA	Yes	chr1	14755020	14755707	+	234	687	2	0,551	98,136	ENSMMUT00000047576	chr1:14752054-14755020|chr1:14755707-14758004	0	2	chr1	+	14750333	14759159	ENSMMUT00000047576	5	14750333,14751746,14755020,14755571,14758004,	14750528,14752054,14755118,14755707,14759159,	complete_match	ENSMMUG00000032251	14750334	14759159	14750334	14759159	+	FBXO44-201	FBXO44	protein_coding	protein_coding	ENSMMUP00000040606			F-box only protein 44 isoform 1; Uncharacterized protein [Source:UniProtKB/TrEMBL;Acc:F7BAM9]
mmu_circ_020446	chr1_147716500_147719236_F	circRNA	Yes	chr1	147716500	147719236	+	346	2736	3	0,804,2581	67,124,155	PREDICTED.30484.1	chr1:147711157-147716500|chr1:147719236-147721763	2	0	chr1	+	147690769	147721922	PREDICTED.30484.1	14	147690769,147691960,147696234,147700657,147700925,147703260,147703441,147703487,147710034,147710998,147716500,147717304,147719081,147721763,	147690799,147692080,147696404,147700788,147700976,147703395,147703453,147703495,147710138,147711157,147716567,147717428,147719236,147721922,	potentially_novel_isoform
mmu_circ_020448	chr1_149717550_149736920_R	circRNA	Yes	chr1	149717550	149736920	-	529	19370	6	0,209,2738,17604,19203,19321	120,237,57,51,15,49	PREDICTED.30994.1	chr1:149703728-149717550|chr1:149736920-149753867	3	0	chr1	-	149670719	149813548	PREDICTED.30994.1	17	149670719,149677216,149681685,149682920,149684362,149698735,149702457,149703628,149717550,149717759,149720288,149735154,149736753,149736871,149753867,149755445,149812903,	149672895,149677261,149681937,149683085,149684463,149699387,149702570,149703728,149717670,149717996,149720345,149735205,149736768,149736920,149753921,149755649,149813548,	potentially_novel_isoform
mmu_circ_020466	chr1_15426623_15427095_F	circRNA	Yes	chr1	15426623	15427095	+	285	472	2	0,359	172,113	PREDICTED.3567.1	chr1:15423855-15426623|chr1:15427095-15429280	2	0	chr1	+	15359903	15481372	PREDICTED.3567.1	48	15359903,15360211,15364722,15368621,15370727,15371359,15372308,15374737,15374993,15375943,15381024,15381980,15382821,15385095,15387102,15389891,15393562,15397119,15403041,15405540,15408125,15414200,15419431,15423644,15426623,15426982,15429280,15433204,15434629,15436968,15438887,15439999,15444557,15446719,15450327,15452790,15458848,15459962,15462408,15463613,15465867,15466209,15471032,15474150,154…	15360111,15360292,15364839,15368726,15370898,15371460,15372477,15374839,15375195,15376123,15381155,15382056,15382992,15385226,15387235,15392105,15393714,15398151,15403132,15405667,15408306,15414383,15419654,15423855,15426795,15427095,15429493,15433470,15434763,15437124,15439098,15440074,15444764,15446809,15450468,15452913,15458951,15460115,15462544,15463661,15466018,15466420,15471280,15474342,154…	potentially_novel_isoform
mmu_circ_020470	chr1_15571783_15622853_F	circRNA	Yes	chr1	15571783	15622853	+	702	51070	4	0,4160,41161,50829	133,196,132,241	PREDICTED.3593.1	chr1:15533779-15571783|chr1:15622853-15624692	2	0	chr1	+	15491971	15627399	PREDICTED.3593.1	16	15491971,15496822,15497876,15500849,15503112,15504035,15517103,15518536,15520836,15532046,15533611,15571783,15575943,15612944,15622612,15624692,	15492263,15496986,15497985,15501029,15503226,15504185,15517253,15518633,15520985,15532181,15533779,15571916,15576139,15613076,15622853,15627399,	potentially_novel_isoform
mmu_circ_020471	chr1_155990548_155990876_F	circRNA	Yes	chr1	155990548	155990876	+	328	328	1	0	328	PREDICTED.32869.1	chr1:155904731-155990548|chr1:155990876-156003663	2	0	chr1	+	155904157	156100511	PREDICTED.32869.1	19	155904157,155990548,156003663,156041566,156044513,156053919,156055073,156059706,156062692,156063944,156066668,156070782,156072842,156079509,156081168,156084757,156087626,156092209,156098895,	155904731,155990876,156003833,156041664,156044581,156053990,156055161,156059795,156062780,156064027,156066726,156070861,156074320,156079653,156081387,156084886,156087861,156092373,156100511,	complete_match
mmu_circ_020473	chr1_156128271_156137797_R	circRNA	Yes	chr1	156128271	156137797	-	365	9526	4	0,5738,6581,9415	68,125,61,111	PREDICTED.32263.2	chr1:156125389-156128271|chr1:156137797-156147379	2	0	chr1	-	156116189	156149065	PREDICTED.32263.2	12	156116189,156118632,156120811,156121918,156122711,156125286,156128271,156134009,156134852,156137686,156147379,156148874,	156116615,156118741,156120986,156122039,156122822,156125389,156128339,156134134,156134913,156137797,156147443,156149065,	potentially_novel_isoform
mmu_circ_020474	chr1_156442292_156457569_R	circRNA	Yes	chr1	156442292	156457569	-	2095	15277	3	0,6438,13485	195,108,1792	PREDICTED.32376.1	chr1:156418285-156442292|chr1:156457569-156465316	23	0	chr1	-	156412865	156465353	PREDICTED.32376.1	5	156412865,156442292,156448730,156455777,156465316,	156418285,156442487,156448838,156457569,156465353,	potentially_novel_isoform
mmu_circ_020476	chr1_157274701_157319561_R	circRNA	Yes	chr1	157274701	157319561	-	572	44860	3	0,8532,44497	93,116,363	PREDICTED.32771.1	chr1:157226514-157274701|chr1:157319561-157331956	2	0	chr1	-	157213295	157388629	PREDICTED.32771.1	13	157213295,157213972,157215158,157224767,157226466,157274701,157283233,157319198,157331956,157342300,157369703,157376208,157388505,	157213701,157215153,157215572,157224900,157226514,157274794,157283349,157319561,157332050,157342416,157369824,157376244,157388629,	potentially_novel_isoform
mmu_circ_020477	chr1_157369703_157376244_R	circRNA	Yes	chr1	157369703	157376244	-	157	6541	2	0,6505	121,36	ENSMMUT00000007336	chr1:157342416-157369703|chr1:157376244-157395588	0	4	chr1	-	157213601	157395693	ENSMMUT00000007336	13	157213601,157213972,157215158,157224767,157226466,157274701,157283233,157319198,157331956,157342300,157369703,157376208,157395588,	157213701,157215153,157215572,157224900,157226514,157274794,157283349,157319561,157332050,157342416,157369824,157376244,157395693,	complete_match	ENSMMUG00000005210	157213602	157395693	157213602	157395693	-	RPS6KC1-201	RPS6KC1	protein_coding	protein_coding	ENSMMUP00000006894	XM_002808253	XP_002808299	ribosomal protein S6 kinase, 52kDa, polypeptide 1 [Source:HGNC Symbol;Acc:HGNC:10439]
mmu_circ_020478	chr1_157475852_157476461_R	circRNA	Yes	chr1	157475852	157476461	-	132	609	2	0,552	75,57	PREDICTED.32494.6	chr1:157469813-157475852|chr1:157476461-157481535	4	0	chr1	-	157469373	157491937	PREDICTED.32494.6	6	157469373,157475852,157476404,157481535,157490763,157491834,	157469813,157475927,157476461,157481624,157491237,157491937,	potentially_novel_isoform
mmu_circ_020481	chr1_158393456_158402571_F	circRNA	Yes	chr1	158393456	158402571	+	508	9115	4	0,4363,8304,8992	138,47,200,123	PREDICTED.33037.3	chr1:158390363-158393456|chr1:158402571-158419543	1	1	chr1	+	158375212	158458190	PREDICTED.33037.3	15	158375212,158389268,158390216,158393456,158397819,158401760,158402448,158419543,158424778,158426382,158429106,158430882,158432233,158441874,158457414,	158375456,158389398,158390363,158393594,158397866,158401960,158402571,158419661,158424913,158426480,158429346,158431020,158432440,158442069,158458190,	potentially_novel_isoform
mmu_circ_020482	chr1_158419543_158426480_F	circRNA	Yes	chr1	158419543	158426480	+	351	6937	3	0,5235,6839	118,135,98	PREDICTED.33037.3	chr1:158402571-158419543|chr1:158426480-158429106	11	0	chr1	+	158375212	158458190	PREDICTED.33037.3	15	158375212,158389268,158390216,158393456,158397819,158401760,158402448,158419543,158424778,158426382,158429106,158430882,158432233,158441874,158457414,	158375456,158389398,158390363,158393594,158397866,158401960,158402571,158419661,158424913,158426480,158429346,158431020,158432440,158442069,158458190,	potentially_novel_isoform
mmu_circ_020484	chr1_158622694_158626866_F	circRNA	Yes	chr1	158622694	158626866	+	370	4172	2	0,3898	96,274	PREDICTED.33116.2	chr1:158616728-158622694|chr1:158626866-158630997	3	0	chr1	+	158574192	158669018	PREDICTED.33116.2	8	158574192,158574948,158616609,158622694,158626592,158630997,158661538,158662573,	158574823,158575213,158616728,158622790,158626866,158631124,158661645,158669018,	complete_match
mmu_circ_020487	chr1_162590801_162599460_R	circRNA	Yes	chr1	162590801	162599460	-	181	8659	4	0,577,2363,8617	64,36,39,42	ENSMMUT00000009949	chr1:162582993-162590801|chr1:162599460-162602772	2	0	chr1	-	162582920	162618538	ENSMMUT00000009949	11	162582920,162590801,162591378,162593164,162599418,162602772,162608574,162610256,162612645,162613151,162618441,	162582993,162590865,162591414,162593203,162599460,162602955,162608772,162610342,162612748,162613340,162618538,	complete_match	ENSMMUG00000007129	162582921	162618538	162582921	162725844	-	CD46-204	CD46	protein_coding	protein_coding	ENSMMUP00000009338	XM_001111698	XP_001111698	Uncharacterized protein [Source:UniProtKB/TrEMBL;Acc:F7DT48]
mmu_circ_020488	chr1_162599418_162613340_R	circRNA	Yes	chr1	162599418	162613340	-	801	13922	6	0,3354,9156,10838,13227,13733	42,183,198,86,103,189	ENSMMUT00000009949	chr1:162593203-162599418|chr1:162613340-162618441	2	0	chr1	-	162582920	162618538	ENSMMUT00000009949	11	162582920,162590801,162591378,162593164,162599418,162602772,162608574,162610256,162612645,162613151,162618441,	162582993,162590865,162591414,162593203,162599460,162602955,162608772,162610342,162612748,162613340,162618538,	complete_match	ENSMMUG00000007129	162582921	162618538	162582921	162725844	-	CD46-204	CD46	protein_coding	protein_coding	ENSMMUP00000009338	XM_001111698	XP_001111698	Uncharacterized protein [Source:UniProtKB/TrEMBL;Acc:F7DT48]
mmu_circ_020489	chr1_163033468_163034689_R	circRNA	Yes	chr1	163033468	163034689	-	186	1221	2	0,1121	86,100	PREDICTED.10152.1	chr1:163029202-163033468|chr1:163034689-163035567	0	2	chr1	-	163000929	163038268	PREDICTED.10152.1	8	163000929,163021049,163023082,163023772,163033468,163034589,163035567,163037557,	163002165,163021070,163023163,163029202,163033554,163034689,163035755,163038268,	potentially_novel_isoform
mmu_circ_020491	chr1_16365511_16387333_F	circRNA	Yes	chr1	16365511	16387333	+	502	21822	4	0,1807,13789,21695	118,104,153,127	PREDICTED.1006.1	chr1:16353777-16365511|chr1:16387333-16407953	0	2	chr1	+	16343757	16426559	PREDICTED.1006.1	9	16343757,16353703,16365511,16367318,16379300,16387206,16407953,16411873,16420017,	16344206,16353777,16365629,16367422,16379453,16387333,16408009,16411984,16426559,	potentially_novel_isoform
mmu_circ_020496	chr1_163968395_163969376_R	circRNA	Yes	chr1	163968395	163969376	-	345	981	2	0,765	129,216	ENSMMUT00000031823	chr1:163960907-163968395|chr1:163969376-163977328	3	0	chr1	-	163898025	164144916	ENSMMUT00000031823	23	163898025,163903511,163907422,163909061,163911930,163916086,163922212,163924193,163925258,163932097,163940703,163942543,163946093,163955530,163955686,163956978,163960682,163968395,163969160,163977328,164017859,164049543,164144787,	163901404,163903836,163907569,163909242,163912010,163916311,163922318,163924328,163925336,163932158,163940728,163942571,163946157,163955551,163955884,163957080,163960907,163968524,163969376,163977391,164018022,164049736,164144916,	complete_match	ENSMMUG00000022614	163898026	164144916	163898026	164144916	-	SRGAP2-201	SRGAP2	protein_coding	protein_coding	ENSMMUP00000029774	XM_001089021	XP_002801998	SLIT-ROBO Rho GTPase activating protein 2 [Source:HGNC Symbol;Acc:HGNC:19751]
mmu_circ_020501	chr1_166577701_166578921_R	circRNA	Yes	chr1	166577701	166578921	-	581	1220	2	0,716	77,504	PREDICTED.35149.1	chr1:166576540-166577701|chr1:166578921-166583982	1	1	chr1	-	166570748	166630009	PREDICTED.35149.1	18	166570748,166575138,166575571,166576224,166577701,166578417,166583982,166586885,166591353,166593733,166595257,166595568,166595810,166597022,166607483,166609043,166622998,166627015,	166574140,166575206,166575738,166576540,166577778,166578921,166584051,166586984,166591416,166593844,166595338,166595685,166596014,166597146,166607603,166609241,166626724,166630009,	potentially_novel_isoform
mmu_circ_020506	chr1_166703523_166705671_R	circRNA	Yes	chr1	166703523	166705671	-	618	2148	3	0,1282,1956	212,214,192	PREDICTED.10135.1	chr1:166702320-166703523|chr1:166705671-166708468	0	2	chr1	-	166683221	166796852	PREDICTED.10135.1	21	166683221,166698958,166702212,166703523,166704805,166705479,166708468,166709485,166710576,166711605,166713159,166714640,166715515,166718924,166720658,166721809,166722407,166723020,166724378,166739360,166796272,	166687611,166699135,166702320,166703735,166705019,166705671,166708575,166709573,166710756,166711837,166713401,166714883,166715730,166719086,166720694,166721935,166722533,166723278,166724576,166740021,166796852,	potentially_novel_isoform
mmu_circ_020507	chr1_167531537_167532200_F	circRNA	Yes	chr1	167531537	167532200	+	186	663	2	0,563	86,100	ENSMMUT00000009844	chr1:167530657-167531537|chr1:167532200-167532566	1	1	chr1	+	167527996	167533383	ENSMMUT00000009844	9	167527996,167528377,167528675,167529282,167529763,167530573,167531537,167532100,167532566,	167528085,167528527,167528748,167529389,167529893,167530657,167531623,167532200,167533383,	complete_match	ENSMMUG00000007047	167527997	167533383	167527997	167533383	+	CYB5R1-201	CYB5R1	protein_coding	protein_coding	ENSMMUP00000009243	XM_001105252	XP_001105252	NADH-cytochrome b5 reductase 1; Uncharacterized protein [Source:UniProtKB/TrEMBL;Acc:F7F187]
mmu_circ_020512	chr1_167765131_167765669_F	ciRNA	Yes	chr1	167765131	167765669	+	538	538	1	0	538	ENSMMUT00000021355	chr1:167765131-167765693	0	2	chr1	+	167696185	167777356	ENSMMUT00000021355	30	167696185,167727554,167729907,167731517,167736967,167738792,167740365,167742876,167744938,167747251,167748320,167750854,167754234,167756187,167759866,167760214,167763677,167763982,167764775,167765693,167768814,167769622,167771626,167773878,167774032,167774247,167774463,167775117,167776364,167777218,	167696343,167727632,167730030,167731688,167737102,167738889,167740475,167743035,167745058,167747410,167748502,167751017,167754354,167756382,167760048,167760339,167763828,167764097,167765131,167765832,167768994,167769781,167772112,167774009,167774039,167774280,167774484,167775189,167776685,167777356,	complete_match	ENSMMUG00000015233	167696186	167777356	167696186	167777356	+	KDM5B-202	KDM5B	protein_coding	protein_coding	ENSMMUP00000019971		XP_002808303	lysine (K)-specific demethylase 5B [Source:HGNC Symbol;Acc:HGNC:18039]
mmu_circ_020519	chr1_168521868_168527823_R	circRNA	Yes	chr1	168521868	168527823	-	193	5955	2	0,5891	129,64	ENSMMUT00000002722	chr1:168520510-168521868|chr1:168527823-168528277	0	2	chr1	-	168515334	168530155	ENSMMUT00000002722	6	168515334,168520399,168521868,168527759,168528277,168530122,	168516541,168520510,168521997,168527823,168528377,168530155,	complete_match	ENSMMUG00000001924	168515335	168530155	168515335	168530175	-	TIMM17A-201	TIMM17A	protein_coding	protein_coding	ENSMMUP00000002573	XM_001108034	XP_001108034	Mitochondrial import inner membrane translocase subunit Tim17-A; Uncharacterized protein [Source:UniProtKB/TrEMBL;Acc:F6TZ17]
mmu_circ_020522	chr1_168712043_168713738_R	circRNA	Yes	chr1	168712043	168713738	-	1141	1695	2	0,1001	447,694	ENSMMUT00000002705	chr1:168710893-168712043|chr1:168713738-168714593	2	0	chr1	-	168675487	168844981	ENSMMUT00000002705	32	168675487,168678239,168681689,168682283,168682961,168683178,168684177,168684827,168685395,168685671,168686060,168686320,168686781,168687051,168687138,168701472,168701524,168701637,168702347,168705451,168705640,168706427,168707583,168709642,168710851,168712043,168713044,168714593,168715345,168776158,168781984,168844224,	168676142,168678437,168681808,168682480,168683033,168683333,168684413,168684987,168685491,168685769,168686229,168686513,168686978,168687086,168687176,168701499,168701555,168701749,168702431,168705529,168705664,168706480,168707754,168709791,168710893,168712490,168713738,168714891,168715484,168776524,168782087,168844981,	complete_match	ENSMMUG00000001908	168675488	168844981	168675488	168844981	-	NAV1-201	NAV1	protein_coding	protein_coding	ENSMMUP00000002557			neuron navigator 1 [Source:HGNC Symbol;Acc:HGNC:15989]
mmu_circ_020527	chr1_169400045_169406568_F	circRNA	Yes	chr1	169400045	169406568	+	609	6523	4	0,2346,4811,6377	153,253,57,146	PREDICTED.36635.2	chr1:169399867-169400045|chr1:169406568-169407019	2	0	chr1	+	169378730	169444886	PREDICTED.36635.2	35	169378730,169380973,169397473,169399724,169400045,169402391,169404856,169406422,169407019,169408723,169414215,169415186,169417046,169418038,169419305,169421087,169421279,169422532,169423368,169423774,169426121,169426798,169427168,169430491,169431326,169431948,169432600,169434501,169435276,169439473,169440312,169440624,169441248,169443222,169444732,	169379101,169381079,169397613,169399867,169400198,169402644,169404913,169406568,169407101,169408884,169414441,169415394,169417167,169418153,169419399,169421113,169421300,169422700,169423498,169423834,169426228,169426886,169427276,169430544,169431473,169432150,169432783,169434585,169435360,169439530,169440441,169440690,169441413,169443416,169444886,	potentially_novel_isoform
mmu_circ_020532	chr1_169493546_169493939_F	ciRNA	Yes	chr1	169493546	169493939	+	393	393	1	0	393	ENSMMUT00000008286	chr1:169493546-169493961	2	0	chr1	+	169470468	169519927	ENSMMUT00000008286	37	169470468,169484301,169484841,169487765,169488017,169488526,169489004,169489678,169491107,169492638,169492815,169493464,169493961,169496151,169496353,169496766,169497028,169500964,169501622,169502209,169502635,169503025,169503314,169504454,169504842,169505032,169506172,169506455,169509108,169510986,169512967,169514341,169516658,169517141,169518375,169519112,169519827,	169470509,169484524,169485024,169487915,169488152,169488694,169489120,169489874,169491297,169492702,169493034,169493546,169494083,169496228,169496412,169496818,169497228,169501072,169501691,169502442,169502783,169503220,169503416,169504620,169504894,169505090,169506378,169506530,169509222,169511025,169513104,169514522,169516823,169517259,169518546,169519312,169519927,	complete_match	ENSMMUG00000005921	169470469	169519927	169470469	169519927	+	KIF21B-201	KIF21B	protein_coding	protein_coding	ENSMMUP00000007788			kinesin family member 21B [Source:HGNC Symbol;Acc:HGNC:29442]
mmu_circ_020539	chr1_1699675_1700023_F	ciRNA	Yes	chr1	1699675	1700023	+	348	348	1	0	348	ENSMMUT00000001636	chr1:1699675-1700050	0	2	chr1	+	1688793	1703306	ENSMMUT00000001636	6	1688793,1688981,1692736,1698210,1699512,1700050,	1688889,1689081,1692766,1698325,1699675,1703306,	complete_match	ENSMMUG00000001160	1688794	1703306	1688710	1703306	+	MXD4-202	MXD4	protein_coding	protein_coding	ENSMMUP00000001540	XM_001118504	XP_001118504	MAX dimerization protein 4 [Source:HGNC Symbol;Acc:HGNC:13906]
mmu_circ_020540	chr1_170090785_170090984_F	ciRNA	Yes	chr1	170090785	170090984	+	199	199	1	0	199	PREDICTED.10322.3	chr1:170090785-170091011	0	2	chr1	+	170090674	170096207	PREDICTED.10322.3	2	170090674,170091011,	170090785,170096207,	complete_match
mmu_circ_020542	chr1_172264704_172289008_R	circRNA	Yes	chr1	172264704	172289008	-	400	24304	4	0,1572,12713,24219	111,63,141,85	PREDICTED.36072.2	chr1:172251139-172264704|chr1:172289008-172357972	1	1	chr1	-	172213032	172358184	PREDICTED.36072.2	10	172213032,172231473,172235667,172250040,172251030,172264704,172266276,172277417,172288923,172357972,	172215317,172231587,172235762,172250148,172251139,172264815,172266339,172277558,172289008,172358184,	complete_match
mmu_circ_020543	chr1_172856678_172887715_F	circRNA	Yes	chr1	172856678	172887715	+	546	31037	7	0,2026,15737,21457,26660,28030,30926	50,120,70,81,60,54,111	ENSMMUT00000008905	chr1:172804541-172856678|chr1:172887715-172910913	2	0	chr1	+	172745029	172950523	ENSMMUT00000008905	14	172745029,172804497,172856678,172858704,172872415,172878135,172883338,172884708,172887604,172910913,172916644,172921281,172933148,172950421,	172745096,172804541,172856728,172858824,172872485,172878216,172883398,172884762,172887715,172911014,172916690,172921383,172933274,172950523,	complete_match	ENSMMUG00000013962	172745030	172950523	172742664	172950523	+	DENND1B-202	DENND1B	protein_coding	protein_coding	ENSMMUP00000008374	XM_002802001	XP_002802047	Uncharacterized protein [Source:UniProtKB/TrEMBL;Acc:F6S7I3]
mmu_circ_020545	chr1_172910913_172921383_F	circRNA	Yes	chr1	172910913	172921383	+	249	10470	3	0,5731,10368	101,46,102	ENSMMUT00000008905	chr1:172887715-172910913|chr1:172921383-172933148	0	3	chr1	+	172745029	172950523	ENSMMUT00000008905	14	172745029,172804497,172856678,172858704,172872415,172878135,172883338,172884708,172887604,172910913,172916644,172921281,172933148,172950421,	172745096,172804541,172856728,172858824,172872485,172878216,172883398,172884762,172887715,172911014,172916690,172921383,172933274,172950523,	complete_match	ENSMMUG00000013962	172745030	172950523	172742664	172950523	+	DENND1B-202	DENND1B	protein_coding	protein_coding	ENSMMUP00000008374	XM_002802001	XP_002802047	Uncharacterized protein [Source:UniProtKB/TrEMBL;Acc:F6S7I3]
mmu_circ_020548	chr1_174104928_174212200_F	circRNA	Yes	chr1	174104928	174212200	+	1776	107272	12	0,1494,3792,6629,31461,52939,80244,82094,89063,91837,96227,107137	181,165,137,64,112,109,150,230,214,106,173,135	ENSMMUT00000044964	chr1:174066666-174104928|chr1:174212200-174222710	2	0	chr1	+	173922072	174318792	ENSMMUT00000044964	27	173922072,174037335,174039694,174048922,174052360,174062196,174063477,174066571,174104928,174106422,174108720,174111557,174136389,174157867,174185172,174187022,174193991,174196765,174201155,174212065,174222710,174242079,174245472,174246969,174269090,174310613,174318314,	173922217,174037415,174039794,174048971,174052420,174062271,174063561,174066666,174105109,174106587,174108857,174111621,174136501,174157976,174185322,174187252,174194205,174196871,174201328,174212200,174222822,174242181,174245556,174247098,174269391,174310698,174318792,	complete_match	ENSMMUG00000021082	173922073	174318792	173922073	174318792	+	KCNT2-202	KCNT2	protein_coding	protein_coding	ENSMMUP00000037977	XM_001112065	XP_001112065	Uncharacterized protein [Source:UniProtKB/TrEMBL;Acc:F7AJ27]
mmu_circ_020552	chr1_177461998_177464788_R	circRNA	Yes	chr1	177461998	177464788	-	205	2790	3	0,2575,2727	89,53,63	PREDICTED.10619.1	chr1:177458536-177461998|chr1:177464788-177469923	2	0	chr1	-	177327270	177478170	PREDICTED.10619.1	17	177327270,177342308,177355990,177358346,177381672,177382051,177390313,177448394,177450472,177452945,177458319,177461998,177464573,177464725,177469923,177474969,177477799,	177341504,177342450,177356091,177358508,177381760,177382087,177390371,177448459,177450551,177453044,177458536,177462087,177464626,177464788,177469993,177475075,177478170,	complete_match
mmu_circ_020553	chr1_18268178_18272707_F	circRNA	Yes	chr1	18268178	18272707	+	436	4529	3	0,2977,4376	137,146,153	ENSMMUT00000032966	chr1:18267324-18268178|chr1:18272707-18276845	3	0	chr1	+	18200201	18276913	ENSMMUT00000032966	8	18200201,18200556,18204269,18267195,18268178,18271155,18272554,18276845,	18200266,18200645,18204367,18267324,18268315,18271301,18272707,18276913,	complete_match	ENSMMUG00000013760	18200202	18276913	18200202	18276948	+			protein_coding	protein_coding	ENSMMUP00000030847	XM_001083099	XP_001083099	Uncharacterized protein [Source:UniProtKB/TrEMBL;Acc:F7F525]
mmu_circ_020554	chr1_18318626_18321534_F	circRNA	Yes	chr1	18318626	18321534	+	407	2908	2	0,2568	67,340	PREDICTED.3248.1	chr1:18313284-18318626|chr1:18321534-18328846	8	0	chr1	+	18310911	18357540	PREDICTED.3248.1	16	18310911,18313099,18318626,18321194,18328846,18331572,18333146,18345649,18348249,18351430,18353689,18353842,18353868,18354031,18355037,18355710,	18311000,18313284,18318693,18321534,18329031,18331677,18333305,18345780,18348433,18351635,18353737,18353852,18353949,18354130,18355208,18357540,	potentially_novel_isoform
mmu_circ_020566	chr1_185462297_185518028_R	circRNA	Yes	chr1	185462297	185518028	-	2124	55731	11	0,11064,18741,26180,28100,30168,38644,44938,47824,49428,54989	132,188,149,139,164,146,94,189,121,60,742	PREDICTED.10929.1	chr1:185428839-185462297|chr1:185518028-185524127	0	2	chr1	-	185408381	185535238	PREDICTED.10929.1	18	185408381,185423350,185428772,185462297,185473361,185481038,185488477,185490397,185492465,185500941,185507235,185510121,185511725,185517286,185524127,185525868,185531470,185535190,	185409558,185423415,185428839,185462429,185473549,185481187,185488616,185490561,185492611,185501035,185507424,185510242,185511785,185518028,185524186,185525949,185531563,185535238,	potentially_novel_isoform
mmu_circ_020568	chr1_185473361_185481187_R	circRNA	Yes	chr1	185473361	185481187	-	337	7826	2	0,7677	188,149	PREDICTED.38284.2	chr1:185462429-185473361|chr1:185481187-185488477	2	0	chr1	-	185408164	185502529	PREDICTED.38284.2	11	185408164,185423350,185428772,185462297,185473361,185481038,185488477,185490397,185492465,185500941,185502383,	185409558,185423415,185428839,185462429,185473549,185481187,185488616,185490561,185492611,185501035,185502529,	potentially_novel_isoform
mmu_circ_020570	chr1_185507235_185510242_R	circRNA	Yes	chr1	185507235	185510242	-	412	3007	3	0,592,2886	189,102,121	PREDICTED.38284.1	chr1:185501035-185507235|chr1:185510242-185511725	2	0	chr1	-	185408164	185535337	PREDICTED.38284.1	19	185408164,185423350,185428772,185462297,185473361,185481038,185488477,185490397,185492465,185500941,185507235,185507827,185510121,185511725,185517286,185524127,185525868,185531470,185535048,	185409558,185423415,185428839,185462429,185473549,185481187,185488616,185490561,185492611,185501035,185507424,185507929,185510242,185511785,185518028,185524186,185525949,185531563,185535337,	potentially_novel_isoform
mmu_circ_020571	chr1_185510121_185511785_R	circRNA	Yes	chr1	185510121	185511785	-	181	1664	2	0,1604	121,60	PREDICTED.38284.1	chr1:185507929-185510121|chr1:185511785-185517286	2	0	chr1	-	185408164	185535337	PREDICTED.38284.1	19	185408164,185423350,185428772,185462297,185473361,185481038,185488477,185490397,185492465,185500941,185507235,185507827,185510121,185511725,185517286,185524127,185525868,185531470,185535048,	185409558,185423415,185428839,185462429,185473549,185481187,185488616,185490561,185492611,185501035,185507424,185507929,185510242,185511785,185518028,185524186,185525949,185531563,185535337,	potentially_novel_isoform
mmu_circ_020575	chr1_185599497_185605349_R	circRNA	Yes	chr1	185599497	185605349	-	466	5852	3	0,1546,5763	216,161,89	PREDICTED.38239.1	chr1:185594712-185599497|chr1:185605349-185645693	3	0	chr1	-	185594092	185645897	PREDICTED.38239.1	5	185594092,185599497,185601043,185605260,185645693,	185594712,185599713,185601204,185605349,185645897,	potentially_novel_isoform
mmu_circ_020576	chr1_185783106_185797942_F	circRNA	Yes	chr1	185783106	185797942	+	547	14836	4	0,5271,9208,14668	140,124,115,168	PREDICTED.38494.1	chr1:185711896-185783106|chr1:185797942-185844882	2	0	chr1	+	185711605	185883215	PREDICTED.38494.1	15	185711605,185783106,185788377,185792314,185797774,185844882,185853142,185853555,185858399,185868971,185871149,185873178,185876969,185879067,185881281,	185711896,185783246,185788501,185792429,185797942,185844998,185853247,185853718,185858587,185869133,185871260,185873286,185877081,185881214,185883215,	potentially_novel_isoform
mmu_circ_020592	chr1_188282839_188284061_F	ciRNA	Yes	chr1	188282839	188284061	+	1222	1222	1	0	1222	PREDICTED.39117.1	chr1:188282839-188284099	2	0	chr1	+	188278963	188288017	PREDICTED.39117.1	7	188278963,188282660,188284099,188284990,188285498,188285829,188286659,	188279749,188282839,188284261,188285137,188285626,188286029,188288017,	complete_match
mmu_circ_020600	chr1_190656074_190716323_R	circRNA	Yes	chr1	190656074	190716323	-	3715	60249	18	0,11235,14131,21681,22253,23022,27525,31602,32575,33981,34533,38946,41947,44554,51200,52943,54820,60127	200,158,147,88,185,197,170,123,137,141,111,164,221,175,164,151,1061,122	PREDICTED.11632.1	chr1:190652790-190656074|chr1:190716323-190717328	0	2	chr1	-	190616154	190778678	PREDICTED.11632.1	37	190616154,190632093,190634878,190635121,190636442,190640266,190642746,190646297,190650367,190652578,190656074,190667309,190670205,190677755,190678327,190679096,190683599,190687676,190688649,190690055,190690607,190695020,190698021,190700628,190707274,190709017,190710894,190716201,190717328,190719726,190725231,190728733,190735529,190741081,190745889,190746919,190778328,	190620189,190632216,190635025,190635529,190638445,190640349,190642886,190646458,190650512,190652790,190656274,190667467,190670352,190677843,190678512,190679293,190683769,190687799,190688786,190690196,190690718,190695184,190698242,190700803,190707438,190709168,190711955,190716323,190717987,190719873,190725345,190728847,190736152,190741241,190745936,190747005,190778678,	potentially_novel_isoform
mmu_circ_020604	chr1_190695020_190716323_R	circRNA	Yes	chr1	190695020	190716323	-	2058	21303	7	0,3001,5608,12254,13997,15874,21181	164,221,175,164,151,1061,122	PREDICTED.39932.1	chr1:190690718-190695020|chr1:190716323-190716656	2	0	chr1	-	190616836	190716951	PREDICTED.39932.1	30	190616836,190632093,190634878,190635121,190636442,190640266,190642746,190646297,190650367,190652578,190656074,190657385,190667309,190670205,190677755,190678327,190679096,190683599,190687676,190688649,190690055,190690607,190695020,190698021,190700628,190707274,190709017,190710894,190716201,190716656,	190620189,190632216,190635025,190635529,190638445,190640349,190642886,190646458,190650512,190652790,190656274,190657508,190667467,190670352,190677843,190678512,190679293,190683769,190687799,190688786,190690196,190690718,190695184,190698242,190700803,190707438,190709168,190711955,190716323,190716951,	potentially_novel_isoform
mmu_circ_020610	chr1_191932912_191939822_R	circRNA	Yes	chr1	191932912	191939822	-	296	6910	3	0,1081,6770	51,105,140	PREDICTED.39677.1	chr1:191912031-191932912|chr1:191939822-191991471	5	0	chr1	-	191808079	191991557	PREDICTED.39677.1	22	191808079,191821014,191826001,191830395,191833203,191834896,191837440,191840710,191841621,191843302,191847920,191849240,191887570,191899422,191899714,191900057,191900668,191911947,191932912,191933993,191939682,191991471,	191811866,191821106,191826107,191830488,191833309,191834974,191837495,191840862,191841757,191843370,191848011,191849378,191887697,191899515,191899752,191900090,191900684,191912031,191932963,191934098,191939822,191991557,	potentially_novel_isoform
mmu_circ_020614	chr1_197678835_197693313_F	ciRNA	Yes	chr1	197678835	197693313	+	14478	14478	1	0	14478	ENSMMUT00000014539	chr1:197678835-197693338	0	2	chr1	+	197663259	197805364	ENSMMUT00000014539	19	197663259,197678773,197693338,197704253,197717221,197720851,197723090,197732314,197733702,197734361,197769525,197773980,197775525,197775840,197793588,197795566,197796360,197798351,197804903,	197663590,197678835,197693431,197704439,197717335,197720987,197723305,197732408,197733822,197734622,197769643,197774096,197775612,197776168,197793727,197795723,197796449,197798457,197805364,	complete_match	ENSMMUG00000010389	197663260	197805364	197663256	197805364	+	DCAF6-202	DCAF6	protein_coding	protein_coding	ENSMMUP00000013621	XM_001091583	XP_001091583	Uncharacterized protein [Source:UniProtKB/TrEMBL;Acc:F7BF92]
mmu_circ_020619	chr1_197796360_197798457_F	circRNA	Yes	chr1	197796360	197798457	+	195	2097	2	0,1991	89,106	ENSMMUT00000014539	chr1:197795723-197796360|chr1:197798457-197804903	0	2	chr1	+	197663259	197805364	ENSMMUT00000014539	19	197663259,197678773,197693338,197704253,197717221,197720851,197723090,197732314,197733702,197734361,197769525,197773980,197775525,197775840,197793588,197795566,197796360,197798351,197804903,	197663590,197678835,197693431,197704439,197717335,197720987,197723305,197732408,197733822,197734622,197769643,197774096,197775612,197776168,197793727,197795723,197796449,197798457,197805364,	complete_match	ENSMMUG00000010389	197663260	197805364	197663256	197805364	+	DCAF6-202	DCAF6	protein_coding	protein_coding	ENSMMUP00000013621	XM_001091583	XP_001091583	Uncharacterized protein [Source:UniProtKB/TrEMBL;Acc:F7BF92]
mmu_circ_020620	chr1_199083131_199083263_F	ciRNA	Yes	chr1	199083131	199083263	+	132	132	1	0	132	PREDICTED.12883.3	chr1:199083131-199083289	0	2	chr1	+	199074171	199083313	PREDICTED.12883.3	4	199074171,199075653,199082691,199083289,	199074527,199075731,199083131,199083313,	potentially_novel_isoform
mmu_circ_020622	chr1_199588105_199590602_R	circRNA	Yes	chr1	199588105	199590602	-	300	2497	2	0,2311	114,186	ENSMMUT00000023288	chr1:199585898-199588105|chr1:199590602-199601296	0	2	chr1	-	199563271	199606524	ENSMMUT00000023288	13	199563271,199564462,199570134,199574655,199576429,199578981,199581004,199582336,199585841,199588105,199590416,199601296,199606415,	199563958,199565139,199570306,199574840,199576569,199579059,199581116,199582439,199585898,199588219,199590602,199601511,199606524,	complete_match	ENSMMUG00000016583	199563272	199606524	199563272	199606578	-	SCYL3-201	SCYL3	protein_coding	protein_coding	ENSMMUP00000021789	XM_001096164	XP_001096164	SCY1-like 3 (S. cerevisiae) [Source:HGNC Symbol;Acc:HGNC:19285]
mmu_circ_020623	chr1_2003867_2006255_R	circRNA	Yes	chr1	2003867	2006255	-	457	2388	3	0,1295,2256	201,124,132	PREDICTED.453.2	chr1:2002277-2003867|chr1:2006255-2017465	2	0	chr1	-	1978198	2057501	PREDICTED.453.2	23	1978198,1981523,1982869,1983438,1996289,1997715,1999426,2001251,2001590,2002097,2003867,2005162,2006123,2017465,2018715,2018908,2030923,2031154,2031321,2038788,2040407,2053061,2056803,	1979572,1981728,1982976,1983580,1996406,1997985,1999530,2001457,2001747,2002277,2004068,2005286,2006255,2017590,2018797,2018988,2031052,2031190,2031329,2039282,2040574,2053224,2057501,	potentially_novel_isoform
mmu_circ_020624	chr1_200407544_200418199_F	circRNA	Yes	chr1	200407544	200418199	+	430	10655	3	0,6523,10583	176,182,72	PREDICTED.11807.1	chr1:200353124-200407544|chr1:200418199-200423752	0	3	chr1	+	200352718	200427066	PREDICTED.11807.1	5	200352718,200407544,200414067,200418127,200423752,	200353124,200407720,200414249,200418199,200427066,	potentially_novel_isoform
mmu_circ_020626	chr1_201235486_201237218_F	circRNA	Yes	chr1	201235486	201237218	+	367	1732	3	0,214,1587	134,88,145	PREDICTED.41905.1	chr1:201234525-201235486|chr1:201237218-201240279	2	0	chr1	+	201199054	201305773	PREDICTED.41905.1	34	201199054,201223590,201224533,201226061,201227256,201229736,201234442,201235486,201235700,201237073,201240279,201244728,201247871,201248466,201249697,201252358,201257612,201261622,201268807,201272595,201277884,201278243,201279912,201283004,201286692,201289480,201291371,201291848,201296003,201296467,201298972,201299613,201300346,201303620,	201199302,201223759,201224711,201226156,201227382,201229960,201234525,201235620,201235788,201237218,201240333,201245341,201248041,201248716,201249908,201254617,201257821,201261777,201269705,201272681,201278073,201278495,201280005,201283106,201286894,201289684,201291484,201291985,201296235,201296575,201299191,201299717,201300473,201305773,	potentially_novel_isoform
mmu_circ_020627	chr1_201235486_201240333_F	circRNA	Yes	chr1	201235486	201240333	+	421	4847	4	0,214,1587,4793	134,88,145,54	PREDICTED.41905.1	chr1:201234525-201235486|chr1:201240333-201244728	2	0	chr1	+	201199054	201305773	PREDICTED.41905.1	34	201199054,201223590,201224533,201226061,201227256,201229736,201234442,201235486,201235700,201237073,201240279,201244728,201247871,201248466,201249697,201252358,201257612,201261622,201268807,201272595,201277884,201278243,201279912,201283004,201286692,201289480,201291371,201291848,201296003,201296467,201298972,201299613,201300346,201303620,	201199302,201223759,201224711,201226156,201227382,201229960,201234525,201235620,201235788,201237218,201240333,201245341,201248041,201248716,201249908,201254617,201257821,201261777,201269705,201272681,201278073,201278495,201280005,201283106,201286894,201289684,201291484,201291985,201296235,201296575,201299191,201299717,201300473,201305773,	potentially_novel_isoform
mmu_circ_020628	chr1_201277884_201278495_F	circRNA	Yes	chr1	201277884	201278495	+	441	611	2	0,359	189,252	PREDICTED.41905.1	chr1:201272681-201277884|chr1:201278495-201279912	1	1	chr1	+	201199054	201305773	PREDICTED.41905.1	34	201199054,201223590,201224533,201226061,201227256,201229736,201234442,201235486,201235700,201237073,201240279,201244728,201247871,201248466,201249697,201252358,201257612,201261622,201268807,201272595,201277884,201278243,201279912,201283004,201286692,201289480,201291371,201291848,201296003,201296467,201298972,201299613,201300346,201303620,	201199302,201223759,201224711,201226156,201227382,201229960,201234525,201235620,201235788,201237218,201240333,201245341,201248041,201248716,201249908,201254617,201257821,201261777,201269705,201272681,201278073,201278495,201280005,201283106,201286894,201289684,201291484,201291985,201296235,201296575,201299191,201299717,201300473,201305773,	potentially_novel_isoform
mmu_circ_020629	chr1_201286692_201289684_F	circRNA	Yes	chr1	201286692	201289684	+	406	2992	2	0,2788	202,204	PREDICTED.41905.1	chr1:201283106-201286692|chr1:201289684-201291371	2	0	chr1	+	201199054	201305773	PREDICTED.41905.1	34	201199054,201223590,201224533,201226061,201227256,201229736,201234442,201235486,201235700,201237073,201240279,201244728,201247871,201248466,201249697,201252358,201257612,201261622,201268807,201272595,201277884,201278243,201279912,201283004,201286692,201289480,201291371,201291848,201296003,201296467,201298972,201299613,201300346,201303620,	201199302,201223759,201224711,201226156,201227382,201229960,201234525,201235620,201235788,201237218,201240333,201245341,201248041,201248716,201249908,201254617,201257821,201261777,201269705,201272681,201278073,201278495,201280005,201283106,201286894,201289684,201291484,201291985,201296235,201296575,201299191,201299717,201300473,201305773,	potentially_novel_isoform
mmu_circ_020634	chr1_202297950_202300985_F	circRNA	Yes	chr1	202297950	202300985	+	352	3035	3	0,2314,2943	105,155,92	ENSMMUT00000019300	chr1:202289254-202297950|chr1:202300985-202307627	2	0	chr1	+	202228503	202310737	ENSMMUT00000019300	24	202228503,202228600,202229220,202246804,202251280,202252725,202253085,202264444,202265472,202266087,202272001,202273630,202275939,202276481,202277382,202283173,202284019,202286944,202289166,202297950,202300264,202300893,202307627,202308722,	202228582,202228846,202229540,202246919,202251435,202252863,202253236,202264568,202265597,202266155,202272109,202273736,202275995,202276573,202277448,202283242,202284110,202288108,202289254,202298055,202300419,202300985,202307683,202310737,	complete_match	ENSMMUG00000007280	202228504	202310737	202228504	202310737	+	SUCO-201	SUCO	protein_coding	protein_coding	ENSMMUP00000018073	XM_002802066	XP_002802112	SUN domain containing ossification factor [Source:HGNC Symbol;Acc:HGNC:1240]
mmu_circ_020636	chr1_203051476_203067785_R	circRNA	Yes	chr1	203051476	203067785	-	304	16309	2	0,16136	131,173	PREDICTED.12231.2	chr1:202895605-203051476|chr1:203067785-203122112	0	3	chr1	-	202872665	203122295	PREDICTED.12231.2	6	202872665,202877753,202895443,203051476,203067612,203122112,	202876083,202877802,202895605,203051607,203067785,203122295,	potentially_novel_isoform
mmu_circ_020646	chr1_203918368_203927306_F	circRNA	Yes	chr1	203918368	203927306	+	337	8938	3	0,4837,8771	67,103,167	PREDICTED.12701.1	chr1:203899011-203918368|chr1:203927306-203945177	0	2	chr1	+	203805964	204284525	PREDICTED.12701.1	15	203805964,203871726,203873931,203883775,203887800,203896890,203898900,203918368,203923205,203927139,203945177,204006915,204023627,204239426,204284110,	203806127,203871897,203874124,203883986,203887975,203897048,203899011,203918435,203923308,203927306,203945319,204007009,204023778,204239540,204284525,	potentially_novel_isoform
mmu_circ_020648	chr1_203945177_204023778_F	circRNA	Yes	chr1	203945177	204023778	+	387	78601	3	0,61738,78450	142,94,151	PREDICTED.12701.1	chr1:203927306-203945177|chr1:204023778-204239426	0	2	chr1	+	203805964	204284525	PREDICTED.12701.1	15	203805964,203871726,203873931,203883775,203887800,203896890,203898900,203918368,203923205,203927139,203945177,204006915,204023627,204239426,204284110,	203806127,203871897,203874124,203883986,203887975,203897048,203899011,203918435,203923308,203927306,203945319,204007009,204023778,204239540,204284525,	potentially_novel_isoform
mmu_circ_020649	chr1_2053061_2053224_R	circRNA	Yes	chr1	2053061	2053224	-	163	163	1	0	163	PREDICTED.453.2	chr1:2040574-2053061|chr1:2053224-2056803	2	0	chr1	-	1978198	2057501	PREDICTED.453.2	23	1978198,1981523,1982869,1983438,1996289,1997715,1999426,2001251,2001590,2002097,2003867,2005162,2006123,2017465,2018715,2018908,2030923,2031154,2031321,2038788,2040407,2053061,2056803,	1979572,1981728,1982976,1983580,1996406,1997985,1999530,2001457,2001747,2002277,2004068,2005286,2006255,2017590,2018797,2018988,2031052,2031190,2031329,2039282,2040574,2053224,2057501,	potentially_novel_isoform
mmu_circ_020650	chr1_205637474_205691830_R	circRNA	Yes	chr1	205637474	205691830	-	703	54356	6	0,15526,16054,18566,49963,54241	117,82,109,144,136,115	ENSMMUT00000044568	chr1:205612618-205637474|chr1:205691830-205720849	3	0	chr1	-	205556396	205811563	ENSMMUT00000044568	18	205556396,205558751,205610078,205611422,205612500,205637474,205653000,205653528,205656040,205687437,205691715,205720849,205739379,205740865,205754241,205781393,205789222,205811443,	205556736,205558796,205610239,205611547,205612618,205637591,205653082,205653637,205656184,205687573,205691830,205720907,205739456,205740925,205754310,205781491,205789282,205811563,	complete_match	ENSMMUG00000002072	205556397	205811563	205556392	205812114	-	RFWD2-202	RFWD2	protein_coding	protein_coding	ENSMMUP00000037591			E3 ubiquitin-protein ligase RFWD2 isoform a; Uncharacterized protein [Source:UniProtKB/TrEMBL;Acc:F6QR11]
mmu_circ_020652	chr1_205720849_205754310_R	circRNA	Yes	chr1	205720849	205754310	-	264	33461	4	0,18530,20016,33392	58,77,60,69	ENSMMUT00000044568	chr1:205691830-205720849|chr1:205754310-205781393	2	0	chr1	-	205556396	205811563	ENSMMUT00000044568	18	205556396,205558751,205610078,205611422,205612500,205637474,205653000,205653528,205656040,205687437,205691715,205720849,205739379,205740865,205754241,205781393,205789222,205811443,	205556736,205558796,205610239,205611547,205612618,205637591,205653082,205653637,205656184,205687573,205691830,205720907,205739456,205740925,205754310,205781491,205789282,205811563,	complete_match	ENSMMUG00000002072	205556397	205811563	205556392	205812114	-	RFWD2-202	RFWD2	protein_coding	protein_coding	ENSMMUP00000037591			E3 ubiquitin-protein ligase RFWD2 isoform a; Uncharacterized protein [Source:UniProtKB/TrEMBL;Acc:F6QR11]
mmu_circ_020655	chr1_205754241_205781491_R	circRNA	Yes	chr1	205754241	205781491	-	167	27250	2	0,27152	69,98	ENSMMUT00000044568	chr1:205740925-205754241|chr1:205781491-205789222	2	0	chr1	-	205556396	205811563	ENSMMUT00000044568	18	205556396,205558751,205610078,205611422,205612500,205637474,205653000,205653528,205656040,205687437,205691715,205720849,205739379,205740865,205754241,205781393,205789222,205811443,	205556736,205558796,205610239,205611547,205612618,205637591,205653082,205653637,205656184,205687573,205691830,205720907,205739456,205740925,205754310,205781491,205789282,205811563,	complete_match	ENSMMUG00000002072	205556397	205811563	205556392	205812114	-	RFWD2-202	RFWD2	protein_coding	protein_coding	ENSMMUP00000037591			E3 ubiquitin-protein ligase RFWD2 isoform a; Uncharacterized protein [Source:UniProtKB/TrEMBL;Acc:F6QR11]
mmu_circ_020662	chr1_210101822_210104027_F	circRNA	Yes	chr1	210101822	210104027	+	275	2205	3	0,1864,2148	94,124,57	PREDICTED.12506.1	chr1:210100931-210101822|chr1:210104027-210104852	0	2	chr1	+	210055700	210153586	PREDICTED.12506.1	36	210055700,210070219,210072523,210076134,210082386,210084841,210086478,210087910,210090331,210090557,210091240,210092709,210095583,210096773,210099966,210100826,210101822,210103686,210103970,210104852,210106830,210115490,210115711,210116629,210124920,210125678,210128741,210130413,210131268,210135030,210137776,210140445,210143581,210150884,210152020,210153497,	210056085,210070347,210072777,210076315,210082594,210084958,210086563,210088061,210090464,210090739,210091302,210092838,210095674,210096863,210100107,210100931,210101916,210103810,210104027,210104999,210107018,210115635,210115843,210116780,210125071,210125786,210128934,210130608,210131665,210135154,210137874,210140654,210145406,210151018,210152103,210153586,	potentially_novel_isoform
mmu_circ_020669	chr1_211965992_211967422_R	circRNA	Yes	chr1	211965992	211967422	-	190	1430	3	0,206,1350	67,43,80	PREDICTED.43800.1	chr1:211962466-211965992|chr1:211967422-211990747	2	1	chr1	-	211959013	211992452	PREDICTED.43800.1	6	211959013,211965992,211966198,211967342,211990747,211992159,	211962466,211966059,211966241,211967422,211990820,211992452,	potentially_novel_isoform
mmu_circ_020670	chr1_211965992_212036579_R	circRNA	Yes	chr1	211965992	212036579	-	275	70587	4	0,206,1350,70502	67,43,80,85	PREDICTED.43800.4	chr1:211965020-211965992|chr1:212036579-212051471	3	0	chr1	-	211963367	212051811	PREDICTED.43800.4	6	211963367,211965992,211966198,211967342,212036494,212051471,	211965020,211966059,211966241,211967422,212036579,212051811,	potentially_novel_isoform
mmu_circ_020673	chr1_212465922_212474114_R	circRNA	Yes	chr1	212465922	212474114	-	245	8192	2	0,8105	158,87	PREDICTED.12484.5	chr1:212449205-212465922|chr1:212474114-212477033	2	1	chr1	-	212442318	212620946	PREDICTED.12484.5	20	212442318,212449151,212465922,212474027,212477033,212489198,212489348,212491058,212494229,212498974,212501148,212510436,212521770,212530362,212585999,212602065,212604188,212604549,212618306,212620782,	212442745,212449205,212466080,212474114,212477133,212489278,212489382,212491109,212494282,212499050,212501207,212510879,212522248,212530855,212586077,212602133,212604258,212604623,212618355,212620946,	potentially_novel_isoform
mmu_circ_020676	chr1_213692130_213694497_R	circRNA	Yes	chr1	213692130	213694497	-	237	2367	2	0,2239	109,128	PREDICTED.15015.3	chr1:213683829-213692130|chr1:213694497-213731587	0	2	chr1	-	213614373	213853036	PREDICTED.15015.3	17	213614373,213683697,213692130,213694369,213731587,213765429,213768639,213778790,213792550,213803095,213806500,213818305,213825382,213836107,213839896,213840705,213852851,	213614552,213683829,213692239,213694497,213731730,213765546,213768774,213778943,213792689,213803284,213806565,213818434,213825508,213836221,213839979,213840858,213853036,	potentially_novel_isoform
mmu_circ_020679	chr1_213792550_213806565_R	circRNA	Yes	chr1	213792550	213806565	-	393	14015	3	0,10545,13950	139,189,65	PREDICTED.15015.3	chr1:213778943-213792550|chr1:213806565-213818305	0	2	chr1	-	213614373	213853036	PREDICTED.15015.3	17	213614373,213683697,213692130,213694369,213731587,213765429,213768639,213778790,213792550,213803095,213806500,213818305,213825382,213836107,213839896,213840705,213852851,	213614552,213683829,213692239,213694497,213731730,213765546,213768774,213778943,213792689,213803284,213806565,213818434,213825508,213836221,213839979,213840858,213853036,	potentially_novel_isoform
mmu_circ_020681	chr1_213882011_213942694_F	circRNA	Yes	chr1	213882011	213942694	+	3903	60683	11	0,3471,12143,23494,23649,25129,33299,38081,51900,55219,58850	146,90,79,59,163,135,477,644,150,127,1833	PREDICTED.47202.1	chr1:213854052-213882011|chr1:213942694-213950486	1	2	chr1	+	213853455	213983178	PREDICTED.47202.1	19	213853455,213882011,213885482,213894154,213905505,213905660,213907140,213915310,213920092,213933911,213937230,213940861,213950486,213965094,213967475,213971052,213978111,213979272,213980862,	213854052,213882157,213885572,213894233,213905564,213905823,213907275,213915787,213920736,213934061,213937357,213942694,213950721,213965272,213967646,213971141,213978205,213979324,213983178,	potentially_novel_isoform
mmu_circ_020682	chr1_213894154_213907275_F	circRNA	Yes	chr1	213894154	213907275	+	436	13121	4	0,11351,11506,12986	79,59,163,135	PREDICTED.12545.1	chr1:213885572-213894154|chr1:213907275-213915310	0	2	chr1	+	213853312	213980883	PREDICTED.12545.1	19	213853312,213882011,213885482,213894154,213905505,213905660,213907140,213915310,213920092,213933911,213937230,213940861,213950486,213965094,213967475,213971052,213978111,213979272,213980862,	213854052,213882157,213885572,213894233,213905564,213905823,213907275,213915787,213920256,213934061,213937357,213942694,213950721,213965272,213967646,213971141,213978205,213979324,213980883,	potentially_novel_isoform
mmu_circ_020688	chr1_21901927_21902329_R	circRNA	Yes	chr1	21901927	21902329	-	160	402	2	0,336	94,66	ENSMMUT00000009373	chr1:21900747-21901927|chr1:21902329-21903511	1	1	chr1	-	21875653	21905691	ENSMMUT00000009373	24	21875653,21876823,21877194,21878378,21880706,21881474,21885277,21888765,21889194,21890269,21890582,21892798,21894814,21895692,21896468,21896904,21897493,21897969,21898685,21900618,21901927,21902263,21903511,21905553,	21876725,21877108,21877324,21878463,21880917,21881648,21885415,21888885,21889356,21890419,21890782,21892921,21894911,21895815,21896531,21896976,21897661,21898119,21898812,21900747,21902021,21902329,21903636,21905691,	complete_match	ENSMMUG00000006688	21875654	21905691	21875654	21905691	-	EMC1-202	EMC1	protein_coding	protein_coding	ENSMMUP00000008807	XM_001091700	XP_001091700	Uncharacterized protein [Source:UniProtKB/TrEMBL;Acc:F7FSE2]
mmu_circ_020690	chr1_220200129_220209149_R	circRNA	Yes	chr1	220200129	220209149	-	402	9020	4	0,3488,6485,8952	141,113,80,68	PREDICTED.12554.1	chr1:220197414-220200129|chr1:220209149-220210567	0	2	chr1	-	220094330	220231659	PREDICTED.12554.1	32	220094330,220133618,220136268,220137843,220138836,220142205,220144246,220147206,220148351,220152739,220158686,220160030,220169980,220171181,220174553,220175893,220182684,220183136,220185269,220197228,220200129,220203617,220206614,220209081,220210567,220211780,220220312,220221193,220224017,220227803,220229627,220231565,	220094429,220135838,220136381,220138036,220139037,220142402,220144402,220147282,220148450,220152821,220158807,220160098,220170081,220171289,220174706,220175983,220182825,220183253,220185449,220197414,220200270,220203730,220206694,220209149,220210629,220211881,220220407,220221253,220224124,220227896,220229697,220231659,	potentially_novel_isoform
mmu_circ_020692	chr1_220269325_220270540_R	ciRNA	Yes	chr1	220269325	220270540	-	1215	1215	1	0	1215	PREDICTED.16271.1	chr1:220269302-220270540	0	4	chr1	-	220265945	220297380	PREDICTED.16271.1	14	220265945,220269143,220270540,220273966,220275030,220276130,220278539,220280902,220282395,220286089,220287817,220290819,220293136,220294643,	220267865,220269302,220270606,220274113,220275210,220276265,220278722,220281043,220282504,220286240,220287965,220291050,220293229,220297380,	potentially_novel_isoform
mmu_circ_020693	chr1_220269327_220270540_R	ciRNA	Yes	chr1	220269327	220270540	-	1213	1213	1	0	1213	PREDICTED.16271.2	chr1:220269302-220270540	1	2	chr1	-	220265945	220342346	PREDICTED.16271.2	21	220265945,220269143,220270540,220273966,220275030,220276130,220278539,220280902,220282395,220286089,220287817,220290819,220293136,220294643,220299167,220302654,220304404,220310186,220311368,220312414,220342147,	220267865,220269302,220270606,220274113,220275210,220276265,220278722,220281043,220282504,220286240,220287965,220291050,220293229,220294729,220299249,220302733,220304492,220310273,220311488,220312529,220342346,	complete_match
mmu_circ_020696	chr1_220293246_220294643_R	ciRNA	Yes	chr1	220293246	220294643	-	1397	1397	1	0	1397	PREDICTED.16271.1	chr1:220293229-220294643	0	12	chr1	-	220265945	220297380	PREDICTED.16271.1	14	220265945,220269143,220270540,220273966,220275030,220276130,220278539,220280902,220282395,220286089,220287817,220290819,220293136,220294643,	220267865,220269302,220270606,220274113,220275210,220276265,220278722,220281043,220282504,220286240,220287965,220291050,220293229,220297380,	potentially_novel_isoform
mmu_circ_020697	chr1_220299167_220312529_R	circRNA	Yes	chr1	220299167	220312529	-	571	13362	6	0,3487,5237,11019,12201,13247	82,79,88,87,120,115	PREDICTED.16271.2	chr1:220294729-220299167|chr1:220312529-220342147	2	0	chr1	-	220265945	220342346	PREDICTED.16271.2	21	220265945,220269143,220270540,220273966,220275030,220276130,220278539,220280902,220282395,220286089,220287817,220290819,220293136,220294643,220299167,220302654,220304404,220310186,220311368,220312414,220342147,	220267865,220269302,220270606,220274113,220275210,220276265,220278722,220281043,220282504,220286240,220287965,220291050,220293229,220294729,220299249,220302733,220304492,220310273,220311488,220312529,220342346,	complete_match
mmu_circ_020699	chr1_220311510_220312414_R	ciRNA	Yes	chr1	220311510	220312414	-	904	904	1	0	904	PREDICTED.16271.2	chr1:220311488-220312414	0	3	chr1	-	220265945	220342346	PREDICTED.16271.2	21	220265945,220269143,220270540,220273966,220275030,220276130,220278539,220280902,220282395,220286089,220287817,220290819,220293136,220294643,220299167,220302654,220304404,220310186,220311368,220312414,220342147,	220267865,220269302,220270606,220274113,220275210,220276265,220278722,220281043,220282504,220286240,220287965,220291050,220293229,220294729,220299249,220302733,220304492,220310273,220311488,220312529,220342346,	complete_match
mmu_circ_020700	chr1_22034584_22041499_R	circRNA	Yes	chr1	22034584	22041499	-	236	6915	2	0,6793	114,122	ENSMMUT00000009634	chr1:22012045-22034584|chr1:22041499-22078426	1	1	chr1	-	21991986	22078516	ENSMMUT00000009634	8	21991986,21997492,21998315,22011819,22011903,22034584,22041377,22078426,	21992825,21997569,21998422,22011889,22012045,22034698,22041499,22078516,	complete_match	ENSMMUG00000006894	21991987	22078516	21991987	22078525	-	CAPZB-201	CAPZB	protein_coding	protein_coding	ENSMMUP00000009051			capping protein (actin filament) muscle Z-line, beta [Source:HGNC Symbol;Acc:HGNC:1491]
mmu_circ_020725	chr1_223765404_223775194_F	circRNA	Yes	chr1	223765404	223775194	+	363	9790	3	0,9504,9757	146,184,33	ENSMMUT00000017690	chr1:223756090-223765404|chr1:223775194-223784398	0	4	chr1	+	223739806	223791708	ENSMMUT00000017690	8	223739806,223741683,223755954,223765404,223774908,223775161,223784398,223790943,	223740145,223741777,223756090,223765550,223775092,223775194,223784570,223791708,	complete_match	ENSMMUG00000012617	223739807	223791708	223732932	223791708	+			protein_coding	protein_coding	ENSMMUP00000016566			Uncharacterized protein [Source:UniProtKB/TrEMBL;Acc:F7F4T1]
mmu_circ_020727	chr1_226296004_226304418_R	circRNA	Yes	chr1	226296004	226304418	-	599	8414	5	0,2138,2888,6986,8333	125,180,109,104,81	ENSMMUT00000008227	chr1:226292677-226296004|chr1:226304418-226306688	3	5	chr1	-	226273373	226324890	ENSMMUT00000008227	18	226273373,226275783,226277117,226278737,226279166,226280171,226282064,226283668,226288582,226292550,226296004,226298142,226298892,226302990,226304337,226306688,226307880,226324703,	226274065,226275965,226277257,226278877,226279239,226280369,226282216,226283730,226288722,226292677,226296129,226298322,226299001,226303094,226304418,226306754,226308042,226324890,	complete_match	ENSMMUG00000005877	226273374	226324890	226273374	226324890	-	COG2-201	COG2	protein_coding	protein_coding	ENSMMUP00000007733			component of oligomeric golgi complex 2 [Source:HGNC Symbol;Acc:HGNC:6546]
mmu_circ_020734	chr1_227479457_227498693_F	circRNA	Yes	chr1	227479457	227498693	+	1224	19236	8	0,5556,10004,11253,12220,13416,16187,19100	95,225,123,100,252,134,159,136	ENSMMUT00000031079	chr1:227477908-227479457|chr1:227498693-227504257	2	0	chr1	+	227446953	227516725	ENSMMUT00000031079	28	227446953,227449016,227453318,227454552,227455590,227456906,227457049,227457105,227459319,227459790,227465265,227467716,227468820,227471101,227477744,227479457,227485013,227489461,227490710,227491677,227492873,227495644,227498557,227504257,227506462,227507838,227512297,227515962,	227447135,227449135,227453422,227454660,227455700,227456915,227457065,227457276,227459475,227459861,227465413,227467864,227468978,227471193,227477908,227479552,227485238,227489584,227490810,227491929,227493007,227495803,227498693,227504376,227506543,227507903,227512386,227516725,	complete_match	ENSMMUG00000022091	227446954	227516725	227446954	227528201	+	NUP133-202	NUP133	protein_coding	protein_coding	ENSMMUP00000029089			nucleoporin 133kDa [Source:HGNC Symbol;Acc:HGNC:18016]
mmu_circ_020739	chr1_23433851_23445610_R	circRNA	Yes	chr1	23433851	23445610	-	694	11759	5	0,2167,5473,8345,11605	155,81,144,160,154	ENSMMUT00000047511	chr1:23424025-23433851|chr1:23445610-23448940	2	0	chr1	-	23409374	23449643	ENSMMUT00000047511	13	23409374,23410962,23412387,23414350,23416564,23423934,23433851,23436018,23439324,23442196,23445456,23448940,23449477,	23409419,23411310,23412501,23414462,23416724,23424025,23434006,23436099,23439468,23442356,23445610,23449040,23449643,	complete_match	ENSMMUG00000008852	23409375	23449643	23409375	23449643	-	HP1BP3-202	HP1BP3	protein_coding	protein_coding	ENSMMUP00000040546	XM_001098287	XP_001098287	Uncharacterized protein [Source:UniProtKB/TrEMBL;Acc:F7DYV3]
mmu_circ_020745	chr1_23601278_23643099_R	circRNA	Yes	chr1	23601278	23643099	-	1465	41821	6	0,8713,29722,33262,40920,41641	840,109,123,98,115,180	PREDICTED.4691.1	chr1:23565710-23601278|chr1:23643099-23659120	2	0	chr1	-	23564719	23662718	PREDICTED.4691.1	8	23564719,23601278,23609991,23631000,23634540,23642198,23642919,23659120,	23565710,23602118,23610100,23631123,23634638,23642313,23643099,23662718,	potentially_novel_isoform
mmu_circ_020759	chr1_24673738_24674166_F	circRNA	Yes	chr1	24673738	24674166	+	308	428	2	0,230	110,198	ENSMMUT00000030969	chr1:24669234-24673738|chr1:24674166-24678689	2	0	chr1	+	24665867	24680191	ENSMMUT00000030969	5	24665867,24669161,24673738,24673968,24678689,	24666027,24669234,24673848,24674166,24680191,	complete_match	ENSMMUG00000022009	24665868	24680191	24665868	24680191	+	CDC42-201	CDC42	protein_coding	protein_coding	ENSMMUP00000040537	XM_001100274	XP_001117013	Cell division control protein 42 homolog isoform 2; Uncharacterized protein [Source:UniProtKB/TrEMBL;Acc:F6RBZ7]
mmu_circ_020764	chr1_25631507_25635615_F	circRNA	Yes	chr1	25631507	25635615	+	361	4108	4	0,1627,2479,4026	79,93,107,82	PREDICTED.5312.1	chr1:25627930-25631507|chr1:25635615-25636900	2	0	chr1	+	25595961	25667341	PREDICTED.5312.1	18	25595961,25607639,25621880,25627796,25631507,25633134,25633986,25635533,25636900,25646769,25647291,25649360,25650253,25651426,25655354,25657107,25657667,25659560,	25596416,25607805,25621940,25627930,25631586,25633227,25634093,25635615,25636995,25646912,25647382,25649495,25650327,25651538,25655487,25657295,25657782,25667341,	potentially_novel_isoform
mmu_circ_020767	chr1_25646769_25649495_F	circRNA	Yes	chr1	25646769	25649495	+	369	2726	3	0,522,2591	143,91,135	PREDICTED.5312.1	chr1:25636995-25646769|chr1:25649495-25650253	2	0	chr1	+	25595961	25667341	PREDICTED.5312.1	18	25595961,25607639,25621880,25627796,25631507,25633134,25633986,25635533,25636900,25646769,25647291,25649360,25650253,25651426,25655354,25657107,25657667,25659560,	25596416,25607805,25621940,25627930,25631586,25633227,25634093,25635615,25636995,25646912,25647382,25649495,25650327,25651538,25655487,25657295,25657782,25667341,	potentially_novel_isoform
mmu_circ_020773	chr1_27291521_27292301_F	ciRNA	Yes	chr1	27291521	27292301	+	780	780	1	0	780	PREDICTED.5528.3	chr1:27291521-27292317	2	0	chr1	+	27282914	27311074	PREDICTED.5528.3	16	27282914,27285828,27286213,27288411,27289864,27291317,27292317,27292816,27294760,27300586,27301171,27302796,27303314,27306904,27309174,27310171,	27283161,27285918,27286336,27288582,27289980,27291521,27292512,27292936,27295035,27300667,27301258,27302941,27303356,27307015,27309639,27311074,	potentially_novel_isoform
mmu_circ_020775	chr1_28418502_28419615_F	ciRNA	Yes	chr1	28418502	28419615	+	1113	1113	1	0	1113	PREDICTED.5696.5	chr1:28418502-28419637	2	0	chr1	+	28415447	28422700	PREDICTED.5696.5	7	28415447,28417190,28417426,28418396,28419637,28419834,28421257,	28415594,28417272,28417615,28418502,28419750,28419936,28422700,	potentially_novel_isoform
mmu_circ_020787	chr1_30532125_30537666_F	circRNA	Yes	chr1	30532125	30537666	+	520	5541	3	0,2902,5396	154,221,145	ENSMMUT00000032572	chr1:30525701-30532125|chr1:30537666-30540842	2	0	chr1	+	30523704	30545162	ENSMMUT00000032572	7	30523704,30525640,30532125,30535027,30537521,30540842,30543724,	30523783,30525701,30532279,30535248,30537666,30540907,30545162,	complete_match	ENSMMUG00000006933	30523705	30545162	30523705	30545297	+	PPP1R8-201	PPP1R8	protein_coding	protein_coding	ENSMMUP00000040476	XM_001112323	XP_001112323	Uncharacterized protein [Source:UniProtKB/TrEMBL;Acc:F7E1S7]
mmu_circ_020789	chr1_30710981_30743032_R	circRNA	Yes	chr1	30710981	30743032	-	567	32051	6	0,7701,10988,15054,20493,31950	138,137,67,80,44,101	ENSMMUT00000018185	chr1:30699880-30710981|chr1:30743032-30771496	2	0	chr1	-	30656870	30771570	ENSMMUT00000018185	18	30656870,30660458,30670587,30671749,30675449,30679347,30682318,30686723,30693483,30695623,30699794,30710981,30718682,30721969,30726035,30731474,30742931,30771496,	30656951,30660559,30670709,30671864,30675610,30679406,30682408,30686807,30693623,30695807,30699880,30711119,30718819,30722036,30726115,30731518,30743032,30771570,	complete_match	ENSMMUG00000012965	30656871	30771570	30656871	30771570	-	EYA3-201	EYA3	protein_coding	protein_coding	ENSMMUP00000017024	XM_001112789	XP_001112789	Uncharacterized protein [Source:UniProtKB/TrEMBL;Acc:F7GVJ0]
mmu_circ_020791	chr1_30721969_30743032_R	circRNA	Yes	chr1	30721969	30743032	-	292	21063	4	0,4066,9505,20962	67,80,44,101	ENSMMUT00000018185	chr1:30718819-30721969|chr1:30743032-30771496	2	0	chr1	-	30656870	30771570	ENSMMUT00000018185	18	30656870,30660458,30670587,30671749,30675449,30679347,30682318,30686723,30693483,30695623,30699794,30710981,30718682,30721969,30726035,30731474,30742931,30771496,	30656951,30660559,30670709,30671864,30675610,30679406,30682408,30686807,30693623,30695807,30699880,30711119,30718819,30722036,30726115,30731518,30743032,30771570,	complete_match	ENSMMUG00000012965	30656871	30771570	30656871	30771570	-	EYA3-201	EYA3	protein_coding	protein_coding	ENSMMUP00000017024	XM_001112789	XP_001112789	Uncharacterized protein [Source:UniProtKB/TrEMBL;Acc:F7GVJ0]
mmu_circ_020793	chr1_31186949_31190933_F	circRNA	Yes	chr1	31186949	31190933	+	339	3984	2	0,3830	185,154	PREDICTED.2048.3	chr1:31184514-31186949|chr1:31190933-31203885	0	2	chr1	+	31158227	31204812	PREDICTED.2048.3	10	31158227,31167853,31168994,31175555,31176252,31183916,31186949,31190779,31203885,31204489,	31158242,31168025,31169075,31175720,31176639,31184514,31187134,31190933,31203941,31204812,	potentially_novel_isoform
mmu_circ_020802	chr1_33734330_33763248_R	circRNA	Yes	chr1	33734330	33763248	-	1369	28918	8	0,1186,2383,8330,13685,14938,26048,28751	297,144,139,152,105,94,271,167	ENSMMUT00000047431	chr1:33722240-33734330|chr1:33763248-33773472	2	0	chr1	-	33700466	33773558	ENSMMUT00000047431	17	33700466,33704487,33709619,33710494,33713857,33718718,33720513,33721972,33734330,33735516,33736713,33742660,33748015,33749268,33760378,33763081,33773472,	33700932,33704680,33709741,33710620,33713995,33718847,33720643,33722240,33734627,33735660,33736852,33742812,33748120,33749362,33760649,33763248,33773558,	complete_match	ENSMMUG00000013520	33700467	33773558	33699091	33838447	-	PUM1-203	PUM1	protein_coding	protein_coding	ENSMMUP00000040465			Pumilio homolog 1 isoform 1; Uncharacterized protein [Source:UniProtKB/TrEMBL;Acc:F6Z785]
mmu_circ_020804	chr1_34085739_34095692_F	circRNA	Yes	chr1	34085739	34095692	+	179	9953	2	0,9895	121,58	PREDICTED.2209.2	chr1:34074382-34085739|chr1:34095692-34113992	0	2	chr1	+	34074301	34146094	PREDICTED.2209.2	8	34074301,34085739,34095634,34113992,34115789,34123480,34125712,34142378,	34074382,34085860,34095692,34114093,34115881,34123581,34125858,34146094,	complete_match
mmu_circ_020814	chr1_38169739_38170326_F	circRNA	Yes	chr1	38169739	38170326	+	233	587	2	0,416	62,171	PREDICTED.8415.1	chr1:38167999-38169739|chr1:38170326-38178191	1	4	chr1	+	38123072	38191094	PREDICTED.8415.1	9	38123072,38128312,38167477,38169739,38170155,38178191,38178530,38190644,38190930,	38123092,38128358,38167999,38169801,38170326,38178276,38178786,38190819,38191094,	potentially_novel_isoform
mmu_circ_020820	chr1_38267448_38275869_R	circRNA	Yes	chr1	38267448	38275869	-	543	8421	4	0,3977,6279,8333	229,133,93,88	ENSMMUT00000027836	chr1:38265890-38267448|chr1:38275869-38280403	1	2	chr1	-	38246456	38370897	ENSMMUT00000027836	21	38246456,38252548,38253745,38254406,38255636,38259594,38261285,38261773,38263027,38264947,38265766,38267448,38271425,38273727,38275781,38280403,38284315,38288146,38318923,38370257,38370805,	38246644,38252640,38253863,38254529,38255779,38259754,38261424,38261925,38263176,38265080,38265890,38267677,38271558,38273820,38275869,38280501,38284417,38288393,38319447,38370427,38370897,	complete_match	ENSMMUG00000019806	38246457	38370897	38246457	38370897	-	KIAA0319L-201	KIAA0319L	protein_coding	protein_coding	ENSMMUP00000026042		XP_001102000	KIAA0319-like [Source:HGNC Symbol;Acc:HGNC:30071]
mmu_circ_020822	chr1_38318923_38319447_R	circRNA	Yes	chr1	38318923	38319447	-	524	524	1	0	524	ENSMMUT00000027836	chr1:38288393-38318923|chr1:38319447-38370257	1	1	chr1	-	38246456	38370897	ENSMMUT00000027836	21	38246456,38252548,38253745,38254406,38255636,38259594,38261285,38261773,38263027,38264947,38265766,38267448,38271425,38273727,38275781,38280403,38284315,38288146,38318923,38370257,38370805,	38246644,38252640,38253863,38254529,38255779,38259754,38261424,38261925,38263176,38265080,38265890,38267677,38271558,38273820,38275869,38280501,38284417,38288393,38319447,38370427,38370897,	complete_match	ENSMMUG00000019806	38246457	38370897	38246457	38370897	-	KIAA0319L-201	KIAA0319L	protein_coding	protein_coding	ENSMMUP00000026042		XP_001102000	KIAA0319-like [Source:HGNC Symbol;Acc:HGNC:30071]
mmu_circ_020823	chr1_38373785_38374057_F	ciRNA	Yes	chr1	38373785	38374057	+	272	272	1	0	272	PREDICTED.2358.1	chr1:38373785-38374057	0	2	chr1	+	38373704	38377336	PREDICTED.2358.1	4	38373704,38374057,38375127,38376356,	38373785,38374125,38375268,38377336,	potentially_novel_isoform
mmu_circ_020826	chr1_38669315_38671264_F	circRNA	Yes	chr1	38669315	38671264	+	345	1949	2	0,1789	185,160	PREDICTED.7744.1	chr1:38667903-38669315|chr1:38671264-38676333	2	0	chr1	+	38641631	38693926	PREDICTED.7744.1	18	38641631,38651515,38658094,38660728,38661095,38661342,38662168,38666764,38667149,38667394,38667857,38669315,38671104,38676333,38676784,38687217,38687893,38690188,	38641846,38651681,38658215,38660910,38661232,38661477,38662256,38666912,38667269,38667487,38667903,38669500,38671264,38676649,38676919,38687319,38688093,38693926,	potentially_novel_isoform
mmu_circ_020832	chr1_40432571_40433023_R	circRNA	Yes	chr1	40432571	40433023	-	452	452	1	0	452	PREDICTED.2564.1	chr1:40432077-40432571|chr1:40433023-40438392	0	2	chr1	-	40430567	40457542	PREDICTED.2564.1	17	40430567,40431393,40431994,40432571,40438392,40438714,40439649,40439985,40440109,40440524,40446245,40446796,40447886,40451969,40455049,40457065,40457448,	40430728,40431485,40432077,40433023,40438506,40438873,40439754,40440064,40440135,40440551,40446359,40446955,40447953,40452154,40455189,40457160,40457542,	potentially_novel_isoform
mmu_circ_020834	chr1_40735458_40740227_R	circRNA	Yes	chr1	40735458	40740227	-	439	4769	4	0,1540,2285,4655	112,128,85,114	PREDICTED.2585.2	chr1:40733463-40735458|chr1:40740227-40745001	0	4	chr1	-	40733156	40759421	PREDICTED.2585.2	13	40733156,40735458,40736998,40737743,40740113,40745001,40746065,40747985,40751000,40753072,40756135,40756995,40759289,	40733463,40735570,40737126,40737828,40740227,40745237,40746228,40748096,40751136,40753182,40756247,40757062,40759421,	potentially_novel_isoform
mmu_circ_020837	chr1_40859837_40860450_R	circRNA	Yes	chr1	40859837	40860450	-	165	613	2	0,540	92,73	PREDICTED.2555.1	chr1:40859678-40859837|chr1:40860450-40863552	1	1	chr1	-	40834567	40866015	PREDICTED.2555.1	23	40834567,40837172,40844951,40846261,40846484,40846743,40846875,40853328,40853599,40854076,40854516,40855064,40855195,40855826,40856327,40859299,40859648,40859837,40860377,40863552,40863760,40865515,40865866,	40835308,40837228,40845042,40846372,40846649,40846763,40846925,40853436,40853667,40854145,40854556,40855112,40855249,40855832,40856347,40859338,40859678,40859929,40860450,40863658,40863813,40865563,40866015,	complete_match
mmu_circ_020838	chr1_40874058_40874245_R	circRNA	Yes	chr1	40874058	40874245	-	187	187	1	0	187	ENSMMUT00000032638	chr1:40873934-40874058|chr1:40874245-40874337	2	0	chr1	-	40873779	40875783	ENSMMUT00000032638	5	40873779,40874058,40874337,40875344,40875627,	40873934,40874245,40874507,40875519,40875783,	complete_match	ENSMMUG00000023200	40873780	40875783	40873780	40875783	-	FHL3-201	FHL3	protein_coding	protein_coding	ENSMMUP00000030540	XM_001112977	XP_001112977	Four and a half LIM domains protein 3; Uncharacterized protein [Source:UniProtKB/TrEMBL;Acc:F7EEL7]
mmu_circ_020840	chr1_42166283_42171335_F	circRNA	Yes	chr1	42166283	42171335	+	480	5052	4	0,740,2326,4899	105,96,126,153	PREDICTED.12189.1	chr1:42164611-42166283|chr1:42171335-42173518	2	0	chr1	+	41955772	42187489	PREDICTED.12189.1	29	41955772,42104739,42120879,42125160,42141633,42141930,42153165,42153224,42154214,42154434,42155091,42155358,42156101,42156315,42156616,42158312,42162898,42163761,42164449,42166283,42167023,42168609,42171182,42173518,42179913,42180589,42181178,42185826,42186704,	41956044,42104801,42120969,42125238,42141650,42141966,42153205,42153391,42154327,42154541,42155211,42155454,42156229,42156409,42156771,42158589,42163027,42163839,42164611,42166388,42167119,42168735,42171335,42173673,42180040,42180773,42181348,42186005,42187489,	potentially_novel_isoform
mmu_circ_020846	chr1_42256485_42259710_F	circRNA	Yes	chr1	42256485	42259710	+	1968	3225	2	0,1753	496,1472	PREDICTED.3011.2	chr1:42253069-42256485|chr1:42259710-42293482	0	2	chr1	+	42188806	42359649	PREDICTED.3011.2	52	42188806,42190307,42193191,42193493,42194940,42195393,42195996,42197514,42197900,42201744,42252869,42256485,42258238,42293482,42293838,42294858,42298848,42299348,42300627,42302149,42303029,42304871,42305411,42306565,42307701,42309970,42311473,42312762,42312983,42313710,42313905,42314467,42315208,42316127,42318893,42319153,42319494,42320054,42322522,42323599,42324127,42325141,42326346,42331133,423…	42188971,42190391,42193299,42193592,42195093,42195482,42196051,42197544,42197954,42206714,42253069,42256981,42259710,42293644,42294009,42295025,42299008,42299675,42300712,42302391,42303236,42304991,42305519,42306784,42307909,42310207,42311700,42312885,42313085,42313812,42314326,42314665,42315337,42316301,42319049,42319360,42319614,42320224,42322682,42323794,42324256,42325285,42326535,42331254,423…	potentially_novel_isoform
mmu_circ_020847	chr1_42293482_42295025_F	circRNA	Yes	chr1	42293482	42295025	+	500	1543	3	0,356,1376	162,171,167	ENSMMUT00000013356	chr1:42259710-42293482|chr1:42295025-42298848	2	0	chr1	+	42206662	42359873	ENSMMUT00000013356	44	42206662,42252869,42256485,42258238,42293482,42293838,42294858,42298848,42299348,42300627,42302149,42303029,42304871,42305411,42306565,42307701,42309970,42311473,42312762,42312983,42313710,42313905,42314170,42314467,42315208,42316127,42318893,42319153,42319494,42320054,42322522,42323599,42324127,42325141,42326346,42331133,42331845,42333405,42334612,42336638,42341310,42354061,42358682,42359619,	42206714,42253069,42256981,42259710,42293644,42294009,42295025,42299008,42299675,42300712,42302391,42303236,42304991,42305519,42306784,42307909,42310207,42311700,42312885,42313085,42313812,42314079,42314326,42314665,42315337,42316301,42319049,42319360,42319614,42320224,42322682,42323794,42324256,42325285,42326535,42331254,42332009,42333568,42334767,42336713,42341446,42354273,42358812,42359873,	complete_match	ENSMMUG00000009562	42206663	42359873	42206663	42360145	+			protein_coding	protein_coding	ENSMMUP00000012513	XM_002802332	XP_002802378	Uncharacterized protein [Source:UniProtKB/TrEMBL;Acc:F6X516]
mmu_circ_020856	chr1_42948368_42959767_R	circRNA	Yes	chr1	42948368	42959767	-	503	11399	5	0,8333,10222,10936,11289	91,103,71,128,110	PREDICTED.2961.1	chr1:42946611-42948368|chr1:42959767-42966203	3	0	chr1	-	42940687	42966350	PREDICTED.2961.1	9	42940687,42944809,42946512,42948368,42956701,42958590,42959304,42959657,42966203,	42942287,42944881,42946611,42948459,42956804,42958661,42959432,42959767,42966350,	complete_match
mmu_circ_020863	chr1_43920406_43920633_R	ciRNA	Yes	chr1	43920406	43920633	-	227	227	1	0	227	ENSMMUT00000024049	chr1:43920368-43920633	3	1	chr1	-	43919278	44065525	ENSMMUT00000024049	15	43919278,43920633,43926084,43929112,43938180,43940487,43961735,43966313,44027531,44031517,44047419,44055958,44056935,44064348,44065497,	43920368,43920776,43926150,43929292,43938372,43940688,43961862,43966546,44027775,44031606,44047653,44056029,44057078,44064555,44065525,	complete_match	ENSMMUG00000017104	43919279	44065525	43919279	44066059	-	SCMH1-201	SCMH1	protein_coding	protein_coding	ENSMMUP00000022506	XM_002808212	XP_002808258	Uncharacterized protein [Source:UniProtKB/TrEMBL;Acc:F7FR92]
mmu_circ_020864	chr1_44027531_44047653_R	circRNA	Yes	chr1	44027531	44047653	-	567	20122	3	0,3986,19888	244,89,234	ENSMMUT00000024049	chr1:43966546-44027531|chr1:44047653-44055958	1	1	chr1	-	43919278	44065525	ENSMMUT00000024049	15	43919278,43920633,43926084,43929112,43938180,43940487,43961735,43966313,44027531,44031517,44047419,44055958,44056935,44064348,44065497,	43920368,43920776,43926150,43929292,43938372,43940688,43961862,43966546,44027775,44031606,44047653,44056029,44057078,44064555,44065525,	complete_match	ENSMMUG00000017104	43919279	44065525	43919279	44066059	-	SCMH1-201	SCMH1	protein_coding	protein_coding	ENSMMUP00000022506	XM_002808212	XP_002808258	Uncharacterized protein [Source:UniProtKB/TrEMBL;Acc:F7FR92]
mmu_circ_020866	chr1_45089113_45170381_R	circRNA	Yes	chr1	45089113	45170381	-	1601	81268	9	0,563,2576,6173,10366,17618,39400,69027,80943	192,102,417,175,129,102,84,75,325	PREDICTED.3248.1	chr1:45083086-45089113|chr1:45170381-45204525	3	0	chr1	-	45077760	45228668	PREDICTED.3248.1	13	45077760,45082978,45089113,45089676,45091689,45095286,45099479,45106731,45128513,45158140,45170056,45204525,45228512,	45081027,45083086,45089305,45089778,45092106,45095461,45099608,45106833,45128597,45158215,45170381,45204586,45228668,	potentially_novel_isoform
mmu_circ_020869	chr1_46218474_46220232_F	circRNA	Yes	chr1	46218474	46220232	+	267	1758	2	0,1602	111,156	PREDICTED.9568.3	chr1:46218407-46218474|chr1:46220232-46220384	4	0	chr1	+	46217862	46221565	PREDICTED.9568.3	6	46217862,46218474,46220076,46220384,46220674,46221026,	46218407,46218585,46220232,46220516,46220815,46221565,	potentially_novel_isoform
mmu_circ_020873	chr1_46822174_46823975_F	circRNA	Yes	chr1	46822174	46823975	+	347	1801	3	0,1243,1614	64,96,187	ENSMMUT00000047316	chr1:46818067-46822174|chr1:46823975-46843776	2	0	chr1	+	46621029	46854853	ENSMMUT00000047316	12	46621029,46653210,46711665,46734951,46757660,46817972,46822174,46823417,46823788,46843776,46844154,46853830,	46621174,46653358,46711713,46734994,46757753,46818067,46822238,46823513,46823975,46843923,46844301,46854853,	complete_match	ENSMMUG00000015555	46621030	46854853	46621028	46854853	+	ST3GAL3-202	ST3GAL3	protein_coding	protein_coding	ENSMMUP00000040344	XM_001091910	XP_001091910	Uncharacterized protein [Source:UniProtKB/TrEMBL;Acc:F6Q803]
mmu_circ_020874	chr1_46843776_46844301_F	circRNA	Yes	chr1	46843776	46844301	+	294	525	2	0,378	147,147	ENSMMUT00000047316	chr1:46823975-46843776|chr1:46844301-46853830	2	2	chr1	+	46621029	46854853	ENSMMUT00000047316	12	46621029,46653210,46711665,46734951,46757660,46817972,46822174,46823417,46823788,46843776,46844154,46853830,	46621174,46653358,46711713,46734994,46757753,46818067,46822238,46823513,46823975,46843923,46844301,46854853,	complete_match	ENSMMUG00000015555	46621030	46854853	46621028	46854853	+	ST3GAL3-202	ST3GAL3	protein_coding	protein_coding	ENSMMUP00000040344	XM_001091910	XP_001091910	Uncharacterized protein [Source:UniProtKB/TrEMBL;Acc:F6Q803]
mmu_circ_020875	chr1_46884193_46885202_F	circRNA	Yes	chr1	46884193	46885202	+	316	1009	3	0,622,912	81,138,97	ENSMMUT00000021235	chr1:46882855-46884193|chr1:46885202-46888210	0	2	chr1	+	46870856	46891951	ENSMMUT00000021235	20	46870856,46873332,46880274,46880522,46880772,46881159,46881366,46881940,46882206,46882427,46882711,46884193,46884815,46885105,46888210,46890511,46890660,46890866,46891247,46891518,	46871591,46874069,46880415,46880664,46880939,46881280,46881514,46882122,46882233,46882562,46882855,46884274,46884953,46885202,46888263,46890578,46890719,46890956,46891429,46891951,	complete_match	ENSMMUG00000015142	46870857	46891951	46870857	46891951	+	IPO13-201	IPO13	protein_coding	protein_coding	ENSMMUP00000019856			Uncharacterized protein [Source:UniProtKB/TrEMBL;Acc:F6UE53]
mmu_circ_020880	chr1_47238441_47264723_R	circRNA	Yes	chr1	47238441	47264723	-	455	26282	3	0,6423,26004	60,117,278	ENSMMUT00000016325	chr1:47233947-47238441|chr1:47264723-47278462	0	2	chr1	-	47145634	47280866	ENSMMUT00000016325	9	47145634,47172637,47210124,47233855,47238441,47244864,47264445,47278462,47280503,	47146205,47172737,47210197,47233947,47238501,47244981,47264723,47278538,47280866,	complete_match	ENSMMUG00000011651	47145635	47280866	47145635	47280884	-	ERI3-201	ERI3	protein_coding	protein_coding	ENSMMUP00000015296	XM_002801517	XP_001093178	ERI1 exoribonuclease 3; Uncharacterized protein [Source:UniProtKB/TrEMBL;Acc:F6PT31]
mmu_circ_020885	chr1_48335361_48374610_R	circRNA	Yes	chr1	48335361	48374610	-	430	39249	2	0,38941	122,308	PREDICTED.10033.6	chr1:48316124-48335361|chr1:48374610-48378215	3	3	chr1	-	48261973	48378708	PREDICTED.10033.6	8	48261973,48263016,48263312,48271169,48316120,48335361,48374302,48378215,	48262434,48263101,48263395,48271316,48316124,48335483,48374610,48378708,	potentially_novel_isoform
mmu_circ_020886	chr1_4833948_4836388_R	circRNA	Yes	chr1	4833948	4836388	-	227	2440	2	0,2376	163,64	ENSMMUT00000002674	chr1:4822038-4833948|chr1:4836388-4846316	4	2	chr1	-	4813496	4871200	ENSMMUT00000002674	11	4813496,4815518,4817260,4818604,4821971,4833948,4836324,4846316,4848707,4856078,4871147,	4815250,4815634,4817477,4818806,4822038,4834111,4836388,4846423,4848746,4856181,4871200,	complete_match	ENSMMUG00000001896	4813497	4871200	4813493	4871200	-	GNB1-202	GNB1	protein_coding	protein_coding	ENSMMUP00000002526		XP_001096520	Guanine nucleotide-binding protein G(I)/G(S)/G(T) subunit beta-1; Uncharacterized protein [Source:UniProtKB/TrEMBL;Acc:F7FXA9]
mmu_circ_020887	chr1_4833948_4871196_R	circRNA	Yes	chr1	4833948	4871196	-	525	37248	6	0,2376,12368,14759,22130,37199	163,64,107,39,103,49	PREDICTED.1126.3	chr1:4822038-4833948|chr1:4871196-4895300	6	0	chr1	-	4813995	4895347	PREDICTED.1126.3	12	4813995,4815518,4817260,4818604,4821971,4833948,4836324,4846316,4848707,4856078,4871147,4895300,	4815250,4815634,4817477,4818806,4822038,4834111,4836388,4846423,4848746,4856181,4871196,4895347,	potentially_novel_isoform
mmu_circ_020888	chr1_4836324_4848746_R	circRNA	Yes	chr1	4836324	4848746	-	210	12422	3	0,9992,12383	64,107,39	ENSMMUT00000002674	chr1:4834111-4836324|chr1:4848746-4856078	2	0	chr1	-	4813496	4871200	ENSMMUT00000002674	11	4813496,4815518,4817260,4818604,4821971,4833948,4836324,4846316,4848707,4856078,4871147,	4815250,4815634,4817477,4818806,4822038,4834111,4836388,4846423,4848746,4856181,4871200,	complete_match	ENSMMUG00000001896	4813497	4871200	4813493	4871200	-	GNB1-202	GNB1	protein_coding	protein_coding	ENSMMUP00000002526		XP_001096520	Guanine nucleotide-binding protein G(I)/G(S)/G(T) subunit beta-1; Uncharacterized protein [Source:UniProtKB/TrEMBL;Acc:F7FXA9]
mmu_circ_020890	chr1_48374302_48374610_R	circRNA	Yes	chr1	48374302	48374610	-	308	308	1	0	308	PREDICTED.10033.6	chr1:48335483-48374302|chr1:48374610-48378215	2	0	chr1	-	48261973	48378708	PREDICTED.10033.6	8	48261973,48263016,48263312,48271169,48316120,48335361,48374302,48378215,	48262434,48263101,48263395,48271316,48316124,48335483,48374610,48378708,	potentially_novel_isoform
mmu_circ_020892	chr1_4846316_4871196_R	circRNA	Yes	chr1	4846316	4871196	-	298	24880	4	0,2391,9762,24831	107,39,103,49	PREDICTED.1126.3	chr1:4836388-4846316|chr1:4871196-4895300	13	0	chr1	-	4813995	4895347	PREDICTED.1126.3	12	4813995,4815518,4817260,4818604,4821971,4833948,4836324,4846316,4848707,4856078,4871147,4895300,	4815250,4815634,4817477,4818806,4822038,4834111,4836388,4846423,4848746,4856181,4871196,4895347,	potentially_novel_isoform
mmu_circ_020895	chr1_4856078_4871196_R	circRNA	Yes	chr1	4856078	4871196	-	152	15118	2	0,15069	103,49	PREDICTED.1126.3	chr1:4848746-4856078|chr1:4871196-4895300	8	0	chr1	-	4813995	4895347	PREDICTED.1126.3	12	4813995,4815518,4817260,4818604,4821971,4833948,4836324,4846316,4848707,4856078,4871147,4895300,	4815250,4815634,4817477,4818806,4822038,4834111,4836388,4846423,4848746,4856181,4871196,4895347,	potentially_novel_isoform
mmu_circ_020897	chr1_48966027_48966490_F	circRNA	Yes	chr1	48966027	48966490	+	331	463	2	0,269	137,194	PREDICTED.11890.2	chr1:48965129-48966027|chr1:48966490-48966760	4	0	chr1	+	48711463	48971154	PREDICTED.11890.2	27	48711463,48740186,48745480,48821540,48897524,48932440,48941024,48943114,48945521,48951440,48953792,48954739,48955597,48957502,48959826,48960875,48961550,48962254,48962553,48963018,48963419,48963802,48964588,48965006,48966027,48966296,48966760,	48711921,48740334,48745595,48821572,48897616,48937261,48941179,48943190,48945731,48951542,48953925,48955146,48955806,48957641,48959959,48961041,48961652,48962377,48962663,48963173,48963703,48963997,48964815,48965129,48966164,48966490,48971154,	potentially_novel_isoform
mmu_circ_020905	chr1_51251229_51255447_R	circRNA	Yes	chr1	51251229	51255447	-	285	4218	2	0,4033	100,185	PREDICTED.10880.1	chr1:51196815-51251229|chr1:51255447-51271939	3	0	chr1	-	51185964	51340339	PREDICTED.10880.1	12	51185964,51196720,51251229,51255262,51271939,51281898,51286623,51291335,51299297,51300945,51338441,51339892,	51187740,51196815,51251329,51255447,51271980,51281986,51286917,51291416,51299422,51300987,51338490,51340339,	potentially_novel_isoform
mmu_circ_020906	chr1_51251229_51271980_R	circRNA	Yes	chr1	51251229	51271980	-	326	20751	3	0,4033,20710	100,185,41	PREDICTED.10880.1	chr1:51196815-51251229|chr1:51271980-51281898	2	0	chr1	-	51185964	51340339	PREDICTED.10880.1	12	51185964,51196720,51251229,51255262,51271939,51281898,51286623,51291335,51299297,51300945,51338441,51339892,	51187740,51196815,51251329,51255447,51271980,51281986,51286917,51291416,51299422,51300987,51338490,51340339,	potentially_novel_isoform
mmu_circ_020911	chr1_54222886_54223048_R	circRNA	Yes	chr1	54222886	54223048	-	162	162	1	0	162	PREDICTED.11196.1	chr1:54221685-54222886|chr1:54223048-54236529	2	0	chr1	-	54181392	54303571	PREDICTED.11196.1	24	54181392,54186777,54189463,54191560,54207609,54212302,54214205,54215712,54216698,54219146,54221487,54222886,54236529,54256257,54260427,54262500,54263484,54281228,54283798,54286641,54290176,54293746,54294914,54303520,	54182540,54186965,54189626,54191637,54207676,54212436,54214241,54215803,54216812,54219350,54221685,54223048,54236602,54256343,54260584,54262646,54263685,54281288,54283917,54286711,54290272,54293794,54295004,54303571,	potentially_novel_isoform
mmu_circ_020912	chr1_54281228_54295004_R	circRNA	Yes	chr1	54281228	54295004	-	483	13776	6	0,2570,5413,8948,12518,13686	60,119,70,96,48,90	PREDICTED.11196.1	chr1:54263685-54281228|chr1:54295004-54303520	4	3	chr1	-	54181392	54303571	PREDICTED.11196.1	24	54181392,54186777,54189463,54191560,54207609,54212302,54214205,54215712,54216698,54219146,54221487,54222886,54236529,54256257,54260427,54262500,54263484,54281228,54283798,54286641,54290176,54293746,54294914,54303520,	54182540,54186965,54189626,54191637,54207676,54212436,54214241,54215803,54216812,54219350,54221685,54223048,54236602,54256343,54260584,54262646,54263685,54281288,54283917,54286711,54290272,54293794,54295004,54303571,	potentially_novel_isoform
mmu_circ_020916	chr1_54623856_54634336_R	circRNA	Yes	chr1	54623856	54634336	-	754	10480	8	0,1089,4853,5831,7555,9714,10216,10359	151,52,87,124,105,55,59,121	PREDICTED.11324.5	chr1:54620793-54623856|chr1:54634336-54635838	3	0	chr1	-	54610250	54709491	PREDICTED.11324.5	27	54610250,54611239,54611857,54612306,54612608,54614686,54618327,54620665,54623856,54624945,54628709,54629687,54631411,54633570,54634072,54634215,54635838,54637579,54639320,54641026,54643498,54645121,54649343,54655891,54657973,54662462,54709477,	54610988,54611330,54611941,54612359,54612656,54615068,54618490,54620793,54624007,54624997,54628796,54629811,54631516,54633625,54634131,54634336,54635916,54637649,54639394,54641084,54643621,54645217,54649417,54656045,54658055,54662751,54709491,	potentially_novel_isoform
mmu_circ_020921	chr1_55265696_55269999_R	circRNA	Yes	chr1	55265696	55269999	-	549	4303	2	0,4202	448,101	ENSMMUT00000023933	chr1:55260298-55265696|chr1:55269999-55270699	3	0	chr1	-	55258224	55360586	ENSMMUT00000023933	29	55258224,55260139,55265696,55269898,55270699,55272157,55279080,55279250,55279564,55279881,55292909,55295783,55296168,55296365,55299406,55302508,55306246,55309311,55312394,55316113,55316515,55323970,55325769,55328951,55330767,55332361,55344609,55351471,55359871,	55258950,55260298,55266144,55269999,55270923,55272273,55279163,55279298,55279742,55279959,55293023,55295873,55296272,55296423,55299510,55302595,55306397,55310015,55312569,55316326,55316635,55324097,55325839,55329003,55330856,55332539,55344726,55351635,55360586,	complete_match	ENSMMUG00000017023	55258225	55360586	55258225	55388577	-	ZCCHC11-201	ZCCHC11	protein_coding	protein_coding	ENSMMUP00000022403	XM_001111993	XP_001111993	zinc finger, CCHC domain containing 11 [Source:HGNC Symbol;Acc:HGNC:28981]
mmu_circ_020924	chr1_55325769_55344726_R	circRNA	Yes	chr1	55325769	55344726	-	506	18957	5	0,3182,4998,6592,18840	70,52,89,178,117	ENSMMUT00000023933	chr1:55324097-55325769|chr1:55344726-55351471	2	0	chr1	-	55258224	55360586	ENSMMUT00000023933	29	55258224,55260139,55265696,55269898,55270699,55272157,55279080,55279250,55279564,55279881,55292909,55295783,55296168,55296365,55299406,55302508,55306246,55309311,55312394,55316113,55316515,55323970,55325769,55328951,55330767,55332361,55344609,55351471,55359871,	55258950,55260298,55266144,55269999,55270923,55272273,55279163,55279298,55279742,55279959,55293023,55295873,55296272,55296423,55299510,55302595,55306397,55310015,55312569,55316326,55316635,55324097,55325839,55329003,55330856,55332539,55344726,55351635,55360586,	complete_match	ENSMMUG00000017023	55258225	55360586	55258225	55388577	-	ZCCHC11-201	ZCCHC11	protein_coding	protein_coding	ENSMMUP00000022403	XM_001111993	XP_001111993	zinc finger, CCHC domain containing 11 [Source:HGNC Symbol;Acc:HGNC:28981]
mmu_circ_020928	chr1_55851744_55875147_F	circRNA	Yes	chr1	55851744	55875147	+	685	23403	6	0,10243,12156,14006,16212,23295	127,64,87,151,148,108	PREDICTED.11581.4	chr1:55841771-55851744|chr1:55875147-55898820	2	0	chr1	+	55831327	55929357	PREDICTED.11581.4	15	55831327,55838704,55841428,55841673,55841767,55851744,55861987,55863900,55865750,55867956,55875039,55898820,55909628,55918910,55927965,	55831385,55838776,55841567,55841727,55841771,55851871,55862051,55863987,55865901,55868104,55875147,55898974,55909731,55919040,55929357,	potentially_novel_isoform
mmu_circ_020934	chr1_57957229_57957421_R	circRNA	Yes	chr1	57957229	57957421	-	192	192	1	0	192	PREDICTED.12912.1	chr1:57955952-57957229|chr1:57957421-57960223	2	1	chr1	-	57915224	58063436	PREDICTED.12912.1	74	57915224,57920919,57921422,57921899,57923244,57924816,57926581,57927893,57928890,57931076,57933022,57933522,57935688,57939377,57941749,57942537,57943648,57944987,57946224,57946678,57947339,57947685,57948208,57949513,57950586,57951323,57953595,57955819,57957229,57960223,57969985,57970836,57972834,57973840,57974696,57975039,57978108,57981168,57982704,57982964,57986311,57986593,57987397,57987721,579…	57918231,57921030,57921509,57921975,57923323,57924883,57926647,57928007,57929012,57931179,57933115,57933639,57935785,57939491,57941853,57942633,57943799,57945129,57946349,57946899,57947459,57947827,57948291,57949612,57950712,57951443,57953734,57955952,57957421,57960285,57970146,57970907,57972990,57974000,57974925,57975135,57978206,57981324,57982798,57983050,57986485,57986692,57987508,57987788,579…	potentially_novel_isoform
mmu_circ_020938	chr1_59379783_59392448_R	circRNA	Yes	chr1	59379783	59392448	-	513	12665	4	0,6113,8151,12387	177,12,46,278	ENSMMUT00000003114	chr1:59364327-59379783|chr1:59392448-59404709	2	0	chr1	-	59362441	59445903	ENSMMUT00000003114	7	59362441,59379783,59385896,59387934,59392170,59404709,59445764,	59364327,59379960,59385908,59387980,59392448,59404867,59445903,	complete_match	ENSMMUG00000002200	59362442	59445903	59362442	59445903	-	PPAP2B-201	PPAP2B	protein_coding	protein_coding	ENSMMUP00000002940		XP_001114366	phosphatidic acid phosphatase type 2B [Source:HGNC Symbol;Acc:HGNC:9229]
mmu_circ_020941	chr1_61528716_61536148_R	circRNA	Yes	chr1	61528716	61536148	-	991	7432	3	0,4582,7333	131,761,99	PREDICTED.13038.1	chr1:61527374-61528716|chr1:61536148-61539893	3	0	chr1	-	61507532	61542368	PREDICTED.13038.1	16	61507532,61512717,61512953,61517026,61518575,61519386,61520168,61520512,61523429,61525099,61527270,61528716,61533298,61536049,61539893,61541115,	61511696,61512775,61513059,61517159,61518764,61519461,61520219,61520567,61523518,61525177,61527374,61528847,61534059,61536148,61539972,61542368,	potentially_novel_isoform
mmu_circ_020951	chr1_65052580_65057810_R	circRNA	Yes	chr1	65052580	65057810	-	344	5230	2	0,5087	201,143	ENSMMUT00000014472	chr1:65043255-65052580|chr1:65057810-65069199	3	0	chr1	-	65042012	65082559	ENSMMUT00000014472	9	65042012,65042274,65052580,65057667,65069199,65073744,65075777,65078942,65080680,	65042239,65043255,65052781,65057810,65069419,65073832,65075996,65079054,65082559,	complete_match	ENSMMUG00000010351	65042013	65082559	65042013	65132337	-	KANK4-202	KANK4	protein_coding	protein_coding	ENSMMUP00000013557	XM_001084958	XP_001084958	KN motif and ankyrin repeat domains 4 [Source:HGNC Symbol;Acc:HGNC:27263]
mmu_circ_020954	chr1_65312956_65316340_R	circRNA	Yes	chr1	65312956	65316340	-	385	3384	3	0,1045,3287	153,135,97	ENSMMUT00000003321	chr1:65307471-65312956|chr1:65316340-65318967	5	0	chr1	-	65265816	65460045	ENSMMUT00000003321	45	65265816,65268636,65285319,65286558,65287055,65287411,65289044,65299966,65303656,65305231,65306554,65307312,65312956,65314001,65316243,65318967,65322541,65322784,65341404,65342537,65349319,65351686,65353852,65354056,65356876,65357919,65367288,65370317,65373427,65375984,65383647,65385554,65389724,65393053,65425900,65427106,65431851,65438151,65440361,65441658,65443285,65455039,65455458,65455771,654…	65266258,65268804,65285426,65286702,65287292,65287501,65289179,65300098,65303800,65305424,65306655,65307471,65313109,65314136,65316340,65319064,65322677,65322967,65341559,65342707,65349459,65351857,65353966,65354197,65356972,65358009,65367458,65370482,65373659,65376071,65383749,65385693,65389795,65393171,65426063,65427200,65431994,65438317,65440442,65441808,65443352,65455125,65455671,65455901,654…	complete_match	ENSMMUG00000002340	65265817	65460045	65265817	65460422	-	DOCK7-201	DOCK7	protein_coding	protein_coding	ENSMMUP00000003136			dedicator of cytokinesis 7 [Source:HGNC Symbol;Acc:HGNC:19190]
mmu_circ_020956	chr1_65367288_65376071_R	circRNA	Yes	chr1	65367288	65376071	-	654	8783	4	0,3029,6139,8696	170,165,232,87	ENSMMUT00000003321	chr1:65358009-65367288|chr1:65376071-65383647	5	0	chr1	-	65265816	65460045	ENSMMUT00000003321	45	65265816,65268636,65285319,65286558,65287055,65287411,65289044,65299966,65303656,65305231,65306554,65307312,65312956,65314001,65316243,65318967,65322541,65322784,65341404,65342537,65349319,65351686,65353852,65354056,65356876,65357919,65367288,65370317,65373427,65375984,65383647,65385554,65389724,65393053,65425900,65427106,65431851,65438151,65440361,65441658,65443285,65455039,65455458,65455771,654…	65266258,65268804,65285426,65286702,65287292,65287501,65289179,65300098,65303800,65305424,65306655,65307471,65313109,65314136,65316340,65319064,65322677,65322967,65341559,65342707,65349459,65351857,65353966,65354197,65356972,65358009,65367458,65370482,65373659,65376071,65383749,65385693,65389795,65393171,65426063,65427200,65431994,65438317,65440442,65441808,65443352,65455125,65455671,65455901,654…	complete_match	ENSMMUG00000002340	65265817	65460045	65265817	65460422	-	DOCK7-201	DOCK7	protein_coding	protein_coding	ENSMMUP00000003136			dedicator of cytokinesis 7 [Source:HGNC Symbol;Acc:HGNC:19190]
mmu_circ_020957	chr1_65367288_65385693_R	circRNA	Yes	chr1	65367288	65385693	-	895	18405	6	0,3029,6139,8696,16359,18266	170,165,232,87,102,139	ENSMMUT00000003321	chr1:65358009-65367288|chr1:65385693-65389724	2	0	chr1	-	65265816	65460045	ENSMMUT00000003321	45	65265816,65268636,65285319,65286558,65287055,65287411,65289044,65299966,65303656,65305231,65306554,65307312,65312956,65314001,65316243,65318967,65322541,65322784,65341404,65342537,65349319,65351686,65353852,65354056,65356876,65357919,65367288,65370317,65373427,65375984,65383647,65385554,65389724,65393053,65425900,65427106,65431851,65438151,65440361,65441658,65443285,65455039,65455458,65455771,654…	65266258,65268804,65285426,65286702,65287292,65287501,65289179,65300098,65303800,65305424,65306655,65307471,65313109,65314136,65316340,65319064,65322677,65322967,65341559,65342707,65349459,65351857,65353966,65354197,65356972,65358009,65367458,65370482,65373659,65376071,65383749,65385693,65389795,65393171,65426063,65427200,65431994,65438317,65440442,65441808,65443352,65455125,65455671,65455901,654…	complete_match	ENSMMUG00000002340	65265817	65460045	65265817	65460422	-	DOCK7-201	DOCK7	protein_coding	protein_coding	ENSMMUP00000003136			dedicator of cytokinesis 7 [Source:HGNC Symbol;Acc:HGNC:19190]
mmu_circ_020960	chr1_65383647_65427200_R	circRNA	Yes	chr1	65383647	65427200	-	687	43553	6	0,1907,6077,9406,42253,43459	102,139,71,118,163,94	ENSMMUT00000003321	chr1:65376071-65383647|chr1:65427200-65431851	0	2	chr1	-	65265816	65460045	ENSMMUT00000003321	45	65265816,65268636,65285319,65286558,65287055,65287411,65289044,65299966,65303656,65305231,65306554,65307312,65312956,65314001,65316243,65318967,65322541,65322784,65341404,65342537,65349319,65351686,65353852,65354056,65356876,65357919,65367288,65370317,65373427,65375984,65383647,65385554,65389724,65393053,65425900,65427106,65431851,65438151,65440361,65441658,65443285,65455039,65455458,65455771,654…	65266258,65268804,65285426,65286702,65287292,65287501,65289179,65300098,65303800,65305424,65306655,65307471,65313109,65314136,65316340,65319064,65322677,65322967,65341559,65342707,65349459,65351857,65353966,65354197,65356972,65358009,65367458,65370482,65373659,65376071,65383749,65385693,65389795,65393171,65426063,65427200,65431994,65438317,65440442,65441808,65443352,65455125,65455671,65455901,654…	complete_match	ENSMMUG00000002340	65265817	65460045	65265817	65460422	-	DOCK7-201	DOCK7	protein_coding	protein_coding	ENSMMUP00000003136			dedicator of cytokinesis 7 [Source:HGNC Symbol;Acc:HGNC:19190]
mmu_circ_020961	chr1_65594036_65625681_F	circRNA	Yes	chr1	65594036	65625681	+	1020	31645	7	0,1168,12471,15112,17877,30830,31568	144,84,234,331,71,79,77	PREDICTED.13617.1	chr1:65574616-65594036|chr1:65625681-65632543	3	1	chr1	+	65574104	65632838	PREDICTED.13617.1	9	65574104,65594036,65595204,65606507,65609148,65611913,65624866,65625604,65632543,	65574616,65594180,65595288,65606741,65609479,65611984,65624945,65625681,65632838,	potentially_novel_isoform
mmu_circ_020962	chr1_65619555_65632663_F	circRNA	Yes	chr1	65619555	65632663	+	413	13108	4	0,5311,6049,12988	137,79,77,120	ENSMMUT00000000560	chr1:65611984-65619555|chr1:65632663-65655670	3	0	chr1	+	65574477	65656828	ENSMMUT00000000560	11	65574477,65594036,65595204,65606507,65609148,65611913,65619555,65624866,65625604,65632543,65655670,	65574616,65594180,65595288,65606741,65609479,65611984,65619692,65624945,65625681,65632663,65656828,	complete_match	ENSMMUG00000000386	65574478	65656828	65574478	65656828	+	ATG4C-201	ATG4C	protein_coding	protein_coding	ENSMMUP00000000514	XM_001086456	XP_001086456	Cysteine protease ATG4C isoform 8; Uncharacterized protein [Source:UniProtKB/TrEMBL;Acc:F6X5Z7]
mmu_circ_020964	chr1_66374708_66415228_F	circRNA	Yes	chr1	66374708	66415228	+	991	40520	7	0,31217,31734,33426,36549,37958,40404	93,163,147,126,191,155,116	PREDICTED.13915.3	chr1:66371522-66374708|chr1:66415228-66425164	2	0	chr1	+	66371420	66436482	PREDICTED.13915.3	12	66371420,66374708,66405925,66406442,66408134,66411257,66412666,66415112,66425164,66428317,66430967,66436229,	66371522,66374801,66406088,66406589,66408260,66411448,66412821,66415228,66425300,66428501,66431102,66436482,	potentially_novel_isoform
mmu_circ_020967	chr1_6705157_6714697_R	circRNA	Yes	chr1	6705157	6714697	-	286	9540	3	0,1455,9469	106,109,71	PREDICTED.1465.1	chr1:6702764-6705157|chr1:6714697-6716687	2	0	chr1	-	6699368	6718558	PREDICTED.1465.1	6	6699368,6702645,6705157,6706612,6714626,6716687,	6701790,6702764,6705263,6706721,6714697,6718558,	unknown_intergenic
mmu_circ_020968	chr1_67370558_67402974_F	circRNA	Yes	chr1	67370558	67402974	+	596	32416	4	0,27484,30764,32199	107,127,145,217	PREDICTED.4003.1	chr1:67348531-67370558|chr1:67402974-67410509	0	2	chr1	+	67348379	67424609	PREDICTED.4003.1	10	67348379,67370558,67398042,67401322,67402757,67410509,67417091,67421469,67423079,67424029,	67348531,67370665,67398169,67401467,67402974,67410659,67417325,67421619,67423203,67424609,	potentially_novel_isoform
mmu_circ_020977	chr1_71284673_71284939_R	circRNA	Yes	chr1	71284673	71284939	-	266	266	1	0	266	PREDICTED.14880.6	chr1:71279901-71284673|chr1:71284939-71287621	2	0	chr1	-	71271923	71287789	PREDICTED.14880.6	9	71271923,71274238,71277224,71278662,71279209,71279744,71279853,71284673,71287621,	71273185,71274379,71277272,71278793,71279328,71279778,71279901,71284939,71287789,	potentially_novel_isoform
mmu_circ_020983	chr1_73044088_73052192_R	circRNA	Yes	chr1	73044088	73052192	-	439	8104	3	0,3711,7959	162,132,145	PREDICTED.15100.1	chr1:73030599-73044088|chr1:73052192-73056752	2	0	chr1	-	73015611	73105239	PREDICTED.15100.1	13	73015611,73024746,73028489,73030519,73044088,73047799,73052047,73056752,73061570,73063397,73072900,73084953,73104483,	73019084,73024847,73028588,73030599,73044250,73047931,73052192,73056819,73061616,73063483,73073005,73084995,73105239,	complete_match
mmu_circ_020991	chr1_78529772_78534031_F	circRNA	Yes	chr1	78529772	78534031	+	256	4259	3	0,3975,4189	88,98,70	PREDICTED.16187.1	chr1:78525920-78529772|chr1:78534031-78534638	2	0	chr1	+	78525838	78567432	PREDICTED.16187.1	12	78525838,78529772,78533747,78533961,78534638,78540832,78546479,78549667,78553300,78554304,78565591,78567157,	78525920,78529860,78533845,78534031,78534739,78540913,78546610,78549776,78553441,78554400,78565840,78567432,	potentially_novel_isoform
mmu_circ_020992	chr1_78529772_78546610_F	circRNA	Yes	chr1	78529772	78546610	+	569	16838	6	0,3975,4189,4866,11060,16707	88,98,70,101,81,131	PREDICTED.16187.1	chr1:78525920-78529772|chr1:78546610-78549667	3	0	chr1	+	78525838	78567432	PREDICTED.16187.1	12	78525838,78529772,78533747,78533961,78534638,78540832,78546479,78549667,78553300,78554304,78565591,78567157,	78525920,78529860,78533845,78534031,78534739,78540913,78546610,78549776,78553441,78554400,78565840,78567432,	potentially_novel_isoform
mmu_circ_020995	chr1_80547464_80565460_R	circRNA	Yes	chr1	80547464	80565460	-	660	17996	6	0,2883,13948,15410,16796,17869	69,103,109,82,170,127	ENSMMUT00000025757	chr1:80547076-80547464|chr1:80565460-80567407	3	0	chr1	-	80545594	80597563	ENSMMUT00000025757	25	80545594,80547464,80550347,80561412,80562874,80564260,80565333,80567407,80568130,80570752,80571723,80571916,80573220,80573455,80578944,80580506,80581270,80585859,80587773,80591025,80592656,80593156,80593380,80597348,80597523,	80547076,80547533,80550450,80561521,80562956,80564430,80565460,80567588,80568176,80570786,80571818,80572089,80573430,80573488,80579362,80580585,80581384,80585929,80587876,80591178,80592719,80593210,80593512,80597350,80597563,	complete_match	ENSMMUG00000018326	80545595	80597563	80545595	80597563	-	USP33-201	USP33	protein_coding	protein_coding	ENSMMUP00000024096			ubiquitin specific peptidase 33 [Source:HGNC Symbol;Acc:HGNC:20059]
mmu_circ_020997	chr1_80631946_80682231_F	circRNA	Yes	chr1	80631946	80682231	+	915	50285	7	0,9698,12294,15769,20214,21602,50184	114,178,137,127,134,124,101	PREDICTED.16534.1	chr1:80628467-80631946|chr1:80682231-80698536	3	0	chr1	+	80628388	80714995	PREDICTED.16534.1	14	80628388,80631946,80641644,80644240,80647715,80652160,80653548,80682130,80698536,80700841,80703177,80705078,80709559,80711518,	80628467,80632060,80641822,80644377,80647842,80652294,80653672,80682231,80698655,80700940,80703312,80705132,80709676,80714995,	potentially_novel_isoform
mmu_circ_020998	chr1_80752025_80764365_F	circRNA	Yes	chr1	80752025	80764365	+	1063	12340	7	0,1509,1904,2069,8882,9180,12151	79,192,79,149,198,177,189	PREDICTED.4778.1	chr1:80725839-80752025|chr1:80764365-80767777	0	3	chr1	+	80725247	80778148	PREDICTED.4778.1	13	80725247,80752025,80753534,80753929,80754094,80760907,80761205,80764176,80767777,80770980,80777181,80777628,80778067,	80725839,80752104,80753726,80754008,80754243,80761105,80761382,80764365,80767975,80771202,80777367,80777986,80778148,	potentially_novel_isoform
mmu_circ_020999	chr1_80767777_80771202_F	circRNA	Yes	chr1	80767777	80771202	+	420	3425	2	0,3203	198,222	PREDICTED.4778.1	chr1:80764365-80767777|chr1:80771202-80777181	0	3	chr1	+	80725247	80778148	PREDICTED.4778.1	13	80725247,80752025,80753534,80753929,80754094,80760907,80761205,80764176,80767777,80770980,80777181,80777628,80778067,	80725839,80752104,80753726,80754008,80754243,80761105,80761382,80764365,80767975,80771202,80777367,80777986,80778148,	potentially_novel_isoform
mmu_circ_021001	chr1_80808607_80810310_R	ciRNA	Yes	chr1	80808607	80810310	-	1703	1703	1	0	1703	PREDICTED.4588.2	chr1:80808607-80810310	0	2	chr1	-	80781821	80819110	PREDICTED.4588.2	20	80781821,80784584,80790034,80791362,80795043,80795205,80797557,80798363,80798858,80804816,80805214,80805440,80805639,80807114,80807306,80807468,80808045,80808568,80810310,80818876,	80784203,80784730,80790109,80791491,80795123,80795357,80797718,80798505,80798959,80804919,80805316,80805539,80805802,80807172,80807378,80807521,80808085,80808607,80810401,80819110,	complete_match
mmu_circ_021005	chr1_84752655_84755485_F	circRNA	Yes	chr1	84752655	84755485	+	623	2830	4	0,830,1764,2791	294,104,186,39	ENSMMUT00000003580	chr1:84745456-84752655|chr1:84755485-84758674	2	0	chr1	+	84506502	84795129	ENSMMUT00000003580	24	84506502,84562391,84637498,84707952,84737752,84744655,84752655,84753485,84754419,84755446,84758674,84770178,84770525,84771832,84772983,84774121,84775657,84783603,84784536,84785563,84788279,84788956,84790598,84794093,	84506541,84562433,84637671,84708166,84737862,84745456,84752949,84753589,84754605,84755485,84758858,84770304,84770731,84772006,84773191,84774342,84775724,84783695,84784581,84785732,84788408,84789053,84790727,84795129,	complete_match	ENSMMUG00000002516	84506503	84795129	84117127	84796127	+	LPHN2-202	LPHN2	protein_coding	protein_coding	ENSMMUP00000003384			latrophilin 2 [Source:HGNC Symbol;Acc:HGNC:18582]
mmu_circ_021011	chr1_86736251_86740948_R	circRNA	Yes	chr1	86736251	86740948	-	376	4697	2	0,4538	217,159	PREDICTED.4980.1	chr1:86731779-86736251|chr1:86740948-86742307	0	2	chr1	-	86657833	86799159	PREDICTED.4980.1	24	86657833,86672850,86679937,86693407,86695653,86696775,86700472,86705401,86707465,86708848,86709008,86723300,86724178,86724265,86724425,86724638,86731614,86736251,86740789,86742307,86743525,86745502,86745847,86798937,	86662538,86673024,86680098,86693488,86695788,86696981,86700671,86705488,86707601,86708922,86709156,86723395,86724228,86724287,86724436,86724714,86731779,86736468,86740948,86742375,86743647,86745634,86746048,86799159,	potentially_novel_isoform
mmu_circ_021012	chr1_86986091_87020223_F	circRNA	Yes	chr1	86986091	87020223	+	884	34132	8	0,2962,4792,5870,16968,18080,22536,33967	62,129,99,83,127,96,123,165	PREDICTED.18442.2	chr1:86918465-86986091|chr1:87020223-87035432	3	0	chr1	+	86917969	87036572	PREDICTED.18442.2	10	86917969,86986091,86989053,86990883,86991961,87003059,87004171,87008627,87020058,87035432,	86918465,86986153,86989182,86990982,86992044,87003186,87004267,87008750,87020223,87036572,	potentially_novel_isoform
mmu_circ_021013	chr1_87449707_87465489_R	circRNA	Yes	chr1	87449707	87465489	-	1478	15782	10	0,517,2507,6460,6717,9001,10694,14139,15111,15650	174,137,151,178,76,136,111,213,170,132	PREDICTED.4779.1	chr1:87445679-87449707|chr1:87465489-87484569	3	0	chr1	-	87437974	87484660	PREDICTED.4779.1	14	87437974,87444287,87445564,87449707,87450224,87452214,87456167,87456424,87458708,87460401,87463846,87464818,87465357,87484569,	87440973,87444453,87445679,87449881,87450361,87452365,87456345,87456500,87458844,87460512,87464059,87464988,87465489,87484660,	complete_match
mmu_circ_021016	chr1_89427298_89446658_F	circRNA	Yes	chr1	89427298	89446658	+	689	19360	6	0,3777,6820,8599,18785,19259	142,129,134,93,90,101	ENSMMUT00000018928	chr1:89416455-89427298|chr1:89446658-89454221	1	3	chr1	+	89416268	89455609	ENSMMUT00000018928	9	89416268,89427298,89431075,89434118,89435897,89446083,89446557,89454221,89455146,	89416455,89427440,89431204,89434252,89435990,89446173,89446658,89454450,89455609,	complete_match	ENSMMUG00000013487	89416269	89455609	89416269	89455609	+	SH3GLB1-201	SH3GLB1	protein_coding	protein_coding	ENSMMUP00000017726	XM_001109639	XP_001109639	Uncharacterized protein [Source:UniProtKB/TrEMBL;Acc:F6ZLA9]
mmu_circ_021026	chr1_9487840_9487969_R	ciRNA	Yes	chr1	9487840	9487969	-	129	129	1	0	129	PREDICTED.1948.1	chr1:9487822-9487969	2	0	chr1	-	9484451	9491471	PREDICTED.1948.1	14	9484451,9485293,9486522,9486809,9487018,9487702,9487969,9488198,9488454,9488952,9489222,9490003,9490465,9490727,	9485045,9486055,9486716,9486925,9487151,9487822,9488107,9488348,9488565,9489102,9489273,9490099,9490651,9491471,	potentially_novel_isoform
mmu_circ_021028	chr1_95307627_95311388_F	circRNA	Yes	chr1	95307627	95311388	+	967	3761	2	0,2830	36,931	PREDICTED.20040.1	chr1:95294359-95307627|chr1:95311388-95320392	0	5	chr1	+	95285676	95378122	PREDICTED.20040.1	13	95285676,95286990,95288559,95291027,95291327,95294270,95307627,95310457,95320392,95323363,95333193,95368779,95372913,	95285942,95287036,95288674,95291126,95291393,95294359,95307663,95311388,95320475,95323444,95333262,95368929,95378122,	complete_match
mmu_circ_021030	chr1_95643768_95658831_R	circRNA	Yes	chr1	95643768	95658831	-	295	15063	4	0,698,2975,15002	147,33,54,61	ENSMMUT00000046709	chr1:95602983-95643768|chr1:95658831-95676949	2	0	chr1	-	95595275	95780572	ENSMMUT00000046709	17	95595275,95596947,95598543,95602848,95643768,95644466,95646743,95658770,95676949,95677450,95678459,95681033,95685340,95686611,95687764,95718444,95780511,	95595323,95597106,95598684,95602983,95643915,95644499,95646797,95658831,95677047,95677540,95678603,95681159,95685415,95686836,95687954,95718674,95780572,	complete_match	ENSMMUG00000005070	95595276	95780572	95500485	95780572	-	EVI5-202	EVI5	protein_coding	protein_coding	ENSMMUP00000039739			Uncharacterized protein [Source:UniProtKB/TrEMBL;Acc:F7C4Q1]
mmu_circ_021032	chr1_95830307_95833169_F	ciRNA	Yes	chr1	95830307	95833169	+	2862	2862	1	0	2862	PREDICTED.5311.1	chr1:95830307-95833190	2	0	chr1	+	95824242	95834934	PREDICTED.5311.1	9	95824242,95825578,95825736,95826988,95827374,95829400,95830124,95833190,95834417,	95824313,95825648,95825852,95827123,95827401,95829565,95830307,95833279,95834934,	potentially_novel_isoform
mmu_circ_021038	chr1_97466459_97483758_F	circRNA	Yes	chr1	97466459	97483758	+	509	17299	5	0,6484,9943,15692,17089	37,99,89,74,210	PREDICTED.20823.1	chr1:97419476-97466459|chr1:97483758-97486290	2	0	chr1	+	97419318	97505196	PREDICTED.20823.1	16	97419318,97466459,97472943,97476402,97482151,97483548,97486290,97488460,97491150,97494220,97494373,97494571,97496406,97496584,97497864,97505047,	97419476,97466496,97473042,97476491,97482225,97483758,97486347,97488603,97491220,97494290,97494471,97494663,97496498,97496657,97497928,97505196,	potentially_novel_isoform
mmu_circ_021039	chr1_97919977_97924004_R	circRNA	Yes	chr1	97919977	97924004	-	591	4027	5	0,2176,2628,3624,3905	147,117,138,67,122	ENSMMUT00000002391	chr1:97918685-97919977|chr1:97924004-97953036	2	0	chr1	-	97917579	97953329	ENSMMUT00000002391	7	97917579,97919977,97922153,97922605,97923601,97923882,97953036,	97918685,97920124,97922270,97922743,97923668,97924004,97953329,	complete_match	ENSMMUG00000001690	97917580	97953329	97917580	97953329	-	CNN3-201	CNN3	protein_coding	protein_coding	ENSMMUP00000002262	XM_001103736	XP_001103736	Calponin-3; Uncharacterized protein [Source:UniProtKB/TrEMBL;Acc:F7G309]
mmu_circ_021041	chr10_11207331_11210401_R	circRNA	Yes	chr10	11207331	11210401	-	3070	3070	1	0	3070	PREDICTED.51744.1	chr10:10986784-11207331|chr10:11210401-11489567	3	0	chr10	-	10986319	11489667	PREDICTED.51744.1	3	10986319,11207331,11489567,	10986784,11210401,11489667,	ref_exonic_overlap
mmu_circ_021043	chr10_12293322_12294658_F	circRNA	Yes	chr10	12293322	12294658	+	225	1336	2	0,1273	162,63	PREDICTED.49409.1	chr10:12272020-12293322|chr10:12294658-12299304	2	0	chr10	+	12267120	12299572	PREDICTED.49409.1	5	12267120,12271780,12293322,12294595,12299304,	12267264,12272020,12293484,12294658,12299572,	potentially_novel_isoform
mmu_circ_021045	chr10_12850473_12856829_F	circRNA	Yes	chr10	12850473	12856829	+	388	6356	4	0,3743,5278,6298	156,65,109,58	PREDICTED.14125.1	chr10:12846811-12850473|chr10:12856829-12859375	0	2	chr10	+	12729409	12867612	PREDICTED.14125.1	28	12729409,12732452,12736840,12749054,12764799,12766122,12768144,12776108,12777723,12790045,12791894,12794960,12796101,12807439,12823816,12834982,12836404,12839066,12842512,12845278,12845492,12846746,12850473,12854216,12855751,12856771,12859375,12863033,	12729428,12732597,12736954,12749163,12764858,12766174,12768239,12776189,12777799,12790122,12792055,12795103,12796214,12807652,12823978,12835075,12836488,12839237,12842611,12845368,12845637,12846811,12850629,12854281,12855860,12856829,12859579,12867612,	potentially_novel_isoform
mmu_circ_021047	chr10_13557947_13559925_F	circRNA	Yes	chr10	13557947	13559925	+	206	1978	2	0,1885	113,93	ENSMMUT00000003924	chr10:13532106-13557947|chr10:13559925-13567023	2	0	chr10	+	13529854	13571196	ENSMMUT00000003924	5	13529854,13531931,13557947,13559832,13567023,	13530115,13532106,13558060,13559925,13571196,	complete_match	ENSMMUG00000002761	13529855	13571196	13529855	13571196	+	ADNP-201	ADNP	protein_coding	protein_coding	ENSMMUP00000003708	XM_001095183	XP_001094971	Activity-dependent neuroprotective protein; Activity-dependent neuroprotector homeobox protein; Uncharacterized protein [Source:UniProtKB/TrEMBL;Acc:F7H2B6]
mmu_circ_021057	chr10_15403488_15419201_R	circRNA	Yes	chr10	15403488	15419201	-	1299	15713	11	0,179,1261,1610,2889,5561,6790,12256,13790,14977,15647	86,98,209,151,98,104,137,62,85,203,66	ENSMMUT00000027581	chr10:15402474-15403488|chr10:15419201-15420598	4	0	chr10	-	15396728	15444678	ENSMMUT00000027581	25	15396728,15399000,15399685,15402392,15403488,15403667,15404749,15405098,15406377,15409049,15410278,15415744,15417278,15418465,15419135,15420598,15420841,15422952,15424443,15425775,15426530,15426747,15429650,15432800,15444554,	15397324,15399232,15399832,15402474,15403574,15403765,15404958,15405249,15406475,15409153,15410415,15415806,15417363,15418668,15419201,15420728,15421009,15423045,15424551,15425866,15426676,15426849,15429793,15432896,15444678,	complete_match	ENSMMUG00000019636	15396729	15444678	15396729	15444678	-	CSE1L-201	CSE1L	protein_coding	protein_coding	ENSMMUP00000025796	XM_001100735	XP_002798148	Exportin-2; Exportin-2 isoform 1; Uncharacterized protein [Source:UniProtKB/TrEMBL;Acc:F7AUV0]
mmu_circ_021058	chr10_15403488_15424551_R	circRNA	Yes	chr10	15403488	15424551	-	1798	21063	15	0,179,1261,1610,2889,5561,6790,12256,13790,14977,15647,17110,17353,19464,20955	86,98,209,151,98,104,137,62,85,203,66,130,168,93,108	ENSMMUT00000027581	chr10:15402474-15403488|chr10:15424551-15425775	1	1	chr10	-	15396728	15444678	ENSMMUT00000027581	25	15396728,15399000,15399685,15402392,15403488,15403667,15404749,15405098,15406377,15409049,15410278,15415744,15417278,15418465,15419135,15420598,15420841,15422952,15424443,15425775,15426530,15426747,15429650,15432800,15444554,	15397324,15399232,15399832,15402474,15403574,15403765,15404958,15405249,15406475,15409153,15410415,15415806,15417363,15418668,15419201,15420728,15421009,15423045,15424551,15425866,15426676,15426849,15429793,15432896,15444678,	complete_match	ENSMMUG00000019636	15396729	15444678	15396729	15444678	-	CSE1L-201	CSE1L	protein_coding	protein_coding	ENSMMUP00000025796	XM_001100735	XP_002798148	Exportin-2; Exportin-2 isoform 1; Uncharacterized protein [Source:UniProtKB/TrEMBL;Acc:F7AUV0]
mmu_circ_021059	chr10_15426530_15426849_R	circRNA	Yes	chr10	15426530	15426849	-	248	319	2	0,217	146,102	ENSMMUT00000027581	chr10:15425866-15426530|chr10:15426849-15429650	5	2	chr10	-	15396728	15444678	ENSMMUT00000027581	25	15396728,15399000,15399685,15402392,15403488,15403667,15404749,15405098,15406377,15409049,15410278,15415744,15417278,15418465,15419135,15420598,15420841,15422952,15424443,15425775,15426530,15426747,15429650,15432800,15444554,	15397324,15399232,15399832,15402474,15403574,15403765,15404958,15405249,15406475,15409153,15410415,15415806,15417363,15418668,15419201,15420728,15421009,15423045,15424551,15425866,15426676,15426849,15429793,15432896,15444678,	complete_match	ENSMMUG00000019636	15396729	15444678	15396729	15444678	-	CSE1L-201	CSE1L	protein_coding	protein_coding	ENSMMUP00000025796	XM_001100735	XP_002798148	Exportin-2; Exportin-2 isoform 1; Uncharacterized protein [Source:UniProtKB/TrEMBL;Acc:F7AUV0]
mmu_circ_021062	chr10_15504032_15504432_R	circRNA	Yes	chr10	15504032	15504432	-	281	400	2	0,248	129,152	PREDICTED.14474.2	chr10:15502407-15504032|chr10:15504432-15505052	0	2	chr10	-	15454996	15552390	PREDICTED.14474.2	40	15454996,15459074,15462553,15466139,15468102,15473876,15475324,15475487,15476474,15478907,15479173,15480765,15482448,15487752,15493228,15493500,15495566,15498826,15502248,15504032,15504280,15505052,15505327,15508429,15509174,15517753,15519073,15520666,15521526,15522591,15524051,15524198,15524214,15527495,15529577,15539115,15540013,15541437,15550774,15551532,	15458225,15459192,15462692,15466308,15468233,15473991,15475379,15475626,15476610,15479037,15479304,15480926,15482621,15487904,15493398,15493541,15495666,15498974,15502407,15504161,15504432,15505224,15505412,15508635,15509286,15517937,15519182,15520806,15521626,15522674,15524193,15524202,15524345,15527647,15529646,15539350,15540193,15541584,15550898,15552390,	potentially_novel_isoform
mmu_circ_021064	chr10_15539115_15551563_R	circRNA	Yes	chr10	15539115	15551563	-	717	12448	5	0,898,2322,11659,12417	235,180,147,124,31	PREDICTED.14474.1	chr10:15529646-15539115|chr10:15551563-15568385	11	0	chr10	-	15454996	15568559	PREDICTED.14474.1	41	15454996,15459074,15462553,15466139,15468102,15473876,15475324,15475487,15476474,15478907,15479173,15480765,15482448,15487752,15493228,15493500,15495566,15498826,15502248,15504032,15504280,15505052,15505327,15508429,15509174,15517753,15519073,15520666,15521526,15522591,15524051,15524198,15524214,15527495,15529577,15539115,15540013,15541437,15550774,15551532,15568385,	15458225,15459192,15462692,15466308,15468233,15473991,15475379,15475626,15476610,15479037,15479304,15480926,15482621,15487904,15493398,15493541,15495666,15498974,15502407,15504161,15504432,15505224,15505412,15508635,15509286,15517937,15519182,15520806,15521626,15522674,15524193,15524202,15524345,15527647,15529646,15539350,15540193,15541584,15550898,15551563,15568559,	complete_match
mmu_circ_021069	chr10_18674729_18675564_F	circRNA	Yes	chr10	18674729	18675564	+	448	835	4	0,188,420,698	52,144,115,137	ENSMMUT00000029566	chr10:18672328-18674729|chr10:18675564-18676170	0	4	chr10	+	18672261	18676331	ENSMMUT00000029566	6	18672261,18674729,18674917,18675149,18675427,18676170,	18672328,18674781,18675061,18675264,18675564,18676331,	complete_match	ENSMMUG00000021025	18672262	18676331	18672262	18676331	+	TNNC2-201	TNNC2	protein_coding	protein_coding	ENSMMUP00000027667	XM_001108623	XP_001108623	Troponin C, skeletal muscle; Uncharacterized protein [Source:UniProtKB/TrEMBL;Acc:F7HGA7]
mmu_circ_021070	chr10_19117941_19120503_F	circRNA	Yes	chr10	19117941	19120503	+	186	2562	2	0,2515	139,47	ENSMMUT00000004816	chr10:19105605-19117941|chr10:19120503-19122948	2	0	chr10	+	19105505	19128259	ENSMMUT00000004816	5	19105505,19117941,19120456,19122948,19126109,	19105605,19118080,19120503,19123147,19128259,	complete_match	ENSMMUG00000003406	19105506	19128259	19105506	19128259	+	SDC4-201	SDC4	protein_coding	protein_coding	ENSMMUP00000004542	XM_001108879	XP_001108879	Syndecan [Source:UniProtKB/TrEMBL;Acc:F7FE95]
mmu_circ_021073	chr10_20829960_20837700_R	circRNA	Yes	chr10	20829960	20837700	-	283	7740	3	0,1924,7613	69,87,127	PREDICTED.51381.4	chr10:20827043-20829960|chr10:20837700-20846012	2	0	chr10	-	20815973	20860868	PREDICTED.51381.4	12	20815973,20817699,20826888,20829960,20831884,20837573,20846012,20846781,20847150,20854990,20856606,20860477,	20816561,20817787,20827043,20830029,20831971,20837700,20846084,20846857,20847280,20855078,20856731,20860868,	potentially_novel_isoform
mmu_circ_021074	chr10_20983043_20983371_R	ciRNA	Yes	chr10	20983043	20983371	-	328	328	1	0	328	ENSMMUT00000044930	chr10:20983021-20983371	0	2	chr10	-	20981232	20983639	ENSMMUT00000044930	5	20981232,20982188,20982548,20982896,20983371,	20982084,20982272,20982757,20983021,20983639,	complete_match	ENSMMUG00000006742	20981233	20983639	20981233	20985153	-			protein_coding	protein_coding	ENSMMUP00000037949
mmu_circ_021085	chr10_27065875_27068313_R	circRNA	Yes	chr10	27065875	27068313	-	353	2438	3	0,2055,2339	150,104,99	PREDICTED.52947.5	chr10:27064501-27065875|chr10:27068313-27072208	1	1	chr10	-	27056704	27072573	PREDICTED.52947.5	10	27056704,27059227,27059514,27060409,27061745,27064345,27065875,27067930,27068214,27072208,	27058937,27059359,27059668,27060486,27061925,27064501,27066025,27068034,27068313,27072573,	potentially_novel_isoform
mmu_circ_021087	chr10_27232335_27236456_R	circRNA	Yes	chr10	27232335	27236456	-	259	4121	3	0,1700,4034	76,96,87	PREDICTED.53127.1	chr10:27229793-27232335|chr10:27236456-27237646	2	0	chr10	-	27224597	27285146	PREDICTED.53127.1	20	27224597,27224904,27225016,27227925,27229663,27232335,27234035,27236369,27237646,27240487,27242313,27252465,27255789,27259121,27261673,27262614,27266927,27267638,27279775,27284914,	27224623,27224930,27225094,27227973,27229793,27232411,27234131,27236456,27237841,27240602,27242405,27252571,27255908,27259298,27261808,27262690,27267103,27267734,27279969,27285146,	potentially_novel_isoform
mmu_circ_021088	chr10_27232335_27237841_R	circRNA	Yes	chr10	27232335	27237841	-	454	5506	4	0,1700,4034,5311	76,96,87,195	PREDICTED.53127.1	chr10:27229793-27232335|chr10:27237841-27240487	2	0	chr10	-	27224597	27285146	PREDICTED.53127.1	20	27224597,27224904,27225016,27227925,27229663,27232335,27234035,27236369,27237646,27240487,27242313,27252465,27255789,27259121,27261673,27262614,27266927,27267638,27279775,27284914,	27224623,27224930,27225094,27227973,27229793,27232411,27234131,27236456,27237841,27240602,27242405,27252571,27255908,27259298,27261808,27262690,27267103,27267734,27279969,27285146,	potentially_novel_isoform
mmu_circ_021090	chr10_27279775_27279969_R	circRNA	Yes	chr10	27279775	27279969	-	194	194	1	0	194	PREDICTED.15321.1	chr10:27267734-27279775|chr10:27279969-27284914	0	2	chr10	-	27224770	27285268	PREDICTED.15321.1	18	27224770,27227925,27229663,27232335,27234035,27236369,27237646,27240487,27242313,27252465,27255789,27259121,27261673,27262614,27266927,27267638,27279775,27284914,	27225094,27227973,27229793,27232411,27234131,27236456,27237841,27240602,27242405,27252571,27255908,27259298,27261808,27262690,27267103,27267734,27279969,27285268,	potentially_novel_isoform
mmu_circ_021092	chr10_27526788_27557447_F	circRNA	Yes	chr10	27526788	27557447	+	983	30659	9	0,8493,11304,11523,16314,17488,22879,24456,30554	71,156,101,109,92,116,140,93,105	PREDICTED.15312.2	chr10:27523432-27526788|chr10:27557447-27557927	1	1	chr10	+	27504930	27566034	PREDICTED.15312.2	16	27504930,27510722,27516826,27521818,27523316,27526788,27535281,27538092,27538311,27543102,27544276,27549667,27551244,27557342,27557927,27563244,	27505312,27510789,27516899,27521979,27523432,27526859,27535437,27538193,27538420,27543194,27544392,27549807,27551337,27557447,27558065,27566034,	complete_match
mmu_circ_021094	chr10_27615823_27627605_F	circRNA	Yes	chr10	27615823	27627605	+	384	11782	2	0,11623	225,159	PREDICTED.53100.1	chr10:27592562-27615823|chr10:27627605-27639534	2	0	chr10	+	27592426	27679360	PREDICTED.53100.1	15	27592426,27615823,27627446,27639534,27640729,27644159,27647134,27648494,27651497,27652546,27654328,27659875,27660494,27662840,27673794,	27592562,27616048,27627605,27639597,27641911,27644300,27647260,27648725,27651602,27652714,27654580,27659947,27660565,27664191,27679360,	potentially_novel_isoform
mmu_circ_021098	chr10_28628676_28664214_R	circRNA	Yes	chr10	28628676	28664214	-	1141	35538	5	0,26825,27521,29088,35150	279,180,180,114,388	ENSMMUT00000044820	chr10:28615836-28628676|chr10:28664214-28669210	2	0	chr10	-	28589839	28760144	ENSMMUT00000044820	16	28589839,28597542,28601199,28611359,28614888,28615737,28628676,28655501,28656197,28657764,28663826,28669210,28680265,28684333,28723260,28760065,	28590035,28597738,28601299,28611538,28615053,28615836,28628955,28655681,28656377,28657878,28664214,28669290,28680350,28684505,28723375,28760144,	complete_match	ENSMMUG00000010633	28589840	28760144	28589840	28760144	-	PHF20-201	PHF20	protein_coding	protein_coding	ENSMMUP00000037841	XM_002798166	XP_002798212	Uncharacterized protein [Source:UniProtKB/TrEMBL;Acc:F7BJ85]
mmu_circ_021099	chr10_28655501_28656377_R	circRNA	Yes	chr10	28655501	28656377	-	360	876	2	0,696	180,180	ENSMMUT00000044820	chr10:28628955-28655501|chr10:28656377-28657764	2	0	chr10	-	28589839	28760144	ENSMMUT00000044820	16	28589839,28597542,28601199,28611359,28614888,28615737,28628676,28655501,28656197,28657764,28663826,28669210,28680265,28684333,28723260,28760065,	28590035,28597738,28601299,28611538,28615053,28615836,28628955,28655681,28656377,28657878,28664214,28669290,28680350,28684505,28723375,28760144,	complete_match	ENSMMUG00000010633	28589840	28760144	28589840	28760144	-	PHF20-201	PHF20	protein_coding	protein_coding	ENSMMUP00000037841	XM_002798166	XP_002798212	Uncharacterized protein [Source:UniProtKB/TrEMBL;Acc:F7BJ85]
mmu_circ_021100	chr10_28655501_28680350_R	circRNA	Yes	chr10	28655501	28680350	-	1027	24849	6	0,696,2263,8325,13709,24764	180,180,114,388,80,85	ENSMMUT00000044820	chr10:28628955-28655501|chr10:28680350-28684333	2	1	chr10	-	28589839	28760144	ENSMMUT00000044820	16	28589839,28597542,28601199,28611359,28614888,28615737,28628676,28655501,28656197,28657764,28663826,28669210,28680265,28684333,28723260,28760065,	28590035,28597738,28601299,28611538,28615053,28615836,28628955,28655681,28656377,28657878,28664214,28669290,28680350,28684505,28723375,28760144,	complete_match	ENSMMUG00000010633	28589840	28760144	28589840	28760144	-	PHF20-201	PHF20	protein_coding	protein_coding	ENSMMUP00000037841	XM_002798166	XP_002798212	Uncharacterized protein [Source:UniProtKB/TrEMBL;Acc:F7BJ85]
mmu_circ_021102	chr10_29169411_29177038_F	circRNA	Yes	chr10	29169411	29177038	+	131	7627	2	0,7569	73,58	PREDICTED.53477.1	chr10:29162134-29169411|chr10:29177038-29196992	2	0	chr10	+	29133628	29242427	PREDICTED.53477.1	10	29133628,29148993,29160254,29162026,29169411,29176980,29196992,29231422,29239478,29242168,	29133659,29149098,29160347,29162134,29169484,29177038,29197101,29231500,29239592,29242427,	potentially_novel_isoform
mmu_circ_021105	chr10_29538890_29544537_F	circRNA	Yes	chr10	29538890	29544537	+	299	5647	2	0,5515	167,132	ENSMMUT00000000342	chr10:29528592-29538890|chr10:29544537-29546224	2	0	chr10	+	29484023	29556513	ENSMMUT00000000342	18	29484023,29493519,29505665,29508236,29514067,29519349,29528406,29538890,29544405,29546224,29548963,29550517,29551616,29552475,29553567,29555095,29556041,29556375,	29484155,29493636,29505723,29508292,29514196,29519557,29528592,29539057,29544537,29546283,29549065,29550601,29551707,29552616,29553676,29555208,29556248,29556513,	complete_match	ENSMMUG00000000229	29484024	29556513	29484024	29556513	+	TRPC4AP-201	TRPC4AP	protein_coding	protein_coding	ENSMMUP00000000322	XM_001101083	XP_001101083	Short transient receptor potential channel 4-associated protein; Uncharacterized protein [Source:UniProtKB/TrEMBL;Acc:F6XAU6]
mmu_circ_021106	chr10_29568679_29568834_R	ciRNA	Yes	chr10	29568679	29568834	-	155	155	1	0	155	PREDICTED.53969.1	chr10:29568655-29568834	2	0	chr10	-	29560192	29573391	PREDICTED.53969.1	21	29560192,29560740,29561026,29561234,29562026,29562493,29562942,29563178,29563465,29563741,29564116,29564524,29565565,29566484,29566729,29568834,29569349,29569513,29569740,29571367,29572625,	29560598,29560937,29561145,29561361,29562416,29562584,29563088,29563398,29563523,29563761,29564150,29564612,29565821,29566621,29568655,29568922,29569426,29569646,29569920,29572473,29573391,	potentially_novel_isoform
mmu_circ_021111	chr10_30112580_30116805_R	circRNA	Yes	chr10	30112580	30116805	-	245	4225	2	0,4050	70,175	PREDICTED.15758.1	chr10:30104443-30112580|chr10:30116805-30120183	1	2	chr10	-	30060127	30197539	PREDICTED.15758.1	25	30060127,30065996,30071838,30074326,30074872,30083246,30083718,30084650,30086547,30089622,30091002,30098639,30104357,30112580,30116630,30120183,30122331,30124957,30138455,30146640,30147866,30152607,30166989,30190602,30197472,	30062820,30066065,30071939,30074431,30074993,30083387,30083852,30084810,30086636,30089694,30091075,30098768,30104443,30112650,30116805,30120279,30122521,30125115,30138501,30146778,30147991,30152749,30167080,30190679,30197539,	potentially_novel_isoform
mmu_circ_021112	chr10_30112580_30146778_R	circRNA	Yes	chr10	30112580	30146778	-	873	34198	7	0,4050,7603,9751,12377,25875,34060	70,175,96,190,158,46,138	PREDICTED.15758.1	chr10:30104443-30112580|chr10:30146778-30147866	2	1	chr10	-	30060127	30197539	PREDICTED.15758.1	25	30060127,30065996,30071838,30074326,30074872,30083246,30083718,30084650,30086547,30089622,30091002,30098639,30104357,30112580,30116630,30120183,30122331,30124957,30138455,30146640,30147866,30152607,30166989,30190602,30197472,	30062820,30066065,30071939,30074431,30074993,30083387,30083852,30084810,30086636,30089694,30091075,30098768,30104443,30112650,30116805,30120279,30122521,30125115,30138501,30146778,30147991,30152749,30167080,30190679,30197539,	potentially_novel_isoform
mmu_circ_021114	chr10_30120183_30125115_R	circRNA	Yes	chr10	30120183	30125115	-	444	4932	3	0,2148,4774	96,190,158	PREDICTED.15758.1	chr10:30116805-30120183|chr10:30125115-30138455	2	0	chr10	-	30060127	30197539	PREDICTED.15758.1	25	30060127,30065996,30071838,30074326,30074872,30083246,30083718,30084650,30086547,30089622,30091002,30098639,30104357,30112580,30116630,30120183,30122331,30124957,30138455,30146640,30147866,30152607,30166989,30190602,30197472,	30062820,30066065,30071939,30074431,30074993,30083387,30083852,30084810,30086636,30089694,30091075,30098768,30104443,30112650,30116805,30120279,30122521,30125115,30138501,30146778,30147991,30152749,30167080,30190679,30197539,	potentially_novel_isoform
mmu_circ_021124	chr10_31828667_31828919_F	circRNA	Yes	chr10	31828667	31828919	+	157	252	2	0,149	54,103	PREDICTED.54109.1	chr10:31813922-31828667|chr10:31828919-31845531	34	0	chr10	+	31813785	31845620	PREDICTED.54109.1	4	31813785,31828667,31828816,31845531,	31813922,31828721,31828919,31845620,	potentially_novel_isoform
mmu_circ_021131	chr10_331580_346289_R	circRNA	Yes	chr10	331580	346289	-	1961	14709	9	0,290,630,9966,10331,10409,10636,10753,14549	213,263,923,192,73,14,47,76,160	PREDICTED.47528.1	chr10:327634-331580|chr10:346289-346829	2	0	chr10	-	309781	361644	PREDICTED.47528.1	25	309781,310855,313569,314722,315547,316105,317329,318726,321208,327511,331580,331870,332210,341546,341911,341989,342216,342333,346129,346829,348415,348732,348880,349014,361129,	310083,310982,313684,314814,315681,316282,317449,318865,321330,327634,331793,332133,333133,341738,341984,342003,342263,342409,346289,347006,348494,348787,348898,349040,361644,	potentially_novel_isoform
mmu_circ_021143	chr10_37189081_37189256_F	circRNA	Yes	chr10	37189081	37189256	+	72	175	2	0,164	61,11	PREDICTED.16227.1	chr10:37185695-37189081|chr10:37189256-37198017	0	2	chr10	+	37178174	37207516	PREDICTED.16227.1	5	37178174,37185511,37189081,37189245,37198017,	37178229,37185695,37189142,37189256,37207516,	potentially_novel_isoform
mmu_circ_021144	chr10_37248047_37254364_F	circRNA	Yes	chr10	37248047	37254364	+	427	6317	3	0,4425,6191	177,124,126	PREDICTED.55378.5	chr10:37246404-37248047|chr10:37254364-37259328	2	2	chr10	+	37225454	37261310	PREDICTED.55378.5	8	37225454,37238330,37244017,37246150,37248047,37252472,37254238,37259328,	37226080,37238396,37244370,37246404,37248224,37252596,37254364,37261310,	potentially_novel_isoform
mmu_circ_021145	chr10_38223827_38239637_R	circRNA	Yes	chr10	38223827	38239637	-	500	15810	4	0,1108,2175,15652	182,71,89,158	PREDICTED.55863.5	chr10:38214444-38223827|chr10:38239637-38242384	2	0	chr10	-	38212427	38339313	PREDICTED.55863.5	11	38212427,38214323,38223827,38224935,38226002,38239479,38242384,38252508,38272073,38312148,38339219,	38213835,38214444,38224009,38225006,38226091,38239637,38242501,38252607,38272333,38312275,38339313,	potentially_novel_isoform
mmu_circ_021146	chr10_38515658_38517108_F	circRNA	Yes	chr10	38515658	38517108	+	234	1450	2	0,1353	137,97	PREDICTED.55664.1	chr10:38470951-38515658|chr10:38517108-38518729	2	0	chr10	+	38470368	38533847	PREDICTED.55664.1	15	38470368,38515658,38517011,38518729,38520864,38524427,38525105,38527027,38527924,38528069,38528190,38528574,38531160,38531837,38532207,	38470951,38515795,38517108,38518827,38521004,38524486,38525188,38527115,38528000,38528172,38528198,38528609,38531280,38531941,38533847,	potentially_novel_isoform
mmu_circ_021152	chr10_41953144_41983753_F	circRNA	Yes	chr10	41953144	41983753	+	616	30609	6	0,17792,19590,21054,29001,30442	138,80,54,76,101,167	PREDICTED.22925.1	chr10:41689758-41953144|chr10:41983753-42009705	0	4	chr10	+	41449586	42209546	PREDICTED.22925.1	32	41449586,41467528,41689689,41953144,41970936,41972734,41974198,41982145,41983586,42009705,42022069,42033550,42041238,42042352,42047119,42049438,42052026,42053784,42058052,42061245,42063171,42064270,42065393,42080826,42084193,42088576,42098284,42112168,42112352,42113224,42113888,42206606,	41449727,41467606,41689758,41953282,41971016,41972788,41974274,41982246,41983753,42009852,42022227,42033633,42041323,42042530,42047187,42049535,42052111,42053909,42058207,42061410,42063271,42064375,42065503,42080959,42084247,42088796,42098465,42112245,42112442,42113282,42113975,42209546,	complete_match
mmu_circ_021156	chr10_42767683_42770076_F	circRNA	Yes	chr10	42767683	42770076	+	252	2393	2	0,2217	76,176	PREDICTED.17033.1	chr10:42763722-42767683|chr10:42770076-42778888	0	2	chr10	+	42705917	42779228	PREDICTED.17033.1	17	42705917,42712474,42718690,42719471,42719897,42721942,42731046,42732557,42735027,42746575,42748031,42754664,42754867,42763606,42767683,42769900,42778888,	42706638,42712575,42718832,42719556,42720022,42721994,42731149,42732722,42735232,42746664,42748182,42754714,42754933,42763722,42767759,42770076,42779228,	potentially_novel_isoform
mmu_circ_021164	chr10_47048001_47048149_R	circRNA	Yes	chr10	47048001	47048149	-	148	148	1	0	148	PREDICTED.57371.1	chr10:47042094-47048001|chr10:47048149-47051058	2	0	chr10	-	46996370	47054728	PREDICTED.57371.1	10	46996370,46999805,47001416,47010334,47015380,47041932,47048001,47051058,47052458,47053612,	46997636,46999952,47001493,47010422,47015502,47042094,47048149,47051173,47052611,47054728,	potentially_novel_isoform
mmu_circ_021169	chr10_51265239_51275820_R	circRNA	Yes	chr10	51265239	51275820	-	897	10581	9	0,4024,5408,5582,6648,6811,8040,8827,10459	86,160,87,40,76,106,96,124,122	ENSMMUT00000044432	chr10:51264544-51265239|chr10:51275820-51277071	0	2	chr10	-	51263742	51290334	ENSMMUT00000044432	13	51263742,51265239,51269263,51270647,51270821,51271887,51272050,51273279,51274066,51275698,51277071,51278665,51290007,	51264544,51265325,51269423,51270734,51270861,51271963,51272156,51273375,51274190,51275820,51277182,51278770,51290334,	complete_match	ENSMMUG00000011476	51263743	51290334	51263743	51290460	-	SNX5-202	SNX5	protein_coding	protein_coding	ENSMMUP00000037449	XM_001087384	XP_001087384	Uncharacterized protein [Source:UniProtKB/TrEMBL;Acc:F6T231]
mmu_circ_021171	chr10_51475677_51493990_F	circRNA	Yes	chr10	51475677	51493990	+	820	18313	5	0,6325,15342,15623,18095	119,122,236,125,218	PREDICTED.16805.1	chr10:51473398-51475677|chr10:51493990-51494127	0	2	chr10	+	51468407	51519024	PREDICTED.16805.1	12	51468407,51472682,51475677,51482002,51491019,51491300,51493772,51494127,51512431,51513841,51515331,51517976,	51468557,51473398,51475796,51482124,51491255,51491425,51493990,51494696,51512568,51514017,51515522,51519024,	potentially_novel_isoform
mmu_circ_021173	chr10_51921959_51924469_F	circRNA	Yes	chr10	51921959	51924469	+	327	2510	2	0,2274	91,236	ENSMMUT00000018068	chr10:51915990-51921959|chr10:51924469-51950731	0	2	chr10	+	51915806	52093913	ENSMMUT00000018068	6	51915806,51921959,51924233,51950731,52079987,52093373,	51915990,51922050,51924469,51950838,52080159,52093913,	complete_match	ENSMMUG00000012880	51915807	52093913	51915807	52093913	+	DTD1-201	DTD1	protein_coding	protein_coding	ENSMMUP00000016916	XM_001088979	XP_001088979	D-tyrosyl-tRNA(Tyr) deacylase [Source:UniProtKB/TrEMBL;Acc:F6SFP9]
mmu_circ_021183	chr10_54508898_54523058_F	circRNA	Yes	chr10	54508898	54523058	+	171	14160	2	0,14055	66,105	ENSMMUT00000044385	chr10:54507694-54508898|chr10:54523058-54526609	0	2	chr10	+	54419647	54528249	ENSMMUT00000044385	11	54419647,54425773,54430021,54439287,54456477,54457471,54498385,54507528,54508898,54522953,54526609,	54419830,54425836,54430184,54439377,54457123,54457787,54498479,54507694,54508964,54523058,54528249,	complete_match	ENSMMUG00000002060	54419648	54528249	54419648	54540653	+	KIZ-201	KIZ	protein_coding	protein_coding	ENSMMUP00000037400			kizuna centrosomal protein [Source:HGNC Symbol;Acc:HGNC:15865]
mmu_circ_021186	chr10_54618072_54658608_F	circRNA	Yes	chr10	54618072	54658608	+	2275	40536	26	0,2262,2397,3388,3596,4111,5418,5577,5817,5958,10907,12570,16060,18351,20049,20260,20487,20908,21289,26345,27621,28626,29770,37523,37675,40408	112,59,90,73,51,158,75,134,58,108,45,132,119,136,108,46,11,39,73,84,98,80,57,69,132,128	ENSMMUT00000015973	chr10:54616107-54618072|chr10:54658608-54673037	0	2	chr10	+	54593588	54681143	ENSMMUT00000015973	32	54593588,54615784,54615995,54618072,54620334,54620469,54621460,54621668,54622183,54623490,54623649,54623889,54624030,54628979,54630642,54634132,54636423,54638121,54638332,54638559,54638980,54639361,54644417,54645693,54646698,54647842,54655595,54655747,54658480,54673037,54677904,54680617,	54593663,54615912,54616107,54618184,54620393,54620559,54621533,54621719,54622341,54623565,54623783,54623947,54624138,54629024,54630774,54634251,54636559,54638229,54638378,54638570,54639019,54639434,54644501,54645791,54646778,54647899,54655664,54655879,54658608,54673101,54678043,54681143,	complete_match	ENSMMUG00000011405	54593589	54681143	54593589	54681143	+	XRN2-201	XRN2	protein_coding	protein_coding	ENSMMUP00000014968		XP_001094734	5'-3' exoribonuclease 2 [Source:HGNC Symbol;Acc:HGNC:12836]
mmu_circ_021188	chr10_54646698_54655879_F	circRNA	Yes	chr10	54646698	54655879	+	338	9181	4	0,1144,8897,9049	80,57,69,132	ENSMMUT00000015973	chr10:54645791-54646698|chr10:54655879-54658480	0	2	chr10	+	54593588	54681143	ENSMMUT00000015973	32	54593588,54615784,54615995,54618072,54620334,54620469,54621460,54621668,54622183,54623490,54623649,54623889,54624030,54628979,54630642,54634132,54636423,54638121,54638332,54638559,54638980,54639361,54644417,54645693,54646698,54647842,54655595,54655747,54658480,54673037,54677904,54680617,	54593663,54615912,54616107,54618184,54620393,54620559,54621533,54621719,54622341,54623565,54623783,54623947,54624138,54629024,54630774,54634251,54636559,54638229,54638378,54638570,54639019,54639434,54644501,54645791,54646778,54647899,54655664,54655879,54658608,54673101,54678043,54681143,	complete_match	ENSMMUG00000011405	54593589	54681143	54593589	54681143	+	XRN2-201	XRN2	protein_coding	protein_coding	ENSMMUP00000014968		XP_001094734	5'-3' exoribonuclease 2 [Source:HGNC Symbol;Acc:HGNC:12836]
mmu_circ_021190	chr10_58516818_58525295_R	circRNA	Yes	chr10	58516818	58525295	-	303	8477	4	0,2188,5302,8371	46,31,120,106	PREDICTED.17276.1	chr10:58512928-58516818|chr10:58525295-58535323	0	2	chr10	-	58497462	58535770	PREDICTED.17276.1	13	58497462,58505177,58506576,58510183,58511337,58511827,58512798,58516818,58519006,58522120,58525189,58535323,58535708,	58497741,58505305,58506655,58510266,58511417,58511865,58512928,58516864,58519037,58522240,58525295,58535448,58535770,	potentially_novel_isoform
mmu_circ_021191	chr10_58627319_58655602_F	circRNA	Yes	chr10	58627319	58655602	+	382	28283	4	0,1004,9630,28208	99,91,117,75	PREDICTED.59928.1	chr10:58623820-58627319|chr10:58655602-58660761	1	1	chr10	+	58617427	58662717	PREDICTED.59928.1	7	58617427,58623755,58627319,58628323,58636949,58655527,58660761,	58617510,58623820,58627418,58628414,58637066,58655602,58662717,	complete_match
mmu_circ_021193	chr10_62394969_62401831_F	circRNA	Yes	chr10	62394969	62401831	+	236	6862	2	0,6718	92,144	PREDICTED.17466.3	chr10:62388496-62394969|chr10:62401831-62424999	0	2	chr10	+	62388494	62428057	PREDICTED.17466.3	6	62388494,62394969,62401687,62424999,62425431,62427739,	62388496,62395061,62401831,62425426,62425888,62428057,	potentially_novel_isoform
mmu_circ_021194	chr10_62576072_62580587_R	circRNA	Yes	chr10	62576072	62580587	-	240	4515	3	0,1383,4431	57,99,84	PREDICTED.61696.1	chr10:62573262-62576072|chr10:62580587-62582129	3	0	chr10	-	62487985	62602869	PREDICTED.61696.1	35	62487985,62488520,62488724,62506230,62507834,62514512,62515101,62519076,62519678,62520593,62524046,62528895,62538698,62562220,62563223,62569687,62570594,62573154,62576072,62577455,62580503,62582129,62583116,62583269,62584994,62587604,62589954,62591459,62592404,62592882,62595924,62597327,62598356,62599096,62601098,	62488439,62488594,62488824,62506324,62507945,62514607,62516920,62519159,62519819,62520707,62524109,62529146,62538894,62562308,62563312,62569874,62570702,62573262,62576129,62577554,62580587,62582303,62583179,62583382,62585191,62587752,62590051,62591586,62592520,62593140,62596025,62597483,62598458,62599213,62602869,	potentially_novel_isoform
mmu_circ_021195	chr10_6258466_6277866_F	circRNA	Yes	chr10	6258466	6277866	+	571	19400	5	0,1367,7082,18417,19334	107,143,147,108,66	PREDICTED.48687.2	chr10:6244061-6258466|chr10:6277866-6280397	1	1	chr10	+	6213809	6283971	PREDICTED.48687.2	10	6213809,6213978,6243928,6258466,6259833,6265548,6276883,6277800,6280397,6281255,	6213830,6214023,6244061,6258573,6259976,6265695,6276991,6277866,6280556,6283971,	potentially_novel_isoform
mmu_circ_021200	chr10_63231077_63240227_R	circRNA	Yes	chr10	63231077	63240227	-	393	9150	3	0,4290,9000	111,132,150	ENSMMUT00000007648	chr10:63230823-63231077|chr10:63240227-63240300	2	0	chr10	-	63222523	63322566	ENSMMUT00000007648	34	63222523,63223242,63223783,63226434,63230652,63231077,63235367,63240077,63240300,63243511,63246166,63251955,63252719,63254106,63260074,63263584,63265075,63265649,63266385,63267623,63269081,63269844,63273623,63276740,63277423,63277670,63278541,63278652,63282448,63286692,63290135,63300961,63322147,63322524,	63223010,63223291,63223859,63226656,63230823,63231188,63235499,63240227,63240468,63243619,63246331,63252113,63252912,63254290,63260220,63263707,63265310,63265792,63266511,63267787,63269262,63270009,63273761,63276863,63277576,63277860,63278555,63278850,63282622,63286806,63290297,63301230,63322355,63322566,	complete_match	ENSMMUG00000005432	63222524	63322566	63222524	63322566	-	CLTCL1-201	CLTCL1	protein_coding	protein_coding	ENSMMUP00000007184	XM_001112729	XP_001112729	clathrin, heavy chain-like 1 [Source:HGNC Symbol;Acc:HGNC:2093]
mmu_circ_021201	chr10_63240077_63243619_R	circRNA	Yes	chr10	63240077	63243619	-	426	3542	3	0,223,3434	150,168,108	ENSMMUT00000007648	chr10:63235499-63240077|chr10:63243619-63246166	2	0	chr10	-	63222523	63322566	ENSMMUT00000007648	34	63222523,63223242,63223783,63226434,63230652,63231077,63235367,63240077,63240300,63243511,63246166,63251955,63252719,63254106,63260074,63263584,63265075,63265649,63266385,63267623,63269081,63269844,63273623,63276740,63277423,63277670,63278541,63278652,63282448,63286692,63290135,63300961,63322147,63322524,	63223010,63223291,63223859,63226656,63230823,63231188,63235499,63240227,63240468,63243619,63246331,63252113,63252912,63254290,63260220,63263707,63265310,63265792,63266511,63267787,63269262,63270009,63273761,63276863,63277576,63277860,63278555,63278850,63282622,63286806,63290297,63301230,63322355,63322566,	complete_match	ENSMMUG00000005432	63222524	63322566	63222524	63322566	-	CLTCL1-201	CLTCL1	protein_coding	protein_coding	ENSMMUP00000007184	XM_001112729	XP_001112729	clathrin, heavy chain-like 1 [Source:HGNC Symbol;Acc:HGNC:2093]
mmu_circ_021207	chr10_63290135_63290297_R	circRNA	Yes	chr10	63290135	63290297	-	162	162	1	0	162	ENSMMUT00000007648	chr10:63286806-63290135|chr10:63290297-63300961	2	0	chr10	-	63222523	63322566	ENSMMUT00000007648	34	63222523,63223242,63223783,63226434,63230652,63231077,63235367,63240077,63240300,63243511,63246166,63251955,63252719,63254106,63260074,63263584,63265075,63265649,63266385,63267623,63269081,63269844,63273623,63276740,63277423,63277670,63278541,63278652,63282448,63286692,63290135,63300961,63322147,63322524,	63223010,63223291,63223859,63226656,63230823,63231188,63235499,63240227,63240468,63243619,63246331,63252113,63252912,63254290,63260220,63263707,63265310,63265792,63266511,63267787,63269262,63270009,63273761,63276863,63277576,63277860,63278555,63278850,63282622,63286806,63290297,63301230,63322355,63322566,	complete_match	ENSMMUG00000005432	63222524	63322566	63222524	63322566	-	CLTCL1-201	CLTCL1	protein_coding	protein_coding	ENSMMUP00000007184	XM_001112729	XP_001112729	clathrin, heavy chain-like 1 [Source:HGNC Symbol;Acc:HGNC:2093]
mmu_circ_021208	chr10_63300961_63301230_R	circRNA	Yes	chr10	63300961	63301230	-	269	269	1	0	269	ENSMMUT00000007648	chr10:63290297-63300961|chr10:63301230-63322147	3	0	chr10	-	63222523	63322566	ENSMMUT00000007648	34	63222523,63223242,63223783,63226434,63230652,63231077,63235367,63240077,63240300,63243511,63246166,63251955,63252719,63254106,63260074,63263584,63265075,63265649,63266385,63267623,63269081,63269844,63273623,63276740,63277423,63277670,63278541,63278652,63282448,63286692,63290135,63300961,63322147,63322524,	63223010,63223291,63223859,63226656,63230823,63231188,63235499,63240227,63240468,63243619,63246331,63252113,63252912,63254290,63260220,63263707,63265310,63265792,63266511,63267787,63269262,63270009,63273761,63276863,63277576,63277860,63278555,63278850,63282622,63286806,63290297,63301230,63322355,63322566,	complete_match	ENSMMUG00000005432	63222524	63322566	63222524	63322566	-	CLTCL1-201	CLTCL1	protein_coding	protein_coding	ENSMMUP00000007184	XM_001112729	XP_001112729	clathrin, heavy chain-like 1 [Source:HGNC Symbol;Acc:HGNC:2093]
mmu_circ_021213	chr10_65082178_65086679_F	circRNA	Yes	chr10	65082178	65086679	+	211	4501	2	0,4407	117,94	ENSMMUT00000031179	chr10:65062896-65082178|chr10:65086679-65090644	5	3	chr10	+	65062662	65209135	ENSMMUT00000031179	55	65062662,65082178,65086585,65090644,65093709,65094446,65095772,65102261,65104957,65108866,65111381,65112141,65113230,65113394,65114896,65117657,65118146,65118726,65121070,65124164,65152159,65152615,65152901,65157176,65162571,65162722,65164080,65164459,65165834,65168133,65171467,65174417,65174810,65183139,65183545,65183896,65184639,65186917,65187217,65187422,65189817,65190295,65191150,65196978,651…	65062896,65082295,65086679,65090733,65093782,65094706,65095839,65102410,65105023,65108963,65111573,65112242,65113373,65113403,65115004,65117753,65118330,65118830,65121239,65124215,65152268,65152752,65153035,65157259,65162642,65162847,65164162,65164543,65165924,65168253,65171560,65174574,65174938,65183298,65183697,65184004,65184767,65187037,65187297,65187616,65189908,65190463,65191204,65197099,651…	complete_match	ENSMMUG00000022167	65062663	65209135	65062663	65209135	+	PI4KA-201	PI4KA	protein_coding	protein_coding	ENSMMUP00000029182		XP_001086542	phosphatidylinositol 4-kinase, catalytic, alpha [Source:HGNC Symbol;Acc:HGNC:8983]
mmu_circ_021219	chr10_65546374_65546923_R	circRNA	Yes	chr10	65546374	65546923	-	247	549	2	0,434	132,115	PREDICTED.61465.1	chr10:65529192-65546374|chr10:65546923-65556310	2	0	chr10	-	65513447	65624947	PREDICTED.61465.1	9	65513447,65525020,65529082,65546374,65546808,65556310,65562889,65565004,65624599,	65518947,65525146,65529192,65546506,65546923,65556427,65563079,65565187,65624947,	complete_match
mmu_circ_021221	chr10_65725421_65728203_R	circRNA	Yes	chr10	65725421	65728203	-	379	2782	3	0,1621,2675	197,75,107	ENSMMUT00000044225	chr10:65723996-65725421|chr10:65728203-65730172	1	1	chr10	-	65712000	65738629	ENSMMUT00000044225	18	65712000,65713522,65714162,65714561,65715295,65717389,65717709,65718892,65719130,65720491,65722832,65723839,65725421,65727042,65728096,65730172,65731482,65738542,	65712014,65713724,65714263,65714711,65715424,65717563,65717856,65718998,65719285,65720582,65722946,65723996,65725618,65727117,65728203,65730304,65731650,65738629,	complete_match	ENSMMUG00000014487	65712001	65738629	65712001	65738629	-	TOP3B-201	TOP3B	protein_coding	protein_coding	ENSMMUP00000037239			DNA topoisomerase [Source:UniProtKB/TrEMBL;Acc:F6QNQ6]
mmu_circ_021222	chr10_66206_69832_R	circRNA	Yes	chr10	66206	69832	-	399	3626	3	0,2575,3523	124,172,103	PREDICTED.13380.2	chr10:61403-66206|chr10:69832-73939	1	1	chr10	-	58469	77982	PREDICTED.13380.2	5	58469,66206,68781,69729,73939,	61403,66330,68953,69832,77982,	complete_match
mmu_circ_021225	chr10_67743455_67753300_F	circRNA	Yes	chr10	67743455	67753300	+	506	9845	4	0,1725,5601,9753	74,176,164,92	PREDICTED.17744.2	chr10:67738198-67743455|chr10:67753300-67761933	0	2	chr10	+	67684575	67785293	PREDICTED.17744.2	13	67684575,67720865,67729416,67734756,67737990,67743455,67745180,67749056,67753208,67761933,67778506,67780674,67784695,	67684730,67721055,67729570,67736387,67738198,67743529,67745356,67749220,67753300,67762024,67778590,67780831,67785293,	potentially_novel_isoform
mmu_circ_021227	chr10_68781_69832_R	circRNA	Yes	chr10	68781	69832	-	275	1051	2	0,948	172,103	PREDICTED.13380.2	chr10:66330-68781|chr10:69832-73939	2	0	chr10	-	58469	77982	PREDICTED.13380.2	5	58469,66206,68781,69729,73939,	61403,66330,68953,69832,77982,	complete_match
mmu_circ_021229	chr10_69486343_69500149_F	circRNA	Yes	chr10	69486343	69500149	+	483	13806	6	0,2354,6168,10957,12839,13706	102,75,62,52,92,100	PREDICTED.62169.1	chr10:69469441-69486343|chr10:69500149-69507356	2	0	chr10	+	69427573	69509947	PREDICTED.62169.1	10	69427573,69469367,69486343,69488697,69492511,69497300,69499182,69500049,69507356,69509730,	69427652,69469441,69486445,69488772,69492573,69497352,69499274,69500149,69507435,69509947,	potentially_novel_isoform
mmu_circ_021234	chr10_69650702_69656162_F	circRNA	Yes	chr10	69650702	69656162	+	455	5460	3	0,2916,5267	174,88,193	ENSMMUT00000004711	chr10:69624765-69650702|chr10:69656162-69660072	2	0	chr10	+	69585607	69860215	ENSMMUT00000004711	44	69585607,69587744,69593169,69595174,69595987,69597426,69602693,69606174,69607824,69611701,69624620,69650702,69653618,69655969,69660072,69662705,69671962,69674649,69675988,69680006,69697045,69703177,69705072,69707076,69720246,69720793,69724618,69727759,69732041,69733062,69737763,69740398,69740523,69764695,69771429,69774960,69776493,69779484,69781411,69784302,69822802,69834424,69835879,69858987,	69585646,69587903,69594483,69595241,69596100,69597603,69602892,69606317,69607925,69611765,69624765,69650876,69653706,69656162,69660153,69662853,69672122,69674833,69676211,69680116,69697111,69703306,69705216,69707166,69720366,69720902,69724743,69727914,69732165,69733263,69737874,69740518,69740610,69764727,69771448,69775074,69776610,69779568,69781549,69784488,69822933,69834469,69836017,69860215,	complete_match	ENSMMUG00000003334	69585608	69860215	69585608	69863592	+	MYO18B-201	MYO18B	protein_coding	protein_coding	ENSMMUP00000004443	XM_001104626	XP_001104626	myosin XVIIIB [Source:HGNC Symbol;Acc:HGNC:18150]
mmu_circ_021239	chr10_69737763_69779568_F	circRNA	Yes	chr10	69737763	69779568	+	684	41805	8	0,2635,2760,26932,33666,37197,38730,41721	111,120,87,32,19,114,117,84	ENSMMUT00000004711	chr10:69733263-69737763|chr10:69779568-69781411	2	2	chr10	+	69585607	69860215	ENSMMUT00000004711	44	69585607,69587744,69593169,69595174,69595987,69597426,69602693,69606174,69607824,69611701,69624620,69650702,69653618,69655969,69660072,69662705,69671962,69674649,69675988,69680006,69697045,69703177,69705072,69707076,69720246,69720793,69724618,69727759,69732041,69733062,69737763,69740398,69740523,69764695,69771429,69774960,69776493,69779484,69781411,69784302,69822802,69834424,69835879,69858987,	69585646,69587903,69594483,69595241,69596100,69597603,69602892,69606317,69607925,69611765,69624765,69650876,69653706,69656162,69660153,69662853,69672122,69674833,69676211,69680116,69697111,69703306,69705216,69707166,69720366,69720902,69724743,69727914,69732165,69733263,69737874,69740518,69740610,69764727,69771448,69775074,69776610,69779568,69781549,69784488,69822933,69834469,69836017,69860215,	complete_match	ENSMMUG00000003334	69585608	69860215	69585608	69863592	+	MYO18B-201	MYO18B	protein_coding	protein_coding	ENSMMUP00000004443	XM_001104626	XP_001104626	myosin XVIIIB [Source:HGNC Symbol;Acc:HGNC:18150]
mmu_circ_021240	chr10_69834424_69836017_F	circRNA	Yes	chr10	69834424	69836017	+	183	1593	2	0,1455	45,138	ENSMMUT00000004711	chr10:69822933-69834424|chr10:69836017-69858987	0	2	chr10	+	69585607	69860215	ENSMMUT00000004711	44	69585607,69587744,69593169,69595174,69595987,69597426,69602693,69606174,69607824,69611701,69624620,69650702,69653618,69655969,69660072,69662705,69671962,69674649,69675988,69680006,69697045,69703177,69705072,69707076,69720246,69720793,69724618,69727759,69732041,69733062,69737763,69740398,69740523,69764695,69771429,69774960,69776493,69779484,69781411,69784302,69822802,69834424,69835879,69858987,	69585646,69587903,69594483,69595241,69596100,69597603,69602892,69606317,69607925,69611765,69624765,69650876,69653706,69656162,69660153,69662853,69672122,69674833,69676211,69680116,69697111,69703306,69705216,69707166,69720366,69720902,69724743,69727914,69732165,69733263,69737874,69740518,69740610,69764727,69771448,69775074,69776610,69779568,69781549,69784488,69822933,69834469,69836017,69860215,	complete_match	ENSMMUG00000003334	69585608	69860215	69585608	69863592	+	MYO18B-201	MYO18B	protein_coding	protein_coding	ENSMMUP00000004443	XM_001104626	XP_001104626	myosin XVIIIB [Source:HGNC Symbol;Acc:HGNC:18150]
mmu_circ_021242	chr10_72526939_72532130_R	circRNA	Yes	chr10	72526939	72532130	-	351	5191	3	0,1214,5091	164,87,100	PREDICTED.62814.1	chr10:72526471-72526939|chr10:72532130-72535343	2	0	chr10	-	72519260	72569021	PREDICTED.62814.1	15	72519260,72520638,72525257,72526355,72526939,72528153,72532030,72535343,72542183,72544074,72552009,72556195,72556461,72565317,72568713,	72519503,72520725,72525343,72526471,72527103,72528240,72532130,72535405,72542237,72544183,72552100,72556343,72556586,72565642,72569021,	potentially_novel_isoform
mmu_circ_021244	chr10_72556195_72556586_R	circRNA	Yes	chr10	72556195	72556586	-	273	391	2	0,266	148,125	PREDICTED.62814.1	chr10:72552100-72556195|chr10:72556586-72565317	2	1	chr10	-	72519260	72569021	PREDICTED.62814.1	15	72519260,72520638,72525257,72526355,72526939,72528153,72532030,72535343,72542183,72544074,72552009,72556195,72556461,72565317,72568713,	72519503,72520725,72525343,72526471,72527103,72528240,72532130,72535405,72542237,72544183,72552100,72556343,72556586,72565642,72569021,	potentially_novel_isoform
mmu_circ_021245	chr10_72625393_72625672_R	ciRNA	Yes	chr10	72625393	72625672	-	279	279	1	0	279	PREDICTED.17901.1	chr10:72625357-72625672	0	3	chr10	-	72623844	72631487	PREDICTED.17901.1	5	72623844,72625672,72627748,72629954,72631200,	72625357,72625818,72627877,72630051,72631487,	potentially_novel_isoform
mmu_circ_021248	chr10_72923837_72956387_F	circRNA	Yes	chr10	72923837	72956387	+	534	32550	4	0,4617,28497,32396	163,92,125,154	PREDICTED.62882.1	chr10:72901682-72923837|chr10:72956387-72967187	2	0	chr10	+	72901645	72971242	PREDICTED.62882.1	9	72901645,72923837,72928454,72952334,72956233,72967187,72967900,72969557,72971182,	72901682,72924000,72928546,72952459,72956387,72967520,72968059,72969642,72971242,	potentially_novel_isoform
mmu_circ_021251	chr10_73387154_73387431_R	ciRNA	Yes	chr10	73387154	73387431	-	277	277	1	0	277	ENSMMUT00000044113	chr10:73387130-73387431	0	3	chr10	-	73385196	73388127	ENSMMUT00000044113	5	73385196,73387035,73387431,73387769,73388055,	73385240,73387130,73387463,73387910,73388127,	complete_match	ENSMMUG00000031041	73385197	73388127	73385197	73388127	-	NIPSNAP1-201	NIPSNAP1	protein_coding	protein_coding	ENSMMUP00000037119	XM_001109577	XP_001109577	nipsnap homolog 1 (C. elegans) [Source:HGNC Symbol;Acc:HGNC:7827]
mmu_circ_021253	chr10_73668731_73677935_R	circRNA	Yes	chr10	73668731	73677935	-	422	9204	4	0,1252,2587,9074	113,111,68,130	ENSMMUT00000002379	chr10:73663423-73668731|chr10:73677935-73680694	2	1	chr10	-	73642420	73694153	ENSMMUT00000002379	20	73642420,73644310,73646260,73647213,73647430,73655257,73656279,73659218,73661441,73661711,73662022,73663348,73668731,73669983,73671318,73677805,73680694,73681228,73687806,73694053,	73643038,73644390,73646360,73647344,73647530,73655377,73656494,73659399,73661516,73661780,73662130,73663423,73668844,73670094,73671386,73677935,73680865,73681387,73687904,73694153,	complete_match	ENSMMUG00000001675	73642421	73694153	73642421	73694153	-	ASCC2-201	ASCC2	protein_coding	protein_coding	ENSMMUP00000002250	XM_001107066	XP_001107066	activating signal cointegrator 1 complex subunit 2 [Source:HGNC Symbol;Acc:HGNC:24103]
mmu_circ_021255	chr10_73813807_73858884_F	circRNA	Yes	chr10	73813807	73858884	+	808	45077	8	0,14094,21542,22050,30739,33617,41211,44963	53,87,90,117,83,167,97,114	PREDICTED.18088.1	chr10:73742398-73813807|chr10:73858884-73863022	0	2	chr10	+	73742217	73874406	PREDICTED.18088.1	15	73742217,73813807,73827901,73835349,73835857,73844546,73847424,73855018,73858770,73863022,73864111,73865220,73868535,73869530,73873056,	73742398,73813860,73827988,73835439,73835974,73844629,73847591,73855115,73858884,73863228,73864243,73865332,73868731,73869716,73874406,	potentially_novel_isoform
mmu_circ_021259	chr10_73855018_73858884_F	circRNA	Yes	chr10	73855018	73858884	+	211	3866	2	0,3752	97,114	PREDICTED.18088.1	chr10:73847591-73855018|chr10:73858884-73863022	2	0	chr10	+	73742217	73874406	PREDICTED.18088.1	15	73742217,73813807,73827901,73835349,73835857,73844546,73847424,73855018,73858770,73863022,73864111,73865220,73868535,73869530,73873056,	73742398,73813860,73827988,73835439,73835974,73844629,73847591,73855115,73858884,73863228,73864243,73865332,73868731,73869716,73874406,	potentially_novel_isoform
mmu_circ_021264	chr10_75348491_75350319_R	circRNA	Yes	chr10	75348491	75350319	-	549	1828	3	0,990,1692	233,180,136	PREDICTED.63304.1	chr10:75344470-75348491|chr10:75350319-75357347	2	0	chr10	-	75332874	75389473	PREDICTED.63304.1	16	75332874,75334363,75335416,75336607,75338331,75341528,75342239,75343455,75344398,75348491,75349481,75350183,75357347,75368066,75371834,75389081,	75333780,75334528,75335761,75336740,75338416,75341668,75342319,75343639,75344470,75348724,75349661,75350319,75357523,75368194,75371908,75389473,	potentially_novel_isoform
mmu_circ_021268	chr10_75610210_75615416_R	circRNA	Yes	chr10	75610210	75615416	-	5206	5206	1	0	5206	ENSMMUT00000029176	chr10:75602438-75610210|chr10:75615416-75622592	0	2	chr10	-	75576217	75637088	ENSMMUT00000029176	8	75576217,75584136,75598778,75601271,75602366,75610210,75622592,75636653,	75580653,75584208,75598885,75601443,75602438,75615416,75622665,75637088,	complete_match	ENSMMUG00000020746	75576218	75637088	75576218	75637088	-	PRR14L-201	PRR14L	protein_coding	protein_coding	ENSMMUP00000027298	XM_001111917	XP_001111917	proline rich 14-like [Source:HGNC Symbol;Acc:HGNC:28738]
mmu_circ_021269	chr10_75656229_75666809_F	circRNA	Yes	chr10	75656229	75666809	+	221	10580	3	0,1642,10494	88,47,86	PREDICTED.63323.1	chr10:75652448-75656229|chr10:75666809-75668410	1	2	chr10	+	75651451	75698133	PREDICTED.63323.1	13	75651451,75652330,75656229,75657871,75666723,75668410,75670335,75677751,75683696,75684624,75691745,75692720,75697831,	75651462,75652448,75656317,75657918,75666809,75668494,75670385,75677821,75683775,75684686,75691815,75692793,75698133,	potentially_novel_isoform
mmu_circ_021270	chr10_75656229_75670385_F	circRNA	Yes	chr10	75656229	75670385	+	355	14156	5	0,1642,10494,12181,14106	88,47,86,84,50	PREDICTED.63323.1	chr10:75652448-75656229|chr10:75670385-75677751	0	2	chr10	+	75651451	75698133	PREDICTED.63323.1	13	75651451,75652330,75656229,75657871,75666723,75668410,75670335,75677751,75683696,75684624,75691745,75692720,75697831,	75651462,75652448,75656317,75657918,75666809,75668494,75670385,75677821,75683775,75684686,75691815,75692793,75698133,	potentially_novel_isoform
mmu_circ_021272	chr10_76355172_76359324_R	circRNA	Yes	chr10	76355172	76359324	-	470	4152	4	0,1019,2357,3975	68,171,54,177	PREDICTED.63505.3	chr10:76339084-76355172|chr10:76359324-76361015	3	0	chr10	-	76338255	76378061	PREDICTED.63505.3	11	76338255,76355172,76356191,76357529,76359147,76361015,76365997,76368651,76370219,76376136,76377799,	76339084,76355240,76356362,76357583,76359324,76361107,76366058,76369005,76370348,76376257,76378061,	potentially_novel_isoform
mmu_circ_021276	chr10_79671704_79672156_R	ciRNA	Yes	chr10	79671704	79672156	-	452	452	1	0	452	PREDICTED.64875.2	chr10:79671679-79672156	3	0	chr10	-	79664502	79777581	PREDICTED.64875.2	12	79664502,79671606,79672156,79685640,79686927,79687141,79691233,79694060,79702346,79708142,79737564,79777069,	79669956,79671679,79672245,79685773,79687020,79687195,79691294,79694153,79704309,79708286,79737789,79777581,	potentially_novel_isoform
mmu_circ_021281	chr10_81850628_81852095_F	circRNA	Yes	chr10	81850628	81852095	+	232	1467	2	0,1324	89,143	PREDICTED.64346.1	chr10:81846487-81850628|chr10:81852095-81856131	1	1	chr10	+	81838313	81875728	PREDICTED.64346.1	25	81838313,81842141,81845392,81846281,81846463,81850628,81851952,81856131,81859046,81860066,81860533,81860726,81861107,81861182,81864604,81864734,81864918,81865756,81866232,81867001,81867246,81867486,81871407,81872076,81873954,	81838432,81842185,81845459,81846340,81846487,81850717,81852095,81856586,81859104,81860449,81860553,81861036,81861129,81861226,81864645,81864754,81864924,81865769,81866367,81867128,81867337,81867560,81871522,81872123,81875728,	potentially_novel_isoform
mmu_circ_021285	chr10_84051211_84089795_F	circRNA	Yes	chr10	84051211	84089795	+	233	38584	3	0,8657,38516	74,91,68	PREDICTED.66082.1	chr10:84042976-84051211|chr10:84089795-84185884	11	0	chr10	+	84042673	84248809	PREDICTED.66082.1	18	84042673,84051211,84059868,84089727,84185884,84190897,84201065,84203609,84212655,84216645,84217571,84219566,84224856,84237237,84237703,84237943,84246024,84248327,	84042976,84051285,84059959,84089795,84185972,84190919,84201407,84205958,84212831,84216720,84217617,84219715,84224982,84237369,84237799,84238124,84246162,84248809,	potentially_novel_isoform
mmu_circ_021287	chr10_84216645_84224982_F	circRNA	Yes	chr10	84216645	84224982	+	396	8337	4	0,926,2921,8211	75,46,149,126	PREDICTED.66082.1	chr10:84212831-84216645|chr10:84224982-84237237	5	0	chr10	+	84042673	84248809	PREDICTED.66082.1	18	84042673,84051211,84059868,84089727,84185884,84190897,84201065,84203609,84212655,84216645,84217571,84219566,84224856,84237237,84237703,84237943,84246024,84248327,	84042976,84051285,84059959,84089795,84185972,84190919,84201407,84205958,84212831,84216720,84217617,84219715,84224982,84237369,84237799,84238124,84246162,84248809,	potentially_novel_isoform
mmu_circ_021288	chr10_84347571_84347820_R	ciRNA	Yes	chr10	84347571	84347820	-	249	249	1	0	249	ENSMMUT00000028708	chr10:84347550-84347820	2	1	chr10	-	84338022	84362725	ENSMMUT00000028708	12	84338022,84343943,84344039,84344295,84345359,84347378,84347820,84350508,84351175,84356543,84358313,84362665,	84338540,84344004,84344040,84344446,84346382,84347550,84348074,84350658,84351351,84356705,84358389,84362725,	complete_match	ENSMMUG00000020411	84338023	84362725	84338023	84362725	-	MKL1-201	MKL1	protein_coding	protein_coding	ENSMMUP00000026861			megakaryoblastic leukemia (translocation) 1 [Source:HGNC Symbol;Acc:HGNC:14334]
mmu_circ_021299	chr10_85279134_85280638_F	circRNA	Yes	chr10	85279134	85280638	+	391	1504	3	0,157,1345	34,198,159	PREDICTED.65322.1	chr10:85274281-85279134|chr10:85280638-85286048	0	2	chr10	+	85254478	85317766	PREDICTED.65322.1	21	85254478,85274222,85279134,85279291,85280479,85286048,85287575,85295420,85296147,85296957,85298248,85299696,85300651,85303565,85305680,85306702,85306929,85314090,85314582,85314919,85315451,	85254688,85274281,85279168,85279489,85280638,85286129,85287632,85295463,85296338,85297279,85298307,85299796,85300813,85303771,85305781,85306917,85307077,85314299,85314716,85315083,85317766,	potentially_novel_isoform
mmu_circ_021301	chr10_85299696_85300813_F	circRNA	Yes	chr10	85299696	85300813	+	262	1117	2	0,955	100,162	PREDICTED.65322.1	chr10:85298307-85299696|chr10:85300813-85303565	4	0	chr10	+	85254478	85317766	PREDICTED.65322.1	21	85254478,85274222,85279134,85279291,85280479,85286048,85287575,85295420,85296147,85296957,85298248,85299696,85300651,85303565,85305680,85306702,85306929,85314090,85314582,85314919,85315451,	85254688,85274281,85279168,85279489,85280638,85286129,85287632,85295463,85296338,85297279,85298307,85299796,85300813,85303771,85305781,85306917,85307077,85314299,85314716,85315083,85317766,	potentially_novel_isoform
mmu_circ_021308	chr10_86812016_86815912_R	circRNA	Yes	chr10	86812016	86815912	-	304	3896	3	0,2638,3764	88,84,132	ENSMMUT00000043949	chr10:86807381-86812016|chr10:86815912-86820992	0	2	chr10	-	86773000	86838976	ENSMMUT00000043949	16	86773000,86775477,86783978,86785605,86790338,86796681,86797556,86802043,86803393,86807321,86812016,86814654,86815780,86820992,86828017,86838839,	86774048,86775599,86784069,86785729,86790470,86796804,86797685,86802183,86803440,86807381,86812104,86814738,86815912,86821065,86828136,86838976,	complete_match	ENSMMUG00000002229	86773001	86838976	86772995	86838976	-	ARFGAP3-202	ARFGAP3	protein_coding	protein_coding	ENSMMUP00000036946	XM_001107803	XP_001107803	ADP-ribosylation factor GTPase-activating protein 3 isoform 1; Uncharacterized protein [Source:UniProtKB/TrEMBL;Acc:F6XXI0]
mmu_circ_021309	chr10_86820992_86828136_R	circRNA	Yes	chr10	86820992	86828136	-	192	7144	2	0,7025	73,119	ENSMMUT00000043949	chr10:86815912-86820992|chr10:86828136-86838839	1	2	chr10	-	86773000	86838976	ENSMMUT00000043949	16	86773000,86775477,86783978,86785605,86790338,86796681,86797556,86802043,86803393,86807321,86812016,86814654,86815780,86820992,86828017,86838839,	86774048,86775599,86784069,86785729,86790470,86796804,86797685,86802183,86803440,86807381,86812104,86814738,86815912,86821065,86828136,86838976,	complete_match	ENSMMUG00000002229	86773001	86838976	86772995	86838976	-	ARFGAP3-202	ARFGAP3	protein_coding	protein_coding	ENSMMUP00000036946	XM_001107803	XP_001107803	ADP-ribosylation factor GTPase-activating protein 3 isoform 1; Uncharacterized protein [Source:UniProtKB/TrEMBL;Acc:F6XXI0]
mmu_circ_021310	chr10_87042420_87042932_R	circRNA	Yes	chr10	87042420	87042932	-	244	512	2	0,377	109,135	PREDICTED.65766.2	chr10:87037382-87042420|chr10:87042932-87043765	2	0	chr10	-	87033996	87045238	PREDICTED.65766.2	6	87033996,87037237,87042420,87042797,87043765,87044984,	87034321,87037382,87042529,87042932,87043946,87045238,	potentially_novel_isoform
mmu_circ_021311	chr10_87156104_87159073_R	circRNA	Yes	chr10	87156104	87159073	-	501	2969	4	0,496,786,2892	112,195,117,77	PREDICTED.65895.1	chr10:87154765-87156104|chr10:87159073-87161929	2	0	chr10	-	87148577	87163674	PREDICTED.65895.1	12	87148577,87150873,87151609,87154051,87154613,87156104,87156600,87156890,87158996,87161929,87162151,87163039,	87150274,87151012,87151678,87154133,87154765,87156216,87156795,87157007,87159073,87162063,87162311,87163674,	potentially_novel_isoform
mmu_circ_021313	chr10_89333355_89335480_F	circRNA	Yes	chr10	89333355	89335480	+	415	2125	2	0,1839	129,286	PREDICTED.66580.3	chr10:89330264-89333355|chr10:89335480-89338216	1	2	chr10	+	89312488	89339987	PREDICTED.66580.3	9	89312488,89324702,89325528,89329857,89330042,89333355,89335194,89338216,89339190,	89312750,89324758,89325771,89329865,89330264,89333484,89335480,89338249,89339987,	potentially_novel_isoform
mmu_circ_021314	chr10_89688915_89701345_F	circRNA	Yes	chr10	89688915	89701345	+	531	12430	4	0,3254,9869,12271	192,83,97,159	PREDICTED.66861.2	chr10:89670619-89688915|chr10:89701345-89716747	7	0	chr10	+	89670265	89807005	PREDICTED.66861.2	10	89670265,89688915,89692169,89698784,89701186,89716747,89728076,89737317,89739164,89806309,	89670619,89689107,89692252,89698881,89701345,89716828,89728242,89737426,89739334,89807005,	potentially_novel_isoform
mmu_circ_021318	chr10_90208630_90208877_F	circRNA	Yes	chr10	90208630	90208877	+	247	247	1	0	247	PREDICTED.66786.2	chr10:90152137-90208630|chr10:90208877-90223396	3	0	chr10	+	90151935	90245901	PREDICTED.66786.2	7	90151935,90208630,90223396,90226505,90228349,90241185,90244822,	90152137,90208877,90223557,90226644,90228552,90241633,90245901,	potentially_novel_isoform
mmu_circ_021319	chr10_90226505_90228552_F	circRNA	Yes	chr10	90226505	90228552	+	342	2047	2	0,1844	139,203	PREDICTED.66786.2	chr10:90223557-90226505|chr10:90228552-90241185	4	0	chr10	+	90151935	90245901	PREDICTED.66786.2	7	90151935,90208630,90223396,90226505,90228349,90241185,90244822,	90152137,90208877,90223557,90226644,90228552,90241633,90245901,	potentially_novel_isoform
mmu_circ_021321	chr10_94119201_94132404_F	circRNA	Yes	chr10	94119201	94132404	+	651	13203	5	0,4526,9755,10896,13111	195,115,178,71,92	ENSMMUT00000043893	chr10:94117356-94119201|chr10:94132404-94139507	2	0	chr10	+	94116635	94163831	ENSMMUT00000043893	16	94116635,94117223,94119201,94123727,94128956,94130097,94132312,94139507,94140364,94147853,94148825,94149874,94151537,94154279,94157701,94163651,	94116680,94117356,94119396,94123842,94129134,94130168,94132404,94139566,94140465,94147962,94149004,94150021,94151659,94154379,94157875,94163831,	complete_match	ENSMMUG00000009120	94116636	94163831	94111499	94167765	+	MOV10L1-203	MOV10L1	protein_coding	protein_coding	ENSMMUP00000036885			Mov10 RISC complex RNA helicase like 1 [Source:HGNC Symbol;Acc:HGNC:7201]
mmu_circ_021325	chr10_94139507_94140465_F	circRNA	Yes	chr10	94139507	94140465	+	160	958	2	0,857	59,101	ENSMMUT00000043893	chr10:94132404-94139507|chr10:94140465-94147853	3	0	chr10	+	94116635	94163831	ENSMMUT00000043893	16	94116635,94117223,94119201,94123727,94128956,94130097,94132312,94139507,94140364,94147853,94148825,94149874,94151537,94154279,94157701,94163651,	94116680,94117356,94119396,94123842,94129134,94130168,94132404,94139566,94140465,94147962,94149004,94150021,94151659,94154379,94157875,94163831,	complete_match	ENSMMUG00000009120	94116636	94163831	94111499	94167765	+	MOV10L1-203	MOV10L1	protein_coding	protein_coding	ENSMMUP00000036885			Mov10 RISC complex RNA helicase like 1 [Source:HGNC Symbol;Acc:HGNC:7201]
mmu_circ_021329	chr10_94254134_94254269_R	ciRNA	Yes	chr10	94254134	94254269	-	135	135	1	0	135	PREDICTED.67279.5	chr10:94254114-94254269	3	0	chr10	-	94250039	94255779	PREDICTED.67279.5	18	94250039,94250388,94250775,94251153,94251349,94252184,94252719,94252860,94253156,94253325,94253594,94253757,94254045,94254269,94254472,94254835,94255165,94255368,	94250306,94250571,94250854,94251210,94251441,94252641,94252787,94252967,94253246,94253385,94253660,94253884,94254114,94254374,94254570,94254932,94255300,94255779,	potentially_novel_isoform
mmu_circ_021333	chr11_100432554_100435080_R	circRNA	Yes	chr11	100432554	100435080	-	663	2526	2	0,1936	73,590	ENSMMUT00000045794	chr11:100342257-100432554|chr11:100435080-100601838	0	3	chr11	-	99920394	101207299	ENSMMUT00000045794	26	99920394,99936147,99958103,99966485,99966712,99985033,99987392,100015780,100018588,100238415,100271085,100342150,100432554,100434490,100601838,100652756,100711438,100857157,100979904,100983576,100987573,100989770,101015260,101021017,101034205,101207165,	99920469,99936315,99958241,99966572,99966720,99985109,99987521,100015960,100018696,100238568,100271184,100342257,100432627,100435080,100602019,100652893,100711604,100857301,100980071,100983690,100987675,100989846,101015557,101021174,101034286,101207299,	complete_match	ENSMMUG00000022406	99920395	101207299	99920395	101207462	-	ANKS1B-202	ANKS1B	protein_coding	protein_coding	ENSMMUP00000038840	XM_001084858	XP_001084858	Amyloid-beta protein intracellular domain-associated protein 1; Uncharacterized protein [Source:UniProtKB/TrEMBL;Acc:F6U0T1]
mmu_circ_021337	chr11_101276818_101289402_R	circRNA	Yes	chr11	101276818	101289402	-	2532	12584	7	0,405,2565,3472,10100,10558,12390	109,254,151,143,176,1505,194	PREDICTED.25570.1	chr11:101269066-101276818|chr11:101289402-101302944	0	3	chr11	-	101266159	101378216	PREDICTED.25570.1	21	101266159,101268872,101276818,101277223,101279383,101280290,101286918,101287376,101289208,101302944,101313386,101314846,101316625,101319279,101325938,101327634,101328620,101333064,101334218,101339429,101377967,	101267029,101269066,101276927,101277477,101279534,101280433,101287094,101288881,101289402,101303086,101313505,101315029,101316709,101319460,101326109,101327775,101328810,101333156,101334257,101339592,101378216,	potentially_novel_isoform
mmu_circ_021339	chr11_101327634_101334257_R	circRNA	Yes	chr11	101327634	101334257	-	462	6623	4	0,986,5430,6584	141,190,92,39	ENSMMUT00000033205	chr11:101326109-101327634|chr11:101334257-101339429	4	0	chr11	-	101266349	101339594	ENSMMUT00000033205	20	101266349,101268872,101276818,101277223,101279383,101280290,101286918,101287376,101289208,101302944,101313386,101314846,101316625,101319279,101325938,101327634,101328620,101333064,101334218,101339429,	101267029,101269066,101276927,101277477,101279534,101280433,101287094,101288881,101289402,101303086,101313505,101315029,101316709,101319460,101326109,101327775,101328810,101333156,101334257,101339594,	complete_match	ENSMMUG00000023601	101266350	101339594	101266350	101339594	-	UHRF1BP1L-201	UHRF1BP1L	protein_coding	protein_coding	ENSMMUP00000031074	XM_001088354	XP_001088354	UHRF1 binding protein 1-like [Source:HGNC Symbol;Acc:HGNC:29102]
mmu_circ_021341	chr11_101440748_101441559_F	circRNA	Yes	chr11	101440748	101441559	+	187	811	2	0,742	118,69	PREDICTED.88158.2	chr11:101437011-101440748|chr11:101441559-101443483	4	0	chr11	+	101436749	101456256	PREDICTED.88158.2	10	101436749,101440748,101441490,101443483,101445898,101446120,101448068,101448262,101454429,101456028,	101437011,101440866,101441559,101443607,101446034,101446177,101448167,101448341,101454601,101456256,	potentially_novel_isoform
mmu_circ_021344	chr11_102544407_102545041_F	circRNA	Yes	chr11	102544407	102545041	+	348	634	3	0,328,481	144,51,153	PREDICTED.25714.3	chr11:102542284-102544407|chr11:102545041-102546995	0	2	chr11	+	102479388	102571021	PREDICTED.25714.3	49	102479388,102480360,102484924,102485103,102485673,102488318,102489439,102490034,102491112,102491340,102492466,102494773,102498758,102499049,102501681,102505119,102505902,102507050,102508647,102510583,102510892,102515988,102518043,102519633,102520286,102526299,102528462,102534995,102536115,102539742,102540484,102542196,102544407,102544735,102544888,102546995,102547960,102548837,102554424,102554812…	102479577,102480441,102484991,102485236,102485862,102488400,102489577,102490190,102491259,102491475,102492544,102494952,102498914,102499138,102501787,102505270,102505965,102507209,102508724,102510663,102511133,102516174,102518134,102519719,102520412,102526466,102528671,102535139,102536195,102539969,102540629,102542284,102544551,102544786,102545041,102547151,102548101,102548975,102554564,102554895…	potentially_novel_isoform
mmu_circ_021346	chr11_102807398_102822268_F	circRNA	Yes	chr11	102807398	102822268	+	495	14870	6	0,9439,10344,12014,14301,14752	42,39,36,111,149,118	PREDICTED.91505.1	chr11:102804382-102807398|chr11:102822268-102824976	2	0	chr11	+	102784853	102877873	PREDICTED.91505.1	29	102784853,102804346,102807398,102816837,102817742,102819412,102821699,102822150,102824976,102827079,102832951,102835205,102837295,102838578,102839662,102841626,102843072,102843508,102856596,102858079,102859427,102860503,102864806,102867640,102870671,102872513,102874494,102875342,102877580,	102784980,102804382,102807440,102816876,102817778,102819523,102821848,102822268,102825028,102827136,102833118,102835338,102837420,102838684,102839829,102841789,102843179,102843642,102856756,102858184,102859616,102860638,102864974,102867729,102870867,102872653,102874654,102875479,102877873,	potentially_novel_isoform
mmu_circ_021352	chr11_102832951_102870867_F	circRNA	Yes	chr11	102832951	102870867	+	2144	37916	15	0,2254,4344,5627,6711,8675,10121,10557,23645,25128,26476,27552,31855,34689,37720	167,133,125,106,167,163,107,134,160,105,189,135,168,89,196	ENSMMUT00000045752	chr11:102827136-102832951|chr11:102870867-102872513	0	2	chr11	+	102784856	102883486	ENSMMUT00000045752	31	102784856,102804346,102807398,102816837,102817742,102819412,102821699,102822150,102824976,102827079,102832951,102835205,102837295,102838578,102839662,102841626,102843072,102843508,102856596,102858079,102859427,102860503,102864806,102867640,102870671,102872513,102874494,102875342,102877580,102881999,102883198,	102784980,102804382,102807440,102816876,102817778,102819523,102821848,102822268,102825028,102827136,102833118,102835338,102837420,102838684,102839829,102841789,102843179,102843642,102856756,102858184,102859616,102860638,102864974,102867729,102870867,102872653,102874654,102875479,102877767,102882042,102883486,	complete_match	ENSMMUG00000020875	102784857	102883486	102784857	102883486	+	MYBPC1-201	MYBPC1	protein_coding	protein_coding	ENSMMUP00000038797			myosin binding protein C, slow type [Source:HGNC Symbol;Acc:HGNC:7549]
mmu_circ_021353	chr11_102835205_102841789_F	circRNA	Yes	chr11	102835205	102841789	+	694	6584	5	0,2090,3373,4457,6421	133,125,106,167,163	PREDICTED.91505.1	chr11:102833118-102835205|chr11:102841789-102843072	2	1	chr11	+	102784853	102877873	PREDICTED.91505.1	29	102784853,102804346,102807398,102816837,102817742,102819412,102821699,102822150,102824976,102827079,102832951,102835205,102837295,102838578,102839662,102841626,102843072,102843508,102856596,102858079,102859427,102860503,102864806,102867640,102870671,102872513,102874494,102875342,102877580,	102784980,102804382,102807440,102816876,102817778,102819523,102821848,102822268,102825028,102827136,102833118,102835338,102837420,102838684,102839829,102841789,102843179,102843642,102856756,102858184,102859616,102860638,102864974,102867729,102870867,102872653,102874654,102875479,102877873,	potentially_novel_isoform
mmu_circ_021355	chr11_102839662_102877767_F	circRNA	Yes	chr11	102839662	102877767	+	2237	38105	15	0,1964,3410,3846,16934,18417,19765,20841,25144,27978,31009,32851,34832,35680,37918	167,163,107,134,160,105,189,135,168,89,196,140,160,137,187	ENSMMUT00000029358	chr11:102838684-102839662|chr11:102877767-102881999	2	0	chr11	+	102784869	102883477	ENSMMUT00000029358	29	102784869,102804346,102807398,102819412,102821699,102822150,102824976,102827079,102832951,102835205,102837295,102838578,102839662,102841626,102843072,102843508,102856596,102858079,102859427,102860503,102864806,102867640,102870671,102872513,102874494,102875342,102877580,102881999,102883198,	102784980,102804382,102807440,102819523,102821848,102822268,102825028,102827136,102833118,102835338,102837420,102838684,102839829,102841789,102843179,102843642,102856756,102858184,102859616,102860638,102864974,102867729,102870867,102872653,102874654,102875479,102877767,102882042,102883477,	complete_match	ENSMMUG00000020875	102784870	102883477	102784857	102883486	+	MYBPC1-204	MYBPC1	protein_coding	protein_coding	ENSMMUP00000027471			myosin binding protein C, slow type [Source:HGNC Symbol;Acc:HGNC:7549]
mmu_circ_021359	chr11_102864806_102882042_F	circRNA	Yes	chr11	102864806	102882042	+	1120	17236	8	0,2834,5865,7707,9688,10536,12774,17193	168,89,196,140,160,137,187,43	ENSMMUT00000029358	chr11:102860638-102864806|chr11:102882042-102883198	2	0	chr11	+	102784869	102883477	ENSMMUT00000029358	29	102784869,102804346,102807398,102819412,102821699,102822150,102824976,102827079,102832951,102835205,102837295,102838578,102839662,102841626,102843072,102843508,102856596,102858079,102859427,102860503,102864806,102867640,102870671,102872513,102874494,102875342,102877580,102881999,102883198,	102784980,102804382,102807440,102819523,102821848,102822268,102825028,102827136,102833118,102835338,102837420,102838684,102839829,102841789,102843179,102843642,102856756,102858184,102859616,102860638,102864974,102867729,102870867,102872653,102874654,102875479,102877767,102882042,102883477,	complete_match	ENSMMUG00000020875	102784870	102883477	102784857	102883486	+	MYBPC1-204	MYBPC1	protein_coding	protein_coding	ENSMMUP00000027471			myosin binding protein C, slow type [Source:HGNC Symbol;Acc:HGNC:7549]
mmu_circ_021360	chr11_102874494_102877767_F	circRNA	Yes	chr11	102874494	102877767	+	484	3273	3	0,848,3086	160,137,187	ENSMMUT00000029358	chr11:102872653-102874494|chr11:102877767-102881999	2	0	chr11	+	102784869	102883477	ENSMMUT00000029358	29	102784869,102804346,102807398,102819412,102821699,102822150,102824976,102827079,102832951,102835205,102837295,102838578,102839662,102841626,102843072,102843508,102856596,102858079,102859427,102860503,102864806,102867640,102870671,102872513,102874494,102875342,102877580,102881999,102883198,	102784980,102804382,102807440,102819523,102821848,102822268,102825028,102827136,102833118,102835338,102837420,102838684,102839829,102841789,102843179,102843642,102856756,102858184,102859616,102860638,102864974,102867729,102870867,102872653,102874654,102875479,102877767,102882042,102883477,	complete_match	ENSMMUG00000020875	102784870	102883477	102784857	102883486	+	MYBPC1-204	MYBPC1	protein_coding	protein_coding	ENSMMUP00000027471			myosin binding protein C, slow type [Source:HGNC Symbol;Acc:HGNC:7549]
mmu_circ_021363	chr11_102975626_102985659_R	circRNA	Yes	chr11	102975626	102985659	-	568	10033	5	0,404,5884,8432,9913	135,65,206,42,120	ENSMMUT00000017610	chr11:102966474-102975626|chr11:102985659-102992262	2	0	chr11	-	102941187	103025924	ENSMMUT00000017610	21	102941187,102943716,102949081,102952944,102953304,102955386,102956414,102956851,102959417,102961310,102963313,102965337,102965722,102966312,102975626,102976030,102981510,102984058,102985539,102992262,103025789,	102941265,102943807,102949249,102953043,102953390,102955500,102956634,102957051,102960520,102961514,102963437,102965508,102965902,102966474,102975761,102976095,102981716,102984100,102985659,102992348,103025924,	complete_match	ENSMMUG00000012562	102941188	103025924	102941188	103025924	-	GNPTAB-201	GNPTAB	protein_coding	protein_coding	ENSMMUP00000016491	XM_001092998	XP_001092998	N-acetylglucosamine-1-phosphate transferase, alpha and beta subunits [Source:HGNC Symbol;Acc:HGNC:29670]
mmu_circ_021364	chr11_1037598_1120724_F	circRNA	Yes	chr11	1037598	1120724	+	1634	83126	6	0,51102,69468,72443,79326,82958	821,417,90,69,69,168	PREDICTED.68128.1	chr11:996496-1037598|chr11:1120724-1141772	1	1	chr11	+	996452	1439002	PREDICTED.68128.1	18	996452,1037598,1088700,1107066,1110041,1116924,1120556,1141772,1182342,1183732,1185100,1191622,1240835,1266012,1305142,1399452,1436471,1438748,	996496,1038419,1089117,1107156,1110110,1116993,1120724,1141940,1182480,1183873,1185241,1191816,1240971,1266144,1305303,1399597,1436570,1439002,	potentially_novel_isoform
mmu_circ_021368	chr11_106267276_106272115_F	circRNA	Yes	chr11	106267276	106272115	+	253	4839	2	0,4713	127,126	PREDICTED.89137.2	chr11:106261129-106267276|chr11:106272115-106274374	2	0	chr11	+	106240531	106281556	PREDICTED.89137.2	27	106240531,106243917,106247138,106247284,106248502,106248945,106251748,106253679,106254219,106255057,106255978,106258644,106259054,106259846,106260076,106260968,106267276,106271989,106274374,106274970,106275237,106276515,106277193,106278354,106278772,106280475,106281072,	106240661,106244057,106247192,106247350,106248548,106249013,106251831,106253722,106254323,106255106,106256001,106258681,106259063,106259970,106260204,106261129,106267403,106272115,106274482,106275117,106275317,106276621,106277310,106278523,106278930,106280550,106281556,	potentially_novel_isoform
mmu_circ_021371	chr11_107172121_107195006_R	circRNA	Yes	chr11	107172121	107195006	-	339	22885	3	0,2954,22764	66,152,121	PREDICTED.89549.3	chr11:107160987-107172121|chr11:107195006-107226925	2	0	chr11	-	107150272	107231551	PREDICTED.89549.3	8	107150272,107151431,107158575,107160867,107172121,107175075,107194885,107226925,	107151396,107155722,107158708,107160987,107172187,107175227,107195006,107231551,	complete_match
mmu_circ_021372	chr11_107886846_107931080_F	circRNA	Yes	chr11	107886846	107931080	+	1316	44234	6	0,10628,27677,28917,36507,44089	606,95,229,96,145,145	PREDICTED.25959.3	chr11:107854085-107886846|chr11:107931080-107941785	0	2	chr11	+	107847291	107946429	PREDICTED.25959.3	10	107847291,107854037,107886846,107897474,107914523,107915763,107923353,107930935,107941785,107945375,	107847479,107854085,107887452,107897569,107914752,107915859,107923498,107931080,107941905,107946429,	complete_match
mmu_circ_021377	chr11_108806655_108810142_R	circRNA	Yes	chr11	108806655	108810142	-	355	3487	3	0,1606,3337	86,119,150	ENSMMUT00000021807	chr11:108805819-108806655|chr11:108810142-108814812	1	1	chr11	-	108788445	108824019	ENSMMUT00000021807	11	108788445,108794879,108804407,108805691,108806655,108808261,108809992,108814812,108817134,108820061,108823749,	108790104,108795048,108804722,108805819,108806741,108808380,108810142,108815607,108817320,108820195,108824019,	complete_match	ENSMMUG00000015550	108788446	108824019	108788446	108824019	-	PRDM4-201	PRDM4	protein_coding	protein_coding	ENSMMUP00000020397	XM_001101382	XP_001101382	PR domain zinc finger protein 4 [Source:UniProtKB/TrEMBL;Acc:F6RFV6]
mmu_circ_021383	chr11_110187941_110190392_F	circRNA	Yes	chr11	110187941	110190392	+	320	2451	3	0,2117,2340	99,110,111	PREDICTED.90178.3	chr11:110186186-110187941|chr11:110190392-110193548	0	2	chr11	+	110129153	110207841	PREDICTED.90178.3	12	110129153,110148435,110177698,110181649,110185639,110186104,110187941,110190058,110190281,110193548,110194379,110206360,	110129674,110149097,110177831,110181788,110185749,110186186,110188040,110190168,110190392,110193758,110194550,110207841,	potentially_novel_isoform
mmu_circ_021387	chr11_110249809_110259959_F	circRNA	Yes	chr11	110249809	110259959	+	2329	10150	8	0,1004,1194,2566,2863,4747,7407,8638	138,100,108,57,42,216,156,1512	PREDICTED.90366.1	chr11:110244581-110249809|chr11:110259959-110265527	1	2	chr11	+	110238962	110269192	PREDICTED.90366.1	14	110238962,110241683,110242718,110244462,110249809,110250813,110251003,110252375,110252672,110254556,110257216,110258447,110265527,110266075,	110241506,110241797,110242808,110244581,110249947,110250913,110251111,110252432,110252714,110254772,110257372,110259959,110265650,110269192,	potentially_novel_isoform
mmu_circ_021388	chr11_110518353_110523429_F	circRNA	Yes	chr11	110518353	110523429	+	408	5076	3	0,4672,4965	120,177,111	PREDICTED.90128.3	chr11:110512609-110518353|chr11:110523429-110526194	1	1	chr11	+	110479375	110527377	PREDICTED.90128.3	23	110479375,110483312,110485206,110485535,110487667,110488122,110490172,110491512,110492579,110492685,110492754,110500920,110502728,110504378,110508872,110510900,110511648,110512509,110518353,110523025,110523318,110526194,110526651,	110479813,110483418,110485388,110485656,110487727,110488227,110490269,110491598,110492662,110492741,110492844,110501171,110502892,110504546,110509044,110511019,110511763,110512609,110518473,110523202,110523429,110526332,110527377,	potentially_novel_isoform
mmu_circ_021389	chr11_110865570_110875143_R	circRNA	Yes	chr11	110865570	110875143	-	405	9573	3	0,1929,9461	150,143,112	PREDICTED.26379.4	chr11:110861395-110865570|chr11:110875143-110876443	3	0	chr11	-	110845635	110912351	PREDICTED.26379.4	20	110845635,110847513,110851943,110852705,110859134,110861146,110865570,110867499,110875031,110876443,110876778,110880611,110882475,110895983,110899257,110899491,110904951,110905678,110907608,110912188,	110846992,110847577,110852132,110852788,110859224,110861395,110865720,110867642,110875143,110876541,110876851,110880663,110882521,110896078,110899388,110899578,110905057,110905791,110907742,110912351,	complete_match
mmu_circ_021390	chr11_110875031_110876851_R	circRNA	Yes	chr11	110875031	110876851	-	283	1820	3	0,1412,1747	112,98,73	PREDICTED.26379.4	chr11:110867642-110875031|chr11:110876851-110880611	3	0	chr11	-	110845635	110912351	PREDICTED.26379.4	20	110845635,110847513,110851943,110852705,110859134,110861146,110865570,110867499,110875031,110876443,110876778,110880611,110882475,110895983,110899257,110899491,110904951,110905678,110907608,110912188,	110846992,110847577,110852132,110852788,110859224,110861395,110865720,110867642,110875143,110876541,110876851,110880663,110882521,110896078,110899388,110899578,110905057,110905791,110907742,110912351,	complete_match
mmu_circ_021393	chr11_110936043_110946518_F	circRNA	Yes	chr11	110936043	110946518	+	676	10475	6	0,787,5980,7680,9553,10344	144,190,67,82,62,131	ENSMMUT00000010755	chr11:110934145-110936043|chr11:110946518-110947358	0	2	chr11	+	110915742	110956050	ENSMMUT00000010755	14	110915742,110928660,110930225,110934099,110936043,110936830,110942023,110943723,110945596,110946387,110947358,110948551,110951646,110955786,	110916101,110928793,110930350,110934145,110936187,110937020,110942090,110943805,110945658,110946518,110947516,110948665,110951807,110956050,	complete_match	ENSMMUG00000007678	110915743	110956050	110915743	110956050	+	ANKRD13A-201	ANKRD13A	protein_coding	protein_coding	ENSMMUP00000010091	XM_001106177	XP_001106177	ankyrin repeat domain 13A [Source:HGNC Symbol;Acc:HGNC:21268]
mmu_circ_021396	chr11_111088810_111101193_F	circRNA	Yes	chr11	111088810	111101193	+	369	12383	3	0,10614,12293	150,129,90	PREDICTED.90219.3	chr11:111071136-111088810|chr11:111101193-111112292	2	0	chr11	+	111035099	111112851	PREDICTED.90219.3	15	111035099,111037797,111038483,111039372,111043178,111045615,111045994,111047442,111054333,111058215,111070989,111088810,111099424,111101103,111112292,	111035565,111037962,111038587,111039553,111043268,111045681,111046105,111047527,111054497,111058311,111071136,111088960,111099553,111101193,111112851,	potentially_novel_isoform
mmu_circ_021404	chr11_111846145_111846373_R	circRNA	Yes	chr11	111846145	111846373	-	128	228	2	0,149	49,79	ENSMMUT00000003330	chr11:111844232-111846145|chr11:111846373-111847210	4	0	chr11	-	111843877	111853711	ENSMMUT00000003330	7	111843877,111846145,111846294,111847210,111848845,111852229,111853658,	111844232,111846194,111846373,111847315,111848921,111852319,111853711,	complete_match	ENSMMUG00000002347	111843878	111853711	111843878	111853711	-	MYL2-201	MYL2	protein_coding	protein_coding	ENSMMUP00000003144	XM_001100796	XP_001100796	Uncharacterized protein [Source:UniProtKB/TrEMBL;Acc:F7C5K1]
mmu_circ_021407	chr11_112454069_112498215_R	circRNA	Yes	chr11	112454069	112498215	-	1307	44146	10	0,2824,4891,6507,7520,12455,40510,41142,42375,44109	183,210,179,198,92,125,151,72,60,37	PREDICTED.90713.2	chr11:112451323-112454069|chr11:112498215-112542223	3	0	chr11	-	112393308	112542296	PREDICTED.90713.2	23	112393308,112397753,112405605,112411392,112411841,112431728,112432171,112433204,112435231,112450286,112450627,112451125,112454069,112456893,112458960,112460576,112461589,112466524,112494579,112495211,112496444,112498178,112542223,	112397117,112397899,112405659,112411525,112412026,112431789,112432324,112433268,112435536,112450357,112450735,112451323,112454252,112457103,112459139,112460774,112461681,112466649,112494730,112495283,112496504,112498215,112542296,	potentially_novel_isoform
mmu_circ_021409	chr11_112466524_112495283_R	circRNA	Yes	chr11	112466524	112495283	-	348	28759	3	0,28055,28687	125,151,72	PREDICTED.90713.2	chr11:112461681-112466524|chr11:112495283-112496444	4	0	chr11	-	112393308	112542296	PREDICTED.90713.2	23	112393308,112397753,112405605,112411392,112411841,112431728,112432171,112433204,112435231,112450286,112450627,112451125,112454069,112456893,112458960,112460576,112461589,112466524,112494579,112495211,112496444,112498178,112542223,	112397117,112397899,112405659,112411525,112412026,112431789,112432324,112433268,112435536,112450357,112450735,112451323,112454252,112457103,112459139,112460774,112461681,112466649,112494730,112495283,112496504,112498215,112542296,	potentially_novel_isoform
mmu_circ_021412	chr11_112618728_112620427_R	circRNA	Yes	chr11	112618728	112620427	-	361	1699	2	0,1537	199,162	PREDICTED.26342.1	chr11:112616266-112618728|chr11:112620427-112622832	0	2	chr11	-	112579036	112623613	PREDICTED.26342.1	12	112579036,112586357,112592694,112596500,112596972,112598357,112604083,112609241,112616076,112618728,112620265,112622832,	112581103,112586461,112592784,112596610,112597111,112598433,112604232,112609355,112616266,112618927,112620427,112623613,	complete_match
mmu_circ_021416	chr11_112979771_113004721_R	circRNA	Yes	chr11	112979771	113004721	-	1091	24950	10	0,3223,6649,7661,10014,10460,12529,19461,22482,24864	113,170,90,112,79,108,75,119,139,86	PREDICTED.90657.1	chr11:112972123-112979771|chr11:113004721-113021153	0	2	chr11	-	112936163	113021275	PREDICTED.90657.1	24	112936163,112938342,112948353,112949605,112951221,112952265,112952798,112958422,112959064,112964330,112965165,112971010,112971915,112979771,112982994,112986420,112987432,112989785,112990231,112992300,112999232,113002253,113004635,113021153,	112938252,112938462,112948473,112949703,112951287,112952389,112953042,112958548,112959216,112964430,112965346,112971100,112972123,112979884,112983164,112986510,112987544,112989864,112990339,112992375,112999351,113002392,113004721,113021275,	complete_match
mmu_circ_021424	chr11_1141772_1240971_F	circRNA	Yes	chr11	1141772	1240971	+	930	99199	7	0,40570,41960,43328,49850,50194,99063	168,138,141,141,194,12,136	PREDICTED.19719.1	chr11:1120724-1141772|chr11:1240971-1266012	0	2	chr11	+	996768	1438775	PREDICTED.19719.1	19	996768,1037598,1088700,1107066,1110041,1116924,1120556,1141772,1182342,1183732,1185100,1191622,1191966,1240835,1266012,1305142,1399452,1436471,1438748,	996818,1038419,1089117,1107156,1110110,1116993,1120724,1141940,1182480,1183873,1185241,1191816,1191978,1240971,1266144,1305303,1399597,1436570,1438775,	potentially_novel_isoform
mmu_circ_021429	chr11_117873375_117895023_F	circRNA	Yes	chr11	117873375	117895023	+	359	21648	3	0,17293,21559	105,165,89	PREDICTED.26594.1	chr11:117862105-117873375|chr11:117895023-117909961	2	0	chr11	+	117861758	117974216	PREDICTED.26594.1	11	117861758,117873375,117890668,117894934,117909961,117930945,117934138,117955345,117968757,117971939,117972569,	117862105,117873480,117890833,117895023,117910119,117931142,117934345,117955473,117968931,117972050,117974216,	complete_match
mmu_circ_021431	chr11_118112627_118119733_R	circRNA	Yes	chr11	118112627	118119733	-	450	7106	3	0,1421,6969	133,180,137	PREDICTED.26629.1	chr11:118104500-118112627|chr11:118119733-118121326	0	3	chr11	-	118087799	118138801	PREDICTED.26629.1	12	118087799,118102227,118104309,118112627,118114048,118119596,118121326,118121776,118124649,118134429,118137562,118138546,	118091765,118102385,118104500,118112760,118114228,118119733,118121463,118121923,118124771,118134524,118137698,118138801,	potentially_novel_isoform
mmu_circ_021435	chr11_1182342_1240971_F	circRNA	Yes	chr11	1182342	1240971	+	750	58629	5	0,1390,2758,9280,58493	138,141,141,194,136	PREDICTED.68128.1	chr11:1141940-1182342|chr11:1240971-1266012	2	0	chr11	+	996452	1439002	PREDICTED.68128.1	18	996452,1037598,1088700,1107066,1110041,1116924,1120556,1141772,1182342,1183732,1185100,1191622,1240835,1266012,1305142,1399452,1436471,1438748,	996496,1038419,1089117,1107156,1110110,1116993,1120724,1141940,1182480,1183873,1185241,1191816,1240971,1266144,1305303,1399597,1436570,1439002,	potentially_novel_isoform
mmu_circ_021446	chr11_122905355_122905850_F	circRNA	Yes	chr11	122905355	122905850	+	495	495	1	0	495	PREDICTED.92692.1	chr11:122904191-122905355|chr11:122905850-122908586	2	0	chr11	+	122904042	122914313	PREDICTED.92692.1	6	122904042,122905355,122908586,122911249,122913322,122913735,	122904191,122905850,122909861,122911398,122913657,122914313,	potentially_novel_isoform
mmu_circ_021447	chr11_123019934_123038207_F	circRNA	Yes	chr11	123019934	123038207	+	522	18273	5	0,2489,10741,11097,18195	141,110,112,81,78	PREDICTED.92736.2	chr11:123011246-123019934|chr11:123038207-123040664	2	1	chr11	+	123008818	123050945	PREDICTED.92736.2	14	123008818,123009041,123010877,123019934,123022423,123030675,123031031,123038129,123040664,123043000,123045984,123047467,123049095,123050531,	123008999,123009238,123011246,123020075,123022533,123030787,123031112,123038207,123040715,123043215,123047118,123047619,123049269,123050945,	potentially_novel_isoform
mmu_circ_021456	chr11_123577205_123598944_R	circRNA	Yes	chr11	123577205	123598944	-	1285	21739	5	0,1988,6355,17919,21635	58,117,945,61,104	PREDICTED.27867.3	chr11:123576670-123577205|chr11:123598944-123599497	0	2	chr11	-	123517844	123638102	PREDICTED.27867.3	24	123517844,123520407,123524526,123525165,123525401,123535570,123552822,123559401,123561894,123570746,123571060,123575216,123576586,123577205,123579193,123583560,123595124,123598840,123599497,123603027,123605597,123618922,123622499,123638079,	123519462,123520532,123524576,123525316,123525519,123535623,123552943,123559508,123562011,123570962,123571226,123575373,123576670,123577263,123579310,123584505,123595185,123598944,123599695,123603250,123605722,123619494,123622690,123638102,	potentially_novel_isoform
mmu_circ_021458	chr11_123762461_123763257_R	ciRNA	Yes	chr11	123762461	123763257	-	796	796	1	0	796	PREDICTED.27080.1	chr11:123760905-123763257	0	2	chr11	-	123747883	123769086	PREDICTED.27080.1	10	123747883,123750357,123753165,123757000,123759112,123759455,123760714,123763257,123764318,123768941,	123748134,123750587,123753245,123757123,123759304,123759467,123760905,123763301,123764475,123769086,	potentially_novel_isoform
mmu_circ_021462	chr11_1240835_1266144_F	circRNA	Yes	chr11	1240835	1266144	+	268	25309	2	0,25177	136,132	PREDICTED.68128.1	chr11:1191816-1240835|chr11:1266144-1305142	2	0	chr11	+	996452	1439002	PREDICTED.68128.1	18	996452,1037598,1088700,1107066,1110041,1116924,1120556,1141772,1182342,1183732,1185100,1191622,1240835,1266012,1305142,1399452,1436471,1438748,	996496,1038419,1089117,1107156,1110110,1116993,1120724,1141940,1182480,1183873,1185241,1191816,1240971,1266144,1305303,1399597,1436570,1439002,	potentially_novel_isoform
mmu_circ_021465	chr11_124468851_124477942_R	circRNA	Yes	chr11	124468851	124477942	-	1047	9091	5	0,3677,7877,8338,8965	216,88,156,461,126	PREDICTED.93055.1	chr11:124452767-124468851|chr11:124477942-124483395	2	0	chr11	-	124422872	124507228	PREDICTED.93055.1	23	124422872,124432336,124432688,124433657,124434557,124435509,124436830,124438186,124447560,124451130,124452719,124468851,124472528,124476728,124477189,124477816,124483395,124488823,124493712,124497684,124499302,124503365,124507132,	124423013,124432405,124432936,124433761,124434678,124435650,124437006,124438321,124447662,124451195,124452767,124469067,124472616,124476884,124477650,124477942,124483502,124488914,124493836,124498199,124499392,124503519,124507228,	potentially_novel_isoform
mmu_circ_021472	chr11_124606372_124622686_R	circRNA	Yes	chr11	124606372	124622686	-	774	16314	5	0,2645,8633,13281,16209	161,97,101,310,105	PREDICTED.27223.2	chr11:124603434-124606372|chr11:124622686-124626124	2	0	chr11	-	124561611	124642917	PREDICTED.27223.2	34	124561611,124571852,124572049,124572184,124572702,124574459,124579089,124579275,124579494,124580537,124584080,124585848,124586022,124587863,124590560,124591092,124591359,124592181,124594624,124596394,124597045,124598933,124599214,124599399,124600234,124601908,124603300,124606372,124609017,124615005,124619653,124622581,124626124,124642772,	124566252,124571900,124572159,124572222,124572783,124574597,124579182,124579370,124579641,124580612,124584180,124585920,124586135,124587999,124590692,124591268,124591527,124592379,124594776,124596492,124597228,124599087,124599320,124599535,124600396,124601999,124603434,124606533,124609114,124615106,124619963,124622686,124626256,124642917,	potentially_novel_isoform
mmu_circ_021475	chr11_124869510_124869703_F	circRNA	Yes	chr11	124869510	124869703	+	193	193	1	0	193	PREDICTED.27183.1	chr11:124867501-124869510|chr11:124869703-124870376	1	2	chr11	+	124867220	124880707	PREDICTED.27183.1	5	124867220,124869510,124870376,124873003,124879522,	124867501,124869703,124870397,124873111,124880707,	potentially_novel_isoform
mmu_circ_021480	chr11_12532575_12540286_R	circRNA	Yes	chr11	12532575	12540286	-	899	7711	4	0,1256,4237,7514	172,397,133,197	PREDICTED.20194.1	chr11:12520068-12532575|chr11:12540286-12556399	2	0	chr11	-	12470325	12623749	PREDICTED.20194.1	23	12470325,12478627,12479359,12480760,12485976,12487021,12490369,12493419,12502186,12503638,12505521,12513425,12514383,12516797,12519085,12519851,12532575,12533831,12536812,12540089,12556399,12601545,12623399,	12475957,12478725,12479496,12480991,12486087,12487258,12490495,12493629,12502377,12503850,12505724,12513752,12514568,12517024,12519375,12520068,12532747,12534228,12536945,12540286,12556597,12601939,12623749,	complete_match
mmu_circ_021482	chr11_125643203_125643382_R	ciRNA	Yes	chr11	125643203	125643382	-	179	179	1	0	179	ENSMMUT00000045391	chr11:125643180-125643382	2	0	chr11	-	125632567	125797508	ENSMMUT00000045391	54	125632567,125634282,125635518,125638939,125640445,125641259,125642361,125643034,125643382,125645309,125647766,125648066,125648372,125649604,125650428,125651993,125653965,125655234,125655579,125658258,125661790,125662172,125662534,125663138,125664384,125669384,125670939,125679479,125681418,125685195,125692674,125693782,125703032,125704275,125705259,125707965,125709845,125710755,125717577,125726320…	125633731,125634462,125635743,125638993,125640594,125641409,125642555,125643180,125643532,125645737,125647974,125648216,125648522,125649856,125650646,125652352,125654252,125655321,125655720,125658409,125661894,125662277,125662637,125663278,125664546,125669556,125671060,125680068,125681469,125685343,125692713,125693792,125703082,125704325,125705322,125708138,125709979,125710774,125717582,125726419…	complete_match	ENSMMUG00000023107	125632568	125797508	125632568	125797508	-	NCOR2-201	NCOR2	protein_coding	protein_coding	ENSMMUP00000038418			nuclear receptor corepressor 2 [Source:HGNC Symbol;Acc:HGNC:7673]
mmu_circ_021483	chr11_125707965_125708138_R	circRNA	Yes	chr11	125707965	125708138	-	173	173	1	0	173	PREDICTED.27332.1	chr11:125705322-125707965|chr11:125708138-125709845	0	2	chr11	-	125632306	125837891	PREDICTED.27332.1	53	125632306,125634282,125635656,125638939,125640445,125641259,125642361,125643034,125643382,125645309,125647766,125648066,125648372,125649604,125650428,125651993,125653965,125655234,125655579,125658258,125661790,125662172,125662534,125663138,125664384,125669384,125670939,125679479,125681418,125685195,125692674,125693782,125703032,125704275,125705259,125707965,125709845,125726320,125728880,125732539…	125633731,125634462,125635743,125638993,125640594,125641409,125642555,125643180,125643532,125645737,125647974,125648216,125648522,125649856,125650646,125652352,125654252,125655321,125655720,125658409,125661894,125662277,125662637,125663278,125664546,125669556,125671060,125680068,125681469,125685343,125692713,125693792,125703082,125704325,125705322,125708138,125709979,125726419,125728935,125732718…	potentially_novel_isoform
mmu_circ_021484	chr11_125732539_125744007_R	circRNA	Yes	chr11	125732539	125744007	-	513	11468	4	0,3127,4092,11401	179,94,173,67	PREDICTED.27332.1	chr11:125728935-125732539|chr11:125744007-125756237	0	2	chr11	-	125632306	125837891	PREDICTED.27332.1	53	125632306,125634282,125635656,125638939,125640445,125641259,125642361,125643034,125643382,125645309,125647766,125648066,125648372,125649604,125650428,125651993,125653965,125655234,125655579,125658258,125661790,125662172,125662534,125663138,125664384,125669384,125670939,125679479,125681418,125685195,125692674,125693782,125703032,125704275,125705259,125707965,125709845,125726320,125728880,125732539…	125633731,125634462,125635743,125638993,125640594,125641409,125642555,125643180,125643532,125645737,125647974,125648216,125648522,125649856,125650646,125652352,125654252,125655321,125655720,125658409,125661894,125662277,125662637,125663278,125664546,125669556,125671060,125680068,125681469,125685343,125692713,125693792,125703082,125704325,125705322,125708138,125709979,125726419,125728935,125732718…	potentially_novel_isoform
mmu_circ_021496	chr11_133427361_133434046_F	circRNA	Yes	chr11	133427361	133434046	+	964	6685	4	0,569,872,6573	174,246,432,112	PREDICTED.95282.1	chr11:133408752-133427361|chr11:133434046-133435078	5	0	chr11	+	133408685	133435200	PREDICTED.95282.1	6	133408685,133427361,133427930,133428233,133433934,133435078,	133408752,133427535,133428176,133428665,133434046,133435200,	potentially_novel_isoform
mmu_circ_021498	chr11_133839559_133842088_F	circRNA	Yes	chr11	133839559	133842088	+	126	2529	2	0,2493	90,36	PREDICTED.94597.2	chr11:133821119-133839559|chr11:133842088-133860275	2	4	chr11	+	133803409	133860520	PREDICTED.94597.2	5	133803409,133820921,133839559,133842052,133860275,	133803517,133821119,133839649,133842088,133860520,	ref_exonic_overlap
mmu_circ_021499	chr11_134082852_134086526_R	circRNA	Yes	chr11	134082852	134086526	-	459	3674	3	0,1415,3530	117,198,144	PREDICTED.94791.2	chr11:134079966-134082852|chr11:134086526-134088477	0	2	chr11	-	134070684	134127802	PREDICTED.94791.2	24	134070684,134076113,134077435,134078453,134079162,134079826,134082852,134084267,134086382,134088477,134090967,134093112,134095239,134097609,134098295,134100035,134103722,134107333,134109364,134110167,134113209,134116128,134120388,134127773,	134074976,134076277,134077600,134078576,134079295,134079966,134082969,134084465,134086526,134088694,134091062,134093376,134095317,134097978,134098457,134100173,134103925,134107640,134109476,134110826,134113322,134116401,134120723,134127802,	potentially_novel_isoform
mmu_circ_021502	chr11_134310579_134318646_F	circRNA	Yes	chr11	134310579	134318646	+	428	8067	3	0,7167,7971	205,127,96	ENSMMUT00000045305	chr11:134306934-134310579|chr11:134318646-134324960	7	0	chr11	+	134306554	134327592	ENSMMUT00000045305	5	134306554,134310579,134317746,134318550,134324960,	134306934,134310784,134317873,134318646,134327592,	complete_match	ENSMMUG00000013867	134306555	134327592	134306485	134327592	+			protein_coding	protein_coding	ENSMMUP00000038330	XM_001085437	XP_001085437
mmu_circ_021504	chr11_14804112_14827659_F	circRNA	Yes	chr11	14804112	14827659	+	1999	23547	5	0,11166,12953,14660,23481	1562,87,146,138,66	PREDICTED.71231.1	chr11:14747692-14804112|chr11:14827659-14837155	1	3	chr11	+	14747319	14875819	PREDICTED.71231.1	14	14747319,14804112,14815278,14817065,14818772,14827593,14837155,14837798,14841090,14847084,14855085,14857475,14860142,14875675,	14747692,14805674,14815365,14817211,14818910,14827659,14837229,14837887,14841729,14847149,14855164,14857631,14860325,14875819,	potentially_novel_isoform
mmu_circ_021512	chr11_16064402_16078217_R	circRNA	Yes	chr11	16064402	16078217	-	537	13815	5	0,277,1388,12114,13735	150,162,68,77,80	PREDICTED.71527.4	chr11:16061506-16064402|chr11:16078217-16182603	2	0	chr11	-	16017926	16182831	PREDICTED.71527.4	19	16017926,16025422,16034673,16035682,16040789,16044489,16047796,16051739,16052159,16054299,16055708,16060737,16061423,16064402,16064679,16065790,16076516,16078137,16182603,	16018328,16025645,16034817,16035791,16040923,16044673,16047945,16051814,16052248,16054426,16055782,16060874,16061506,16064552,16064841,16065858,16076593,16078217,16182831,	potentially_novel_isoform
mmu_circ_021513	chr11_16295607_16296163_F	ciRNA	Yes	chr11	16295607	16296163	+	556	556	1	0	556	PREDICTED.71183.1	chr11:16295607-16296188	2	0	chr11	+	16287562	16300976	PREDICTED.71183.1	6	16287562,16288912,16295525,16296188,16299372,16300678,	16288192,16289048,16295607,16296261,16299469,16300976,	potentially_novel_isoform
mmu_circ_021514	chr11_19724484_19731173_F	circRNA	Yes	chr11	19724484	19731173	+	214	6689	2	0,6577	102,112	ENSMMUT00000047104	chr11:19710273-19724484|chr11:19731173-19733866	3	0	chr11	+	19513301	19736559	ENSMMUT00000047104	20	19513301,19513604,19515934,19640250,19641367,19643619,19647141,19653388,19657448,19662106,19670765,19674961,19708610,19709915,19710123,19724484,19731061,19733866,19735021,19736430,	19513441,19513684,19515992,19640334,19641488,19643724,19647214,19653489,19657564,19662574,19671231,19675045,19708673,19709996,19710273,19724586,19731173,19733913,19735210,19736559,	complete_match	ENSMMUG00000016550	19513302	19736559	19513302	19736559	+	PLEKHA5-201	PLEKHA5	protein_coding	protein_coding	ENSMMUP00000040130			pleckstrin homology domain containing, family A member 5 [Source:HGNC Symbol;Acc:HGNC:30036]
mmu_circ_021516	chr11_19878064_19878251_F	circRNA	Yes	chr11	19878064	19878251	+	187	187	1	0	187	ENSMMUT00000015817	chr11:19855318-19878064|chr11:19878251-19884691	0	2	chr11	+	19844012	19896879	ENSMMUT00000015817	5	19844012,19855210,19878064,19884691,19896807,	19844222,19855318,19878251,19884816,19896879,	complete_match	ENSMMUG00000016243	19844013	19896879	19820376	19896879	+	AEBP2-202	AEBP2	protein_coding	protein_coding	ENSMMUP00000014819			AE binding protein 2 [Source:HGNC Symbol;Acc:HGNC:24051]
mmu_circ_021518	chr11_21068839_21085896_F	circRNA	Yes	chr11	21068839	21085896	+	1183	17057	7	0,2736,10597,10852,12684,14434,16798	138,112,114,200,204,156,259	ENSMMUT00000011556	chr11:21066787-21068839|chr11:21085896-21104498	2	0	chr11	+	20791040	21104740	ENSMMUT00000011556	17	20791040,20973864,21045087,21047865,21048098,21053283,21061611,21065419,21066632,21068839,21071575,21079436,21079691,21081523,21083273,21085637,21104498,	20792000,20973915,21045345,21048040,21048149,21053319,21061831,21065505,21066787,21068977,21071687,21079550,21079891,21081727,21083429,21085896,21104740,	complete_match	ENSMMUG00000008269	20791041	21104740	20791041	21104740	+	PDE3A-201	PDE3A	protein_coding	protein_coding	ENSMMUP00000010834		XP_001096963	phosphodiesterase 3A, cGMP-inhibited [Source:HGNC Symbol;Acc:HGNC:8778]
mmu_circ_021520	chr11_21561586_21568999_F	circRNA	Yes	chr11	21561586	21568999	+	770	7413	4	0,2715,4696,7247	243,165,196,166	PREDICTED.72343.2	chr11:21544155-21561586|chr11:21568999-21574292	2	0	chr11	+	21214247	21596708	PREDICTED.72343.2	18	21214247,21219217,21496387,21501366,21505515,21537857,21539884,21542088,21543710,21544056,21561586,21564301,21566282,21568833,21574292,21576687,21579397,21595288,	21214310,21219366,21496527,21501480,21505664,21537999,21540017,21542210,21543857,21544155,21561829,21564466,21566478,21568999,21574477,21576752,21579515,21596708,	potentially_novel_isoform
mmu_circ_021521	chr11_21561586_21579515_F	circRNA	Yes	chr11	21561586	21579515	+	1138	17929	7	0,2715,4696,7247,12706,15101,17811	243,165,196,166,185,65,118	PREDICTED.72343.2	chr11:21544155-21561586|chr11:21579515-21595288	2	1	chr11	+	21214247	21596708	PREDICTED.72343.2	18	21214247,21219217,21496387,21501366,21505515,21537857,21539884,21542088,21543710,21544056,21561586,21564301,21566282,21568833,21574292,21576687,21579397,21595288,	21214310,21219366,21496527,21501480,21505664,21537999,21540017,21542210,21543857,21544155,21561829,21564466,21566478,21568999,21574477,21576752,21579515,21596708,	potentially_novel_isoform
mmu_circ_021523	chr11_22168934_22176548_R	circRNA	Yes	chr11	22168934	22176548	-	544	7614	5	0,2509,4978,6119,7493	104,109,79,131,121	PREDICTED.72742.1	chr11:22165335-22168934|chr11:22176548-22177388	2	1	chr11	-	22157676	22296503	PREDICTED.72742.1	40	22157676,22163846,22165201,22168934,22171443,22173912,22175053,22176427,22177388,22188393,22196990,22201184,22204783,22205067,22206406,22209082,22213414,22213690,22221362,22222760,22224777,22226314,22234507,22237583,22244744,22250183,22256682,22257929,22262540,22264497,22266904,22267575,22269652,22272578,22273840,22282656,22288748,22291444,22295681,22296167,	22159525,22163909,22165335,22169038,22171552,22173991,22175184,22176548,22177490,22188496,22197083,22201342,22204853,22205216,22206636,22209179,22213540,22213828,22221443,22222845,22224879,22226353,22234613,22237656,22244852,22250292,22256825,22257970,22262703,22264632,22267060,22267728,22269847,22272821,22274007,22282778,22288890,22291606,22295797,22296503,	potentially_novel_isoform
mmu_circ_021528	chr11_22213414_22226353_R	circRNA	Yes	chr11	22213414	22226353	-	571	12939	6	0,276,7948,9346,11363,12900	126,138,81,85,102,39	PREDICTED.72742.1	chr11:22209179-22213414|chr11:22226353-22234507	5	0	chr11	-	22157676	22296503	PREDICTED.72742.1	40	22157676,22163846,22165201,22168934,22171443,22173912,22175053,22176427,22177388,22188393,22196990,22201184,22204783,22205067,22206406,22209082,22213414,22213690,22221362,22222760,22224777,22226314,22234507,22237583,22244744,22250183,22256682,22257929,22262540,22264497,22266904,22267575,22269652,22272578,22273840,22282656,22288748,22291444,22295681,22296167,	22159525,22163909,22165335,22169038,22171552,22173991,22175184,22176548,22177490,22188496,22197083,22201342,22204853,22205216,22206636,22209179,22213540,22213828,22221443,22222845,22224879,22226353,22234613,22237656,22244852,22250292,22256825,22257970,22262703,22264632,22267060,22267728,22269847,22272821,22274007,22282778,22288890,22291606,22295797,22296503,	potentially_novel_isoform
mmu_circ_021530	chr11_22269652_22295797_R	circRNA	Yes	chr11	22269652	22295797	-	1147	26145	7	0,2926,4188,13004,19096,21792,26029	195,243,167,122,142,162,116	PREDICTED.72742.1	chr11:22267728-22269652|chr11:22295797-22296167	2	0	chr11	-	22157676	22296503	PREDICTED.72742.1	40	22157676,22163846,22165201,22168934,22171443,22173912,22175053,22176427,22177388,22188393,22196990,22201184,22204783,22205067,22206406,22209082,22213414,22213690,22221362,22222760,22224777,22226314,22234507,22237583,22244744,22250183,22256682,22257929,22262540,22264497,22266904,22267575,22269652,22272578,22273840,22282656,22288748,22291444,22295681,22296167,	22159525,22163909,22165335,22169038,22171552,22173991,22175184,22176548,22177490,22188496,22197083,22201342,22204853,22205216,22206636,22209179,22213540,22213828,22221443,22222845,22224879,22226353,22234613,22237656,22244852,22250292,22256825,22257970,22262703,22264632,22267060,22267728,22269847,22272821,22274007,22282778,22288890,22291606,22295797,22296503,	potentially_novel_isoform
mmu_circ_021531	chr11_22802482_22822274_R	circRNA	Yes	chr11	22802482	22822274	-	310	19792	3	0,13449,19706	115,109,86	PREDICTED.72465.2	chr11:22795650-22802482|chr11:22822274-22826874	2	0	chr11	-	22764368	22854277	PREDICTED.72465.2	24	22764368,22767491,22780415,22781535,22782111,22782692,22783016,22783452,22785472,22788942,22793101,22795310,22795595,22802482,22815931,22822188,22826874,22832290,22833338,22834480,22836590,22844623,22853726,22853975,	22764570,22767682,22780502,22781623,22782201,22782791,22783078,22783516,22785613,22789107,22793288,22795534,22795650,22802597,22816040,22822274,22827026,22832489,22833494,22834576,22836762,22844710,22853845,22854277,	potentially_novel_isoform
mmu_circ_021537	chr11_25104823_25108675_R	circRNA	Yes	chr11	25104823	25108675	-	227	3852	2	0,3766	141,86	PREDICTED.72967.2	chr11:25102190-25104823|chr11:25108675-25114358	2	0	chr11	-	25101856	25222098	PREDICTED.72967.2	10	25101856,25104823,25108589,25114358,25122912,25151315,25154568,25167425,25175810,25221440,	25102190,25104964,25108675,25114501,25123076,25151435,25154679,25167626,25175897,25222098,	potentially_novel_isoform
mmu_circ_021540	chr11_26696008_26920373_R	circRNA	Yes	chr11	26696008	26920373	-	4335	224365	29	0,4331,8090,17338,25875,28797,33220,65607,67216,71387,73956,76399,77381,84135,85143,141032,146989,152530,168771,170098,185489,188845,193607,194468,203951,204198,221143,222262,224307	93,196,165,176,126,193,108,123,96,111,201,257,184,188,109,109,143,191,121,129,126,252,201,123,126,90,174,166,58	ENSMMUT00000032537	chr11:26684283-26696008|chr11:26920373-26924065	0	5	chr11	-	26624041	27116676	ENSMMUT00000032537	57	26624041,26626078,26670917,26682812,26684152,26696008,26700339,26704098,26713346,26721883,26724805,26729228,26761615,26763224,26767395,26769964,26772407,26773389,26780143,26781151,26837040,26842997,26848538,26864779,26866106,26881497,26884853,26889615,26890476,26899959,26900206,26917151,26918270,26920315,26924065,26927863,26949373,26950803,26951400,26952799,26953102,26954191,26958899,26961127,269…	26625388,26626240,26671078,26682978,26684283,26696101,26700535,26704263,26713522,26722009,26724998,26729336,26761738,26763320,26767506,26770165,26772664,26773573,26780331,26781260,26837149,26843140,26848729,26864900,26866235,26881623,26885105,26889816,26890599,26900085,26900296,26917325,26918436,26920373,26924195,26928057,26949524,26950948,26951652,26952985,26953222,26954364,26959061,26961269,269…	complete_match	ENSMMUG00000023128	26624042	27116676	26624042	27116676	-	ITPR2-202	ITPR2	protein_coding	protein_coding	ENSMMUP00000030446	XM_001102937	XP_001102937	inositol 1,4,5-trisphosphate receptor, type 2 [Source:HGNC Symbol;Acc:HGNC:6181]
mmu_circ_021542	chr11_26899959_26900296_R	circRNA	Yes	chr11	26899959	26900296	-	216	337	2	0,247	126,90	ENSMMUT00000032537	chr11:26890599-26899959|chr11:26900296-26917151	2	0	chr11	-	26624041	27116676	ENSMMUT00000032537	57	26624041,26626078,26670917,26682812,26684152,26696008,26700339,26704098,26713346,26721883,26724805,26729228,26761615,26763224,26767395,26769964,26772407,26773389,26780143,26781151,26837040,26842997,26848538,26864779,26866106,26881497,26884853,26889615,26890476,26899959,26900206,26917151,26918270,26920315,26924065,26927863,26949373,26950803,26951400,26952799,26953102,26954191,26958899,26961127,269…	26625388,26626240,26671078,26682978,26684283,26696101,26700535,26704263,26713522,26722009,26724998,26729336,26761738,26763320,26767506,26770165,26772664,26773573,26780331,26781260,26837149,26843140,26848729,26864900,26866235,26881623,26885105,26889816,26890599,26900085,26900296,26917325,26918436,26920373,26924195,26928057,26949524,26950948,26951652,26952985,26953222,26954364,26959061,26961269,269…	complete_match	ENSMMUG00000023128	26624042	27116676	26624042	27116676	-	ITPR2-202	ITPR2	protein_coding	protein_coding	ENSMMUP00000030446	XM_001102937	XP_001102937	inositol 1,4,5-trisphosphate receptor, type 2 [Source:HGNC Symbol;Acc:HGNC:6181]
mmu_circ_021546	chr11_27272300_27273159_R	circRNA	Yes	chr11	27272300	27273159	-	234	859	2	0,778	153,81	PREDICTED.21265.1	chr11:27268803-27272300|chr11:27273159-27275292	2	1	chr11	-	27261794	27310476	PREDICTED.21265.1	12	27261794,27267950,27268705,27272300,27273078,27275292,27282881,27287311,27288804,27291291,27294898,27310163,	27266384,27268113,27268803,27272453,27273159,27275379,27283059,27287483,27288925,27291442,27295053,27310476,	complete_match
mmu_circ_021547	chr11_27272477_27273078_R	ciRNA	Yes	chr11	27272477	27273078	-	601	601	1	0	601	PREDICTED.21265.1	chr11:27272453-27273078	2	0	chr11	-	27261794	27310476	PREDICTED.21265.1	12	27261794,27267950,27268705,27272300,27273078,27275292,27282881,27287311,27288804,27291291,27294898,27310163,	27266384,27268113,27268803,27272453,27273159,27275379,27283059,27287483,27288925,27291442,27295053,27310476,	complete_match
mmu_circ_021548	chr11_27282881_27291442_R	circRNA	Yes	chr11	27282881	27291442	-	622	8561	4	0,4430,5923,8410	178,172,121,151	PREDICTED.21265.1	chr11:27275379-27282881|chr11:27291442-27294898	4	1	chr11	-	27261794	27310476	PREDICTED.21265.1	12	27261794,27267950,27268705,27272300,27273078,27275292,27282881,27287311,27288804,27291291,27294898,27310163,	27266384,27268113,27268803,27272453,27273159,27275379,27283059,27287483,27288925,27291442,27295053,27310476,	complete_match
mmu_circ_021550	chr11_27288804_27291442_R	circRNA	Yes	chr11	27288804	27291442	-	272	2638	2	0,2487	121,151	PREDICTED.21265.1	chr11:27287483-27288804|chr11:27291442-27294898	2	1	chr11	-	27261794	27310476	PREDICTED.21265.1	12	27261794,27267950,27268705,27272300,27273078,27275292,27282881,27287311,27288804,27291291,27294898,27310163,	27266384,27268113,27268803,27272453,27273159,27275379,27283059,27287483,27288925,27291442,27295053,27310476,	complete_match
mmu_circ_021556	chr11_28001174_28020199_F	circRNA	Yes	chr11	28001174	28020199	+	520	19025	5	0,1465,4963,9177,18915	41,168,61,140,110	ENSMMUT00000030596	chr11:27997406-28001174|chr11:28020199-28022201	2	0	chr11	+	27997294	28039778	ENSMMUT00000030596	8	27997294,28001174,28002639,28006137,28010351,28020089,28022201,28038669,	27997406,28001215,28002807,28006198,28010491,28020199,28022271,28039778,	complete_match	ENSMMUG00000021741	27997295	28039778	27997295	28039778	+	MRPS35-201	MRPS35	protein_coding	protein_coding	ENSMMUP00000028636	XM_001103832	XP_001103832	28S ribosomal protein S35, mitochondrial isoform 1; Uncharacterized protein [Source:UniProtKB/TrEMBL;Acc:F7DXV5]
mmu_circ_021557	chr11_28002639_28006198_F	circRNA	Yes	chr11	28002639	28006198	+	229	3559	2	0,3498	168,61	PREDICTED.73492.3	chr11:28001215-28002639|chr11:28006198-28010351	2	0	chr11	+	27997294	28013224	PREDICTED.73492.3	6	27997294,28001174,28002639,28006137,28010351,28013140,	27997406,28001215,28002807,28006198,28010491,28013224,	potentially_novel_isoform
mmu_circ_021566	chr11_30960495_30969384_R	circRNA	Yes	chr11	30960495	30969384	-	804	8889	7	0,3781,4943,6102,7863,8370,8812	67,126,161,166,90,117,77	ENSMMUT00000001925	chr11:30956576-30960495|chr11:30969384-30972340	0	2	chr11	-	30932589	30999894	ENSMMUT00000001925	25	30932589,30935502,30937671,30940575,30943099,30952665,30955674,30956450,30960495,30964276,30965438,30966597,30968358,30968865,30969307,30972340,30974114,30977117,30977782,30979570,30984191,30985350,30988017,30994633,30999640,	30934563,30935619,30937875,30940781,30943320,30952761,30955772,30956576,30960562,30964402,30965599,30966763,30968448,30968982,30969384,30972440,30974249,30977202,30977877,30979660,30984348,30985509,30988174,30994715,30999894,	complete_match	ENSMMUG00000001361	30932590	30999894	30932590	30999894	-	IPO8-201	IPO8	protein_coding	protein_coding	ENSMMUP00000001816	XM_001082218	XP_001082218	Importin-8; Importin-8 isoform 1; Uncharacterized protein [Source:UniProtKB/TrEMBL;Acc:F7D6M8]
mmu_circ_021571	chr11_31523743_31535886_R	circRNA	Yes	chr11	31523743	31535886	-	957	12143	3	0,4027,11955	232,537,188	PREDICTED.22099.1	chr11:31519414-31523743|chr11:31535886-31552943	1	1	chr11	-	31457496	31661642	PREDICTED.22099.1	23	31457496,31464368,31467611,31467958,31472800,31474394,31477517,31488168,31488273,31490193,31490212,31499405,31500347,31502102,31508604,31519263,31523743,31527770,31535698,31552943,31569973,31573841,31661338,	31462840,31464543,31467738,31468041,31472988,31474513,31477733,31488220,31488403,31490198,31490294,31499484,31500500,31502234,31508698,31519414,31523975,31528307,31535886,31553610,31570083,31573907,31661642,	potentially_novel_isoform
mmu_circ_021573	chr11_31535698_31535886_R	circRNA	Yes	chr11	31535698	31535886	-	188	188	1	0	188	PREDICTED.22099.1	chr11:31528307-31535698|chr11:31535886-31552943	0	3	chr11	-	31457496	31661642	PREDICTED.22099.1	23	31457496,31464368,31467611,31467958,31472800,31474394,31477517,31488168,31488273,31490193,31490212,31499405,31500347,31502102,31508604,31519263,31523743,31527770,31535698,31552943,31569973,31573841,31661338,	31462840,31464543,31467738,31468041,31472988,31474513,31477733,31488220,31488403,31490198,31490294,31499484,31500500,31502234,31508698,31519414,31523975,31528307,31535886,31553610,31570083,31573907,31661642,	potentially_novel_isoform
mmu_circ_021576	chr11_32687326_32691087_F	circRNA	Yes	chr11	32687326	32691087	+	393	3761	3	0,2725,3604	90,146,157	PREDICTED.21768.2	chr11:32670699-32687326|chr11:32691087-32697094	2	0	chr11	+	32589201	32735246	PREDICTED.21768.2	17	32589201,32652970,32664709,32670191,32687326,32690051,32690930,32697094,32699886,32700248,32711098,32716019,32716556,32717277,32725502,32730131,32732077,	32589546,32653123,32664893,32670699,32687416,32690197,32691087,32697233,32699945,32700395,32711271,32716050,32716649,32717403,32725643,32730272,32735246,	complete_match
mmu_circ_021578	chr11_32804219_32809415_F	circRNA	Yes	chr11	32804219	32809415	+	322	5196	3	0,2766,5033	72,87,163	ENSMMUT00000019172	chr11:32803506-32804219|chr11:32809415-32813132	5	0	chr11	+	32773304	32838546	ENSMMUT00000019172	20	32773304,32796733,32803459,32804219,32806985,32809252,32813132,32814977,32816713,32825307,32825644,32826141,32827996,32831381,32832139,32832541,32834355,32834700,32836759,32837495,	32773480,32796881,32803506,32804291,32807072,32809415,32813253,32815109,32816920,32825428,32825800,32826231,32828089,32831438,32832217,32832574,32834532,32834810,32836919,32838546,	complete_match	ENSMMUG00000013655	32773305	32838546	32773305	32839674	+	DNM1L-201	DNM1L	protein_coding	protein_coding	ENSMMUP00000017954	XM_001086230	XP_002798572	Dynamin-1-like protein isoform 3; Uncharacterized protein [Source:UniProtKB/TrEMBL;Acc:F7GI50]
mmu_circ_021579	chr11_32806985_32809415_F	circRNA	Yes	chr11	32806985	32809415	+	250	2430	2	0,2267	87,163	ENSMMUT00000019172	chr11:32804291-32806985|chr11:32809415-32813132	3	0	chr11	+	32773304	32838546	ENSMMUT00000019172	20	32773304,32796733,32803459,32804219,32806985,32809252,32813132,32814977,32816713,32825307,32825644,32826141,32827996,32831381,32832139,32832541,32834355,32834700,32836759,32837495,	32773480,32796881,32803506,32804291,32807072,32809415,32813253,32815109,32816920,32825428,32825800,32826231,32828089,32831438,32832217,32832574,32834532,32834810,32836919,32838546,	complete_match	ENSMMUG00000013655	32773305	32838546	32773305	32839674	+	DNM1L-201	DNM1L	protein_coding	protein_coding	ENSMMUP00000017954	XM_001086230	XP_002798572	Dynamin-1-like protein isoform 3; Uncharacterized protein [Source:UniProtKB/TrEMBL;Acc:F7GI50]
mmu_circ_021581	chr11_36518121_36577351_F	circRNA	Yes	chr11	36518121	36577351	+	1395	59230	10	0,2557,3067,4030,6517,33818,34627,36048,44192,59147	139,133,49,186,77,533,70,61,64,83	PREDICTED.21687.2	chr11:36515309-36518121|chr11:36577351-36589869	0	2	chr11	+	36490812	36590992	PREDICTED.21687.2	13	36490812,36515269,36518121,36520678,36521188,36522151,36524638,36551939,36552748,36554169,36562313,36577268,36589869,	36490989,36515309,36518260,36520811,36521237,36522337,36524715,36552472,36552818,36554230,36562377,36577351,36590992,	potentially_novel_isoform
mmu_circ_021584	chr11_39020266_39020857_R	circRNA	Yes	chr11	39020266	39020857	-	297	591	2	0,467	173,124	PREDICTED.21844.1	chr11:39011162-39020266|chr11:39020857-39028608	0	3	chr11	-	39007267	39034634	PREDICTED.21844.1	6	39007267,39020266,39020733,39028608,39032624,39034583,	39011162,39020439,39020857,39028860,39032750,39034634,	potentially_novel_isoform
mmu_circ_021586	chr11_39314953_39328052_F	circRNA	Yes	chr11	39314953	39328052	+	398	13099	4	0,2494,7640,12958	57,80,120,141	PREDICTED.21916.3	chr11:39304953-39314953|chr11:39328052-39372067	0	4	chr11	+	39254686	39372111	PREDICTED.21916.3	10	39254686,39264387,39278379,39281666,39304741,39314953,39317447,39322593,39327911,39372067,	39254735,39264479,39278544,39281728,39304953,39315010,39317527,39322713,39328052,39372111,	potentially_novel_isoform
mmu_circ_021589	chr11_3939813_3947593_R	circRNA	Yes	chr11	3939813	3947593	-	530	7780	5	0,211,3932,6654,7651	131,73,76,121,129	PREDICTED.68342.1	chr11:3931271-3939813|chr11:3947593-3971475	1	1	chr11	-	3928505	3971678	PREDICTED.68342.1	8	3928505,3931119,3939813,3940024,3943745,3946467,3947464,3971475,	3929529,3931271,3939944,3940097,3943821,3946588,3947593,3971678,	potentially_novel_isoform
mmu_circ_021593	chr11_42396412_42417683_F	circRNA	Yes	chr11	42396412	42417683	+	846	21271	6	0,2264,13583,14846,15212,21140	143,78,226,170,98,131	PREDICTED.22767.1	chr11:42386329-42396412|chr11:42417683-42424880	0	2	chr11	+	42225397	42440795	PREDICTED.22767.1	21	42225397,42281751,42317534,42343624,42359279,42360281,42360771,42362891,42369488,42381965,42386268,42396412,42398676,42409995,42411258,42411624,42417552,42424880,42429257,42431136,42437755,	42226064,42281814,42317614,42343753,42359345,42360569,42360885,42363007,42369623,42382071,42386329,42396555,42398754,42410221,42411428,42411722,42417683,42425086,42429460,42431242,42440795,	potentially_novel_isoform
mmu_circ_021597	chr11_42971217_42977818_R	circRNA	Yes	chr11	42971217	42977818	-	244	6601	3	0,3490,6523	65,101,78	PREDICTED.22436.1	chr11:42960644-42971217|chr11:42977818-42988338	0	3	chr11	-	42945194	43022404	PREDICTED.22436.1	15	42945194,42948541,42950913,42951175,42952319,42957638,42959262,42960303,42960585,42971217,42974707,42977740,42988338,42990716,43022179,	42948273,42948661,42951063,42951260,42955037,42957745,42959364,42960416,42960644,42971282,42974808,42977818,42988496,42990798,43022404,	potentially_novel_isoform
mmu_circ_021603	chr11_45172226_45177426_R	circRNA	Yes	chr11	45172226	45177426	-	264	5200	3	0,1655,5152	85,131,48	ENSMMUT00000046843	chr11:45166732-45172226|chr11:45177426-45181487	3	0	chr11	-	45166357	45181539	ENSMMUT00000046843	6	45166357,45166601,45172226,45173881,45177378,45181487,	45166399,45166732,45172311,45174012,45177426,45181539,	complete_match	ENSMMUG00000020125	45166358	45181539	45123964	45181539	-	SENP1-202	SENP1	protein_coding	protein_coding	ENSMMUP00000039872			SUMO1/sentrin specific peptidase 1 [Source:HGNC Symbol;Acc:HGNC:17927]
mmu_circ_021611	chr11_46171893_46172068_R	ciRNA	Yes	chr11	46171893	46172068	-	175	175	1	0	175	PREDICTED.77714.2	chr11:46171869-46172068	2	0	chr11	-	46151157	46183651	PREDICTED.77714.2	49	46151157,46153116,46153346,46155038,46156670,46156876,46157701,46157934,46158276,46159141,46159462,46159752,46160034,46162046,46163054,46163397,46163569,46163799,46166102,46168202,46168415,46168713,46170644,46170908,46171080,46171549,46171731,46172068,46172352,46172624,46172857,46173180,46173392,46173736,46175231,46175376,46175571,46175920,46177267,46177965,46178411,46178986,46180124,46181856,461…	46151422,46153247,46153483,46156179,46156798,46157009,46157832,46158110,46158352,46159301,46159630,46159893,46161912,46162953,46163287,46163464,46163654,46163923,46167970,46168339,46168598,46170525,46170695,46170982,46171322,46171634,46171869,46172179,46172418,46172772,46172988,46173294,46173512,46173958,46175279,46175486,46175736,46176102,46177372,46178076,46178525,46180029,46181717,46182002,461…	potentially_novel_isoform
mmu_circ_021624	chr11_47600145_47608537_F	circRNA	Yes	chr11	47600145	47608537	+	530	8392	3	0,852,8179	213,104,213	ENSMMUT00000046660	chr11:47587934-47600145|chr11:47608537-47609777	6	1	chr11	+	47542042	47628914	ENSMMUT00000046660	17	47542042,47571778,47573081,47574905,47579930,47582686,47586015,47587880,47600145,47600997,47608324,47609777,47614377,47621460,47622000,47624140,47626278,	47542104,47571926,47573237,47574981,47580067,47582790,47586126,47587934,47600358,47601101,47608537,47609826,47614539,47621582,47622169,47625969,47628914,	complete_match	ENSMMUG00000008172	47542043	47628914	47542043	47628914	+	LARP4-201	LARP4	protein_coding	protein_coding	ENSMMUP00000039696	XM_001103235	XP_001082051	La ribonucleoprotein domain family, member 4 [Source:HGNC Symbol;Acc:HGNC:24320]
mmu_circ_021625	chr11_47825971_47843371_F	circRNA	Yes	chr11	47825971	47843371	+	1224	17400	9	0,3422,4286,7780,8116,9642,12343,13082,17297	213,156,120,234,53,111,124,110,103	PREDICTED.78196.1	chr11:47812031-47825971|chr11:47843371-47845179	2	0	chr11	+	47648713	47886052	PREDICTED.78196.1	32	47648713,47774498,47790252,47811905,47825971,47829393,47830257,47833751,47834087,47835613,47838314,47839053,47843268,47845179,47847501,47848091,47849627,47850895,47851633,47856322,47858596,47860613,47866591,47870775,47871026,47873636,47875519,47877428,47880346,47881185,47884240,47885236,	47649082,47774570,47790381,47812031,47826184,47829549,47830377,47833985,47834140,47835724,47838438,47839163,47843371,47845244,47847595,47848211,47849742,47851035,47851770,47856403,47858724,47860728,47866793,47870885,47871107,47873760,47875641,47877540,47880456,47881316,47884409,47886052,	potentially_novel_isoform
mmu_circ_021628	chr11_47847501_47866793_F	circRNA	Yes	chr11	47847501	47866793	+	1132	19292	9	0,590,2126,3394,4132,8821,11095,13112,19090	94,120,115,140,137,81,128,115,202	PREDICTED.78196.1	chr11:47845244-47847501|chr11:47866793-47870775	2	0	chr11	+	47648713	47886052	PREDICTED.78196.1	32	47648713,47774498,47790252,47811905,47825971,47829393,47830257,47833751,47834087,47835613,47838314,47839053,47843268,47845179,47847501,47848091,47849627,47850895,47851633,47856322,47858596,47860613,47866591,47870775,47871026,47873636,47875519,47877428,47880346,47881185,47884240,47885236,	47649082,47774570,47790381,47812031,47826184,47829549,47830377,47833985,47834140,47835724,47838438,47839163,47843371,47845244,47847595,47848211,47849742,47851035,47851770,47856403,47858724,47860728,47866793,47870885,47871107,47873760,47875641,47877540,47880456,47881316,47884409,47886052,	potentially_novel_isoform
mmu_circ_021629	chr11_47849627_47866793_F	circRNA	Yes	chr11	47849627	47866793	+	918	17166	7	0,1268,2006,6695,8969,10986,16964	115,140,137,81,128,115,202	PREDICTED.23414.1	chr11:47848211-47849627|chr11:47866793-47870775	0	2	chr11	+	47648860	47901975	PREDICTED.23414.1	38	47648860,47774498,47790252,47811905,47825971,47829393,47830257,47833751,47834087,47835613,47838314,47839053,47843268,47845179,47847501,47848091,47849627,47850895,47851633,47856322,47858596,47860613,47866591,47870775,47871026,47873636,47875519,47877428,47880346,47881185,47884240,47885236,47887305,47888245,47890471,47891926,47893933,47897750,	47649082,47774570,47790381,47812031,47826184,47829549,47830377,47833985,47834140,47835724,47838438,47839163,47843371,47845244,47847595,47848211,47849742,47851035,47851770,47856403,47858724,47860728,47866793,47870885,47871107,47873760,47875641,47877540,47880456,47881316,47884409,47885407,47887367,47888303,47890546,47892104,47894057,47901975,	complete_match
mmu_circ_021631	chr11_47866591_47871107_F	circRNA	Yes	chr11	47866591	47871107	+	393	4516	3	0,4184,4435	202,110,81	PREDICTED.78196.1	chr11:47860728-47866591|chr11:47871107-47873636	1	1	chr11	+	47648713	47886052	PREDICTED.78196.1	32	47648713,47774498,47790252,47811905,47825971,47829393,47830257,47833751,47834087,47835613,47838314,47839053,47843268,47845179,47847501,47848091,47849627,47850895,47851633,47856322,47858596,47860613,47866591,47870775,47871026,47873636,47875519,47877428,47880346,47881185,47884240,47885236,	47649082,47774570,47790381,47812031,47826184,47829549,47830377,47833985,47834140,47835724,47838438,47839163,47843371,47845244,47847595,47848211,47849742,47851035,47851770,47856403,47858724,47860728,47866793,47870885,47871107,47873760,47875641,47877540,47880456,47881316,47884409,47886052,	potentially_novel_isoform
mmu_circ_021634	chr11_47935730_47956619_F	circRNA	Yes	chr11	47935730	47956619	+	460	20889	3	0,16480,20629	99,101,260	PREDICTED.22863.3	chr11:47918097-47935730|chr11:47956619-47965927	0	4	chr11	+	47917861	47980704	PREDICTED.22863.3	9	47917861,47935730,47952210,47956359,47965927,47970423,47970694,47976248,47980678,	47918097,47935829,47952311,47956619,47966058,47970606,47970854,47976781,47980704,	potentially_novel_isoform
mmu_circ_021635	chr11_47970423_47970854_F	circRNA	Yes	chr11	47970423	47970854	+	343	431	2	0,271	183,160	PREDICTED.77749.1	chr11:47966058-47970423|chr11:47970854-47976248	2	1	chr11	+	47916982	47980704	PREDICTED.77749.1	8	47916982,47935730,47952199,47965927,47970423,47970694,47976248,47980678,	47917220,47935829,47952311,47966058,47970606,47970854,47976781,47980704,	potentially_novel_isoform
mmu_circ_021636	chr11_48142499_48148208_R	circRNA	Yes	chr11	48142499	48148208	-	353	5709	3	0,5062,5583	107,120,126	ENSMMUT00000046647	chr11:48141260-48142499|chr11:48148208-48151080	2	0	chr11	-	48122324	48170009	ENSMMUT00000046647	17	48122324,48129375,48131791,48132618,48133214,48133817,48135313,48136722,48137903,48141018,48141189,48142499,48147561,48148082,48151080,48153696,48169985,	48123118,48129429,48131945,48132692,48133364,48133937,48135400,48136881,48138059,48141086,48141260,48142606,48147681,48148208,48151229,48153768,48170009,	complete_match	ENSMMUG00000022961	48122325	48170009	48121129	48171925	-	SLC11A2-202	SLC11A2	protein_coding	protein_coding	ENSMMUP00000039684	XM_001082702	XP_001082702	Natural resistance-associated macrophage protein 2 isoform 1; Uncharacterized protein [Source:UniProtKB/TrEMBL;Acc:F6U6C6]
mmu_circ_021639	chr11_48250443_48252696_R	circRNA	Yes	chr11	48250443	48252696	-	234	2253	3	0,1718,2204	91,94,49	PREDICTED.22897.1	chr11:48248576-48250443|chr11:48252696-48255007	3	0	chr11	-	48242262	48324407	PREDICTED.22897.1	15	48242262,48244486,48247275,48248451,48250443,48252161,48252647,48255007,48255807,48257392,48259858,48265398,48266749,48267678,48323568,	48243700,48244538,48247418,48248576,48250534,48252255,48252696,48255096,48255918,48257545,48259965,48265504,48266826,48267830,48324407,	complete_match
mmu_circ_021641	chr11_48255007_48259965_R	circRNA	Yes	chr11	48255007	48259965	-	460	4958	4	0,800,2385,4851	89,111,153,107	PREDICTED.22897.1	chr11:48252696-48255007|chr11:48259965-48265398	2	0	chr11	-	48242262	48324407	PREDICTED.22897.1	15	48242262,48244486,48247275,48248451,48250443,48252161,48252647,48255007,48255807,48257392,48259858,48265398,48266749,48267678,48323568,	48243700,48244538,48247418,48248576,48250534,48252255,48252696,48255096,48255918,48257545,48259965,48265504,48266826,48267830,48324407,	complete_match
mmu_circ_021643	chr11_4835764_4836466_F	circRNA	Yes	chr11	4835764	4836466	+	409	702	2	0,591	298,111	PREDICTED.19562.1	chr11:4825048-4835764|chr11:4836466-4852821	0	5	chr11	+	4821719	4859005	PREDICTED.19562.1	7	4821719,4824923,4835764,4836355,4852821,4857834,4858758,	4821781,4825048,4836062,4836466,4852988,4858018,4859005,	potentially_novel_isoform
mmu_circ_021652	chr11_50530438_50530893_F	ciRNA	Yes	chr11	50530438	50530893	+	455	455	1	0	455	PREDICTED.78864.1	chr11:50530438-50530916	2	1	chr11	+	50448338	50558642	PREDICTED.78864.1	14	50448338,50527752,50530293,50530916,50531030,50531476,50532677,50534689,50536436,50537930,50541423,50542552,50547602,50555336,	50448381,50527941,50530438,50530940,50531063,50531593,50532684,50534814,50536565,50538017,50541465,50544166,50547772,50558642,	potentially_novel_isoform
mmu_circ_021654	chr11_51519566_51519840_R	ciRNA	Yes	chr11	51519566	51519840	-	274	274	1	0	274	PREDICTED.23263.1	chr11:51519566-51519840	3	0	chr11	-	51510091	51534099	PREDICTED.23263.1	31	51510091,51512110,51513438,51514464,51514684,51515663,51516190,51516402,51516593,51516818,51516997,51517798,51518002,51518440,51518726,51518874,51519029,51519101,51519374,51519840,51520337,51520539,51522646,51522829,51523107,51523736,51523873,51524214,51524466,51526481,51533631,	51511129,51512233,51513540,51514578,51514768,51515813,51516296,51516483,51516673,51516911,51517148,51517866,51518140,51518595,51518818,51518901,51519065,51519147,51519566,51520049,51520390,51520596,51522690,51522874,51523233,51523782,51523935,51524335,51524579,51526612,51534099,	complete_match
mmu_circ_021655	chr11_52855773_52863149_R	circRNA	Yes	chr11	52855773	52863149	-	267	7376	4	0,4199,4496,7276	52,68,47,100	PREDICTED.78817.1	chr11:52854603-52855773|chr11:52863149-52875773	3	0	chr11	-	52845960	52876178	PREDICTED.78817.1	9	52845960,52850354,52854054,52854529,52855773,52859972,52860269,52863049,52875773,	52848903,52850380,52854083,52854603,52855825,52860040,52860316,52863149,52876178,	potentially_novel_isoform
mmu_circ_021656	chr11_52859972_52863149_R	circRNA	Yes	chr11	52859972	52863149	-	215	3177	3	0,297,3077	68,47,100	PREDICTED.78817.1	chr11:52855825-52859972|chr11:52863149-52875773	3	1	chr11	-	52845960	52876178	PREDICTED.78817.1	9	52845960,52850354,52854054,52854529,52855773,52859972,52860269,52863049,52875773,	52848903,52850380,52854083,52854603,52855825,52860040,52860316,52863149,52876178,	potentially_novel_isoform
mmu_circ_021658	chr11_53145797_53147089_F	circRNA	Yes	chr11	53145797	53147089	+	562	1292	5	0,218,444,966,1171	66,119,142,114,121	PREDICTED.78848.1	chr11:53144549-53145797|chr11:53147089-53149446	2	1	chr11	+	53138294	53154183	PREDICTED.78848.1	19	53138294,53141904,53143194,53144423,53145797,53146015,53146241,53146763,53146968,53149446,53149682,53150020,53150439,53150757,53151074,53151956,53153247,53153492,53153785,	53138547,53142056,53143381,53144549,53145863,53146134,53146383,53146877,53147089,53149520,53149773,53150226,53150572,53150848,53151229,53152506,53153367,53153591,53154183,	potentially_novel_isoform
mmu_circ_021662	chr11_53237435_53238089_R	circRNA	Yes	chr11	53237435	53238089	-	229	654	3	0,407,594	131,38,60	ENSMMUT00000011570	chr11:53237125-53237435|chr11:53238089-53239567	0	2	chr11	-	53226609	53248297	ENSMMUT00000011570	27	53226609,53228102,53228351,53228719,53229821,53230229,53231170,53231327,53231679,53232449,53233419,53233486,53237053,53237435,53237842,53238029,53239567,53240070,53240291,53240591,53242406,53242717,53243706,53243892,53245019,53246038,53248186,	53226747,53228269,53228487,53228784,53229983,53230488,53231233,53231447,53231772,53232560,53233462,53233600,53237125,53237566,53237880,53238089,53239692,53240186,53240423,53240667,53242476,53242787,53243799,53243974,53245105,53246158,53248297,	complete_match	ENSMMUG00000008273	53226610	53248297	53226610	53248297	-	SMARCC2-201	SMARCC2	protein_coding	protein_coding	ENSMMUP00000010848		XP_001097669	SWI/SNF related, matrix associated, actin dependent regulator of chromatin, subfamily c, member 2 [Source:HGNC Symbol;Acc:HGNC:11105]
mmu_circ_021663	chr11_53239567_53240667_R	circRNA	Yes	chr11	53239567	53240667	-	449	1100	4	0,503,724,1024	125,116,132,76	PREDICTED.78889.1	chr11:53238089-53239567|chr11:53240667-53242406	2	0	chr11	-	53221059	53248320	PREDICTED.78889.1	15	53221059,53237435,53237842,53238029,53239567,53240070,53240291,53240591,53242406,53242717,53243706,53243892,53245019,53246038,53248186,	53221908,53237566,53237880,53238089,53239692,53240186,53240423,53240667,53242476,53242787,53243799,53243974,53245105,53246158,53248320,	potentially_novel_isoform
mmu_circ_021665	chr11_53354531_53355100_R	circRNA	Yes	chr11	53354531	53355100	-	321	569	2	0,437	189,132	ENSMMUT00000003531	chr11:53348021-53354531|chr11:53355100-53355863	2	0	chr11	-	53343518	53374573	ENSMMUT00000003531	11	53343518,53345409,53346603,53346829,53347821,53354531,53354968,53355863,53358061,53358737,53374368,	53345075,53345619,53346705,53346959,53348021,53354720,53355100,53355929,53358169,53358788,53374573,	complete_match	ENSMMUG00000002483	53343519	53374573	53343519	53374573	-	CS-201	CS	protein_coding	protein_coding	ENSMMUP00000003339	XM_001098147	XP_001098147	Citrate synthase [Source:UniProtKB/TrEMBL;Acc:F7HGU4]
mmu_circ_021667	chr11_53651771_53654676_F	circRNA	Yes	chr11	53651771	53654676	+	309	2905	3	0,919,2747	59,92,158	ENSMMUT00000027150	chr11:53645101-53651771|chr11:53654676-53664490	2	0	chr11	+	53602703	53673055	ENSMMUT00000027150	14	53602703,53644934,53651771,53652690,53654518,53664490,53664705,53665139,53665368,53670368,53671088,53671819,53672449,53672663,	53602860,53645101,53651830,53652782,53654676,53664570,53664815,53665186,53665462,53670446,53671199,53671900,53672536,53673055,	complete_match	ENSMMUG00000019330	53602704	53673055	53602704	53673055	+	RBMS2-201	RBMS2	protein_coding	protein_coding	ENSMMUP00000025399	XM_001115284	XP_001115284	RNA-binding motif, single-stranded-interacting protein 2; Suppressor of CDC2 with RNA-binding motif 3; Uncharacterized protein [Source:UniProtKB/TrEMBL;Acc:F6RVN4]
mmu_circ_021677	chr11_54312837_54312995_R	ciRNA	Yes	chr11	54312837	54312995	-	158	158	1	0	158	ENSMMUT00000030656	chr11:54312825-54312995	2	0	chr11	-	54311910	54320265	ENSMMUT00000030656	12	54311910,54312546,54312773,54312995,54313374,54313603,54316230,54317223,54317798,54318132,54318661,54320073,	54312369,54312684,54312825,54313081,54313424,54313670,54316328,54317296,54317896,54318400,54318728,54320265,	complete_match	ENSMMUG00000021787	54311911	54320265	54311911	54320265	-	STAC3-202	STAC3	protein_coding	protein_coding	ENSMMUP00000028691	XM_001115922	XP_001115922	SH3 and cysteine-rich domain-containing protein 3; Uncharacterized protein [Source:UniProtKB/TrEMBL;Acc:F7DEB5]
mmu_circ_021680	chr11_54355555_54367863_R	circRNA	Yes	chr11	54355555	54367863	-	342	12308	2	0,12199	233,109	ENSMMUT00000030661	chr11:54351870-54355555|chr11:54367863-54368757	1	1	chr11	-	54322896	54369375	ENSMMUT00000030661	14	54322896,54325119,54325539,54328011,54328878,54337071,54338668,54339277,54339680,54340109,54351694,54355555,54367754,54368757,	54324248,54325204,54325637,54328159,54329048,54337172,54338823,54339438,54339807,54340352,54351870,54355788,54367863,54369375,	complete_match	ENSMMUG00000021789	54322897	54369375	54322897	54371786	-	R3HDM2-201	R3HDM2	protein_coding	protein_coding	ENSMMUP00000028696			Uncharacterized protein [Source:UniProtKB/TrEMBL;Acc:F7DE77]
mmu_circ_021682	chr11_54361354_54368898_R	circRNA	Yes	chr11	54361354	54368898	-	282	7544	3	0,6400,7403	32,109,141	ENSMMUT00000030660	chr11:54361256-54361354|chr11:54368898-54369671	4	0	chr11	-	54322896	54371786	ENSMMUT00000030660	19	54322896,54325119,54325539,54328011,54328878,54337071,54338668,54339277,54339680,54340109,54351694,54355555,54361202,54361354,54367754,54368757,54369671,54370429,54371695,	54324248,54325204,54325637,54328159,54329048,54337172,54338823,54339438,54339807,54340352,54351870,54355788,54361256,54361386,54367863,54368898,54369731,54370508,54371786,	complete_match	ENSMMUG00000021789	54322897	54371786	54322897	54371786	-	R3HDM2-202	R3HDM2	protein_coding	protein_coding	ENSMMUP00000028695			Uncharacterized protein [Source:UniProtKB/TrEMBL;Acc:F7DE77]
mmu_circ_021687	chr11_59486212_59506869_F	circRNA	Yes	chr11	59486212	59506869	+	386	20657	3	0,7938,20530	128,131,127	ENSMMUT00000001365	chr11:59451945-59486212|chr11:59506869-59513397	2	0	chr11	+	59451798	59598475	ENSMMUT00000001365	22	59451798,59486212,59494150,59506742,59513397,59517817,59541985,59548216,59575709,59577849,59578088,59583419,59583593,59583787,59584848,59585141,59585801,59586255,59587025,59590275,59595039,59598025,	59451945,59486340,59494281,59506869,59513543,59517879,59542072,59548361,59575883,59578008,59578313,59583503,59583688,59583979,59584964,59585414,59585872,59586371,59587175,59590379,59595128,59598475,	complete_match	ENSMMUG00000000955	59451799	59598475	59451799	59599968	+	USP15-201	USP15	protein_coding	protein_coding	ENSMMUP00000001283		XP_001116743	Ubiquitin carboxyl-terminal hydrolase [Source:UniProtKB/TrEMBL;Acc:F6QY38]
mmu_circ_021692	chr11_59541985_59548361_F	circRNA	Yes	chr11	59541985	59548361	+	232	6376	2	0,6231	87,145	ENSMMUT00000001365	chr11:59517879-59541985|chr11:59548361-59575709	1	2	chr11	+	59451798	59598475	ENSMMUT00000001365	22	59451798,59486212,59494150,59506742,59513397,59517817,59541985,59548216,59575709,59577849,59578088,59583419,59583593,59583787,59584848,59585141,59585801,59586255,59587025,59590275,59595039,59598025,	59451945,59486340,59494281,59506869,59513543,59517879,59542072,59548361,59575883,59578008,59578313,59583503,59583688,59583979,59584964,59585414,59585872,59586371,59587175,59590379,59595128,59598475,	complete_match	ENSMMUG00000000955	59451799	59598475	59451799	59599968	+	USP15-201	USP15	protein_coding	protein_coding	ENSMMUP00000001283		XP_001116743	Ubiquitin carboxyl-terminal hydrolase [Source:UniProtKB/TrEMBL;Acc:F6QY38]
mmu_circ_021706	chr11_61887707_61889997_F	circRNA	Yes	chr11	61887707	61889997	+	253	2290	2	0,2150	113,140	ENSMMUT00000004501	chr11:61865709-61887707|chr11:61889997-61893693	2	0	chr11	+	61849871	61901488	ENSMMUT00000004501	11	61849871,61850489,61852373,61854120,61858457,61860974,61865603,61887707,61889857,61893693,61898181,	61849937,61850555,61852499,61854306,61858626,61861143,61865709,61887820,61889997,61893900,61901488,	complete_match	ENSMMUG00000003180	61849872	61901488	61849872	61901488	+	TBC1D30-201	TBC1D30	protein_coding	protein_coding	ENSMMUP00000004247	XM_001116946	XP_001116946	TBC1 domain family, member 30 [Source:HGNC Symbol;Acc:HGNC:29164]
mmu_circ_021708	chr11_62353370_62405262_F	circRNA	Yes	chr11	62353370	62405262	+	343	51892	4	0,18256,19961,51863	127,109,78,29	PREDICTED.81307.1	chr11:62322583-62353370|chr11:62405262-62500719	12	2	chr11	+	62322324	62514322	PREDICTED.81307.1	7	62322324,62353370,62371626,62373331,62405233,62500719,62510183,	62322583,62353497,62371735,62373409,62405262,62500817,62514322,	potentially_novel_isoform
mmu_circ_021710	chr11_63233743_63241716_F	circRNA	Yes	chr11	63233743	63241716	+	337	7973	4	0,692,1982,7908	65,55,152,65	PREDICTED.23890.1	chr11:63228349-63233743|chr11:63241716-63250232	0	4	chr11	+	63214413	63273076	PREDICTED.23890.1	12	63214413,63228166,63233743,63234435,63235725,63241651,63250232,63251798,63264256,63264717,63264867,63266310,	63214623,63228349,63233808,63234490,63235877,63241716,63250347,63251917,63264455,63264780,63265032,63273076,	complete_match
mmu_circ_021713	chr11_6449984_6451158_R	circRNA	Yes	chr11	6449984	6451158	-	512	1174	4	0,297,668,1020	79,150,129,154	PREDICTED.69182.1	chr11:6447223-6449984|chr11:6451158-6479622	2	0	chr11	-	6444262	6480761	PREDICTED.69182.1	10	6444262,6446087,6446575,6446906,6447149,6449984,6450281,6450652,6451004,6479622,	6445927,6446376,6446604,6447020,6447223,6450063,6450431,6450781,6451158,6480761,	potentially_novel_isoform
mmu_circ_021717	chr11_66519144_66520329_F	circRNA	Yes	chr11	66519144	66520329	+	139	1185	2	0,1142	96,43	PREDICTED.81612.2	chr11:66480206-66519144|chr11:66520329-66550429	8	0	chr11	+	66480170	66551149	PREDICTED.81612.2	4	66480170,66519144,66520286,66550429,	66480206,66519240,66520329,66551149,	unknown_intergenic
mmu_circ_021721	chr11_6733006_6733161_R	ciRNA	Yes	chr11	6733006	6733161	-	155	155	1	0	155	ENSMMUT00000026271	chr11:6732900-6733161	2	0	chr11	-	6722126	6768010	ENSMMUT00000026271	40	6722126,6722913,6725026,6729649,6729886,6730271,6730691,6732554,6732802,6733161,6733656,6734140,6734373,6734551,6734722,6739415,6739743,6740324,6743723,6743950,6744172,6744644,6744946,6745341,6745667,6746593,6747446,6748408,6750535,6750863,6752730,6753174,6753490,6753882,6754230,6762588,6763180,6763481,6763897,6767831,	6722738,6723077,6725222,6729782,6729995,6730409,6730763,6732684,6732900,6733327,6733801,6734274,6734462,6734638,6734903,6739591,6739981,6740449,6743841,6744082,6744314,6744818,6745068,6745479,6745868,6746785,6747543,6748540,6750741,6751067,6752970,6753353,6753626,6754010,6754472,6762594,6763293,6763697,6764019,6768010,	complete_match	ENSMMUG00000018685	6722127	6768010	6722127	6768010	-	CHD4-202	CHD4	protein_coding	protein_coding	ENSMMUP00000024592	XM_001107252	XP_001107252	chromodomain helicase DNA binding protein 4 [Source:HGNC Symbol;Acc:HGNC:1919]
mmu_circ_021728	chr11_6901493_6901912_F	circRNA	Yes	chr11	6901493	6901912	+	258	419	2	0,267	106,152	PREDICTED.69084.1	chr11:6900538-6901493|chr11:6901912-6902090	2	0	chr11	+	6894713	6902738	PREDICTED.69084.1	8	6894713,6895750,6899008,6899306,6900335,6901493,6901760,6902090,	6895288,6895955,6899084,6899395,6900538,6901599,6901912,6902738,	potentially_novel_isoform
mmu_circ_021735	chr11_73802952_73807625_F	circRNA	Yes	chr11	73802952	73807625	+	346	4673	3	0,3859,4528	123,78,145	PREDICTED.83011.1	chr11:73795196-73802952|chr11:73807625-73813098	3	0	chr11	+	73762001	73850271	PREDICTED.83011.1	18	73762001,73795092,73802952,73806811,73807480,73813098,73813813,73818673,73820037,73824811,73826282,73839800,73840737,73843829,73844725,73846231,73847377,73848838,	73762740,73795196,73803075,73806889,73807625,73813163,73813976,73818783,73820163,73824954,73826383,73839925,73840800,73843923,73844809,73846389,73847472,73850271,	potentially_novel_isoform
mmu_circ_021736	chr11_73824811_73840800_F	circRNA	Yes	chr11	73824811	73840800	+	432	15989	4	0,1471,14989,15926	143,101,125,63	PREDICTED.83011.1	chr11:73820163-73824811|chr11:73840800-73843829	1	4	chr11	+	73762001	73850271	PREDICTED.83011.1	18	73762001,73795092,73802952,73806811,73807480,73813098,73813813,73818673,73820037,73824811,73826282,73839800,73840737,73843829,73844725,73846231,73847377,73848838,	73762740,73795196,73803075,73806889,73807625,73813163,73813976,73818783,73820163,73824954,73826383,73839925,73840800,73843923,73844809,73846389,73847472,73850271,	potentially_novel_isoform
mmu_circ_021739	chr11_75053116_75063217_F	circRNA	Yes	chr11	75053116	75063217	+	613	10101	3	0,778,9981	109,384,120	ENSMMUT00000046060	chr11:75025832-75053116|chr11:75063217-75115760	2	2	chr11	+	74934850	75209719	ENSMMUT00000046060	38	74934850,74935619,74959116,74961452,74995230,74999380,75010677,75025716,75053116,75053894,75063097,75115760,75117035,75118243,75120950,75126181,75127736,75136154,75139262,75145302,75147755,75158360,75167808,75174312,75175474,75176174,75178424,75179758,75184249,75186857,75187212,75188936,75196090,75197460,75198164,75199292,75204128,75209601,	74934968,74935672,74959189,74961636,74995299,74999520,75011701,75025832,75053225,75054278,75063217,75115890,75117306,75118949,75121439,75126223,75127897,75136343,75139315,75145326,75147833,75158444,75167920,75174434,75175495,75176347,75178578,75179933,75184347,75186953,75187381,75189172,75196245,75197532,75198361,75199411,75204332,75209719,	complete_match	ENSMMUG00000021329	74934851	75209719	74824382	75212218	+	NAV3-204	NAV3	protein_coding	protein_coding	ENSMMUP00000039101			neuron navigator 3 [Source:HGNC Symbol;Acc:HGNC:15998]
mmu_circ_021742	chr11_75147755_75158444_F	circRNA	Yes	chr11	75147755	75158444	+	162	10689	2	0,10605	78,84	ENSMMUT00000046060	chr11:75145326-75147755|chr11:75158444-75167808	3	0	chr11	+	74934850	75209719	ENSMMUT00000046060	38	74934850,74935619,74959116,74961452,74995230,74999380,75010677,75025716,75053116,75053894,75063097,75115760,75117035,75118243,75120950,75126181,75127736,75136154,75139262,75145302,75147755,75158360,75167808,75174312,75175474,75176174,75178424,75179758,75184249,75186857,75187212,75188936,75196090,75197460,75198164,75199292,75204128,75209601,	74934968,74935672,74959189,74961636,74995299,74999520,75011701,75025832,75053225,75054278,75063217,75115890,75117306,75118949,75121439,75126223,75127897,75136343,75139315,75145326,75147833,75158444,75167920,75174434,75175495,75176347,75178578,75179933,75184347,75186953,75187381,75189172,75196245,75197532,75198361,75199411,75204332,75209719,	complete_match	ENSMMUG00000021329	74934851	75209719	74824382	75212218	+	NAV3-204	NAV3	protein_coding	protein_coding	ENSMMUP00000039101			neuron navigator 3 [Source:HGNC Symbol;Acc:HGNC:15998]
mmu_circ_021744	chr11_76806902_76851781_R	circRNA	Yes	chr11	76806902	76851781	-	555	44879	4	0,4031,17265,44748	145,160,119,131	PREDICTED.24960.1	chr11:76800864-76806902|chr11:76851781-76913858	0	2	chr11	-	76750855	76914338	PREDICTED.24960.1	26	76750855,76754859,76756220,76759545,76764160,76766455,76768300,76772466,76774581,76775743,76776094,76777336,76784663,76785236,76786301,76787514,76788809,76796042,76799439,76799743,76800789,76806902,76810933,76824167,76851650,76913858,	76753396,76755029,76756271,76759593,76764265,76766591,76768317,76772532,76774703,76775909,76776295,76777427,76784840,76785404,76786406,76787609,76789025,76796167,76799597,76799832,76800864,76807047,76811093,76824286,76851781,76914338,	potentially_novel_isoform
mmu_circ_021746	chr11_79372154_79376101_F	circRNA	Yes	chr11	79372154	79376101	+	748	3947	2	0,3799	600,148	ENSMMUT00000003574	chr11:79359306-79372154|chr11:79376101-79398941	2	0	chr11	+	79321307	79443714	ENSMMUT00000003574	16	79321307,79323189,79343826,79350420,79353789,79357396,79359190,79372154,79375953,79398941,79402999,79407011,79425058,79441299,79441945,79443621,	79321566,79323210,79343835,79350450,79353839,79357445,79359306,79372754,79376101,79399036,79403029,79407085,79425152,79441374,79442017,79443714,	complete_match	ENSMMUG00000002514	79321308	79443714	79321308	79443714	+	C12ORF26-202	C12ORF26	protein_coding	protein_coding	ENSMMUP00000003378		XP_001089030	Uncharacterized protein [Source:UniProtKB/TrEMBL;Acc:F7CWU1]
mmu_circ_021748	chr11_80007637_80042295_F	circRNA	Yes	chr11	80007637	80042295	+	261	34658	3	0,23373,34594	82,115,64	PREDICTED.24762.5	chr11:79965554-80007637|chr11:80042295-80112499	0	2	chr11	+	79831678	80115141	PREDICTED.24762.5	12	79831678,79832801,79872211,79906239,79945635,79946171,79947536,79965432,80007637,80031010,80042231,80112499,	79831687,79833372,79873040,79906354,79945721,79946356,79947615,79965554,80007719,80031125,80042295,80115141,	potentially_novel_isoform
mmu_circ_021749	chr11_805863_821478_F	circRNA	Yes	chr11	805863	821478	+	552	15615	3	0,12867,15457	173,221,158	ENSMMUT00000014449	chr11:741413-805863|chr11:821478-847279	2	0	chr11	+	740040	898699	ENSMMUT00000014449	28	740040,805863,818730,821320,847279,849302,851046,852117,862014,869362,870702,871860,872826,873046,874080,874543,875235,875579,876106,878675,880562,881859,885265,886702,888089,890395,897741,898381,	741413,806036,818951,821478,847368,849522,851377,852305,862098,869512,871161,872139,872924,873209,874197,874717,875293,875702,877542,878759,880649,881920,885342,887364,888292,890590,897929,898699,	complete_match	ENSMMUG00000018650	740041	898699	740041	899308	+	WNK1-201	WNK1	protein_coding	protein_coding	ENSMMUP00000013536	XM_001095845	XP_001095845	WNK lysine deficient protein kinase 1 [Source:HGNC Symbol;Acc:HGNC:14540]
mmu_circ_021750	chr11_818730_821478_F	circRNA	Yes	chr11	818730	821478	+	379	2748	2	0,2590	221,158	ENSMMUT00000026212	chr11:806036-818730|chr11:821478-847279	0	2	chr11	+	740654	899308	ENSMMUT00000026212	26	740654,805863,818730,821320,847279,849302,851046,852117,862014,869362,872826,873046,874080,874543,875235,875579,876106,878675,880562,881859,885265,886702,888089,890395,897741,898381,	741413,806036,818951,821478,847368,849522,851377,852305,862098,869512,872924,873209,874197,874717,875293,875702,877542,878759,880649,881920,885342,887364,888292,890590,897929,899308,	complete_match	ENSMMUG00000018650	740655	899308	740041	899308	+	WNK1-202	WNK1	protein_coding	protein_coding	ENSMMUP00000024533	XM_001095637	XP_001095637	WNK lysine deficient protein kinase 1 [Source:HGNC Symbol;Acc:HGNC:14540]
mmu_circ_021752	chr11_84208255_84209317_R	ciRNA	Yes	chr11	84208255	84209317	-	1062	1062	1	0	1062	PREDICTED.84810.1	chr11:84208105-84209317	2	0	chr11	-	84176870	84227988	PREDICTED.84810.1	23	84176870,84179843,84181359,84189084,84191140,84192334,84193094,84195364,84197172,84197420,84199657,84200283,84203048,84203740,84206435,84206715,84207959,84209317,84209929,84210710,84211761,84212175,84227199,	84178833,84179990,84181503,84189190,84191318,84192514,84193234,84195509,84197318,84198848,84199803,84200470,84203198,84203866,84206605,84206863,84208105,84209393,84210016,84210856,84211897,84212256,84227988,	potentially_novel_isoform
mmu_circ_021754	chr11_84583124_84586604_F	circRNA	Yes	chr11	84583124	84586604	+	516	3480	5	0,428,1227,2829,3421	161,157,88,51,59	PREDICTED.85011.1	chr11:84566693-84583124|chr11:84586604-84592904	4	0	chr11	+	84504151	84613661	PREDICTED.85011.1	20	84504151,84547735,84566492,84566662,84583124,84583552,84584351,84585953,84586545,84592904,84596395,84602958,84604455,84607316,84607503,84608271,84608441,84608487,84609453,84611511,	84508063,84547868,84566551,84566693,84583285,84583709,84584439,84586004,84586604,84592976,84596464,84603042,84604535,84607420,84607569,84608283,84608482,84608632,84609584,84613661,	potentially_novel_isoform
mmu_circ_021756	chr11_84713279_84719030_F	circRNA	Yes	chr11	84713279	84719030	+	554	5751	4	0,1255,3704,5573	148,94,134,178	PREDICTED.85081.1	chr11:84710717-84713279|chr11:84719030-84721196	2	0	chr11	+	84634904	84737421	PREDICTED.85081.1	15	84634904,84693318,84703441,84706019,84710537,84713279,84714534,84716983,84718852,84721196,84723476,84726793,84727856,84727981,84731696,	84634969,84693429,84703642,84706122,84710717,84713427,84714628,84717117,84719030,84721318,84723616,84726915,84727872,84728087,84737421,	potentially_novel_isoform
mmu_circ_021760	chr11_84767276_84783293_R	circRNA	Yes	chr11	84767276	84783293	-	1237	16017	8	0,1660,4013,4278,5138,9635,15280,15858	71,242,162,46,101,141,315,159	PREDICTED.84961.2	chr11:84764541-84767276|chr11:84783293-84784674	2	0	chr11	-	84757473	84785652	PREDICTED.84961.2	16	84757473,84761553,84761886,84761965,84763429,84764454,84767276,84768936,84771289,84771554,84772414,84776911,84782556,84783134,84784674,84785552,	84761256,84761591,84761909,84762070,84763532,84764541,84767347,84769178,84771451,84771600,84772515,84777052,84782871,84783293,84784830,84785652,	potentially_novel_isoform
mmu_circ_021761	chr11_84782556_84783293_R	circRNA	Yes	chr11	84782556	84783293	-	491	737	2	0,561	315,176	PREDICTED.24576.1	chr11:84777052-84782556|chr11:84783293-84784674	0	2	chr11	-	84759106	84785312	PREDICTED.24576.1	15	84759106,84761553,84761886,84761965,84763429,84764454,84767276,84768936,84771289,84771554,84772414,84776911,84782556,84783117,84784674,	84761256,84761591,84761909,84762070,84763532,84764541,84767347,84769178,84771451,84771600,84772515,84777052,84782871,84783293,84785312,	potentially_novel_isoform
mmu_circ_021763	chr11_84986470_84987176_F	circRNA	Yes	chr11	84986470	84987176	+	706	706	1	0	706	ENSMMUT00000023594	chr11:84982208-84986470|chr11:84987176-85143230	1	1	chr11	+	84928937	85166473	ENSMMUT00000023594	6	84928937,84982155,84986470,85143230,85161615,85165239,	84929095,84982208,84987176,85144165,85161751,85166473,	complete_match	ENSMMUG00000016793	84928938	85166473	84928938	85169240	+	TMCC1-201	TMCC1	protein_coding	protein_coding	ENSMMUP00000022076			Uncharacterized protein [Source:UniProtKB/TrEMBL;Acc:F7CZG9]
mmu_circ_021769	chr11_86203562_86205762_F	circRNA	Yes	chr11	86203562	86205762	+	403	2200	2	0,2007	210,193	ENSMMUT00000025744	chr11:86197245-86203562|chr11:86205762-86209359	1	1	chr11	+	86190540	86216568	ENSMMUT00000025744	10	86190540,86195685,86196938,86203562,86205569,86209359,86210179,86210536,86213849,86215954,	86190850,86195750,86197245,86203772,86205762,86209459,86210318,86210656,86214095,86216568,	complete_match	ENSMMUG00000018321	86190541	86216568	86190541	86216568	+	RPN1-201	RPN1	protein_coding	protein_coding	ENSMMUP00000024084	XM_001097494	XP_001097494	ribophorin I [Source:HGNC Symbol;Acc:HGNC:10381]
mmu_circ_021771	chr11_885265_888292_F	circRNA	Yes	chr11	885265	888292	+	942	3027	3	0,1437,2824	77,662,203	ENSMMUT00000014449	chr11:881920-885265|chr11:888292-890395	2	0	chr11	+	740040	898699	ENSMMUT00000014449	28	740040,805863,818730,821320,847279,849302,851046,852117,862014,869362,870702,871860,872826,873046,874080,874543,875235,875579,876106,878675,880562,881859,885265,886702,888089,890395,897741,898381,	741413,806036,818951,821478,847368,849522,851377,852305,862098,869512,871161,872139,872924,873209,874197,874717,875293,875702,877542,878759,880649,881920,885342,887364,888292,890590,897929,898699,	complete_match	ENSMMUG00000018650	740041	898699	740041	899308	+	WNK1-201	WNK1	protein_coding	protein_coding	ENSMMUP00000013536	XM_001095845	XP_001095845	WNK lysine deficient protein kinase 1 [Source:HGNC Symbol;Acc:HGNC:14540]
mmu_circ_021777	chr11_90617780_90648665_R	circRNA	Yes	chr11	90617780	90648665	-	932	30885	7	0,837,3654,4910,5470,25423,30713	153,69,134,116,108,180,172	PREDICTED.25030.5	chr11:90610682-90617780|chr11:90648665-90670939	0	2	chr11	-	90576297	90671068	PREDICTED.25030.5	10	90576297,90610601,90617780,90618617,90621434,90622690,90623250,90643203,90648493,90670939,	90576609,90610682,90617933,90618686,90621568,90622806,90623358,90643383,90648665,90671068,	potentially_novel_isoform
mmu_circ_021778	chr11_90643203_90648665_R	circRNA	Yes	chr11	90643203	90648665	-	352	5462	2	0,5290	180,172	ENSMMUT00000005055	chr11:90623358-90643203|chr11:90648665-90670939	1	2	chr11	-	90570969	90671750	ENSMMUT00000005055	12	90570969,90576390,90610601,90617780,90618617,90621434,90622690,90623250,90643203,90648493,90670939,90671604,	90572494,90576609,90610682,90617933,90618686,90621568,90622806,90623358,90643383,90648665,90671024,90671750,	complete_match	ENSMMUG00000003574	90570970	90671750	90570970	90690504	-	POC1B-202	POC1B	protein_coding	protein_coding	ENSMMUP00000004763	XM_001101566	XP_001101566	Uncharacterized protein [Source:UniProtKB/TrEMBL;Acc:F6VRP4]
mmu_circ_021779	chr11_9067993_9070026_F	circRNA	Yes	chr11	9067993	9070026	+	342	2033	3	0,1268,1883	111,81,150	ENSMMUT00000025080	chr11:9065712-9067993|chr11:9070026-9070932	2	0	chr11	+	9062620	9088469	ENSMMUT00000025080	16	9062620,9063990,9065554,9067993,9069261,9069876,9070932,9078344,9080462,9081774,9082179,9083040,9084789,9085109,9085709,9087482,	9062747,9063999,9065712,9068104,9069342,9070026,9071088,9078837,9081247,9081922,9082391,9083155,9084898,9085260,9085941,9088469,	complete_match	ENSMMUG00000017843	9062621	9088469	9062621	9089635	+	PHC1-201	PHC1	protein_coding	protein_coding	ENSMMUP00000023464		XP_001118435	Polyhomeotic-like protein 1; Uncharacterized protein [Source:UniProtKB/TrEMBL;Acc:F7DKR1]
mmu_circ_021784	chr11_9248002_9248892_R	ciRNA	Yes	chr11	9248002	9248892	-	890	890	1	0	890	ENSMMUT00000020932	chr11:9247979-9248892	2	0	chr11	-	9210776	9257099	ENSMMUT00000020932	36	9210776,9211250,9211801,9212805,9213542,9215406,9215702,9217608,9220102,9220698,9221052,9222614,9223008,9223463,9229926,9230608,9231068,9231898,9234205,9235873,9236440,9239475,9240248,9242485,9242790,9245613,9247609,9247864,9248892,9250401,9250944,9251389,9253319,9253537,9254514,9256943,	9210908,9211292,9211904,9212874,9213633,9215534,9215921,9217832,9220283,9220773,9221209,9222702,9223185,9223547,9229978,9230730,9231195,9232127,9234320,9235985,9236602,9239625,9240391,9242549,9243018,9245775,9247719,9247979,9249013,9250486,9251113,9251410,9253372,9253697,9254698,9257099,	complete_match	ENSMMUG00000003238	9210777	9257099	9210777	9257099	-	A2M-201	A2M	protein_coding	protein_coding	ENSMMUP00000019581	XM_001114328	XP_001114328	alpha-2-macroglobulin [Source:HGNC Symbol;Acc:HGNC:7]
mmu_circ_021786	chr11_94050950_94073370_R	circRNA	Yes	chr11	94050950	94073370	-	798	22420	8	0,9268,10314,11060,12070,15035,15191,22292	117,156,122,114,40,66,55,128	ENSMMUT00000003179	chr11:94035479-94050950|chr11:94073370-94101773	1	1	chr11	-	93979363	94101884	ENSMMUT00000003179	29	93979363,93980182,93980887,93981288,93982459,93983620,93985425,93991659,94000948,94003655,94004459,94011105,94011337,94013601,94015317,94019337,94022303,94029194,94030928,94035140,94050950,94060218,94061264,94062010,94063020,94065985,94066141,94073242,94101773,	93979486,93980281,93981008,93981527,93982645,93983752,93985611,93991842,94001143,94003757,94004749,94011146,94011477,94013757,94015431,94019538,94022507,94029314,94031078,94035479,94051067,94060374,94061386,94062124,94063060,94066051,94066196,94073370,94101884,	complete_match	ENSMMUG00000002244	93979364	94101884	93979364	94101884	-	EEA1-201	EEA1	protein_coding	protein_coding	ENSMMUP00000003000		XP_001104577	early endosome antigen 1 [Source:HGNC Symbol;Acc:HGNC:3185]
mmu_circ_021787	chr11_95399411_95416569_F	circRNA	Yes	chr11	95399411	95416569	+	377	17158	3	0,12107,17057	141,135,101	ENSMMUT00000025627	chr11:95380203-95399411|chr11:95416569-95439765	0	2	chr11	+	95378983	95537678	ENSMMUT00000025627	31	95378983,95399411,95411518,95416468,95439765,95449104,95453293,95455670,95456226,95467354,95470183,95473557,95477533,95477856,95481017,95484373,95484779,95488898,95489167,95490693,95495091,95509194,95512023,95524162,95527160,95527287,95528603,95530908,95533760,95533981,95535206,	95380203,95399552,95411653,95416569,95439880,95449252,95453381,95455773,95456313,95467494,95470363,95473645,95477737,95478042,95481120,95484475,95484883,95488937,95489292,95490892,95495238,95509372,95512127,95524217,95527192,95527395,95528767,95531056,95533901,95534056,95537678,	complete_match	ENSMMUG00000018237	95378984	95537678	95378984	95537678	+	PLXNC1-201	PLXNC1	protein_coding	protein_coding	ENSMMUP00000023974	XM_001105619	XP_002798776	Plexin-C1; Uncharacterized protein [Source:UniProtKB/TrEMBL;Acc:F7E0G3]
mmu_circ_021791	chr11_96294147_96299970_R	circRNA	Yes	chr11	96294147	96299970	-	732	5823	5	0,175,1339,2919,5592	91,148,180,82,231	PREDICTED.25347.2	chr11:96289552-96294147|chr11:96299970-96304509	0	2	chr11	-	96262932	96310686	PREDICTED.25347.2	13	96262932,96266071,96269056,96277984,96286760,96289370,96294147,96294322,96295486,96297066,96299739,96304509,96310480,	96263039,96266209,96269196,96278106,96286926,96289552,96294238,96294470,96295666,96297148,96299970,96304583,96310686,	potentially_novel_isoform
mmu_circ_021792	chr11_96373806_96377052_R	circRNA	Yes	chr11	96373806	96377052	-	245	3246	2	0,3089	88,157	ENSMMUT00000026573	chr11:96351732-96373806|chr11:96377052-96380761	1	1	chr11	-	96316881	96452585	ENSMMUT00000026573	21	96316881,96321686,96322946,96327343,96329815,96330808,96332648,96343723,96345659,96346291,96347067,96347222,96351681,96373806,96376895,96380761,96390902,96391018,96405899,96443933,96452346,	96318454,96321835,96323075,96327471,96329918,96330955,96332751,96343803,96345743,96346360,96347139,96347281,96351732,96373894,96377052,96380913,96390933,96391086,96406044,96446361,96452585,	complete_match	ENSMMUG00000018901	96316882	96452585	96316882	96452585	-	FGD6-201	FGD6	protein_coding	protein_coding	ENSMMUP00000024868	XM_001106559	XP_001106559	Uncharacterized protein [Source:UniProtKB/TrEMBL;Acc:F7A0I9]
mmu_circ_021796	chr11_96495369_96517470_F	circRNA	Yes	chr11	96495369	96517470	+	1264	22101	6	0,3446,7116,11946,18612,21907	176,276,138,148,332,194	ENSMMUT00000026576	chr11:96489273-96495369|chr11:96517470-96524117	0	2	chr11	+	96452950	96530921	ENSMMUT00000026576	13	96452950,96483591,96488572,96489183,96495369,96498815,96502485,96507315,96513981,96517276,96524117,96525868,96529917,	96453008,96483723,96488645,96489273,96495545,96499091,96502623,96507463,96514313,96517470,96524218,96526076,96530921,	complete_match	ENSMMUG00000018903	96452951	96530921	96452910	96530923	+	VEZT-204	VEZT	protein_coding	protein_coding	ENSMMUP00000024871			Uncharacterized protein [Source:UniProtKB/TrEMBL;Acc:F6TT91]
mmu_circ_021799	chr11_97530345_97545861_R	circRNA	Yes	chr11	97530345	97545861	-	446	15516	3	0,4808,15369	134,165,147	PREDICTED.87833.1	chr11:97528193-97530345|chr11:97545861-97612424	3	0	chr11	-	97495384	97612668	PREDICTED.87833.1	16	97495384,97500044,97501129,97503289,97503908,97506413,97512222,97514424,97514786,97515735,97517737,97528067,97530345,97535153,97545714,97612424,	97498418,97500135,97501172,97503395,97504006,97506534,97512346,97514487,97514881,97515850,97517794,97528193,97530479,97535318,97545861,97612668,	potentially_novel_isoform
mmu_circ_021802	chr11_99958103_99987521_R	circRNA	Yes	chr11	99958103	99987521	-	438	29418	5	0,8382,8609,26930,29289	138,87,8,76,129	ENSMMUT00000031516	chr11:99936315-99958103|chr11:99987521-100018588	2	0	chr11	-	99920394	100711574	ENSMMUT00000031516	16	99920394,99936147,99958103,99966485,99966712,99985033,99987392,100018588,100238415,100271085,100342150,100432566,100434490,100601838,100652756,100711438,	99920469,99936315,99958241,99966572,99966720,99985109,99987521,100018696,100238568,100271184,100342257,100432627,100435080,100602019,100652893,100711574,	complete_match	ENSMMUG00000022406	99920395	100711574	99920395	101207462	-	ANKS1B-201	ANKS1B	protein_coding	protein_coding	ENSMMUP00000029488			Amyloid-beta protein intracellular domain-associated protein 1; Uncharacterized protein [Source:UniProtKB/TrEMBL;Acc:F6U0T1]
mmu_circ_021804	chr12_101593810_101620692_F	circRNA	Yes	chr12	101593810	101620692	+	1015	26882	11	0,1470,5338,15072,15900,17887,19994,22762,24113,25398,26740	45,66,78,36,126,72,171,93,93,93,142	ENSMMUT00000004792	chr12:101588154-101593810|chr12:101620692-101630375	2	0	chr12	+	101567723	101647806	ENSMMUT00000004792	23	101567723,101567870,101577674,101579439,101580666,101583433,101588094,101593810,101595280,101599148,101608882,101609710,101611697,101613804,101616572,101617923,101619208,101620550,101630375,101632506,101633298,101634762,101646913,	101567818,101567889,101577722,101579484,101580717,101583472,101588154,101593855,101595346,101599226,101608918,101609836,101611769,101613975,101616665,101618016,101619301,101620692,101630425,101632624,101633378,101634867,101647806,	complete_match	ENSMMUG00000003386	101567724	101647806	101551296	101647806	+	LRRFIP1-204	LRRFIP1	protein_coding	protein_coding	ENSMMUP00000004518			leucine rich repeat (in FLII) interacting protein 1 [Source:HGNC Symbol;Acc:HGNC:6702]
mmu_circ_021811	chr12_102204930_102228458_F	circRNA	Yes	chr12	102204930	102228458	+	504	23528	7	0,14417,15717,16272,19964,20311,23451	76,21,85,84,124,37,77	PREDICTED.33154.2	chr12:102203884-102204930|chr12:102228458-102268494	0	2	chr12	+	102191459	102272001	PREDICTED.33154.2	15	102191459,102196333,102196834,102199683,102199923,102203812,102204930,102219347,102220647,102221202,102224894,102225241,102228381,102268494,102270434,	102191800,102196402,102196996,102199827,102200340,102203884,102205006,102219368,102220732,102221286,102225018,102225278,102228458,102268715,102272001,	potentially_novel_isoform
mmu_circ_021812	chr12_103060128_103073572_R	circRNA	Yes	chr12	103060128	103073572	-	396	13444	2	0,13199	151,245	ENSMMUT00000008496	chr12:103048099-103060128|chr12:103073572-103115116	2	0	chr12	-	102933966	103115207	ENSMMUT00000008496	28	102933966,102934343,102935608,102947495,102949282,102961444,102962305,102962406,102962553,102962819,102967544,102967735,102970450,102975533,102983317,102988590,102992529,102996140,103007122,103015603,103015886,103021071,103026324,103042113,103047978,103060128,103073327,103115116,	102934006,102934485,102935693,102947629,102949401,102961469,102962311,102962469,102962677,102962839,102967615,102967791,102970558,102975580,102983438,102988724,102992716,102996398,103007346,103015802,103016003,103021184,103026456,103042235,103048099,103060279,103073572,103115207,	complete_match	ENSMMUG00000006077	102933967	103115207	102933967	103115207	-	HDAC4-201	HDAC4	protein_coding	protein_coding	ENSMMUP00000007984		XP_002799148	histone deacetylase 4 [Source:HGNC Symbol;Acc:HGNC:14063]
mmu_circ_021814	chr12_104461364_104461510_F	ciRNA	Yes	chr12	104461364	104461510	+	146	146	1	0	146	PREDICTED.33260.2	chr12:104461364-104461539	0	2	chr12	+	104451422	104461955	PREDICTED.33260.2	9	104451422,104454026,104455388,104456503,104458777,104459413,104459862,104461161,104461539,	104451740,104454158,104455585,104456721,104458919,104459580,104460143,104461364,104461955,	potentially_novel_isoform
mmu_circ_021815	chr12_104952752_104952984_F	ciRNA	Yes	chr12	104952752	104952984	+	232	232	1	0	232	ENSMMUT00000007006	chr12:104952752-104953008	2	0	chr12	+	104944016	104987619	ENSMMUT00000007006	25	104944016,104952300,104952647,104953008,104953799,104955729,104956027,104956339,104956711,104959332,104960127,104960554,104961306,104961761,104964417,104965509,104966520,104966899,104968188,104968386,104969840,104982190,104982788,104986543,104987582,	104944131,104952426,104952752,104953122,104953916,104955846,104956144,104956453,104956885,104959446,104960241,104960668,104961420,104962058,104964601,104965622,104966741,104966922,104968311,104968469,104969939,104982307,104982876,104986627,104987619,	complete_match	ENSMMUG00000004968	104944017	104987619	104944017	104987619	+	SNED1-201	SNED1	protein_coding	protein_coding	ENSMMUP00000006586			Uncharacterized protein [Source:UniProtKB/TrEMBL;Acc:F7C1N9]
mmu_circ_021820	chr12_105261757_105262344_F	ciRNA	Yes	chr12	105261757	105262344	+	587	587	1	0	587	ENSMMUT00000044261	chr12:105261757-105262391	2	0	chr12	+	105233258	105271611	ENSMMUT00000044261	13	105233258,105241375,105243466,105254405,105255258,105256649,105256942,105261655,105262391,105265379,105267036,105269235,105271055,	105233344,105241401,105243587,105254492,105255382,105256784,105257060,105261757,105262537,105265463,105267094,105269366,105271611,	complete_match	ENSMMUG00000004736	105233259	105271611	105232686	105271647	+	SEPT2-203	SEPT2	protein_coding	protein_coding	ENSMMUP00000037275		XP_001109436	Septin-2; Uncharacterized protein [Source:UniProtKB/TrEMBL;Acc:F6R3X6]
mmu_circ_021823	chr12_105330031_105339403_F	circRNA	Yes	chr12	105330031	105339403	+	440	9372	5	0,1009,3374,6970,9257	105,43,79,98,115	PREDICTED.115897.1	chr12:105292554-105330031|chr12:105339403-105343951	2	3	chr12	+	105275411	105393577	PREDICTED.115897.1	17	105275411,105292345,105330031,105331040,105333405,105337001,105339288,105343951,105361251,105363783,105364916,105366031,105371103,105386295,105391969,105392748,105393325,	105275514,105292554,105330136,105331083,105333484,105337099,105339403,105344099,105361347,105363947,105364985,105366089,105371359,105386471,105392059,105392882,105393577,	potentially_novel_isoform
mmu_circ_021824	chr12_105330031_105361347_F	circRNA	Yes	chr12	105330031	105361347	+	684	31316	7	0,1009,3374,6970,9257,13920,31220	105,43,79,98,115,148,96	PREDICTED.115897.1	chr12:105292554-105330031|chr12:105361347-105363783	2	0	chr12	+	105275411	105393577	PREDICTED.115897.1	17	105275411,105292345,105330031,105331040,105333405,105337001,105339288,105343951,105361251,105363783,105364916,105366031,105371103,105386295,105391969,105392748,105393325,	105275514,105292554,105330136,105331083,105333484,105337099,105339403,105344099,105361347,105363947,105364985,105366089,105371359,105386471,105392059,105392882,105393577,	potentially_novel_isoform
mmu_circ_021825	chr12_105333405_105339403_F	circRNA	Yes	chr12	105333405	105339403	+	292	5998	3	0,3596,5883	79,98,115	PREDICTED.115897.1	chr12:105331083-105333405|chr12:105339403-105343951	1	2	chr12	+	105275411	105393577	PREDICTED.115897.1	17	105275411,105292345,105330031,105331040,105333405,105337001,105339288,105343951,105361251,105363783,105364916,105366031,105371103,105386295,105391969,105392748,105393325,	105275514,105292554,105330136,105331083,105333484,105337099,105339403,105344099,105361347,105363947,105364985,105366089,105371359,105386471,105392059,105392882,105393577,	potentially_novel_isoform
mmu_circ_021826	chr12_105363783_105366089_F	circRNA	Yes	chr12	105363783	105366089	+	291	2306	3	0,1133,2248	164,69,58	PREDICTED.115897.1	chr12:105361347-105363783|chr12:105366089-105371103	2	0	chr12	+	105275411	105393577	PREDICTED.115897.1	17	105275411,105292345,105330031,105331040,105333405,105337001,105339288,105343951,105361251,105363783,105364916,105366031,105371103,105386295,105391969,105392748,105393325,	105275514,105292554,105330136,105331083,105333484,105337099,105339403,105344099,105361347,105363947,105364985,105366089,105371359,105386471,105392059,105392882,105393577,	potentially_novel_isoform
mmu_circ_021829	chr12_11494627_11502122_R	circRNA	Yes	chr12	11494627	11502122	-	375	7495	3	0,4506,7446	174,152,49	ENSMMUT00000045365	chr12:11489742-11494627|chr12:11502122-11505645	5	0	chr12	-	11481602	11523135	ENSMMUT00000045365	11	11481602,11485484,11489655,11494627,11499133,11502073,11505645,11506134,11519936,11520635,11523091,	11481989,11485593,11489742,11494801,11499285,11502122,11505731,11506210,11520027,11520712,11523135,	complete_match	ENSMMUG00000000043	11481603	11523135	11481067	11523136	-	ORC4-202	ORC4	protein_coding	protein_coding	ENSMMUP00000038391			origin recognition complex, subunit 4 [Source:HGNC Symbol;Acc:HGNC:8490]
mmu_circ_021832	chr12_15128758_15142136_R	circRNA	Yes	chr12	15128758	15142136	-	1197	13378	11	0,406,1700,2143,2431,3395,3792,4178,6214,12720,13285	107,147,93,184,108,93,93,93,93,93,93	ENSMMUT00000012054	chr12:15125185-15128758|chr12:15142136-15144499	2	0	chr12	-	15125014	15378176	ENSMMUT00000012054	130	15125014,15128758,15129164,15130458,15130901,15131189,15132153,15132550,15132936,15134972,15141478,15142043,15144499,15145214,15145943,15147036,15151855,15152700,15153440,15153938,15155598,15157766,15158412,15159110,15163740,15163942,15164579,15165372,15165573,15166331,15166893,15168614,15170431,15171268,15173615,15175093,15176529,15177266,15177535,15180119,15180468,15181228,15185682,15186140,151…	15125185,15128865,15129311,15130551,15131085,15131297,15132246,15132643,15133029,15135065,15141571,15142136,15144592,15145307,15146048,15147141,15151960,15152814,15153551,15154049,15155703,15157871,15158517,15159221,15163845,15164044,15164690,15165483,15165678,15166436,15166998,15168719,15170539,15171373,15173720,15175198,15176634,15177371,15177640,15180224,15180573,15181333,15185793,15186239,151…	complete_match	ENSMMUG00000008615	15125015	15378176	15124612	15381693	-			protein_coding	protein_coding	ENSMMUP00000011307	XM_001084585	XP_001084585	Uncharacterized protein [Source:UniProtKB/TrEMBL;Acc:F7FCY1]
mmu_circ_021834	chr12_15132936_15142136_R	circRNA	Yes	chr12	15132936	15142136	-	372	9200	4	0,2036,8542,9107	93,93,93,93	ENSMMUT00000012054	chr12:15132643-15132936|chr12:15142136-15144499	0	2	chr12	-	15125014	15378176	ENSMMUT00000012054	130	15125014,15128758,15129164,15130458,15130901,15131189,15132153,15132550,15132936,15134972,15141478,15142043,15144499,15145214,15145943,15147036,15151855,15152700,15153440,15153938,15155598,15157766,15158412,15159110,15163740,15163942,15164579,15165372,15165573,15166331,15166893,15168614,15170431,15171268,15173615,15175093,15176529,15177266,15177535,15180119,15180468,15181228,15185682,15186140,151…	15125185,15128865,15129311,15130551,15131085,15131297,15132246,15132643,15133029,15135065,15141571,15142136,15144592,15145307,15146048,15147141,15151960,15152814,15153551,15154049,15155703,15157871,15158517,15159221,15163845,15164044,15164690,15165483,15165678,15166436,15166998,15168719,15170539,15171373,15173720,15175198,15176634,15177371,15177640,15180224,15180573,15181333,15185793,15186239,151…	complete_match	ENSMMUG00000008615	15125015	15378176	15124612	15381693	-			protein_coding	protein_coding	ENSMMUP00000011307	XM_001084585	XP_001084585	Uncharacterized protein [Source:UniProtKB/TrEMBL;Acc:F7FCY1]
mmu_circ_021835	chr12_15134972_15141571_R	circRNA	Yes	chr12	15134972	15141571	-	186	6599	2	0,6506	93,93	ENSMMUT00000012054	chr12:15133029-15134972|chr12:15141571-15142043	0	2	chr12	-	15125014	15378176	ENSMMUT00000012054	130	15125014,15128758,15129164,15130458,15130901,15131189,15132153,15132550,15132936,15134972,15141478,15142043,15144499,15145214,15145943,15147036,15151855,15152700,15153440,15153938,15155598,15157766,15158412,15159110,15163740,15163942,15164579,15165372,15165573,15166331,15166893,15168614,15170431,15171268,15173615,15175093,15176529,15177266,15177535,15180119,15180468,15181228,15185682,15186140,151…	15125185,15128865,15129311,15130551,15131085,15131297,15132246,15132643,15133029,15135065,15141571,15142136,15144592,15145307,15146048,15147141,15151960,15152814,15153551,15154049,15155703,15157871,15158517,15159221,15163845,15164044,15164690,15165483,15165678,15166436,15166998,15168719,15170539,15171373,15173720,15175198,15176634,15177371,15177640,15180224,15180573,15181333,15185793,15186239,151…	complete_match	ENSMMUG00000008615	15125015	15378176	15124612	15381693	-			protein_coding	protein_coding	ENSMMUP00000011307	XM_001084585	XP_001084585	Uncharacterized protein [Source:UniProtKB/TrEMBL;Acc:F7FCY1]
mmu_circ_021836	chr12_15134972_15142136_R	circRNA	Yes	chr12	15134972	15142136	-	279	7164	3	0,6506,7071	93,93,93	ENSMMUT00000012054	chr12:15133029-15134972|chr12:15142136-15144499	0	2	chr12	-	15125014	15378176	ENSMMUT00000012054	130	15125014,15128758,15129164,15130458,15130901,15131189,15132153,15132550,15132936,15134972,15141478,15142043,15144499,15145214,15145943,15147036,15151855,15152700,15153440,15153938,15155598,15157766,15158412,15159110,15163740,15163942,15164579,15165372,15165573,15166331,15166893,15168614,15170431,15171268,15173615,15175093,15176529,15177266,15177535,15180119,15180468,15181228,15185682,15186140,151…	15125185,15128865,15129311,15130551,15131085,15131297,15132246,15132643,15133029,15135065,15141571,15142136,15144592,15145307,15146048,15147141,15151960,15152814,15153551,15154049,15155703,15157871,15158517,15159221,15163845,15164044,15164690,15165483,15165678,15166436,15166998,15168719,15170539,15171373,15173720,15175198,15176634,15177371,15177640,15180224,15180573,15181333,15185793,15186239,151…	complete_match	ENSMMUG00000008615	15125015	15378176	15124612	15381693	-			protein_coding	protein_coding	ENSMMUP00000011307	XM_001084585	XP_001084585	Uncharacterized protein [Source:UniProtKB/TrEMBL;Acc:F7FCY1]
mmu_circ_021837	chr12_15141478_15142136_R	circRNA	Yes	chr12	15141478	15142136	-	186	658	2	0,565	93,93	ENSMMUT00000012054	chr12:15135065-15141478|chr12:15142136-15144499	2	9	chr12	-	15125014	15378176	ENSMMUT00000012054	130	15125014,15128758,15129164,15130458,15130901,15131189,15132153,15132550,15132936,15134972,15141478,15142043,15144499,15145214,15145943,15147036,15151855,15152700,15153440,15153938,15155598,15157766,15158412,15159110,15163740,15163942,15164579,15165372,15165573,15166331,15166893,15168614,15170431,15171268,15173615,15175093,15176529,15177266,15177535,15180119,15180468,15181228,15185682,15186140,151…	15125185,15128865,15129311,15130551,15131085,15131297,15132246,15132643,15133029,15135065,15141571,15142136,15144592,15145307,15146048,15147141,15151960,15152814,15153551,15154049,15155703,15157871,15158517,15159221,15163845,15164044,15164690,15165483,15165678,15166436,15166998,15168719,15170539,15171373,15173720,15175198,15176634,15177371,15177640,15180224,15180573,15181333,15185793,15186239,151…	complete_match	ENSMMUG00000008615	15125015	15378176	15124612	15381693	-			protein_coding	protein_coding	ENSMMUP00000011307	XM_001084585	XP_001084585	Uncharacterized protein [Source:UniProtKB/TrEMBL;Acc:F7FCY1]
mmu_circ_021838	chr12_15141478_15153551_R	circRNA	Yes	chr12	15141478	15153551	-	912	12073	9	0,565,3021,3736,4465,5558,10377,11222,11962	93,93,93,93,105,105,105,114,111	ENSMMUT00000012054	chr12:15135065-15141478|chr12:15153551-15153938	1	2	chr12	-	15125014	15378176	ENSMMUT00000012054	130	15125014,15128758,15129164,15130458,15130901,15131189,15132153,15132550,15132936,15134972,15141478,15142043,15144499,15145214,15145943,15147036,15151855,15152700,15153440,15153938,15155598,15157766,15158412,15159110,15163740,15163942,15164579,15165372,15165573,15166331,15166893,15168614,15170431,15171268,15173615,15175093,15176529,15177266,15177535,15180119,15180468,15181228,15185682,15186140,151…	15125185,15128865,15129311,15130551,15131085,15131297,15132246,15132643,15133029,15135065,15141571,15142136,15144592,15145307,15146048,15147141,15151960,15152814,15153551,15154049,15155703,15157871,15158517,15159221,15163845,15164044,15164690,15165483,15165678,15166436,15166998,15168719,15170539,15171373,15173720,15175198,15176634,15177371,15177640,15180224,15180573,15181333,15185793,15186239,151…	complete_match	ENSMMUG00000008615	15125015	15378176	15124612	15381693	-			protein_coding	protein_coding	ENSMMUP00000011307	XM_001084585	XP_001084585	Uncharacterized protein [Source:UniProtKB/TrEMBL;Acc:F7FCY1]
mmu_circ_021843	chr12_15153440_15154049_R	circRNA	Yes	chr12	15153440	15154049	-	222	609	2	0,498	111,111	PREDICTED.56649.5	chr12:15152814-15153440|chr12:15154049-15155598	0	4	chr12	-	15124745	15285152	PREDICTED.56649.5	76	15124745,15128758,15129164,15130458,15130901,15131189,15132153,15132939,15142043,15144499,15145214,15145943,15147036,15151855,15152700,15153440,15153938,15155598,15157766,15158412,15159110,15163740,15163942,15164579,15165372,15165573,15166331,15166893,15168614,15170431,15171268,15172835,15175093,15176529,15177266,15177535,15180119,15180468,15181228,15185682,15186140,15187221,15187424,15188097,151…	15125185,15128865,15129311,15130551,15131085,15131297,15132162,15133029,15142136,15144592,15145307,15146048,15147141,15151960,15152814,15153551,15154049,15155703,15157871,15158517,15159221,15163845,15164044,15164690,15165483,15165678,15166436,15166998,15168719,15170539,15171373,15172940,15175198,15176634,15177371,15177640,15180224,15180573,15181333,15185793,15186239,15187326,15187529,15188205,151…	potentially_novel_isoform
mmu_circ_021844	chr12_15157766_15165483_R	circRNA	Yes	chr12	15157766	15165483	-	750	7717	7	0,646,1344,5974,6176,6813,7606	105,105,111,105,102,111,111	ENSMMUT00000012054	chr12:15155703-15157766|chr12:15165483-15165573	2	0	chr12	-	15125014	15378176	ENSMMUT00000012054	130	15125014,15128758,15129164,15130458,15130901,15131189,15132153,15132550,15132936,15134972,15141478,15142043,15144499,15145214,15145943,15147036,15151855,15152700,15153440,15153938,15155598,15157766,15158412,15159110,15163740,15163942,15164579,15165372,15165573,15166331,15166893,15168614,15170431,15171268,15173615,15175093,15176529,15177266,15177535,15180119,15180468,15181228,15185682,15186140,151…	15125185,15128865,15129311,15130551,15131085,15131297,15132246,15132643,15133029,15135065,15141571,15142136,15144592,15145307,15146048,15147141,15151960,15152814,15153551,15154049,15155703,15157871,15158517,15159221,15163845,15164044,15164690,15165483,15165678,15166436,15166998,15168719,15170539,15171373,15173720,15175198,15176634,15177371,15177640,15180224,15180573,15181333,15185793,15186239,151…	complete_match	ENSMMUG00000008615	15125015	15378176	15124612	15381693	-			protein_coding	protein_coding	ENSMMUP00000011307	XM_001084585	XP_001084585	Uncharacterized protein [Source:UniProtKB/TrEMBL;Acc:F7FCY1]
mmu_circ_021850	chr12_15180119_15180573_R	circRNA	Yes	chr12	15180119	15180573	-	210	454	2	0,349	105,105	ENSMMUT00000012054	chr12:15177640-15180119|chr12:15180573-15181228	1	3	chr12	-	15125014	15378176	ENSMMUT00000012054	130	15125014,15128758,15129164,15130458,15130901,15131189,15132153,15132550,15132936,15134972,15141478,15142043,15144499,15145214,15145943,15147036,15151855,15152700,15153440,15153938,15155598,15157766,15158412,15159110,15163740,15163942,15164579,15165372,15165573,15166331,15166893,15168614,15170431,15171268,15173615,15175093,15176529,15177266,15177535,15180119,15180468,15181228,15185682,15186140,151…	15125185,15128865,15129311,15130551,15131085,15131297,15132246,15132643,15133029,15135065,15141571,15142136,15144592,15145307,15146048,15147141,15151960,15152814,15153551,15154049,15155703,15157871,15158517,15159221,15163845,15164044,15164690,15165483,15165678,15166436,15166998,15168719,15170539,15171373,15173720,15175198,15176634,15177371,15177640,15180224,15180573,15181333,15185793,15186239,151…	complete_match	ENSMMUG00000008615	15125015	15378176	15124612	15381693	-			protein_coding	protein_coding	ENSMMUP00000011307	XM_001084585	XP_001084585	Uncharacterized protein [Source:UniProtKB/TrEMBL;Acc:F7FCY1]
mmu_circ_021857	chr12_15201865_15202244_R	ciRNA	Yes	chr12	15201865	15202244	-	379	379	1	0	379	ENSMMUT00000012054	chr12:15201845-15202244	1	1	chr12	-	15125014	15378176	ENSMMUT00000012054	130	15125014,15128758,15129164,15130458,15130901,15131189,15132153,15132550,15132936,15134972,15141478,15142043,15144499,15145214,15145943,15147036,15151855,15152700,15153440,15153938,15155598,15157766,15158412,15159110,15163740,15163942,15164579,15165372,15165573,15166331,15166893,15168614,15170431,15171268,15173615,15175093,15176529,15177266,15177535,15180119,15180468,15181228,15185682,15186140,151…	15125185,15128865,15129311,15130551,15131085,15131297,15132246,15132643,15133029,15135065,15141571,15142136,15144592,15145307,15146048,15147141,15151960,15152814,15153551,15154049,15155703,15157871,15158517,15159221,15163845,15164044,15164690,15165483,15165678,15166436,15166998,15168719,15170539,15171373,15173720,15175198,15176634,15177371,15177640,15180224,15180573,15181333,15185793,15186239,151…	complete_match	ENSMMUG00000008615	15125015	15378176	15124612	15381693	-			protein_coding	protein_coding	ENSMMUP00000011307	XM_001084585	XP_001084585	Uncharacterized protein [Source:UniProtKB/TrEMBL;Acc:F7FCY1]
mmu_circ_021858	chr12_15202442_15203185_R	ciRNA	Yes	chr12	15202442	15203185	-	743	743	1	0	743	PREDICTED.56649.5	chr12:15202442-15203185	0	3	chr12	-	15124745	15285152	PREDICTED.56649.5	76	15124745,15128758,15129164,15130458,15130901,15131189,15132153,15132939,15142043,15144499,15145214,15145943,15147036,15151855,15152700,15153440,15153938,15155598,15157766,15158412,15159110,15163740,15163942,15164579,15165372,15165573,15166331,15166893,15168614,15170431,15171268,15172835,15175093,15176529,15177266,15177535,15180119,15180468,15181228,15185682,15186140,15187221,15187424,15188097,151…	15125185,15128865,15129311,15130551,15131085,15131297,15132162,15133029,15142136,15144592,15145307,15146048,15147141,15151960,15152814,15153551,15154049,15155703,15157871,15158517,15159221,15163845,15164044,15164690,15165483,15165678,15166436,15166998,15168719,15170539,15171373,15172940,15175198,15176634,15177371,15177640,15180224,15180573,15181333,15185793,15186239,15187326,15187529,15188205,151…	potentially_novel_isoform
mmu_circ_021862	chr12_15203537_15204625_R	ciRNA	Yes	chr12	15203537	15204625	-	1088	1088	1	0	1088	PREDICTED.56649.5	chr12:15203510-15204625	0	2	chr12	-	15124745	15285152	PREDICTED.56649.5	76	15124745,15128758,15129164,15130458,15130901,15131189,15132153,15132939,15142043,15144499,15145214,15145943,15147036,15151855,15152700,15153440,15153938,15155598,15157766,15158412,15159110,15163740,15163942,15164579,15165372,15165573,15166331,15166893,15168614,15170431,15171268,15172835,15175093,15176529,15177266,15177535,15180119,15180468,15181228,15185682,15186140,15187221,15187424,15188097,151…	15125185,15128865,15129311,15130551,15131085,15131297,15132162,15133029,15142136,15144592,15145307,15146048,15147141,15151960,15152814,15153551,15154049,15155703,15157871,15158517,15159221,15163845,15164044,15164690,15165483,15165678,15166436,15166998,15168719,15170539,15171373,15172940,15175198,15176634,15177371,15177640,15180224,15180573,15181333,15185793,15186239,15187326,15187529,15188205,151…	potentially_novel_isoform
mmu_circ_021865	chr12_15208038_15208207_R	ciRNA	Yes	chr12	15208038	15208207	-	169	169	1	0	169	PREDICTED.56649.5	chr12:15208004-15208207	0	2	chr12	-	15124745	15285152	PREDICTED.56649.5	76	15124745,15128758,15129164,15130458,15130901,15131189,15132153,15132939,15142043,15144499,15145214,15145943,15147036,15151855,15152700,15153440,15153938,15155598,15157766,15158412,15159110,15163740,15163942,15164579,15165372,15165573,15166331,15166893,15168614,15170431,15171268,15172835,15175093,15176529,15177266,15177535,15180119,15180468,15181228,15185682,15186140,15187221,15187424,15188097,151…	15125185,15128865,15129311,15130551,15131085,15131297,15132162,15133029,15142136,15144592,15145307,15146048,15147141,15151960,15152814,15153551,15154049,15155703,15157871,15158517,15159221,15163845,15164044,15164690,15165483,15165678,15166436,15166998,15168719,15170539,15171373,15172940,15175198,15176634,15177371,15177640,15180224,15180573,15181333,15185793,15186239,15187326,15187529,15188205,151…	potentially_novel_isoform
mmu_circ_021868	chr12_15288495_15289812_R	ciRNA	Yes	chr12	15288495	15289812	-	1317	1317	1	0	1317	ENSMMUT00000012054	chr12:15288443-15289812	2	0	chr12	-	15125014	15378176	ENSMMUT00000012054	130	15125014,15128758,15129164,15130458,15130901,15131189,15132153,15132550,15132936,15134972,15141478,15142043,15144499,15145214,15145943,15147036,15151855,15152700,15153440,15153938,15155598,15157766,15158412,15159110,15163740,15163942,15164579,15165372,15165573,15166331,15166893,15168614,15170431,15171268,15173615,15175093,15176529,15177266,15177535,15180119,15180468,15181228,15185682,15186140,151…	15125185,15128865,15129311,15130551,15131085,15131297,15132246,15132643,15133029,15135065,15141571,15142136,15144592,15145307,15146048,15147141,15151960,15152814,15153551,15154049,15155703,15157871,15158517,15159221,15163845,15164044,15164690,15165483,15165678,15166436,15166998,15168719,15170539,15171373,15173720,15175198,15176634,15177371,15177640,15180224,15180573,15181333,15185793,15186239,151…	complete_match	ENSMMUG00000008615	15125015	15378176	15124612	15381693	-			protein_coding	protein_coding	ENSMMUP00000011307	XM_001084585	XP_001084585	Uncharacterized protein [Source:UniProtKB/TrEMBL;Acc:F7FCY1]
mmu_circ_021874	chr12_15320164_15320416_R	ciRNA	Yes	chr12	15320164	15320416	-	252	252	1	0	252	ENSMMUT00000012054	chr12:15320137-15320416	0	3	chr12	-	15125014	15378176	ENSMMUT00000012054	130	15125014,15128758,15129164,15130458,15130901,15131189,15132153,15132550,15132936,15134972,15141478,15142043,15144499,15145214,15145943,15147036,15151855,15152700,15153440,15153938,15155598,15157766,15158412,15159110,15163740,15163942,15164579,15165372,15165573,15166331,15166893,15168614,15170431,15171268,15173615,15175093,15176529,15177266,15177535,15180119,15180468,15181228,15185682,15186140,151…	15125185,15128865,15129311,15130551,15131085,15131297,15132246,15132643,15133029,15135065,15141571,15142136,15144592,15145307,15146048,15147141,15151960,15152814,15153551,15154049,15155703,15157871,15158517,15159221,15163845,15164044,15164690,15165483,15165678,15166436,15166998,15168719,15170539,15171373,15173720,15175198,15176634,15177371,15177640,15180224,15180573,15181333,15185793,15186239,151…	complete_match	ENSMMUG00000008615	15125015	15378176	15124612	15381693	-			protein_coding	protein_coding	ENSMMUP00000011307	XM_001084585	XP_001084585	Uncharacterized protein [Source:UniProtKB/TrEMBL;Acc:F7FCY1]
mmu_circ_021877	chr12_15327478_15362606_R	circRNA	Yes	chr12	15327478	15362606	-	4794	35128	27	0,397,3829,5099,5640,5974,7800,8875,11921,13335,14293,14553,15134,15890,17644,19038,20898,22245,24630,25443,27709,28019,29853,30050,30937,32814,34930	204,312,108,105,207,312,108,105,207,312,108,105,207,312,108,105,207,312,108,105,207,312,108,105,99,108,198	ENSMMUT00000012054	chr12:15323505-15327478|chr12:15362606-15365011	0	2	chr12	-	15125014	15378176	ENSMMUT00000012054	130	15125014,15128758,15129164,15130458,15130901,15131189,15132153,15132550,15132936,15134972,15141478,15142043,15144499,15145214,15145943,15147036,15151855,15152700,15153440,15153938,15155598,15157766,15158412,15159110,15163740,15163942,15164579,15165372,15165573,15166331,15166893,15168614,15170431,15171268,15173615,15175093,15176529,15177266,15177535,15180119,15180468,15181228,15185682,15186140,151…	15125185,15128865,15129311,15130551,15131085,15131297,15132246,15132643,15133029,15135065,15141571,15142136,15144592,15145307,15146048,15147141,15151960,15152814,15153551,15154049,15155703,15157871,15158517,15159221,15163845,15164044,15164690,15165483,15165678,15166436,15166998,15168719,15170539,15171373,15173720,15175198,15176634,15177371,15177640,15180224,15180573,15181333,15185793,15186239,151…	complete_match	ENSMMUG00000008615	15125015	15378176	15124612	15381693	-			protein_coding	protein_coding	ENSMMUP00000011307	XM_001084585	XP_001084585	Uncharacterized protein [Source:UniProtKB/TrEMBL;Acc:F7FCY1]
mmu_circ_021880	chr12_15339629_15340813_R	ciRNA	Yes	chr12	15339629	15340813	-	1184	1184	1	0	1184	ENSMMUT00000012054	chr12:15339606-15340813	0	4	chr12	-	15125014	15378176	ENSMMUT00000012054	130	15125014,15128758,15129164,15130458,15130901,15131189,15132153,15132550,15132936,15134972,15141478,15142043,15144499,15145214,15145943,15147036,15151855,15152700,15153440,15153938,15155598,15157766,15158412,15159110,15163740,15163942,15164579,15165372,15165573,15166331,15166893,15168614,15170431,15171268,15173615,15175093,15176529,15177266,15177535,15180119,15180468,15181228,15185682,15186140,151…	15125185,15128865,15129311,15130551,15131085,15131297,15132246,15132643,15133029,15135065,15141571,15142136,15144592,15145307,15146048,15147141,15151960,15152814,15153551,15154049,15155703,15157871,15158517,15159221,15163845,15164044,15164690,15165483,15165678,15166436,15166998,15168719,15170539,15171373,15173720,15175198,15176634,15177371,15177640,15180224,15180573,15181333,15185793,15186239,151…	complete_match	ENSMMUG00000008615	15125015	15378176	15124612	15381693	-			protein_coding	protein_coding	ENSMMUP00000011307	XM_001084585	XP_001084585	Uncharacterized protein [Source:UniProtKB/TrEMBL;Acc:F7FCY1]
mmu_circ_021887	chr12_15375084_15375586_R	circRNA	Yes	chr12	15375084	15375586	-	318	502	3	0,202,397	105,108,105	PREDICTED.56649.8	chr12:15374624-15375084|chr12:15375586-15378056	0	2	chr12	-	15285978	15406324	PREDICTED.56649.8	73	15285978,15287389,15288088,15288338,15289812,15291887,15293638,15294996,15295903,15297075,15298538,15303210,15304441,15304962,15307138,15308319,15316610,15317131,15317630,15319841,15320032,15320416,15321072,15321724,15323400,15327478,15327875,15331307,15332577,15333118,15333452,15335278,15336353,15339399,15340813,15341771,15342031,15342612,15343368,15345122,15346516,15348376,15349723,15352108,153…	15286140,15287701,15288196,15288443,15290016,15292199,15293746,15295101,15296107,15297387,15298646,15303315,15304645,15305274,15307246,15308379,15316662,15317335,15317942,15319949,15320137,15320620,15321384,15321832,15323505,15327682,15328187,15331415,15332682,15333325,15333764,15335386,15336458,15339606,15341125,15341879,15342136,15342819,15343680,15345230,15346621,15348583,15350035,15352216,153…	potentially_novel_isoform
mmu_circ_021894	chr12_15396570_15397042_R	ciRNA	Yes	chr12	15396570	15397042	-	472	472	1	0	472	PREDICTED.56649.8	chr12:15396551-15397042	0	2	chr12	-	15285978	15406324	PREDICTED.56649.8	73	15285978,15287389,15288088,15288338,15289812,15291887,15293638,15294996,15295903,15297075,15298538,15303210,15304441,15304962,15307138,15308319,15316610,15317131,15317630,15319841,15320032,15320416,15321072,15321724,15323400,15327478,15327875,15331307,15332577,15333118,15333452,15335278,15336353,15339399,15340813,15341771,15342031,15342612,15343368,15345122,15346516,15348376,15349723,15352108,153…	15286140,15287701,15288196,15288443,15290016,15292199,15293746,15295101,15296107,15297387,15298646,15303315,15304645,15305274,15307246,15308379,15316662,15317335,15317942,15319949,15320137,15320620,15321384,15321832,15323505,15327682,15328187,15331415,15332682,15333325,15333764,15335386,15336458,15339606,15341125,15341879,15342136,15342819,15343680,15345230,15346621,15348583,15350035,15352216,153…	potentially_novel_isoform
mmu_circ_021895	chr12_15399593_15405030_R	circRNA	Yes	chr12	15399593	15405030	-	323	5437	3	0,1904,5372	216,42,65	PREDICTED.56649.8	chr12:15397150-15399593|chr12:15405030-15405558	0	2	chr12	-	15285978	15406324	PREDICTED.56649.8	73	15285978,15287389,15288088,15288338,15289812,15291887,15293638,15294996,15295903,15297075,15298538,15303210,15304441,15304962,15307138,15308319,15316610,15317131,15317630,15319841,15320032,15320416,15321072,15321724,15323400,15327478,15327875,15331307,15332577,15333118,15333452,15335278,15336353,15339399,15340813,15341771,15342031,15342612,15343368,15345122,15346516,15348376,15349723,15352108,153…	15286140,15287701,15288196,15288443,15290016,15292199,15293746,15295101,15296107,15297387,15298646,15303315,15304645,15305274,15307246,15308379,15316662,15317335,15317942,15319949,15320137,15320620,15321384,15321832,15323505,15327682,15328187,15331415,15332682,15333325,15333764,15335386,15336458,15339606,15341125,15341879,15342136,15342819,15343680,15345230,15346621,15348583,15350035,15352216,153…	potentially_novel_isoform
mmu_circ_021899	chr12_16192733_16232379_F	circRNA	Yes	chr12	16192733	16232379	+	675	39646	7	0,6282,15957,19380,34029,37501,39552	81,77,84,153,109,77,94	PREDICTED.28409.1	chr12:16174405-16192733|chr12:16232379-16258375	0	2	chr12	+	15986721	16300417	PREDICTED.28409.1	28	15986721,16174321,16192733,16199015,16208690,16212113,16226762,16230234,16232285,16258375,16262485,16265782,16268045,16269793,16270403,16276244,16276340,16277476,16279292,16280650,16280821,16282912,16287326,16288427,16290591,16291277,16295943,16298278,	15986854,16174405,16192814,16199092,16208774,16212266,16226871,16230311,16232379,16258450,16262596,16265932,16268147,16270106,16270469,16276286,16276508,16277679,16279527,16280719,16280902,16283042,16287490,16288529,16290690,16291401,16296037,16300417,	potentially_novel_isoform
mmu_circ_021904	chr12_21355532_21365126_R	circRNA	Yes	chr12	21355532	21365126	-	621	9594	3	0,5017,9447	198,276,147	PREDICTED.98529.1	chr12:21332015-21355532|chr12:21365126-21368723	2	0	chr12	-	21329881	21374182	PREDICTED.98529.1	7	21329881,21331884,21355532,21360549,21364979,21368723,21372740,	21331098,21332015,21355730,21360825,21365126,21368823,21374182,	potentially_novel_isoform
mmu_circ_021905	chr12_21360549_21368823_R	circRNA	Yes	chr12	21360549	21368823	-	523	8274	3	0,4430,8174	276,147,100	PREDICTED.98529.1	chr12:21355730-21360549|chr12:21368823-21372740	1	2	chr12	-	21329881	21374182	PREDICTED.98529.1	7	21329881,21331884,21355532,21360549,21364979,21368723,21372740,	21331098,21332015,21355730,21360825,21365126,21368823,21374182,	potentially_novel_isoform
mmu_circ_021907	chr12_22690612_22692028_F	circRNA	Yes	chr12	22690612	22692028	+	318	1416	2	0,1229	131,187	ENSMMUT00000008647	chr12:22677165-22690612|chr12:22692028-22705972	3	0	chr12	+	22607253	22776457	ENSMMUT00000008647	25	22607253,22639787,22677060,22690612,22691841,22705972,22711939,22713204,22714815,22717637,22719025,22721205,22728160,22729513,22737052,22739589,22741972,22760935,22762671,22763431,22768052,22769472,22771610,22772587,22773374,	22607314,22639985,22677165,22690743,22692028,22706236,22712062,22713486,22714967,22717869,22719192,22721813,22728269,22729636,22737289,22739775,22742051,22761069,22762795,22763607,22768185,22769564,22771757,22772688,22776457,	complete_match	ENSMMUG00000006180	22607254	22776457	22607254	22776457	+	TANC1-201	TANC1	protein_coding	protein_coding	ENSMMUP00000008127	XM_001093218	XP_001093218	tetratricopeptide repeat, ankyrin repeat and coiled-coil containing 1 [Source:HGNC Symbol;Acc:HGNC:29364]
mmu_circ_021909	chr12_22797927_22815353_R	circRNA	Yes	chr12	22797927	22815353	-	597	17426	6	0,7448,9011,9194,11083,17332	141,180,107,41,34,94	PREDICTED.98510.3	chr12:22780031-22797927|chr12:22815353-22819080	1	2	chr12	-	22779326	22829731	PREDICTED.98510.3	12	22779326,22779810,22797927,22805375,22806938,22807121,22809010,22815259,22819080,22823328,22825834,22829685,	22779491,22780031,22798068,22805555,22807045,22807162,22809044,22815353,22819173,22823513,22826256,22829731,	potentially_novel_isoform
mmu_circ_021914	chr12_22974638_23000531_R	circRNA	Yes	chr12	22974638	23000531	-	2222	25893	9	0,885,2543,4487,10734,11443,18937,20363,25704	109,61,294,607,396,204,194,168,189	PREDICTED.28633.1	chr12:22974371-22974638|chr12:23000531-23029664	0	2	chr12	-	22860141	23226950	PREDICTED.28633.1	41	22860141,22866094,22866826,22873979,22878373,22879000,22889253,22890584,22890912,22891608,22913742,22915367,22922342,22923434,22923546,22925135,22926332,22929204,22942503,22943815,22944085,22945554,22947333,22951297,22951569,22958878,22974269,22974638,22975523,22977181,22979125,22985372,22986081,22993575,22995001,23000342,23029664,23109703,23171690,23189533,23226868,	22861614,22866238,22867092,22874126,22878509,22879206,22889414,22890740,22891186,22892258,22913887,22915430,22922459,22923496,22923676,22925350,22926587,22929345,22942569,22943842,22944130,22945620,22947399,22951359,22951662,22959089,22974371,22974747,22975584,22977475,22979732,22985768,22986285,22993769,22995169,23000531,23029811,23109746,23172050,23189675,23226950,	potentially_novel_isoform
mmu_circ_021915	chr12_22985372_22993769_R	circRNA	Yes	chr12	22985372	22993769	-	794	8397	3	0,709,8203	396,204,194	PREDICTED.99507.4	chr12:22979732-22985372|chr12:22993769-22995001	2	0	chr12	-	22865322	23171294	PREDICTED.99507.4	37	22865322,22866826,22873979,22878373,22879000,22889253,22890584,22890912,22891608,22913742,22915367,22922342,22923434,22923546,22925135,22926332,22929204,22942503,22943815,22944085,22945554,22947333,22951297,22951569,22958878,22974638,22975523,22977181,22979125,22985372,22986081,22993575,22995001,23000342,23029664,23109703,23170843,	22866238,22867092,22874126,22878509,22879206,22889414,22890740,22891186,22892258,22913887,22915430,22922459,22923496,22923676,22925350,22926587,22929345,22942569,22943842,22944130,22945620,22947399,22951359,22951662,22959089,22974747,22975584,22977475,22979732,22985768,22986285,22993769,22995169,23000531,23029811,23109746,23171294,	potentially_novel_isoform
mmu_circ_021916	chr12_22985372_23000531_R	circRNA	Yes	chr12	22985372	23000531	-	1151	15159	5	0,709,8203,9629,14970	396,204,194,168,189	PREDICTED.99507.4	chr12:22979732-22985372|chr12:23000531-23029664	1	1	chr12	-	22865322	23171294	PREDICTED.99507.4	37	22865322,22866826,22873979,22878373,22879000,22889253,22890584,22890912,22891608,22913742,22915367,22922342,22923434,22923546,22925135,22926332,22929204,22942503,22943815,22944085,22945554,22947333,22951297,22951569,22958878,22974638,22975523,22977181,22979125,22985372,22986081,22993575,22995001,23000342,23029664,23109703,23170843,	22866238,22867092,22874126,22878509,22879206,22889414,22890740,22891186,22892258,22913887,22915430,22922459,22923496,22923676,22925350,22926587,22929345,22942569,22943842,22944130,22945620,22947399,22951359,22951662,22959089,22974747,22975584,22977475,22979732,22985768,22986285,22993769,22995169,23000531,23029811,23109746,23171294,	potentially_novel_isoform
mmu_circ_021917	chr12_23285154_23307833_F	circRNA	Yes	chr12	23285154	23307833	+	1797	22679	5	0,13716,16097,17914,22509	167,193,168,1099,170	PREDICTED.98702.2	chr12:23269246-23285154|chr12:23307833-23314270	2	0	chr12	+	23268952	23319969	PREDICTED.98702.2	9	23268952,23285154,23298870,23301251,23303068,23307663,23314270,23318169,23319904,	23269246,23285321,23299063,23301419,23304167,23307833,23314380,23318283,23319969,	potentially_novel_isoform
mmu_circ_021920	chr12_23303068_23307833_F	circRNA	Yes	chr12	23303068	23307833	+	1269	4765	2	0,4595	1099,170	PREDICTED.98702.2	chr12:23301419-23303068|chr12:23307833-23314270	1	1	chr12	+	23268952	23319969	PREDICTED.98702.2	9	23268952,23285154,23298870,23301251,23303068,23307663,23314270,23318169,23319904,	23269246,23285321,23299063,23301419,23304167,23307833,23314380,23318283,23319969,	potentially_novel_isoform
mmu_circ_021922	chr12_23488468_23520424_R	circRNA	Yes	chr12	23488468	23520424	-	1876	31956	14	0,1334,1946,4141,5873,9658,10167,10990,22071,23793,24680,30590,31225,31823	177,117,141,169,239,148,131,118,140,104,65,158,36,133	PREDICTED.98746.1	chr12:23485679-23488468|chr12:23520424-23522890	3	0	chr12	-	23483083	23583096	PREDICTED.98746.1	29	23483083,23485646,23488468,23489802,23490414,23492609,23494341,23498126,23498635,23499458,23510539,23512261,23513148,23519058,23519693,23520291,23522890,23526910,23530109,23544711,23548394,23552305,23555599,23559088,23561754,23567594,23568244,23572366,23582937,	23485510,23485679,23488645,23489919,23490555,23492778,23494580,23498274,23498766,23499576,23510679,23512365,23513213,23519216,23519729,23520424,23522975,23527056,23530312,23544881,23548412,23552400,23555698,23559246,23561949,23567738,23568358,23572540,23583096,	potentially_novel_isoform
mmu_circ_021929	chr12_28581067_28589635_R	circRNA	Yes	chr12	28581067	28589635	-	388	8568	4	0,2129,7417,8433	80,107,66,135	PREDICTED.100117.1	chr12:28559961-28581067|chr12:28589635-28596615	2	0	chr12	-	28542780	28599709	PREDICTED.100117.1	11	28542780,28552473,28555466,28559088,28559890,28581067,28583196,28588484,28589500,28596615,28599125,	28543399,28552605,28555579,28559250,28559961,28581147,28583303,28588550,28589635,28596690,28599709,	potentially_novel_isoform
mmu_circ_021934	chr12_30087950_30136429_R	circRNA	Yes	chr12	30087950	30136429	-	2410	48479	13	0,1952,5099,14168,16260,17514,20177,33335,38534,41512,41852,46771,48350	155,106,435,357,174,239,97,207,142,70,207,92,129	PREDICTED.100451.1	chr12:30081333-30087950|chr12:30136429-30143951	6	0	chr12	-	30063260	30168106	PREDICTED.100451.1	26	30063260,30068351,30068903,30071223,30071736,30074684,30079069,30080031,30081155,30087950,30089902,30093049,30102118,30104210,30105464,30108127,30121285,30126484,30129462,30129802,30134721,30136300,30143951,30144378,30147626,30167614,	30065294,30068622,30069008,30071361,30071790,30074963,30079155,30080049,30081333,30088105,30090008,30093484,30102475,30104384,30105703,30108224,30121492,30126626,30129532,30130009,30134813,30136429,30144045,30144517,30147871,30168106,	potentially_novel_isoform
mmu_circ_021937	chr12_31763542_31793051_R	circRNA	Yes	chr12	31763542	31793051	-	653	29509	6	0,2185,2548,24012,25835,29400	134,102,110,56,142,109	PREDICTED.101136.1	chr12:31754904-31763542|chr12:31793051-31809408	1	1	chr12	-	31580014	31873854	PREDICTED.101136.1	19	31580014,31591034,31639014,31639892,31643434,31689143,31690956,31700337,31700463,31754690,31754855,31763542,31765727,31766090,31787554,31789377,31792942,31809408,31873442,	31582129,31591099,31639083,31640042,31643487,31689214,31691019,31700367,31700586,31754756,31754904,31763676,31765829,31766200,31787610,31789519,31793051,31809521,31873854,	potentially_novel_isoform
mmu_circ_021938	chr12_31763542_31809521_R	circRNA	Yes	chr12	31763542	31809521	-	766	45979	7	0,2185,2548,24012,25835,29400,45866	134,102,110,56,142,109,113	PREDICTED.101136.1	chr12:31754904-31763542|chr12:31809521-31873442	2	0	chr12	-	31580014	31873854	PREDICTED.101136.1	19	31580014,31591034,31639014,31639892,31643434,31689143,31690956,31700337,31700463,31754690,31754855,31763542,31765727,31766090,31787554,31789377,31792942,31809408,31873442,	31582129,31591099,31639083,31640042,31643487,31689214,31691019,31700367,31700586,31754756,31754904,31763676,31765829,31766200,31787610,31789519,31793051,31809521,31873854,	potentially_novel_isoform
mmu_circ_021942	chr12_33228625_33234062_F	circRNA	Yes	chr12	33228625	33234062	+	446	5437	6	0,388,550,2066,3125,5349	53,77,75,108,45,88	PREDICTED.29291.1	chr12:33209317-33228625|chr12:33234062-33240896	2	0	chr12	+	33209173	33268986	PREDICTED.29291.1	14	33209173,33228625,33229013,33229175,33230691,33231750,33233974,33240896,33241016,33257173,33258156,33261595,33264971,33265291,	33209317,33228678,33229090,33229250,33230799,33231795,33234062,33240926,33241156,33257387,33258324,33261683,33265108,33268986,	potentially_novel_isoform
mmu_circ_021947	chr12_33554452_33565168_F	circRNA	Yes	chr12	33554452	33565168	+	374	10716	4	0,8614,8766,10587	87,66,92,129	PREDICTED.101664.1	chr12:33546571-33554452|chr12:33565168-33566100	2	0	chr12	+	33463160	33566263	PREDICTED.101664.1	16	33463160,33509998,33513830,33515183,33516235,33529302,33534461,33536601,33545223,33546437,33554452,33563066,33563218,33565039,33566100,33566246,	33463670,33510138,33513989,33515327,33516285,33529369,33534592,33536830,33545403,33546571,33554539,33563132,33563310,33565168,33566153,33566263,	potentially_novel_isoform
mmu_circ_021949	chr12_33554452_33572369_F	circRNA	Yes	chr12	33554452	33572369	+	2194	17917	8	0,8614,8768,10587,11648,11794,12284,17820	87,66,90,129,53,134,1538,97	PREDICTED.29738.1	chr12:33546571-33554452|chr12:33572369-33582112	0	2	chr12	+	33463371	33736344	PREDICTED.29738.1	39	33463371,33509998,33513830,33515183,33516235,33529302,33534457,33536601,33545223,33546437,33554452,33563066,33563220,33565039,33566100,33566246,33566736,33572272,33582112,33585901,33587180,33587543,33589238,33598049,33620856,33628517,33635313,33640474,33642271,33648801,33662524,33674465,33689251,33701184,33701426,33719762,33726278,33727008,33728522,	33463670,33510138,33513989,33515327,33516285,33529368,33534592,33536830,33545403,33546571,33554539,33563132,33563310,33565168,33566153,33566380,33568274,33572369,33582254,33586006,33587354,33587576,33589699,33598138,33621006,33628651,33635424,33640675,33642408,33648887,33662627,33674569,33689376,33701292,33701552,33719942,33726488,33727148,33736344,	potentially_novel_isoform
mmu_circ_021950	chr12_33554452_33589699_F	circRNA	Yes	chr12	33554452	33589699	+	3109	35247	13	0,8614,8768,10587,11648,11794,12284,17820,27660,31449,32728,33091,34786	87,66,90,129,53,134,1538,97,142,105,174,33,461	PREDICTED.29738.1	chr12:33546571-33554452|chr12:33589699-33598049	0	2	chr12	+	33463371	33736344	PREDICTED.29738.1	39	33463371,33509998,33513830,33515183,33516235,33529302,33534457,33536601,33545223,33546437,33554452,33563066,33563220,33565039,33566100,33566246,33566736,33572272,33582112,33585901,33587180,33587543,33589238,33598049,33620856,33628517,33635313,33640474,33642271,33648801,33662524,33674465,33689251,33701184,33701426,33719762,33726278,33727008,33728522,	33463670,33510138,33513989,33515327,33516285,33529368,33534592,33536830,33545403,33546571,33554539,33563132,33563310,33565168,33566153,33566380,33568274,33572369,33582254,33586006,33587354,33587576,33589699,33598138,33621006,33628651,33635424,33640675,33642408,33648887,33662627,33674569,33689376,33701292,33701552,33719942,33726488,33727148,33736344,	potentially_novel_isoform
mmu_circ_021951	chr12_33554452_33598138_F	circRNA	Yes	chr12	33554452	33598138	+	3198	43686	14	0,8614,8768,10587,11648,11794,12284,17820,27660,31449,32728,33091,34786,43597	87,66,90,129,53,134,1538,97,142,105,174,33,461,89	PREDICTED.29738.1	chr12:33546571-33554452|chr12:33598138-33620856	0	3	chr12	+	33463371	33736344	PREDICTED.29738.1	39	33463371,33509998,33513830,33515183,33516235,33529302,33534457,33536601,33545223,33546437,33554452,33563066,33563220,33565039,33566100,33566246,33566736,33572272,33582112,33585901,33587180,33587543,33589238,33598049,33620856,33628517,33635313,33640474,33642271,33648801,33662524,33674465,33689251,33701184,33701426,33719762,33726278,33727008,33728522,	33463670,33510138,33513989,33515327,33516285,33529368,33534592,33536830,33545403,33546571,33554539,33563132,33563310,33565168,33566153,33566380,33568274,33572369,33582254,33586006,33587354,33587576,33589699,33598138,33621006,33628651,33635424,33640675,33642408,33648887,33662627,33674569,33689376,33701292,33701552,33719942,33726488,33727148,33736344,	potentially_novel_isoform
mmu_circ_021955	chr12_33585901_33648887_F	circRNA	Yes	chr12	33585901	33648887	+	1426	62986	10	0,1279,3505,12148,34955,42616,49412,54573,56370,62900	105,120,293,89,150,134,111,201,137,86	ENSMMUT00000045169	chr12:33582254-33585901|chr12:33648887-33662524	2	0	chr12	+	33568163	33729154	ENSMMUT00000045169	22	33568163,33572272,33582112,33585901,33587180,33589406,33598049,33620856,33628517,33635313,33640474,33642271,33648801,33662524,33674465,33689251,33701184,33701426,33719762,33726278,33727008,33728522,	33568274,33572369,33582254,33586006,33587300,33589699,33598138,33621006,33628651,33635424,33640675,33642408,33648887,33662627,33674569,33689376,33701292,33701552,33719942,33726488,33727148,33729154,	complete_match	ENSMMUG00000023062	33568164	33729154	33568164	33730928	+	UBR3-201	UBR3	protein_coding	protein_coding	ENSMMUP00000038184			Uncharacterized protein [Source:UniProtKB/TrEMBL;Acc:F7GM61]
mmu_circ_021958	chr12_33620856_33648887_F	circRNA	Yes	chr12	33620856	33648887	+	819	28031	6	0,7661,14457,19618,21415,27945	150,134,111,201,137,86	PREDICTED.29738.1	chr12:33598138-33620856|chr12:33648887-33662524	0	2	chr12	+	33463371	33736344	PREDICTED.29738.1	39	33463371,33509998,33513830,33515183,33516235,33529302,33534457,33536601,33545223,33546437,33554452,33563066,33563220,33565039,33566100,33566246,33566736,33572272,33582112,33585901,33587180,33587543,33589238,33598049,33620856,33628517,33635313,33640474,33642271,33648801,33662524,33674465,33689251,33701184,33701426,33719762,33726278,33727008,33728522,	33463670,33510138,33513989,33515327,33516285,33529368,33534592,33536830,33545403,33546571,33554539,33563132,33563310,33565168,33566153,33566380,33568274,33572369,33582254,33586006,33587354,33587576,33589699,33598138,33621006,33628651,33635424,33640675,33642408,33648887,33662627,33674569,33689376,33701292,33701552,33719942,33726488,33727148,33736344,	potentially_novel_isoform
mmu_circ_021962	chr12_33662524_33689376_F	circRNA	Yes	chr12	33662524	33689376	+	332	26852	3	0,11941,26727	103,104,125	ENSMMUT00000045169	chr12:33648887-33662524|chr12:33689376-33701184	3	0	chr12	+	33568163	33729154	ENSMMUT00000045169	22	33568163,33572272,33582112,33585901,33587180,33589406,33598049,33620856,33628517,33635313,33640474,33642271,33648801,33662524,33674465,33689251,33701184,33701426,33719762,33726278,33727008,33728522,	33568274,33572369,33582254,33586006,33587300,33589699,33598138,33621006,33628651,33635424,33640675,33642408,33648887,33662627,33674569,33689376,33701292,33701552,33719942,33726488,33727148,33729154,	complete_match	ENSMMUG00000023062	33568164	33729154	33568164	33730928	+	UBR3-201	UBR3	protein_coding	protein_coding	ENSMMUP00000038184			Uncharacterized protein [Source:UniProtKB/TrEMBL;Acc:F7GM61]
mmu_circ_021970	chr12_34999786_35001575_R	circRNA	Yes	chr12	34999786	35001575	-	383	1789	2	0,1723	317,66	PREDICTED.101516.1	chr12:34971412-34999786|chr12:35001575-35007356	2	0	chr12	-	34971309	35056996	PREDICTED.101516.1	9	34971309,34999786,35001509,35007356,35008354,35013761,35015699,35037779,35056953,	34971412,35000103,35001575,35007496,35008418,35013811,35016038,35037871,35056996,	potentially_novel_isoform
mmu_circ_021972	chr12_34999786_35016038_R	circRNA	Yes	chr12	34999786	35016038	-	976	16252	6	0,1723,7570,8568,13975,15913	317,66,140,64,50,339	PREDICTED.101516.1	chr12:34971412-34999786|chr12:35016038-35037779	2	0	chr12	-	34971309	35056996	PREDICTED.101516.1	9	34971309,34999786,35001509,35007356,35008354,35013761,35015699,35037779,35056953,	34971412,35000103,35001575,35007496,35008418,35013811,35016038,35037871,35056996,	potentially_novel_isoform
mmu_circ_021974	chr12_35013761_35016038_R	circRNA	Yes	chr12	35013761	35016038	-	389	2277	2	0,1938	50,339	PREDICTED.101516.1	chr12:35008418-35013761|chr12:35016038-35037779	7	0	chr12	-	34971309	35056996	PREDICTED.101516.1	9	34971309,34999786,35001509,35007356,35008354,35013761,35015699,35037779,35056953,	34971412,35000103,35001575,35007496,35008418,35013811,35016038,35037871,35056996,	potentially_novel_isoform
mmu_circ_021976	chr12_35496360_35507471_R	circRNA	Yes	chr12	35496360	35507471	-	259	11111	2	0,10968	116,143	ENSMMUT00000010218	chr12:35484735-35496360|chr12:35507471-35532893	2	1	chr12	-	35419012	35533949	ENSMMUT00000010218	18	35419012,35422117,35422335,35426161,35428311,35444769,35445388,35448514,35450680,35462063,35473735,35474467,35476851,35484595,35496360,35507328,35532893,35533907,	35420120,35422208,35422494,35426300,35428452,35444850,35445441,35448673,35450762,35462148,35473829,35474606,35476998,35484735,35496476,35507471,35532947,35533949,	complete_match	ENSMMUG00000007310	35419013	35533949	35419013	35533949	-	SLC25A12-201	SLC25A12	protein_coding	protein_coding	ENSMMUP00000009586	XM_001085208	XP_001085208	Calcium-binding mitochondrial carrier protein Aralar1; Uncharacterized protein [Source:UniProtKB/TrEMBL;Acc:F7F2U3]
mmu_circ_021977	chr12_35566455_35630092_F	circRNA	Yes	chr12	35566455	35630092	+	1085	63637	9	0,21684,28568,39912,40361,40983,41416,60401,63520	105,76,121,180,122,105,107,152,117	PREDICTED.101713.3	chr12:35563133-35566455|chr12:35630092-35631219	2	0	chr12	+	35563073	35632857	PREDICTED.101713.3	11	35563073,35566455,35588139,35595023,35606367,35606816,35607438,35607871,35626856,35629975,35631219,	35563133,35566560,35588215,35595144,35606547,35606938,35607543,35607978,35627008,35630092,35632857,	complete_match
mmu_circ_021981	chr12_36798068_36835580_F	circRNA	Yes	chr12	36798068	36835580	+	692	37512	8	0,9575,14695,18309,18453,25622,31409,37405	88,102,66,29,138,87,75,107	ENSMMUT00000020571	chr12:36716719-36798068|chr12:36835580-36842589	0	2	chr12	+	36700709	36847987	ENSMMUT00000020571	12	36700709,36716526,36798068,36807643,36812763,36816377,36816521,36823690,36829477,36835473,36842589,36846965,	36700876,36716719,36798156,36807745,36812829,36816406,36816659,36823777,36829552,36835580,36842725,36847987,	complete_match	ENSMMUG00000014672	36700710	36847987	36700589	36895102	+	ZAK-202	ZAK	protein_coding	protein_coding	ENSMMUP00000019249			Mitogen-activated protein kinase kinase kinase MLT isoform 2; Uncharacterized protein [Source:UniProtKB/TrEMBL;Acc:F7FLS9]
mmu_circ_021989	chr12_39603567_39603785_R	circRNA	Yes	chr12	39603567	39603785	-	136	218	2	0,134	52,84	PREDICTED.102674.1	chr12:39581585-39603567|chr12:39603785-39610003	2	0	chr12	-	39558141	39640994	PREDICTED.102674.1	13	39558141,39571079,39572044,39573298,39581372,39603567,39603701,39610003,39619060,39631330,39632275,39634658,39640917,	39563792,39571250,39572115,39573404,39581585,39603619,39603785,39610044,39619119,39631518,39632317,39634747,39640994,	potentially_novel_isoform
mmu_circ_021990	chr12_39603567_39634747_R	circRNA	Yes	chr12	39603567	39634747	-	555	31180	7	0,134,6436,15493,27763,28708,31091	52,84,41,59,188,42,89	PREDICTED.102674.1	chr12:39581585-39603567|chr12:39634747-39640917	8	5	chr12	-	39558141	39640994	PREDICTED.102674.1	13	39558141,39571079,39572044,39573298,39581372,39603567,39603701,39610003,39619060,39631330,39632275,39634658,39640917,	39563792,39571250,39572115,39573404,39581585,39603619,39603785,39610044,39619119,39631518,39632317,39634747,39640994,	potentially_novel_isoform
mmu_circ_021992	chr12_39631330_39634747_R	circRNA	Yes	chr12	39631330	39634747	-	319	3417	3	0,945,3328	188,42,89	PREDICTED.102674.1	chr12:39619119-39631330|chr12:39634747-39640917	2	0	chr12	-	39558141	39640994	PREDICTED.102674.1	13	39558141,39571079,39572044,39573298,39581372,39603567,39603701,39610003,39619060,39631330,39632275,39634658,39640917,	39563792,39571250,39572115,39573404,39581585,39603619,39603785,39610044,39619119,39631518,39632317,39634747,39640994,	potentially_novel_isoform
mmu_circ_021994	chr12_41120819_41129555_F	circRNA	Yes	chr12	41120819	41129555	+	222	8736	3	0,2902,8646	70,62,90	PREDICTED.102940.1	chr12:41115162-41120819|chr12:41129555-41137585	2	0	chr12	+	41001112	41164596	PREDICTED.102940.1	20	41001112,41034061,41050630,41050739,41050954,41054985,41056426,41059540,41075808,41082314,41097602,41108581,41113112,41115049,41120819,41123721,41129465,41137585,41140061,41155869,	41001378,41034176,41050697,41050860,41051029,41055057,41056506,41059621,41075934,41082423,41097730,41108633,41113189,41115162,41120889,41123783,41129555,41137685,41140119,41164596,	complete_match
mmu_circ_021995	chr12_41313365_41345246_R	circRNA	Yes	chr12	41313365	41345246	-	557	31881	5	0,3773,14826,31366,31734	101,91,110,108,147	PREDICTED.103205.2	chr12:41297064-41313365|chr12:41345246-41386170	2	0	chr12	-	41243524	41427074	PREDICTED.103205.2	12	41243524,41279715,41285564,41291550,41296986,41313365,41317138,41328191,41344731,41345099,41386170,41426781,	41245500,41279799,41285632,41291621,41297064,41313466,41317229,41328301,41344839,41345246,41386221,41427074,	potentially_novel_isoform
mmu_circ_021996	chr12_41426781_41455745_R	circRNA	Yes	chr12	41426781	41455745	-	370	28964	4	0,1068,4663,28831	93,68,76,133	PREDICTED.103205.1	chr12:41386221-41426781|chr12:41455745-41499195	3	0	chr12	-	41243524	41521312	PREDICTED.103205.1	17	41243524,41279715,41285564,41291550,41296986,41313365,41317138,41328191,41344731,41345099,41386170,41426781,41427849,41431444,41455612,41499195,41520683,	41245500,41279799,41285632,41291621,41297064,41313466,41317229,41328301,41344839,41345246,41386221,41426874,41427917,41431520,41455745,41499260,41521312,	potentially_novel_isoform
mmu_circ_021999	chr12_41996353_42021510_F	circRNA	Yes	chr12	41996353	42021510	+	438	25157	3	0,10864,25019	166,134,138	PREDICTED.103143.3	chr12:41985764-41996353|chr12:42021510-42029910	1	1	chr12	+	41838134	42042758	PREDICTED.103143.3	21	41838134,41927929,41950024,41970525,41974574,41977846,41979245,41979475,41982946,41985660,41996353,42007217,42021372,42029910,42030499,42032910,42034879,42036841,42038902,42040544,42042531,	41838312,41928124,41950277,41970618,41974697,41977900,41979359,41979646,41983079,41985764,41996519,42007351,42021510,42029998,42031652,42032974,42034958,42036986,42039047,42040671,42042758,	potentially_novel_isoform
mmu_circ_022000	chr12_42179862_42180019_R	circRNA	Yes	chr12	42179862	42180019	-	157	157	1	0	157	PREDICTED.56666.1	chr12:42179138-42179862|chr12:42180019-42180143	0	2	chr12	-	42176477	42289899	PREDICTED.56666.1	138	42176477,42177361,42178191,42178446,42179862,42180143,42185876,42186832,42187237,42188438,42188844,42189280,42189966,42191161,42192427,42192828,42193232,42193999,42194366,42196566,42196995,42197387,42197775,42198178,42198582,42200745,42201161,42202136,42202795,42204668,42205080,42205619,42206031,42208010,42208420,42208815,42209508,42210481,42227699,42228093,42228799,42229187,42229837,42230787,422…	42177224,42177664,42178345,42179138,42180019,42185752,42186470,42187138,42187813,42188738,42189150,42189865,42190269,42191464,42192727,42193116,42193826,42194281,42194672,42196872,42197292,42197678,42198081,42198481,42200649,42201045,42201449,42202430,42204562,42204974,42205383,42205919,42206319,42208307,42208723,42209403,42209805,42227587,42228002,42228681,42229096,42229385,42230620,42231075,422…	potentially_novel_isoform
mmu_circ_022003	chr12_42238158_42238447_R	ciRNA	Yes	chr12	42238158	42238447	-	289	289	1	0	289	PREDICTED.476678.1	chr12:42238137-42238447	2	0	chr12	-	42176477	42302639	PREDICTED.476678.1	157	42176477,42177361,42178191,42178446,42179862,42180143,42185876,42186832,42187237,42188438,42188844,42189280,42189966,42191161,42192427,42192828,42193232,42193999,42194366,42196566,42196995,42197387,42197775,42198178,42198582,42200745,42201161,42202136,42202795,42204668,42205080,42205619,42206031,42208010,42208420,42208815,42209508,42210481,42227699,42228093,42228799,42229187,42229837,42230032,422…	42177224,42177664,42178345,42179138,42180019,42185752,42186470,42187138,42187813,42188738,42189150,42189865,42190269,42191464,42192727,42193116,42193826,42194281,42194672,42196872,42197292,42197678,42198081,42198481,42200649,42201045,42201449,42202430,42204562,42204974,42205383,42205919,42206319,42208307,42208723,42209403,42209805,42227587,42228002,42228681,42229096,42229385,42229942,42230620,422…	potentially_novel_isoform
mmu_circ_022008	chr12_42245684_42249116_R	circRNA	Yes	chr12	42245684	42249116	-	888	3432	3	0,1158,3150	303,303,282	PREDICTED.56666.1	chr12:42245584-42245684|chr12:42249116-42249206	0	2	chr12	-	42176477	42289899	PREDICTED.56666.1	138	42176477,42177361,42178191,42178446,42179862,42180143,42185876,42186832,42187237,42188438,42188844,42189280,42189966,42191161,42192427,42192828,42193232,42193999,42194366,42196566,42196995,42197387,42197775,42198178,42198582,42200745,42201161,42202136,42202795,42204668,42205080,42205619,42206031,42208010,42208420,42208815,42209508,42210481,42227699,42228093,42228799,42229187,42229837,42230787,422…	42177224,42177664,42178345,42179138,42180019,42185752,42186470,42187138,42187813,42188738,42189150,42189865,42190269,42191464,42192727,42193116,42193826,42194281,42194672,42196872,42197292,42197678,42198081,42198481,42200649,42201045,42201449,42202430,42204562,42204974,42205383,42205919,42206319,42208307,42208723,42209403,42209805,42227587,42228002,42228681,42229096,42229385,42230620,42231075,422…	potentially_novel_isoform
mmu_circ_022010	chr12_42249385_42249803_R	ciRNA	Yes	chr12	42249385	42249803	-	418	418	1	0	418	PREDICTED.56666.1	chr12:42249357-42249803	0	2	chr12	-	42176477	42289899	PREDICTED.56666.1	138	42176477,42177361,42178191,42178446,42179862,42180143,42185876,42186832,42187237,42188438,42188844,42189280,42189966,42191161,42192427,42192828,42193232,42193999,42194366,42196566,42196995,42197387,42197775,42198178,42198582,42200745,42201161,42202136,42202795,42204668,42205080,42205619,42206031,42208010,42208420,42208815,42209508,42210481,42227699,42228093,42228799,42229187,42229837,42230787,422…	42177224,42177664,42178345,42179138,42180019,42185752,42186470,42187138,42187813,42188738,42189150,42189865,42190269,42191464,42192727,42193116,42193826,42194281,42194672,42196872,42197292,42197678,42198081,42198481,42200649,42201045,42201449,42202430,42204562,42204974,42205383,42205919,42206319,42208307,42208723,42209403,42209805,42227587,42228002,42228681,42229096,42229385,42230620,42231075,422…	potentially_novel_isoform
mmu_circ_022011	chr12_42252110_42252428_R	circRNA	Yes	chr12	42252110	42252428	-	318	318	1	0	318	PREDICTED.476678.1	chr12:42251148-42252110|chr12:42252428-42252521	2	4	chr12	-	42176477	42302639	PREDICTED.476678.1	157	42176477,42177361,42178191,42178446,42179862,42180143,42185876,42186832,42187237,42188438,42188844,42189280,42189966,42191161,42192427,42192828,42193232,42193999,42194366,42196566,42196995,42197387,42197775,42198178,42198582,42200745,42201161,42202136,42202795,42204668,42205080,42205619,42206031,42208010,42208420,42208815,42209508,42210481,42227699,42228093,42228799,42229187,42229837,42230032,422…	42177224,42177664,42178345,42179138,42180019,42185752,42186470,42187138,42187813,42188738,42189150,42189865,42190269,42191464,42192727,42193116,42193826,42194281,42194672,42196872,42197292,42197678,42198081,42198481,42200649,42201045,42201449,42202430,42204562,42204974,42205383,42205919,42206319,42208307,42208723,42209403,42209805,42227587,42228002,42228681,42229096,42229385,42229942,42230620,422…	potentially_novel_isoform
[truncated: 1,940 more rows]
