# Supplementary material for: Circular RNAs in monkey muscle: age-dependent changes
Source: Aging (Albany NY). 2015 Nov 4;7(11):903–10. doi: 10.18632/aging.100834 (PMC4694061; doi:10.18632/aging.100834)
Supplement: Supplemental Table S3 — CircRNAs showing at least 2 reads in 12 or more (>50%) of the 24 muscle libraries were included in subsequent assessments of circRNAs showing differences in expression among the three age groups (Y, MA, O). [file aging-07-0903-s003.xlsx]

## Sheet: circRNAs used for comparison
circ_ID	circRNA_name	circ_type	50% of samples has 2 reads	circ_chromosome	circ_start	circ_end	circ_strand	circ_length	circ_genomic_length	circ_exon_count	circ_exon_starts	circ_exon_sizes	circ_exon_genomic_start	circ_exon_genomic_end	transcript_name	flanking_intron	S01_age0.005_read_number	S02_age4.06_read_number	S03_age6_read_number	S04_age14.7_read_number	S05_age27_read_number	S06_age13.6_read_number	S07_age0.03_read_number	S08_age13_read_number	S10_age40.1_read_number	S11_age14.4_read_number	S12_age28.7_read_number	S13_age13.5_read_number	S15_age2.8_read_number	S16_age40.9_read_number	S17_age16.93_read_number	S18_age32_read_number	S19_age25.7_read_number	S20_age12.48_read_number	S21_age0.003_read_number	S24_age30.1_read_number	S28_age15.43_read_number	S29_age11.3_read_number	S30_age14.4_read_number	S31_age12_read_number	S21_age0.003_norm_read_number	S01_age0.005_norm_read_number	S07_age0.03_norm_read_number	S15_age2.8_norm_read_number	S02_age4.06_norm_read_number	S03_age6_norm_read_number	S29_age11.3_norm_read_number	S31_age12_norm_read_number	S20_age12.48_norm_read_number
mmu_circ_000145	chr1_112467111_112468281_R	circRNA	Yes	chr1	112467111	112468281	-	190	1170	2	0,1067	87,103	112467111,112468178	112467198,112468281	ENSMMUT00000008148	chr1:112459379-112467111|chr1:112468281-112469341	0	1	4	6	5	0	0	8	0	0	0	2	2	6	8	2	3	4	1	2	1	0	0	3	0.613597	0	0	1.37714	1.55173	3.97234	0	1.20412	2.82115
mmu_circ_000204	chr1_11564080_11579520_R	circRNA	Yes	chr1	11564080	11579520	-	308	15440	3	0,14380,15334	105,97,106	11564080,11578460,11579414	11564185,11578557,11579520	ENSMMUT00000047610	chr1:11529224-11564080|chr1:11579520-11637686	10	0	3	2	4	2	4	5	4	0	0	1	2	3	13	2	4	4	3	3	1	0	0	0	1.84079	10.4496	3.9613	1.37714	0	2.97926	0	0	2.82115
mmu_circ_000392	chr1_130076449_130103478_F	circRNA	Yes	chr1	130076449	130103478	+	838	27029	6	0,17173,19910,21244,21515,26811	232,193,65,105,25,218	130076449,130093622,130096359,130097693,130097964,130103260	130076681,130093815,130096424,130097798,130097989,130103478	PREDICTED.5142.1	chr1:130049972-130076449|chr1:130103478-130123373	2	2	0	2	1	2	3	0	0	0	1	2	2	0	5	5	3	5	2	0	1	0	0	1	1.22719	2.08991	2.97097	1.37714	3.10345	0	0	0.401374	3.52644
mmu_circ_000419	chr1_132448704_132448883_R	ciRNA	Yes	chr1	132448704	132448883	-	179	179	1	0	179	132448704	132448883	ENSMMUT00000007052	chr1:132448682-132448883	2	1	3	2	12	4	6	8	7	1	3	0	5	2	12	2	8	9	0	1	9	0	0	2	0	2.08991	5.94195	3.44284	1.55173	2.97926	0	0.802748	6.34759
mmu_circ_000436	chr1_132759866_132760570_F	circRNA	Yes	chr1	132759866	132760570	+	265	704	2	0,608	169,96	132759866,132760474	132760035,132760570	ENSMMUT00000045894	chr1:132749628-132759866|chr1:132760570-132763264	1	2	0	5	5	0	4	4	3	0	2	4	0	3	10	2	0	0	5	2	6	0	2	2	3.06799	1.04496	3.9613	0	3.10345	0	0	0.802748	0
mmu_circ_000635	chr1_142073777_142074235_R	circRNA	Yes	chr1	142073777	142074235	-	273	458	2	0,261	76,197	142073777,142074038	142073853,142074235	ENSMMUT00000023723	chr1:142067543-142073777|chr1:142074235-142074946	9	11	8	12	8	9	7	21	21	5	7	25	16	29	14	12	17	33	0	0	16	4	12	2	0	9.4046	6.93227	11.0171	17.069	7.94468	1.72226	0.802748	23.2745
mmu_circ_000647	chr1_142094520_142096635_R	circRNA	Yes	chr1	142094520	142096635	-	1062	2115	4	0,567,931,1848	264,264,267,267	142094520,142095087,142095451,142096368	142094784,142095351,142095718,142096635	ENSMMUT00000023723	chr1:142091573-142094520|chr1:142096635-142097054	0	5	6	14	6	0	7	4	1	3	22	3	10	0	3	14	0	4	0	0	4	0	1	3	0	0	6.93227	6.88568	7.75863	5.95851	0	1.20412	2.82115
mmu_circ_000704	chr1_143405314_143409761_R	circRNA	Yes	chr1	143405314	143409761	-	664	4447	3	0,327,4261	67,411,186	143405314,143405641,143409575	143405381,143406052,143409761	ENSMMUT00000012079	chr1:143392918-143405314|chr1:143409761-143428831	7	0	0	5	0	0	3	1	2	3	4	1	6	5	0	0	5	2	2	0	6	1	3	0	1.22719	7.31469	2.97097	4.13141	0	0	0.430566	0	1.41057
mmu_circ_000946	chr1_177355990_177358508_R	circRNA	Yes	chr1	177355990	177358508	-	263	2518	2	0,2356	101,162	177355990,177358346	177356091,177358508	PREDICTED.4522.1	chr1:177342450-177355990|chr1:177358508-177381672	13	1	6	13	8	5	7	22	8	3	3	10	11	0	13	3	9	12	6	2	6	4	0	2	3.68158	13.5844	6.93227	7.57424	1.55173	5.95851	1.72226	0.802748	8.46345
mmu_circ_000970	chr1_18416230_18426664_F	circRNA	Yes	chr1	18416230	18426664	+	384	10434	3	0,5141,10305	127,128,129	18416230,18421371,18426535	18416357,18421499,18426664	PREDICTED.390.2	chr1:18413375-18416230|chr1:18426664-18432781	4	5	4	10	2	2	7	4	5	1	4	3	13	2	20	7	4	11	3	0	4	0	1	2	1.84079	4.17982	6.93227	8.95138	7.75863	3.97234	0	0.802748	7.75816
mmu_circ_001174	chr1_205687437_205691830_R	circRNA	Yes	chr1	205687437	205691830	-	251	4393	2	0,4278	136,115	205687437,205691715	205687573,205691830	ENSMMUT00000044569	chr1:205656184-205687437|chr1:205691830-205720849	5	2	0	1	5	3	11	6	6	2	3	5	5	9	18	4	12	12	4	3	3	1	0	2	2.45439	5.22478	10.8936	3.44284	3.10345	0	0.430566	0.802748	8.46345
mmu_circ_001364	chr1_225997759_226004691_F	circRNA	Yes	chr1	225997759	226004691	+	242	6932	3	0,2944,6861	95,76,71	225997759,226000703,226004620	225997854,226000779,226004691	ENSMMUT00000008242	chr1:225978993-225997759|chr1:226004691-226014215	2	0	0	7	0	0	2	5	3	2	0	0	0	9	2	2	9	2	0	0	0	0	2	0	0	2.08991	1.98065	0	0	0	0	0	1.41057
mmu_circ_001371	chr1_226302990_226304418_R	circRNA	Yes	chr1	226302990	226304418	-	185	1428	2	0,1347	104,81	226302990,226304337	226303094,226304418	ENSMMUT00000008229	chr1:226299001-226302990|chr1:226304418-226306688	4	0	0	4	3	4	5	1	2	0	0	0	3	8	4	0	3	4	1	0	2	1	0	0	0.613597	4.17982	4.95162	2.0657	0	0	0.430566	0	2.82115
mmu_circ_001450	chr1_24464239_24464383_R	ciRNA	Yes	chr1	24464239	24464383	-	144	144	1	0	144	24464239	24464383	ENSMMUT00000047505	chr1:24464207-24464383	11	8	9	18	28	4	21	31	17	0	2	4	3	17	24	7	20	15	4	4	5	1	4	0	2.45439	11.4945	20.7968	2.0657	12.4138	8.93777	0.430566	0	10.5793
mmu_circ_001451	chr1_24464240_24464383_R	ciRNA	Yes	chr1	24464240	24464383	-	143	143	1	0	143	24464240	24464383	ENSMMUT00000047505	chr1:24464207-24464383	20	11	10	10	12	3	29	23	23	0	7	11	7	13	15	6	24	23	8	4	8	0	5	3	4.90878	20.8991	28.7194	4.81997	17.069	9.93085	0	1.20412	16.2216
mmu_circ_001511	chr1_29373853_29376975_F	circRNA	Yes	chr1	29373853	29376975	+	783	3122	3	0,1494,3005	213,453,117	29373853,29375347,29376858	29374066,29375800,29376975	PREDICTED.1967.3	chr1:29341796-29373853|chr1:29376975-29406026	5	7	4	2	0	3	7	2	1	7	5	6	4	2	3	9	7	2	0	0	2	0	0	1	0	5.22478	6.93227	2.75427	10.8621	3.97234	0	0.401374	1.41057
mmu_circ_001525	chr1_30483646_30488022_F	circRNA	Yes	chr1	30483646	30488022	+	170	4376	2	0,4276	70,100	30483646,30487922	30483716,30488022	ENSMMUT00000047443	chr1:30466930-30483646|chr1:30488022-30495899	5	0	0	3	0	0	5	3	2	2	1	0	1	4	4	1	4	2	0	0	3	0	2	0	0	5.22478	4.95162	0.688568	0	0	0	0	1.41057
mmu_circ_001570	chr1_33760378_33763248_R	circRNA	Yes	chr1	33760378	33763248	-	438	2870	2	0,2703	271,167	33760378,33763081	33760649,33763248	ENSMMUT00000047431	chr1:33749362-33760378|chr1:33763248-33773472	6	4	1	2	2	4	3	6	3	0	1	1	9	3	18	5	4	9	4	1	5	2	1	0	2.45439	6.26973	2.97097	6.19711	6.2069	0.993085	0.861132	0	6.34759
mmu_circ_001616	chr1_38167477_38170326_F	circRNA	Yes	chr1	38167477	38170326	+	755	2849	3	0,2262,2678	522,62,171	38167477,38169739,38170155	38167999,38169801,38170326	PREDICTED.2437.1	chr1:38128358-38167477|chr1:38170326-38178191	6	6	0	0	12	9	0	22	0	2	3	7	18	3	24	19	8	12	5	4	0	7	0	4	3.06799	6.26973	0	12.3942	9.31035	0	3.01396	1.6055	8.46345
mmu_circ_001709	chr1_43961735_43966546_R	circRNA	Yes	chr1	43961735	43966546	-	360	4811	2	0,4578	127,233	43961735,43966313	43961862,43966546	ENSMMUT00000047355	chr1:43940688-43961735|chr1:43966546-44027531	7	5	0	7	10	2	7	4	3	6	0	6	16	7	16	12	13	11	3	4	4	0	3	3	1.84079	7.31469	6.93227	11.0171	7.75863	0	0	1.20412	7.75816
mmu_circ_001860	chr1_55650930_55651251_F	circRNA	Yes	chr1	55650930	55651251	+	210	321	2	0,273	162,48	55650930,55651203	55651092,55651251	PREDICTED.1571.2	chr1:55645721-55650930|chr1:55651251-55663625	0	2	0	0	2	2	10	6	3	1	0	2	0	2	5	2	4	1	0	2	1	0	0	0	0	0	9.90325	0	3.10345	0	0	0	0.705287
mmu_circ_002034	chr1_80561412_80562956_R	circRNA	Yes	chr1	80561412	80562956	-	191	1544	2	0,1462	109,82	80561412,80562874	80561521,80562956	ENSMMUT00000025757	chr1:80550450-80561412|chr1:80562956-80564260	7	1	1	2	4	4	0	6	4	1	2	2	5	3	10	4	7	1	5	0	3	0	3	1	3.06799	7.31469	0	3.44284	1.55173	0.993085	0	0.401374	0.705287
mmu_circ_002120	chr1_95320392_95333262_F	circRNA	Yes	chr1	95320392	95333262	+	233	12870	3	0,2971,12801	83,81,69	95320392,95323363,95333193	95320475,95323444,95333262	ENSMMUT00000014093	chr1:95311388-95320392|chr1:95333262-95368779	0	0	3	2	5	1	7	7	5	1	2	0	7	5	9	4	9	0	1	0	2	2	0	0	0.613597	0	6.93227	4.81997	0	2.97926	0.861132	0	0
mmu_circ_002164	chr1_98173777_98183127_F	circRNA	Yes	chr1	98173777	98183127	+	410	9350	4	0,5161,7827,9255	166,90,59,95	98173777,98178938,98181604,98183032	98173943,98179028,98181663,98183127	PREDICTED.1483.1	chr1:98143259-98173777|chr1:98183127-98202713	6	3	5	9	11	5	9	13	7	3	6	3	7	4	49	3	8	15	0	3	19	2	0	5	0	6.26973	8.91292	4.81997	4.65518	4.96543	0.861132	2.00687	10.5793
mmu_circ_002165	chr1_98173777_98202787_F	circRNA	Yes	chr1	98173777	98202787	+	484	29010	5	0,5161,7827,9255,28936	166,90,59,95,74	98173777,98178938,98181604,98183032,98202713	98173943,98179028,98181663,98183127,98202787	PREDICTED.1483.1	chr1:98143259-98173777|chr1:98202787-98220590	0	0	2	14	10	5	0	5	5	5	0	3	6	6	21	5	4	11	0	1	6	3	0	5	0	0	0	4.13141	0	1.98617	1.2917	2.00687	7.75816
mmu_circ_002390	chr10_30146640_30147991_R	circRNA	Yes	chr10	30146640	30147991	-	263	1351	2	0,1226	138,125	30146640,30147866	30146778,30147991	PREDICTED.4187.6	chr10:30138501-30146640|chr10:30147991-30152607	7	3	1	4	4	1	6	3	2	0	0	0	3	3	9	5	6	6	5	0	2	0	0	0	3.06799	7.31469	5.94195	2.0657	4.65518	0.993085	0	0	4.23172
mmu_circ_002444	chr10_36614302_36615617_R	circRNA	Yes	chr10	36614302	36615617	-	236	1315	2	0,1168	89,147	36614302,36615470	36614391,36615617	ENSMMUT00000024562	chr10:36612393-36614302|chr10:36615617-36622537	0	6	2	11	5	3	4	4	3	1	1	3	11	22	15	9	14	5	0	6	1	0	4	0	0	0	3.9613	7.57424	9.31035	1.98617	0	0	3.52644
mmu_circ_002541	chr10_54655595_54658608_F	circRNA	Yes	chr10	54655595	54658608	+	329	3013	3	0,152,2885	69,132,128	54655595,54655747,54658480	54655664,54655879,54658608	ENSMMUT00000015973	chr10:54647899-54655595|chr10:54658608-54673037	0	0	0	5	3	0	7	3	4	2	4	0	1	8	4	0	9	7	4	4	2	1	2	1	2.45439	0	6.93227	0.688568	0	0	0.430566	0.401374	4.93701
mmu_circ_002563	chr10_6079576_6081720_R	circRNA	Yes	chr10	6079576	6081720	-	258	2144	2	0,2063	177,81	6079576,6081639	6079753,6081720	ENSMMUT00000007030	chr10:6076550-6079576|chr10:6081720-6101451	9	2	1	5	3	6	17	14	5	4	3	3	9	9	14	6	13	7	7	2	5	0	0	4	4.29518	9.4046	16.8355	6.19711	3.10345	0.993085	0	1.6055	4.93701
mmu_circ_002784	chr10_85077901_85078416_F	circRNA	Yes	chr10	85077901	85078416	+	325	515	2	0,370	180,145	85077901,85078271	85078081,85078416	ENSMMUT00000001272	chr10:85075851-85077901|chr10:85078416-85080310	2	3	0	3	4	2	6	7	3	0	4	0	6	0	9	7	4	2	3	2	6	1	2	0	1.84079	2.08991	5.94195	4.13141	4.65518	0	0.430566	0	1.41057
mmu_circ_002956	chr11_110177698_110181788_F	circRNA	Yes	chr11	110177698	110181788	+	272	4090	2	0,3951	133,139	110177698,110181649	110177831,110181788	PREDICTED.10066.2	chr11:110149097-110177698|chr11:110181788-110185639	2	0	2	6	6	2	2	2	5	0	0	0	3	5	15	2	17	4	3	1	3	0	0	0	1.84079	2.08991	1.98065	2.0657	0	1.98617	0	0	2.82115
mmu_circ_002957	chr11_110177698_110185749_F	circRNA	Yes	chr11	110177698	110185749	+	382	8051	3	0,3951,7941	133,139,110	110177698,110181649,110185639	110177831,110181788,110185749	PREDICTED.10066.2	chr11:110149097-110177698|chr11:110185749-110186104	8	1	0	11	6	2	16	12	5	4	0	0	7	8	16	4	18	6	0	0	9	0	0	0	0	8.35964	15.8452	4.81997	1.55173	0	0	0	4.23172
mmu_circ_003126	chr11_121588694_121589095_F	circRNA	Yes	chr11	121588694	121589095	+	322	401	2	0,264	185,137	121588694,121588958	121588879,121589095	ENSMMUT00000045498	chr11:121586383-121588694|chr11:121589095-121592688	6	2	1	6	2	1	7	3	1	1	1	1	5	0	9	2	8	4	1	0	5	0	3	1	0.613597	6.26973	6.93227	3.44284	3.10345	0.993085	0	0.401374	2.82115
mmu_circ_003134	chr11_121824431_121826396_R	circRNA	Yes	chr11	121824431	121826396	-	312	1965	3	0,1028,1845	113,79,120	121824431,121825459,121826276	121824544,121825538,121826396	ENSMMUT00000029047	chr11:121809645-121824431|chr11:121826396-121833063	8	0	1	3	7	2	6	4	0	0	0	0	3	2	9	3	2	3	0	0	4	0	0	1	0	8.35964	5.94195	2.0657	0	0.993085	0	0.401374	2.11586
mmu_circ_003171	chr11_123583560_123584505_R	circRNA	Yes	chr11	123583560	123584505	-	945	945	1	0	945	123583560	123584505	ENSMMUT00000030851	chr11:123579310-123583560|chr11:123584505-123589819	2	0	2	1	8	1	3	15	3	4	0	5	16	0	17	5	4	4	0	3	7	3	0	0	0	2.08991	2.97097	11.0171	0	1.98617	1.2917	0	2.82115
mmu_circ_003216	chr11_124782323_124783316_R	circRNA	Yes	chr11	124782323	124783316	-	341	993	2	0,874	222,119	124782323,124783197	124782545,124783316	ENSMMUT00000045406	chr11:124768326-124782323|chr11:124783316-124804868	4	0	0	12	13	0	5	2	0	0	0	2	4	0	11	6	4	5	0	0	3	1	0	0	0	4.17982	4.95162	2.75427	0	0	0.430566	0	3.52644
mmu_circ_003234	chr11_12601545_12601939_R	circRNA	Yes	chr11	12601545	12601939	-	394	394	1	0	394	12601545	12601939	PREDICTED.9079.4	chr11:12556597-12601545|chr11:12601939-12623399	1	3	2	12	0	7	3	4	0	2	0	2	5	1	5	0	1	5	0	0	0	2	1	0	0	1.04496	2.97097	3.44284	4.65518	1.98617	0.861132	0	3.52644
mmu_circ_003308	chr11_22188393_22201342_R	circRNA	Yes	chr11	22188393	22201342	-	354	12949	3	0,8597,12791	103,93,158	22188393,22196990,22201184	22188496,22197083,22201342	PREDICTED.13846.3	chr11:22177490-22188393|chr11:22201342-22204783	11	5	6	17	9	7	35	17	5	0	7	15	31	14	23	10	19	16	10	5	13	0	2	1	6.13597	11.4945	34.6614	21.3456	7.75863	5.95851	0	0.401374	11.2846
mmu_circ_003415	chr11_31488273_31508698_R	circRNA	Yes	chr11	31488273	31508698	-	675	20425	7	0,1920,1939,11132,12074,13829,20331	130,5,82,79,153,132,94	31488273,31490193,31490212,31499405,31500347,31502102,31508604	31488403,31490198,31490294,31499484,31500500,31502234,31508698	ENSMMUT00000004564	chr11:31488220-31488273|chr11:31508698-31519263	2	2	0	0	1	2	0	3	1	4	2	1	2	0	4	3	3	5	0	1	1	0	0	2	0	2.08991	0	1.37714	3.10345	0	0	0.802748	3.52644
mmu_circ_003430	chr11_31569973_31573907_R	circRNA	Yes	chr11	31569973	31573907	-	176	3934	2	0,3868	110,66	31569973,31573841	31570083,31573907	PREDICTED.8905.1	chr11:31553610-31569973|chr11:31573907-31595212	2	5	2	5	7	1	4	9	6	0	0	0	7	12	11	2	14	7	3	0	0	1	0	0	1.84079	2.08991	3.9613	4.81997	7.75863	1.98617	0.430566	0	4.93701
mmu_circ_003505	chr11_42861701_42864442_F	circRNA	Yes	chr11	42861701	42864442	+	793	2741	5	0,157,740,917,2573	67,251,97,210,168	42861701,42861858,42862441,42862618,42864274	42861768,42862109,42862538,42862828,42864442	ENSMMUT00000022445	chr11:42846747-42861701|chr11:42864442-42871537	5	0	2	4	2	3	0	4	0	0	2	2	7	0	4	1	0	0	0	0	3	0	0	2	0	5.22478	0	4.81997	0	1.98617	0	0.802748	0
mmu_circ_003605	chr11_47935730_47966058_F	circRNA	Yes	chr11	47935730	47966058	+	331	30328	3	0,16480,30197	99,101,131	47935730,47952210,47965927	47935829,47952311,47966058	ENSMMUT00000016937	chr11:47917220-47935730|chr11:47966058-47970423	3	1	6	0	1	1	8	6	3	3	0	5	6	4	9	5	2	8	4	0	6	0	2	0	2.45439	3.13487	7.9226	4.13141	1.55173	5.95851	0	0	5.6423
mmu_circ_003606	chr11_47935730_47970854_F	circRNA	Yes	chr11	47935730	47970854	+	674	35124	5	0,16480,30197,34693,34964	99,101,131,183,160	47935730,47952210,47965927,47970423,47970694	47935829,47952311,47966058,47970606,47970854	ENSMMUT00000016937	chr11:47917220-47935730|chr11:47970854-47976248	9	5	2	2	0	2	4	0	7	2	0	2	6	0	8	4	2	6	0	0	6	4	0	1	0	9.4046	3.9613	4.13141	7.75863	1.98617	1.72226	0.401374	4.23172
mmu_circ_003691	chr11_53750176_53753595_R	circRNA	Yes	chr11	53750176	53753595	-	373	3419	4	0,1497,3098,3305	90,99,70,114	53750176,53751673,53753274,53753481	53750266,53751772,53753344,53753595	ENSMMUT00000019329	chr11:53745889-53750176|chr11:53753595-53768791	8	1	3	5	2	3	5	3	2	2	0	4	2	2	12	1	7	3	4	1	4	0	0	0	2.45439	8.35964	4.95162	1.37714	1.55173	2.97926	0	0	2.11586
mmu_circ_003696	chr11_54132011_54136037_R	circRNA	Yes	chr11	54132011	54136037	-	418	4026	3	0,1444,3901	73,220,125	54132011,54133455,54135912	54132084,54133675,54136037	ENSMMUT00000027808	chr11:54128123-54132011|chr11:54136037-54143314	8	0	0	4	8	0	11	2	3	1	0	0	0	4	1	2	8	1	7	0	3	0	4	1	4.29518	8.35964	10.8936	0	0	0	0	0.401374	0.705287
mmu_circ_003723	chr11_55045846_55050896_F	circRNA	Yes	chr11	55045846	55050896	+	304	5050	3	0,3153,4966	82,138,84	55045846,55048999,55050812	55045928,55049137,55050896	ENSMMUT00000026995	chr11:55044827-55045846|chr11:55050896-55054333	22	1	2	14	5	5	32	8	1	2	2	0	7	7	5	8	18	8	12	0	2	0	0	0	7.36317	22.989	31.6904	4.81997	1.55173	1.98617	0	0	5.6423
mmu_circ_003825	chr11_7050778_7050911_F	circRNA	Yes	chr11	7050778	7050911	+	133	133	1	0	133	7050778	7050911	ENSMMUT00000047288	chr11:7050704-7050778|chr11:7050911-7051211	1	2	1	4	5	2	2	3	3	0	1	6	15	1	7	2	5	3	0	1	2	0	0	0	0	1.04496	1.98065	10.3285	3.10345	0.993085	0	0	2.11586
mmu_circ_004044	chr12_11444149_11447805_F	circRNA	Yes	chr12	11444149	11447805	+	473	3656	3	0,3201,3501	208,110,155	11444149,11447350,11447650	11444357,11447460,11447805	ENSMMUT00000000059	chr12:11392488-11444149|chr12:11447805-11463077	9	3	1	9	5	2	16	12	4	4	0	0	6	2	14	0	4	0	4	0	3	3	1	0	2.45439	9.4046	15.8452	4.13141	4.65518	0.993085	1.2917	0	0
mmu_circ_004183	chr12_16321999_16323148_R	circRNA	Yes	chr12	16321999	16323148	-	260	1149	2	0,1040	151,109	16321999,16323039	16322150,16323148	ENSMMUT00000045316	chr12:16321053-16321999|chr12:16323148-16324216	9	6	3	3	7	0	11	8	2	1	2	4	5	7	7	0	0	2	3	0	4	0	2	1	1.84079	9.4046	10.8936	3.44284	9.31035	2.97926	0	0.401374	1.41057
mmu_circ_004191	chr12_20107255_20124819_F	circRNA	Yes	chr12	20107255	20124819	+	559	17564	4	0,14831,16280,17400	172,125,98,164	20107255,20122086,20123535,20124655	20107427,20122211,20123633,20124819	ENSMMUT00000006917	chr12:20087083-20107255|chr12:20124819-20158387	3	2	4	3	5	2	2	4	1	0	0	2	2	1	14	4	4	7	0	1	6	2	0	2	0	3.13487	1.98065	1.37714	3.10345	3.97234	0.861132	0.802748	4.93701
mmu_circ_004242	chr12_23567594_23572540_R	circRNA	Yes	chr12	23567594	23572540	-	432	4946	3	0,650,4772	144,114,174	23567594,23568244,23572366	23567738,23568358,23572540	ENSMMUT00000029149	chr12:23561949-23567594|chr12:23572540-23582937	6	1	2	3	6	0	5	11	6	3	0	5	10	0	5	3	3	6	0	0	7	0	0	0	0	6.26973	4.95162	6.88568	1.55173	1.98617	0	0	4.23172
mmu_circ_004374	chr12_37576656_37578016_R	circRNA	Yes	chr12	37576656	37578016	-	1360	1360	1	0	1360	37576656	37578016	ENSMMUT00000030702	chr12:37542296-37576656|chr12:37578016-37586131	0	2	3	9	7	0	0	1	6	1	2	3	9	3	10	10	2	3	5	1	0	0	0	0	3.06799	0	0	6.19711	3.10345	2.97926	0	0	2.11586
mmu_circ_004651	chr12_43582359_43582775_R	circRNA	Yes	chr12	43582359	43582775	-	323	416	2	0,314	221,102	43582359,43582673	43582580,43582775	ENSMMUT00000029039	chr12:43577150-43582359|chr12:43582775-43584290	10	6	10	27	10	7	8	14	10	3	9	19	22	4	34	12	16	15	0	3	2	3	2	4	0	10.4496	7.9226	15.1485	9.31035	9.93085	1.2917	1.6055	10.5793
mmu_circ_004699	chr12_60416488_60417357_R	circRNA	Yes	chr12	60416488	60417357	-	358	869	2	0,677	166,192	60416488,60417165	60416654,60417357	ENSMMUT00000012085	chr12:60413187-60416488|chr12:60417357-60418945	1	1	0	1	3	2	8	4	1	0	1	3	3	2	7	3	7	0	0	1	3	2	0	0	0	1.04496	7.9226	2.0657	1.55173	0	0.861132	0	0
mmu_circ_004759	chr12_66324640_66327107_F	circRNA	Yes	chr12	66324640	66327107	+	342	2467	2	0,2296	171,171	66324640,66326936	66324811,66327107	PREDICTED.12232.1	chr12:66215718-66324640|chr12:66327107-66375674	9	1	1	4	3	0	15	6	2	0	0	4	4	13	7	7	12	6	2	4	4	0	0	0	1.22719	9.4046	14.8549	2.75427	1.55173	0.993085	0	0	4.23172
mmu_circ_004916	chr12_83327621_83328165_F	ciRNA	Yes	chr12	83327621	83328165	+	544	544	1	0	544	83327621	83328165	ENSMMUT00000025201	chr12:83327621-83328194	8	1	6	19	1	4	15	9	3	1	0	16	11	18	8	24	18	13	0	11	13	0	0	1	0	8.35964	14.8549	7.57424	1.55173	5.95851	0	0.401374	9.16873
mmu_circ_004932	chr12_86464617_86507773_R	circRNA	Yes	chr12	86464617	86507773	-	1503	43156	14	0,12676,18392,22684,23302,23743,28899,30177,30339,35074,35201,40128,40252,43001	156,118,93,81,208,62,52,62,82,34,208,119,73,155	86464617,86477293,86483009,86487301,86487919,86488360,86493516,86494794,86494956,86499691,86499818,86504745,86504869,86507618	86464773,86477411,86483102,86487382,86488127,86488422,86493568,86494856,86495038,86499725,86500026,86504864,86504942,86507773	PREDICTED.12021.2	chr12:86437585-86464617|chr12:86507773-86511274	7	0	4	8	0	5	6	10	2	0	1	2	0	2	7	7	2	11	5	0	3	3	0	3	3.06799	7.31469	5.94195	0	0	3.97234	1.2917	1.20412	7.75816
mmu_circ_005249	chr13_133513557_133515288_R	circRNA	Yes	chr13	133513557	133515288	-	354	1731	4	0,910,1467,1676	108,96,95,55	133513557,133514467,133515024,133515233	133513665,133514563,133515119,133515288	PREDICTED.15130.1	chr13:133508626-133513557|chr13:133515288-133521235	10	8	5	0	5	4	7	16	13	3	0	8	13	6	31	16	15	13	7	3	15	7	0	4	4.29518	10.4496	6.93227	8.95138	12.4138	4.96543	3.01396	1.6055	9.16873
mmu_circ_005432	chr13_31955804_31970345_R	circRNA	Yes	chr13	31955804	31970345	-	294	14541	3	0,2749,14472	112,113,69	31955804,31958553,31970276	31955916,31958666,31970345	ENSMMUT00000043639	chr13:31928880-31955804|chr13:31970345-31981960	8	0	0	5	2	4	4	4	0	0	0	0	5	11	20	2	6	0	0	0	3	0	0	2	0	8.35964	3.9613	3.44284	0	0	0	0.802748	0
mmu_circ_005671	chr13_54206823_54213750_R	circRNA	Yes	chr13	54206823	54213750	-	669	6927	4	0,3986,4881,6804	187,266,93,123	54206823,54210809,54211704,54213627	54207010,54211075,54211797,54213750	PREDICTED.14828.1	chr13:54206197-54206823|chr13:54213750-54215096	8	3	0	2	4	0	9	0	4	0	1	4	3	1	11	6	0	4	4	0	3	0	0	1	2.45439	8.35964	8.91292	2.0657	4.65518	0	0	0.401374	2.82115
mmu_circ_005699	chr13_58437748_58447822_R	circRNA	Yes	chr13	58437748	58447822	-	278	10074	4	0,4671,7784,10015	101,57,61,59	58437748,58442419,58445532,58447763	58437849,58442476,58445593,58447822	ENSMMUT00000002867	chr13:58417688-58437748|chr13:58447822-58456817	24	0	0	16	7	4	41	7	22	0	0	0	14	17	0	0	18	15	0	0	4	0	7	5	0	25.0789	40.6033	9.63995	0	0	0	2.00687	10.5793
mmu_circ_005764	chr13_61731535_61743299_R	circRNA	Yes	chr13	61731535	61743299	-	307	11764	3	0,3749,11632	73,102,132	61731535,61735284,61743167	61731608,61735386,61743299	ENSMMUT00000043531	chr13:61713773-61731535|chr13:61743299-61746942	0	3	3	0	2	0	10	0	0	0	3	0	11	3	16	0	7	9	4	0	5	0	0	0	2.45439	0	9.90325	7.57424	4.65518	2.97926	0	0	6.34759
mmu_circ_005869	chr13_72987366_73002997_R	circRNA	Yes	chr13	72987366	73002997	-	390	15631	4	0,13500,13645,15583	205,46,91,48	72987366,73000866,73001011,73002949	72987571,73000912,73001102,73002997	PREDICTED.15303.2	chr13:72851258-72987366|chr13:73002997-73010936	21	0	3	10	0	0	21	9	7	4	4	3	14	11	31	14	16	5	0	0	8	0	0	0	0	21.9441	20.7968	9.63995	0	2.97926	0	0	3.52644
mmu_circ_006028	chr14_105577271_105585481_R	circRNA	Yes	chr14	105577271	105585481	-	184	8210	2	0,8148	122,62	105577271,105585419	105577393,105585481	ENSMMUT00000018821	chr14:105538912-105577271|chr14:105585481-105615951	11	5	1	3	8	2	31	10	4	3	3	13	8	47	18	0	17	3	9	0	7	2	0	3	5.52238	11.4945	30.7001	5.50854	7.75863	0.993085	0.861132	1.20412	2.11586
mmu_circ_006196	chr14_117183235_117183702_R	circRNA	Yes	chr14	117183235	117183702	-	467	467	1	0	467	117183235	117183702	PREDICTED.18271.1	chr14:117178173-117183235|chr14:117183702-117188958	14	2	3	4	0	4	19	2	4	1	3	2	8	4	11	2	4	14	10	1	3	0	0	0	6.13597	14.6294	18.8162	5.50854	3.10345	2.97926	0	0	9.87402
mmu_circ_006235	chr14_119447082_119449067_F	circRNA	Yes	chr14	119447082	119449067	+	290	1985	2	0,1845	150,140	119447082,119448927	119447232,119449067	ENSMMUT00000000125	chr14:119425654-119447082|chr14:119449067-119454940	7	0	0	3	0	2	1	9	2	0	0	2	4	4	2	4	9	3	1	0	2	0	0	1	0.613597	7.31469	0.990325	2.75427	0	0	0	0.401374	2.11586
mmu_circ_006278	chr14_128172492_128173744_F	circRNA	Yes	chr14	128172492	128173744	+	298	1252	2	0,1128	174,124	128172492,128173620	128172666,128173744	ENSMMUT00000025328	None|chr14:128173744-128184200	6	2	2	0	1	1	0	0	0	1	3	2	0	2	8	6	10	3	6	3	6	1	0	2	3.68158	6.26973	0	0	3.10345	1.98617	0.430566	0.802748	2.11586
mmu_circ_006322	chr14_1750828_1750927_F	ciRNA	Yes	chr14	1750828	1750927	+	99	99	1	0	99	1750828	1750927	ENSMMUT00000006832	chr14:1750828-1750949	1	0	2	8	14	0	0	9	3	2	6	2	15	1	18	2	6	5	1	4	5	1	2	3	0.613597	1.04496	0	10.3285	0	1.98617	0.430566	1.20412	3.52644
mmu_circ_006344	chr14_24630194_24631266_F	circRNA	Yes	chr14	24630194	24631266	+	215	1072	2	0,992	135,80	24630194,24631186	24630329,24631266	ENSMMUT00000044149	chr14:24627604-24630194|chr14:24631266-24631851	3	0	3	3	0	2	2	6	0	0	0	2	1	0	3	0	6	2	0	0	3	0	0	2	0	3.13487	1.98065	0.688568	0	2.97926	0	0.802748	1.41057
mmu_circ_006452	chr14_38712203_38712717_F	circRNA	Yes	chr14	38712203	38712717	+	229	514	3	0,148,387	67,35,127	38712203,38712351,38712590	38712270,38712386,38712717	ENSMMUT00000003621	chr14:38710321-38712203|chr14:38712717-38715093	14	3	4	16	13	3	17	11	8	7	0	7	10	14	26	2	13	14	7	2	7	2	0	0	4.29518	14.6294	16.8355	6.88568	4.65518	3.97234	0.861132	0	9.87402
mmu_circ_006547	chr14_55587402_55609770_F	circRNA	Yes	chr14	55587402	55609770	+	449	22368	2	0,22160	241,208	55587402,55609562	55587643,55609770	PREDICTED.17617.3	chr14:55525273-55587402|chr14:55609770-55697978	5	4	3	8	0	2	5	0	5	1	0	2	7	0	0	2	4	0	1	0	6	0	0	0	0.613597	5.22478	4.95162	4.81997	6.2069	2.97926	0	0	0
mmu_circ_006575	chr14_57630462_57631853_F	circRNA	Yes	chr14	57630462	57631853	+	300	1391	3	0,995,1282	88,103,109	57630462,57631457,57631744	57630550,57631560,57631853	PREDICTED.16811.1	chr14:57567504-57630462|chr14:57631853-57643550	7	0	5	9	5	0	7	5	4	3	7	4	10	13	24	6	23	12	10	2	5	2	0	0	6.13597	7.31469	6.93227	6.88568	0	4.96543	0.861132	0	8.46345
mmu_circ_006582	chr14_58473416_58481042_F	circRNA	Yes	chr14	58473416	58481042	+	707	7626	4	0,2038,4456,7505	197,286,103,121	58473416,58475454,58477872,58480921	58473613,58475740,58477975,58481042	ENSMMUT00000013537	chr14:58450171-58473416|chr14:58481042-58489578	4	3	1	3	2	2	5	5	4	3	2	0	4	0	11	5	3	5	4	0	4	1	1	1	2.45439	4.17982	4.95162	2.75427	4.65518	0.993085	0.430566	0.401374	3.52644
mmu_circ_006895	chr14_84328521_84334852_R	circRNA	Yes	chr14	84328521	84334852	-	451	6331	4	0,3536,3920,6245	104,137,124,86	84328521,84332057,84332441,84334766	84328625,84332194,84332565,84334852	ENSMMUT00000027549	chr14:84322053-84328521|chr14:84334852-84338926	9	3	2	0	3	0	6	2	3	2	3	0	0	2	6	6	6	3	3	0	4	0	0	0	1.84079	9.4046	5.94195	0	4.65518	1.98617	0	0	2.11586
mmu_circ_006911	chr14_84353726_84362875_R	circRNA	Yes	chr14	84353726	84362875	-	322	9149	3	0,3872,9006	103,76,143	84353726,84357598,84362732	84353829,84357674,84362875	ENSMMUT00000027549	chr14:84346175-84353726|chr14:84362875-84400591	7	2	0	2	2	0	6	4	3	3	1	1	3	5	8	4	5	4	3	1	2	1	0	1	1.84079	7.31469	5.94195	2.0657	3.10345	0	0.430566	0.401374	2.82115
mmu_circ_006990	chr14_9702545_9702752_F	ciRNA	Yes	chr14	9702545	9702752	+	207	207	1	0	207	9702545	9702752	ENSMMUT00000031809	chr14:9702545-9702773	1	1	4	21	5	4	4	42	10	1	3	10	33	0	22	4	3	15	1	0	10	3	14	5	0.613597	1.04496	3.9613	22.7227	1.55173	3.97234	1.2917	2.00687	10.5793
mmu_circ_007062	chr15_105230911_105236113_F	circRNA	Yes	chr15	105230911	105236113	+	330	5202	2	0,5119	247,83	105230911,105236030	105231158,105236113	ENSMMUT00000045721	chr15:105212160-105230911|chr15:105236113-105258164	18	7	4	0	0	3	27	16	0	0	0	2	12	17	29	4	26	9	8	3	12	1	3	0	4.90878	18.8092	26.7388	8.26281	10.8621	3.97234	0.430566	0	6.34759
mmu_circ_007064	chr15_105230911_105259565_F	circRNA	Yes	chr15	105230911	105259565	+	556	28654	4	0,5119,27253,28557	247,83,129,97	105230911,105236030,105258164,105259468	105231158,105236113,105258293,105259565	ENSMMUT00000045721	chr15:105212160-105230911|chr15:105259565-105276747	15	0	1	0	0	0	8	3	0	0	3	4	5	5	3	3	13	3	3	0	0	2	0	0	1.84079	15.6743	7.9226	3.44284	0	0.993085	0.861132	0	2.11586
mmu_circ_007121	chr15_11988702_12000406_F	circRNA	Yes	chr15	11988702	12000406	+	170	11704	2	0,11584	50,120	11988702,12000286	11988752,12000406	ENSMMUT00000008908	chr15:11965468-11988702|chr15:12000406-12080318	9	5	3	7	7	5	7	10	9	5	3	7	8	8	22	3	20	10	0	0	7	2	10	0	0	9.4046	6.93227	5.50854	7.75863	2.97926	0.861132	0	7.05287
mmu_circ_007371	chr15_36259766_36260004_R	circRNA	Yes	chr15	36259766	36260004	-	167	238	2	0,122	51,116	36259766,36259888	36259817,36260004	PREDICTED.19374.1	chr15:36252365-36259766|chr15:36260004-36268074	8	1	5	8	3	0	7	0	5	6	0	6	10	11	15	7	12	4	2	4	1	4	0	0	1.22719	8.35964	6.93227	6.88568	1.55173	4.96543	1.72226	0	2.82115
mmu_circ_007426	chr15_41837367_41837518_F	ciRNA	Yes	chr15	41837367	41837518	+	151	151	1	0	151	41837367	41837518	ENSMMUT00000022923	chr15:41837367-41837539	7	5	6	35	15	6	5	51	7	4	1	4	4	16	8	4	11	20	5	0	12	5	8	4	3.06799	7.31469	4.95162	2.75427	7.75863	5.95851	2.15283	1.6055	14.1057
mmu_circ_007427	chr15_41837367_41837519_F	ciRNA	Yes	chr15	41837367	41837519	+	152	152	1	0	152	41837367	41837519	ENSMMUT00000022923	chr15:41837367-41837539	10	8	10	32	22	5	2	52	8	6	2	11	9	16	6	7	5	15	0	4	12	3	17	5	0	10.4496	1.98065	6.19711	12.4138	9.93085	1.2917	2.00687	10.5793
mmu_circ_007501	chr15_50215198_50243797_F	circRNA	Yes	chr15	50215198	50243797	+	436	28599	4	0,1302,2597,28525	201,85,76,74	50215198,50216500,50217795,50243723	50215399,50216585,50217871,50243797	ENSMMUT00000008491	chr15:50210652-50215198|chr15:50243797-50261429	10	2	1	0	0	0	10	7	1	0	0	2	4	5	2	4	3	3	4	0	0	0	0	0	2.45439	10.4496	9.90325	2.75427	3.10345	0.993085	0	0	2.11586
mmu_circ_007566	chr15_60489615_60491585_F	circRNA	Yes	chr15	60489615	60491585	+	1970	1970	1	0	1970	60489615	60491585	ENSMMUT00000046222	chr15:60378189-60489615|chr15:60491585-60497130	6	9	9	17	20	1	0	9	5	15	8	16	0	1	19	41	10	9	0	7	8	2	0	8	0	6.26973	0	0	13.9655	8.93777	0.861132	3.21099	6.34759
mmu_circ_007854	chr16_10271887_10272943_R	ciRNA	Yes	chr16	10271887	10272943	-	1056	1056	1	0	1056	10271887	10272943	ENSMMUT00000013651	chr16:10271863-10272943	1	5	11	3	3	5	3	25	4	0	0	4	5	0	15	1	0	10	3	0	4	2	0	2	1.84079	1.04496	2.97097	3.44284	7.75863	10.9239	0.861132	0.802748	7.05287
mmu_circ_007931	chr16_16461818_16466480_R	circRNA	Yes	chr16	16461818	16466480	-	364	4662	5	0,2311,2687,3745,4551	95,62,57,39,111	16461818,16464129,16464505,16465563,16466369	16461913,16464191,16464562,16465602,16466480	ENSMMUT00000042166	chr16:16441895-16461818|chr16:16466480-16468122	11	3	0	6	8	3	8	17	0	2	5	2	14	2	7	6	10	10	6	0	7	4	0	0	3.68158	11.4945	7.9226	9.63995	4.65518	0	1.72226	0	7.05287
mmu_circ_007947	chr16_1831586_1831712_F	ciRNA	Yes	chr16	1831586	1831712	+	126	126	1	0	126	1831586	1831712	ENSMMUT00000031194	chr16:1831586-1831734	1	1	5	7	4	0	4	4	3	1	0	5	4	2	3	0	5	12	0	0	1	0	7	2	0	1.04496	3.9613	2.75427	1.55173	4.96543	0	0.802748	8.46345
mmu_circ_008023	chr16_2467056_2468879_F	circRNA	Yes	chr16	2467056	2468879	+	367	1823	3	0,644,1616	85,75,207	2467056,2467700,2468672	2467141,2467775,2468879	ENSMMUT00000028885	chr16:2437594-2467056|chr16:2468879-2477524	9	0	0	0	3	0	3	2	2	0	1	2	3	2	6	3	4	3	5	0	3	1	0	0	3.06799	9.4046	2.97097	2.0657	0	0	0.430566	0	2.11586
mmu_circ_008099	chr16_30281399_30281950_F	circRNA	Yes	chr16	30281399	30281950	+	551	551	1	0	551	30281399	30281950	ENSMMUT00000006783	chr16:30279051-30281399|chr16:30281950-30284225	5	4	3	8	2	1	4	15	4	0	3	3	17	0	17	11	3	9	1	1	4	2	0	2	0.613597	5.22478	3.9613	11.7057	6.2069	2.97926	0.861132	0.802748	6.34759
mmu_circ_008276	chr16_43976978_44059137_F	circRNA	Yes	chr16	43976978	44059137	+	762	82159	7	0,1327,26300,36294,71688,74970,82097	91,111,168,132,81,117,62	43976978,43978305,44003278,44013272,44048666,44051948,44059075	43977069,43978416,44003446,44013404,44048747,44052065,44059137	PREDICTED.22118.2	chr16:43975160-43976978|chr16:44059137-44083575	0	0	1	4	6	0	5	1	5	0	1	2	0	4	6	3	9	8	7	0	2	0	0	1	4.29518	0	4.95162	0	0	0.993085	0	0.401374	5.6423
mmu_circ_008386	chr16_48806470_48816575_R	circRNA	Yes	chr16	48806470	48816575	-	648	10105	6	0,643,1696,2755,7443,10007	114,39,147,153,97,98	48806470,48807113,48808166,48809225,48813913,48816477	48806584,48807152,48808313,48809378,48814010,48816575	ENSMMUT00000017344	chr16:48805416-48806470|chr16:48816575-48831547	3	4	3	6	5	0	3	3	0	2	0	1	8	4	8	6	2	3	3	0	0	3	0	1	1.84079	3.13487	2.97097	5.50854	6.2069	2.97926	1.2917	0.401374	2.11586
mmu_circ_008573	chr16_58058720_58060185_F	circRNA	Yes	chr16	58058720	58060185	+	189	1465	2	0,1372	96,93	58058720,58060092	58058816,58060185	ENSMMUT00000015015	chr16:58044324-58058720|chr16:58060185-58066702	3	3	3	5	3	2	6	4	2	0	4	0	5	4	9	1	11	9	1	3	3	0	0	0	0.613597	3.13487	5.94195	3.44284	4.65518	2.97926	0	0	6.34759
mmu_circ_008599	chr16_59500183_59500353_R	ciRNA	Yes	chr16	59500183	59500353	-	170	170	1	0	170	59500183	59500353	PREDICTED.39108.2	chr16:59500159-59500353	0	3	0	25	9	0	0	6	8	0	3	0	10	4	24	11	0	18	0	0	8	1	9	0	0	0	0	6.88568	4.65518	0	0.430566	0	12.6952
mmu_circ_008658	chr16_62045447_62047385_F	circRNA	Yes	chr16	62045447	62047385	+	389	1938	3	0,1195,1841	157,135,97	62045447,62046642,62047288	62045604,62046777,62047385	ENSMMUT00000025827	chr16:62003685-62045447|chr16:62047385-62094440	2	2	0	2	1	0	1	4	0	2	0	0	2	2	4	5	2	3	0	0	1	3	0	0	0	2.08991	0.990325	1.37714	3.10345	0	1.2917	0	2.11586
mmu_circ_008716	chr16_6976460_6976635_R	ciRNA	Yes	chr16	6976460	6976635	-	175	175	1	0	175	6976460	6976635	ENSMMUT00000014758	chr16:6976435-6976635	5	2	0	9	1	0	7	4	2	0	2	0	3	5	3	3	2	1	0	0	1	0	6	0	0	5.22478	6.93227	2.0657	3.10345	0	0	0	0.705287
mmu_circ_008726	chr16_70870687_70870813_F	ciRNA	Yes	chr16	70870687	70870813	+	126	126	1	0	126	70870687	70870813	ENSMMUT00000001742	chr16:70870687-70870841	2	1	0	4	0	0	6	7	0	1	0	0	9	2	5	3	3	12	0	0	4	0	4	0	0	2.08991	5.94195	6.19711	1.55173	0	0	0	8.46345
mmu_circ_008860	chr17_11887391_11897424_R	circRNA	Yes	chr17	11887391	11897424	-	438	10033	4	0,3226,4001,9908	147,77,89,125	11887391,11890617,11891392,11897299	11887538,11890694,11891481,11897424	PREDICTED.24633.4	chr17:11881745-11887391|chr17:11897424-11905621	0	2	0	12	0	5	7	19	6	0	0	4	0	13	35	16	25	0	0	2	20	4	0	0	0	0	6.93227	0	3.10345	0	1.72226	0	0
mmu_circ_008906	chr17_15578220_15578554_R	circRNA	Yes	chr17	15578220	15578554	-	250	334	2	0,175	91,159	15578220,15578395	15578311,15578554	ENSMMUT00000043407	chr17:15571073-15578220|chr17:15578554-15580644	3	0	0	3	2	1	6	9	1	1	2	3	0	3	29	7	4	6	3	0	4	3	1	1	1.84079	3.13487	5.94195	0	0	0	1.2917	0.401374	4.23172
mmu_circ_008966	chr17_20763127_20771180_R	circRNA	Yes	chr17	20763127	20771180	-	363	8053	3	0,5461,7884	116,78,169	20763127,20768588,20771011	20763243,20768666,20771180	ENSMMUT00000016251	chr17:20737951-20763127|chr17:20771180-20782120	31	10	9	32	21	11	30	0	12	4	5	11	37	9	67	24	18	21	13	7	25	3	0	3	7.97677	32.3936	29.7097	25.477	15.5173	8.93777	1.2917	1.20412	14.811
mmu_circ_009034	chr17_28269557_28269915_F	circRNA	Yes	chr17	28269557	28269915	+	358	358	1	0	358	28269557	28269915	PREDICTED.25136.1	chr17:28264598-28269557|chr17:28269915-28277778	5	0	1	0	5	5	6	3	1	0	0	0	2	2	5	3	4	2	4	1	0	0	0	1	2.45439	5.22478	5.94195	1.37714	0	0.993085	0	0.401374	1.41057
mmu_circ_009078	chr17_39523707_39558770_F	circRNA	Yes	chr17	39523707	39558770	+	454	35063	4	0,5428,28411,34921	85,66,161,142	39523707,39529135,39552118,39558628	39523792,39529201,39552279,39558770	ENSMMUT00000010012	chr17:39518089-39523707|chr17:39558770-39577372	9	0	0	11	5	0	0	6	2	6	0	3	0	0	18	6	0	14	8	0	11	0	0	0	4.90878	9.4046	0	0	0	0	0	0	9.87402
mmu_circ_009083	chr17_39552118_39558770_F	circRNA	Yes	chr17	39552118	39558770	+	303	6652	2	0,6510	161,142	39552118,39558628	39552279,39558770	ENSMMUT00000010012	chr17:39529201-39552118|chr17:39558770-39577372	3	0	1	6	5	3	1	7	0	0	1	2	0	2	19	2	5	4	6	0	8	1	0	1	3.68158	3.13487	0.990325	0	0	0.993085	0.430566	0.401374	2.82115
mmu_circ_009160	chr17_6131809_6147726_F	circRNA	Yes	chr17	6131809	6147726	+	328	15917	3	0,11470,15776	76,111,141	6131809,6143279,6147585	6131885,6143390,6147726	ENSMMUT00000020824	chr17:6052602-6131809|chr17:6147726-6178743	4	2	0	3	0	1	1	1	2	3	3	0	1	4	12	6	7	2	5	0	4	0	0	1	3.06799	4.17982	0.990325	0.688568	3.10345	0	0	0.401374	1.41057
mmu_circ_009419	chr18_14559154_14563133_R	circRNA	Yes	chr18	14559154	14563133	-	291	3979	3	0,1814,3864	115,61,115	14559154,14560968,14563018	14559269,14561029,14563133	ENSMMUT00000018212	chr18:14555038-14559154|chr18:14563133-14569195	1	2	2	1	2	0	4	0	2	0	1	3	3	3	0	3	1	0	3	0	3	1	1	3	1.84079	1.04496	3.9613	2.0657	3.10345	1.98617	0.430566	1.20412	0
mmu_circ_009425	chr18_14771494_14774785_F	circRNA	Yes	chr18	14771494	14774785	+	302	3291	2	0,3161	172,130	14771494,14774655	14771666,14774785	ENSMMUT00000014297	chr18:14746671-14771494|chr18:14774785-14779662	1	1	2	3	3	3	1	0	5	1	6	2	3	0	8	2	11	0	0	3	0	0	0	1	0	1.04496	0.990325	2.0657	1.55173	1.98617	0	0.401374	0
mmu_circ_009432	chr18_14771494_14785401_F	circRNA	Yes	chr18	14771494	14785401	+	679	13907	5	0,3161,8168,12314,13702	172,130,105,67,205	14771494,14774655,14779662,14783808,14785196	14771666,14774785,14779767,14783875,14785401	ENSMMUT00000014297	chr18:14746671-14771494|chr18:14785401-14798634	31	18	0	0	0	12	55	63	20	11	10	28	80	5	0	63	49	61	0	6	22	13	4	10	0	32.3936	54.4678	55.0854	27.9311	0	5.59736	4.01374	43.0225
mmu_circ_009443	chr18_14771494_14826320_F	circRNA	Yes	chr18	14771494	14826320	+	1600	54826	11	0,3161,8168,12314,13702,27140,32070,34159,38227,50443,54674	172,130,105,67,205,184,145,134,108,198,152	14771494,14774655,14779662,14783808,14785196,14798634,14803564,14805653,14809721,14821937,14826168	14771666,14774785,14779767,14783875,14785401,14798818,14803709,14805787,14809829,14822135,14826320	ENSMMUT00000014297	chr18:14746671-14771494|chr18:14826320-14846843	11	11	14	15	6	8	20	11	4	3	5	3	16	3	23	28	12	15	6	1	9	0	0	7	3.68158	11.4945	19.8065	11.0171	17.069	13.9032	0	2.80962	10.5793
mmu_circ_009564	chr18_28990668_28996967_R	circRNA	Yes	chr18	28990668	28996967	-	638	6299	5	0,283,3294,3476,6169	176,127,98,107,130	28990668,28990951,28993962,28994144,28996837	28990844,28991078,28994060,28994251,28996967	ENSMMUT00000026402	chr18:28958665-28990668|chr18:28996967-29028637	3	2	2	2	5	0	4	0	0	0	4	1	7	0	6	4	4	3	1	0	0	0	0	1	0.613597	3.13487	3.9613	4.81997	3.10345	1.98617	0	0.401374	2.11586
mmu_circ_009737	chr18_52215732_52236337_F	circRNA	Yes	chr18	52215732	52236337	+	804	20605	4	0,5305,14155,20323	182,177,163,282	52215732,52221037,52229887,52236055	52215914,52221214,52230050,52236337	ENSMMUT00000001767	chr18:52201314-52215732|chr18:52236337-52262605	18	10	8	15	18	4	26	20	7	10	2	8	11	9	19	18	23	14	6	5	7	4	2	4	3.68158	18.8092	25.7484	7.57424	15.5173	7.94468	1.72226	1.6055	9.87402
mmu_circ_009792	chr18_6267526_6279900_R	circRNA	Yes	chr18	6267526	6279900	-	415	12374	3	0,2981,12264	103,202,110	6267526,6270507,6279790	6267629,6270709,6279900	PREDICTED.42513.2	chr18:6244483-6267526|chr18:6279900-6286437	18	0	2	9	8	3	14	11	4	4	5	7	0	4	16	8	0	8	5	2	0	0	0	0	3.06799	18.8092	13.8645	0	0	1.98617	0	0	5.6423
mmu_circ_009828	chr18_72438948_72465599_F	circRNA	Yes	chr18	72438948	72465599	+	220	26651	3	0,17564,26599	109,59,52	72438948,72456512,72465547	72439057,72456571,72465599	ENSMMUT00000030665	chr18:72427969-72438948|chr18:72465599-72486854	50	7	25	31	44	13	62	57	21	9	15	34	56	56	121	51	72	41	20	16	39	7	19	7	12.2719	52.2478	61.4001	38.5598	10.8621	24.8271	3.01396	2.80962	28.9168
mmu_circ_009830	chr18_72438948_72486949_F	circRNA	Yes	chr18	72438948	72486949	+	315	48001	4	0,17564,26599,47906	109,59,52,95	72438948,72456512,72465547,72486854	72439057,72456571,72465599,72486949	ENSMMUT00000030665	chr18:72427969-72438948|chr18:72486949-72503627	9	1	2	8	5	0	15	12	4	1	3	20	9	14	31	6	24	0	5	2	6	2	1	2	3.06799	9.4046	14.8549	6.19711	1.55173	1.98617	0.861132	0.802748	0
mmu_circ_009844	chr18_72438948_72524151_F	circRNA	Yes	chr18	72438948	72524151	+	549	85203	7	0,17564,26599,47906,64679,77993,85126	109,59,52,95,81,76,77	72438948,72456512,72465547,72486854,72503627,72516941,72524074	72439057,72456571,72465599,72486949,72503708,72517017,72524151	ENSMMUT00000030665	chr18:72427969-72438948|chr18:72524151-72563203	0	0	5	10	0	0	15	8	9	3	6	8	20	9	32	0	16	0	0	4	10	0	0	0	0	0	14.8549	13.7714	0	4.96543	0	0	0
mmu_circ_009920	chr19_11552087_11553234_R	circRNA	Yes	chr19	11552087	11553234	-	188	1147	2	0,1020	61,127	11552087,11553107	11552148,11553234	ENSMMUT00000012323	chr19:11551226-11552087|chr19:11553234-11566146	0	4	4	7	12	0	32	18	8	4	6	6	8	10	27	2	22	7	9	2	3	3	0	1	5.52238	0	31.6904	5.50854	6.2069	3.97234	1.2917	0.401374	4.93701
mmu_circ_010142	chr19_44919930_44920454_F	circRNA	Yes	chr19	44919930	44920454	+	282	524	2	0,389	147,135	44919930,44920319	44920077,44920454	ENSMMUT00000004112	chr19:44918165-44919930|None	2	2	0	7	9	0	7	11	5	0	4	0	5	3	8	5	7	3	1	0	7	1	0	0	0.613597	2.08991	6.93227	3.44284	3.10345	0	0.430566	0	2.11586
mmu_circ_010390	chr2_102990360_103015114_R	circRNA	Yes	chr2	102990360	103015114	-	1663	24754	5	0,1272,7518,8907,23773	189,189,119,185,981	102990360,102991632,102997878,102999267,103014133	102990549,102991821,102997997,102999452,103015114	PREDICTED.18780.1	chr2:102983279-102990360|chr2:103015114-103021789	34	15	33	0	0	16	28	46	18	8	6	10	28	8	79	43	27	36	15	8	0	12	0	14	9.20396	35.5285	27.7291	19.2799	23.2759	32.7718	5.16679	5.61923	25.3903
mmu_circ_010392	chr2_102990360_103021852_R	circRNA	Yes	chr2	102990360	103021852	-	1726	31492	6	0,1272,7518,8907,23773,31429	189,189,119,185,981,63	102990360,102991632,102997878,102999267,103014133,103021789	102990549,102991821,102997997,102999452,103015114,103021852	PREDICTED.18780.1	chr2:102983279-102990360|chr2:103021852-103029626	33	15	31	0	0	18	34	58	32	4	11	13	52	9	78	53	14	82	25	13	0	19	0	15	15.3399	34.4835	33.671	35.8055	23.2759	30.7856	8.18076	6.02061	57.8336
mmu_circ_010395	chr2_102997878_103015114_R	circRNA	Yes	chr2	102997878	103015114	-	1285	17236	3	0,1389,16255	119,185,981	102997878,102999267,103014133	102997997,102999452,103015114	PREDICTED.32111.7	chr2:102991821-102997878|chr2:103015114-103021789	5	2	7	3	0	3	8	10	7	5	0	3	7	0	12	4	11	11	5	0	0	0	2	4	3.06799	5.22478	7.9226	4.81997	3.10345	6.9516	0	1.6055	7.75816
mmu_circ_010404	chr2_103014133_103015114_R	circRNA	Yes	chr2	103014133	103015114	-	981	981	1	0	981	103014133	103015114	PREDICTED.50754.1	chr2:103011462-103014133|chr2:103015114-103021789	25	6	7	14	5	0	26	14	11	2	3	3	22	1	23	20	7	26	15	3	9	3	0	0	9.20396	26.1239	25.7484	15.1485	9.31035	6.9516	1.2917	0	18.3375
mmu_circ_010405	chr2_103014133_103021852_R	circRNA	Yes	chr2	103014133	103021852	-	1044	7719	2	0,7656	981,63	103014133,103021789	103015114,103021852	PREDICTED.50754.1	chr2:103011462-103014133|chr2:103021852-103029672	29	7	4	14	6	9	24	31	22	4	2	5	18	3	25	23	11	15	10	5	6	11	2	0	6.13597	30.3037	23.7678	12.3942	10.8621	3.97234	4.73623	0	10.5793
mmu_circ_010447	chr2_107006668_107008809_R	circRNA	Yes	chr2	107006668	107008809	-	321	2141	2	0,1974	154,167	107006668,107008642	107006822,107008809	PREDICTED.30128.2	chr2:106992063-107006668|chr2:107008809-107011611	6	0	4	0	0	0	5	5	2	1	2	3	4	5	4	3	9	7	0	1	0	0	0	0	0	6.26973	4.95162	2.75427	0	3.97234	0	0	4.93701
mmu_circ_010493	chr2_114783377_114787421_R	circRNA	Yes	chr2	114783377	114787421	-	526	4044	2	0,3800	282,244	114783377,114787177	114783659,114787421	ENSMMUT00000005952	chr2:114748339-114783377|chr2:114787421-114808349	3	3	0	0	8	1	10	3	2	2	2	5	3	2	4	9	14	4	0	2	3	1	0	0	0	3.13487	9.90325	2.0657	4.65518	0	0.430566	0	2.82115
mmu_circ_010509	chr2_116858591_116862368_F	circRNA	Yes	chr2	116858591	116862368	+	258	3777	2	0,3678	159,99	116858591,116862269	116858750,116862368	PREDICTED.30644.2	chr2:116837511-116858591|chr2:116862368-116871446	11	4	3	6	7	5	17	12	5	2	6	4	17	6	28	11	27	6	2	4	2	1	0	1	1.22719	11.4945	16.8355	11.7057	6.2069	2.97926	0.430566	0.401374	4.23172
mmu_circ_010510	chr2_116858591_116871693_F	circRNA	Yes	chr2	116858591	116871693	+	505	13102	3	0,3678,12855	159,99,247	116858591,116862269,116871446	116858750,116862368,116871693	PREDICTED.29136.1	chr2:116837511-116858591|chr2:116871693-116878552	2	1	1	6	4	2	9	0	2	1	3	3	11	5	10	6	2	0	0	0	4	1	0	2	0	2.08991	8.91292	7.57424	1.55173	0.993085	0.430566	0.802748	0
mmu_circ_010555	chr2_129484214_129555366_R	circRNA	Yes	chr2	129484214	129555366	-	496	71152	3	0,69716,70956	174,126,196	129484214,129553930,129555170	129484388,129554056,129555366	ENSMMUT00000006983	chr2:129385432-129484214|chr2:129555366-129564459	7	3	0	4	2	0	5	3	3	0	5	0	5	0	2	4	0	6	0	1	0	2	0	0	0	7.31469	4.95162	3.44284	4.65518	0	0.861132	0	4.23172
mmu_circ_010556	chr2_129553930_129555366_R	circRNA	Yes	chr2	129553930	129555366	-	322	1436	2	0,1240	126,196	129553930,129555170	129554056,129555366	ENSMMUT00000006984	chr2:129385432-129553930|chr2:129555366-129564473	8	2	4	4	8	1	16	12	8	2	3	3	9	7	3	3	11	5	1	0	4	0	0	0	0.613597	8.35964	15.8452	6.19711	3.10345	3.97234	0	0	3.52644
mmu_circ_010595	chr2_135238372_135256234_R	circRNA	Yes	chr2	135238372	135256234	-	372	17862	2	0,17691	201,171	135238372,135256063	135238573,135256234	ENSMMUT00000022365	chr2:135226576-135238372|chr2:135256234-135375260	1	2	1	1	2	3	0	2	4	0	2	3	0	2	3	1	3	3	0	0	7	1	1	0	0	1.04496	0	0	3.10345	0.993085	0.430566	0	2.11586
mmu_circ_010814	chr2_173225548_173247744_R	circRNA	Yes	chr2	173225548	173247744	-	342	22196	3	0,7974,21996	90,52,200	173225548,173233522,173247544	173225638,173233574,173247744	ENSMMUT00000014005	chr2:173174765-173225548|chr2:173247744-173278802	4	4	4	7	4	3	6	8	8	1	0	3	3	1	13	3	1	5	2	0	10	2	0	3	1.22719	4.17982	5.94195	2.0657	6.2069	3.97234	0.861132	1.20412	3.52644
mmu_circ_010824	chr2_173225548_173289402_R	circRNA	Yes	chr2	173225548	173289402	-	741	63854	8	0,7974,21996,53254,53631,58415,63597,63774	90,52,200,82,65,117,55,80	173225548,173233522,173247544,173278802,173279179,173283963,173289145,173289322	173225638,173233574,173247744,173278884,173279244,173284080,173289200,173289402	ENSMMUT00000014005	chr2:173174765-173225548|chr2:173289402-173294917	0	11	0	11	3	8	8	0	12	2	0	5	0	0	0	0	0	19	6	2	32	0	0	6	3.68158	0	7.9226	0	17.069	0	0	2.40824	13.4005
mmu_circ_010973	chr2_189036368_189048246_F	circRNA	Yes	chr2	189036368	189048246	+	247	11878	3	0,9960,11765	68,66,113	189036368,189046328,189048133	189036436,189046394,189048246	ENSMMUT00000045193	chr2:189031838-189036368|chr2:189048246-189066906	62	25	33	54	69	14	113	58	43	15	21	20	52	89	150	39	109	45	27	10	46	15	9	10	16.5671	64.7872	111.907	35.8055	38.7931	32.7718	6.45849	4.01374	31.7379
mmu_circ_010992	chr2_20044063_20046839_R	circRNA	Yes	chr2	20044063	20046839	-	2776	2776	1	0	2776	20044063	20046839	ENSMMUT00000047097	chr2:20028278-20044063|chr2:20046839-20120948	3	1	3	1	6	7	1	7	23	2	0	2	0	0	11	0	0	6	1	4	8	5	0	4	0.613597	3.13487	0.990325	0	1.55173	2.97926	2.15283	1.6055	4.23172
mmu_circ_011105	chr2_45290723_45308296_R	circRNA	Yes	chr2	45290723	45308296	-	566	17573	3	0,10012,17492	349,136,81	45290723,45300735,45308215	45291072,45300871,45308296	PREDICTED.28127.5	chr2:45265981-45290723|chr2:45308296-45343776	9	2	2	5	4	6	8	22	0	3	2	3	16	0	37	10	13	14	6	1	9	0	0	4	3.68158	9.4046	7.9226	11.0171	3.10345	1.98617	0	1.6055	9.87402
mmu_circ_011216	chr2_5966068_6029855_R	circRNA	Yes	chr2	5966068	6029855	-	849	63787	6	0,3706,6183,7128,28365,63617	210,91,136,126,116,170	5966068,5969774,5972251,5973196,5994433,6029685	5966278,5969865,5972387,5973322,5994549,6029855	ENSMMUT00000022317	chr2:5920114-5966068|chr2:6029855-6080566	3	1	0	0	4	1	0	0	3	2	1	5	2	3	10	4	11	7	1	2	3	0	0	1	0.613597	3.13487	0	1.37714	1.55173	0	0	0.401374	4.93701
mmu_circ_011262	chr2_69918726_69945415_R	circRNA	Yes	chr2	69918726	69945415	-	420	26689	4	0,1242,19966,26532	48,105,110,157	69918726,69919968,69938692,69945258	69918774,69920073,69938802,69945415	PREDICTED.17413.2	chr2:69834274-69918726|chr2:69945415-69960913	10	0	2	7	7	0	5	4	0	3	0	7	7	0	13	4	0	15	0	3	4	0	2	1	0	10.4496	4.95162	4.81997	0	1.98617	0	0.401374	10.5793
mmu_circ_011320	chr2_79796174_79796634_R	circRNA	Yes	chr2	79796174	79796634	-	270	460	2	0,294	104,166	79796174,79796468	79796278,79796634	PREDICTED.49311.3	chr2:79794125-79796174|chr2:79796634-79798683	3	3	2	6	3	2	15	12	4	0	0	0	10	0	18	9	10	13	5	2	4	0	0	1	3.06799	3.13487	14.8549	6.88568	4.65518	1.98617	0	0.401374	9.16873
mmu_circ_011418	chr2_86313917_86314652_R	circRNA	Yes	chr2	86313917	86314652	-	227	735	2	0,669	161,66	86313917,86314586	86314078,86314652	ENSMMUT00000006944	chr2:86313201-86313917|chr2:86314652-86315746	10	2	3	4	5	1	13	4	1	2	4	2	4	7	5	0	0	2	0	2	8	0	3	1	0	10.4496	12.8742	2.75427	3.10345	2.97926	0	0.401374	1.41057
mmu_circ_011773	chr20_23274449_23285452_F	circRNA	Yes	chr20	23274449	23285452	+	770	11003	7	0,1361,2924,3349,10028,10556,10865	176,33,81,52,143,147,138	23274449,23275810,23277373,23277798,23284477,23285005,23285314	23274625,23275843,23277454,23277850,23284620,23285152,23285452	ENSMMUT00000028730	chr20:23273228-23274449|chr20:23285452-23286723	4	0	0	6	2	4	7	5	2	1	0	0	0	2	9	3	0	3	0	0	0	2	1	1	0	4.17982	6.93227	0	0	0	0.861132	0.401374	2.11586
mmu_circ_011815	chr20_26964213_26966407_R	circRNA	Yes	chr20	26964213	26966407	-	220	2194	2	0,2055	81,139	26964213,26966268	26964294,26966407	PREDICTED.35875.1	chr20:26961196-26964213|chr20:26966407-26967857	2	1	0	11	9	1	4	4	0	0	2	5	4	8	4	0	5	5	1	3	5	0	7	0	0.613597	2.08991	3.9613	2.75427	1.55173	0	0	0	3.52644
mmu_circ_011853	chr20_29319557_29319983_F	circRNA	Yes	chr20	29319557	29319983	+	327	426	2	0,195	96,231	29319557,29319752	29319653,29319983	PREDICTED.49308.2	chr20:29315422-29319557|chr20:29319983-29321074	28	21	18	48	49	24	32	24	0	11	23	19	60	26	77	40	53	31	9	7	31	0	7	0	5.52238	29.2587	31.6904	41.3141	32.5862	17.8755	0	0	21.8639
mmu_circ_011903	chr20_45697008_45715127_F	circRNA	Yes	chr20	45697008	45715127	+	518	18119	5	0,2212,5636,14263,18038	90,139,100,108,81	45697008,45699220,45702644,45711271,45715046	45697098,45699359,45702744,45711379,45715127	ENSMMUT00000006667	chr20:45664663-45697008|chr20:45715127-45744651	16	11	17	14	15	10	23	18	19	4	3	9	29	16	41	14	15	32	8	7	16	3	2	5	4.90878	16.7193	22.7775	19.9685	17.069	16.8824	1.2917	2.00687	22.5692
mmu_circ_011904	chr20_45697008_45744767_F	circRNA	Yes	chr20	45697008	45744767	+	634	47759	6	0,2212,5636,14263,18038,47643	90,139,100,108,81,116	45697008,45699220,45702644,45711271,45715046,45744651	45697098,45699359,45702744,45711379,45715127,45744767	ENSMMUT00000006667	chr20:45664663-45697008|chr20:45744767-45776894	20	5	3	6	10	6	36	14	13	3	0	5	34	11	31	12	12	29	11	6	17	4	0	3	6.74957	20.8991	35.6517	23.4113	7.75863	2.97926	1.72226	1.20412	20.4533
mmu_circ_012242	chr3_10231050_10233173_R	circRNA	Yes	chr3	10231050	10233173	-	213	2123	2	0,2077	167,46	10231050,10233127	10231217,10233173	ENSMMUT00000028179	chr3:10226006-10231050|chr3:10233173-10235107	10	0	7	5	6	5	16	2	4	0	0	3	8	9	10	8	7	6	3	3	2	1	3	2	1.84079	10.4496	15.8452	5.50854	0	6.9516	0.430566	0.802748	4.23172
mmu_circ_012245	chr3_10250155_10255475_R	circRNA	Yes	chr3	10250155	10255475	-	420	5320	3	0,2917,5177	129,148,143	10250155,10253072,10255332	10250284,10253220,10255475	ENSMMUT00000028179	chr3:10249946-10250155|chr3:10255475-10256603	30	6	13	11	13	0	27	24	9	10	0	7	33	14	37	7	23	17	0	4	8	0	3	3	0	31.3487	26.7388	22.7227	9.31035	12.9101	0	1.20412	11.9899
mmu_circ_012372	chr3_125226867_125227639_R	circRNA	Yes	chr3	125226867	125227639	-	314	772	2	0,657	199,115	125226867,125227524	125227066,125227639	ENSMMUT00000003357	chr3:125226286-125226867|chr3:125227639-125233092	14	0	2	14	12	0	8	9	5	0	2	5	15	5	21	9	4	9	6	4	7	0	3	0	3.68158	14.6294	7.9226	10.3285	0	1.98617	0	0	6.34759
mmu_circ_012452	chr3_139559131_139566453_R	circRNA	Yes	chr3	139559131	139566453	-	449	7322	3	0,4355,7184	168,143,138	139559131,139563486,139566315	139559299,139563629,139566453	ENSMMUT00000042015	chr3:139554847-139559131|chr3:139566453-139582629	8	0	2	8	9	3	14	12	0	3	1	4	9	6	13	10	9	5	5	2	10	2	0	1	3.06799	8.35964	13.8645	6.19711	0	1.98617	0.861132	0.401374	3.52644
mmu_circ_012525	chr3_145170659_145176677_F	circRNA	Yes	chr3	145170659	145176677	+	427	6018	4	0,3945,4430,5944	168,101,84,74	145170659,145174604,145175089,145176603	145170827,145174705,145175173,145176677	ENSMMUT00000024767	chr3:145165977-145170659|chr3:145176677-145179325	12	2	5	7	10	7	16	8	5	0	4	3	14	0	25	0	8	0	11	1	10	4	0	2	6.74957	12.5395	15.8452	9.63995	3.10345	4.96543	1.72226	0.802748	0
mmu_circ_012791	chr3_188422618_188441697_R	circRNA	Yes	chr3	188422618	188441697	-	410	19079	6	0,839,1004,5735,12746,19007	82,48,57,83,68,72	188422618,188423457,188423622,188428353,188435364,188441625	188422700,188423505,188423679,188428436,188435432,188441697	ENSMMUT00000008744	chr3:188419235-188422618|chr3:188441697-188470409	14	6	7	12	13	0	10	26	6	2	0	6	6	0	22	0	0	0	4	2	9	5	1	6	2.45439	14.6294	9.90325	4.13141	9.31035	6.9516	2.15283	2.40824	0
mmu_circ_012856	chr3_194487066_194488030_F	circRNA	Yes	chr3	194487066	194488030	+	171	964	2	0,853	60,111	194487066,194487919	194487126,194488030	ENSMMUT00000004497	chr3:194484230-194487066|chr3:194488030-194503033	10	0	4	3	13	4	14	9	8	0	3	3	1	8	15	3	8	6	4	3	9	0	2	0	2.45439	10.4496	13.8645	0.688568	0	3.97234	0	0	4.23172
mmu_circ_012925	chr3_31122981_31126472_R	circRNA	Yes	chr3	31122981	31126472	-	223	3491	2	0,3413	145,78	31122981,31126394	31123126,31126472	ENSMMUT00000026357	chr3:31111321-31122981|chr3:31126472-31158738	1	0	2	6	9	0	5	6	5	0	3	4	2	11	20	5	12	7	4	0	4	1	1	2	2.45439	1.04496	4.95162	1.37714	0	1.98617	0.430566	0.802748	4.93701
mmu_circ_013004	chr3_47382251_47382535_F	circRNA	Yes	chr3	47382251	47382535	+	192	284	2	0,203	111,81	47382251,47382454	47382362,47382535	ENSMMUT00000042457	chr3:47381639-47382251|chr3:47382535-47383207	9	2	0	5	11	3	34	0	9	4	4	3	4	15	9	4	18	6	4	3	4	3	0	0	2.45439	9.4046	33.671	2.75427	3.10345	0	1.2917	0	4.23172
mmu_circ_013168	chr3_81496219_81498593_F	circRNA	Yes	chr3	81496219	81498593	+	192	2374	2	0,2260	78,114	81496219,81498479	81496297,81498593	PREDICTED.35852.2	chr3:81491804-81496219|chr3:81498593-81504892	2	0	1	0	4	2	3	0	0	1	2	2	4	0	4	3	4	0	2	2	0	0	2	0	1.22719	2.08991	2.97097	2.75427	0	0.993085	0	0	0
mmu_circ_013176	chr3_81669253_81670101_R	circRNA	Yes	chr3	81669253	81670101	-	238	848	2	0,701	91,147	81669253,81669954	81669344,81670101	ENSMMUT00000003777	chr3:81668249-81669253|chr3:81670101-81670554	0	1	0	0	3	1	4	4	2	2	2	1	3	5	6	2	4	2	1	0	4	0	0	2	0.613597	0	3.9613	2.0657	1.55173	0	0	0.802748	1.41057
mmu_circ_013177	chr3_81696426_81698887_R	circRNA	Yes	chr3	81696426	81698887	-	295	2461	2	0,2269	103,192	81696426,81698695	81696529,81698887	ENSMMUT00000003777	chr3:81677228-81696426|chr3:81698887-81720342	2	2	0	3	0	0	2	2	2	2	0	3	1	9	8	2	3	6	1	4	5	2	0	0	0.613597	2.08991	1.98065	0.688568	3.10345	0	0.861132	0	4.23172
mmu_circ_013236	chr3_93178058_93178204_R	circRNA	Yes	chr3	93178058	93178204	-	146	146	1	0	146	93178058	93178204	PREDICTED.37126.1	chr3:93170296-93178058|chr3:93178204-93186529	3	0	3	2	9	0	8	6	2	1	3	1	5	2	8	1	7	7	1	0	3	0	6	0	0.613597	3.13487	7.9226	3.44284	0	2.97926	0	0	4.93701
mmu_circ_013358	chr4_108179408_108186280_R	circRNA	Yes	chr4	108179408	108186280	-	447	6872	3	0,1988,6710	131,154,162	108179408,108181396,108186118	108179539,108181550,108186280	ENSMMUT00000021263	chr4:108170010-108179408|chr4:108186280-108196288	10	1	4	3	2	1	14	2	0	0	4	2	7	8	14	3	9	10	8	2	11	1	0	1	4.90878	10.4496	13.8645	4.81997	1.55173	3.97234	0.430566	0.401374	7.05287
mmu_circ_013726	chr4_167548271_167554069_R	circRNA	Yes	chr4	167548271	167554069	-	320	5798	3	0,2500,5690	130,82,108	167548271,167550771,167553961	167548401,167550853,167554069	ENSMMUT00000027981	chr4:167541823-167548271|chr4:167554069-167558370	8	3	3	4	9	5	7	10	10	3	3	6	12	7	21	4	16	9	3	0	6	0	0	0	1.84079	8.35964	6.93227	8.26281	4.65518	2.97926	0	0	6.34759
mmu_circ_013732	chr4_17571700_17578916_F	circRNA	Yes	chr4	17571700	17578916	+	336	7216	3	0,466,7110	144,86,106	17571700,17572166,17578810	17571844,17572252,17578916	ENSMMUT00000002819	chr4:17525677-17571700|chr4:17578916-17604375	5	2	1	4	8	2	6	4	3	0	6	4	7	10	12	2	16	11	4	7	2	1	0	1	2.45439	5.22478	5.94195	4.81997	3.10345	0.993085	0.430566	0.401374	7.75816
mmu_circ_013827	chr4_30161513_30161780_F	circRNA	Yes	chr4	30161513	30161780	+	189	267	2	0,153	75,114	30161513,30161666	30161588,30161780	ENSMMUT00000002661	chr4:30160462-30161513|chr4:30161780-30164101	3	0	0	3	7	1	7	0	3	4	0	2	4	0	7	2	7	3	2	1	0	0	0	0	1.22719	3.13487	6.93227	2.75427	0	0	0	0	2.11586
mmu_circ_013943	chr4_42736408_42738386_F	circRNA	Yes	chr4	42736408	42738386	+	207	1978	2	0,1877	106,101	42736408,42738285	42736514,42738386	ENSMMUT00000040642	chr4:42709268-42736408|chr4:42738386-42740810	3	2	0	0	3	1	6	5	3	0	0	3	2	4	11	0	4	2	2	1	3	2	1	0	1.22719	3.13487	5.94195	1.37714	3.10345	0	0.861132	0	1.41057
mmu_circ_013955	chr4_43067752_43067936_F	ciRNA	Yes	chr4	43067752	43067936	+	184	184	1	0	184	43067752	43067936	ENSMMUT00000040600	chr4:43067752-43067964	0	21	37	89	78	29	112	0	0	12	7	28	57	44	0	0	0	0	45	0	68	6	0	14	27.6119	0	110.916	39.2484	32.5862	36.7442	2.5834	5.61923	0
mmu_circ_014010	chr4_4766090_4766757_F	circRNA	Yes	chr4	4766090	4766757	+	667	667	1	0	667	4766090	4766757	ENSMMUT00000006997	chr4:4610393-4766090|chr4:4766757-4808680	5	5	3	6	6	2	6	5	6	3	4	2	10	2	13	9	8	10	1	0	3	1	0	0	0.613597	5.22478	5.94195	6.88568	7.75863	2.97926	0.430566	0	7.05287
mmu_circ_014028	chr4_53822248_53875750_F	circRNA	Yes	chr4	53822248	53875750	+	501	53502	7	0,11355,11504,11727,20650,41154,53373	72,66,84,60,45,45,129	53822248,53833603,53833752,53833975,53842898,53863402,53875621	53822320,53833669,53833836,53834035,53842943,53863447,53875750	ENSMMUT00000017929	chr4:53797385-53822248|chr4:53875750-53917205	53	10	9	2	18	6	69	4	8	9	0	7	18	15	21	14	49	13	20	0	0	4	2	0	12.2719	55.3826	68.3324	12.3942	15.5173	8.93777	1.72226	0	9.16873
mmu_circ_014066	chr4_57130142_57135331_F	circRNA	Yes	chr4	57130142	57135331	+	259	5189	2	0,5003	73,186	57130142,57135145	57130215,57135331	ENSMMUT00000001619	chr4:57109365-57130142|chr4:57135331-57201022	4	1	0	2	2	0	3	4	3	0	1	3	4	8	11	3	9	3	0	3	0	0	2	0	0	4.17982	2.97097	2.75427	1.55173	0	0	0	2.11586
mmu_circ_014269	chr4_95400562_95404880_R	circRNA	Yes	chr4	95400562	95404880	-	375	4318	4	0,474,2036,4236	144,57,92,82	95400562,95401036,95402598,95404798	95400706,95401093,95402690,95404880	PREDICTED.41537.2	chr4:95389761-95400562|chr4:95404880-95412514	1	5	2	2	5	0	3	3	7	1	1	1	5	2	13	3	1	7	0	0	1	0	0	2	0	1.04496	2.97097	3.44284	7.75863	1.98617	0	0.802748	4.93701
mmu_circ_014422	chr5_121315473_121327289_R	circRNA	Yes	chr5	121315473	121327289	-	396	11816	4	0,6222,7955,11680	71,66,123,136	121315473,121321695,121323428,121327153	121315544,121321761,121323551,121327289	ENSMMUT00000003030	chr5:121293971-121315473|chr5:121327289-121358491	7	0	2	0	4	2	5	3	2	0	5	2	2	4	5	2	8	2	2	0	3	0	1	1	1.22719	7.31469	4.95162	1.37714	0	1.98617	0	0.401374	1.41057
mmu_circ_014432	chr5_12778925_12790164_R	circRNA	Yes	chr5	12778925	12790164	-	276	11239	3	0,1075,11173	130,80,66	12778925,12780000,12790098	12779055,12780080,12790164	ENSMMUT00000042392	chr5:12726117-12778925|chr5:12790164-12840440	0	2	3	7	4	0	5	7	3	1	0	3	5	7	0	4	5	5	4	3	7	0	3	0	2.45439	0	4.95162	3.44284	3.10345	2.97926	0	0	3.52644
mmu_circ_014455	chr5_133397051_133417470_R	circRNA	Yes	chr5	133397051	133417470	-	406	20419	3	0,1957,20168	83,72,251	133397051,133399008,133417219	133397134,133399080,133417470	PREDICTED.22677.2	chr5:133375245-133397051|chr5:133417470-133596324	6	0	2	2	4	0	11	0	2	1	0	0	2	1	6	0	3	3	2	0	5	0	0	0	1.22719	6.26973	10.8936	1.37714	0	1.98617	0	0	2.11586
mmu_circ_014472	chr5_135960594_135961059_F	circRNA	Yes	chr5	135960594	135961059	+	269	465	2	0,345	149,120	135960594,135960939	135960743,135961059	ENSMMUT00000001198	chr5:135957625-135960594|chr5:135961059-135961627	21	1	4	14	19	5	30	14	10	6	4	6	24	8	23	14	29	17	5	12	6	7	0	2	3.06799	21.9441	29.7097	16.5256	1.55173	3.97234	3.01396	0.802748	11.9899
mmu_circ_014509	chr5_140155342_140181652_F	circRNA	Yes	chr5	140155342	140181652	+	488	26310	5	0,6780,15293,24483,26150	75,88,59,106,160	140155342,140162122,140170635,140179825,140181492	140155417,140162210,140170694,140179931,140181652	ENSMMUT00000020968	chr5:140129905-140155342|chr5:140181652-140233921	0	6	3	10	10	5	18	2	8	3	2	0	10	0	12	0	13	0	4	2	0	3	1	0	2.45439	0	17.8258	6.88568	9.31035	2.97926	1.2917	0	0
mmu_circ_014513	chr5_140162122_140181652_F	circRNA	Yes	chr5	140162122	140181652	+	413	19530	4	0,8513,17703,19370	88,59,106,160	140162122,140170635,140179825,140181492	140162210,140170694,140179931,140181652	ENSMMUT00000020968	chr5:140155417-140162122|chr5:140181652-140233921	0	1	1	4	4	0	7	3	5	1	0	4	5	0	11	2	14	0	6	3	6	2	1	2	3.68158	0	6.93227	3.44284	1.55173	0.993085	0.861132	0.802748	0
mmu_circ_014536	chr5_144554817_144560149_R	circRNA	Yes	chr5	144554817	144560149	-	259	5332	2	0,5197	124,135	144554817,144560014	144554941,144560149	ENSMMUT00000028595	chr5:144553119-144554817|chr5:144560149-144568719	1	2	0	2	0	0	0	4	0	0	2	1	3	2	8	5	2	3	0	0	7	0	2	0	0	1.04496	0	2.0657	3.10345	0	0	0	2.11586
mmu_circ_014927	chr5_53508581_53509293_R	circRNA	Yes	chr5	53508581	53509293	-	712	712	1	0	712	53508581	53509293	PREDICTED.53385.2	chr5:53493646-53508581|chr5:53509293-53514541	5	0	0	2	0	3	3	0	0	1	1	2	0	3	3	3	2	2	4	1	3	0	0	0	2.45439	5.22478	2.97097	0	0	0	0	0	1.41057
mmu_circ_015060	chr5_79997804_79999239_F	circRNA	Yes	chr5	79997804	79999239	+	1024	1435	2	0,532	121,903	79997804,79998336	79997925,79999239	PREDICTED.70797.1	chr5:79901101-79997804|chr5:79999239-80037024	4	7	2	3	5	0	0	4	2	2	3	0	6	3	3	6	0	5	0	0	5	0	0	0	0	4.17982	0	4.13141	10.8621	1.98617	0	0	3.52644
mmu_circ_015243	chr6_119937863_119949709_F	circRNA	Yes	chr6	119937863	119949709	+	537	11846	3	0,7499,11776	426,41,70	119937863,119945362,119949639	119938289,119945403,119949709	ENSMMUT00000009302	chr6:119905559-119937863|chr6:119949709-119964602	46	11	4	13	19	13	36	19	18	9	5	15	20	8	39	21	30	29	30	3	16	10	0	2	18.4079	48.0679	35.6517	13.7714	17.069	3.97234	4.30566	0.802748	20.4533
mmu_circ_015451	chr6_132617343_132617915_F	circRNA	Yes	chr6	132617343	132617915	+	572	572	1	0	572	132617343	132617915	PREDICTED.86358.1	chr6:132611566-132617343|chr6:132617915-132624624	6	4	2	8	3	5	5	0	6	3	3	0	6	2	12	3	5	3	3	3	4	4	0	0	1.84079	6.26973	4.95162	4.13141	6.2069	1.98617	1.72226	0	2.11586
mmu_circ_015458	chr6_134285265_134289462_F	circRNA	Yes	chr6	134285265	134289462	+	285	4197	3	0,2918,4064	102,50,133	134285265,134288183,134289329	134285367,134288233,134289462	PREDICTED.44337.1	chr6:134283750-134285265|chr6:134289462-134290742	35	6	12	29	27	9	20	31	14	0	15	13	29	39	99	24	40	26	16	5	25	6	11	4	9.81756	36.5734	19.8065	19.9685	9.31035	11.917	2.5834	1.6055	18.3375
mmu_circ_015464	chr6_134290742_134290950_F	circRNA	Yes	chr6	134290742	134290950	+	208	208	1	0	208	134290742	134290950	PREDICTED.44337.1	chr6:134289462-134290742|chr6:134290950-134293719	54	6	33	38	46	11	26	86	30	14	18	9	39	34	117	30	46	66	30	9	52	3	13	5	18.4079	56.4276	25.7484	26.8541	9.31035	32.7718	1.2917	2.00687	46.549
mmu_circ_015578	chr6_139835901_139837098_R	circRNA	Yes	chr6	139835901	139837098	-	1197	1197	1	0	1197	139835901	139837098	ENSMMUT00000000618	chr6:139751646-139835901|chr6:139837098-139839461	5	4	5	6	1	2	6	4	2	1	1	1	5	0	5	1	4	7	2	0	3	3	0	3	1.22719	5.22478	5.94195	3.44284	6.2069	4.96543	1.2917	1.20412	4.93701
mmu_circ_015704	chr6_169331983_169334886_F	circRNA	Yes	chr6	169331983	169334886	+	224	2903	2	0,2780	101,123	169331983,169334763	169332084,169334886	ENSMMUT00000004339	chr6:169326102-169331983|chr6:169334886-169351114	8	3	1	5	0	3	4	3	5	1	2	1	2	2	3	2	3	4	3	0	3	0	2	0	1.84079	8.35964	3.9613	1.37714	4.65518	0.993085	0	0	2.82115
mmu_circ_016048	chr6_63909249_63925462_F	circRNA	Yes	chr6	63909249	63925462	+	899	16213	10	0,1493,2610,9473,11433,12136,13326,13700,14152,16143	79,90,57,64,75,145,73,130,116,70	63909249,63910742,63911859,63918722,63920682,63921385,63922575,63922949,63923401,63925392	63909328,63910832,63911916,63918786,63920757,63921530,63922648,63923079,63923517,63925462	ENSMMUT00000041569	chr6:63892923-63909249|chr6:63925462-63941907	12	0	2	3	6	0	4	0	2	1	0	2	0	0	10	2	0	6	2	3	1	0	0	0	1.22719	12.5395	3.9613	0	0	1.98617	0	0	4.23172
mmu_circ_016092	chr6_69020276_69025172_F	circRNA	Yes	chr6	69020276	69025172	+	241	4896	2	0,4762	107,134	69020276,69025038	69020383,69025172	ENSMMUT00000029424	chr6:69014238-69020276|chr6:69025172-69031850	9	4	4	13	9	4	24	15	7	5	2	6	10	8	36	2	12	7	6	2	10	0	10	2	3.68158	9.4046	23.7678	6.88568	6.2069	3.97234	0	0.802748	4.93701
mmu_circ_016117	chr6_69238216_69240983_F	circRNA	Yes	chr6	69238216	69240983	+	268	2767	2	0,2611	112,156	69238216,69240827	69238328,69240983	ENSMMUT00000021633	chr6:69231984-69238216|chr6:69240983-69241684	10	1	2	4	0	1	20	6	4	5	3	4	4	9	8	0	3	6	5	2	5	0	0	2	3.06799	10.4496	19.8065	2.75427	1.55173	1.98617	0	0.802748	4.23172
mmu_circ_016141	chr6_73699670_73701378_R	circRNA	Yes	chr6	73699670	73701378	-	181	1708	2	0,1659	132,49	73699670,73701329	73699802,73701378	ENSMMUT00000030069	chr6:73695740-73699670|chr6:73701378-73714305	53	12	29	54	54	19	56	108	38	13	8	42	80	41	122	53	109	89	31	11	31	6	17	0	19.0215	55.3826	55.4582	55.0854	18.6207	28.7995	2.5834	0	62.7706
mmu_circ_016162	chr6_75664579_75683702_R	circRNA	Yes	chr6	75664579	75683702	-	522	19123	4	0,9033,13039,18966	140,93,132,157	75664579,75673612,75677618,75683545	75664719,75673705,75677750,75683702	PREDICTED.46906.2	chr6:75630189-75664579|chr6:75683702-75740106	4	15	17	13	9	11	8	17	8	7	6	13	16	6	55	18	43	37	0	5	41	0	1	12	0	4.17982	7.9226	11.0171	23.2759	16.8824	0	4.81649	26.0956
mmu_circ_016271	chr6_91726674_91727726_R	circRNA	Yes	chr6	91726674	91727726	-	249	1052	2	0,927	124,125	91726674,91727601	91726798,91727726	PREDICTED.84491.2	chr6:91722156-91726674|chr6:91727726-91730711	4	2	1	0	4	2	5	7	4	0	0	0	3	15	0	3	12	4	1	0	0	0	2	0	0.613597	4.17982	4.95162	2.0657	3.10345	0.993085	0	0	2.82115
mmu_circ_016564	chr7_128599861_128600291_F	circRNA	Yes	chr7	128599861	128600291	+	430	430	1	0	430	128599861	128600291	ENSMMUT00000039800	chr7:128437526-128599861|chr7:128600291-128658801	11	0	5	0	3	0	21	4	0	3	4	0	2	0	4	0	3	6	0	0	2	1	0	0	0	11.4945	20.7968	1.37714	0	4.96543	0.430566	0	4.23172
mmu_circ_016766	chr7_154695485_154699683_R	circRNA	Yes	chr7	154695485	154699683	-	717	4198	2	0,4099	618,99	154695485,154699584	154696103,154699683	ENSMMUT00000020961	chr7:154690895-154695485|chr7:154699683-154704675	4	0	1	2	2	0	6	3	1	1	1	1	2	0	2	2	3	3	2	0	2	1	0	0	1.22719	4.17982	5.94195	1.37714	0	0.993085	0.430566	0	2.11586
mmu_circ_016870	chr7_165332309_165333061_F	circRNA	Yes	chr7	165332309	165333061	+	251	752	2	0,676	175,76	165332309,165332985	165332484,165333061	ENSMMUT00000008119	chr7:165331826-165332309|chr7:165333061-165333932	5	0	1	1	0	0	3	2	4	2	4	1	2	5	5	5	3	6	1	2	1	5	0	2	0.613597	5.22478	2.97097	1.37714	0	0.993085	2.15283	0.802748	4.23172
mmu_circ_016934	chr7_20095753_20096884_F	circRNA	Yes	chr7	20095753	20096884	+	1131	1131	1	0	1131	20095753	20096884	PREDICTED.79502.3	chr7:20020527-20095753|chr7:20096884-20118674	0	5	7	9	17	7	63	24	13	10	6	14	0	8	45	30	16	0	13	8	15	5	3	0	7.97677	0	62.3904	0	7.75863	6.9516	2.15283	0	0
mmu_circ_017022	chr7_22734933_22743143_F	circRNA	Yes	chr7	22734933	22743143	+	420	8210	4	0,2738,7655,8129	103,91,145,81	22734933,22737671,22742588,22743062	22735036,22737762,22742733,22743143	ENSMMUT00000009341	chr7:22729463-22734933|chr7:22743143-22781179	0	3	0	8	4	1	9	6	6	2	0	2	6	2	7	2	5	2	2	2	5	1	0	0	1.22719	0	8.91292	4.13141	4.65518	0	0.430566	0	1.41057
mmu_circ_017202	chr7_41446343_41447117_F	ciRNA	Yes	chr7	41446343	41447117	+	774	774	1	0	774	41446343	41447117	PREDICTED.46662.3	chr7:41446343-41447117	2	0	2	5	8	1	6	8	6	3	0	7	0	5	11	11	5	11	0	2	8	0	0	0	0	2.08991	5.94195	0	0	1.98617	0	0	7.75816
mmu_circ_017332	chr7_45804333_45809341_R	circRNA	Yes	chr7	45804333	45809341	-	462	5008	4	0,4164,4595,4817	84,90,97,191	45804333,45808497,45808928,45809150	45804417,45808587,45809025,45809341	ENSMMUT00000021673	chr7:45780506-45804333|chr7:45809341-45832305	0	2	0	3	0	1	6	3	3	0	0	0	2	9	8	7	5	3	0	0	5	0	1	0	0	0	5.94195	1.37714	3.10345	0	0	0	2.11586
mmu_circ_017516	chr7_63773931_63775111_F	circRNA	Yes	chr7	63773931	63775111	+	267	1180	2	0,1047	134,133	63773931,63774978	63774065,63775111	PREDICTED.39269.3	chr7:63771091-63773931|chr7:63775111-63779913	3	0	4	3	2	3	0	7	4	0	0	2	6	0	7	3	0	2	3	3	3	2	1	0	1.84079	3.13487	0	4.13141	0	3.97234	0.861132	0	1.41057
mmu_circ_017576	chr7_69523241_69523862_R	circRNA	Yes	chr7	69523241	69523862	-	204	621	2	0,529	112,92	69523241,69523770	69523353,69523862	ENSMMUT00000021010	chr7:69501553-69523241|chr7:69523862-69528307	8	2	3	7	6	3	17	6	6	2	1	6	7	19	9	4	5	3	4	2	2	2	0	1	2.45439	8.35964	16.8355	4.81997	3.10345	2.97926	0.861132	0.401374	2.11586
mmu_circ_017685	chr7_81358788_81359284_R	circRNA	Yes	chr7	81358788	81359284	-	496	496	1	0	496	81358788	81359284	ENSMMUT00000016555	chr7:81303566-81358788|chr7:81359284-81374545	3	0	2	3	5	4	8	9	3	0	1	2	4	3	5	7	5	5	0	0	3	2	0	1	0	3.13487	7.9226	2.75427	0	1.98617	0.861132	0.401374	3.52644
mmu_circ_017727	chr7_84228597_84229306_R	circRNA	Yes	chr7	84228597	84229306	-	623	709	2	0,491	405,218	84228597,84229088	84229002,84229306	ENSMMUT00000021026	chr7:84227300-84228597|chr7:84229306-84237134	11	2	1	0	1	0	10	2	2	0	5	2	6	2	6	4	9	2	3	0	4	1	0	1	1.84079	11.4945	9.90325	4.13141	3.10345	0.993085	0.430566	0.401374	1.41057
mmu_circ_017884	chr8_101235087_101236012_R	circRNA	Yes	chr8	101235087	101236012	-	333	925	2	0,760	168,165	101235087,101235847	101235255,101236012	ENSMMUT00000038952	chr8:101145171-101235087|chr8:101236012-101265944	3	1	2	0	2	0	8	2	4	2	0	1	4	7	9	3	5	5	4	1	3	1	0	0	2.45439	3.13487	7.9226	2.75427	1.55173	1.98617	0.430566	0	3.52644
mmu_circ_017956	chr8_107920740_107945066_F	circRNA	Yes	chr8	107920740	107945066	+	261	24326	2	0,24224	159,102	107920740,107944964	107920899,107945066	ENSMMUT00000038924	chr8:107818917-107920740|chr8:107945066-108071169	6	1	4	7	2	5	2	8	4	1	4	2	4	7	16	4	9	8	0	1	1	4	0	0	0	6.26973	1.98065	2.75427	1.55173	3.97234	1.72226	0	5.6423
mmu_circ_017981	chr8_11146381_11146606_R	circRNA	Yes	chr8	11146381	11146606	-	225	225	1	0	225	11146381	11146606	ENSMMUT00000001377	chr8:11109796-11146381|chr8:11146606-11170140	3	0	4	6	3	0	1	5	2	0	2	0	4	5	2	2	2	2	0	1	0	0	0	0	0	3.13487	0.990325	2.75427	0	3.97234	0	0	1.41057
mmu_circ_018074	chr8_127953003_127953603_F	circRNA	Yes	chr8	127953003	127953603	+	208	600	2	0,493	101,107	127953003,127953496	127953104,127953603	ENSMMUT00000005007	chr8:127779319-127953003|chr8:127953603-127962555	1	2	4	0	5	0	9	1	0	1	3	0	0	3	10	0	6	2	0	3	2	0	3	0	0	1.04496	8.91292	0	3.10345	3.97234	0	0	1.41057
mmu_circ_018321	chr8_42216485_42217006_R	circRNA	Yes	chr8	42216485	42217006	-	201	521	2	0,455	135,66	42216485,42216940	42216620,42217006	PREDICTED.87451.1	chr8:42210817-42216485|chr8:42217006-42218692	35	0	13	57	37	12	44	16	0	7	13	41	38	14	0	11	33	21	16	11	0	0	0	8	9.81756	36.5734	43.5743	26.1656	0	12.9101	0	3.21099	14.811
mmu_circ_018323	chr8_42216485_42218776_R	circRNA	Yes	chr8	42216485	42218776	-	285	2291	3	0,455,2207	135,66,84	42216485,42216940,42218692	42216620,42217006,42218776	PREDICTED.87451.1	chr8:42210817-42216485|chr8:42218776-42223337	8	0	4	10	7	4	14	6	3	5	2	9	13	9	0	18	12	6	4	5	0	0	0	2	2.45439	8.35964	13.8645	8.95138	0	3.97234	0	0.802748	4.23172
mmu_circ_018351	chr8_43052263_43058347_R	circRNA	Yes	chr8	43052263	43058347	-	324	6084	3	0,3079,5943	97,86,141	43052263,43055342,43058206	43052360,43055428,43058347	ENSMMUT00000028401	chr8:43037373-43052263|chr8:43058347-43064523	8	2	2	2	5	2	8	7	4	4	0	4	6	10	9	0	15	11	5	4	4	2	1	1	3.06799	8.35964	7.9226	4.13141	3.10345	1.98617	0.861132	0.401374	7.75816
mmu_circ_018406	chr8_54406859_54407261_R	circRNA	Yes	chr8	54406859	54407261	-	402	402	1	0	402	54406859	54407261	PREDICTED.48087.4	chr8:54405365-54406859|chr8:54407261-54445535	0	8	11	20	36	9	19	39	22	2	2	8	20	7	55	13	14	33	13	7	16	10	3	7	7.97677	0	18.8162	13.7714	12.4138	10.9239	4.30566	2.80962	23.2745
mmu_circ_018443	chr8_63376334_63382718_F	circRNA	Yes	chr8	63376334	63382718	+	346	6384	3	0,5135,6318	142,138,66	63376334,63381469,63382652	63376476,63381607,63382718	ENSMMUT00000016237	chr8:63362673-63376334|chr8:63382718-63389209	8	1	2	9	1	0	8	6	5	1	1	0	7	2	14	4	9	6	4	0	0	0	0	0	2.45439	8.35964	7.9226	4.81997	1.55173	1.98617	0	0	4.23172
mmu_circ_018452	chr8_64224456_64228000_R	circRNA	Yes	chr8	64224456	64228000	-	264	3544	3	0,1782,3394	69,45,150	64224456,64226238,64227850	64224525,64226283,64228000	PREDICTED.55141.4	chr8:64211476-64224456|chr8:64228000-64233332	8	0	4	6	7	2	0	2	4	0	0	3	0	0	16	10	27	11	3	0	6	3	0	4	1.84079	8.35964	0	0	0	3.97234	1.2917	1.6055	7.75816
mmu_circ_018478	chr8_69734590_69744894_F	circRNA	Yes	chr8	69734590	69744894	+	432	10304	4	0,6050,7669,10095	71,94,58,209	69734590,69740640,69742259,69744685	69734661,69740734,69742317,69744894	PREDICTED.87983.1	chr8:69731862-69734590|chr8:69744894-69747015	22	9	7	0	26	7	39	0	14	0	6	0	0	19	37	0	32	21	3	0	9	0	0	0	1.84079	22.989	38.6227	0	13.9655	6.9516	0	0	14.811
mmu_circ_018648	chr9_101296059_101304694_R	circRNA	Yes	chr9	101296059	101304694	-	510	8635	4	0,5095,5666,8539	95,133,186,96	101296059,101301154,101301725,101304598	101296154,101301287,101301911,101304694	ENSMMUT00000009449	chr9:101251166-101296059|chr9:101304694-101322686	9	0	3	14	3	0	10	6	4	4	2	7	14	10	21	7	12	12	4	0	11	3	2	1	2.45439	9.4046	9.90325	9.63995	0	2.97926	1.2917	0.401374	8.46345
mmu_circ_018650	chr9_101301154_101304694_R	circRNA	Yes	chr9	101301154	101304694	-	415	3540	3	0,571,3444	133,186,96	101301154,101301725,101304598	101301287,101301911,101304694	ENSMMUT00000009449	chr9:101296154-101301154|chr9:101304694-101322686	3	0	3	3	5	0	5	2	2	0	2	0	4	2	3	3	3	3	1	0	0	0	1	0	0.613597	3.13487	4.95162	2.75427	0	2.97926	0	0	2.11586
mmu_circ_018789	chr9_11989578_11991821_F	circRNA	Yes	chr9	11989578	11991821	+	220	2243	2	0,2145	122,98	11989578,11991723	11989700,11991821	ENSMMUT00000043304	chr9:11986973-11989578|chr9:11991821-11997999	6	0	2	2	4	2	6	5	5	2	0	0	7	1	6	3	4	0	2	1	5	1	0	0	1.22719	6.26973	5.94195	4.81997	0	1.98617	0.430566	0	0
mmu_circ_018901	chr9_138315_178337_F	circRNA	Yes	chr9	138315	178337	+	457	40022	3	0,28643,39860	135,160,162	138315,166958,178175	138450,167118,178337	ENSMMUT00000029940	chr9:95289-138315|chr9:178337-194630	0	18	0	0	17	8	35	33	14	5	8	7	0	0	0	35	0	32	8	6	0	7	2	0	4.90878	0	34.6614	0	27.9311	0	3.01396	0	22.5692
mmu_circ_019059	chr9_29692123_29692449_R	circRNA	Yes	chr9	29692123	29692449	-	210	326	2	0,268	152,58	29692123,29692391	29692275,29692449	ENSMMUT00000001949	chr9:29688503-29692123|chr9:29692449-29700178	10	3	7	11	10	4	7	0	5	3	0	5	3	4	7	5	9	7	0	3	4	2	3	0	0	10.4496	6.93227	2.0657	4.65518	6.9516	0.861132	0	4.93701
mmu_circ_019088	chr9_32072280_32074629_R	circRNA	Yes	chr9	32072280	32074629	-	793	2349	2	0,2311	755,38	32072280,32074591	32073035,32074629	ENSMMUT00000006751	chr9:32030348-32072280|chr9:32074629-32098501	7	0	5	5	7	0	16	4	5	0	0	0	5	0	12	5	8	0	4	0	0	2	0	0	2.45439	7.31469	15.8452	3.44284	0	4.96543	0.861132	0	0
mmu_circ_019349	chr9_64242315_64243110_R	circRNA	Yes	chr9	64242315	64243110	-	172	795	2	0,672	49,123	64242315,64242987	64242364,64243110	PREDICTED.92657.2	chr9:64237472-64242315|chr9:64243110-64249785	47	0	30	64	64	0	82	42	46	0	16	47	55	73	147	25	87	62	0	31	31	0	0	9	0	49.1129	81.2066	37.8712	0	29.7926	0	3.61236	43.7278
mmu_circ_019454	chr9_69096899_69104037_R	circRNA	Yes	chr9	69096899	69104037	-	415	7138	4	0,1639,4562,6962	72,115,52,176	69096899,69098538,69101461,69103861	69096971,69098653,69101513,69104037	PREDICTED.104581.3	chr9:69088558-69096899|chr9:69104037-69124975	4	2	1	7	2	0	3	4	4	4	3	5	5	8	11	4	6	6	0	1	7	2	1	0	0	4.17982	2.97097	3.44284	3.10345	0.993085	0.861132	0	4.23172
mmu_circ_019458	chr9_69124975_69125878_R	circRNA	Yes	chr9	69124975	69125878	-	903	903	1	0	903	69124975	69125878	PREDICTED.93114.1	chr9:69104037-69124975|chr9:69125878-69137672	3	3	15	9	16	4	4	15	13	3	3	0	47	5	36	17	15	8	0	3	5	2	0	0	0	3.13487	3.9613	32.3627	4.65518	14.8963	0.861132	0	5.6423
mmu_circ_019951	chrX_30611041_30612471_R	circRNA	Yes	chrX	30611041	30612471	-	311	1430	2	0,1248	129,182	30611041,30612289	30611170,30612471	ENSMMUT00000027179	chrX:30561582-30611041|chrX:30612471-30715902	0	0	2	3	0	0	2	2	2	0	0	2	5	0	9	2	3	2	2	0	0	0	0	1	1.22719	0	1.98065	3.44284	0	1.98617	0	0.401374	1.41057
mmu_circ_019955	chrX_30715902_30728902_R	circRNA	Yes	chrX	30715902	30728902	-	385	13000	3	0,6897,12907	119,173,93	30715902,30722799,30728809	30716021,30722972,30728902	ENSMMUT00000027179	chrX:30612471-30715902|chrX:30728902-30750796	3	6	3	6	3	5	7	5	4	4	4	0	9	2	0	8	11	4	0	2	0	2	0	0	0	3.13487	6.93227	6.19711	9.31035	2.97926	0.861132	0	2.82115
[truncated: 37 more columns]
