# Supplementary material for: Circular RNAs in monkey muscle: age-dependent changes
Source: Aging (Albany NY). 2015 Nov 4;7(11):903–10. doi: 10.18632/aging.100834 (PMC4694061; doi:10.18632/aging.100834)
Supplement: Supplemental Table S4 [file aging-07-0903-s004.xlsx]

## Sheet: Abundant ciRNA
circ_ID	circRNA_name	circ_type	circ_length	circ_genomic_length	Average read number
mmu_circ_013955	chr4_43067752_43067936_F	ciRNA	184	184	23.483
mmu_circ_007427	chr15_41837367_41837519_F	ciRNA	152	152	10.5825
mmu_circ_001451	chr1_24464240_24464383_R	ciRNA	143	143	10.2781
mmu_circ_001450	chr1_24464239_24464383_R	ciRNA	144	144	9.16528
mmu_circ_007426	chr15_41837367_41837518_F	ciRNA	151	151	8.7503
mmu_circ_006990	chr14_9702545_9702752_F	ciRNA	207	207	7.91008
mmu_circ_004916	chr12_83327621_83328165_F	ciRNA	544	544	6.8805
mmu_circ_008599	chr16_59500183_59500353_R	ciRNA	170	170	5.29782
mmu_circ_006322	chr14_1750828_1750927_F	ciRNA	99	99	3.67308
mmu_circ_017202	chr7_41446343_41447117_F	ciRNA	774	774	3.41331
mmu_circ_007854	chr16_10271887_10272943_R	ciRNA	1056	1056	3.35482
mmu_circ_007428	chr15_41837367_41837520_F	ciRNA	153	153	3.23664
mmu_circ_000419	chr1_132448704_132448883_R	ciRNA	179	179	3.18056
mmu_circ_012015	chr20_638720_638934_F	ciRNA	214	214	3.16492
mmu_circ_007947	chr16_1831586_1831712_F	ciRNA	126	126	3.07283
mmu_circ_008716	chr16_6976460_6976635_R	ciRNA	175	175	2.59037
mmu_circ_008726	chr16_70870687_70870813_F	ciRNA	126	126	2.38036
mmu_circ_011820	chr20_27014422_27014571_R	ciRNA	149	149	1.83066
mmu_circ_000702	chr1_143385590_143385870_R	ciRNA	280	280	1.74049
mmu_circ_002483	chr10_399077_399244_F	ciRNA	167	167	1.6334
mmu_circ_006997	chr14_9704408_9704719_F	ciRNA	311	311	1.58112
mmu_circ_003699	chr11_54312400_54312546_R	ciRNA	146	146	1.40393
mmu_circ_010232	chr19_55020040_55020258_R	ciRNA	218	218	1.29425
mmu_circ_017201	chr7_41446343_41447116_F	ciRNA	773	773	1.23084
mmu_circ_006330	chr14_1823252_1823377_F	ciRNA	125	125	1.19292
