# Supplementary material for: Circular RNAs in monkey muscle: age-dependent changes
Source: Aging (Albany NY). 2015 Nov 4;7(11):903–10. doi: 10.18632/aging.100834 (PMC4694061; doi:10.18632/aging.100834)
Supplement: Supplemental Table S5 [file aging-07-0903-s005.xlsx]

## Sheet: Abundant circRNA
circ_ID	circRNA_name	circ_type	circ_length	circ_genomic_length	Average
mmu_circ_010973	chr2_189036368_189048246_F	circRNA	247	11878	39.7917
mmu_circ_016141	chr6_73699670_73701378_R	circRNA	181	1708	37.3295
mmu_circ_019349	chr9_64242315_64243110_R	circRNA	172	795	32.446
mmu_circ_009828	chr18_72438948_72465599_F	circRNA	220	26651	30.8735
mmu_circ_015464	chr6_134290742_134290950_F	circRNA	208	208	27.8239
mmu_circ_011853	chr20_29319557_29319983_F	circRNA	327	426	22.9802
mmu_circ_009432	chr18_14771494_14785401_F	circRNA	679	13907	19.577
mmu_circ_010392	chr2_102990360_103021852_R	circRNA	1726	31492	19.4693
mmu_circ_015458	chr6_134285265_134289462_F	circRNA	285	4197	18.6082
mmu_circ_010916	chr2_185463751_185472097_F	circRNA	405	8346	15.9977
mmu_circ_010390	chr2_102990360_103015114_R	circRNA	1663	24754	15.9155
mmu_circ_018321	chr8_42216485_42217006_R	circRNA	201	521	15.8134
mmu_circ_015243	chr6_119937863_119949709_F	circRNA	537	11846	14.388
mmu_circ_008966	chr17_20763127_20771180_R	circRNA	363	8053	13.6263
mmu_circ_014028	chr4_53822248_53875750_F	circRNA	501	53502	13.2488
mmu_circ_016162	chr6_75664579_75683702_R	circRNA	522	19123	12.0414
mmu_circ_018406	chr8_54406859_54407261_R	circRNA	402	402	11.9532
mmu_circ_011903	chr20_45697008_45715127_F	circRNA	518	18119	11.8126
mmu_circ_000635	chr1_142073777_142074235_R	circRNA	273	458	11.6784
mmu_circ_016934	chr7_20095753_20096884_F	circRNA	1131	1131	11.2673
mmu_circ_012245	chr3_10250155_10255475_R	circRNA	420	5320	10.7163
mmu_circ_003308	chr11_22188393_22201342_R	circRNA	354	12949	9.77246
mmu_circ_010405	chr2_103014133_103021852_R	circRNA	1044	7719	9.75425
mmu_circ_009737	chr18_52215732_52236337_F	circRNA	804	20605	9.73698
mmu_circ_011904	chr20_45697008_45744767_F	circRNA	634	47759	9.51227
mmu_circ_014472	chr5_135960594_135961059_F	circRNA	269	465	9.45721
mmu_circ_004651	chr12_43582359_43582775_R	circRNA	323	416	8.98499
mmu_circ_018478	chr8_69734590_69744894_F	circRNA	432	10304	8.97791
mmu_circ_018901	chr9_138315_178337_F	circRNA	457	40022	8.55606
mmu_circ_010404	chr2_103014133_103015114_R	circRNA	981	981	8.37434
mmu_circ_007566	chr15_60489615_60491585_F	circRNA	1970	1970	8.13734
mmu_circ_009443	chr18_14771494_14826320_F	circRNA	1600	54826	8.06757
mmu_circ_016092	chr6_69020276_69025172_F	circRNA	241	4896	7.87574
mmu_circ_005699	chr13_58437748_58447822_R	circRNA	278	10074	7.76202
mmu_circ_006028	chr14_105577271_105585481_R	circRNA	184	8210	7.6265
mmu_circ_019458	chr9_69124975_69125878_R	circRNA	903	903	7.25144
mmu_circ_007062	chr15_105230911_105236113_F	circRNA	330	5202	7.02777
mmu_circ_006452	chr14_38712203_38712717_F	circRNA	229	514	6.98888
mmu_circ_009430	chr18_14771494_14785401_F	circRNA	574	13907	6.85953
mmu_circ_009920	chr19_11552087_11553234_R	circRNA	188	1147	6.79281
mmu_circ_005249	chr13_133513557_133515288_R	circRNA	354	1731	6.74409
mmu_circ_007121	chr15_11988702_12000406_F	circRNA	170	11704	6.69358
mmu_circ_004742	chr12_64893831_64898485_F	circRNA	187	4654	6.6025
mmu_circ_009830	chr18_72438948_72486949_F	circRNA	315	48001	6.4212
mmu_circ_010509	chr2_116858591_116862368_F	circRNA	258	3777	6.39121
mmu_circ_005869	chr13_72987366_73002997_R	circRNA	390	15631	6.37271
mmu_circ_002164	chr1_98173777_98183127_F	circRNA	410	9350	6.17018
mmu_circ_003723	chr11_55045846_55050896_F	circRNA	304	5050	5.83166
mmu_circ_013004	chr3_47382251_47382535_F	circRNA	192	284	5.65296
mmu_circ_000946	chr1_177355990_177358508_R	circRNA	263	2518	5.62078
mmu_circ_018648	chr9_101296059_101304694_R	circRNA	510	8635	5.59066
mmu_circ_006575	chr14_57630462_57631853_F	circRNA	300	1391	5.57066
mmu_circ_011105	chr2_45290723_45308296_R	circRNA	566	17573	5.45673
mmu_circ_001709	chr1_43961735_43966546_R	circRNA	360	4811	5.38527
mmu_circ_012372	chr3_125226867_125227639_R	circRNA	314	772	5.34009
mmu_circ_001616	chr1_38167477_38170326_F	circRNA	755	2849	5.33321
mmu_circ_012791	chr3_188422618_188441697_R	circRNA	410	19079	5.30648
mmu_circ_008860	chr17_11887391_11897424_R	circRNA	438	10033	5.28119
mmu_circ_009844	chr18_72438948_72524151_F	circRNA	549	85203	5.26167
mmu_circ_019218	chr9_50420095_50435842_R	circRNA	406	15747	5.12075
mmu_circ_013726	chr4_167548271_167554069_R	circRNA	320	5798	5.1077
mmu_circ_018323	chr8_42216485_42218776_R	circRNA	285	2291	5.07026
mmu_circ_002563	chr10_6079576_6081720_R	circRNA	258	2144	5.01771
mmu_circ_012525	chr3_145170659_145176677_F	circRNA	427	6018	5.00885
mmu_circ_019217	chr9_50420095_50435842_R	circRNA	222	15747	4.9586
mmu_circ_004957	chr12_90754592_90757353_F	circRNA	656	2761	4.85729
mmu_circ_002444	chr10_36614302_36615617_R	circRNA	236	1315	4.83499
mmu_circ_009792	chr18_6267526_6279900_R	circRNA	415	12374	4.66338
mmu_circ_000647	chr1_142094520_142096635_R	circRNA	1062	2115	4.58639
mmu_circ_002957	chr11_110177698_110185749_F	circRNA	382	8051	4.5614
mmu_circ_012856	chr3_194487066_194488030_F	circRNA	171	964	4.52247
mmu_circ_012452	chr3_139559131_139566453_R	circRNA	449	7322	4.51825
mmu_circ_014507	chr5_140155342_140170694_F	circRNA	222	15352	4.50337
mmu_circ_017576	chr7_69523241_69523862_R	circRNA	204	621	4.48645
mmu_circ_007931	chr16_16461818_16466480_R	circRNA	364	4662	4.42794
mmu_circ_012242	chr3_10231050_10233173_R	circRNA	213	2123	4.31645
mmu_circ_019059	chr9_29692123_29692449_R	circRNA	210	326	4.30947
mmu_circ_007371	chr15_36259766_36260004_R	circRNA	167	238	4.23229
mmu_circ_010824	chr2_173225548_173289402_R	circRNA	741	63854	4.19854
mmu_circ_000970	chr1_18416230_18426664_F	circRNA	384	10434	4.15382
mmu_circ_010556	chr2_129553930_129555366_R	circRNA	322	1436	4.14559
mmu_circ_001174	chr1_205687437_205691830_R	circRNA	251	4393	4.0969
mmu_circ_014509	chr5_140155342_140181652_F	circRNA	488	26310	4.07434
mmu_circ_004743	chr12_64893831_64900252_F	circRNA	187	6421	4.0511
mmu_circ_006196	chr14_117183235_117183702_R	circRNA	467	467	4.0441
mmu_circ_018351	chr8_43052263_43058347_R	circRNA	324	6084	4.03054
mmu_circ_013732	chr4_17571700_17578916_F	circRNA	336	7216	3.98493
mmu_circ_004276	chr12_30108127_30136429_R	circRNA	944	28302	3.96307
mmu_circ_013358	chr4_108179408_108186280_R	circRNA	447	6872	3.94447
mmu_circ_014010	chr4_4766090_4766757_F	circRNA	667	667	3.92866
mmu_circ_001234	chr1_212585999_212604623_R	circRNA	315	18624	3.90018
mmu_circ_011320	chr2_79796174_79796634_R	circRNA	270	460	3.89569
mmu_circ_006362	chr14_24950335_24956328_F	circRNA	713	5993	3.88049
mmu_circ_008099	chr16_30281399_30281950_F	circRNA	551	551	3.87907
mmu_circ_010395	chr2_102997878_103015114_R	circRNA	1285	17236	3.87497
mmu_circ_016117	chr6_69238216_69240983_F	circRNA	268	2767	3.82811
mmu_circ_002165	chr1_98173777_98202787_F	circRNA	484	29010	3.71587
mmu_circ_012925	chr3_31122981_31126472_R	circRNA	223	3491	3.71232
mmu_circ_018452	chr8_64224456_64228000_R	circRNA	264	3544	3.70681
mmu_circ_004044	chr12_11444149_11447805_F	circRNA	473	3656	3.64483
mmu_circ_004759	chr12_66324640_66327107_F	circRNA	342	2467	3.62661
mmu_circ_002674	chr10_73827901_73835974_F	circRNA	294	8073	3.48689
mmu_circ_004183	chr12_16321999_16323148_R	circRNA	260	1149	3.43843
mmu_circ_011815	chr20_26964213_26966407_R	circRNA	220	2194	3.40128
mmu_circ_011262	chr2_69918726_69945415_R	circRNA	420	26689	3.36915
mmu_circ_017956	chr8_107920740_107945066_F	circRNA	261	24326	3.35021
mmu_circ_003430	chr11_31569973_31573907_R	circRNA	176	3934	3.34677
mmu_circ_011418	chr2_86313917_86314652_R	circRNA	227	735	3.33245
mmu_circ_019454	chr9_69096899_69104037_R	circRNA	415	7138	3.31539
mmu_circ_001511	chr1_29373853_29376975_F	circRNA	783	3122	3.31419
mmu_circ_019955	chrX_30715902_30728902_R	circRNA	385	13000	3.29899
mmu_circ_009078	chr17_39523707_39558770_F	circRNA	454	35063	3.288
mmu_circ_003171	chr11_123583560_123584505_R	circRNA	945	945	3.18831
mmu_circ_013236	chr3_93178058_93178204_R	circRNA	146	146	3.169
mmu_circ_010814	chr2_173225548_173247744_R	circRNA	342	22196	3.14115
mmu_circ_015451	chr6_132617343_132617915_F	circRNA	572	572	3.1148
mmu_circ_018477	chr8_69734590_69744894_F	circRNA	442	10304	3.09283
mmu_circ_012417	chr3_135282337_135295365_F	circRNA	310	13028	3.07727
mmu_circ_001570	chr1_33760378_33763248_R	circRNA	438	2870	3.07169
mmu_circ_018191	chr8_18691651_18697027_R	circRNA	448	5376	3.02866
mmu_circ_003605	chr11_47935730_47966058_F	circRNA	331	30328	3.02494
mmu_circ_018443	chr8_63376334_63382718_F	circRNA	346	6384	3.01986
mmu_circ_010142	chr19_44919930_44920454_F	circRNA	282	524	2.95176
mmu_circ_010493	chr2_114783377_114787421_R	circRNA	526	4044	2.94632
mmu_circ_014033	chr4_53842898_53917409_F	circRNA	423	74511	2.93861
mmu_circ_008906	chr17_15578220_15578554_R	circRNA	250	334	2.928
mmu_circ_014432	chr5_12778925_12790164_R	circRNA	276	11239	2.90679
mmu_circ_019088	chr9_32072280_32074629_R	circRNA	793	2349	2.90543
mmu_circ_010992	chr2_20044063_20046839_R	circRNA	2776	2776	2.84662
mmu_circ_004242	chr12_23567594_23572540_R	circRNA	432	4946	2.82915
mmu_circ_004932	chr12_86464617_86507773_R	circRNA	1503	43156	2.8227
mmu_circ_008573	chr16_58058720_58060185_F	circRNA	189	1465	2.79471
mmu_circ_002034	chr1_80561412_80562956_R	circRNA	191	1544	2.7631
mmu_circ_003696	chr11_54132011_54136037_R	circRNA	418	4026	2.73221
mmu_circ_017727	chr7_84228597_84229306_R	circRNA	623	709	2.71771
mmu_circ_014513	chr5_140162122_140181652_F	circRNA	413	19530	2.70097
mmu_circ_016564	chr7_128599861_128600291_F	circRNA	430	430	2.67992
mmu_circ_003126	chr11_121588694_121589095_F	circRNA	322	401	2.67601
mmu_circ_002784	chr10_85077901_85078416_F	circRNA	325	515	2.67345
mmu_circ_018905	chr9_138315_178337_F	circRNA	668	40022	2.67254
mmu_circ_004374	chr12_37576656_37578016_R	circRNA	1360	1360	2.66442
mmu_circ_007064	chr15_105230911_105259565_F	circRNA	556	28654	2.63638
mmu_circ_010510	chr2_116858591_116871693_F	circRNA	505	13102	2.6175
mmu_circ_016271	chr6_91726674_91727726_R	circRNA	249	1052	2.60282
mmu_circ_002541	chr10_54655595_54658608_F	circRNA	329	3013	2.59508
mmu_circ_017022	chr7_22734933_22743143_F	circRNA	420	8210	2.57719
mmu_circ_006582	chr14_58473416_58481042_F	circRNA	707	7626	2.57429
mmu_circ_003691	chr11_53750176_53753595_R	circRNA	373	3419	2.56486
mmu_circ_002956	chr11_110177698_110181788_F	circRNA	272	4090	2.55621
mmu_circ_003606	chr11_47935730_47970854_F	circRNA	674	35124	2.54
mmu_circ_005764	chr13_61731535_61743299_R	circRNA	307	11764	2.53492
mmu_circ_015578	chr6_139835901_139837098_R	circRNA	1197	1197	2.47086
mmu_circ_019956	chrX_30715902_30755824_R	circRNA	556	39922	2.4659
mmu_circ_017685	chr7_81358788_81359284_R	circRNA	496	496	2.45011
mmu_circ_005671	chr13_54206823_54213750_R	circRNA	669	6927	2.43005
mmu_circ_005432	chr13_31955804_31970345_R	circRNA	294	14541	2.42579
mmu_circ_003216	chr11_124782323_124783316_R	circRNA	341	993	2.41876
mmu_circ_005566	chr13_39277251_39285023_R	circRNA	344	7772	2.41404
mmu_circ_006911	chr14_84353726_84362875_R	circRNA	322	9149	2.40702
mmu_circ_002390	chr10_30146640_30147991_R	circRNA	263	1351	2.40502
mmu_circ_015038	chr5_77486630_77514747_R	circRNA	481	28117	2.39619
mmu_circ_014066	chr4_57130142_57135331_F	circRNA	259	5189	2.3949
mmu_circ_015143	chr5_95497724_95510306_F	circRNA	265	12582	2.39416
mmu_circ_018930	chr9_16120137_16135002_R	circRNA	636	14865	2.39059
mmu_circ_002120	chr1_95320392_95333262_F	circRNA	233	12870	2.38777
mmu_circ_008386	chr16_48806470_48816575_R	circRNA	648	10105	2.38501
mmu_circ_015704	chr6_169331983_169334886_F	circRNA	224	2903	2.37586
mmu_circ_004068	chr12_15145943_15153551_R	circRNA	540	7608	2.37506
mmu_circ_017585	chr7_70150964_70152960_F	circRNA	264	1996	2.37358
mmu_circ_006895	chr14_84328521_84334852_R	circRNA	451	6331	2.36569
mmu_circ_000704	chr1_143405314_143409761_R	circRNA	664	4447	2.35684
mmu_circ_009083	chr17_39552118_39558770_F	circRNA	303	6652	2.3256
mmu_circ_014422	chr5_121315473_121327289_R	circRNA	396	11816	2.30525
mmu_circ_015060	chr5_79997804_79999239_F	circRNA	1024	1435	2.30147
mmu_circ_015981	chr6_53622985_53624588_R	circRNA	427	1603	2.29319
mmu_circ_017884	chr8_101235087_101236012_R	circRNA	333	925	2.27579
mmu_circ_018902	chr9_138315_178337_F	circRNA	552	40022	2.27316
mmu_circ_000204	chr1_11564080_11579520_R	circRNA	308	15440	2.26572
mmu_circ_006449	chr14_38535928_38537027_R	circRNA	1099	1099	2.26496
mmu_circ_014269	chr4_95400562_95404880_R	circRNA	375	4318	2.25104
mmu_circ_003825	chr11_7050778_7050911_F	circRNA	133	133	2.24461
mmu_circ_004191	chr12_20107255_20124819_F	circRNA	559	17564	2.23371
mmu_circ_000436	chr1_132759866_132760570_F	circRNA	265	704	2.23184
mmu_circ_004835	chr12_74076554_74077254_R	circRNA	252	700	2.21855
mmu_circ_018074	chr8_127953003_127953603_F	circRNA	208	600	2.2095
mmu_circ_010447	chr2_107006668_107008809_R	circRNA	321	2141	2.19693
mmu_circ_003217	chr11_124869510_124873111_F	circRNA	301	3601	2.17866
mmu_circ_007236	chr15_2445095_2446531_F	circRNA	556	1436	2.17261
mmu_circ_011216	chr2_5966068_6029855_R	circRNA	849	63787	2.1725
mmu_circ_006278	chr14_128172492_128173744_F	circRNA	298	1252	2.17164
mmu_circ_009160	chr17_6131809_6147726_F	circRNA	328	15917	2.16855
mmu_circ_008276	chr16_43976978_44059137_F	circRNA	762	82159	2.1612
mmu_circ_013359	chr4_108179408_108200609_R	circRNA	576	21201	2.15184
mmu_circ_001326	chr1_221539994_221545902_F	circRNA	190	5908	2.14113
mmu_circ_003781	chr11_65812919_65813210_F	circRNA	165	291	2.13439
mmu_circ_007501	chr15_50215198_50243797_F	circRNA	436	28599	2.11752
mmu_circ_018789	chr9_11989578_11991821_F	circRNA	220	2243	2.11195
mmu_circ_000101	chr1_10807574_10808593_F	circRNA	211	1019	2.10835
mmu_circ_010109	chr19_43465500_43466048_F	circRNA	220	548	2.10444
mmu_circ_006547	chr14_55587402_55609770_F	circRNA	449	22368	2.09169
mmu_circ_013218	chr3_90488539_90494179_F	circRNA	347	5640	2.06976
mmu_circ_005842	chr13_71619966_71626810_F	circRNA	886	6844	2.06644
mmu_circ_003234	chr11_12601545_12601939_R	circRNA	394	394	2.05762
mmu_circ_016870	chr7_165332309_165333061_F	circRNA	251	752	2.04148
mmu_circ_017332	chr7_45804333_45809341_R	circRNA	462	5008	2.03772
mmu_circ_007341	chr15_28887588_28898539_R	circRNA	487	10951	2.03149
mmu_circ_019876	chrX_23329545_23337726_F	circRNA	206	8181	2.01057
mmu_circ_004958	chr12_90754592_90757353_F	circRNA	729	2761	2.00889
mmu_circ_013827	chr4_30161513_30161780_F	circRNA	189	267	2.00015
mmu_circ_009425	chr18_14771494_14774785_F	circRNA	302	3291	1.99663
mmu_circ_013943	chr4_42736408_42738386_F	circRNA	207	1978	1.987
mmu_circ_015322	chr6_129297451_129298402_R	circRNA	327	951	1.982
mmu_circ_013177	chr3_81696426_81698887_R	circRNA	295	2461	1.98199
mmu_circ_010555	chr2_129484214_129555366_R	circRNA	496	71152	1.95724
mmu_circ_012507	chr3_143515194_143516799_R	circRNA	333	1605	1.95346
mmu_circ_007090	chr15_106872941_106894716_F	circRNA	204	21775	1.94601
mmu_circ_012766	chr3_180889104_180889681_F	circRNA	348	577	1.94548
mmu_circ_001105	chr1_197678773_197704439_F	circRNA	341	25666	1.94221
mmu_circ_003881	chr11_84928844_84929095_F	circRNA	251	251	1.93999
mmu_circ_019871	chrX_21997725_22005040_F	circRNA	665	7315	1.93774
mmu_circ_018698	chr9_103131248_103132041_F	circRNA	180	793	1.93678
mmu_circ_016048	chr6_63909249_63925462_F	circRNA	899	16213	1.93424
mmu_circ_010393	chr2_102990360_103021852_R	circRNA	1849	31492	1.91317
mmu_circ_003134	chr11_121824431_121826396_R	circRNA	312	1965	1.90239
mmu_circ_009291	chr17_91194140_91222411_F	circRNA	507	28271	1.89934
mmu_circ_012277	chr3_107472767_107473031_R	circRNA	264	264	1.89623
mmu_circ_014165	chr4_75142955_75143296_R	circRNA	250	341	1.89251
mmu_circ_001364	chr1_225997759_226004691_F	circRNA	242	6932	1.87511
mmu_circ_015325	chr6_129334562_129342432_R	circRNA	927	7870	1.85794
mmu_circ_006235	chr14_119447082_119449067_F	circRNA	290	1985	1.85745
mmu_circ_014924	chr5_53459109_53461162_F	circRNA	346	2053	1.85549
mmu_circ_000935	chr1_172872415_172887715_F	circRNA	376	15300	1.85521
mmu_circ_000145	chr1_112467111_112468281_R	circRNA	190	1170	1.85414
mmu_circ_018180	chr8_17591120_17601982_R	circRNA	336	10862	1.85153
mmu_circ_015376	chr6_130728399_130743416_R	circRNA	599	15017	1.84727
mmu_circ_001769	chr1_48548455_48549928_R	circRNA	267	1473	1.84049
mmu_circ_007085	chr15_106767130_106790819_F	circRNA	316	23689	1.83528
mmu_circ_001793	chr1_49013323_49017086_R	circRNA	208	3763	1.82955
mmu_circ_003583	chr11_47600997_47608537_F	circRNA	317	7540	1.82672
mmu_circ_017516	chr7_63773931_63775111_F	circRNA	267	1180	1.8216
mmu_circ_014492	chr5_140084750_140100769_F	circRNA	548	16019	1.81843
mmu_circ_010087	chr19_41021072_41031554_F	circRNA	566	10482	1.79106
mmu_circ_009564	chr18_28990668_28996967_R	circRNA	638	6299	1.78868
mmu_circ_011773	chr20_23274449_23285452_F	circRNA	770	11003	1.78037
mmu_circ_004699	chr12_60416488_60417357_R	circRNA	358	869	1.77401
mmu_circ_004041	chr12_105363783_105364985_F	circRNA	233	1202	1.7688
mmu_circ_009934	chr19_12599228_12599734_R	circRNA	338	506	1.76362
mmu_circ_014455	chr5_133397051_133417470_R	circRNA	406	20419	1.75723
mmu_circ_019837	chrX_153312486_153312847_R	circRNA	236	361	1.75536
mmu_circ_008023	chr16_2467056_2468879_F	circRNA	367	1823	1.75262
mmu_circ_008152	chr16_33541989_33543548_R	circRNA	409	1559	1.74203
mmu_circ_009720	chr18_5193897_5233384_R	circRNA	994	39487	1.74089
mmu_circ_007170	chr15_13705954_13717718_R	circRNA	367	11764	1.73935
mmu_circ_015176	chr6_10347197_10349119_F	circRNA	317	1922	1.731
mmu_circ_000199	chr1_115593886_115603748_R	circRNA	218	9862	1.72041
mmu_circ_012250	chr3_102627317_102627700_R	circRNA	383	383	1.70507
mmu_circ_017950	chr8_104860810_104862370_R	circRNA	324	1560	1.69604
mmu_circ_011261	chr2_69918726_69938802_R	circRNA	263	20076	1.69319
mmu_circ_001525	chr1_30483646_30488022_F	circRNA	170	4376	1.69269
mmu_circ_013307	chr4_103930788_103937276_R	circRNA	328	6488	1.69064
mmu_circ_018650	chr9_101301154_101304694_R	circRNA	415	3540	1.68493
mmu_circ_015918	chr6_43542499_43560922_F	circRNA	1017	18423	1.67421
mmu_circ_013176	chr3_81669253_81670101_R	circRNA	238	848	1.66587
mmu_circ_017732	chr7_85728735_85730973_R	circRNA	192	2238	1.66586
mmu_circ_019644	chr9_96084457_96119101_R	circRNA	1083	34644	1.64014
mmu_circ_001371	chr1_226302990_226304418_R	circRNA	185	1428	1.63912
mmu_circ_018360	chr8_43531529_43547567_F	circRNA	257	16038	1.63514
mmu_circ_001470	chr1_26020040_26020802_R	circRNA	248	762	1.62938
mmu_circ_003100	chr11_117033162_117047920_R	circRNA	169	14758	1.62762
mmu_circ_001580	chr1_34113992_34125858_F	circRNA	440	11866	1.6267
mmu_circ_014536	chr5_144554817_144560149_R	circRNA	259	5332	1.61255
mmu_circ_009112	chr17_55747254_55751478_R	circRNA	318	4224	1.60039
mmu_circ_000980	chr1_18432781_18434970_F	circRNA	294	2189	1.59482
mmu_circ_009034	chr17_28269557_28269915_F	circRNA	358	358	1.58801
mmu_circ_002809	chr10_85761625_85762740_F	circRNA	241	1115	1.58486
mmu_circ_001259	chr1_213683697_213694497_R	circRNA	369	10800	1.57607
mmu_circ_011214	chr2_5966068_5973322_R	circRNA	563	7254	1.5703
mmu_circ_001860	chr1_55650930_55651251_F	circRNA	210	321	1.56397
mmu_circ_017981	chr8_11146381_11146606_R	circRNA	225	225	1.56271
mmu_circ_019457	chr9_69101461_69104037_R	circRNA	228	2576	1.55841
mmu_circ_006646	chr14_6158792_6177086_R	circRNA	423	18294	1.54992
mmu_circ_011488	chr2_89476194_89486793_F	circRNA	903	10599	1.54858
mmu_circ_010825	chr2_173225548_173289402_R	circRNA	589	63854	1.54454
mmu_circ_010022	chr19_36447020_36448213_F	circRNA	215	1193	1.53475
mmu_circ_010595	chr2_135238372_135256234_R	circRNA	372	17862	1.52963
mmu_circ_003247	chr11_130100001_130106079_R	circRNA	712	6078	1.52884
mmu_circ_005876	chr13_73283316_73296861_R	circRNA	268	13545	1.52299
mmu_circ_013272	chr3_98595700_98598744_F	circRNA	232	3044	1.51938
mmu_circ_013458	chr4_119140364_119142253_R	circRNA	286	1889	1.49432
mmu_circ_000724	chr1_146109263_146114792_R	circRNA	254	5529	1.48977
mmu_circ_019219	chr9_50420095_50435842_R	circRNA	469	15747	1.48088
mmu_circ_020160	chrX_9257078_9273621_R	circRNA	191	16543	1.47935
mmu_circ_019215	chr9_50420095_50430243_R	circRNA	359	10148	1.47596
mmu_circ_009419	chr18_14559154_14563133_R	circRNA	291	3979	1.47473
mmu_circ_013168	chr3_81496219_81498593_F	circRNA	192	2374	1.47113
mmu_circ_011275	chr2_74218791_74254384_R	circRNA	418	35593	1.46299
mmu_circ_010397	chr2_102997878_103021852_R	circRNA	1348	23974	1.45814
mmu_circ_002311	chr10_26394822_26403571_R	circRNA	416	8749	1.45393
mmu_circ_019026	chr9_27201459_27202919_R	circRNA	261	1460	1.45359
mmu_circ_003019	chr11_111847210_111848921_R	circRNA	181	1711	1.45319
mmu_circ_018256	chr8_30723385_30728020_F	circRNA	180	4635	1.43588
mmu_circ_016157	chr6_75625286_75683702_R	circRNA	871	58416	1.4308
mmu_circ_005899	chr13_85599993_85606103_F	circRNA	575	6110	1.42882
mmu_circ_019817	chrX_148886834_148903089_R	circRNA	366	16255	1.42261
mmu_circ_013684	chr4_157378546_157390608_F	circRNA	546	12062	1.41656
mmu_circ_019579	chr9_91560713_91570667_R	circRNA	297	9954	1.40741
mmu_circ_015873	chr6_38355898_38362964_R	circRNA	580	7066	1.40594
mmu_circ_003415	chr11_31488273_31508698_R	circRNA	675	20425	1.40082
mmu_circ_016401	chr7_113212282_113212505_R	circRNA	223	223	1.40055
mmu_circ_006442	chr14_37731499_37731999_R	circRNA	261	500	1.39833
mmu_circ_007734	chr15_86500793_86504232_R	circRNA	259	3439	1.39299
mmu_circ_001205	chr1_210106830_210125071_F	circRNA	767	18241	1.38923
mmu_circ_016766	chr7_154695485_154699683_R	circRNA	717	4198	1.3773
mmu_circ_016681	chr7_138221308_138221977_R	circRNA	244	669	1.37521
mmu_circ_012790	chr3_188422618_188441697_R	circRNA	342	19079	1.36094
mmu_circ_019100	chr9_32637022_32659336_F	circRNA	846	22314	1.36079
mmu_circ_002610	chr10_65556310_65565187_R	circRNA	490	8877	1.36024
mmu_circ_003505	chr11_42861701_42864442_F	circRNA	793	2741	1.35929
mmu_circ_002512	chr10_51472682_51482124_F	circRNA	957	9442	1.35221
mmu_circ_005549	chr13_38556718_38562851_R	circRNA	357	6133	1.35198
mmu_circ_001508	chr1_29075135_29077068_F	circRNA	219	1933	1.35162
mmu_circ_009761	chr18_55915203_55928514_F	circRNA	280	13311	1.35143
mmu_circ_017311	chr7_44002943_44003213_R	circRNA	270	270	1.35058
mmu_circ_017416	chr7_54315562_54317116_R	circRNA	535	1554	1.34845
mmu_circ_000392	chr1_130076449_130103478_F	circRNA	838	27029	1.34742
mmu_circ_008587	chr16_59276583_59277378_R	circRNA	283	795	1.34447
mmu_circ_016904	chr7_168706596_168712035_F	circRNA	304	5439	1.34243
mmu_circ_000205	chr1_11564080_11637812_R	circRNA	434	73732	1.33989
mmu_circ_018521	chr8_72331712_72338105_R	circRNA	345	6393	1.33778
mmu_circ_019354	chr9_64835328_64864960_F	circRNA	468	29632	1.33778
mmu_circ_000377	chr1_129690110_129691682_F	circRNA	256	1572	1.33511
mmu_circ_011956	chr20_51390694_51392309_F	circRNA	1615	1615	1.33139
mmu_circ_006579	chr14_58450013_58481042_F	circRNA	865	31029	1.3282
mmu_circ_000202	chr1_115603585_115609948_R	circRNA	246	6363	1.32529
mmu_circ_008644	chr16_61151203_61159165_R	circRNA	213	7962	1.32431
mmu_circ_018520	chr8_72313974_72338105_R	circRNA	510	24131	1.32216
mmu_circ_014927	chr5_53508581_53509293_R	circRNA	712	712	1.31994
mmu_circ_003604	chr11_47935730_47952311_F	circRNA	200	16581	1.31925
mmu_circ_006848	chr14_76660431_76663532_R	circRNA	205	3101	1.31817
mmu_circ_019352	chr9_64835328_64845580_F	circRNA	257	10252	1.31167
mmu_circ_003936	chr11_94060218_94062124_R	circRNA	392	1906	1.30675
mmu_circ_003780	chr11_65809079_65813210_F	circRNA	215	4131	1.3059
mmu_circ_011559	chr2_99263578_99273772_R	circRNA	337	10194	1.30179
mmu_circ_003218	chr11_124869510_124873111_F	circRNA	322	3601	1.29647
mmu_circ_012356	chr3_124925725_124958469_R	circRNA	887	32744	1.29644
mmu_circ_003561	chr11_47571778_47574981_F	circRNA	380	3203	1.2923
mmu_circ_006260	chr14_12648143_12648662_R	circRNA	334	519	1.28746
mmu_circ_008973	chr17_21108843_21130753_F	circRNA	917	21910	1.28721
mmu_circ_018881	chr9_132358592_132366012_F	circRNA	168	7420	1.28639
mmu_circ_019267	chr9_6069355_6075746_R	circRNA	343	6391	1.28578
mmu_circ_015725	chr6_173710956_173733268_F	circRNA	2866	22312	1.2848
mmu_circ_000259	chr1_120368309_120386868_F	circRNA	553	18559	1.276
mmu_circ_011909	chr20_45699220_45715127_F	circRNA	428	15907	1.27461
mmu_circ_017466	chr7_57333107_57333588_R	circRNA	243	481	1.27382
mmu_circ_018070	chr8_127093753_127094039_R	circRNA	187	286	1.27272
mmu_circ_014029	chr4_53822248_53917409_F	circRNA	705	95161	1.26967
mmu_circ_018312	chr8_39575295_39576593_F	circRNA	230	1298	1.26876
mmu_circ_005418	chr13_28778802_28783436_F	circRNA	224	4634	1.26678
mmu_circ_018586	chr8_92663386_92678149_F	circRNA	596	14763	1.26542
mmu_circ_012287	chr3_107544914_107553628_R	circRNA	642	8714	1.264
mmu_circ_002624	chr10_67761933_67784798_F	circRNA	435	22865	1.26155
mmu_circ_019153	chr9_35723344_35735976_F	circRNA	315	12632	1.25825
mmu_circ_001313	chr1_220310186_220312529_R	circRNA	322	2343	1.25217
mmu_circ_002602	chr10_64969984_64970450_R	circRNA	466	466	1.25214
mmu_circ_011877	chr20_3982088_3982801_R	circRNA	713	713	1.24303
mmu_circ_014728	chr5_33073413_33086123_F	circRNA	507	12710	1.24016
mmu_circ_019472	chr9_73638460_73648002_R	circRNA	294	9542	1.24012
mmu_circ_012926	chr3_31866731_31895998_F	circRNA	205	29267	1.23803
mmu_circ_006344	chr14_24630194_24631266_F	circRNA	215	1072	1.23795
mmu_circ_008658	chr16_62045447_62047385_F	circRNA	389	1938	1.23473
mmu_circ_000483	chr1_133995848_133996590_R	circRNA	742	742	1.23179
mmu_circ_006757	chr14_71856483_71869929_R	circRNA	312	13446	1.23073
mmu_circ_001118	chr1_197769525_197776168_F	circRNA	649	6643	1.22948
mmu_circ_011254	chr2_68682709_68696464_F	circRNA	402	13755	1.22637
mmu_circ_009937	chr19_12747255_12749819_F	circRNA	396	2564	1.22481
mmu_circ_005336	chr13_24055683_24060102_F	circRNA	342	4419	1.22458
mmu_circ_017878	chr8_100351835_100362416_F	circRNA	392	10581	1.22216
mmu_circ_003246	chr11_130100001_130106079_R	circRNA	654	6078	1.2221
mmu_circ_000992	chr1_185462297_185481187_R	circRNA	469	18890	1.21954
mmu_circ_017025	chr7_22737671_22743143_F	circRNA	317	5472	1.21579
mmu_circ_016445	chr7_115769316_115772442_F	circRNA	262	3126	1.2153
mmu_circ_013924	chr4_42490376_42492830_F	circRNA	296	2454	1.20714
mmu_circ_014709	chr5_320737_323521_R	circRNA	249	2784	1.20069
mmu_circ_019127	chr9_34456610_34471525_R	circRNA	354	14915	1.19962
mmu_circ_008552	chr16_56690147_56691288_R	circRNA	315	1141	1.19832
mmu_circ_013577	chr4_13599745_13612391_R	circRNA	1020	12646	1.19625
mmu_circ_013751	chr4_17728830_17734606_R	circRNA	291	5776	1.18973
mmu_circ_015061	chr5_80037024_80048658_F	circRNA	224	11634	1.18794
mmu_circ_009702	chr18_51616443_51624153_F	circRNA	246	7710	1.18725
mmu_circ_010901	chr2_180940367_180941051_F	circRNA	684	684	1.18643
mmu_circ_014353	chr5_10990474_10992494_R	circRNA	239	2020	1.18456
mmu_circ_008174	chr16_35219904_35222863_R	circRNA	298	2959	1.18217
mmu_circ_009486	chr18_17249843_17264809_R	circRNA	320	14966	1.18129
mmu_circ_005031	chr12_96677531_96686618_F	circRNA	1107	9087	1.17998
mmu_circ_003642	chr11_50477192_50477392_F	circRNA	200	200	1.17846
mmu_circ_000512	chr1_134298784_134299447_F	circRNA	202	663	1.17725
mmu_circ_000230	chr1_117449388_117450667_R	circRNA	397	1279	1.17687
mmu_circ_009429	chr18_14771494_14785401_F	circRNA	444	13907	1.1724
mmu_circ_019951	chrX_30611041_30612471_R	circRNA	311	1430	1.17041
mmu_circ_014026	chr4_53822248_53842943_F	circRNA	327	20695	1.1606
